# Supplementary material
Source: MDPI journal article supplement (https://www.mdpi.com/2304-6740/7/10/119)
Supplement: s1 [file s1]

# Supplementary Materials: A Raman Spectroscopic and Computational Study of New Aromatic Pyrimidine-Based Halogen Bond Acceptors

April E. S. Hardin, Thomas L. Ellington, Suong T. Nguyen, Arnold L. Rheingold, Gregory S. Tschumper, Davita L. Watkins and Nathan I. Hammer

## General Summary

Reagents and solvents were purchased from commercial sources and used without further purification unless otherwise specified. DMF was degassed in 20 L drums and passed through two sequential purification columns (activated alumina; molecular sieves for DMF) under a positive argon atmosphere. Thin layer chromatography (TLC) was performed on SiO<sub>2</sub>-60 F254 aluminum plates with visualization by UV light or staining. Flash column chromatography was performed using Purasil SiO<sub>2</sub>-60, 230–400 mesh from Fisher. <sup>1</sup>H and <sup>13</sup>C NMR spectra were recorded on a Bruker Avance-300 (300 MHz), Bruker Avance DRX-500 (500 MHz spectrometer and are reported in ppm using solvent as an internal standard (CDCl<sub>3</sub> at 7.26 ppm). Data reported as: s = singlet, d = doublet, t = triplet, q = quartet, p = pentet, m = multiplet, b = broad, ap = apparent; coupling constant(s) in Hz; integration.

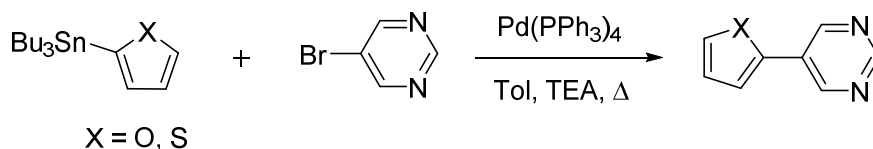

**Scheme S1.** Synthesis of pyrimidine halogen bond acceptors.

## Synthesis of PrmT

To a flame dried round bottom flask (RBF) equipped with a stir bar, 1 equivalence (9.43 mmol, 1.51 g) of 5-bromopyrimidine was added followed by 0.05 equivalence (0.47 mmol, 0.53 g) of Pd(PPh<sub>3</sub>)<sub>4</sub>. The RBF was then put under an inert atmosphere of N<sub>2</sub>. The solid reagents were then dissolved in dry toluene (47 mL) after which 1.1 equivalence (10.37 mmol, 3.30 mL) of 2-(tributylstannyl)thiophene and 1.31 mL of trimethylamine (TEA) were added. The reaction was allowed to run for 12 h at the reflux. After 12 h, the reaction mixture was cooled to room temperature and 100 mL of NaHCO<sub>3</sub> was added to quench the reaction. Ethyl acetate was used to extract the compound and the organic layer was then washed with 100 mL of DI water three times. The organic layer was then separated and dried over Na<sub>2</sub>SO<sub>4</sub>. The organic solvent was then removed by rotary evaporation to afford a yellow solid. The compound was then purified by column chromatography using silica gel as the stationary phase and a 1:1 mixture of hexanes and ethyl acetate (3% TEA) as the mobile phase to afford 1.51 g (99.6% yield) of pure 5-(thiophen-2-yl)pyrimidine pale beige solid. <sup>1</sup>H NMR (300 MHz, CDCl<sub>3</sub>) δ = 9.12, 8.96, 7.44, 7.17.

## Synthesis of PrmF

To a flame dried RBF equipped with a stir bar, 1 equivalence (6.29 mmol, 1.01 g) of 5-bromopyrimidine was added followed by 0.1 equivalence (0.63 mmol, 0.73 g) of Pd(PPh<sub>3</sub>)<sub>4</sub>. The RBF was then put under an inert atmosphere of N<sub>2</sub>. The solid reagents were then dissolved in dry toluene (30 mL) after which 1.2 equivalence (7.55 mmol, 2.38 mL) of 2-(tributylstannyl)furan and 0.5 mL of trimethylamine were added. The reaction was allowed to run for 8 hours at the reflux. After 8 h, the reaction mixture was cooled to room temperature and 100 mL of NaHCO<sub>3</sub> was added to quench the reaction. Ethyl acetate was used to extract the compound and the organic layer was then washed with

100 mL of DI water three times. The organic layer was then separated and dried over  $\text{Na}_2\text{SO}_4$ . The organic solvent was then removed by rotary evaporation to afford a brown solid. The compound was then purified by column chromatography using silica gel as the stationary phase and a 1:1 mixture of hexanes and ethyl acetate as the mobile phase to afford 0.87 g (95% yield) of pure 5-(furan-2-yl)pyrimidine pale yellow solid.  $^1\text{H}$  NMR (300 MHz,  $\text{CDCl}_3$ )  $\delta$  = 8.85, 8.73, 7.32, 6.57, 6.28.

### Synthesis of $(\text{NO}_2)_2\text{BAI}$

The synthesis of the halogen bond donors  $((\text{NO}_2)_2\text{BAI})$  was reported in a previous work.<sup>1</sup>

### NMR Analysis

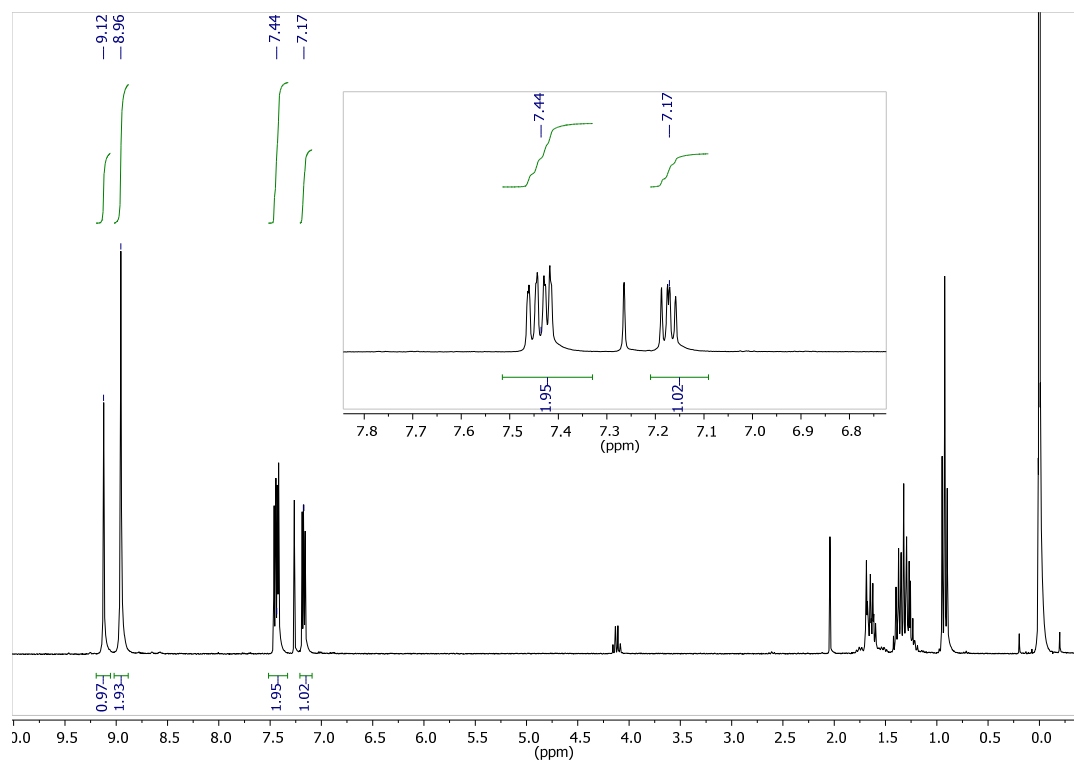

**Figure S1.**  $^1\text{H}$  NMR of 5-(thiophen-2-yl)pyrimidine (ethyl acetate and tributyltin bromide impurities).

<sup>1</sup> Nguyen, S. T.; Rheingold, A. L.; Tschumper, G. S.; Watkins, D.L. Elucidating the Effects of Fluoro and Nitro Substituents on HalogenBond Driven Assemblies of Pyridyl-Capped  $\pi$ -Conjugated Molecules. *Cryst. Growth Des.* 2016, 16, 6648–6653

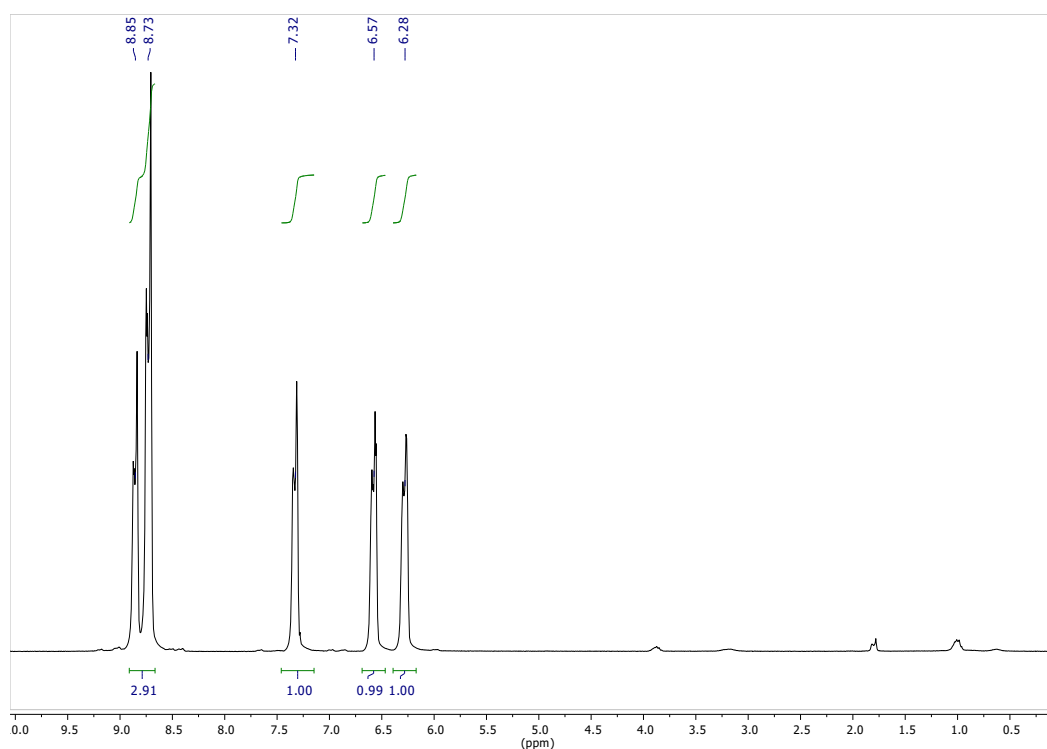

Figure S2.  $^1\text{H}$  NMR of 5-(furan-2-yl)pyrimidine.

### Crystal Data and Structure Refinement

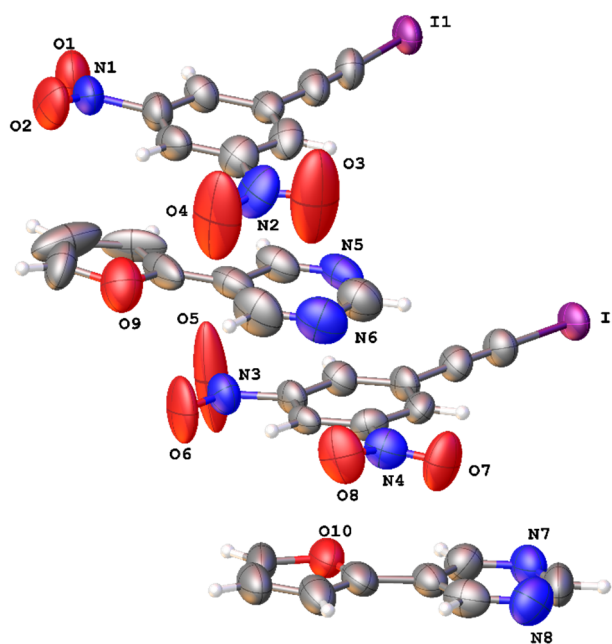

Table S1. Crystal data and structure refinement for dwat21\_0m\_a\_sq. (**PrmF** and (**NO**)<sub>2</sub>**BAI**).

|                     |                                                                |
|---------------------|----------------------------------------------------------------|
| Identification Code | dwat21_0m_a_sq                                                 |
| Empirical formula   | C <sub>16</sub> H <sub>9</sub> I N <sub>4</sub> O <sub>5</sub> |
| Formula weight      | 464.17                                                         |
| Temperature         | 100 K                                                          |
| Wavelength          | 0.71073 Å                                                      |
| Crystal system      | Triclinic                                                      |
| Space group         | P-1                                                            |

|                                         |                                                            |                            |
|-----------------------------------------|------------------------------------------------------------|----------------------------|
| Unit cell dimensions                    | $a = 6.9398(10) \text{ \AA}$                               | $\alpha = 79.340(4)^\circ$ |
|                                         | $b = 16.126(2) \text{ \AA}$                                | $\beta = 80.010(4)^\circ$  |
|                                         | $c = 18.517(3) \text{ \AA}$                                | $\gamma = 89.242(4)^\circ$ |
| Volume                                  | 2005.2(5) $\text{\AA}^3$                                   |                            |
| Z                                       | 4                                                          |                            |
| Density (calculated)                    | 1.538 $\text{Mg/m}^3$                                      |                            |
| Absorption coefficient                  | 1.628 $\text{mm}^{-1}$                                     |                            |
| F(000)                                  | 904                                                        |                            |
| Crystal size                            | $0.3 \times 0.2 \times 0.12 \text{ mm}^3$                  |                            |
| Theta range for data collection         | 1.550 to $26.452^\circ$                                    |                            |
| Index ranges                            | $-8 \leq h \leq 8, -15 \leq k \leq 20, -23 \leq l \leq 23$ |                            |
| Reflections collected                   | 22950                                                      |                            |
| Independent reflections                 | 8062 [R(int) = 0.0516]                                     |                            |
| Completeness to $\theta = 25.242^\circ$ | 98.9%                                                      |                            |
| Absorption correction                   | Semi-empirical from equivalents                            |                            |
| Max. and min. transmission              | 0.7454 and 0.5187                                          |                            |
| Refinement method                       | Full-matrix least-squares on $F^2$                         |                            |
| Data / restraints / parameters          | 8062/0/469                                                 |                            |
| Goodness-of-fit on $F^2$                | 1.043                                                      |                            |
| Final R indices [ $I > 2\sigma(I)$ ]    | R1 = 0.0484, wR2 = 0.1119                                  |                            |
| R indices (all data)                    | R1 = 0.0672, wR2 = 0.1220                                  |                            |
| Extinction coefficient                  | n/a                                                        |                            |
| Largest diff. peak and hole             | 2.026 and $-1.860 \text{ e.\AA}^{-3}$                      |                            |
| Squeeze                                 | 151e/uc; two furanylpurimidine                             |                            |

**Table S2.** Atomic coordinates ( $\times 10^4$ ) and equivalent isotropic displacement parameters ( $\text{\AA}^2 \times 10^3$ ) for dwt21\_0m\_a\_sq.  $U(\text{eq})$  is defined as one third of the trace of the orthogonalized  $U^{\text{ij}}$  tensor.

|       | <i>x</i> | <i>y</i> | <i>z</i> | <i>U</i> (eq) |
|-------|----------|----------|----------|---------------|
| I(2)  | 4554(1)  | 6701(1)  | 197(1)   | 23(1)         |
| I(1)  | 413(1)   | 1758(1)  | 78(1)    | 23(1)         |
| O(10) | 10904(5) | 6773(2)  | 3171(2)  | 32(1)         |
| O(7)  | 5646(7)  | 8646(2)  | 3544(2)  | 39(1)         |
| O(8)  | 5728(6)  | 7904(3)  | 4639(2)  | 40(1)         |
| O(1)  | 1968(6)  | −67(2)   | 3945(2)  | 36(1)         |
| O(2)  | 1744(7)  | 641(3)   | 4846(2)  | 41(1)         |
| O(6)  | 7237(7)  | 4956(3)  | 4851(2)  | 45(1)         |
| O(9)  | 6773(6)  | 1941(3)  | 3760(2)  | 40(1)         |
| N(3)  | 6990(7)  | 4960(3)  | 4219(2)  | 26(1)         |
| N(4)  | 5751(7)  | 7974(3)  | 3962(2)  | 27(1)         |
| N(5)  | 6063(6)  | 3278(3)  | 1258(2)  | 28(1)         |
| N(1)  | 1822(7)  | 587(3)   | 4185(2)  | 29(1)         |
| N(7)  | 10064(7) | 8584(3)  | 1327(2)  | 28(1)         |
| N(2)  | 1997(8)  | 3678(3)  | 3615(3)  | 36(1)         |
| C(14) | 6333(7)  | 6460(3)  | 4097(3)  | 18(1)         |
| C(9)  | 5036(8)  | 6627(3)  | 1253(3)  | 23(1)         |
| N(8)  | 9809(7)  | 9641(3)  | 2081(3)  | 35(1)         |
| C(15) | 5913(7)  | 7201(3)  | 3648(3)  | 20(1)         |
| C(13) | 6483(7)  | 5749(3)  | 3766(3)  | 19(1)         |
| C(11) | 5729(7)  | 6521(3)  | 2617(3)  | 20(1)         |
| C(16) | 5626(7)  | 7252(3)  | 2917(3)  | 20(1)         |
| C(1)  | 870(8)   | 1962(3)  | 1083(3)  | 23(1)         |
| N(6)  | 6341(8)  | 4136(3)  | 2149(3)  | 38(1)         |

|       |          |         |         |       |
|-------|----------|---------|---------|-------|
| C(29) | 10381(8) | 8207(3) | 2605(3) | 24(1) |
| C(4)  | 1523(7)  | 1345(3) | 2937(3) | 22(1) |
| C(10) | 5348(7)  | 6560(3) | 1878(3) | 22(1) |
| C(3)  | 1400(7)  | 2099(3) | 2424(3) | 21(1) |
| C(30) | 10339(8) | 7997(3) | 1913(3) | 27(1) |
| C(27) | 10852(8) | 7652(4) | 3958(3) | 32(1) |
| C(2)  | 1125(8)  | 2052(3) | 1686(3) | 24(1) |
| C(5)  | 1755(8)  | 1392(3) | 3651(3) | 24(1) |
| O(3)  | 1654(11) | 4320(3) | 3209(3) | 87(2) |
| C(21) | 6551(8)  | 2628(4) | 2479(3) | 26(1) |
| O(4)  | 2503(10) | 3688(3) | 4195(3) | 79(2) |
| C(12) | 6176(7)  | 5755(3) | 3044(3) | 21(1) |
| O(5)  | 7200(11) | 4339(3) | 3943(3) | 93(2) |
| C(7)  | 1795(8)  | 2866(3) | 3381(3) | 27(1) |
| C(8)  | 1533(8)  | 2870(3) | 2655(3) | 25(1) |
| C(26) | 11180(8) | 6829(4) | 4338(3) | 34(1) |
| C(22) | 6297(8)  | 2583(4) | 1757(3) | 26(1) |
| C(6)  | 1896(8)  | 2135(3) | 3893(3) | 26(1) |
| C(20) | 6703(8)  | 1872(4) | 3037(3) | 34(1) |
| C(28) | 10694(8) | 7593(4) | 3253(3) | 28(1) |
| C(32) | 10081(8) | 9042(4) | 2655(3) | 29(1) |
| C(19) | 6720(8)  | 1091(4) | 2958(3) | 36(2) |
| C(25) | 11211(8) | 6322(4) | 3851(3) | 36(2) |
| C(17) | 6831(8)  | 1117(3) | 4147(3) | 33(1) |
| C(31) | 9820(8)  | 9372(3) | 1443(3) | 31(1) |
| C(23) | 6081(9)  | 4016(4) | 1486(3) | 34(1) |
| C(24) | 6584(9)  | 3433(4) | 2640(3) | 38(2) |
| C(18) | 6815(9)  | 591(4)  | 3680(4) | 52(2) |

Table S3. Bond lengths [Å] and angles [°] for dwat21\_0m\_a\_sq.

| Bond lengths |          | Angles            |          |
|--------------|----------|-------------------|----------|
| I(2)–C(9)    | 2.023(5) | C(28)–O(10)–C(25) | 106.5(5) |
| I(1)–C(1)    | 2.026(5) | C(20)–O(9)–C(17)  | 105.6(5) |
| O(10)–C(28)  | 1.363(7) | O(6)–N(3)–C(13)   | 119.3(4) |
| O(10)–C(25)  | 1.382(6) | O(5)–N(3)–O(6)    | 121.9(5) |
| O(7)–N(4)    | 1.218(6) | O(5)–N(3)–C(13)   | 118.7(4) |
| O(8)–N(4)    | 1.235(5) | O(7)–N(4)–O(8)    | 123.9(4) |
| O(1)–N(1)    | 1.215(6) | O(7)–N(4)–C(15)   | 118.5(4) |
| O(2)–N(1)    | 1.234(6) | O(8)–N(4)–C(15)   | 117.6(4) |
| O(6)–N(3)    | 1.211(5) | C(23)–N(5)–C(22)  | 116.8(5) |
| O(9)–C(20)   | 1.372(6) | O(1)–N(1)–O(2)    | 125.1(5) |
| O(9)–C(17)   | 1.392(6) | O(1)–N(1)–C(5)    | 118.4(4) |
| N(3)–C(13)   | 1.462(6) | O(2)–N(1)–C(5)    | 116.5(5) |
| N(3)–O(5)    | 1.202(6) | C(31)–N(7)–C(30)  | 116.7(5) |
| N(4)–C(15)   | 1.465(6) | O(3)–N(2)–C(7)    | 118.9(5) |
| N(5)–C(22)   | 1.341(7) | O(4)–N(2)–O(3)    | 121.8(5) |
| N(5)–C(23)   | 1.336(7) | O(4)–N(2)–C(7)    | 119.4(5) |
| N(1)–C(5)    | 1.486(6) | C(15)–C(14)–H(14) | 122.2    |
| N(7)–C(30)   | 1.341(7) | C(15)–C(14)–C(13) | 115.6(4) |
| N(7)–C(31)   | 1.330(7) | C(13)–C(14)–H(14) | 122.2    |
| N(2)–O(3)    | 1.209(6) | C(10)–C(9)–I(2)   | 178.0(5) |
| N(2)–O(4)    | 1.189(6) | C(31)–N(8)–C(32)  | 114.9(5) |

|             |          |                   |          |
|-------------|----------|-------------------|----------|
| N(2)–C(7)   | 1.470(7) | C(14)–C(15)–N(4)  | 118.2(4) |
| C(14)–H(14) | 0.9500   | C(14)–C(15)–C(16) | 123.6(4) |
| C(14)–C(15) | 1.382(7) | C(16)–C(15)–N(4)  | 118.2(4) |
| C(14)–C(13) | 1.391(7) | C(14)–C(13)–N(3)  | 116.9(4) |
| C(9)–C(10)  | 1.199(7) | C(12)–C(13)–N(3)  | 119.5(4) |
| N(8)–C(32)  | 1.336(7) | C(12)–C(13)–C(14) | 123.6(4) |
| N(8)–C(31)  | 1.330(7) | C(16)–C(11)–C(10) | 119.3(4) |
| C(15)–C(16) | 1.389(7) | C(16)–C(11)–C(12) | 119.8(4) |
| C(13)–C(12) | 1.390(6) | C(12)–C(11)–C(10) | 120.9(4) |
| C(11)–C(16) | 1.390(7) | C(15)–C(16)–C(11) | 119.0(4) |
| C(11)–C(10) | 1.427(6) | C(15)–C(16)–H(16) | 120.5    |
| C(11)–C(12) | 1.400(7) | C(11)–C(16)–H(16) | 120.5    |
| C(16)–H(16) | 0.9500   | C(2)–C(1)–I(1)    | 177.6(5) |
| C(1)–C(2)   | 1.195(7) | C(23)–N(6)–C(24)  | 115.5(5) |
| N(6)–C(23)  | 1.322(7) | C(30)–C(29)–C(28) | 123.1(5) |
| N(6)–C(24)  | 1.343(8) | C(32)–C(29)–C(30) | 116.3(5) |
| C(29)–C(30) | 1.390(7) | C(32)–C(29)–C(28) | 120.6(5) |
| C(29)–C(28) | 1.453(7) | C(3)–C(4)–H(4)    | 120.5    |
| C(29)–C(32) | 1.376(8) | C(5)–C(4)–H(4)    | 120.5    |
| C(4)–H(4)   | 0.9500   | C(5)–C(4)–C(3)    | 118.9(5) |
| C(4)–C(3)   | 1.410(7) | C(9)–C(10)–C(11)  | 177.5(5) |
| C(4)–C(5)   | 1.374(7) | C(4)–C(3)–C(2)    | 119.1(5) |
| C(3)–C(2)   | 1.427(7) | C(8)–C(3)–C(4)    | 118.9(5) |
| C(3)–C(8)   | 1.397(7) | C(8)–C(3)–C(2)    | 122.0(5) |
| C(30)–H(30) | 0.9500   | N(7)–C(30)–C(29)  | 121.3(5) |
| C(27)–H(27) | 0.9500   | N(7)–C(30)–H(30)  | 119.3    |
| C(27)–C(26) | 1.419(8) | C(29)–C(30)–H(30) | 119.3    |
| C(27)–C(28) | 1.349(8) | C(26)–C(27)–H(27) | 126.3    |
| C(5)–C(6)   | 1.366(7) | C(28)–C(27)–H(27) | 126.3    |
| C(21)–C(22) | 1.393(7) | C(28)–C(27)–C(26) | 107.4(6) |
| C(21)–C(20) | 1.459(8) | C(1)–C(2)–C(3)    | 176.1(6) |
| C(21)–C(24) | 1.387(8) | C(4)–C(5)–N(1)    | 117.7(5) |
| C(12)–H(12) | 0.9500   | C(6)–C(5)–N(1)    | 118.7(5) |
| C(7)–C(8)   | 1.386(7) | C(6)–C(5)–C(4)    | 123.6(5) |
| C(7)–C(6)   | 1.379(7) | C(22)–C(21)–C(20) | 122.0(5) |
| C(8)–H(8)   | 0.9500   | C(24)–C(21)–C(22) | 115.6(5) |
| C(26)–H(26) | 0.9500   | C(24)–C(21)–C(20) | 122.3(5) |
| C(26)–C(25) | 1.322(9) | C(13)–C(12)–C(11) | 118.4(5) |
| C(22)–H(22) | 0.9500   | C(13)–C(12)–H(12) | 120.8    |
| C(6)–H(6)   | 0.9500   | C(11)–C(12)–H(12) | 120.8    |
| C(20)–C(19) | 1.294(8) | C(8)–C(7)–N(2)    | 118.6(5) |
| C(32)–H(32) | 0.9500   | C(6)–C(7)–N(2)    | 118.2(5) |
| C(19)–H(19) | 0.9500   | C(6)–C(7)–C(8)    | 123.2(5) |
| C(19)–C(18) | 1.440(9) | C(3)–C(8)–H(8)    | 120.6    |
| C(25)–H(25) | 0.9500   | C(7)–C(8)–C(3)    | 118.8(5) |
| C(17)–H(17) | 0.9500   | C(7)–C(8)–H(8)    | 120.6    |
| C(17)–C(18) | 1.318(9) | C(27)–C(26)–H(26) | 126.7    |
| C(31)–H(31) | 0.9500   | C(25)–C(26)–C(27) | 106.6(5) |
| C(23)–H(23) | 0.9500   | C(25)–C(26)–H(26) | 126.7    |
| C(24)–H(24) | 0.9500   | N(5)–C(22)–C(21)  | 121.8(5) |
| C(18)–H(18) | 0.9500   | N(5)–C(22)–H(22)  | 119.1    |
|             |          | C(21)–C(22)–H(22) | 119.1    |

|                   |          |
|-------------------|----------|
| C(5)–C(6)–C(7)    | 116.7(5) |
| C(5)–C(6)–H(6)    | 121.7    |
| C(7)–C(6)–H(6)    | 121.7    |
| O(9)–C(20)–C(21)  | 120.1(5) |
| C(19)–C(20)–O(9)  | 111.4(5) |
| C(19)–C(20)–C(21) | 128.5(5) |
| O(10)–C(28)–C(29) | 117.5(5) |
| C(27)–C(28)–O(10) | 109.1(5) |
| C(27)–C(28)–C(29) | 133.4(6) |
| N(8)–C(32)–C(29)  | 123.7(5) |
| N(8)–C(32)–H(32)  | 118.1    |
| C(29)–C(32)–H(32) | 118.1    |
| C(20)–C(19)–H(19) | 126.7    |
| C(20)–C(19)–C(18) | 106.5(5) |
| C(18)–C(19)–H(19) | 126.7    |
| O(10)–C(25)–H(25) | 124.8    |
| C(26)–C(25)–O(10) | 110.4(5) |
| C(26)–C(25)–H(25) | 124.8    |
| O(9)–C(17)–H(17)  | 125.5    |
| C(18)–C(17)–O(9)  | 109.0(6) |
| C(18)–C(17)–H(17) | 125.5    |
| N(7)–C(31)–H(31)  | 116.5    |
| N(8)–C(31)–N(7)   | 127.0(5) |
| N(8)–C(31)–H(31)  | 116.5    |
| N(5)–C(23)–H(23)  | 116.6    |
| N(6)–C(23)–N(5)   | 126.8(6) |
| N(6)–C(23)–H(23)  | 116.6    |
| N(6)–C(24)–C(21)  | 123.5(5) |
| N(6)–C(24)–H(24)  | 118.2    |
| C(21)–C(24)–H(24) | 118.2    |
| C(19)–C(18)–H(18) | 126.3    |
| C(17)–C(18)–C(19) | 107.4(6) |
| C(17)–C(18)–H(18) | 126.3    |

Symmetry transformations used to generate equivalent atoms:

**Table S4.** Anisotropic displacement parameters ( $\text{\AA}^2 \times 10^3$ ) for dwat21\_0m\_a\_sq. The anisotropic displacement factor exponent takes the form:  $-2^2 [h^2 a^{*2} U^{11} + \dots + 2 h k a^* b^* U^{12}]$ .

|       | U <sup>11</sup> | U <sup>22</sup> | U <sup>33</sup> | U <sup>23</sup> | U <sup>13</sup> | U <sup>12</sup> |
|-------|-----------------|-----------------|-----------------|-----------------|-----------------|-----------------|
| I(2)  | 26(1)           | 31(1)           | 12(1)           | −3(1)           | −6(1)           | −1(1)           |
| I(1)  | 26(1)           | 29(1)           | 13(1)           | 0(1)            | −6(1)           | 1(1)            |
| O(10) | 27(2)           | 38(2)           | 26(2)           | 5(2)            | −5(2)           | −2(2)           |
| O(7)  | 69(3)           | 19(2)           | 29(2)           | −4(2)           | −9(2)           | 2(2)            |
| O(8)  | 58(3)           | 43(2)           | 26(2)           | −18(2)          | −14(2)          | 10(2)           |
| O(1)  | 47(3)           | 30(2)           | 31(2)           | 1(2)            | −15(2)          | 4(2)            |
| O(2)  | 58(3)           | 46(3)           | 18(2)           | 3(2)            | −16(2)          | −7(2)           |
| O(6)  | 79(3)           | 42(2)           | 17(2)           | −2(2)           | −22(2)          | 13(2)           |
| O(9)  | 49(3)           | 43(3)           | 27(2)           | −4(2)           | −6(2)           | 7(2)            |
| N(3)  | 31(3)           | 30(3)           | 19(2)           | −2(2)           | −9(2)           | 1(2)            |
| N(4)  | 29(3)           | 32(3)           | 23(2)           | −12(2)          | −3(2)           | 2(2)            |
| N(5)  | 20(3)           | 49(3)           | 19(2)           | −11(2)          | −4(2)           | 2(2)            |
| N(1)  | 30(3)           | 34(3)           | 22(2)           | 6(2)            | −11(2)          | −3(2)           |
| N(7)  | 30(3)           | 35(3)           | 19(2)           | −3(2)           | −6(2)           | 0(2)            |

|       |        |       |       |        |        |        |
|-------|--------|-------|-------|--------|--------|--------|
| N(2)  | 53(4)  | 37(3) | 17(2) | −6(2)  | 2(2)   | −3(2)  |
| C(14) | 14(3)  | 28(3) | 11(2) | −4(2)  | −3(2)  | −2(2)  |
| C(9)  | 27(3)  | 28(3) | 16(3) | −4(2)  | −5(2)  | −1(2)  |
| N(8)  | 41(3)  | 28(3) | 35(3) | −6(2)  | −2(2)  | 3(2)   |
| C(15) | 21(3)  | 21(3) | 19(2) | −9(2)  | −2(2)  | −2(2)  |
| C(13) | 22(3)  | 25(3) | 12(2) | −3(2)  | −6(2)  | 0(2)   |
| C(11) | 22(3)  | 26(3) | 11(2) | −2(2)  | −5(2)  | 0(2)   |
| C(16) | 18(3)  | 24(3) | 16(2) | 1(2)   | −1(2)  | −2(2)  |
| C(1)  | 27(3)  | 24(3) | 16(3) | 0(2)   | −4(2)  | 4(2)   |
| N(6)  | 42(3)  | 44(3) | 36(3) | −19(2) | −11(2) | 0(2)   |
| C(29) | 19(3)  | 33(3) | 20(3) | −2(2)  | −3(2)  | 0(2)   |
| C(4)  | 22(3)  | 28(3) | 17(2) | −6(2)  | −5(2)  | 4(2)   |
| C(10) | 21(3)  | 27(3) | 15(2) | −2(2)  | −1(2)  | 1(2)   |
| C(3)  | 17(3)  | 30(3) | 14(2) | −1(2)  | −1(2)  | −1(2)  |
| C(30) | 28(3)  | 27(3) | 26(3) | −3(2)  | −4(2)  | −1(2)  |
| C(27) | 21(3)  | 46(4) | 25(3) | 4(3)   | −4(2)  | 3(3)   |
| C(2)  | 20(3)  | 31(3) | 18(3) | 1(2)   | −2(2)  | 3(2)   |
| C(5)  | 25(3)  | 27(3) | 19(3) | 1(2)   | −6(2)  | 2(2)   |
| O(3)  | 184(7) | 34(3) | 56(3) | −12(3) | −53(4) | 7(3)   |
| C(21) | 17(3)  | 44(3) | 19(3) | −10(2) | −4(2)  | 0(2)   |
| O(4)  | 169(6) | 48(3) | 38(3) | −17(2) | −55(4) | −1(3)  |
| C(12) | 20(3)  | 27(3) | 17(2) | −6(2)  | −3(2)  | 2(2)   |
| O(5)  | 226(8) | 32(3) | 50(3) | −25(2) | −85(4) | 50(4)  |
| C(7)  | 29(3)  | 33(3) | 19(3) | −8(2)  | 0(2)   | 2(2)   |
| C(8)  | 25(3)  | 31(3) | 16(3) | −2(2)  | 2(2)   | 4(2)   |
| C(26) | 28(3)  | 46(4) | 24(3) | 6(3)   | −7(2)  | −1(3)  |
| C(22) | 21(3)  | 43(3) | 19(3) | −14(2) | −4(2)  | 2(2)   |
| C(6)  | 24(3)  | 37(3) | 16(3) | −1(2)  | −6(2)  | −5(2)  |
| C(20) | 22(3)  | 65(4) | 13(3) | −2(3)  | −5(2)  | −4(3)  |
| C(28) | 19(3)  | 38(3) | 27(3) | 0(2)   | −6(2)  | 0(2)   |
| C(32) | 26(3)  | 40(3) | 22(3) | −14(2) | −1(2)  | −2(2)  |
| C(19) | 25(3)  | 60(4) | 33(3) | −38(3) | 4(3)   | −13(3) |
| C(25) | 21(3)  | 43(4) | 34(3) | 18(3)  | −6(3)  | 0(3)   |
| C(17) | 36(4)  | 31(3) | 24(3) | 7(2)   | 1(3)   | 4(3)   |
| C(31) | 29(3)  | 32(3) | 27(3) | 8(2)   | −6(2)  | 4(2)   |
| C(23) | 34(4)  | 40(3) | 30(3) | −11(3) | −9(3)  | 1(3)   |
| C(24) | 43(4)  | 53(4) | 25(3) | −18(3) | −11(3) | 3(3)   |
| C(18) | 34(4)  | 35(4) | 84(6) | −22(4) | 13(4)  | −12(3) |

**Table S5.** Hydrogen coordinates ( $\times 10^4$ ) and isotropic displacement parameters ( $\text{\AA}^2 \times 10^3$ ) for dwat21\_0m\_a\_sq.

|       | <i>x</i> | <i>y</i> | <i>z</i> | <i>U(eq)</i> |
|-------|----------|----------|----------|--------------|
| H(14) | 6508     | 6438     | 4598     | 21           |
| H(16) | 5364     | 7778     | 2628     | 24           |
| H(4)  | 1447     | 812      | 2793     | 26           |
| H(30) | 10509    | 7427     | 1854     | 33           |
| H(27) | 10760    | 8153     | 4162     | 39           |
| H(12) | 6266     | 5251     | 2844     | 25           |
| H(8)  | 1446     | 3387     | 2321     | 30           |
| H(26) | 11345    | 6673     | 4844     | 41           |

|       |       |      |      |    |
|-------|-------|------|------|----|
| H(22) | 6290  | 2047 | 1615 | 32 |
| H(6)  | 2055  | 2148 | 4391 | 31 |
| H(32) | 10067 | 9201 | 3125 | 35 |
| H(19) | 6678  | 887  | 2511 | 43 |
| H(25) | 11416 | 5731 | 3954 | 43 |
| H(17) | 6875  | 958  | 4664 | 39 |
| H(31) | 9633  | 9786 | 1026 | 37 |
| H(23) | 5887  | 4505 | 1134 | 40 |
| H(24) | 6789  | 3491 | 3122 | 46 |
| H(18) | 6859  | −7   | 3799 | 63 |

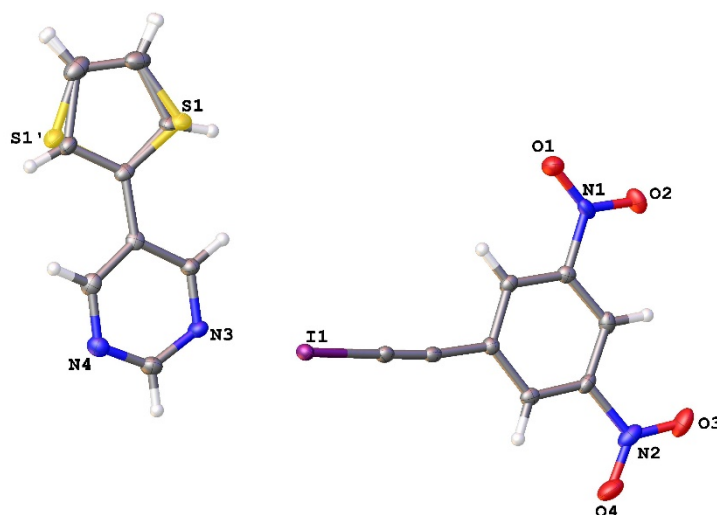

**Table S6.** Crystal data and structure refinement for dwat16\_0m\_a. (**PrmT** and **(NO<sub>2</sub>)<sub>2</sub>BAI**).

|                                 |                                                                                             |                           |
|---------------------------------|---------------------------------------------------------------------------------------------|---------------------------|
| <b>Identification Code</b>      | SN121616-TH                                                                                 |                           |
| Empirical formula               | C <sub>32</sub> H <sub>18</sub> I <sub>2</sub> N <sub>8</sub> O <sub>8</sub> S <sub>2</sub> |                           |
| Formula weight                  | 960.46                                                                                      |                           |
| Temperature                     | 100.0 K                                                                                     |                           |
| Wavelength                      | 0.71073 Å                                                                                   |                           |
| Crystal system                  | Monoclinic                                                                                  |                           |
| Space group                     | P 21/n                                                                                      |                           |
| Unit cell dimensions            | $a = 9.2195(6)$ Å                                                                           | $\alpha = 90^\circ$       |
|                                 | $b = 5.7344(4)$ Å                                                                           | $\beta = 93.209(3)^\circ$ |
|                                 | $c = 32.1204(16)$ Å                                                                         | $\gamma = 90^\circ$       |
| Volume                          | 1695.49(18) Å <sup>3</sup>                                                                  |                           |
| Z                               | 2                                                                                           |                           |
| Density (calculated)            | 1.881 Mg/m <sup>3</sup>                                                                     |                           |
| Absorption coefficient          | 2.043 mm <sup>−1</sup>                                                                      |                           |
| F(000)                          | 936                                                                                         |                           |
| Crystal size                    | 0.31 × 0.29 × 0.08 mm <sup>3</sup>                                                          |                           |
| Theta range for data collection | 2.267 to 28.339°                                                                            |                           |
| Index ranges                    | −12 ≤ $h$ ≤ 12, −7 ≤ $k$ ≤ 5, −42 ≤ $l$ ≤ 42                                                |                           |
| Reflections collected           | 14426                                                                                       |                           |
| Independent reflections         | 4232 [R(int) = 0.0722]                                                                      |                           |
| Completeness to theta = 25.000° | 99.9%                                                                                       |                           |
| Absorption correction           | Semi-empirical from equivalents                                                             |                           |
| Max. and min. transmission      | 0.2627 and 0.1977                                                                           |                           |
| Refinement method               | Full-matrix least-squares on F <sup>2</sup>                                                 |                           |

|                                   |                                    |
|-----------------------------------|------------------------------------|
| Data / restraints / parameters    | 4232/30/242                        |
| Goodness-of-fit on F <sup>2</sup> | 1.164                              |
| Final R indices [I > 2sigma(I)]   | R1 = 0.0438, wR2 = 0.1022          |
| R indices (all data)              | R1 = 0.0470, wR2 = 0.1040          |
| Extinction coefficient            | n/a                                |
| Largest diff. peak and hole       | 0.650 and −0.990 e.Å <sup>−3</sup> |

**Table S7.** Atomic coordinates ( $\times 10^4$ ) and equivalent isotropic displacement parameters ( $\text{\AA}^2 \times 10^3$ ) for dwat16\_0m\_a. U(eq) is defined as one third of the trace of the orthogonalized  $U^{ij}$  tensor.

|        | x        | y         | z       | U(eq) |
|--------|----------|-----------|---------|-------|
| I(1)   | 8317(1)  | 2291(1)   | 5179(1) | 16(1) |
| S(1')  | 6172(3)  | −2085(5)  | 7255(1) | 21(1) |
| O(2)   | 4257(3)  | 14818(5)  | 4030(1) | 25(1) |
| O(4)   | 8878(3)  | 9484(5)   | 3079(1) | 32(1) |
| O(1)   | 4173(3)  | 12806(5)  | 4601(1) | 28(1) |
| O(3)   | 7742(4)  | 12817(5)  | 3032(1) | 32(1) |
| N(3)   | 8766(3)  | −573(6)   | 5890(1) | 18(1) |
| N(4)   | 9385(3)  | −3942(6)  | 6297(1) | 21(1) |
| N(2)   | 8038(3)  | 10946(6)  | 3205(1) | 24(1) |
| N(1)   | 4616(3)  | 13157(6)  | 4257(1) | 19(1) |
| C(12)  | 7914(4)  | 176(6)    | 6187(1) | 17(1) |
| C(1)   | 7830(3)  | 4667(6)   | 4729(1) | 16(1) |
| C(11)  | 7726(4)  | −1102(6)  | 6552(1) | 15(1) |
| C(10)  | 8528(4)  | −3172(7)  | 6588(1) | 20(1) |
| C(7)   | 5688(3)  | 11503(6)  | 4097(1) | 16(1) |
| C(13)  | 6715(4)  | −356(6)   | 6863(1) | 18(1) |
| C(9)   | 9450(4)  | −2613(6)  | 5960(1) | 21(1) |
| C(4)   | 7775(4)  | 8467(7)   | 3826(1) | 16(1) |
| C(5)   | 7350(4)  | 10439(6)  | 3602(1) | 18(1) |
| C(3)   | 7125(4)  | 8045(6)   | 4203(1) | 15(1) |
| C(6)   | 6313(4)  | 12005(6)  | 3726(1) | 18(1) |
| C(16)  | 4964(4)  | 1798(8)   | 7230(1) | 28(1) |
| C(8)   | 6053(3)  | 9566(6)   | 4338(1) | 16(1) |
| C(2)   | 7552(3)  | 6126(6)   | 4471(1) | 16(1) |
| C(15)  | 5077(4)  | −259(8)   | 7426(1) | 30(1) |
| C(14') | 5930(30) | 1830(30)  | 6861(9) | 21(1) |
| C(14)  | 6340(20) | −1750(40) | 7192(6) | 21(1) |
| S(1)   | 5965(10) | 2244(9)   | 6849(3) | 21(1) |

**Table S8.** Bond lengths [ $\text{\AA}$ ] and angles [ $^\circ$ ] for dwat16\_0m\_a.

| Bond lengths |          | Angles            |          |
|--------------|----------|-------------------|----------|
| I(1)–C(1)    | 2.019(3) | C(15)–S(1')–C(13) | 95.2(2)  |
| S(1')–C(13)  | 1.700(4) | C(12)–N(3)–C(9)   | 116.7(3) |
| S(1')–C(15)  | 1.574(5) | C(9)–N(4)–C(10)   | 115.9(3) |
| O(2)–N(1)    | 1.234(4) | O(4)–N(2)–O(3)    | 125.2(3) |
| O(4)–N(2)    | 1.225(4) | O(4)–N(2)–C(5)    | 117.2(3) |
| O(1)–N(1)    | 1.218(4) | O(3)–N(2)–C(5)    | 117.6(3) |
| O(3)–N(2)    | 1.232(4) | O(2)–N(1)–C(7)    | 116.8(3) |
| N(3)–C(12)   | 1.340(4) | O(1)–N(1)–O(2)    | 124.9(3) |
| N(3)–C(9)    | 1.341(5) | O(1)–N(1)–C(7)    | 118.2(3) |
| N(4)–C(10)   | 1.333(5) | N(3)–C(12)–H(12)  | 118.9    |

|               |           |                     |           |
|---------------|-----------|---------------------|-----------|
| N(4)–C(9)     | 1.329(5)  | N(3)–C(12)–C(11)    | 122.2(3)  |
| N(2)–C(5)     | 1.483(4)  | C(11)–C(12)–H(12)   | 118.9     |
| N(1)–C(7)     | 1.482(4)  | C(2)–C(1)–I(1)      | 177.9(3)  |
| C(12)–H(12)   | 0.9500    | C(12)–C(11)–C(13)   | 122.0(3)  |
| C(12)–C(11)   | 1.403(5)  | C(10)–C(11)–C(12)   | 115.0(3)  |
| C(1)–C(2)     | 1.194(5)  | C(10)–C(11)–C(13)   | 122.9(3)  |
| C(11)–C(10)   | 1.400(5)  | N(4)–C(10)–C(11)    | 123.6(3)  |
| C(11)–C(13)   | 1.467(4)  | N(4)–C(10)–H(10)    | 118.2     |
| C(10)–H(10)   | 0.9500    | C(11)–C(10)–H(10)   | 118.2     |
| C(7)–C(6)     | 1.383(5)  | C(6)–C(7)–N(1)      | 118.9(3)  |
| C(7)–C(8)     | 1.384(5)  | C(6)–C(7)–C(8)      | 123.3(3)  |
| C(13)–C(14')  | 1.45(2)   | C(8)–C(7)–N(1)      | 117.8(3)  |
| C(13)–C(14)   | 1.386(17) | C(11)–C(13)–S(1')   | 123.9(3)  |
| C(13)–S(1)    | 1.643(8)  | C(11)–C(13)–S(1)    | 121.9(4)  |
| C(9)–H(9)     | 0.9500    | C(14')–C(13)–S(1')  | 109.9(10) |
| C(4)–H(4)     | 0.9500    | C(14')–C(13)–C(11)  | 125.9(11) |
| C(4)–C(5)     | 1.386(5)  | C(14)–C(13)–C(11)   | 123.2(10) |
| C(4)–C(3)     | 1.402(4)  | C(14)–C(13)–S(1)    | 114.9(10) |
| C(5)–C(6)     | 1.386(5)  | N(3)–C(9)–H(9)      | 116.8     |
| C(3)–C(8)     | 1.404(5)  | N(4)–C(9)–N(3)      | 126.5(3)  |
| C(3)–C(2)     | 1.438(5)  | N(4)–C(9)–H(9)      | 116.8     |
| C(6)–H(6)     | 0.9500    | C(5)–C(4)–H(4)      | 121.0     |
| C(16)–H(16)   | 0.9500    | C(5)–C(4)–C(3)      | 118.0(3)  |
| C(16)–H(16A)  | 0.9500    | C(3)–C(4)–H(4)      | 121.0     |
| C(16)–C(15)   | 1.339(6)  | C(4)–C(5)–N(2)      | 119.0(3)  |
| C(16)–C(14')  | 1.52(3)   | C(4)–C(5)–C(6)      | 123.9(3)  |
| C(16)–S(1)    | 1.593(9)  | C(6)–C(5)–N(2)      | 117.1(3)  |
| C(8)–H(8)     | 0.9500    | C(4)–C(3)–C(8)      | 120.0(3)  |
| C(15)–H(15)   | 0.9500    | C(4)–C(3)–C(2)      | 122.2(3)  |
| C(15)–H(15A)  | 0.9500    | C(8)–C(3)–C(2)      | 117.7(3)  |
| C(15)–C(14)   | 1.66(2)   | C(7)–C(6)–C(5)      | 116.2(3)  |
| C(14')–H(14') | 0.9500    | C(7)–C(6)–H(6)      | 121.9     |
| C(14)–H(14)   | 0.9500    | C(5)–C(6)–H(6)      | 121.9     |
|               |           | C(15)–C(16)–H(16)   | 125.0     |
|               |           | C(15)–C(16)–H(16A)  | 121.0     |
|               |           | C(15)–C(16)–C(14')  | 110.0(8)  |
|               |           | C(15)–C(16)–S(1)    | 118.0(4)  |
|               |           | C(14')–C(16)–H(16)  | 125.0     |
|               |           | S(1)–C(16)–H(16A)   | 121.0     |
|               |           | C(7)–C(8)–C(3)      | 118.7(3)  |
|               |           | C(7)–C(8)–H(8)      | 120.7     |
|               |           | C(3)–C(8)–H(8)      | 120.7     |
|               |           | C(1)–C(2)–C(3)      | 172.5(4)  |
|               |           | S(1')–C(15)–H(15)   | 121.4     |
|               |           | C(16)–C(15)–S(1')   | 117.2(3)  |
|               |           | C(16)–C(15)–H(15)   | 121.4     |
|               |           | C(16)–C(15)–H(15A)  | 126.9     |
|               |           | C(16)–C(15)–C(14)   | 106.3(7)  |
|               |           | C(14)–C(15)–H(15A)  | 126.9     |
|               |           | C(13)–C(14')–C(16)  | 107.6(14) |
|               |           | C(13)–C(14')–H(14') | 126.2     |
|               |           | C(16)–C(14')–H(14') | 126.2     |

|                   |           |
|-------------------|-----------|
| C(13)–C(14)–C(15) | 105.1(14) |
| C(13)–C(14)–H(14) | 127.4     |
| C(15)–C(14)–H(14) | 127.4     |
| C(16)–S(1)–C(13)  | 95.5(4)   |

Symmetry transformations used to generate equivalent atoms:

**Table S9.** Anisotropic displacement parameters ( $\text{\AA}^2 \times 10^3$ ) for dwat16\_0m\_a. The anisotropic displacement factor exponent takes the form:  $-2^2 [\text{h}^2 \text{a}^* \text{U}^{11} + \dots + 2 \text{h k a}^* \text{b}^* \text{U}^{12}]$ .

|        | U <sup>11</sup> | U <sup>22</sup> | U <sup>33</sup> | U <sup>23</sup> | U <sup>13</sup> | U <sup>12</sup> |
|--------|-----------------|-----------------|-----------------|-----------------|-----------------|-----------------|
| I(1)   | 17(1)           | 15(1)           | 16(1)           | 0(1)            | 2(1)            | 2(1)            |
| S(1')  | 24(1)           | 22(1)           | 18(1)           | 1(1)            | 5(1)            | −2(1)           |
| O(2)   | 24(1)           | 18(1)           | 31(1)           | 4(1)            | −5(1)           | 6(1)            |
| O(4)   | 34(2)           | 40(2)           | 25(1)           | 0(1)            | 13(1)           | −4(1)           |
| O(1)   | 30(2)           | 24(2)           | 32(2)           | 2(1)            | 12(1)           | 5(1)            |
| O(3)   | 34(2)           | 38(2)           | 26(2)           | 13(1)           | 4(1)            | −6(1)           |
| N(3)   | 19(1)           | 22(2)           | 14(1)           | 0(1)            | 4(1)            | 2(1)            |
| N(4)   | 20(1)           | 22(2)           | 22(2)           | −1(1)           | −2(1)           | 4(1)            |
| N(2)   | 21(2)           | 36(2)           | 14(1)           | 1(1)            | 2(1)            | −9(1)           |
| N(1)   | 17(1)           | 12(2)           | 29(2)           | −1(1)           | 0(1)            | 1(1)            |
| C(12)  | 19(2)           | 18(2)           | 15(2)           | −1(1)           | 2(1)            | 1(1)            |
| C(1)   | 13(2)           | 18(2)           | 18(2)           | −1(1)           | 2(1)            | 1(1)            |
| C(11)  | 16(2)           | 17(2)           | 12(1)           | −2(1)           | −4(1)           | −4(1)           |
| C(10)  | 18(2)           | 25(2)           | 17(2)           | 3(1)            | −4(1)           | −1(2)           |
| C(7)   | 13(2)           | 17(2)           | 17(2)           | −2(1)           | −1(1)           | −1(1)           |
| C(13)  | 18(2)           | 22(2)           | 13(1)           | −4(1)           | 1(1)            | −5(1)           |
| C(9)   | 18(2)           | 23(2)           | 23(2)           | −2(1)           | 2(1)            | 2(1)            |
| C(4)   | 14(2)           | 19(2)           | 16(2)           | −3(1)           | 0(1)            | −3(1)           |
| C(5)   | 20(2)           | 21(2)           | 15(2)           | 0(1)            | 3(1)            | −7(1)           |
| C(3)   | 16(2)           | 14(2)           | 15(2)           | −1(1)           | 1(1)            | −1(1)           |
| C(6)   | 16(2)           | 16(2)           | 20(2)           | 3(1)            | −4(1)           | −3(1)           |
| C(16)  | 25(2)           | 31(2)           | 30(2)           | −12(1)          | 8(1)            | −3(2)           |
| C(8)   | 14(2)           | 19(2)           | 15(1)           | 0(1)            | 1(1)            | −3(1)           |
| C(2)   | 13(2)           | 16(2)           | 17(2)           | −4(1)           | 3(1)            | −1(1)           |
| C(15)  | 31(2)           | 39(2)           | 21(2)           | −5(1)           | 5(1)            | −13(2)          |
| C(14') | 24(1)           | 21(2)           | 20(1)           | −5(2)           | 6(1)            | −1(2)           |
| C(14)  | 24(1)           | 22(1)           | 18(1)           | 1(1)            | 5(1)            | −2(1)           |
| S(1)   | 24(1)           | 21(2)           | 20(1)           | −5(2)           | 6(1)            | −1(2)           |

**Table S10.** Hydrogen coordinates ( $\times 10^4$ ) and isotropic displacement parameters ( $\text{\AA}^2 \times 10^3$ ) for dwat16\_0m\_a.

|        | x     | y     | z    | U(eq) |
|--------|-------|-------|------|-------|
| H(12)  | 7421  | 1621  | 6149 | 21    |
| H(10)  | 8456  | −4079 | 6834 | 24    |
| H(9)   | 10038 | −3163 | 5747 | 25    |
| H(4)   | 8484  | 7434  | 3728 | 19    |
| H(6)   | 6048  | 13346 | 3566 | 21    |
| H(16)  | 4369  | 3056  | 7309 | 34    |
| H(16A) | 4306  | 2957  | 7315 | 34    |
| H(8)   | 5588  | 9272  | 4589 | 19    |
| H(15)  | 4520  | −603  | 7658 | 36    |
| H(15A) | 4542  | −762  | 7654 | 36    |

|        |      |       |      |    |
|--------|------|-------|------|----|
| H(14') | 5998 | 3054  | 6664 | 25 |
| H(14)  | 6714 | −3244 | 7266 | 25 |

## Computational Results

**Table S11.** Cartesian coordinates (in Å) of the pyrimidine capped furan XB acceptor (**PrmF**) at the M06-2X/aug-cc-pVTZ level of theory.

|   | <i>x</i>    | <i>y</i>    | <i>z</i>    |
|---|-------------|-------------|-------------|
| C | 3.57825889  | 0.09741977  | 0.04859206  |
| N | 2.89882889  | 1.07808739  | 0.63763415  |
| C | 1.57876550  | 0.98429685  | 0.59747548  |
| C | 1.73873077  | −1.03801133 | −0.60273630 |
| N | 3.06326921  | −0.95777709 | −0.57066286 |
| H | 1.01905192  | 1.78073737  | 1.07595310  |
| H | 4.65848921  | 0.16812917  | 0.07787501  |
| H | 1.30774374  | −1.89499573 | −1.10551911 |
| C | −0.53083405 | −0.16009989 | −0.05601063 |
| C | −1.52346950 | 0.63341831  | 0.42579255  |
| O | −1.06929135 | −1.23494569 | −0.68663473 |
| C | −2.75310961 | 0.00292178  | 0.06654621  |
| H | −1.39983318 | 1.55352342  | 0.96956850  |
| C | −2.41392934 | −1.12088128 | −0.60333898 |
| H | −3.75085304 | 0.34298100  | 0.27970623  |
| H | −2.98355089 | −1.90787997 | −1.06303176 |
| C | 0.91817881  | −0.07411190 | −0.02198190 |

**Table S12.** Cartesian coordinates (in Å) of the pyrimidine capped thiophene XB acceptor (**PrmT**) at the M06-2X/aug-cc-pVTZ level of theory.

|   | <i>x</i>    | <i>y</i>    | <i>z</i>    |
|---|-------------|-------------|-------------|
| C | 3.63197307  | 0.19973830  | 0.16099702  |
| N | 2.87476650  | 1.24554445  | 0.47683448  |
| C | 1.56556581  | 1.08426914  | 0.34938590  |
| C | 1.89068252  | −1.13136082 | −0.37134679 |
| N | 3.20423443  | −0.98308254 | −0.26560481 |
| H | 0.94224721  | 1.94221447  | 0.57690176  |
| H | 4.70314799  | 0.32576068  | 0.25832266  |
| H | 1.53419673  | −2.10231380 | −0.70051310 |
| C | −0.45930315 | −0.27190863 | −0.17879812 |
| C | −1.43041961 | 0.37986915  | 0.52783548  |
| S | −1.16416756 | −1.38028333 | −1.30040210 |
| C | −2.74368323 | −0.01729596 | 0.16680595  |
| H | −1.21022344 | 1.10214653  | 1.30013991  |
| C | −2.75136493 | −0.96470183 | −0.80860520 |
| H | −3.64053767 | 0.37951115  | 0.61704450  |
| H | −3.59950456 | −1.44196497 | −1.26929264 |
| C | 0.98883586  | −0.11332982 | −0.07047787 |

**Table S13.** Cartesian coordinates (in Å) of 1-(iodoethynyl)-3,5-dinitrobenzene (**(NO<sub>2</sub>)<sub>2</sub>BAI**) at the M06-2X/aug-cc-pVTZ level of theory.

|   | <i>x</i>   | <i>y</i>    | <i>z</i>    |
|---|------------|-------------|-------------|
| C | 0.00000000 | −1.20532835 | 1.34032941  |
| C | 0.00000000 | −1.17312996 | 2.72030996  |
| C | 0.00000000 | 0.00000000  | 3.44833842  |
| C | 0.00000000 | 1.17312996  | 2.72030996  |
| C | 0.00000000 | 1.20532835  | 1.34032941  |
| C | 0.00000000 | 0.00000000  | 0.63613928  |
| H | 0.00000000 | −2.15264409 | 0.82346156  |
| H | 0.00000000 | 0.00000000  | 4.52676740  |
| H | 0.00000000 | 2.15264409  | 0.82346156  |
| I | 0.00000000 | 0.00000000  | −3.98192569 |
| C | 0.00000000 | 0.00000000  | −0.79170376 |

|   |            |             |             |
|---|------------|-------------|-------------|
| C | 0.00000000 | 0.00000000  | −1.99345097 |
| N | 0.00000000 | 2.45635994  | 3.45746229  |
| N | 0.00000000 | −2.45635994 | 3.45746229  |
| O | 0.00000000 | 3.47072507  | 2.80034851  |
| O | 0.00000000 | 2.39951071  | 4.66392252  |
| O | 0.00000000 | −2.39951071 | 4.66392252  |
| O | 0.00000000 | −3.47072507 | 2.80034851  |

**Table S14.** Cartesian coordinates (in Å) of (NO<sub>2</sub>)<sub>2</sub>BAI-PrmF at the M06-2X/aug-cc-pVTZ level of theory.

|   | <i>x</i>    | <i>y</i>    | <i>z</i>    |
|---|-------------|-------------|-------------|
| C | 1.12779469  | −0.47737187 | −0.00202675 |
| I | −0.84537787 | −0.86433232 | −0.01433518 |
| C | −4.27228615 | −2.54160688 | −0.05592536 |
| N | −5.57380404 | −2.78991370 | −0.06390254 |
| C | −6.38173291 | −1.73696630 | −0.04457950 |
| C | −4.52174952 | −0.29061130 | −0.01122880 |
| N | −3.70747415 | −1.33628163 | −0.03039097 |
| H | −7.44677057 | −1.93260253 | −0.05095532 |
| H | −3.60354104 | −3.39346955 | −0.07152362 |
| H | −4.05552171 | 0.68866056  | 0.00953364  |
| C | 4.17871611  | 1.33582484  | 0.04144183  |
| C | 5.54021429  | 1.56359404  | 0.04914596  |
| C | 6.47633712  | 0.54897465  | 0.03088440  |
| C | 5.98059770  | −0.73939341 | 0.00383246  |
| C | 4.63114909  | −1.02987409 | −0.00510543 |
| C | 3.71087533  | 0.02040237  | 0.01390974  |
| H | 3.49294165  | 2.16877719  | 0.05662343  |
| H | 7.53538999  | 0.75129221  | 0.03738293  |
| H | 4.30094950  | −2.05696566 | −0.02652222 |
| C | 2.30922412  | −0.24821600 | 0.00529201  |
| N | 6.94562780  | −1.86083041 | −0.01651140 |
| N | 6.02291981  | 2.96184963  | 0.07837834  |
| O | 6.49193929  | −2.98095957 | −0.04008304 |
| O | 8.12054383  | −1.57915216 | −0.00815065 |
| O | 7.21875317  | 3.13392012  | 0.08458231  |
| O | 5.18760426  | 3.83564099  | 0.09403830  |
| C | −6.79038765 | 0.72375140  | 0.00396960  |
| C | −6.57447000 | 2.06524395  | 0.03144195  |
| O | −8.12414572 | 0.47303120  | −0.00412947 |
| C | −7.86286777 | 2.67900717  | 0.04083167  |
| H | −5.61948251 | 2.56095926  | 0.04359966  |
| C | −8.75835134 | 1.66649890  | 0.01841758  |
| H | −8.08731243 | 3.73047936  | 0.06146235  |
| H | −9.83254798 | 1.62992923  | 0.01522001  |
| C | −5.90631244 | −0.42656679 | −0.01713700 |

**Table S15.** Cartesian coordinates (in Å) of (NO<sub>2</sub>)<sub>2</sub>BAI-PrmT at the M06-2X/aug-cc-pVTZ level of theory.

|   | <i>x</i>    | <i>y</i>    | <i>z</i>    |
|---|-------------|-------------|-------------|
| C | 1.11598850  | −0.52864538 | 0.00743656  |
| I | −0.85134705 | −0.94314810 | 0.00735479  |
| C | −4.25940270 | −2.66151884 | 0.03784008  |
| N | −5.55853169 | −2.92499662 | 0.02944184  |
| C | −6.37490974 | −1.88025806 | 0.00033238  |
| C | −4.53686543 | −0.41428674 | −0.03867731 |
| N | −3.70978313 | −1.45066844 | 0.00673819  |
| H | −7.43869962 | −2.09427070 | 0.01244481  |
| H | −3.58153729 | −3.50569704 | 0.06976227  |
| H | −4.08373119 | 0.56977165  | −0.09305119 |
| C | 4.12934024  | 1.34219104  | −0.01984934 |
| C | 5.48564615  | 1.59887020  | −0.02022451 |
| C | 6.44296257  | 0.60439174  | 0.00416273  |

|   |             |             |             |
|---|-------------|-------------|-------------|
| C | 5.97459754  | −0.69415505 | 0.02969347  |
| C | 4.63155803  | −1.01336765 | 0.03141628  |
| C | 3.68939085  | 0.01712837  | 0.00630047  |
| H | 3.42615167  | 2.16041400  | −0.03971087 |
| H | 7.49748811  | 0.82918643  | 0.00327274  |
| H | 4.32328220  | −2.04727355 | 0.05188459  |
| C | 2.29342219  | −0.27967832 | 0.00712359  |
| N | 6.96318275  | −1.79472063 | 0.05644101  |
| N | 5.93869533  | 3.00702432  | −0.04797364 |
| O | 6.53343325  | −2.92428609 | 0.07857075  |
| O | 8.13183911  | −1.48801015 | 0.05433886  |
| O | 7.13063324  | 3.20445907  | −0.04738972 |
| O | 5.08510292  | 3.86284443  | −0.06924295 |
| C | −6.81663830 | 0.59073892  | −0.06042011 |
| C | −6.56751668 | 1.85650643  | 0.39094248  |
| S | −8.40932118 | 0.48039180  | −0.71856496 |
| C | −7.66364386 | 2.73736722  | 0.20788492  |
| H | −5.63892847 | 2.14221502  | 0.86302623  |
| C | −8.72807485 | 2.12793744  | −0.37963749 |
| H | −7.66180411 | 3.77460368  | 0.50517170  |
| H | −9.68326983 | 2.55383237  | −0.63584513 |
| C | −5.92126757 | −0.56216990 | −0.03351262 |

**Table S16.** Harmonic vibrational frequencies (in  $\text{cm}^{-1}$ ), IR intensities (in  $\text{km mol}^{-1}$ ), Raman activities (in  $\text{\AA}^4 \text{amu}^{-1}$ ), and reduced masses (in  $\text{\AA}$ ) of **PrmF** at the M06-2X/aug-cc-pVTZ level of theory.

| Frequencies | IR Intensities | Raman Activities |
|-------------|----------------|------------------|
| 29          | 0.3            | 0.0              |
| 112         | 0.1            | 0.1              |
| 152         | 0.1            | 0.2              |
| 257         | 0.8            | 3.1              |
| 362         | 0.1            | 3.6              |
| 413         | 0.1            | 0.4              |
| 440         | 3.8            | 2.5              |
| 488         | 4.8            | 0.4              |
| 616         | 8.2            | 0.3              |
| 643         | 10.7           | 2.6              |
| 707         | 0.4            | 1.1              |
| 749         | 13.9           | 0.1              |
| 756         | 0.3            | 4.5              |
| 779         | 82.2           | 2.3              |
| 848         | 8.0            | 1.0              |
| 906         | 5.5            | 6.7              |
| 915         | 0.4            | 2.1              |
| 936         | 15.4           | 13.9             |
| 958         | 4.8            | 2.8              |
| 1011        | 0.0            | 0.1              |
| 1035        | 0.4            | 0.0              |
| 1039        | 26.2           | 34.7             |
| 1052        | 12.2           | 5.3              |
| 1091        | 1.4            | 76.8             |
| 1132        | 8.0            | 23.3             |
| 1173        | 2.1            | 17.7             |
| 1202        | 2.3            | 22.0             |
| 1218        | 9.6            | 10.5             |
| 1232        | 15.3           | 2.9              |
| 1274        | 7.9            | 3.2              |
| 1336        | 6.0            | 43.7             |
| 1379        | 3.3            | 1.3              |
| 1428        | 3.1            | 50.5             |
| 1464        | 54.1           | 115.3            |
| 1495        | 34.6           | 12.3             |
| 1558        | 25.6           | 516.0            |
| 1629        | 53.5           | 3.3              |
| 1652        | 28.1           | 5.4              |

|      |      |       |
|------|------|-------|
| 1680 | 2.3  | 845.4 |
| 3178 | 11.9 | 47.7  |
| 3200 | 11.3 | 62.2  |
| 3203 | 2.3  | 135.7 |
| 3280 | 3.1  | 76.3  |
| 3290 | 0.7  | 50.0  |
| 3309 | 0.5  | 173.3 |

**Table S17.** Harmonic vibrational frequencies (in  $\text{cm}^{-1}$ ), IR intensities (in  $\text{km mol}^{-1}$ ), Raman activities (in  $\text{\AA}^4 \text{amu}^{-1}$ ), and reduced masses (in  $\text{\AA}$ ) of **PrmT** at the M06-2X/aug-cc-pVTZ level of theory.

| Frequencies | IR Intensities | Raman Activities |
|-------------|----------------|------------------|
| 44          | 0.2            | 3.4              |
| 104         | 0.0            | 0.8              |
| 132         | 0.2            | 1                |
| 254         | 0.1            | 2.4              |
| 322         | 0.5            | 3.7              |
| 372         | 0.9            | 1.5              |
| 418         | 0.0            | 0.7              |
| 463         | 1.2            | 0.6              |
| 545         | 4.7            | 0.8              |
| 612         | 4.1            | 1.4              |
| 643         | 8.3            | 2.8              |
| 645         | 0.8            | 8.6              |
| 730         | 66.8           | 0.6              |
| 752         | 28.1           | 1.4              |
| 757         | 3.1            | 14.2             |
| 772         | 0.5            | 3.4              |
| 869         | 11.4           | 3.2              |
| 876         | 17.7           | 5.8              |
| 945         | 0.6            | 0.6              |
| 958         | 4.0            | 2.3              |
| 989         | 12.5           | 1.3              |
| 1014        | 0.6            | 4                |
| 1036        | 0.4            | 0.1              |
| 1067        | 5.6            | 17.1             |
| 1078        | 2.0            | 31.8             |
| 1103        | 1.8            | 25.3             |
| 1171        | 1.5            | 46.4             |
| 1200        | 0.9            | 13.8             |
| 1227        | 20.0           | 1                |
| 1261        | 8.5            | 1                |
| 1310        | 8.8            | 37.7             |
| 1377        | 5.2            | 19.1             |
| 1398        | 0.7            | 29.1             |
| 1465        | 51.3           | 148.3            |
| 1478        | 16.4           | 11.7             |
| 1509        | 46.6           | 358.6            |
| 1605        | 10.7           | 78.5             |
| 1628        | 59.4           | 2.7              |
| 1662        | 13.9           | 461.5            |
| 3170        | 11.4           | 41.7             |
| 3181        | 10.2           | 44.5             |
| 3202        | 9.9            | 156.7            |
| 3231        | 3.0            | 58.8             |
| 3246        | 1.3            | 137.8            |
| 3279        | 1.9            | 183              |

**Table S18.** Harmonic vibrational frequencies (in  $\text{cm}^{-1}$ ), IR intensities (in  $\text{km mol}^{-1}$ ), Raman activities (in  $\text{\AA}^4 \text{amu}^{-1}$ ), and reduced masses (in  $\text{\AA}$ ) of **(NO<sub>2</sub>)<sub>2</sub>BAI** at the M06-2X/aug-cc-pVTZ level of theory.

| Frequencies | IR Intensities | Raman Activities |
|-------------|----------------|------------------|
| 37          | 0.0            | 1.8              |
| 41          | 0.1            | 2.2              |
| 48          | 0.0            | 0.6              |

|      |       |        |
|------|-------|--------|
| 60   | 0.8   | 0.2    |
| 143  | 2.6   | 0.1    |
| 148  | 9.4   | 0.5    |
| 198  | 0.0   | 1.4    |
| 216  | 3.3   | 0.8    |
| 221  | 0.3   | 1.9    |
| 233  | 0.6   | 0.1    |
| 324  | 0.0   | 3.1    |
| 361  | 0.5   | 6.3    |
| 402  | 2.7   | 0.0    |
| 405  | 0.0   | 5.1    |
| 483  | 0.0   | 0.0    |
| 520  | 2.4   | 0.1    |
| 525  | 4.0   | 2.8    |
| 584  | 1.2   | 3.1    |
| 621  | 6.7   | 11.1   |
| 631  | 0.6   | 2.3    |
| 683  | 11.8  | 1.2    |
| 765  | 53.2  | 0.1    |
| 784  | 35.3  | 1.2    |
| 815  | 0.0   | 1.0    |
| 851  | 46.0  | 6.8    |
| 960  | 8.3   | 0.2    |
| 962  | 27.2  | 4.3    |
| 973  | 13.1  | 0.1    |
| 979  | 0.0   | 0.0    |
| 993  | 1.7   | 4.3    |
| 1022 | 0.4   | 76.7   |
| 1101 | 61.6  | 0.0    |
| 1144 | 14.9  | 18.9   |
| 1254 | 1.9   | 0.0    |
| 1292 | 10.6  | 186.7  |
| 1334 | 12.6  | 2.8    |
| 1457 | 332.0 | 17.6   |
| 1466 | 159.0 | 163.4  |
| 1473 | 20.8  | 23.0   |
| 1511 | 10.6  | 50.8   |
| 1643 | 21.0  | 22.8   |
| 1666 | 364.7 | 283.0  |
| 1698 | 138.2 | 1.3    |
| 1723 | 174.1 | 65.8   |
| 2331 | 73.7  | 2542.0 |
| 3254 | 0.2   | 57.7   |
| 3254 | 22.4  | 12.8   |
| 3266 | 44.1  | 35.6   |

**Table S19.** Harmonic vibrational frequencies (in  $\text{cm}^{-1}$ ), IR intensities (in  $\text{km mol}^{-1}$ ), Raman activities (in  $\text{\AA}^4 \text{amu}^{-1}$ ), and reduced masses (in  $\text{\AA}$ ) of  $(\text{NO}_2)_2\text{BAI-PrmF}$  at the M06-2X/aug-cc-pVTZ level of theory.

| Frequencies | IR Intensities | Raman Activities |
|-------------|----------------|------------------|
| 5           | 0.1            | 0.3              |
| 7           | 0.3            | 1.5              |
| 13          | 0.4            | 1.4              |
| 27          | 0.1            | 3.1              |
| 28          | 0.1            | 1.8              |
| 42          | 0.1            | 3.7              |
| 48          | 0.0            | 0.5              |
| 54          | 0.3            | 0.2              |
| 58          | 2.1            | 4.6              |
| 71          | 4.1            | 5.8              |
| 81          | 1.0            | 2.2              |
| 115         | 0.7            | 0.1              |
| 142         | 8.9            | 3.6              |
| 155         | 7.5            | 0.1              |

|      |       |       |
|------|-------|-------|
| 158  | 0.1   | 0.1   |
| 199  | 0.0   | 1.3   |
| 215  | 1.8   | 11.0  |
| 239  | 2.5   | 0.5   |
| 249  | 1.1   | 0.7   |
| 258  | 0.8   | 3.0   |
| 332  | 0.0   | 3.5   |
| 361  | 0.2   | 5.5   |
| 364  | 0.3   | 5.1   |
| 405  | 2.3   | 0.0   |
| 414  | 0.1   | 1.9   |
| 422  | 0.3   | 3.4   |
| 442  | 2.5   | 5.2   |
| 484  | 0.0   | 0.0   |
| 493  | 3.7   | 0.5   |
| 522  | 2.3   | 0.1   |
| 523  | 1.0   | 0.7   |
| 588  | 0.9   | 3.9   |
| 608  | 0.1   | 0.7   |
| 615  | 8.0   | 0.4   |
| 632  | 0.5   | 2.7   |
| 650  | 25.3  | 8.6   |
| 686  | 11.0  | 1.7   |
| 705  | 0.4   | 1.0   |
| 746  | 14.1  | 0.1   |
| 759  | 1.7   | 9.3   |
| 764  | 52.5  | 0.2   |
| 783  | 73.1  | 2.5   |
| 784  | 40.3  | 1.4   |
| 816  | 0.0   | 1.0   |
| 849  | 73.2  | 4.2   |
| 853  | 6.3   | 0.9   |
| 906  | 6.1   | 7.9   |
| 919  | 0.3   | 2.5   |
| 938  | 14.4  | 23.1  |
| 958  | 5.3   | 3.0   |
| 962  | 27.1  | 4.5   |
| 962  | 2.3   | 0.1   |
| 971  | 19.2  | 0.3   |
| 984  | 0.1   | 0.0   |
| 989  | 10.4  | 18.1  |
| 1012 | 0.0   | 0.1   |
| 1022 | 0.4   | 99.6  |
| 1034 | 0.4   | 0.1   |
| 1040 | 27.3  | 47.7  |
| 1056 | 16.9  | 14.2  |
| 1091 | 9.5   | 149.1 |
| 1105 | 60.0  | 0.0   |
| 1132 | 21.1  | 36.2  |
| 1146 | 11.2  | 38.5  |
| 1173 | 1.8   | 25.2  |
| 1205 | 1.7   | 16.0  |
| 1221 | 20.0  | 24.1  |
| 1232 | 38.4  | 5.7   |
| 1257 | 2.1   | 0.1   |
| 1275 | 7.6   | 1.9   |
| 1290 | 30.3  | 329.5 |
| 1335 | 13.0  | 3.5   |
| 1339 | 5.1   | 42.1  |
| 1379 | 2.5   | 2.2   |
| 1429 | 3.5   | 72.3  |
| 1457 | 326.6 | 22.0  |
| 1465 | 63.2  | 166.3 |
| 1466 | 168.5 | 233.6 |
| 1472 | 23.5  | 30.0  |

|      |       |        |
|------|-------|--------|
| 1498 | 41.4  | 27.0   |
| 1510 | 23.0  | 93.1   |
| 1557 | 38.6  | 689.0  |
| 1630 | 68.8  | 22.2   |
| 1642 | 21.6  | 22.4   |
| 1657 | 74.3  | 9.6    |
| 1664 | 421.1 | 446.0  |
| 1681 | 0.9   | 1049.8 |
| 1696 | 134.8 | 1.6    |
| 1721 | 148.2 | 131.1  |
| 2321 | 117.2 | 3912.9 |
| 3181 | 7.5   | 22.9   |
| 3202 | 5.0   | 58.9   |
| 3205 | 0.8   | 98.9   |
| 3252 | 9.7   | 31.0   |
| 3255 | 10.5  | 32.1   |
| 3267 | 49.0  | 34.7   |
| 3280 | 2.9   | 73.0   |
| 3290 | 1.1   | 56.9   |
| 3310 | 0.8   | 202.7  |

**Table S20.** Harmonic vibrational frequencies (in  $\text{cm}^{-1}$ ), IR intensities (in  $\text{km mol}^{-1}$ ), and Raman activities (in  $\text{\AA}^4 \text{amu}^{-1}$ ), and reduced masses (in  $\text{\AA}$ ) of  $(\text{NO}_2)_2\text{BAI-PrmT}$  at the M06-2X/aug-cc-pVTZ level of theory.

| Frequencies | IR Intensities | Raman Activities |
|-------------|----------------|------------------|
| 3           | 0.2            | 0.5              |
| 5           | 0.2            | 1.5              |
| 8           | 0.2            | 1.8              |
| 27          | 0.0            | 1.8              |
| 29          | 0.1            | 4.6              |
| 44          | 0.0            | 2.9              |
| 48          | 0.0            | 0.6              |
| 57          | 1.4            | 2.6              |
| 57          | 1.1            | 3.6              |
| 70          | 3.4            | 5                |
| 81          | 1.2            | 2.4              |
| 108         | 0.5            | 1.5              |
| 140         | 0.3            | 1                |
| 142         | 9.5            | 3.8              |
| 155         | 7.5            | 0.2              |
| 199         | 0.0            | 1.3              |
| 215         | 1.8            | 11.1             |
| 238         | 2.4            | 0.5              |
| 248         | 0.9            | 0.8              |
| 254         | 0.2            | 2.2              |
| 324         | 0.1            | 7.1              |
| 333         | 0.0            | 2.7              |
| 361         | 0.2            | 5.9              |
| 374         | 0.4            | 2.6              |
| 404         | 2.4            | 0                |
| 414         | 0.0            | 3.7              |
| 425         | 0.2            | 2                |
| 465         | 0.8            | 1.5              |
| 484         | 0.0            | 0                |
| 522         | 2.3            | 0.1              |
| 523         | 1.0            | 0.7              |
| 546         | 4.2            | 1.1              |
| 587         | 0.9            | 3.9              |
| 608         | 0.1            | 0.7              |
| 611         | 4.8            | 1.5              |
| 632         | 0.4            | 2.7              |
| 645         | 4.7            | 7.8              |
| 651         | 18.7           | 10.1             |
| 686         | 10.9           | 1.7              |

|      |       |        |
|------|-------|--------|
| 735  | 62.2  | 0.6    |
| 750  | 29.9  | 0.8    |
| 760  | 0.8   | 22.7   |
| 764  | 52.5  | 0.2    |
| 772  | 0.7   | 4.8    |
| 784  | 35.7  | 1.5    |
| 816  | 0.0   | 0.9    |
| 849  | 74.4  | 4.5    |
| 874  | 10.6  | 4.5    |
| 878  | 23.7  | 3.1    |
| 949  | 0.6   | 0.6    |
| 961  | 4.3   | 2.8    |
| 961  | 3.0   | 0.1    |
| 962  | 27.0  | 4.4    |
| 971  | 18.5  | 0.3    |
| 983  | 0.0   | 0      |
| 989  | 14.6  | 20.1   |
| 996  | 21.0  | 4.3    |
| 1016 | 0.6   | 4.8    |
| 1022 | 0.4   | 101.2  |
| 1035 | 0.4   | 0      |
| 1068 | 7.2   | 38.7   |
| 1079 | 4.3   | 59.2   |
| 1106 | 2.9   | 36.7   |
| 1107 | 59.5  | 0      |
| 1144 | 11.0  | 39.9   |
| 1172 | 4.1   | 74.8   |
| 1206 | 1.1   | 16.9   |
| 1226 | 55.1  | 1.9    |
| 1256 | 1.9   | 0.1    |
| 1262 | 10.4  | 0.7    |
| 1290 | 30.4  | 331.1  |
| 1312 | 10.3  | 47.8   |
| 1334 | 13.1  | 3.6    |
| 1377 | 4.5   | 29.9   |
| 1399 | 1.4   | 38.5   |
| 1457 | 325.5 | 21.7   |
| 1466 | 53.0  | 201.1  |
| 1466 | 173.3 | 257.6  |
| 1472 | 24.3  | 29.9   |
| 1479 | 16.0  | 20.4   |
| 1508 | 73.7  | 452.3  |
| 1510 | 21.8  | 91.8   |
| 1605 | 12.4  | 88.1   |
| 1634 | 108.0 | 42.6   |
| 1642 | 22.0  | 22.2   |
| 1663 | 28.5  | 546.4  |
| 1664 | 412.5 | 475.2  |
| 1696 | 134.4 | 1.4    |
| 1721 | 150.0 | 130.7  |
| 2320 | 117.5 | 3950.8 |
| 3174 | 11.8  | 66.4   |
| 3182 | 6.4   | 20.7   |
| 3203 | 2.2   | 87.6   |
| 3231 | 2.7   | 57.8   |
| 3248 | 1.2   | 121.2  |
| 3253 | 9.6   | 30.8   |
| 3255 | 10.5  | 32.2   |
| 3268 | 49.4  | 34.8   |
| 3279 | 2.8   | 223.3  |

**Table S21.** Point group symmetries, binding energies ( $E_{\text{bind}}$  in kcal mol<sup>-1</sup>), halogen bond intermolecular separation ( $R_{\text{I} \cdots \text{N}}$  in Å), halogen bond angle ( $\alpha_{\text{C-I} \cdots \text{N}}$  in °), and percent reduction in the

sum of van der Waals radii upon complexation (%rsvdW) of the halogen bond complexes at the M06-2X/aug-cc-pVTZ level of theory.

| Complex                                  | Symmetry       | $E_{\text{bind}}^a$ | $R_{\text{I}\cdots\text{N}}$ | $\alpha_{\text{C-I}\cdots\text{N}}$ | %rsvdW <sup>b</sup> |
|------------------------------------------|----------------|---------------------|------------------------------|-------------------------------------|---------------------|
| (NO <sub>2</sub> ) <sub>2</sub> BAI-PrmF | C <sub>s</sub> | −6.99               | 2.90                         | 178                                 | 30.5                |
| (NO <sub>2</sub> ) <sub>2</sub> BAI-PrmT | C <sub>1</sub> | −6.92               | 2.90                         | 178                                 | 30.5                |

$$^a E_{\text{bind}} = E_{\text{complex}} - E_{\text{acceptor}} - E_{\text{donor}}$$

<sup>b</sup> Relative to the sum of nitrogen (1.79 Å) and iodine (2.38 Å) van der Waals radii.<sup>1</sup>

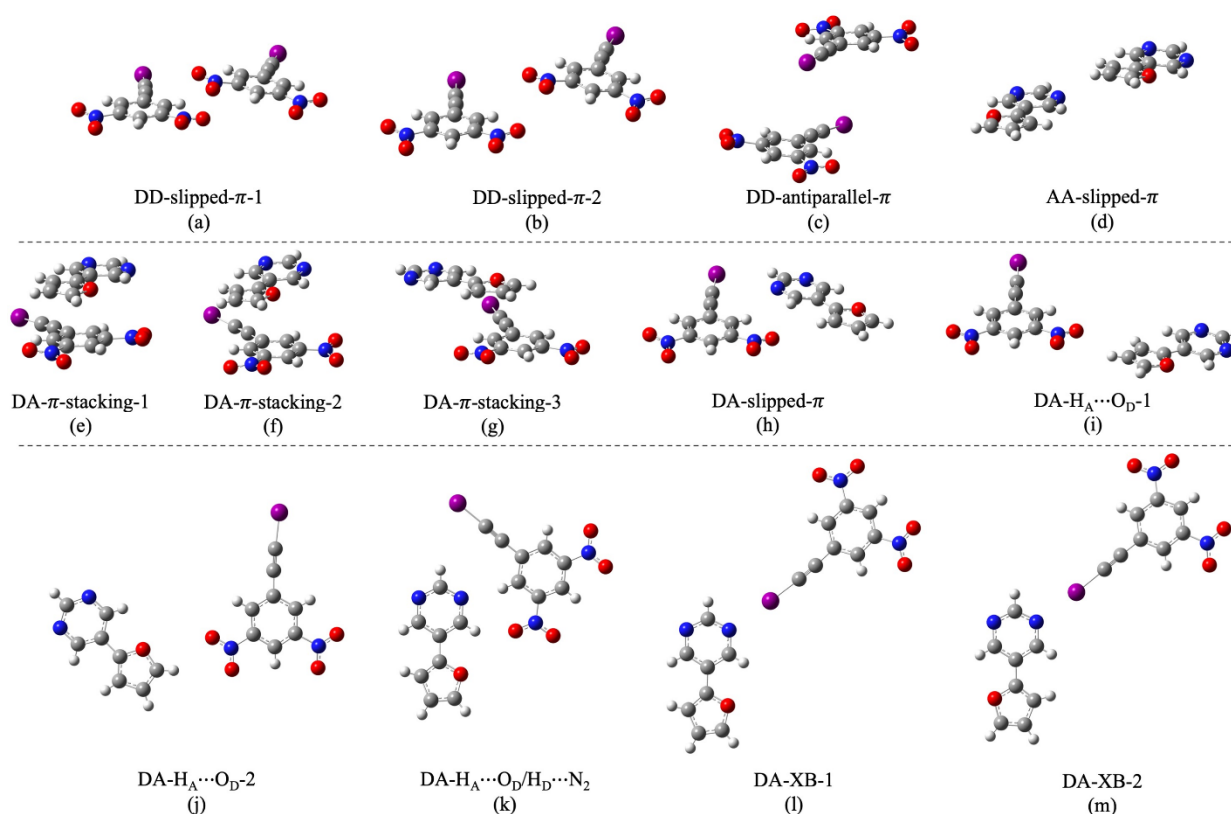

**Figure S3.** Energetically competitive pairwise contacts in the experimental crystal structure of (NO<sub>2</sub>)<sub>2</sub>BAI-PrmF. DD, AA, and DA denote a donor-donor, acceptor-acceptor, and a donor-acceptor interaction.

**Table S22.** Interaction energies, with ( $E_{\text{int}}^{\text{CP}}$  in kcal mol<sup>−1</sup>) and without ( $E_{\text{int}}$  in kcal mol<sup>−1</sup>) the Boys-Bernardi counterpoise (CP) procedure,<sup>2</sup> and the average of the two ( $E_{\text{int}}^{\text{Avg}}$  in kcal mol<sup>−1</sup>; kJ mol<sup>−1</sup> in parenthesis) observed in the experimental crystal structure of (NO<sub>2</sub>)<sub>2</sub>BAI-PrmF.

| Contact                                                                   | $E_{\text{int}}$ | $E_{\text{int}}^{\text{CP}}$ | $E_{\text{int}}^{\text{Avg}}$ |
|---------------------------------------------------------------------------|------------------|------------------------------|-------------------------------|
| (a) DD-slipped- $\pi$ -1                                                  | −1.6             | −1.4                         | −1.5 (−6.3)                   |
| (b) DD-slipped- $\pi$ -2                                                  | −1.5             | −1.3                         | −1.4 (−5.6)                   |
| (c) DD-antiparallel- $\pi$                                                | −0.9             | −0.8                         | −0.9 (−3.8)                   |
| (d) AA-slipped- $\pi$                                                     | −0.9             | −0.8                         | −0.9 (−3.8)                   |
| (e) DA- $\pi$ -stacking-1                                                 | −7.7             | −6.9                         | −7.3 (−30.5)                  |
| (f) DA- $\pi$ -stacking-2                                                 | −7.8             | −7.1                         | −7.4 (−31.0)                  |
| (g) DA- $\pi$ -stacking-3                                                 | −6.4             | −5.9                         | −6.2 (−25.9)                  |
| (h) DA-slipped- $\pi$                                                     | −3.8             | −3.6                         | −3.7 (−15.5)                  |
| (i) DA-H <sub>A</sub> ...O <sub>D</sub> -1                                | −1.1             | −1.0                         | −1.1 (−4.6)                   |
| (j) DA-H <sub>A</sub> ...O <sub>D</sub> -2                                | −1.6             | −1.5                         | −1.5 (−6.3)                   |
| (k) DA-H <sub>A</sub> ...O <sub>D</sub> /H <sub>D</sub> ...N <sub>A</sub> | −4.2             | −3.8                         | −4.0 (−16.7)                  |
| (l) DA-XB-1                                                               | −7.2             | −7.1                         | −7.1 (−29.7)                  |
| (m) DA-XB-2                                                               | −7.0             | −6.9                         | −7.0 (−29.3)                  |

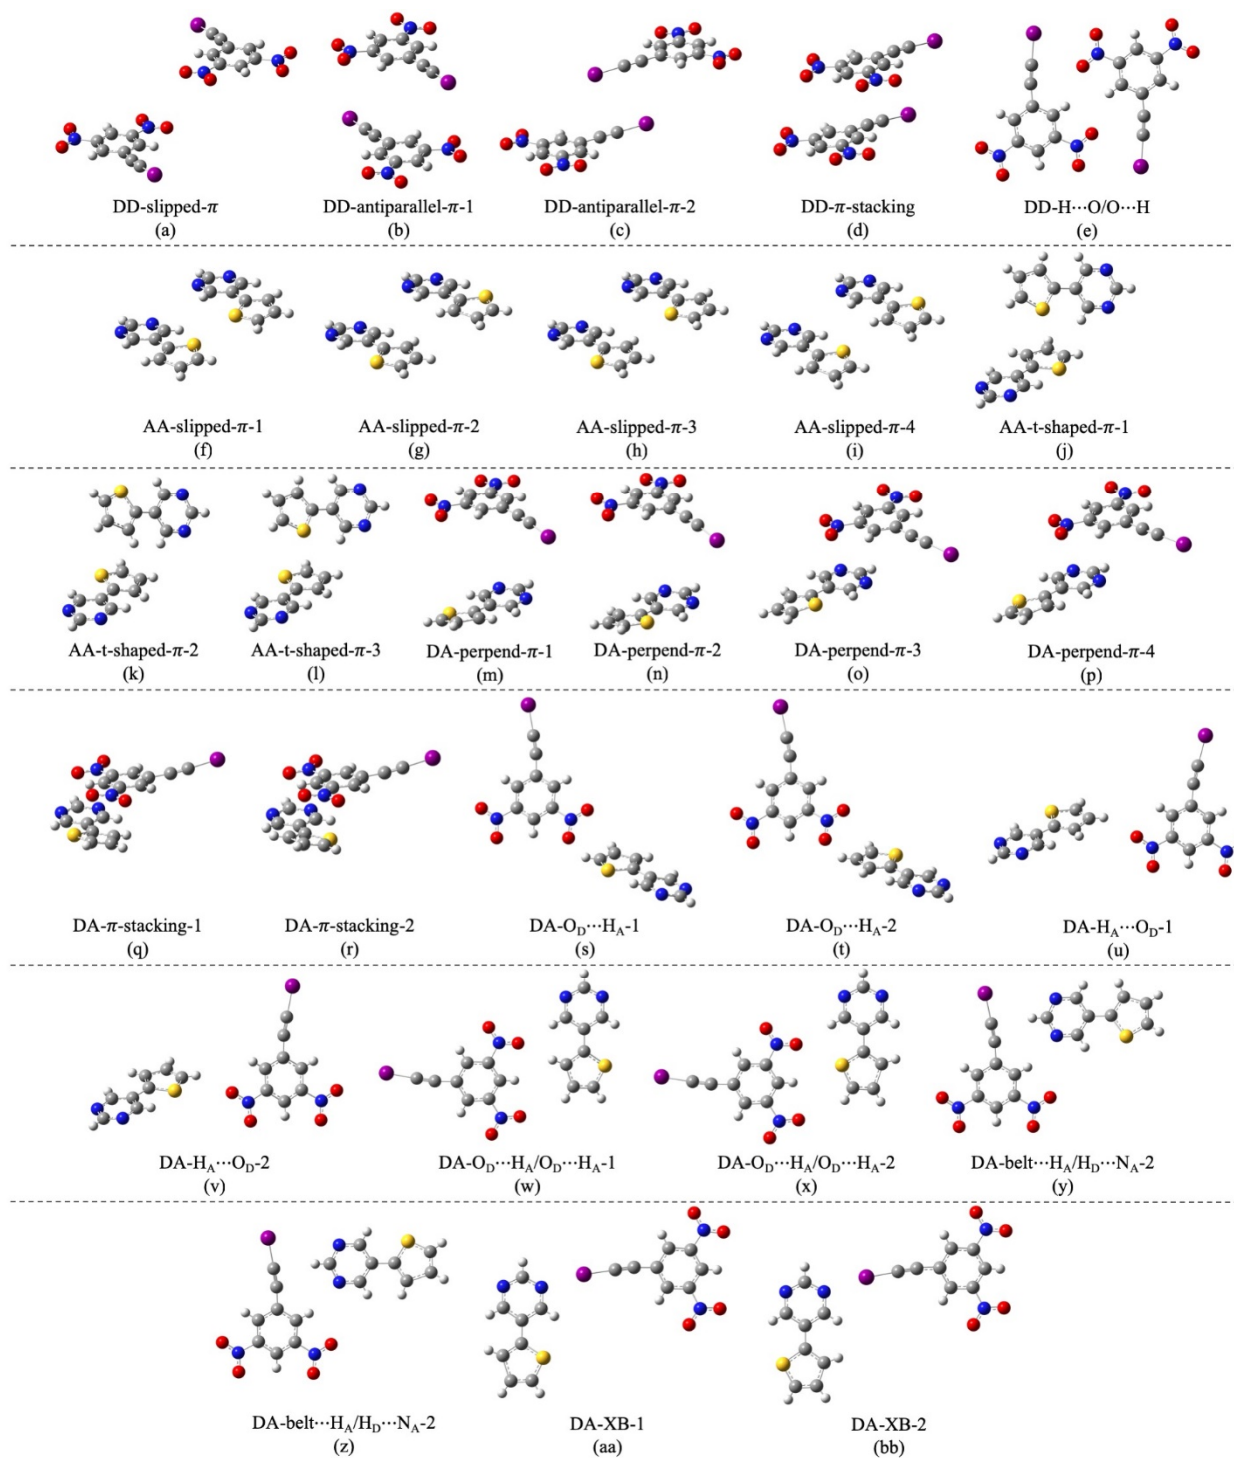

**Figure S4.** Energetically competitive pairwise contacts in the experimental crystal structure of  $(\text{NO}_2)_2\text{BAI-PrmT}$ . DD, AA, and DA denote a donor-donor, acceptor-acceptor, and a donor-acceptor interaction.

**Table S23.** Interaction energies, with ( $E_{\text{int}}^{\text{CP}}$  in kcal mol $^{-1}$ ) and without ( $E_{\text{int}}$  in kcal mol $^{-1}$ ) the Boys-Bernardi counterpoise (CP) procedure,<sup>2</sup> and the average of the two ( $E_{\text{int}}^{\text{Avg}}$  in kcal mol $^{-1}$ ; kJ mol $^{-1}$  in parenthesis) observed in the experimental crystal structure of  $(\text{NO}_2)_2\text{BAI-PrmT}$ .

| Contact                       | $E_{\text{int}}$ | $E_{\text{int}}^{\text{CP}}$ | $E_{\text{int}}^{\text{Avg}}$ |
|-------------------------------|------------------|------------------------------|-------------------------------|
| (a) DD-slipped- $\pi$         | −0.8             | −0.8                         | −0.8 (−3.3)                   |
| (b) DD-antiparallel- $\pi$ -1 | −1.6             | −1.5                         | −1.6 (−6.7)                   |
| (c) DD-antiparallel- $\pi$ -2 | −0.8             | −0.7                         | −0.7 (−2.9)                   |
| (d) DD- $\pi$ -stacking       | −5.5             | −5.0                         | −5.2 (−21.8)                  |

|                                           |      |      |              |
|-------------------------------------------|------|------|--------------|
| (e) DD-H $\cdots$ O/O $\cdots$ H          | -4.2 | -3.9 | -4.0 (-16.7) |
| (f) AA-slipped- $\pi$ -1                  | -1.7 | -1.4 | -1.5 (-6.3)  |
| (g) AA-slipped- $\pi$ -2                  | -1.9 | -1.6 | -1.8 (-7.5)  |
| (h) AA-slipped- $\pi$ -3                  | -2.0 | -1.7 | -3.7 (-15.5) |
| (i) AA-slipped- $\pi$ -4                  | -1.5 | -1.2 | -1.3 (-5.4)  |
| (j) AA-t-shaped- $\pi$ -1                 | -3.3 | -2.9 | -3.1 (-13.0) |
| (k) AA-t-shaped- $\pi$ -2                 | -3.0 | -2.7 | -2.8 (-11.7) |
| (l) AA-t-shaped- $\pi$ -3                 | -3.2 | -2.8 | -3.0 (-12.6) |
| (m) DA-perpend- $\pi$ -1                  | -1.2 | -1.1 | -1.2 (-5.0)  |
| (n) DA-perpend- $\pi$ -2                  | -1.3 | -1.2 | -1.2 (-5.0)  |
| (o) DA-perpend- $\pi$ -3                  | -4.1 | -3.7 | -3.9 (-16.3) |
| (p) DA-perpend- $\pi$ -4                  | -4.0 | -3.6 | -3.8 (-15.9) |
| (q) DA- $\pi$ -stacking-1                 | -7.4 | -6.7 | -7.0 (-29.3) |
| (r) DA- $\pi$ -stacking-2                 | -7.6 | -6.9 | -7.2 (-30.1) |
| (s) DA-OD $\cdots$ HA-1                   | -2.2 | -2.1 | -2.2 (-9.2)  |
| (t) DA-OD $\cdots$ HA-2                   | -2.1 | -2.0 | -2.0 (-8.4)  |
| (u) DA-HA $\cdots$ OD-1                   | -1.2 | -1.1 | -1.1 (-4.6)  |
| (v) DA-HA $\cdots$ OD-2                   | -0.7 | -0.6 | -0.6 (-2.5)  |
| (w) DA-OD $\cdots$ HA/OD $\cdots$ HA-1    | -2.1 | -1.8 | -2.0 (-8.4)  |
| (x) DA-OD $\cdots$ HA/OD $\cdots$ HA-2    | -1.6 | -1.3 | -1.5 (-6.3)  |
| (y) DA-belt $\cdots$ HA/ HD $\cdots$ NA-1 | -3.1 | -2.9 | -3.0 (-12.6) |
| (z) DA-belt $\cdots$ HA/ HD $\cdots$ NA-1 | -3.2 | -3.0 | -3.1 (-13.0) |
| (aa) DA-XB-1                              | -6.8 | -6.7 | -6.8 (-28.5) |
| (bb) DA-XB-2                              | -6.8 | -6.7 | -6.8 (-28.5) |

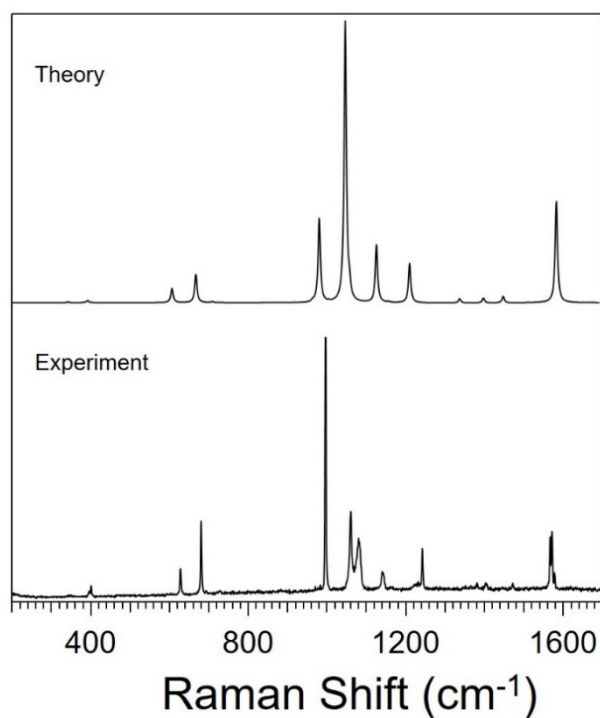

**Figure S5.** Experimental Raman spectra of **Prm** compared to its simulated spectrum (top).

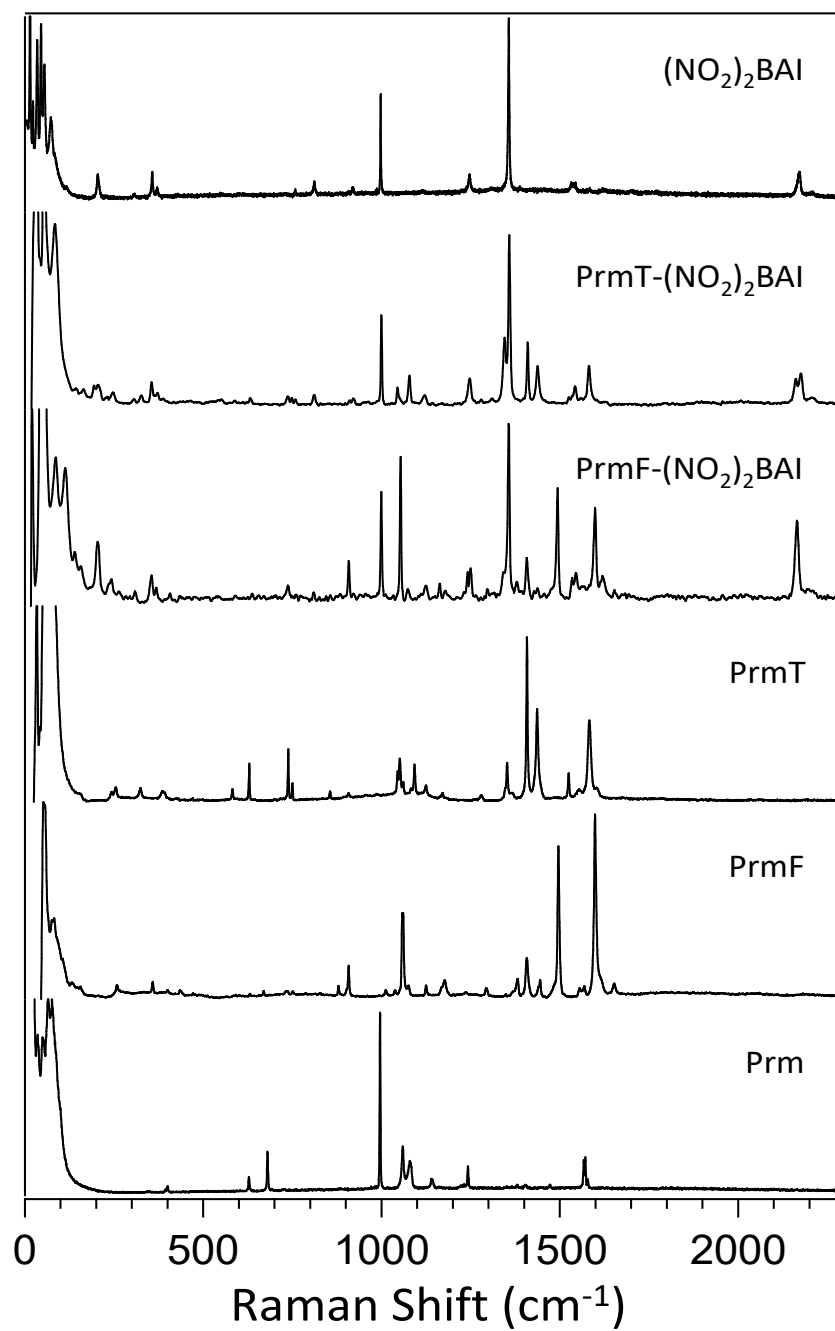

**Figure S6.** Experimental Raman spectra of **Prm**, **PrmF**, **PrmT**, **PrmF- $(\text{NO}_2)_2\text{BAI}$** , **PrmT- $(\text{NO}_2)_2\text{BAI}$** , and  **$(\text{NO}_2)_2\text{BAI}$** .

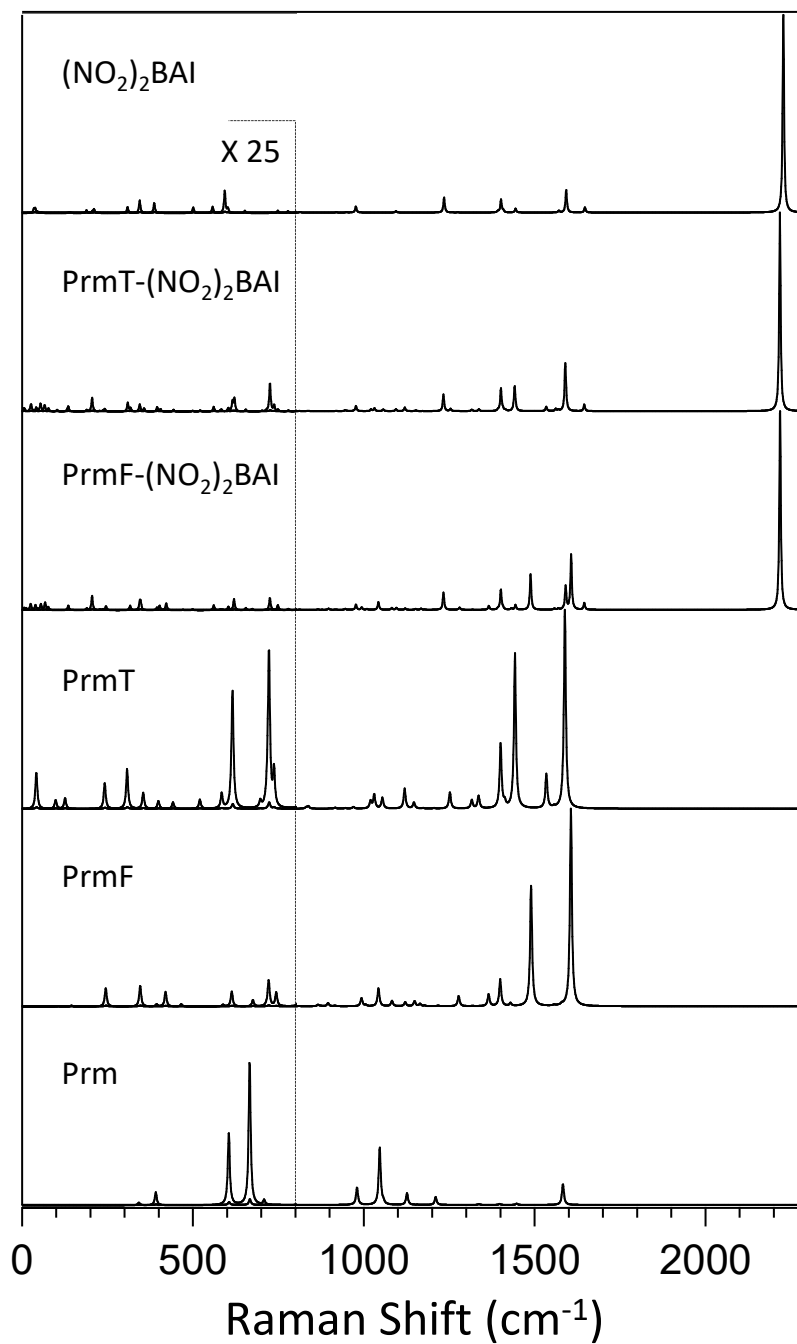

**Figure S7.** Simulated Raman spectra of Prm, PrmF, PrmT, PrmF-(NO<sub>2</sub>)<sub>2</sub>BAI, PrmT-(NO<sub>2</sub>)<sub>2</sub>BAI, and (NO<sub>2</sub>)<sub>2</sub>BAI.

## References

1. Rahm, M.; Hoffmann, R.; Ashcroft, N. W., Atomic and Ionic Radii of Elements 1–96. *Chemistry–A European Journal* 2016, 22, 14625–14632.
2. Boys, S. F.; Bernardi, F., The Calculation of Small Molecular Interactions by the Differences of Separate Total Energies. Some Procedures with Reduced Errors. *Molecular Physics* 1970, 19, 553–566.
