# Supplementary material
Source: MDPI journal article supplement (https://www.mdpi.com/2304-6740/7/10/119)
Supplement: s1 [file s1]

Archive with 6 entries (5 files):
- inorganics-601277-supplementary-final/
- inorganics-601277-supplementary-final/dwat16_0m_a.cif
- inorganics-601277-supplementary-final/dwat16_0m_a_checkcif.pdf
- inorganics-601277-supplementary-final/dwat21_0m_a_sq.cif
- inorganics-601277-supplementary-final/dwat21_0m_a_sq_checkcif.pdf
- inorganics-601277-supplementary-final/inorganics-601277-supplementary.pdf
