# Supplementary material
Source: MDPI journal article supplement (https://www.mdpi.com/2304-6740/7/10/119)
Supplement: s1 [file s1 › inorganics-601277-supplementary-final/dwat16_0m_a.cif]

data_dwat16_0m_a
_audit_creation_date              2017-02-10
_audit_creation_method
;
Olex2 1.2-beta
(compiled 2017.01.04 svn.r3372 for OlexSys, GUI svn.r5292)
;
_shelx_SHELXL_version_number      '2014/7'
_publ_contact_author_address      ?
_publ_contact_author_email        ?
_publ_contact_author_id_orcid     ?
_publ_contact_author_name         ''
_publ_contact_author_phone        ?
_publ_section_references
;
Dolomanov, O.V., Bourhis, L.J., Gildea, R.J, Howard, J.A.K. & Puschmann, H.
 (2009), J. Appl. Cryst. 42, 339-341.

Sheldrick, G.M. (2015). Acta Cryst. A71, 3-8.

Sheldrick, G.M. (2015). Acta Cryst. C71, 3-8.
;
_chemical_name_common             ?
_chemical_name_systematic         ?
_chemical_formula_moiety          '2(C8 H3 I N2 O4), 2(C8 H6 N2 S)'
_chemical_formula_sum             'C32 H18 I2 N8 O8 S2'
_chemical_formula_weight          960.46
_chemical_melting_point           ?
loop_
  _atom_type_symbol
  _atom_type_description
  _atom_type_scat_dispersion_real
  _atom_type_scat_dispersion_imag
  _atom_type_scat_source
 'C' 'C' 0.0033 0.0016 'International Tables Vol C Tables 4.2.6.8 and 6.1.1.4'
 'H' 'H' 0.0000 0.0000 'International Tables Vol C Tables 4.2.6.8 and 6.1.1.4'
 'I' 'I' -0.4742 1.8119 'International Tables Vol C Tables 4.2.6.8 and 6.1.1.4'
 'N' 'N' 0.0061 0.0033 'International Tables Vol C Tables 4.2.6.8 and 6.1.1.4'
 'O' 'O' 0.0106 0.0060 'International Tables Vol C Tables 4.2.6.8 and 6.1.1.4'
 'S' 'S' 0.1246 0.1234 'International Tables Vol C Tables 4.2.6.8 and 6.1.1.4'

_shelx_space_group_comment
;
The symmetry employed for this shelxl refinement is uniquely defined
by the following loop, which should always be used as a source of
symmetry information in preference to the above space-group names.
They are only intended as comments.
;
_space_group_crystal_system       'monoclinic'
_space_group_IT_number            14
_space_group_name_H-M_alt         'P 1 21/n 1'
_space_group_name_Hall            '-P 2yn'
loop_
  _space_group_symop_operation_xyz
 'x, y, z'
 '-x+1/2, y+1/2, -z+1/2'
 '-x, -y, -z'
 'x-1/2, -y-1/2, z-1/2'

_cell_length_a                    9.2195(6)
_cell_length_b                    5.7344(4)
_cell_length_c                    32.1204(16)
_cell_angle_alpha                 90
_cell_angle_beta                  93.209(3)
_cell_angle_gamma                 90
_cell_volume                      1695.49(18)
_cell_formula_units_Z             2
_cell_measurement_reflns_used     6939
_cell_measurement_temperature     100
_cell_measurement_theta_max       28.279
_cell_measurement_theta_min       2.539
_shelx_estimated_absorpt_T_max    0.854
_shelx_estimated_absorpt_T_min    0.570
_exptl_absorpt_coefficient_mu     2.043
_exptl_absorpt_correction_T_max   0.2627
_exptl_absorpt_correction_T_min   0.1977
_exptl_absorpt_correction_type    multi-scan
_exptl_absorpt_process_details
'SADABS-2016/2 (Bruker,2016/2) was used for absorption correction. wR2(int) was 0.1148 before and 0.0873 after correction. The Ratio of minimum to maximum transmission is 0.7526. The \l/2 correction factor is Not present.'
_exptl_absorpt_special_details    ?
_exptl_crystal_colour             colourless
_exptl_crystal_colour_primary     colourless
_exptl_crystal_density_diffrn     1.881
_exptl_crystal_density_meas       ?
_exptl_crystal_density_method     ?
_exptl_crystal_description        plate
_exptl_crystal_F_000              936
_exptl_crystal_size_max           0.31
_exptl_crystal_size_mid           0.29
_exptl_crystal_size_min           0.08
_exptl_transmission_factor_max    ?
_exptl_transmission_factor_min    ?
_diffrn_reflns_av_R_equivalents   0.0722
_diffrn_reflns_av_unetI/netI      0.0697
_diffrn_reflns_Laue_measured_fraction_full 0.999
_diffrn_reflns_Laue_measured_fraction_max 0.996
_diffrn_reflns_limit_h_max        12
_diffrn_reflns_limit_h_min        -12
_diffrn_reflns_limit_k_max        5
_diffrn_reflns_limit_k_min        -7
_diffrn_reflns_limit_l_max        42
_diffrn_reflns_limit_l_min        -42
_diffrn_reflns_number             14426
_diffrn_reflns_point_group_measured_fraction_full 0.999
_diffrn_reflns_point_group_measured_fraction_max 0.996
_diffrn_reflns_theta_full         25.000
_diffrn_reflns_theta_max          28.339
_diffrn_reflns_theta_min          2.267
_diffrn_ambient_temperature       100.0
_diffrn_detector                  'Bruker APEX-II CCD'
_diffrn_detector_area_resol_mean  7.9
_diffrn_detector_type             'CCD Area Detector'
_diffrn_measured_fraction_theta_full 0.999
_diffrn_measured_fraction_theta_max 0.996
_diffrn_measurement_device        'Kappa Four-Circle Diffractometer'
_diffrn_measurement_device_type   'Bruker APEX-II CCD'
_diffrn_measurement_method        '\f and \w scans'
_diffrn_radiation_monochromator   graphite
_diffrn_radiation_probe           X-ray
_diffrn_radiation_type            MoK\a
_diffrn_radiation_wavelength      0.71073
_diffrn_radiation_xray_symbol     K-L~3~
_diffrn_source                    rotating-anode
_diffrn_source_type               fine-focus
_diffrn_standards_number          0
_reflns_Friedel_coverage          0.000
_reflns_Friedel_fraction_full     .
_reflns_Friedel_fraction_max      .
_reflns_number_gt                 3944
_reflns_number_total              4232
_reflns_special_details
;
 Reflections were merged by SHELXL according to the crystal
 class for the calculation of statistics and refinement.
 
 _reflns_Friedel_fraction is defined as the number of unique
 Friedel pairs measured divided by the number that would be
 possible theoretically, ignoring centric projections and
 systematic absences.
;
_reflns_threshold_expression      'I > 2\s(I)'
_computing_cell_refinement        'SAINT v8.37A (Bruker, 2015)'
_computing_data_collection        'APEX2 v2014.11-0 (Bruker, 2014)'
_computing_data_reduction         'SAINT v8.37A (Bruker, 2015)'
_computing_molecular_graphics     'Olex2 (Dolomanov et al., 2009)'
_computing_publication_material   'Olex2 (Dolomanov et al., 2009)'
_computing_structure_refinement   'ShelXL (Sheldrick, 2015)'
_computing_structure_solution     'ShelXT (Sheldrick, 2015)'
_refine_diff_density_max          0.650
_refine_diff_density_min          -0.990
_refine_diff_density_rms          0.150
_refine_ls_extinction_coef        .
_refine_ls_extinction_method      none
_refine_ls_goodness_of_fit_ref    1.164
_refine_ls_hydrogen_treatment     constr
_refine_ls_matrix_type            full
_refine_ls_number_parameters      242
_refine_ls_number_reflns          4232
_refine_ls_number_restraints      30
_refine_ls_R_factor_all           0.0470
_refine_ls_R_factor_gt            0.0438
_refine_ls_restrained_S_all       1.170
_refine_ls_shift/su_max           0.004
_refine_ls_shift/su_mean          0.000
_refine_ls_structure_factor_coef  Fsqd
_refine_ls_weighting_details
'w=1/[\s^2^(Fo^2^)+(0.0173P)^2^+2.5043P] where P=(Fo^2^+2Fc^2^)/3'
_refine_ls_weighting_scheme       calc
_refine_ls_wR_factor_gt           0.1022
_refine_ls_wR_factor_ref          0.1040
_refine_special_details           ?
_olex2_refinement_description
;
1. Fixed Uiso
 At 1.2 times of:
  All C(H) groups, All C(H,H) groups
2. Uiso/Uaniso restraints and constraints
Uanis(C14) = Uanis(S1')
Uanis(S1) = Uanis(C14')
3. Rigid body (RIGU) restrains
 C14', C16, C15, S1', C13
 with sigma for 1-2 distances of 0.002 and sigma for 1-3 distances of 0.002
4. Others
 Sof(H16A)=Sof(H15A)=Sof(C14)=Sof(H14)=Sof(S1)=1-FVAR(1)
 Sof(S1')=Sof(H16)=Sof(H15)=Sof(C14')=Sof(H14')=FVAR(1)
5.a Aromatic/amide H refined with riding coordinates:
 C12(H12), C10(H10), C9(H9), C4(H4), C6(H6), C16(H16), C16(H16A), C8(H8),
 C15(H15), C15(H15A), C14'(H14'), C14(H14)
;
_atom_sites_solution_hydrogens    geom
_atom_sites_solution_primary      dual
_atom_sites_solution_secondary    ?
loop_
  _atom_site_label
  _atom_site_type_symbol
  _atom_site_fract_x
  _atom_site_fract_y
  _atom_site_fract_z
  _atom_site_U_iso_or_equiv
  _atom_site_adp_type
  _atom_site_occupancy
  _atom_site_site_symmetry_order
  _atom_site_calc_flag
  _atom_site_refinement_flags_posn
  _atom_site_refinement_flags_adp
  _atom_site_refinement_flags_occupancy
  _atom_site_disorder_assembly
  _atom_site_disorder_group
 I1 I 0.83167(2) 0.22913(4) 0.51790(2) 0.01598(9) Uani 1 1 d . . . . .
 S1' S 0.6172(3) -0.2085(5) 0.72550(8) 0.0212(6) Uani 0.585(6) 1 d . U P A 1
 O2 O 0.4257(3) 1.4818(5) 0.40297(8) 0.0248(6) Uani 1 1 d . . . . .
 O4 O 0.8878(3) 0.9484(5) 0.30792(8) 0.0325(7) Uani 1 1 d . . . . .
 O1 O 0.4173(3) 1.2806(5) 0.46014(10) 0.0284(7) Uani 1 1 d . . . . .
 O3 O 0.7742(4) 1.2817(5) 0.30322(10) 0.0322(7) Uani 1 1 d . . . . .
 N3 N 0.8766(3) -0.0573(6) 0.58900(9) 0.0184(6) Uani 1 1 d . . . . .
 N4 N 0.9385(3) -0.3942(6) 0.62974(9) 0.0213(6) Uani 1 1 d . . . . .
 N2 N 0.8038(3) 1.0946(6) 0.32050(9) 0.0239(7) Uani 1 1 d . . . . .
 N1 N 0.4616(3) 1.3157(6) 0.42567(10) 0.0193(6) Uani 1 1 d . . . . .
 C12 C 0.7914(4) 0.0176(6) 0.61869(10) 0.0172(7) Uani 1 1 d . . . . .
 H12 H 0.7421 0.1621 0.6149 0.021 Uiso 1 1 calc R . . . .
 C1 C 0.7830(3) 0.4667(6) 0.47287(10) 0.0163(7) Uani 1 1 d . . . . .
 C11 C 0.7726(4) -0.1102(6) 0.65522(10) 0.0153(7) Uani 1 1 d . . . . .
 C10 C 0.8528(4) -0.3172(7) 0.65884(11) 0.0200(7) Uani 1 1 d . . . . .
 H10 H 0.8456 -0.4079 0.6834 0.024 Uiso 1 1 calc R . . . .
 C7 C 0.5688(3) 1.1503(6) 0.40970(10) 0.0159(7) Uani 1 1 d . . . . .
 C13 C 0.6715(4) -0.0356(6) 0.68629(10) 0.0175(6) Uani 1 1 d . U . . .
 C9 C 0.9450(4) -0.2613(6) 0.59599(13) 0.0212(8) Uani 1 1 d . . . . .
 H9 H 1.0038 -0.3163 0.5747 0.025 Uiso 1 1 calc R . . . .
 C4 C 0.7775(4) 0.8467(7) 0.38264(10) 0.0162(7) Uani 1 1 d . . . . .
 H4 H 0.8484 0.7434 0.3728 0.019 Uiso 1 1 calc R . . . .
 C5 C 0.7350(4) 1.0439(6) 0.36015(10) 0.0184(7) Uani 1 1 d . . . . .
 C3 C 0.7125(4) 0.8045(6) 0.42034(11) 0.0151(6) Uani 1 1 d . . . . .
 C6 C 0.6313(4) 1.2005(6) 0.37261(11) 0.0175(7) Uani 1 1 d . . . . .
 H6 H 0.6048 1.3346 0.3566 0.021 Uiso 1 1 calc R . . . .
 C16 C 0.4964(4) 0.1798(8) 0.72296(13) 0.0283(8) Uani 1 1 d . U . . .
 H16 H 0.4369 0.3056 0.7309 0.034 Uiso 0.585(6) 1 calc R . P A 1
 H16A H 0.4306 0.2957 0.7315 0.034 Uiso 0.415(6) 1 calc R . P A 2
 C8 C 0.6053(3) 0.9566(6) 0.43379(10) 0.0162(7) Uani 1 1 d . . . . .
 H8 H 0.5588 0.9272 0.4589 0.019 Uiso 1 1 calc R . . . .
 C2 C 0.7552(3) 0.6126(6) 0.44713(10) 0.0155(7) Uani 1 1 d . . . . .
 C15 C 0.5077(4) -0.0259(8) 0.74257(12) 0.0303(8) Uani 1 1 d . U . . .
 H15 H 0.4520 -0.0603 0.7658 0.036 Uiso 0.585(6) 1 calc R . P A 1
 H15A H 0.4542 -0.0762 0.7654 0.036 Uiso 0.415(6) 1 calc R . P A 2
 C14' C 0.593(3) 0.183(3) 0.6861(9) 0.0212(9) Uani 0.585(6) 1 d . U P A 1
 H14' H 0.5998 0.3054 0.6664 0.025 Uiso 0.585(6) 1 calc R . P A 1
 C14 C 0.634(2) -0.175(4) 0.7192(6) 0.0212(6) Uani 0.415(6) 1 d . . P A 2
 H14 H 0.6714 -0.3244 0.7266 0.025 Uiso 0.415(6) 1 calc R . P A 2
 S1 S 0.5965(10) 0.2244(9) 0.6849(3) 0.0212(9) Uani 0.415(6) 1 d . . P A 2

loop_
  _atom_site_aniso_label
  _atom_site_aniso_U_11
  _atom_site_aniso_U_22
  _atom_site_aniso_U_33
  _atom_site_aniso_U_23
  _atom_site_aniso_U_13
  _atom_site_aniso_U_12
 I1 0.01683(14) 0.01536(15) 0.01590(13) 0.00035(7) 0.00212(9) 0.00243(8)
 S1' 0.0244(11) 0.0217(13) 0.0178(12) 0.0005(7) 0.0053(7) -0.0017(8)
 O2 0.0238(13) 0.0185(14) 0.0313(14) 0.0044(11) -0.0047(11) 0.0056(11)
 O4 0.0338(15) 0.0399(19) 0.0252(14) 0.0002(12) 0.0134(12) -0.0037(13)
 O1 0.0303(15) 0.0244(16) 0.0315(16) 0.0020(11) 0.0117(13) 0.0050(11)
 O3 0.0337(16) 0.0376(19) 0.0257(15) 0.0134(12) 0.0041(12) -0.0061(13)
 N3 0.0192(14) 0.0219(17) 0.0145(13) -0.0001(11) 0.0036(11) 0.0019(12)
 N4 0.0199(14) 0.0217(17) 0.0221(15) -0.0006(12) -0.0019(11) 0.0036(12)
 N2 0.0214(15) 0.036(2) 0.0142(13) 0.0009(13) 0.0016(11) -0.0087(14)
 N1 0.0172(14) 0.0119(15) 0.0286(16) -0.0009(13) 0.0004(12) 0.0010(12)
 C12 0.0186(16) 0.0178(18) 0.0154(15) -0.0007(13) 0.0019(12) 0.0007(14)
 C1 0.0129(15) 0.0179(18) 0.0182(15) -0.0005(13) 0.0024(12) 0.0008(13)
 C11 0.0160(15) 0.0171(18) 0.0124(14) -0.0021(12) -0.0042(11) -0.0035(13)
 C10 0.0178(16) 0.025(2) 0.0169(16) 0.0029(14) -0.0044(12) -0.0007(15)
 C7 0.0134(15) 0.0173(18) 0.0169(15) -0.0021(13) -0.0008(12) -0.0009(13)
 C13 0.0179(15) 0.0218(17) 0.0128(13) -0.0035(11) 0.0012(11) -0.0048(12)
 C9 0.0179(17) 0.023(2) 0.0229(18) -0.0021(13) 0.0020(14) 0.0025(14)
 C4 0.0135(15) 0.0187(18) 0.0164(15) -0.0026(13) 0.0004(12) -0.0029(13)
 C5 0.0196(16) 0.0210(19) 0.0147(15) 0.0002(13) 0.0028(12) -0.0068(14)
 C3 0.0159(15) 0.0143(17) 0.0150(15) -0.0008(13) 0.0005(12) -0.0006(13)
 C6 0.0158(15) 0.0164(18) 0.0198(16) 0.0030(13) -0.0037(12) -0.0028(13)
 C16 0.0247(17) 0.0307(19) 0.0302(18) -0.0120(14) 0.0076(14) -0.0030(15)
 C8 0.0144(15) 0.0192(18) 0.0151(14) -0.0002(13) 0.0012(12) -0.0033(13)
 C2 0.0130(15) 0.0165(18) 0.0172(15) -0.0042(13) 0.0028(11) -0.0012(13)
 C15 0.0309(18) 0.039(2) 0.0211(16) -0.0051(14) 0.0046(14) -0.0126(15)
 C14' 0.0239(10) 0.021(2) 0.0196(10) -0.0051(18) 0.0058(7) -0.0006(17)
 C14 0.0244(11) 0.0217(13) 0.0178(12) 0.0005(7) 0.0053(7) -0.0017(8)
 S1 0.0239(10) 0.021(2) 0.0196(10) -0.0051(18) 0.0058(7) -0.0006(17)

_geom_special_details
;
 All esds (except the esd in the dihedral angle between two l.s. planes)
 are estimated using the full covariance matrix.  The cell esds are taken
 into account individually in the estimation of esds in distances, angles
 and torsion angles; correlations between esds in cell parameters are only
 used when they are defined by crystal symmetry.  An approximate (isotropic)
 treatment of cell esds is used for estimating esds involving l.s. planes.
;
loop_
  _geom_bond_atom_site_label_1
  _geom_bond_atom_site_label_2
  _geom_bond_distance
  _geom_bond_site_symmetry_2
  _geom_bond_publ_flag
 I1 C1 2.019(3) . ?
 S1' C13 1.700(4) . ?
 S1' C15 1.574(5) . ?
 O2 N1 1.234(4) . ?
 O4 N2 1.225(4) . ?
 O1 N1 1.218(4) . ?
 O3 N2 1.232(4) . ?
 N3 C12 1.340(4) . ?
 N3 C9 1.341(5) . ?
 N4 C10 1.333(5) . ?
 N4 C9 1.329(5) . ?
 N2 C5 1.483(4) . ?
 N1 C7 1.482(4) . ?
 C12 H12 0.9500 . ?
 C12 C11 1.403(5) . ?
 C1 C2 1.194(5) . ?
 C11 C10 1.400(5) . ?
 C11 C13 1.467(4) . ?
 C10 H10 0.9500 . ?
 C7 C6 1.383(5) . ?
 C7 C8 1.384(5) . ?
 C13 C14' 1.45(2) . ?
 C13 C14 1.386(17) . ?
 C13 S1 1.643(8) . ?
 C9 H9 0.9500 . ?
 C4 H4 0.9500 . ?
 C4 C5 1.386(5) . ?
 C4 C3 1.402(4) . ?
 C5 C6 1.386(5) . ?
 C3 C8 1.404(5) . ?
 C3 C2 1.438(5) . ?
 C6 H6 0.9500 . ?
 C16 H16 0.9500 . ?
 C16 H16A 0.9500 . ?
 C16 C15 1.339(6) . ?
 C16 C14' 1.52(3) . ?
 C16 S1 1.593(9) . ?
 C8 H8 0.9500 . ?
 C15 H15 0.9500 . ?
 C15 H15A 0.9500 . ?
 C15 C14 1.66(2) . ?
 C14' H14' 0.9500 . ?
 C14 H14 0.9500 . ?

loop_
  _geom_angle_atom_site_label_1
  _geom_angle_atom_site_label_2
  _geom_angle_atom_site_label_3
  _geom_angle
  _geom_angle_site_symmetry_1
  _geom_angle_site_symmetry_3
  _geom_angle_publ_flag
 C15 S1' C13 95.2(2) . . ?
 C12 N3 C9 116.7(3) . . ?
 C9 N4 C10 115.9(3) . . ?
 O4 N2 O3 125.2(3) . . ?
 O4 N2 C5 117.2(3) . . ?
 O3 N2 C5 117.6(3) . . ?
 O2 N1 C7 116.8(3) . . ?
 O1 N1 O2 124.9(3) . . ?
 O1 N1 C7 118.2(3) . . ?
 N3 C12 H12 118.9 . . ?
 N3 C12 C11 122.2(3) . . ?
 C11 C12 H12 118.9 . . ?
 C2 C1 I1 177.9(3) . . ?
 C12 C11 C13 122.0(3) . . ?
 C10 C11 C12 115.0(3) . . ?
 C10 C11 C13 122.9(3) . . ?
 N4 C10 C11 123.6(3) . . ?
 N4 C10 H10 118.2 . . ?
 C11 C10 H10 118.2 . . ?
 C6 C7 N1 118.9(3) . . ?
 C6 C7 C8 123.3(3) . . ?
 C8 C7 N1 117.8(3) . . ?
 C11 C13 S1' 123.9(3) . . ?
 C11 C13 S1 121.9(4) . . ?
 C14' C13 S1' 109.9(10) . . ?
 C14' C13 C11 125.9(11) . . ?
 C14 C13 C11 123.2(10) . . ?
 C14 C13 S1 114.9(10) . . ?
 N3 C9 H9 116.8 . . ?
 N4 C9 N3 126.5(3) . . ?
 N4 C9 H9 116.8 . . ?
 C5 C4 H4 121.0 . . ?
 C5 C4 C3 118.0(3) . . ?
 C3 C4 H4 121.0 . . ?
 C4 C5 N2 119.0(3) . . ?
 C4 C5 C6 123.9(3) . . ?
 C6 C5 N2 117.1(3) . . ?
 C4 C3 C8 120.0(3) . . ?
 C4 C3 C2 122.2(3) . . ?
 C8 C3 C2 117.7(3) . . ?
 C7 C6 C5 116.2(3) . . ?
 C7 C6 H6 121.9 . . ?
 C5 C6 H6 121.9 . . ?
 C15 C16 H16 125.0 . . ?
 C15 C16 H16A 121.0 . . ?
 C15 C16 C14' 110.0(8) . . ?
 C15 C16 S1 118.0(4) . . ?
 C14' C16 H16 125.0 . . ?
 S1 C16 H16A 121.0 . . ?
 C7 C8 C3 118.7(3) . . ?
 C7 C8 H8 120.7 . . ?
 C3 C8 H8 120.7 . . ?
 C1 C2 C3 172.5(4) . . ?
 S1' C15 H15 121.4 . . ?
 C16 C15 S1' 117.2(3) . . ?
 C16 C15 H15 121.4 . . ?
 C16 C15 H15A 126.9 . . ?
 C16 C15 C14 106.3(7) . . ?
 C14 C15 H15A 126.9 . . ?
 C13 C14' C16 107.6(14) . . ?
 C13 C14' H14' 126.2 . . ?
 C16 C14' H14' 126.2 . . ?
 C13 C14 C15 105.1(14) . . ?
 C13 C14 H14 127.4 . . ?
 C15 C14 H14 127.4 . . ?
 C16 S1 C13 95.5(4) . . ?

_shelx_res_file
;
    dwat16_0m_a.res created by SHELXL-2014/7

TITL dwat16_0m_a.res in P2(1)/n
REM Old TITL dwat16_0m in P2(1)/n
REM SHELXT solution in P2(1)/n
REM R1 0.081, Rweak 0.005, Alpha 0.092, Orientation as input
REM Formula found by SHELXT: C17 I N3 O5
CELL 0.71073 9.2195 5.7344 32.1204 90 93.209 90
ZERR 2 0.0006 0.0004 0.0016 0 0.003 0
LATT 1
SYMM 0.5-X,0.5+Y,0.5-Z
SFAC C H I N O S
UNIT 64 36 4 16 16 4
RIGU 0.002 0.002 C14' C16 C15 S1' C13
EADP C14 S1'
EADP S1 C14'

L.S. 10
PLAN  20
SIZE 0.08 0.29 0.31
TEMP -173.15
ACTA 50
BOND $H
LIST 6
fmap 2
OMIT 0 0 2
REM <olex2.extras>
REM <HklSrc "%.\\dwat16_0m.hkl">
REM </olex2.extras>

WGHT    0.017300    2.504300
FVAR       0.07791   0.58537
I1    3    0.831667    0.229127    0.517904    11.00000    0.01683    0.01536 =
         0.01590    0.00035    0.00212    0.00243
PART 1
S1'   6    0.617230   -0.208503    0.725504    21.00000    0.02439    0.02173 =
         0.01780    0.00048    0.00533   -0.00166
PART 0
O2    5    0.425725    1.481806    0.402966    11.00000    0.02376    0.01847 =
         0.03135    0.00436   -0.00467    0.00563
O4    5    0.887811    0.948420    0.307915    11.00000    0.03375    0.03993 =
         0.02521    0.00016    0.01339   -0.00369
O1    5    0.417317    1.280567    0.460138    11.00000    0.03031    0.02442 =
         0.03151    0.00201    0.01169    0.00501
O3    5    0.774158    1.281747    0.303218    11.00000    0.03365    0.03762 =
         0.02567    0.01341    0.00411   -0.00614
N3    4    0.876648   -0.057340    0.589003    11.00000    0.01917    0.02186 =
         0.01452   -0.00012    0.00358    0.00186
N4    4    0.938535   -0.394234    0.629743    11.00000    0.01991    0.02168 =
         0.02206   -0.00060   -0.00187    0.00355
N2    4    0.803773    1.094638    0.320496    11.00000    0.02141    0.03616 =
         0.01424    0.00085    0.00157   -0.00874
N1    4    0.461595    1.315679    0.425673    11.00000    0.01719    0.01186 =
         0.02862   -0.00086    0.00037    0.00098
C12   1    0.791418    0.017594    0.618690    11.00000    0.01860    0.01776 =
         0.01543   -0.00074    0.00194    0.00072
AFIX  43
H12   2    0.742081    0.162109    0.614865    11.00000   -1.20000
AFIX   0
C1    1    0.783024    0.466708    0.472870    11.00000    0.01292    0.01792 =
         0.01823   -0.00046    0.00244    0.00082
C11   1    0.772617   -0.110218    0.655223    11.00000    0.01600    0.01708 =
         0.01235   -0.00209   -0.00416   -0.00347
C10   1    0.852768   -0.317247    0.658843    11.00000    0.01778    0.02474 =
         0.01687    0.00289   -0.00444   -0.00066
AFIX  43
H10   2    0.845640   -0.407899    0.683399    11.00000   -1.20000
AFIX   0
C7    1    0.568813    1.150264    0.409699    11.00000    0.01344    0.01729 =
         0.01686   -0.00212   -0.00081   -0.00088
C13   1    0.671548   -0.035579    0.686292    11.00000    0.01790    0.02183 =
         0.01281   -0.00350    0.00120   -0.00482
C9    1    0.944961   -0.261322    0.595991    11.00000    0.01792    0.02294 =
         0.02287   -0.00205    0.00205    0.00246
AFIX  43
H9    2    1.003782   -0.316254    0.574700    11.00000   -1.20000
AFIX   0
C4    1    0.777472    0.846709    0.382635    11.00000    0.01354    0.01866 =
         0.01639   -0.00256    0.00041   -0.00293
AFIX  43
H4    2    0.848444    0.743361    0.372791    11.00000   -1.20000
AFIX   0
C5    1    0.734953    1.043858    0.360152    11.00000    0.01955    0.02104 =
         0.01473    0.00018    0.00277   -0.00678
C3    1    0.712530    0.804516    0.420343    11.00000    0.01586    0.01431 =
         0.01500   -0.00080    0.00047   -0.00056
C6    1    0.631346    1.200490    0.372607    11.00000    0.01581    0.01639 =
         0.01979    0.00301   -0.00368   -0.00275
AFIX  43
H6    2    0.604837    1.334635    0.356577    11.00000   -1.20000
AFIX   0
C16   1    0.496380    0.179849    0.722957    11.00000    0.02473    0.03067 =
         0.03023   -0.01204    0.00757   -0.00302
PART 1
AFIX  43
H16   2    0.436889    0.305643    0.730931    21.00000   -1.20000
AFIX  43
PART 0
PART 2
H16A  2    0.430628    0.295748    0.731469   -21.00000   -1.20000
AFIX   0
PART 0
C8    1    0.605311    0.956603    0.433794    11.00000    0.01440    0.01917 =
         0.01513   -0.00019    0.00120   -0.00334
AFIX  43
H8    2    0.558774    0.927180    0.458917    11.00000   -1.20000
AFIX   0
C2    1    0.755206    0.612639    0.447134    11.00000    0.01298    0.01654 =
         0.01724   -0.00422    0.00284   -0.00125
C15   1    0.507696   -0.025942    0.742573    11.00000    0.03090    0.03929 =
         0.02114   -0.00513    0.00464   -0.01257
PART 1
AFIX  43
H15   2    0.451983   -0.060317    0.765806    21.00000   -1.20000
AFIX  43
PART 0
PART 2
H15A  2    0.454232   -0.076238    0.765365   -21.00000   -1.20000
AFIX   0
PART 0
PART 1
C14'  1    0.592705    0.182685    0.686050    21.00000    0.02390    0.02071 =
         0.01961   -0.00512    0.00582   -0.00056
AFIX  43
H14'  2    0.599833    0.305422    0.666405    21.00000   -1.20000
AFIX   0
PART 0
PART 2
C14   1    0.633517   -0.175211    0.719155   -21.00000    0.02439    0.02173 =
         0.01780    0.00048    0.00533   -0.00166
AFIX  43
H14   2    0.671445   -0.324398    0.726637   -21.00000   -1.20000
AFIX   0
S1    6    0.596540    0.224378    0.684914   -21.00000    0.02390    0.02071 =
         0.01961   -0.00512    0.00582   -0.00056
HKLF 4

REM  dwat16_0m_a.res in P2(1)/n
REM R1 =  0.0438 for    3944 Fo > 4sig(Fo)  and  0.0470 for all    4232 data
REM    242 parameters refined using     30 restraints

END

WGHT      0.0172      2.5080

REM Highest difference peak  0.650,  deepest hole -0.990,  1-sigma level  0.150
Q1    1   0.6056  1.0895  0.4282  11.00000  0.05    0.65
Q2    1   0.5293  0.2319  0.7072  11.00000  0.05    0.61
Q3    1   0.7914  1.0887  0.3445  11.00000  0.05    0.58
Q4    1   0.5543 -0.1028  0.7429  11.00000  0.05    0.57
Q5    1   1.0123 -0.3628  0.6451  11.00000  0.05    0.56
Q6    1   0.7747  0.3062  0.5279  11.00000  0.05    0.55
Q7    1   0.6439  0.2152  0.4851  11.00000  0.05    0.52
Q8    1   0.7900  1.2265  0.2632  11.00000  0.05    0.52
Q9    1   0.4651  0.8824  0.4600  11.00000  0.05    0.51
Q10   1   0.9061  0.0112  0.5744  11.00000  0.05    0.50
Q11   1   0.9164  0.7060  0.3658  11.00000  0.05    0.50
Q12   1   0.9344 -0.3425  0.6098  11.00000  0.05    0.50
Q13   1   0.6574  0.3195  0.6918  11.00000  0.05    0.50
Q14   1   0.8396  0.4223  0.5240  11.00000  0.05    0.49
Q15   1   0.5331  1.2138  0.4227  11.00000  0.05    0.49
Q16   1   0.8537  0.2434  0.5398  11.00000  0.05    0.49
Q17   1   0.5999  0.0537  0.6814  11.00000  0.05    0.48
Q18   1   0.8874 -0.0190  0.5657  11.00000  0.05    0.48
Q19   1   0.4968  0.0675  0.7420  11.00000  0.05    0.48
Q20   1   0.8362  0.0774  0.5192  11.00000  0.05    0.47
;
_shelx_res_checksum               22725
_shelx_hkl_file
;
  -1   0   0   -0.01    0.01
   1   0   0    0.02    0.02
   1   0   0   -0.01    0.02
  -1   0   0    0.01    0.02
   2   0   0   88.13    8.93
  -2   0   0   87.07    8.94
   2   0   0   95.59    8.94
   3   0   0   -0.08    0.05
   3   0   0   -0.01    0.04
  -3   0   0    0.02    0.06
   4   0   0   52.05    4.67
   4   0   0   48.82    4.67
  -4   0   0   39.10    4.66
   5   0   0    0.01    0.07
  -5   0   0    0.13    0.09
   5   0   0    0.09    0.08
  -6   0   0   17.09    1.79
   6   0   0   17.05    1.77
   7   0   0    0.09    0.11
  -7   0   0    0.09    0.11
   7   0   0   -0.05    0.09
  -8   0   0    5.98    0.82
   8   0   0    8.14    0.85
  -9   0   0    0.13    0.15
   9   0   0    0.24    0.17
 -10   0   0    1.43    0.35
  10   0   0    1.64    0.36
 -11   0   0    0.94    0.30
  11   0   0    0.38    0.24
  12   0   0   10.69    1.24
 -12   0   0    9.55    1.25
   0  -1   0    0.08    0.04
   0  -1   0    0.01    0.04
  -1  -1   0    1.86    0.20
   1  -1   0    1.66    0.24
  -1  -1   0    1.85    0.23
  -1  -1   0    1.93    0.22
  -1  -1   0    1.96    0.20
   1  -1   0    2.01    0.23
   1   1   0    2.01    0.22
   1   1   0    1.98    0.21
  -2  -1   0  100.11   10.65
   2  -1   0  101.07   10.69
   2  -1   0   98.85   10.63
   2  -1   0  114.70   10.66
  -2  -1   0  103.56   10.66
  -2   1   0  122.81   10.65
   2   1   0  112.44   10.66
   3  -1   0   10.79    1.00
   3  -1   0    9.87    1.04
  -3  -1   0    9.14    1.00
   3   1   0    9.71    1.01
  -3   1   0    8.87    1.00
   4  -1   0  172.84   16.08
   4  -1   0  143.63   16.06
   4  -1   0  166.09   16.13
  -4  -1   0  171.73   16.10
  -4   1   0  159.10   16.09
  -5  -1   0    0.19    0.10
   5  -1   0    0.10    0.05
   5  -1   0    0.01    0.10
   5  -1   0    0.14    0.08
  -5   1   0    0.14    0.08
   5   1   0    0.19    0.10
   6  -1   0    3.33    0.36
   6  -1   0    2.75    0.39
  -6  -1   0    3.05    0.41
   6  -1   0    3.22    0.49
   6   1   0    3.49    0.48
  -6   1   0    3.18    0.47
   7  -1   0   -0.01    0.14
  -7  -1   0    0.45    0.16
   7  -1   0    0.45    0.15
   7   1   0    0.35    0.16
  -7   1   0    0.38    0.16
  -8  -1   0   35.14    3.31
   8  -1   0   31.84    3.28
   8  -1   0   31.20    3.31
  -8   1   0   34.39    3.33
   8   1   0   28.24    3.30
   9  -1   0    0.65    0.22
  -9  -1   0    0.38    0.20
  -9   1   0    0.68    0.25
   9   1   0    0.64    0.24
 -10  -1   0   16.64    1.87
  10  -1   0   17.17    1.82
 -10   1   0   17.52    1.87
  10   1   0   16.22    1.86
  11  -1   0    0.80    0.27
 -11   1   0   -0.02    0.15
  11   1   0    2.27    0.41
 -12  -1   0    2.65    0.54
  12   1   0    2.61    0.54
 -12   1   0    3.31    0.63
   0  -2   0  221.28   24.79
   0  -2   0  280.10   24.81
  -1  -2   0    6.41    0.73
  -1  -2   0    6.38    0.74
   1  -2   0    5.85    0.73
   1   2   0    7.17    0.67
   1   2   0    7.03    0.68
   2  -2   0   11.40    1.36
  -2  -2   0   12.46    1.34
   2  -2   0   13.25    1.40
  -2  -2   0   15.83    1.39
   2   2   0   13.81    1.33
  -2   2   0   12.79    1.30
   3  -2   0    6.73    0.67
   3  -2   0    5.23    0.70
  -3  -2   0    5.64    0.68
  -3  -2   0    5.83    0.63
   3   2   0    6.60    0.66
   4  -2   0   32.55    4.00
   4  -2   0   37.71    3.90
  -4  -2   0   41.13    3.94
   4  -2   0   42.84    3.96
  -4   2   0   38.70    3.94
   4   2   0   43.40    3.97
   5  -2   0    0.09    0.05
   5  -2   0    0.16    0.08
   5  -2   0   -0.13    0.09
  -5  -2   0    0.06    0.08
   5   2   0    0.04    0.09
  -5   2   0    0.01    0.07
   6  -2   0   55.05    5.48
  -6  -2   0   61.45    5.54
   6  -2   0   53.89    5.50
   6  -2   0   52.87    5.59
   6   2   0   53.65    5.55
  -6   2   0   53.28    5.53
  -7  -2   0    9.98    1.25
   7  -2   0   12.06    1.22
   7  -2   0   13.06    1.36
   7   2   0   12.94    1.31
  -7   2   0   11.10    1.28
  -8  -2   0   11.01    1.13
   8  -2   0   10.08    1.06
   8  -2   0    8.43    1.14
   8   2   0   10.80    1.15
  -8   2   0    9.13    1.12
   9  -2   0    0.75    0.28
  -9   2   0    1.41    0.31
   9   2   0    1.00    0.28
 -10  -2   0    5.74    0.75
 -10   2   0    5.89    0.87
  10   2   0    5.82    0.87
 -11  -2   0    7.34    0.91
 -11   2   0    6.49    0.99
  11   2   0    7.23    0.93
   0  -3   0    0.00    0.07
   0  -3   0   -0.06    0.07
   1  -3   0    3.11    0.50
   1  -3   0    3.49    0.45
  -1  -3   0    3.36    0.43
  -1  -3   0    3.40    0.44
   2  -3   0   89.54    9.16
  -2  -3   0  100.31    9.14
   2  -3   0   94.21    9.13
  -2  -3   0   85.48    9.09
   2   3   0   88.52    9.05
  -3  -3   0    4.10    0.45
  -3  -3   0    3.57    0.50
   3  -3   0    3.82    0.55
   3  -3   0    4.68    0.51
   3   3   0    4.09    0.46
  -3   3   0    3.83    0.42
   4  -3   0   58.03    5.23
  -4  -3   0   42.20    5.12
  -4  -3   0   50.23    5.04
   4  -3   0   55.74    5.13
  -4   3   0   51.84    5.07
   4   3   0   48.89    5.10
  -5  -3   0   22.68    2.17
   5  -3   0   20.10    2.30
   5  -3   0   22.63    2.22
  -5   3   0   20.36    2.18
   5   3   0   20.55    2.21
   6  -3   0    0.17    0.11
  -6  -3   0    0.04    0.08
   6  -3   0    0.08    0.16
   6   3   0    0.07    0.12
  -6   3   0    0.11    0.10
  -7  -3   0    0.63    0.15
   7  -3   0    0.53    0.26
   7   3   0    0.13    0.15
  -7   3   0    0.16    0.13
   8  -3   0   14.17    1.62
  -8  -3   0   13.77    1.51
  -8   3   0   14.00    1.55
   8   3   0   14.51    1.57
  -9  -3   0    4.76    0.65
   9  -3   0    4.94    0.83
   9   3   0    5.61    0.81
  -9   3   0    5.95    0.71
  10  -3   0    8.23    1.08
  10   3   0    7.86    1.03
 -10   3   0    8.88    1.04
  11   3   0    2.97    0.58
 -11   3   0    1.67    0.51
   0  -4   0  116.15   11.21
   0  -4   0  107.69   11.19
   1  -4   0   17.18    1.77
  -1  -4   0   15.95    1.76
   1  -4   0   16.44    1.78
  -1  -4   0   15.83    1.74
   2  -4   0   10.39    1.01
   2  -4   0    7.14    0.91
  -2  -4   0    7.41    0.89
  -2  -4   0    6.71    0.90
   2   4   0    8.08    0.82
   3  -4   0   11.47    1.38
   3  -4   0   13.84    1.47
  -3  -4   0   11.85    1.33
  -3  -4   0   11.22    1.39
   3   4   0   14.53    1.33
   4  -4   0   23.36    2.53
  -4  -4   0   24.63    2.54
   4  -4   0   22.83    2.60
   4   4   0   25.30    2.48
   5  -4   0   12.92    1.50
  -5  -4   0   13.04    1.42
   5  -4   0   11.82    1.40
   5   4   0   13.19    1.38
   6  -4   0   33.43    3.32
   6  -4   0   27.40    3.17
   6   4   0   32.27    3.19
   7  -4   0    9.87    1.17
   7   4   0    8.32    1.04
   8  -4   0    5.75    0.93
   8   4   0    5.81    0.77
   9  -4   0    0.75    0.34
   9   4   0    2.22    0.40
  10  -4   0    0.87    0.37
 -10   4   0    0.23    0.24
  10   4   0    0.42    0.29
   0  -5   0    0.09    0.14
   0  -5   0    0.13    0.15
   1  -5   0    1.02    0.30
  -1  -5   0    0.91    0.27
  -1  -5   0    0.65    0.24
   1  -5   0    1.15    0.31
  -2  -5   0   35.66    3.45
  -2  -5   0   33.00    3.48
   2  -5   0   33.69    3.51
   2  -5   0   30.30    3.45
   3  -5   0    3.76    0.69
   3  -5   0    3.67    0.62
  -3  -5   0    4.54    0.67
  -4  -5   0   31.01    3.15
   4  -5   0   27.92    3.20
   4  -5   0   30.53    3.14
  -5  -5   0    5.05    0.73
   5  -5   0    3.73    0.66
   5  -5   0    5.06    0.83
   6  -5   0    1.77    0.49
   7  -5   0    0.66    0.31
   7   5   0    0.30    0.19
   8  -5   0    4.55    0.91
   8   5   0    6.15    0.84
   9  -5   0   16.95    2.19
   9   5   0   20.62    2.11
   0  -6   0    9.76    1.21
   1  -6   0    5.60    0.94
  -1  -6   0    8.63    0.95
  -1  -6   0    6.36    0.88
   1  -6   0    6.88    0.92
   2  -6   0    6.97    0.83
  -2  -6   0    5.05    0.85
   2  -6   0    5.11    0.89
   3  -6   0    0.06    0.23
   3  -6   0    0.02    0.19
  -3  -6   0    0.25    0.20
   4  -6   0    5.79    0.88
  -4  -6   0    5.64    0.87
   4  -6   0    6.01    0.98
   5  -6   0    5.09    0.81
   5  -6   0    5.20    0.94
   6  -6   0    6.30    1.07
   7  -6   0    8.30    1.32
   0  -7   0    0.16    0.22
  -1  -7   0    1.07    0.38
   1  -7   0    1.22    0.38
  -2  -7   0    2.86    0.58
   2  -7   0    2.34    0.58
   2  -7   0    3.00    0.61
   3  -7   0    7.33    1.17
  -3  -7   0    5.75    1.01
   3  -7   0    8.83    1.04
   4  -7   0    9.52    1.16
  -4  -7   0    9.63    1.15
   4  -7   0    6.51    1.25
  12   0  -1    2.76    0.51
  11   0  -1    4.89    0.80
 -11   0   1    6.39    0.87
  10   0  -1    0.38    0.22
 -10   0   1    1.85    0.33
   9   0  -1   36.23    3.50
  -9   0   1   31.56    3.49
   8   0  -1    0.13    0.14
  -8   0   1    0.30    0.15
  -7   0   1    7.76    0.87
   7   0  -1    6.60    0.84
   7   0  -1    7.93    0.84
   6   0  -1   -0.01    0.08
   6   0  -1   -0.01    0.07
  -6   0   1    0.05    0.09
  -5   0   1  119.09   14.01
   5   0  -1  148.52   14.02
   5   0  -1  155.91   14.01
  -4   0   1    0.02    0.06
   4   0  -1   -0.04    0.04
   4   0  -1   -0.06    0.04
  -3   0   1  557.27   56.43
   3   0  -1  583.04   56.44
   2   0  -1   -0.03    0.03
   2   0  -1    0.09    0.05
  -2   0   1   -0.02    0.04
   1   0  -1    0.39    0.06
   1   0  -1    0.43    0.07
  -1   0   1    0.48    0.07
  -1   0  -1   22.14    2.26
  -1   0  -1   20.31    2.26
   1   0   1   25.82    2.26
   2   0   1   -0.04    0.04
   2   0   1    0.00    0.04
  -2   0  -1   -0.05    0.04
   3   0   1   74.96    6.69
   3   0   1   69.76    6.68
  -3   0  -1   57.34    6.68
   4   0   1   -0.05    0.05
  -4   0  -1    0.03    0.06
   4   0   1    0.04    0.06
   5   0   1   47.89    5.64
   5   0   1   62.57    5.64
  -5   0  -1   58.59    5.65
   6   0   1    0.05    0.09
   6   0   1   -0.04    0.07
  -6   0  -1    0.20    0.11
   7   0   1   23.79    2.26
  -7   0  -1   19.52    2.27
   8   0   1    0.00    0.13
  -8   0  -1   -0.08    0.12
  -9   0  -1   32.45    3.46
   9   0   1   34.12    3.45
  10   0   1    0.90    0.25
 -10   0  -1    0.34    0.20
  11   0   1    0.65    0.30
 -11   0  -1    0.48    0.27
  12   0   1    0.48    0.25
 -12   0  -1    1.44    0.38
 -12  -1   1    1.89    0.45
  12   1  -1    2.06    0.46
 -12   1   1    1.52    0.42
  11  -1  -1   15.15    1.67
 -11  -1   1   16.75    1.71
  11   1  -1   15.83    1.71
 -11   1   1   12.96    1.69
 -10  -1   1    1.99    0.36
  10  -1  -1    1.33    0.30
  -9  -1   1    2.54    0.46
   9  -1  -1    2.81    0.46
  -9   1   1    3.05    0.51
   9   1  -1    3.07    0.52
   8  -1  -1    1.13    0.31
   8  -1  -1    1.87    0.32
  -8  -1   1    1.67    0.32
  -8   1   1    1.50    0.32
   8   1  -1    1.56    0.33
   7  -1  -1   68.83    7.47
   7  -1  -1   81.23    7.53
  -7  -1   1   70.25    7.49
  -7   1   1   86.66    7.52
   7   1  -1   68.27    7.50
   6  -1  -1    0.08    0.11
   6  -1  -1    0.19    0.06
   6  -1  -1    0.03    0.09
  -6  -1   1    0.31    0.13
   6   1  -1    0.27    0.13
   6   1  -1    0.20    0.06
  -6   1   1    0.04    0.09
   5  -1  -1  147.29   14.55
   5  -1  -1  157.69   14.51
  -5  -1   1  141.65   14.56
   5  -1  -1  158.49   14.60
   5   1  -1  154.21   14.50
   5   1  -1  135.95   14.56
  -5   1   1  130.79   14.55
   4  -1  -1    8.28    0.89
   4  -1  -1    8.71    0.82
  -4  -1   1    8.28    0.85
   4  -1  -1    7.00    0.83
   4   1  -1    6.91    0.85
   4   1  -1    7.79    0.80
  -4   1   1    8.62    0.85
   3  -1  -1   20.27    1.93
   3  -1  -1   18.19    1.98
   3  -1  -1   20.15    1.93
  -3  -1   1   17.94    1.94
   3   1  -1   19.97    1.90
   3   1  -1   18.89    1.95
  -3   1   1   18.38    1.94
   2  -1  -1    3.80    0.40
   2  -1  -1    3.91    0.45
  -2  -1   1    3.44    0.42
   2  -1  -1    3.31    0.41
  -2  -1   1    4.86    0.42
   2   1  -1    4.00    0.42
  -2   1   1    3.98    0.41
   2   1  -1    3.84    0.39
  -1  -1   1   65.78    6.81
  -1  -1   1   65.25    6.83
  -1  -1   1   72.10    6.80
  -1  -1   1   72.85    6.80
   1   1  -1   67.69    6.80
   0  -1  -1   26.97    3.00
   0  -1  -1   33.58    3.02
   0  -1   1   29.94    3.01
   1  -1   1   80.86    8.29
  -1  -1  -1   95.33    8.30
  -1  -1  -1   79.50    8.28
  -1  -1  -1   84.47    8.27
  -1  -1  -1   80.86    8.27
   1  -1   1   77.18    8.31
   1   1   1   87.77    8.29
   1   1   1   83.82    8.27
  -2  -1  -1   40.27    3.91
   2  -1   1   43.85    3.95
   2  -1   1   34.23    3.89
  -2   1  -1   38.27    3.90
   2   1   1   41.00    3.91
   3  -1   1    0.04    0.04
  -3  -1  -1    0.08    0.06
   3  -1   1    0.06    0.07
   3  -1   1    0.06    0.05
   3   1   1   -0.02    0.05
  -3   1  -1    0.11    0.05
   4  -1   1    3.62    0.42
   4  -1   1    3.86    0.46
  -4   1  -1    3.82    0.43
   4   1   1    3.32    0.44
   5  -1   1   76.78    8.25
  -5  -1  -1   73.24    8.27
   5  -1   1   79.22    8.30
   5   1   1   93.10    8.30
  -5   1  -1   93.83    8.29
   6  -1   1    8.08    0.89
  -6  -1  -1    6.72    0.86
   6  -1   1    7.48    0.84
  -6   1  -1    9.81    0.89
   6   1   1    6.81    0.86
   7  -1   1   23.18    2.44
   7  -1   1   23.98    2.41
  -7  -1  -1   23.78    2.43
  -7   1  -1   21.99    2.43
   7   1   1   23.83    2.44
   8  -1   1   -0.05    0.16
  -8  -1  -1    0.32    0.16
   8  -1   1    0.20    0.13
   8   1   1    0.30    0.16
  -8   1  -1    0.44    0.17
  -9  -1  -1    0.14    0.16
   9  -1   1   -0.15    0.11
   9   1   1   -0.07    0.13
  -9   1  -1    0.13    0.16
 -10   1  -1    3.32    0.57
  11  -1   1   10.49    1.25
 -11  -1  -1   12.35    1.28
 -11   1  -1    9.53    1.29
  11   1   1   10.86    1.31
 -12  -1  -1    0.66    0.29
  12   1   1    0.59    0.33
 -12   1  -1    0.78    0.30
 -11  -2   1    7.08    0.95
 -11   2   1    7.24    1.00
  11   2  -1    9.06    1.05
 -10  -2   1    3.06    0.55
 -10   2   1    3.41    0.59
  10   2  -1    3.47    0.60
   9  -2  -1   43.71    4.38
  -9  -2   1   42.87    4.32
   9   2  -1   39.22    4.34
  -9   2   1   42.98    4.34
   8  -2  -1    2.09    0.43
  -8  -2   1    2.37    0.40
   8  -2  -1    2.27    0.33
  -8   2   1    2.28    0.43
   8   2  -1    2.36    0.43
   7  -2  -1   22.23    2.23
  -7  -2   1   22.92    2.28
   7  -2  -1   21.04    2.34
  -7   2   1   20.77    2.29
   7   2  -1   22.47    2.31
   6  -2  -1    0.02    0.14
   6  -2  -1    0.03    0.07
  -6  -2   1    0.23    0.11
   6  -2  -1    0.14    0.07
   6   2  -1    0.28    0.14
  -6   2   1    0.04    0.08
  -5  -2   1   48.81    4.68
   5  -2  -1   47.38    4.63
   5  -2  -1   48.41    4.67
   5  -2  -1   40.47    4.73
   5   2  -1   52.59    4.71
  -5   2   1   41.74    4.67
   4  -2  -1   11.55    1.13
   4  -2  -1   10.24    1.18
  -4  -2   1   11.05    1.20
  -4  -2   1   11.90    1.18
   4  -2  -1   13.83    1.28
  -4   2   1    9.89    1.17
   4   2  -1   11.64    1.20
   3  -2  -1  166.19   16.39
  -3  -2   1  163.67   16.41
  -3  -2   1  166.15   16.35
  -3   2   1  165.69   16.36
   2  -2  -1   12.05    1.39
  -2  -2   1   14.02    1.33
   2  -2  -1   14.98    1.37
  -2  -2   1   10.84    1.36
   2   2  -1   13.93    1.33
  -2   2   1   12.51    1.30
   1  -2  -1    5.82    0.76
  -1  -2   1    7.68    0.76
  -1  -2   1    7.92    0.78
   1  -2  -1    8.54    0.81
   1   2  -1    6.57    0.70
   0  -2   1    1.87    0.31
   0  -2  -1    2.13    0.30
   0  -2   1    2.20    0.30
   0  -2  -1    3.14    0.33
   1  -2   1   26.44    2.72
  -1  -2  -1   24.39    2.71
  -1  -2  -1   25.28    2.70
   1   2   1   29.83    2.65
   2  -2   1    1.44    0.23
  -2  -2  -1    1.27    0.22
  -2  -2  -1    1.44    0.18
   2  -2   1    1.54    0.27
  -2   2  -1    1.24    0.14
   2   2   1    1.17    0.16
  -3  -2  -1   28.43    2.83
  -3  -2  -1   26.67    2.87
   3  -2   1   31.50    2.87
   3  -2   1   27.43    2.92
  -3   2  -1   29.08    2.83
   3   2   1   26.55    2.85
   4  -2   1   15.96    1.49
   4  -2   1   15.53    1.57
   4  -2   1   14.22    1.43
  -4  -2  -1   12.75    1.47
   4   2   1   12.00    1.48
  -4   2  -1   16.25    1.48
   5  -2   1   10.46    1.16
   5  -2   1   10.13    1.19
  -5  -2  -1   12.21    1.21
   5  -2   1   10.53    1.27
   5   2   1   13.73    1.25
  -5   2  -1   12.54    1.21
   6  -2   1    0.15    0.16
   6  -2   1    0.16    0.09
   6  -2   1    0.26    0.09
  -6  -2  -1    0.22    0.11
  -6   2  -1    0.19    0.12
   6   2   1    0.18    0.12
   7  -2   1    6.04    0.71
  -7  -2  -1    6.41    0.75
   7  -2   1    5.72    0.80
   7   2   1    8.38    0.81
  -7   2  -1    6.41    0.77
   8  -2   1    4.96    0.61
  -8  -2  -1    6.13    0.68
   8  -2   1    5.97    0.73
  -8   2  -1    4.74    0.67
   8   2   1    5.43    0.69
  -9  -2  -1   43.49    4.54
   9  -2   1   49.62    4.62
   9   2   1   48.22    4.59
  -9   2  -1   37.48    4.55
 -10  -2  -1    5.78    0.73
  10   2   1    4.97    0.80
 -10   2  -1    5.78    0.84
 -11  -2  -1    9.22    1.04
  11   2   1    7.39    1.04
 -11   2  -1    7.56    1.12
 -11   3   1   10.57    1.34
  11   3  -1   11.57    1.34
  10  -3  -1    1.16    0.40
 -10   3   1    1.36    0.33
  10   3  -1    2.75    0.46
  -9  -3   1    0.25    0.16
   9  -3  -1   -0.11    0.17
   9   3  -1    0.13    0.16
  -9   3   1    0.13    0.17
  -8  -3   1    9.54    1.04
   8  -3  -1    8.92    1.16
  -8   3   1    9.39    1.08
   8   3  -1    9.63    1.11
  -7  -3   1   29.02    3.00
   7  -3  -1   31.16    3.15
  -7   3   1   32.34    3.04
   7   3  -1   25.66    3.04
  -6  -3   1    2.32    0.33
   6  -3  -1    2.29    0.36
   6  -3  -1    2.33    0.48
   6   3  -1    1.74    0.37
  -6   3   1    2.49    0.38
   5  -3  -1   45.92    5.14
   5  -3  -1   47.59    5.06
  -5  -3   1   54.27    5.02
   5   3  -1   46.16    5.06
  -5   3   1   55.86    5.04
   4  -3  -1    0.07    0.11
   4  -3  -1   -0.02    0.09
  -4  -3   1    0.18    0.12
  -4  -3   1    0.04    0.04
   4   3  -1    0.13    0.09
  -4   3   1    0.05    0.06
   3  -3  -1    1.38    0.29
  -3  -3   1    1.44    0.30
   3  -3  -1    1.66    0.35
   3   3  -1    1.91    0.27
  -3   3   1    1.81    0.20
  -2  -3   1    2.16    0.35
   2  -3  -1    1.58    0.33
  -2  -3   1    1.26    0.26
   2  -3  -1    1.85    0.32
   2   3  -1    1.79    0.21
  -1  -3   1   83.86    8.58
   1  -3  -1   80.48    8.59
   1  -3  -1   94.06    8.63
   0  -3  -1   12.08    1.42
   0  -3  -1   14.73    1.44
   0  -3   1   13.49    1.44
   1  -3   1   80.69    8.05
  -1  -3  -1   81.50    8.04
  -1  -3  -1   79.11    8.05
  -2  -3  -1   23.20    2.27
   2  -3   1   19.04    2.24
  -2  -3  -1   21.99    2.23
   2   3   1   22.57    2.18
   3  -3   1    4.01    0.56
   3  -3   1    6.27    0.67
  -3  -3  -1    4.53    0.58
  -3  -3  -1    5.46    0.54
  -3   3  -1    4.39    0.49
   3   3   1    4.60    0.53
  -4  -3  -1    6.34    0.62
   4  -3   1    4.83    0.65
   4  -3   1    4.17    0.57
  -4  -3  -1    4.72    0.50
   4   3   1    4.35    0.55
  -5  -3  -1   48.71    5.15
   5  -3   1   52.52    5.30
   5  -3   1   56.52    5.22
   5   3   1   45.32    5.19
  -5   3  -1   55.92    5.18
   6  -3   1   14.46    1.39
  -6  -3  -1   10.53    1.21
   6  -3   1   13.00    1.26
   6   3   1    9.52    1.25
  -6   3  -1   11.60    1.24
   7  -3   1    9.88    1.19
  -7  -3  -1    9.98    1.07
  -7   3  -1    9.75    1.10
   7   3   1    9.62    1.12
   8  -3   1    0.66    0.28
  -8  -3  -1    0.95    0.23
  -8   3  -1    0.96    0.25
  -9  -3  -1    0.70    0.23
   9  -3   1    0.64    0.32
   9   3   1    0.54    0.26
  -9   3  -1    0.97    0.29
  10  -3   1    0.02    0.20
 -10   3  -1    1.22    0.32
 -11   3  -1    7.64    1.03
  11   3   1    8.26    1.07
  10  -4  -1    3.14    0.64
  10   4  -1    1.42    0.45
 -10   4   1    1.92    0.52
   9  -4  -1   17.43    1.81
   9   4  -1   12.86    1.69
   8  -4  -1    1.42    0.42
   8   4  -1    2.22    0.43
   7  -4  -1    6.68    0.87
   7   4  -1    5.14    0.71
   6  -4  -1    1.05    0.27
   6  -4  -1    1.17    0.36
   6   4  -1    0.80    0.24
   5  -4  -1   22.99    2.45
  -5  -4   1   26.38    2.49
   5  -4  -1   21.19    2.53
   5   4  -1   22.95    2.42
  -4  -4   1    6.31    0.77
   4  -4  -1    5.93    0.82
   4  -4  -1    5.77    0.74
   4   4  -1    6.16    0.69
  -3  -4   1   59.08    6.65
   3  -4  -1   62.24    6.71
   3   4  -1   74.82    6.58
   2  -4  -1    2.87    0.52
  -2  -4   1    2.63    0.46
   2  -4  -1    2.56    0.45
  -2  -4   1    2.64    0.43
   2   4  -1    3.03    0.33
  -1  -4   1    0.84    0.25
   1  -4  -1    1.16    0.27
  -1  -4   1    0.82    0.23
   1  -4  -1    1.73    0.35
   0  -4   1    7.80    0.83
   0  -4  -1    8.45    0.85
   0  -4  -1    5.56    0.79
   0  -4   1    5.84    0.80
   1  -4   1   15.78    1.85
  -1  -4  -1   16.91    1.83
  -1  -4  -1   18.76    1.85
   1  -4   1   17.33    1.85
  -2  -4  -1   20.53    2.02
   2  -4   1   17.14    2.07
   2  -4   1   20.63    2.07
  -2  -4  -1   17.15    2.04
   2   4   1   20.03    1.94
  -3  -4  -1   30.77    3.05
   3  -4   1   28.18    3.15
  -3  -4  -1   32.11    3.12
   3  -4   1   26.52    3.08
   3   4   1   31.10    3.02
   4  -4   1   66.63    5.77
   4  -4   1   51.09    5.80
  -4  -4  -1   49.17    5.73
   4   4   1   59.78    5.69
   5  -4   1   11.63    1.54
   5  -4   1   15.09    1.50
   5   4   1   13.63    1.46
   6  -4   1    1.13    0.28
   6  -4   1    0.85    0.31
   6   4   1    1.06    0.28
   7  -4   1   10.83    1.31
   7   4   1   10.24    1.20
   8  -4   1    6.86    0.90
   8   4   1    4.86    0.85
   9  -4   1   27.87    2.97
   9   4   1   26.20    2.91
  10  -4   1    2.09    0.54
  10   4   1    1.55    0.46
 -10   4  -1    1.96    0.49
   9  -5  -1   -0.01    0.25
   9   5  -1    2.17    0.40
   8  -5  -1    2.64    0.64
   8   5  -1    2.29    0.52
   7  -5  -1   28.65    2.76
   7   5  -1   21.46    2.55
   6  -5  -1    1.45    0.43
   5  -5  -1    8.47    1.09
  -5  -5   1    8.30    0.99
   5  -5  -1    7.37    0.97
   4  -5  -1    1.06    0.36
  -4  -5   1    1.19    0.33
   4  -5  -1    1.80    0.38
  -3  -5   1   11.03    1.29
   3  -5  -1   11.17    1.29
   2  -5  -1   10.83    1.23
  -2  -5   1   10.09    1.17
   2  -5  -1    8.22    1.14
  -2  -5   1   10.36    1.13
  -1  -5   1   33.03    3.50
   1  -5  -1   32.74    3.51
  -1  -5   1   35.49    3.53
   0  -5   1   16.53    1.86
   0  -5  -1   16.99    1.86
   0  -5  -1   17.18    1.86
   0  -5   1   16.84    1.86
   1  -5   1   25.50    2.34
  -1  -5  -1   20.75    2.28
   1  -5   1   19.13    2.30
  -1  -5  -1   21.08    2.31
  -2  -5  -1   10.32    1.21
   2  -5   1   10.42    1.27
  -2  -5  -1   10.23    1.24
   2  -5   1   11.74    1.26
  -3  -5  -1    4.33    0.67
   3  -5   1    3.81    0.64
   3  -5   1    4.07    0.70
   4  -5   1    6.44    0.82
   4  -5   1    6.68    0.88
  -4  -5  -1    5.59    0.87
   5  -5   1   16.92    2.10
   5  -5   1   20.14    2.05
   6  -5   1   33.14    3.10
   6  -5   1   24.26    3.07
   7  -5   1    9.53    1.22
   7   5   1    8.58    1.06
   8  -5   1    1.05    0.41
   8   5   1    0.87    0.30
   9   5   1    3.26    0.59
   7  -6  -1    3.96    0.81
   6  -6  -1    0.00    0.25
   5  -6  -1    1.54    0.42
  -5  -6   1    1.77    0.42
   5  -6  -1    2.02    0.54
  -4  -6   1   13.43    1.50
   4  -6  -1   11.32    1.54
   4  -6  -1   13.20    1.49
   3  -6  -1   13.49    1.53
   3  -6  -1   10.36    1.52
  -3  -6   1   16.18    1.58
   2  -6  -1    6.80    0.94
  -2  -6   1    7.11    0.92
   2  -6  -1    6.83    0.91
  -1  -6   1    7.46    1.06
   1  -6  -1    9.62    1.15
   1  -6  -1   11.12    1.16
  -1  -6   1    8.48    1.11
   0  -6  -1    0.90    0.33
   0  -6   1    1.24    0.36
   0  -6   1    1.16    0.36
   0  -6  -1    0.86    0.32
   1  -6   1    9.81    1.25
   1  -6   1   11.91    1.28
  -1  -6  -1    9.55    1.22
  -1  -6  -1   10.30    1.25
  -2  -6  -1   10.14    1.24
   2  -6   1   10.55    1.29
   2  -6   1    9.87    1.25
   3  -6   1    9.36    1.31
   3  -6   1   10.67    1.29
  -3  -6  -1   11.59    1.29
  -4  -6  -1   25.05    2.46
   4  -6   1   20.21    2.43
   4  -6   1   21.71    2.51
   5  -6   1    3.09    0.66
   5  -6   1    2.80    0.57
   6  -6   1    1.18    0.45
   7  -6   1    0.98    0.46
   4  -7  -1    1.39    0.49
  -3  -7   1    1.50    0.43
   3  -7  -1    1.21    0.38
   3  -7  -1    1.23    0.44
  -2  -7   1    2.55    0.56
   2  -7  -1    2.65    0.56
   2  -7  -1    2.21    0.56
  -1  -7   1    2.29    0.52
   1  -7  -1    1.85    0.51
   1  -7  -1    2.43    0.53
   0  -7   1   13.05    1.76
   0  -7  -1   14.65    1.78
   0  -7   1   19.39    1.81
   0  -7  -1   13.72    1.75
  -1  -7  -1   10.87    1.29
   1  -7   1    9.64    1.28
   1  -7   1   10.03    1.29
   2  -7   1    8.13    1.01
   2  -7   1    6.19    1.06
  -2  -7  -1    6.83    1.04
   3  -7   1    0.74    0.37
   3  -7   1    1.06    0.35
   4  -7   1   10.62    1.35
   4  -7   1    9.14    1.25
 -12   0   2   25.36    2.74
  12   0  -2   25.76    2.75
 -10   0   2    9.80    1.04
  10   0  -2    7.40    1.00
  -9   0   2    0.71    0.20
   8   0  -2   63.86    6.19
  -8   0   2   58.82    6.19
   7   0  -2   -0.17    0.07
   7   0  -2    0.02    0.09
  -7   0   2   -0.06    0.08
  -6   0   2   40.76    4.80
   6   0  -2   53.58    4.82
   6   0  -2   49.03    4.79
   5   0  -2    0.04    0.08
   5   0  -2   -0.02    0.06
  -5   0   2    0.08    0.08
   4   0  -2    0.38    0.11
   4   0  -2    0.57    0.14
  -4   0   2    0.63    0.14
  -3   0   2   -0.04    0.05
   3   0  -2    0.02    0.02
   3   0  -2    0.03    0.06
   3   0  -2    0.00    0.05
   2   0  -2  121.28   11.77
   2   0  -2  124.05   11.75
   2   0  -2  111.42   11.77
  -1   0   2    0.03    0.02
   1   0  -2    0.00    0.02
   1   0  -2   -0.01    0.02
   0   0  -2    0.00    0.00
   0   0   2    0.00    0.01
  -1   0  -2    0.01    0.02
   1   0   2   -0.01    0.02
   2   0   2   16.93    1.69
   2   0   2   19.47    1.70
  -2   0  -2   14.40    1.69
   3   0   2   -0.02    0.04
   3   0   2   -0.06    0.05
  -3   0  -2   -0.09    0.04
   4   0   2   51.19    4.61
  -4   0  -2   47.53    4.60
   4   0   2   39.96    4.58
   5   0   2    0.00    0.07
   5   0   2    0.01    0.08
  -5   0  -2   -0.02    0.07
   6   0   2   48.54    4.61
  -6   0  -2   40.62    4.60
   6   0   2   47.67    4.58
  -7   0  -2   -0.01    0.09
   7   0   2    0.18    0.12
   7   0   2   -0.07    0.07
   8   0   2   17.35    1.75
  -8   0  -2   15.16    1.75
   9   0   2    0.66    0.21
  10   0   2   14.10    1.47
 -10   0  -2   11.70    1.47
  11   0   2    0.13    0.21
 -11   0  -2    0.03    0.18
  12   0   2    6.06    0.99
 -12   0  -2    7.26    0.90
 -12  -1   2    3.88    0.72
 -12   1   2    5.35    0.77
  12   1  -2    3.91    0.77
 -11  -1   2    3.04    0.46
  11  -1  -2    0.74    0.30
  11   1  -2    3.28    0.50
  10  -1  -2   16.73    2.00
 -10  -1   2   19.14    2.06
 -10   1   2   21.87    2.08
  10   1  -2   18.91    2.06
   9  -1  -2    3.16    0.58
  -9  -1   2    3.03    0.52
   9  -1  -2    3.29    0.49
   9   1  -2    2.83    0.52
  -9   1   2    2.90    0.51
   8  -1  -2   25.84    2.68
   8  -1  -2   28.17    2.65
  -8  -1   2   29.01    2.68
  -8   1   2   22.87    2.66
   8   1  -2   22.24    2.66
   7  -1  -2    3.20    0.53
   7  -1  -2    4.04    0.46
  -7  -1   2    3.36    0.51
  -7   1   2    3.49    0.53
   7   1  -2    3.47    0.53
  -6  -1   2    7.02    0.91
   6  -1  -2    8.94    0.84
   6  -1  -2    9.48    0.95
   6  -1  -2    7.76    0.89
   6   1  -2    7.58    0.92
   6   1  -2    8.76    0.86
  -6   1   2    7.44    0.91
   5  -1  -2   11.10    1.13
   5  -1  -2   10.83    1.09
   5  -1  -2   10.33    1.17
  -5  -1   2   10.91    1.15
  -5   1   2   12.05    1.16
   5   1  -2    8.80    1.14
   5   1  -2   11.10    1.09
  -4  -1   2   55.58    5.86
   4  -1  -2   64.33    5.85
   4  -1  -2   56.94    5.90
   4  -1  -2   60.27    5.83
   4   1  -2   55.30    5.87
  -4   1   2   54.84    5.86
   4   1  -2   62.94    5.82
   3  -1  -2   30.87    2.97
   3  -1  -2   29.49    3.03
  -3  -1   2   29.77    2.98
   3  -1  -2   26.75    2.97
  -3  -1   2   27.57    2.99
  -3   1   2   28.59    2.98
   3   1  -2   31.05    2.96
   3   1  -2   34.65    3.00
  -2  -1   2   76.40    6.84
   2  -1  -2   71.17    6.82
  -2  -1   2   60.13    6.84
   2  -1  -2   61.49    6.83
   2   1  -2   66.55    6.84
  -2   1   2   78.03    6.84
   1  -1  -2   29.91    2.59
  -1  -1   2   25.42    2.59
  -1  -1   2   25.51    2.57
  -1  -1   2   26.77    2.57
   1   1  -2   22.51    2.57
  -1   1   2   25.64    2.56
   0  -1   2   33.05    3.02
   0  -1   2   28.20    3.01
   0  -1  -2   29.40    3.01
  -1  -1  -2    5.41    0.53
   1  -1   2    4.87    0.56
  -1  -1  -2    5.86    0.55
   1  -1   2    5.39    0.58
  -1  -1  -2    5.08    0.53
  -1  -1  -2    4.87    0.56
  -1   1  -2    5.16    0.53
   1   1   2    5.40    0.54
  -1   1  -2    5.39    0.53
  -2  -1  -2  247.54   24.23
   2  -1   2  257.70   24.24
  -2  -1  -2  267.12   24.24
   2  -1   2  238.84   24.23
  -2   1  -2  219.98   24.22
   2   1   2  240.95   24.23
   3  -1   2   18.41    2.01
  -3  -1  -2   20.92    1.99
   3  -1   2   19.38    1.97
   3   1   2   16.22    1.98
  -3   1  -2   22.79    1.98
  -4  -1  -2   66.18    6.65
   4  -1   2   75.45    6.71
  -4  -1  -2   56.78    6.70
   4  -1   2   58.55    6.73
  -4   1  -2   73.41    6.71
   4   1   2   74.13    6.73
   5  -1   2    1.69    0.34
  -5  -1  -2    2.45    0.35
   5  -1   2    2.11    0.31
   5   1   2    2.35    0.35
  -5   1  -2    2.34    0.34
   6  -1   2    1.74    0.29
  -6  -1  -2    1.91    0.32
   6  -1   2    1.98    0.34
   6   1   2    1.65    0.31
  -6   1  -2    1.31    0.28
   7  -1   2    4.21    0.55
   7  -1   2    4.67    0.59
  -7  -1  -2    4.55    0.57
   7   1   2    3.87    0.63
  -7   1  -2    5.03    0.58
   8  -1   2   28.45    2.90
   8  -1   2   27.72    2.86
  -8  -1  -2   28.23    2.89
  -8   1  -2   29.30    2.90
   8   1   2   25.52    2.89
   9  -1   2    0.89    0.25
  -9  -1  -2    0.79    0.25
   9   1   2    0.53    0.24
  -9   1  -2    0.73    0.25
  10  -1   2   49.48    4.52
 -10  -1  -2   46.08    4.51
  10   1   2   43.01    4.52
 -10   1  -2   36.88    4.52
 -11  -1  -2    2.98    0.51
  11  -1   2    2.34    0.48
  11   1   2    2.99    0.54
 -11   1  -2    2.31    0.53
 -12  -1  -2    0.80    0.31
 -12   1  -2    0.58    0.34
  12   1   2    1.20    0.43
 -11  -2   2    3.49    0.56
 -11   2   2    3.09    0.57
  11   2  -2    3.08    0.58
 -10  -2   2    0.59    0.24
 -10   2   2    1.02    0.30
  10   2  -2    0.83    0.28
   9  -2  -2    0.51    0.26
  -9   2   2    1.32    0.29
   8  -2  -2   52.69    5.75
   8  -2  -2   56.68    5.65
  -8  -2   2   59.49    5.71
  -8   2   2   56.66    5.72
   7  -2  -2    2.20    0.32
  -7  -2   2    3.09    0.41
   7  -2  -2    2.56    0.47
  -7   2   2    2.72    0.41
   7   2  -2    1.51    0.37
   6  -2  -2   73.12    8.82
   6  -2  -2   88.96    8.74
   6  -2  -2   86.19    8.73
  -6  -2   2   90.81    8.78
  -6   2   2   94.22    8.80
   6   2  -2   94.93    8.81
   5  -2  -2    1.07    0.28
   5  -2  -2    1.18    0.16
   5  -2  -2    1.31    0.21
  -5  -2   2    1.37    0.23
   5   2  -2    1.30    0.25
  -5   2   2    1.25    0.23
  -4  -2   2    1.37    0.21
   4  -2  -2    1.18    0.13
   4  -2  -2    0.85    0.24
   4  -2  -2    1.00    0.19
  -4  -2   2    1.41    0.24
   4   2  -2    1.23    0.22
  -4   2   2    1.15    0.20
   3  -2  -2    0.16    0.12
  -3  -2   2    0.38    0.08
  -3  -2   2    0.17    0.10
   3  -2  -2    0.27    0.10
  -3   2   2    0.23    0.07
   3   2  -2    0.14    0.08
  -2  -2   2   37.89    3.52
  -2  -2   2   35.33    3.59
   2  -2  -2   34.33    3.58
   2  -2  -2   36.41    3.63
  -2   2   2   36.01    3.53
   2   2  -2   33.34    3.55
  -1  -2   2   22.56    2.67
   1  -2  -2   31.06    2.69
  -1  -2   2   24.84    2.67
   1  -2  -2   28.24    2.71
   1   2  -2   26.11    2.62
   0  -2   2   91.41   10.03
   0  -2  -2  112.07   10.04
   0  -2  -2  102.46   10.04
   0  -2   2   98.08   10.03
  -1  -2  -2    6.75    0.80
  -1  -2  -2    9.58    0.84
   1  -2   2    6.38    0.80
   1   2   2    7.68    0.75
  -2  -2  -2    4.50    0.46
  -2  -2  -2    4.26    0.52
  -2  -2  -2    4.21    0.49
   2  -2   2    4.23    0.55
   2  -2   2    5.68    0.54
   2   2   2    5.02    0.49
  -2   2  -2    4.43    0.46
  -3  -2  -2    2.90    0.38
  -3  -2  -2    3.70    0.37
   3  -2   2    3.31    0.42
   3  -2   2    3.52    0.46
  -3   2  -2    3.48    0.38
   3   2   2    4.36    0.42
   4  -2   2   25.57    2.65
   4  -2   2   25.35    2.70
   4  -2   2   24.69    2.76
  -4  -2  -2   26.10    2.69
  -4   2  -2   27.85    2.69
   4   2   2   30.76    2.72
   5  -2   2    0.35    0.08
   5  -2   2    0.43    0.18
   5  -2   2    0.21    0.10
  -5  -2  -2    0.21    0.11
  -5   2  -2    0.20    0.11
   5   2   2    0.18    0.11
   6  -2   2   97.50    9.53
   6  -2   2   94.16    9.44
  -6  -2  -2  101.67    9.46
   6  -2   2   84.08    9.41
   6   2   2   97.73    9.49
  -6   2  -2   95.75    9.47
   7  -2   2    1.10    0.20
  -7  -2  -2    0.90    0.23
   7  -2   2    0.92    0.29
  -7   2  -2    1.53    0.29
   7   2   2    0.86    0.25
   8  -2   2    4.79    0.57
  -8  -2  -2    5.25    0.63
   8  -2   2    4.84    0.74
   8   2   2    4.80    0.72
  -8   2  -2    4.76    0.64
   9  -2   2    2.30    0.50
  -9   2  -2    2.90    0.50
 -10  -2  -2   20.50    2.34
 -10   2  -2   25.32    2.39
  10   2   2   20.17    2.37
 -11  -2  -2    0.93    0.28
 -11   2  -2    1.06    0.32
  11   2   2    0.45    0.29
 -11   3   2    2.98    0.62
  11   3  -2    5.13    0.76
  10  -3  -2   22.20    2.35
 -10   3   2   20.45    2.28
  10   3  -2   20.21    2.32
  -9  -3   2    0.19    0.16
   9  -3  -2    0.16    0.21
   9   3  -2    0.24    0.19
  -9   3   2    0.19    0.19
   8  -3  -2   10.95    1.38
  -8  -3   2   10.97    1.25
   8   3  -2   10.93    1.31
  -8   3   2   13.68    1.32
   7  -3  -2    6.74    0.92
  -7  -3   2    8.58    0.82
   7   3  -2    6.54    0.85
  -7   3   2    6.53    0.83
   6  -3  -2    5.85    0.69
  -6  -3   2    5.89    0.67
   6  -3  -2    7.33    0.84
  -6   3   2    5.87    0.70
   6   3  -2    5.81    0.72
   5  -3  -2    0.33    0.14
  -5  -3   2    0.22    0.14
   5  -3  -2    0.44    0.21
  -5  -3   2    0.45    0.11
   5   3  -2    0.22    0.12
  -5   3   2    0.38    0.13
  -4  -3   2   68.27    5.87
  -4  -3   2   59.65    5.75
   4  -3  -2   61.72    5.91
   4  -3  -2   52.82    5.82
   4   3  -2   51.45    5.80
  -4   3   2   56.01    5.77
  -3  -3   2   22.20    2.18
   3  -3  -2   20.54    2.21
   3  -3  -2   18.69    2.15
   3   3  -2   21.59    2.11
  -2  -3   2   42.16    3.63
   2  -3  -2   29.55    3.58
  -2  -3   2   39.49    3.58
   2  -3  -2   32.01    3.63
   2   3  -2   34.49    3.53
  -1  -3   2   30.28    2.80
   1  -3  -2   30.60    2.79
   1  -3  -2   23.99    2.79
  -1  -3   2   24.18    2.76
   0  -3   2   11.52    1.18
   0  -3  -2   10.40    1.17
   0  -3  -2   10.44    1.17
  -1  -3  -2   10.16    1.22
  -1  -3  -2   13.71    1.23
   1  -3   2    9.43    1.21
   1  -3   2   12.10    1.25
   2  -3   2   86.66    9.65
  -2  -3  -2  111.61    9.64
   2  -3   2   98.05    9.70
  -2  -3  -2   96.34    9.66
   2   3   2   91.34    9.58
  -3  -3  -2   15.50    1.69
  -3  -3  -2   16.20    1.75
   3  -3   2   15.75    1.74
  -3   3  -2   16.71    1.66
   3   3   2   18.70    1.71
  -4  -3  -2   43.32    4.30
   4  -3   2   50.88    4.41
   4  -3   2   39.90    4.45
   4   3   2   39.69    4.36
   5  -3   2   -0.09    0.11
  -5  -3  -2    0.28    0.09
   5  -3   2    0.02    0.10
   5   3   2    0.28    0.12
  -5   3  -2    0.04    0.07
   6  -3   2    0.28    0.19
   6  -3   2    0.34    0.14
  -6  -3  -2    0.36    0.12
   6   3   2    0.10    0.12
  -6   3  -2    0.31    0.14
  -7  -3  -2    0.07    0.10
   7  -3   2   -0.09    0.15
  -7   3  -2    0.13    0.12
   7   3   2    0.00    0.13
  -8  -3  -2   38.59    4.07
   8  -3   2   41.11    4.20
  -8   3  -2   38.42    4.10
   8   3   2   42.80    4.14
   9  -3   2    1.42    0.42
  -9  -3  -2    1.13    0.28
  -9   3  -2    1.06    0.31
   9   3   2    1.61    0.37
  10  -3   2   20.82    2.45
  10   3   2   26.46    2.46
 -10   3  -2   20.42    2.41
  11   3   2    0.38    0.25
 -11   3  -2    0.29    0.24
  10  -4  -2    2.82    0.63
  10   4  -2    3.06    0.61
 -10   4   2    3.03    0.67
   9  -4  -2    0.08    0.19
   9   4  -2    1.29    0.37
   8  -4  -2   20.38    2.26
   8   4  -2   19.35    2.14
   7  -4  -2   12.47    1.44
   7   4  -2   10.96    1.30
   6  -4  -2   25.07    2.85
   6   4  -2   27.35    2.74
   5  -4  -2    9.03    1.04
  -5  -4   2   10.29    1.08
   5  -4  -2    7.79    1.11
   5   4  -2    9.34    1.03
  -4  -4   2   -0.12    0.10
   4  -4  -2   -0.04    0.09
   4  -4  -2   -0.12    0.14
   4   4  -2    0.03    0.07
  -3  -4   2    3.27    0.51
   3  -4  -2    3.01    0.56
   3  -4  -2    2.97    0.49
   3   4  -2    3.26    0.39
  -2  -4   2   12.85    1.39
   2  -4  -2   14.64    1.40
  -2  -4   2   11.21    1.33
   2   4  -2   12.12    1.27
  -1  -4   2   39.73    3.91
  -1  -4   2   36.34    3.92
   1  -4  -2   38.41    3.92
   0  -4   2   45.47    4.62
   0  -4  -2   45.17    4.61
   0  -4  -2   43.65    4.60
   0  -4   2   46.26    4.61
  -1  -4  -2   15.29    1.75
  -1  -4  -2   14.25    1.75
   1  -4   2   18.50    1.80
   1  -4   2   18.24    1.79
   2  -4   2   17.36    1.54
  -2  -4  -2   11.77    1.41
   2  -4   2   12.21    1.45
  -2  -4  -2   13.97    1.46
   2   4   2   12.78    1.34
   3  -4   2    7.16    0.96
  -3  -4  -2    7.56    0.88
  -3  -4  -2    9.31    0.95
   3  -4   2    7.93    0.92
   3   4   2    7.51    0.84
   4  -4   2   39.72    3.75
  -4  -4  -2   31.48    3.65
   4  -4   2   32.33    3.65
   4   4   2   39.07    3.61
   5  -4   2    3.90    0.59
   5  -4   2    3.88    0.68
   5   4   2    3.97    0.51
   6  -4   2   48.74    4.27
   6  -4   2   41.62    4.12
   6   4   2   33.10    4.09
   7  -4   2    0.90    0.35
   7   4   2    1.18    0.31
   8  -4   2    5.58    0.96
   8   4   2    6.71    0.82
   9   4   2    2.95    0.54
  10  -4   2    1.25    0.42
 -10   4  -2    1.49    0.46
  10   4   2    1.66    0.47
   9  -5  -2    0.17    0.30
   9   5  -2    0.71    0.27
   8  -5  -2    1.79    0.51
   8   5  -2    1.84    0.43
   7  -5  -2    0.66    0.29
   7   5  -2    0.43    0.22
   6  -5  -2    1.06    0.40
   5  -5  -2    7.37    1.13
   5  -5  -2    8.82    0.93
  -5  -5   2    6.05    0.89
   4  -5  -2   24.69    2.65
   4  -5  -2   25.67    2.75
  -4  -5   2   24.60    2.66
   3  -5  -2   22.75    2.21
   3  -5  -2   23.02    2.29
  -3  -5   2   16.21    2.17
  -2  -5   2   30.72    3.67
  -2  -5   2   39.23    3.76
   2  -5  -2   41.67    3.82
   2  -5  -2   34.50    3.72
  -1  -5   2   19.76    1.92
   1  -5  -2   16.18    1.89
   1  -5  -2   15.02    1.85
  -1  -5   2   17.86    1.87
   0  -5  -2    0.10    0.15
   0  -5   2    0.53    0.22
   0  -5   2    0.31    0.20
   0  -5  -2    0.21    0.17
   1  -5   2   25.25    2.56
  -1  -5  -2   26.72    2.55
  -1  -5  -2   22.33    2.54
   1  -5   2   21.26    2.55
  -2  -5  -2   19.28    2.28
   2  -5   2   19.92    2.30
  -2  -5  -2   24.74    2.29
   2  -5   2   21.17    2.34
   3  -5   2   18.00    2.13
  -3  -5  -2   20.58    2.13
   3  -5   2   20.33    2.19
   4  -5   2    6.96    0.79
   4  -5   2    6.25    0.83
  -4  -5  -2    3.97    0.75
   5  -5   2    0.45    0.23
   5  -5   2   -0.03    0.15
   6  -5   2    1.82    0.40
   6  -5   2    1.18    0.41
   7  -5   2    4.80    0.86
   7   5   2    4.52    0.71
   8  -5   2    5.75    1.01
   8   5   2    6.84    0.88
   9  -5   2    7.93    1.23
   9   5   2    8.14    1.19
   7  -6  -2   19.35    2.30
   6  -6  -2    8.61    1.32
   5  -6  -2    3.21    0.57
   5  -6  -2    1.90    0.56
  -5  -6   2    2.81    0.55
  -4  -6   2    3.82    0.70
   4  -6  -2    4.81    0.87
   4  -6  -2    5.44    0.78
   3  -6  -2    1.95    0.50
   3  -6  -2    1.07    0.34
  -2  -6   2    5.57    0.91
   2  -6  -2    5.87    0.91
   2  -6  -2    7.14    0.91
   1  -6  -2   11.23    1.28
  -1  -6   2    8.44    1.20
   1  -6  -2   12.08    1.31
  -1  -6   2   11.17    1.28
   0  -6  -2   14.33    1.58
   0  -6   2   15.67    1.62
   0  -6  -2   13.62    1.58
   0  -6   2   11.60    1.54
  -1  -6  -2   13.10    1.62
  -1  -6  -2   13.72    1.62
   1  -6   2   17.82    1.71
   1  -6   2   13.40    1.64
  -2  -6  -2    0.62    0.27
   2  -6   2    1.23    0.35
   2  -6   2    0.84    0.34
  -3  -6  -2    7.53    0.99
   3  -6   2    6.73    1.01
   3  -6   2    9.00    1.03
   4  -6   2    3.35    0.70
   4  -6   2    4.05    0.68
   5  -6   2   26.77    2.71
   5  -6   2   22.75    2.77
   6  -6   2   15.06    1.83
   7  -6   2    5.93    1.04
   4  -7  -2    7.47    1.06
   4  -7  -2    8.87    1.32
  -4  -7   2    8.93    1.12
   3  -7  -2   18.26    2.11
   3  -7  -2   18.87    2.03
  -3  -7   2   16.08    2.01
   2  -7  -2    4.35    0.74
  -2  -7   2    4.99    0.79
   2  -7  -2    2.96    0.68
   1  -7  -2    3.42    0.66
  -1  -7   2    4.48    0.75
   1  -7  -2    2.66    0.62
   0  -7  -2    0.94    0.37
   0  -7  -2    0.98    0.36
   0  -7   2    0.86    0.36
  -1  -7  -2   10.29    1.27
   1  -7   2   10.00    1.28
   2  -7   2    5.81    0.95
  -2  -7  -2    5.58    0.92
   2  -7   2    6.35    0.96
  -3  -7  -2   10.66    1.37
   3  -7   2   11.93    1.41
   3  -7   2   11.30    1.46
   4  -7   2    2.39    0.58
   4  -7   2    2.48    0.56
  11   0  -3   25.61    3.02
 -11   0   3   32.67    3.07
  10   0  -3    0.14    0.16
 -10   0   3    1.86    0.32
   9   0  -3   22.67    2.28
  -9   0   3   20.12    2.26
  -8   0   3    0.40    0.17
   8   0  -3    0.09    0.14
   7   0  -3   -0.04    0.10
  -7   0   3    0.07    0.11
   7   0  -3   -0.06    0.08
   6   0  -3    0.04    0.08
   6   0  -3    0.05    0.08
  -6   0   3    0.05    0.09
   5   0  -3   20.58    2.03
  -5   0   3   17.85    2.09
   5   0  -3   19.00    2.09
   5   0  -3   24.89    2.12
   4   0  -3   -0.04    0.04
  -4   0   3    0.00    0.06
   4   0  -3    0.02    0.02
   4   0  -3    0.10    0.07
  -3   0   3  208.05   23.19
   3   0  -3  270.42   23.20
   3   0  -3  241.67   23.19
   3   0  -3  219.02   23.16
   2   0  -3   -0.03    0.03
  -2   0   3   -0.02    0.04
   2   0  -3    0.05    0.04
  -1   0   3   18.61    1.83
   1   0  -3   18.08    1.83
   0   0  -3    0.03    0.01
   0   0  -3    0.02    0.02
   0   0   3    0.02    0.02
   0   0   3    0.04    0.02
   1   0   3   66.02    6.53
  -2   0  -3    0.03    0.04
   2   0   3    0.04    0.04
  -3   0  -3   50.95    5.00
   3   0   3   49.38    4.98
   4   0   3   -0.01    0.04
   4   0   3    0.03    0.07
  -4   0  -3    0.02    0.06
   5   0   3    8.96    1.16
  -5   0  -3   12.49    1.19
   5   0   3   11.71    1.15
   6   0   3    0.09    0.10
  -6   0  -3    0.14    0.10
   6   0   3    0.01    0.07
  -7   0  -3  109.77    9.71
   7   0   3   84.96    9.68
   8   0   3   -0.07    0.12
  -8   0  -3   -0.06    0.12
  -9   0  -3   40.04    3.95
   9   0   3   36.52    3.93
 -10   0  -3    0.07    0.15
  11   0   3    2.61    0.56
 -11   0  -3    2.06    0.48
  12   0   3    3.52    0.60
 -12   0  -3    1.72    0.45
 -12  -1   3    0.34    0.23
  12   1  -3    0.22    0.27
 -12   1   3    0.99    0.36
 -11  -1   3    5.74    0.75
  11  -1  -3    4.88    0.70
  11   1  -3    6.42    0.77
 -11   1   3    5.58    0.84
 -10  -1   3    2.27    0.46
  10  -1  -3    3.19    0.47
 -10   1   3    2.33    0.47
   9  -1  -3    3.67    0.62
   9  -1  -3    3.06    0.50
  -9  -1   3    3.17    0.52
   9   1  -3    2.71    0.52
  -9   1   3    3.44    0.55
   8  -1  -3   -0.18    0.11
   8  -1  -3    0.06    0.10
  -8  -1   3    0.05    0.11
   8   1  -3    0.20    0.14
  -8   1   3    0.08    0.12
  -7  -1   3   59.74    6.10
   7  -1  -3   62.18    6.13
   7  -1  -3   59.00    6.08
  -7   1   3   61.87    6.12
   6  -1  -3    2.90    0.45
   6  -1  -3    2.74    0.31
   6  -1  -3    2.36    0.35
  -6  -1   3    3.28    0.39
   6   1  -3    2.96    0.33
   6   1  -3    3.02    0.45
  -6   1   3    3.49    0.41
   5  -1  -3   46.75    4.85
   5  -1  -3   46.05    4.79
   5  -1  -3   47.63    4.75
   5   1  -3   56.88    4.84
  -5   1   3   45.50    4.81
   5   1  -3   46.14    4.77
   4  -1  -3    7.67    0.78
   4  -1  -3    8.90    0.81
   4  -1  -3    9.27    0.88
  -4  -1   3    6.82    0.82
   4   1  -3    6.68    0.82
  -4   1   3    8.74    0.83
   4   1  -3    6.76    0.78
  -3  -1   3    7.10    0.85
  -3  -1   3    7.92    0.85
   3  -1  -3    8.91    0.84
   3  -1  -3    8.13    0.83
   3  -1  -3   10.48    0.91
   3   1  -3    7.51    0.86
  -3   1   3    7.73    0.85
   2  -1  -3   12.93    1.36
   2  -1  -3   14.23    1.35
  -2  -1   3   12.48    1.37
  -2   1   3   15.78    1.37
   2   1  -3   11.82    1.37
  -1  -1   3  173.27   18.94
  -1  -1   3  194.66   18.92
   1  -1  -3  188.82   18.96
  -1  -1   3  181.18   18.93
   1   1  -3  214.31   18.92
  -1   1   3  196.98   18.94
   0  -1   3   62.26    6.66
   0  -1  -3   75.70    6.66
   0   1  -3   65.81    6.63
   0   1  -3   65.07    6.63
   1  -1   3   42.46    4.26
  -1  -1  -3   46.83    4.23
  -1  -1  -3   41.48    4.22
  -1  -1  -3   42.65    4.22
  -1   1  -3   43.26    4.22
   1   1   3   39.07    4.22
  -2  -1  -3  205.54   21.14
  -2  -1  -3  237.90   21.15
   2  -1   3  224.26   21.14
   2  -1   3  206.15   21.18
  -2   1  -3  183.82   21.13
   2   1   3  226.84   21.15
   3  -1   3    2.73    0.29
   3  -1   3    2.98    0.34
  -3  -1  -3    2.65    0.26
  -3  -1  -3    2.17    0.29
   3   1   3    2.13    0.30
  -3   1  -3    2.06    0.28
   4  -1   3    2.25    0.31
   4  -1   3    2.51    0.35
  -4  -1  -3    2.33    0.33
  -4  -1  -3    2.94    0.28
   4   1   3    2.50    0.34
  -4   1  -3    2.48    0.32
  -5  -1  -3  136.26   15.08
   5  -1   3  140.42   15.10
   5  -1   3  145.01   15.07
  -5   1  -3  173.61   15.09
   5   1   3  165.60   15.10
   6  -1   3    1.79    0.35
   6  -1   3    2.08    0.33
  -6  -1  -3    2.19    0.37
  -6   1  -3    2.34    0.36
   6   1   3    2.06    0.36
  -7  -1  -3   63.51    5.56
   7  -1   3   52.57    5.51
   7  -1   3   53.95    5.54
  -7   1  -3   56.20    5.54
   7   1   3   48.59    5.53
  -8  -1  -3    6.10    0.73
   8  -1   3    5.58    0.69
   8  -1   3    5.37    0.72
   8   1   3    5.41    0.72
  -8   1  -3    6.70    0.74
   9  -1   3    6.36    0.82
  -9  -1  -3    7.73    0.86
   9   1   3    6.63    0.85
  -9   1  -3    7.02    0.86
 -10   1  -3    0.50    0.23
  11  -1   3   21.25    2.34
 -11  -1  -3   20.49    2.36
 -11   1  -3   24.49    2.40
  11   1   3   21.49    2.40
 -12  -1  -3    0.47    0.26
 -12   1  -3    0.92    0.36
  12   1   3    0.80    0.35
 -11  -2   3   22.13    2.36
  11   2  -3   21.43    2.39
 -11   2   3   21.67    2.37
 -10  -2   3   -0.28    0.10
 -10   2   3    0.13    0.18
  10   2  -3   -0.14    0.12
   9  -2  -3   23.07    2.45
  -9  -2   3   23.89    2.39
   9   2  -3   22.75    2.41
  -9   2   3   20.61    2.39
   8  -2  -3    2.73    0.51
   8  -2  -3    2.56    0.35
  -8   2   3    3.36    0.51
   8   2  -3    3.32    0.51
  -7  -2   3    0.08    0.11
   7  -2  -3   -0.11    0.16
   7  -2  -3    0.03    0.07
   7   2  -3    0.17    0.13
  -7   2   3    0.18    0.13
   6  -2  -3    0.46    0.21
   6  -2  -3    0.38    0.11
   6  -2  -3    0.51    0.11
  -6  -2   3    0.67    0.18
   6   2  -3    0.42    0.17
  -6   2   3    0.46    0.16
  -5  -2   3    5.33    0.64
  -5  -2   3    5.92    0.64
   5  -2  -3    5.52    0.59
   5  -2  -3    4.65    0.69
   5  -2  -3    6.52    0.63
  -5   2   3    6.58    0.65
   5   2  -3    4.67    0.64
   4  -2  -3    6.53    0.61
   4  -2  -3    5.15    0.67
  -4  -2   3    6.39    0.61
  -4  -2   3    4.82    0.62
   4  -2  -3    5.25    0.56
  -4   2   3    5.61    0.60
   4   2  -3    4.65    0.61
  -3  -2   3   77.45    6.81
   3  -2  -3   65.92    6.89
  -3  -2   3   63.54    6.85
   3  -2  -3   64.45    6.83
  -3   2   3   69.79    6.81
   3   2  -3   69.22    6.83
  -2  -2   3    4.18    0.42
   2  -2  -3    4.24    0.52
  -2  -2   3    4.41    0.43
   2  -2  -3    3.59    0.47
  -2  -2   3    5.50    0.52
  -2   2   3    3.96    0.43
   2   2  -3    3.95    0.45
  -1  -2   3   34.80    3.65
  -1  -2   3   42.73    3.69
   1  -2  -3   33.81    3.69
   1  -2  -3   33.65    3.66
   1   2  -3   37.57    3.62
   0  -2  -3   10.95    1.28
   0  -2   3   12.80    1.29
   0  -2  -3   13.22    1.29
   1  -2   3   69.86    7.41
   1  -2   3   80.16    7.44
  -1  -2  -3   68.63    7.41
  -1  -2  -3   71.60    7.40
   1   2   3   81.16    7.36
  -2  -2  -3    2.25    0.25
   2  -2   3    2.27    0.31
  -2  -2  -3    2.64    0.29
  -2  -2  -3    2.16    0.30
   2  -2   3    2.25    0.38
  -2  -2  -3    2.46    0.25
   2   2   3    2.77    0.28
  -2   2  -3    2.31    0.25
  -3  -2  -3  153.55   15.31
   3  -2   3  146.82   15.39
  -3  -2  -3  152.09   15.29
   3  -2   3  143.65   15.34
  -3   2  -3  176.74   15.31
  -4  -2  -3    3.36    0.37
   4  -2   3    3.22    0.39
   4  -2   3    3.03    0.33
   4  -2   3    3.57    0.51
  -4   2  -3    2.75    0.36
   4   2   3    3.14    0.39
   5  -2   3    2.64    0.33
   5  -2   3    2.83    0.45
   5  -2   3    2.33    0.28
  -5  -2  -3    2.06    0.34
   5   2   3    2.34    0.38
  -5   2  -3    2.49    0.32
   6  -2   3    0.97    0.18
   6  -2   3    1.03    0.28
  -6  -2  -3    0.96    0.21
   6  -2   3    0.99    0.20
   6   2   3    1.18    0.26
  -6   2  -3    0.93    0.21
   7  -2   3   65.32    5.92
   7  -2   3   58.54    5.80
  -7  -2  -3   60.80    5.84
   7   2   3   55.76    5.86
  -7   2  -3   50.23    5.83
  -8  -2  -3    1.82    0.34
   8  -2   3    2.03    0.41
   8  -2   3    1.54    0.29
  -8   2  -3    1.93    0.40
   8   2   3    1.95    0.40
   9  -2   3   17.28    1.76
  -9  -2  -3   15.21    1.69
  -9   2  -3   13.16    1.70
   9   2   3   17.14    1.74
 -10  -2  -3    0.70    0.26
 -10   2  -3    2.16    0.37
  10   2   3    0.72    0.28
 -11  -2  -3    1.27    0.37
 -11   2  -3    1.39    0.41
  11   2   3    1.37    0.38
  11   3  -3    4.19    0.72
 -11   3   3    4.46    0.73
 -10  -3   3    3.16    0.60
  -9  -3   3    1.37    0.30
   9  -3  -3    1.49    0.41
   9   3  -3    1.38    0.36
  -9   3   3    1.14    0.32
  -8  -3   3   10.11    1.05
   8  -3  -3    8.52    1.14
  -8   3   3    9.33    1.07
   8   3  -3    8.82    1.08
   7  -3  -3   51.75    5.60
  -7  -3   3   55.39    5.47
  -7   3   3   55.88    5.51
   6  -3  -3   18.44    2.06
   6  -3  -3   18.89    1.95
  -6  -3   3   19.32    1.93
   6   3  -3   15.48    1.96
  -6   3   3   21.70    1.97
  -5  -3   3   51.60    4.40
   5  -3  -3   41.46    4.35
   5  -3  -3   38.34    4.43
  -5  -3   3   43.63    4.31
   5   3  -3   40.40    4.36
  -5   3   3   43.61    4.34
  -4  -3   3    0.58    0.10
  -4  -3   3    0.73    0.20
   4  -3  -3    0.59    0.22
   4  -3  -3    0.42    0.16
  -4   3   3    0.59    0.13
   4   3  -3    0.66    0.17
  -3  -3   3   34.28    2.92
   3  -3  -3   24.77    2.86
   3  -3  -3   25.15    2.92
  -3   3   3   27.16    2.80
   3   3  -3   29.89    2.84
   2  -3  -3   25.27    2.95
  -2  -3   3   32.00    2.95
   2   3  -3   28.47    2.85
  -1  -3   3  104.06    9.48
   1  -3  -3   82.67    9.45
  -1  -3   3   92.87    9.45
   1   3  -3   99.36    9.36
   0  -3  -3   14.32    1.38
   0  -3   3   13.79    1.39
   0  -3  -3   11.68    1.37
   0  -3   3   11.50    1.36
  -1  -3  -3    6.23    0.74
   1  -3   3    6.90    0.77
  -1  -3  -3    5.94    0.73
   1  -3   3    5.58    0.73
   1   3   3    6.64    0.64
   2  -3   3    6.26    0.84
  -2  -3  -3    7.44    0.80
  -2  -3  -3    7.68    0.83
   2  -3   3    6.64    0.82
   2   3   3    7.59    0.75
  -3  -3  -3    0.97    0.19
   3  -3   3    1.33    0.26
  -3  -3  -3    1.50    0.27
   3  -3   3    1.03    0.27
   3   3   3    1.23    0.20
  -3   3  -3    0.94    0.13
  -4  -3  -3    0.69    0.11
   4  -3   3    0.58    0.23
   4  -3   3    0.50    0.17
  -4   3  -3    0.74    0.14
   4   3   3    0.82    0.18
   5  -3   3   57.10    5.85
  -5  -3  -3   59.05    5.71
   5  -3   3   55.82    5.77
   5   3   3   51.56    5.75
  -5   3  -3   62.46    5.74
  -6  -3  -3   10.47    1.16
   6  -3   3    9.65    1.27
   6  -3   3   12.10    1.21
  -6   3  -3   11.47    1.19
   6   3   3   10.81    1.22
  -7  -3  -3   22.12    2.18
   7  -3   3   19.15    2.28
  -7   3  -3   21.11    2.20
   7   3   3   21.07    2.24
   8  -3   3    0.71    0.30
  -8  -3  -3    1.95    0.28
   8   3   3    0.94    0.27
  -8   3  -3    0.66    0.24
  -9  -3  -3    2.37    0.42
   9  -3   3    1.94    0.52
  -9   3  -3    2.47    0.49
   9   3   3    3.26    0.55
  10  -3   3    2.64    0.56
  10   3   3    3.74    0.61
 -10   3  -3    2.81    0.57
 -11   3  -3   12.96    1.57
  11   3   3   13.22    1.57
  10  -4  -3    9.13    1.21
 -10   4   3    8.53    1.48
  10   4  -3    9.07    1.17
   9  -4  -3   10.60    1.30
   9   4  -3    9.50    1.19
   8  -4  -3    4.75    0.80
   8   4  -3    3.14    0.58
   7  -4  -3    0.07    0.20
   7   4  -3    0.08    0.13
   6  -4  -3    5.57    0.92
  -6  -4   3    7.12    0.77
   6   4  -3    5.25    0.72
   5  -4  -3    9.95    1.16
   5  -4  -3    9.03    1.23
  -5  -4   3   12.16    1.20
   5   4  -3   10.17    1.13
  -4  -4   3   35.34    3.61
   4  -4  -3   34.07    3.58
   4  -4  -3   38.61    3.69
   4   4  -3   32.65    3.53
   3  -4  -3   54.54    6.06
  -3  -4   3   72.54    6.12
   3   4  -3   55.48    5.99
  -2  -4   3    2.38    0.43
   2  -4  -3    2.43    0.47
  -2  -4   3    3.12    0.37
   2  -4  -3    2.87    0.45
   2   4  -3    2.38    0.30
  -1  -4   3    2.29    0.40
   1  -4  -3    1.74    0.38
   1  -4  -3    1.95    0.36
  -1  -4   3    2.02    0.36
   0  -4  -3    7.39    0.89
   0  -4  -3    8.78    0.91
   0  -4   3    6.92    0.89
   0  -4   3    7.17    0.89
   1  -4   3   66.51    7.08
  -1  -4  -3   74.29    7.08
  -1  -4  -3   69.64    7.05
   2  -4   3   21.05    2.34
  -2  -4  -3   25.33    2.33
   2  -4   3   19.87    2.37
  -2  -4  -3   20.89    2.34
   2   4   3   23.18    2.24
  -3  -4  -3   49.66    5.42
  -3  -4  -3   49.39    5.36
   3  -4   3   51.85    5.42
   3   4   3   62.18    5.36
   4  -4   3   12.18    1.41
   4  -4   3   11.42    1.34
   4   4   3   12.49    1.29
   5  -4   3    9.83    1.06
   5  -4   3    9.69    1.15
   5   4   3    8.25    1.01
   6  -4   3    0.94    0.26
   6  -4   3    0.89    0.32
   6   4   3    1.05    0.26
   7  -4   3   11.04    1.39
   7   4   3   11.77    1.31
   8  -4   3    2.22    0.55
   8   4   3    2.45    0.48
   9  -4   3   14.67    1.73
  -9   4  -3   14.74    1.74
   9   4   3   14.12    1.69
  10  -4   3    2.89    0.62
 -10   4  -3    3.36    0.62
  10   4   3    3.32    0.62
   9  -5  -3    2.24    0.57
   9   5  -3    1.48    0.39
   8  -5  -3    3.56    0.75
   8   5  -3    3.37    0.62
   7  -5  -3   21.57    2.29
   7   5  -3   18.12    2.08
  -6  -5   3   12.91    1.46
   6  -5  -3   12.41    1.57
  -5  -5   3   13.32    1.29
   5  -5  -3    9.16    1.20
   5  -5  -3    9.97    1.33
  -4  -5   3   -0.01    0.13
   4  -5  -3    0.22    0.21
   4  -5  -3    0.27    0.17
   3  -5  -3    3.16    0.60
   3  -5  -3    2.98    0.50
  -3  -5   3    2.33    0.49
   2  -5  -3   68.45    6.60
  -2  -5   3   55.03    6.52
   2  -5  -3   70.04    6.54
  -1  -5   3   11.72    1.32
   1  -5  -3   10.40    1.32
   1  -5  -3   10.73    1.36
  -1  -5   3   14.66    1.40
   0  -5   3    7.74    0.93
   0  -5  -3    7.08    0.91
  -1  -5  -3   22.32    2.38
   1  -5   3   24.33    2.43
   1  -5   3   23.34    2.42
  -1  -5  -3   19.73    2.37
  -2  -5  -3   -0.32    0.11
   2  -5   3    0.12    0.18
  -2  -5  -3    0.03    0.11
   2  -5   3    0.14    0.19
   3  -5   3    4.35    0.77
  -3  -5  -3    4.69    0.72
   3  -5   3    5.59    0.79
   4  -5   3    0.35    0.22
   4  -5   3    0.12    0.19
   5  -5   3   36.20    3.37
   5  -5   3   27.48    3.39
   6  -5   3   11.87    1.49
   6  -5   3   14.85    1.63
   7  -5   3   11.13    1.42
   7   5   3   11.04    1.29
   8  -5   3    3.78    0.75
   8   5   3    3.25    0.64
   9  -5   3    2.20    0.59
   9   5   3    2.96    0.57
   6  -6  -3    0.17    0.27
  -5  -6   3    9.12    1.06
   5  -6  -3    9.36    1.17
   5  -6  -3    6.37    0.98
  -4  -6   3    7.45    1.04
   4  -6  -3    8.78    1.14
   4  -6  -3    8.54    1.04
   3  -6  -3   19.13    2.05
   3  -6  -3   16.91    2.10
  -3  -6   3   19.00    2.07
   2  -6  -3    7.87    1.04
  -2  -6   3    8.93    1.08
   2  -6  -3    8.14    1.09
   1  -6  -3    0.19    0.23
  -1  -6   3    0.12    0.18
   1  -6  -3   -0.04    0.15
  -1  -6   3   -0.03    0.18
   0  -6   3    8.62    1.19
   0  -6   3   11.59    1.29
   0  -6  -3   10.45    1.24
   0  -6  -3   10.88    1.24
  -1  -6  -3   12.45    1.24
   1  -6   3    9.72    1.21
   1  -6   3    8.81    1.20
  -1  -6  -3    8.91    1.18
  -2  -6  -3   13.70    1.76
   2  -6   3   17.13    1.86
   2  -6   3   17.24    1.83
   3  -6   3   11.88    1.55
  -3  -6  -3   14.70    1.58
   3  -6   3   14.07    1.64
   4  -6   3    4.50    0.78
   4  -6   3    5.41    0.91
   5  -6   3    0.77    0.34
   5  -6   3    0.27    0.24
   6  -6   3    0.45    0.32
   7  -6   3    7.86    1.27
   4  -7  -3    1.04    0.42
   4  -7  -3    1.22    0.39
  -4  -7   3    1.23    0.37
   3  -7  -3    3.45    0.65
  -3  -7   3    3.78    0.69
   3  -7  -3    3.12    0.69
  -2  -7   3   20.43    2.20
   2  -7  -3   17.40    2.14
   2  -7  -3   20.04    2.24
   1  -7  -3    3.49    0.71
   1  -7  -3    4.50    0.74
  -1  -7   3    3.61    0.71
   0  -7   3    5.92    0.89
   0  -7  -3    7.12    1.07
   0  -7  -3    7.51    0.96
   0  -7   3    8.10    1.01
   1  -7   3    2.71    0.62
  -1  -7  -3    5.06    0.77
   1  -7   3    4.15    0.72
   2  -7   3    0.54    0.27
   2  -7   3    0.13    0.21
  -2  -7  -3    0.25    0.23
   3  -7   3    4.67    0.82
   3  -7   3    3.63    0.74
   4  -7   3    2.97    0.63
   4  -7   3    3.24    0.68
 -12   0   4    7.40    0.99
  12   0  -4    8.43    0.98
 -10   0   4    1.93    0.42
  10   0  -4    2.27    0.43
   9   0  -4    0.30    0.17
  -8   0   4    5.44    0.74
   8   0  -4    7.49    0.80
   8   0  -4    5.90    0.75
   7   0  -4   -0.04    0.08
  -7   0   4   -0.02    0.08
   7   0  -4   -0.01    0.07
   6   0  -4  181.54   17.38
   6   0  -4  154.34   17.37
  -6   0   4  190.25   17.40
   5   0  -4    0.03    0.07
   5   0  -4    0.00    0.05
  -5   0   4    0.07    0.08
  -4   0   4    1.00    0.20
   4   0  -4    1.03    0.18
   4   0  -4    1.09    0.19
  -3   0   4   -0.05    0.05
   3   0  -4   -0.02    0.05
   3   0  -4   -0.02    0.04
   2   0  -4  281.92   28.66
  -2   0   4  305.65   28.67
  -2   0   4  283.15   28.68
   1   0  -4    0.01    0.02
  -1   0   4    0.01    0.03
   0   0   4   26.64    2.34
   0   0  -4   20.66    2.34
  -1   0  -4    0.00    0.02
   1   0   4   -0.01    0.03
   2   0   4  101.75   10.69
  -2   0  -4  114.23   10.69
  -3   0  -4   -0.03    0.04
   3   0   4   -0.03    0.05
  -4   0  -4  115.51   10.79
   4   0   4  101.69   10.78
  -5   0  -4   -0.05    0.07
   5   0   4   -0.09    0.06
   6   0   4   98.51    8.80
  -6   0  -4   77.94    8.78
   7   0   4    0.19    0.12
  -7   0  -4    0.26    0.13
   8   0   4    0.90    0.28
  -8   0  -4    1.53    0.32
   9   0   4    0.20    0.15
  10   0   4    6.82    0.87
 -10   0  -4    6.54    0.96
  11   0   4    0.21    0.24
 -11   0  -4   -0.16    0.16
  12   0   4   28.22    3.00
 -12   0  -4   27.30    3.02
 -12  -1   4    0.26    0.24
  12   1  -4    0.48    0.28
 -12   1   4    0.55    0.27
  11  -1  -4    0.42    0.19
 -11  -1   4    0.61    0.24
  11   1  -4    1.79    0.36
 -11   1   4    0.14    0.18
  10  -1  -4   22.65    2.33
 -10  -1   4   21.10    2.36
  10   1  -4   25.71    2.39
 -10   1   4   19.34    2.34
   9  -1  -4    8.49    1.05
   9  -1  -4    8.30    1.10
  -9  -1   4    9.84    1.10
  -9   1   4    9.92    1.10
   9   1  -4   11.98    1.15
  -8  -1   4   19.82    1.74
   8  -1  -4   17.01    1.74
   8  -1  -4   14.68    1.67
  -8   1   4   13.33    1.70
   8   1  -4   15.79    1.72
  -7  -1   4    0.99    0.24
   7  -1  -4    0.64    0.22
   7  -1  -4    0.96    0.22
   7   1  -4    1.16    0.26
  -7   1   4    0.86    0.23
  -6  -1   4   26.17    2.60
   6  -1  -4   26.53    2.63
   6  -1  -4   23.27    2.57
   6   1  -4   23.20    2.60
  -6   1   4   28.99    2.62
   6   1  -4   24.62    2.55
   5  -1  -4    0.15    0.12
   5  -1  -4    0.52    0.12
  -5  -1   4    0.31    0.12
   5   1  -4    0.37    0.13
   5   1  -4    0.49    0.10
  -5   1   4    0.36    0.12
   4  -1  -4   63.53    5.53
   4  -1  -4   53.34    5.58
  -4  -1   4   53.70    5.52
  -4  -1   4   51.75    5.54
   4  -1  -4   53.23    5.49
   4   1  -4   54.07    5.55
   4   1  -4   59.55    5.51
  -4   1   4   54.42    5.54
  -3  -1   4    4.79    0.53
   3  -1  -4    4.56    0.51
  -3  -1   4    6.01    0.55
   3  -1  -4    4.85    0.57
   3  -1  -4    5.22    0.52
   3   1  -4    4.58    0.54
  -3   1   4    4.56    0.53
   2  -1  -4   23.90    2.38
  -2  -1   4   21.02    2.33
   2  -1  -4   20.34    2.33
   2  -1  -4   26.18    2.32
  -2  -1   4   24.43    2.35
  -2   1   4   22.63    2.34
   2   1  -4   25.27    2.35
  -1  -1   4   16.91    1.60
   1  -1  -4   15.62    1.56
  -1  -1   4   16.05    1.58
   1  -1  -4   16.14    1.59
   1  -1  -4   14.26    1.61
   1   1  -4   16.24    1.58
  -1   1   4   15.37    1.58
   0  -1   4   41.68    3.90
   0  -1   4   35.96    3.92
   0  -1   4   35.95    3.90
   0   1   4   40.07    3.90
   0   1  -4   43.06    3.90
  -1  -1  -4    0.21    0.06
   1  -1   4    0.33    0.05
   1  -1   4    0.20    0.05
   1  -1   4    0.24    0.08
  -1  -1  -4    0.25    0.06
   1   1   4    0.29    0.06
  -1   1  -4    0.34    0.05
   2  -1   4  970.16   95.15
   2  -1   4  977.10   95.31
  -2  -1  -4  902.87   95.21
  -2   1  -4 1000.00   95.15
   3  -1   4   15.64    1.49
  -3  -1  -4   13.56    1.49
   3   1   4   14.55    1.50
   4  -1   4   49.66    5.58
   4  -1   4   46.23    5.54
  -4  -1  -4   61.80    5.57
  -4   1  -4   60.81    5.56
   4   1   4   60.48    5.57
   5  -1   4    8.43    0.94
   5  -1   4    7.74    0.89
  -5  -1  -4    8.89    0.92
   5   1   4    7.87    0.92
  -5   1  -4    8.83    0.91
  -6  -1  -4   26.67    2.60
   6  -1   4   25.49    2.61
   6  -1   4   25.13    2.57
  -6   1  -4   23.37    2.58
   6   1   4   25.04    2.60
  -7  -1  -4    0.38    0.15
   7  -1   4    0.69    0.18
   7  -1   4    0.29    0.18
  -7   1  -4    0.50    0.17
   7   1   4    0.29    0.15
  -8  -1  -4   20.68    2.40
   8  -1   4   22.97    2.39
   8  -1   4   21.81    2.40
  -8   1  -4   22.38    2.42
   8   1   4   28.01    2.46
  -9  -1  -4    2.03    0.41
   9  -1   4    3.02    0.46
   9   1   4    1.82    0.42
  -9   1  -4    2.51    0.46
  10  -1   4    4.83    0.68
 -10  -1  -4    4.59    0.72
  10   1   4    4.39    0.72
 -10   1  -4    4.11    0.72
  11  -1   4    1.61    0.33
 -11  -1  -4    0.64    0.26
 -11   1  -4    2.65    0.47
  11   1   4    0.73    0.27
 -12  -1  -4    2.48    0.48
 -12   1  -4    1.45    0.48
  12   1   4    2.51    0.52
 -11   2   4    0.56    0.24
  11   2  -4    0.59    0.26
 -10  -2   4   -0.06    0.16
 -10   2   4    0.23    0.18
  10   2  -4   -0.09    0.15
  -9  -2   4    3.31    0.44
   9  -2  -4    1.28    0.38
   9   2  -4    1.60    0.37
  -9   2   4    1.77    0.39
  -8  -2   4   11.79    1.37
   8  -2  -4   12.46    1.32
   8  -2  -4   13.30    1.46
   8   2  -4   14.05    1.42
  -8   2   4   12.16    1.40
   7  -2  -4    0.05    0.16
   7  -2  -4    0.30    0.10
  -7  -2   4    0.05    0.11
   7   2  -4    0.25    0.15
  -7   2   4    0.32    0.15
   6  -2  -4   18.36    1.90
   6  -2  -4   20.71    2.05
  -6  -2   4   20.63    1.96
   6   2  -4   16.17    1.96
  -6   2   4   18.88    1.96
  -5  -2   4    0.13    0.09
   5  -2  -4    0.05    0.08
  -5  -2   4    0.08    0.09
   5  -2  -4    0.22    0.06
   5  -2  -4    0.14    0.13
   5   2  -4    0.14    0.04
   5   2  -4    0.11    0.04
   5   2  -4    0.35    0.13
  -5   2   4    0.05    0.08
   4  -2  -4    2.20    0.29
  -4  -2   4    2.40    0.32
   4  -2  -4    2.35    0.41
  -4  -2   4    2.30    0.29
   4  -2  -4    2.40    0.25
   4   2  -4    2.17    0.34
  -4   2   4    2.36    0.30
  -3  -2   4    8.58    0.96
  -3  -2   4    8.80    0.91
   3  -2  -4    9.32    0.94
  -3   2   4    9.24    0.92
   3   2  -4    8.30    0.93
  -2  -2   4   81.19    8.89
  -2  -2   4   93.49    8.83
   2  -2  -4   84.01    8.92
  -2  -2   4   86.70    8.83
  -2   2   4   90.66    8.83
   2   2  -4   98.87    8.86
   1  -2  -4    0.05    0.06
  -1  -2   4    0.27    0.11
   1  -2  -4    0.15    0.10
   1   2  -4    0.21    0.05
   0  -2  -4  219.09   19.07
   0  -2   4  171.10   19.06
   0  -2   4  203.05   19.07
   0  -2  -4  177.40   19.07
  -1  -2  -4   11.17    1.04
  -1  -2  -4    9.13    1.02
   1  -2   4    9.35    1.05
   1  -2   4    9.59    1.03
   1   2   4    9.40    0.97
  -2  -2  -4    5.84    0.62
   2  -2   4    6.02    0.68
  -2  -2  -4    5.67    0.65
  -2  -2  -4    6.28    0.62
   2   2   4    6.36    0.64
  -2   2  -4    6.32    0.62
  -3  -2  -4   13.11    1.32
   3  -2   4   12.62    1.36
  -3  -2  -4   14.10    1.33
  -3   2  -4   12.28    1.32
   3   2   4   13.06    1.35
   4  -2   4   79.24    8.41
   4  -2   4   87.77    8.53
  -4  -2  -4   88.90    8.45
   4  -2   4   99.76    8.48
   4   2   4   70.75    8.45
   5  -2   4   13.14    1.61
   5  -2   4   16.14    1.59
  -5  -2  -4   16.25    1.62
   5   2   4   14.46    1.64
  -5   2  -4   18.24    1.63
   6  -2   4   50.10    5.49
   6  -2   4   51.85    5.41
  -6  -2  -4   55.92    5.43
   6  -2   4   54.90    5.39
  -6   2  -4   60.64    5.45
   6   2   4   50.65    5.45
  -7  -2  -4    4.48    0.50
   7  -2   4    2.95    0.56
   7  -2   4    3.53    0.44
   7   2   4    3.85    0.58
  -7   2  -4    3.31    0.53
  -8  -2  -4    4.75    0.67
   8  -2   4    6.00    0.65
   8  -2   4    6.04    0.74
   8   2   4    5.24    0.71
  -8   2  -4    5.54    0.71
   9  -2   4    0.31    0.21
   9   2   4    0.62    0.24
 -10  -2  -4    7.55    0.98
 -10   2  -4    9.17    1.02
  10   2   4    7.85    1.03
 -11  -2  -4    2.27    0.49
  11   2   4    2.80    0.57
 -11   2  -4    2.11    0.53
  11   3  -4    7.99    1.01
 -11   3   4    6.96    1.13
  10  -3  -4   19.63    2.42
 -10   3   4   26.19    2.41
  10   3  -4   20.58    2.38
  -9  -3   4    8.08    0.94
   9  -3  -4    9.04    1.08
  -9   3   4    8.25    0.98
   9   3  -4    6.93    0.97
  -8  -3   4   16.24    1.58
   8  -3  -4   13.35    1.68
  -8   3   4   13.60    1.59
   8   3  -4   15.00    1.62
   7  -3  -4    3.86    0.70
  -7  -3   4    4.16    0.52
   7   3  -4    4.22    0.63
  -7   3   4    5.13    0.58
  -6  -3   4    8.87    0.89
  -6  -3   4    7.35    0.83
   6  -3  -4    6.78    0.95
   6   3  -4    8.01    0.88
  -6   3   4    7.19    0.86
  -5  -3   4   15.46    1.81
   5  -3  -4   18.29    1.80
   5  -3  -4   20.83    1.94
  -5  -3   4   17.01    1.74
  -5   3   4   16.01    1.77
   5   3  -4   16.92    1.80
   4  -3  -4   75.25    7.76
  -4  -3   4   66.17    7.68
   4  -3  -4   75.66    7.67
  -4  -3   4   79.44    7.60
  -4   3   4   84.07    7.64
   4   3  -4   78.63    7.66
  -3  -3   4    5.77    0.71
   3  -3  -4    6.65    0.78
   3  -3  -4    5.69    0.69
   3   3  -4    6.47    0.67
  -3   3   4    5.86    0.63
   2  -3  -4   32.16    3.33
  -2  -3   4   32.74    3.35
   2  -3  -4   31.66    3.38
   2   3  -4   33.83    3.27
  -1  -3   4   21.69    2.37
  -1  -3   4   26.34    2.42
   1  -3  -4   21.84    2.42
   1  -3  -4   23.58    2.39
   1   3  -4   22.87    2.30
   0  -3  -4    4.75    0.56
   0  -3  -4    4.50    0.54
   0  -3   4    4.25    0.55
   0  -3   4    4.19    0.55
  -1  -3  -4    7.59    0.88
   1  -3   4    7.21    0.89
   1  -3   4    7.78    0.92
  -1  -3  -4    9.10    0.91
   1   3   4    8.05    0.80
  -2  -3  -4  118.62   12.45
  -2  -3  -4  145.77   12.51
   2  -3   4  123.49   12.53
   2  -3   4  112.46   12.48
   2   3   4  121.77   12.41
  -2   3  -4  130.95   12.38
  -3  -3  -4   22.40    2.22
   3  -3   4   20.93    2.32
   3  -3   4   21.11    2.27
   3   3   4   21.27    2.22
  -3   3  -4   22.72    2.18
  -4  -3  -4   12.18    1.26
   4  -3   4   15.53    1.38
  -4  -3  -4   12.82    1.28
   4  -3   4   15.39    1.46
  -4   3  -4   10.83    1.28
   4   3   4   11.34    1.32
  -5  -3  -4    1.72    0.25
   5  -3   4    1.76    0.39
   5  -3   4    1.16    0.28
   5   3   4    1.89    0.32
  -5   3  -4    1.87    0.28
  -6  -3  -4   24.70    2.39
   6  -3   4   25.13    2.44
   6   3   4   20.02    2.42
  -6   3  -4   23.36    2.41
  -7  -3  -4    3.60    0.46
   7  -3   4    4.06    0.67
   7   3   4    3.66    0.58
  -7   3  -4    3.70    0.50
  -8  -3  -4   20.99    2.17
  -8   3  -4   20.03    2.20
   8   3   4   21.15    2.23
   9  -3   4    6.33    0.90
  -9  -3  -4    5.74    0.81
   9   3   4    8.23    0.90
  -9   3  -4    7.52    0.90
  10  -3   4    6.98    0.93
  10   3   4    7.82    1.12
 -10   3  -4    6.51    0.90
  11   3   4    3.50    0.65
  10  -4  -4    0.42    0.33
 -10   4   4    0.77    0.42
  10   4  -4    2.02    0.41
   9  -4  -4    7.06    1.11
   9   4  -4    7.36    0.93
   8  -4  -4    9.73    1.34
   8   4  -4   11.80    1.27
   7  -4  -4   15.12    1.83
   7   4  -4   16.21    1.72
  -6  -4   4   33.73    3.18
   6  -4  -4   25.95    3.24
   6   4  -4   31.08    3.14
   5  -4  -4    2.20    0.40
   5  -4  -4    2.46    0.53
  -5  -4   4    2.62    0.45
   5   4  -4    2.69    0.42
   4  -4  -4    0.11    0.20
  -4  -4   4    0.06    0.12
   4  -4  -4    0.17    0.12
   4   4  -4    0.13    0.10
  -3  -4   4   14.95    1.43
   3  -4  -4   11.32    1.36
   3  -4  -4   11.73    1.43
   3   4  -4   12.37    1.30
  -2  -4   4   46.97    5.17
   2  -4  -4   58.23    5.26
   2  -4  -4   47.62    5.16
   2   4  -4   51.83    5.08
  -1  -4   4   31.09    2.88
   1  -4  -4   29.95    2.93
  -1  -4   4   26.10    2.90
   1  -4  -4   24.02    2.86
   0  -4   4   82.69    8.14
   0  -4  -4   80.38    8.13
   0  -4   4   79.46    8.13
   1  -4   4    2.23    0.45
   1  -4   4    2.78    0.46
  -1  -4  -4    2.22    0.42
  -1  -4  -4    3.32    0.47
   2  -4   4    0.29    0.18
   2  -4   4    0.03    0.11
  -2  -4  -4    0.01    0.10
  -2  -4  -4    0.15    0.12
   2   4   4    0.11    0.06
   3  -4   4    0.39    0.17
  -3  -4  -4    0.41    0.17
   3  -4   4    0.35    0.19
  -3  -4  -4   -0.02    0.13
   3   4   4    0.48    0.13
   4  -4   4   29.61    3.40
   4  -4   4   30.73    3.47
   4   4   4   37.77    3.37
   5  -4   4   -0.02    0.16
   5  -4   4    0.07    0.13
   5   4   4    0.05    0.11
   6  -4   4   26.16    2.68
   6  -4   4   27.26    2.79
   6   4   4   23.55    2.65
   7  -4   4    4.45    0.80
   7   4   4    5.26    0.67
   8  -4   4    0.38    0.27
   8   4   4    0.49    0.24
   9  -4   4    2.04    0.45
   9   4   4    0.47    0.28
  -9   4  -4    1.15    0.34
  10  -4   4    4.80    0.82
  10   4   4    4.65    0.81
 -10   4  -4    4.12    0.73
   9  -5  -4    8.92    1.19
   9   5  -4    7.83    1.03
   8  -5  -4    2.68    0.64
   8   5  -4    2.95    0.54
   7   5  -4    0.79    0.25
   6  -5  -4    8.06    1.05
  -6  -5   4    6.38    0.90
   6   5  -4    7.60    0.92
  -5  -5   4   17.88    2.07
   5  -5  -4   18.56    2.04
   5  -5  -4   20.68    2.20
   4  -5  -4   27.52    2.56
  -4  -5   4   24.80    2.45
   4  -5  -4   17.80    2.37
  -3  -5   4    8.42    0.95
   3  -5  -4    6.93    0.91
   3  -5  -4    7.02    0.98
   2  -5  -4   10.15    1.21
  -2  -5   4    9.35    1.22
   2  -5  -4   12.47    1.32
   1  -5  -4    2.19    0.44
   1  -5  -4    2.06    0.48
  -1  -5   4    2.13    0.45
  -1  -5   4    2.45    0.43
   0  -5   4    3.16    0.57
   0  -5  -4    3.76    0.59
   0  -5  -4    3.22    0.55
   0  -5   4    2.72    0.52
  -1  -5  -4   -0.11    0.12
   1  -5   4   -0.07    0.13
   1  -5   4    0.01    0.14
  -1  -5  -4    0.03    0.13
   2  -5   4   29.11    3.04
  -2  -5  -4   25.84    2.95
   2  -5   4   30.83    3.03
  -2  -5  -4   28.80    3.00
   3  -5   4   30.47    3.24
   3  -5   4   33.06    3.30
  -3  -5  -4   29.00    3.22
   4  -5   4   11.38    1.53
   4  -5   4   14.83    1.52
   5  -5   4   -0.02    0.18
   5  -5   4    0.23    0.20
   6  -5   4    7.36    1.00
   6  -5   4    9.36    1.14
   7  -5   4    9.39    1.25
   7   5   4    9.37    1.12
   8  -5   4   17.04    1.98
   8   5   4   16.49    1.87
   9  -5   4    3.84    0.77
   9   5   4    4.86    0.81
   7  -6  -4   13.20    1.68
   6  -6  -4    6.28    1.08
  -6  -6   4    5.90    0.92
   5  -6  -4    1.76    0.42
   5  -6  -4    1.59    0.49
   4  -6  -4    0.40    0.32
   4  -6  -4    0.37    0.23
  -4  -6   4    0.59    0.27
   3  -6  -4    0.63    0.30
  -3  -6   4    0.38    0.23
   3  -6  -4    0.22    0.20
   2  -6  -4   21.62    2.31
  -2  -6   4   20.31    2.25
   2  -6  -4   19.07    2.21
  -1  -6   4    1.13    0.38
   1  -6  -4    0.88    0.32
   1  -6  -4    1.40    0.43
   0  -6   4   14.99    2.00
   0  -6  -4   21.46    2.07
   0  -6   4   16.72    1.99
   0  -6  -4   20.03    2.03
   1  -6   4    5.16    0.79
  -1  -6  -4    4.74    0.76
   1  -6   4    6.37    0.87
  -1  -6  -4    4.07    0.73
  -2  -6  -4    0.20    0.20
   2  -6   4    0.12    0.17
   2  -6   4   -0.01    0.18
   3  -6   4    0.57    0.30
   3  -6   4    0.30    0.23
   4  -6   4    7.41    1.03
   4  -6   4    8.72    1.12
   5  -6   4   13.67    1.60
   5  -6   4   11.76    1.49
   6  -6   4    6.84    1.10
   7  -6   4    9.21    1.28
  -4  -7   4    1.29    0.41
   4  -7  -4    0.77    0.35
   4  -7  -4    1.02    0.42
   3  -7  -4    8.60    1.26
  -3  -7   4   12.59    1.36
   3  -7  -4   10.42    1.37
  -2  -7   4    2.23    0.54
   2  -7  -4    2.40    0.53
   2  -7  -4    3.11    0.64
   1  -7  -4    1.14    0.34
   1  -7  -4    0.80    0.36
   0  -7  -4    2.93    0.60
   0  -7  -4    2.72    0.58
  -1  -7  -4    5.87    0.92
   1  -7   4    7.80    1.06
   1  -7   4    5.06    0.88
   2  -7   4    5.49    0.98
   2  -7   4    7.98    1.00
  -2  -7  -4    7.02    0.94
   3  -7   4   12.73    1.58
   3  -7   4   13.11    1.59
   4  -7   4    3.91    0.78
   4  -7   4    4.68    0.84
  12   0  -5    3.76    0.62
 -12   0   5    3.81    0.63
  11   0  -5    8.75    1.06
 -11   0   5    8.72    1.07
 -10   0   5    0.03    0.13
  10   0  -5    0.56    0.22
  -9   0   5   33.95    3.27
   9   0  -5   29.22    3.24
   8   0  -5    0.04    0.13
   8   0  -5    0.13    0.13
  -8   0   5    0.24    0.16
   7   0  -5    4.88    0.65
  -7   0   5    4.82    0.66
   7   0  -5    6.88    0.67
   6   0  -5    0.14    0.10
  -6   0   5   -0.03    0.07
   6   0  -5    0.17    0.10
   5   0  -5  146.47   16.33
  -5   0   5  182.16   16.35
   5   0  -5  166.26   16.35
  -4   0   5   -0.04    0.05
   4   0  -5   -0.03    0.04
   4   0  -5   -0.03    0.04
   3   0  -5  212.37   22.31
   3   0  -5  215.40   22.32
  -3   0   5  232.39   22.29
  -3   0   5  242.72   22.32
   2   0  -5   -0.02    0.04
  -2   0   5   -0.04    0.04
   1   0  -5    0.68    0.09
  -1   0   5    0.57    0.10
   0   0  -5    0.04    0.02
   0   0   5    0.00    0.02
   1   0   5   87.19    8.54
  -1   0  -5   85.38    8.53
   2   0   5    0.07    0.05
  -3   0  -5   76.55    7.08
   3   0   5   65.94    7.08
   4   0   5    0.05    0.06
  -4   0  -5    0.01    0.06
  -5   0  -5    0.05    0.08
   5   0   5   -0.03    0.08
   6   0   5    0.04    0.09
  -6   0  -5    0.10    0.10
   7   0   5   26.11    2.90
  -7   0  -5   30.37    2.92
  -8   0  -5   -0.10    0.10
   8   0   5   -0.23    0.12
  -9   0  -5   21.83    2.34
   9   0   5   21.80    2.33
 -11   0  -5    0.16    0.21
  11   0   5    0.07    0.22
 -12   0  -5    3.41    0.61
 -12  -1   5    1.78    0.37
  12   1  -5    0.56    0.29
 -12   1   5    1.03    0.38
  11  -1  -5    2.05    0.39
 -11  -1   5    1.77    0.41
  11   1  -5    1.68    0.42
 -11   1   5    2.03    0.46
  -9  -1   5   28.37    2.66
   9  -1  -5   21.60    2.59
   9  -1  -5   21.87    2.63
  -9   1   5   27.24    2.65
   9   1  -5   28.23    2.66
  -8  -1   5    2.51    0.42
   8  -1  -5    2.16    0.42
   8  -1  -5    2.10    0.38
  -8   1   5    2.73    0.44
   8   1  -5    2.91    0.45
  -7  -1   5   64.42    6.05
   7  -1  -5   71.24    6.09
   7  -1  -5   53.10    6.00
   7   1  -5   55.51    6.03
  -7   1   5   57.20    6.04
   6  -1  -5    1.17    0.28
   6  -1  -5    1.47    0.24
  -6  -1   5    1.17    0.26
   6   1  -5    1.33    0.21
   6   1  -5    1.68    0.29
  -6   1   5    1.41    0.27
   5  -1  -5    9.36    1.04
  -5  -1   5   10.33    1.08
   5  -1  -5    9.83    1.11
   5   1  -5   10.92    1.04
   5   1  -5    9.48    1.08
  -5   1   5    9.83    1.08
   4  -1  -5    5.69    0.79
  -4  -1   5    6.41    0.75
  -4  -1   5    8.99    0.79
   4  -1  -5    8.42    0.76
   4   1  -5    6.22    0.77
   4   1  -5    6.76    0.74
  -4   1   5    7.62    0.78
  -3  -1   5   89.09    8.95
   3  -1  -5   85.30    8.99
   3  -1  -5   95.12    8.93
  -3  -1   5   87.68    8.95
  -3   1   5   93.33    8.95
  -2  -1   5    1.60    0.23
  -2  -1   5    2.02    0.23
   2  -1  -5    1.95    0.27
   2  -1  -5    1.97    0.21
   2   1  -5    1.93    0.23
  -2   1   5    1.99    0.23
  -1  -1   5  423.90   46.80
  -1  -1   5  439.23   46.78
   1  -1  -5  500.72   46.78
   1  -1  -5  496.12   46.78
   1   1  -5  491.62   46.81
  -1   1   5  488.22   46.81
   0  -1   5   13.10    1.42
   0  -1  -5   12.65    1.44
   0  -1  -5   14.51    1.41
   0  -1  -5   14.32    1.41
   0  -1   5   13.36    1.44
   0  -1   5   14.72    1.42
   0   1   5   15.61    1.42
   0   1  -5   14.95    1.42
   1  -1   5   31.67    3.18
  -1  -1  -5   30.93    3.19
  -1   1  -5   35.13    3.18
   1   1   5   30.41    3.19
  -2  -1  -5   86.46    8.10
   2  -1   5   71.29    8.09
   2  -1   5   73.94    8.12
  -2   1  -5   86.81    8.09
   2   1   5   90.17    8.11
   3  -1   5   19.06    1.99
  -3  -1  -5   22.00    2.01
   3   1   5   17.48    2.00
  -3   1  -5   20.38    1.99
   4  -1   5    2.18    0.32
   4  -1   5    2.21    0.35
  -4  -1  -5    2.01    0.33
   4   1   5    2.33    0.34
  -4   1  -5    2.64    0.30
   5  -1   5   22.88    1.98
  -5  -1  -5   19.82    1.98
   5  -1   5   17.84    1.98
   5   1   5   16.90    1.97
  -5   1  -5   18.04    1.97
   6  -1   5    2.35    0.39
   6  -1   5    2.20    0.36
  -6  -1  -5    2.70    0.41
   6   1   5    2.90    0.42
  -6   1  -5    2.41    0.39
  -7  -1  -5   31.52    3.04
   7  -1   5   31.58    3.01
   7  -1   5   30.25    3.03
   7   1   5   24.52    3.01
  -7   1  -5   28.93    3.02
   8  -1   5    1.23    0.29
  -8  -1  -5    1.98    0.36
  -8   1  -5    1.67    0.33
   8   1   5    1.62    0.34
  -9  -1  -5    5.01    0.75
   9  -1   5    4.85    0.66
  -9   1  -5    5.75    0.70
   9   1   5    5.04    0.76
  10  -1   5    1.48    0.33
 -10  -1  -5    1.27    0.36
 -10   1  -5    0.90    0.32
  10   1   5    1.41    0.36
 -11  -1  -5   17.61    1.98
  11  -1   5   17.61    1.95
 -11   1  -5   16.47    2.03
  11   1   5   19.26    1.99
 -12  -1  -5    1.75    0.44
  12   1   5    2.68    0.63
 -12   1  -5    2.56    0.53
 -11  -2   5    7.16    0.88
  11   2  -5    7.28    0.91
 -11   2   5    6.07    0.87
  10  -2  -5    0.25    0.36
 -10  -2   5    0.21    0.18
  10   2  -5    0.02    0.18
 -10   2   5    0.14    0.15
  -9  -2   5   24.13    2.65
   9  -2  -5   26.43    2.73
   9   2  -5   25.11    2.68
  -9   2   5   25.98    2.68
  -8  -2   5    1.04    0.25
   8  -2  -5    0.81    0.17
   8  -2  -5    0.42    0.24
   8   2  -5    0.87    0.26
  -8   2   5    1.10    0.28
   7  -2  -5   -0.01    0.16
   7  -2  -5    0.14    0.08
  -7  -2   5    0.32    0.15
  -7   2   5    0.17    0.13
   7   2  -5    0.02    0.13
  -6  -2   5    4.20    0.53
   6  -2  -5    4.15    0.66
   6  -2  -5    4.38    0.48
   6   2  -5    4.59    0.56
  -6   2   5    4.60    0.55
   5  -2  -5  136.06   13.89
  -5  -2   5  133.57   13.80
   5  -2  -5  137.83   13.78
  -5  -2   5  145.80   13.82
   5  -2  -5  135.27   13.76
   5   2  -5  151.58   13.83
  -5   2   5  131.73   13.81
   5   2  -5  141.78   13.76
  -4  -2   5    3.25    0.37
   4  -2  -5    2.61    0.33
   4  -2  -5    2.93    0.30
   4  -2  -5    3.45    0.50
  -4  -2   5    2.36    0.33
  -4   2   5    3.19    0.35
   4   2  -5    2.31    0.35
   3  -2  -5  146.84   14.02
   3  -2  -5  138.10   14.09
  -3  -2   5  152.24   13.99
  -3  -2   5  132.65   14.04
  -3   2   5  135.64   14.00
   3   2  -5  142.57   14.02
   2  -2  -5    4.59    0.55
  -2  -2   5    5.11    0.51
   2  -2  -5    5.00    0.61
  -2  -2   5    4.45    0.57
   2   2  -5    4.72    0.54
  -2   2   5    5.68    0.53
  -1  -2   5   44.50    4.74
   1  -2  -5   42.62    4.72
   1  -2  -5   45.22    4.76
  -1   2   5   50.62    4.67
   1   2  -5   47.72    4.68
  -1   2   5   50.70    4.67
   0  -2   5    2.98    0.33
   0  -2  -5    2.19    0.30
   0  -2   5    3.32    0.33
   0  -2  -5    2.46    0.32
   0   2  -5    2.43    0.25
   0   2   5    2.34    0.25
   0   2   5    2.20    0.26
  -1  -2  -5   85.89    8.11
   1  -2   5   73.48    8.11
  -1   2  -5   81.92    8.05
   1   2   5   84.03    8.06
  -2  -2  -5   33.32    2.99
   2  -2   5   26.81    3.00
  -2  -2  -5   31.72    2.95
   2   2   5   27.60    2.97
  -2   2  -5   28.64    2.95
  -3  -2  -5   73.68    7.05
   3  -2   5   62.85    7.08
   3  -2   5   68.44    7.14
  -3  -2  -5   71.80    7.06
   3   2   5   75.94    7.08
  -3   2  -5   73.00    7.05
  -4  -2  -5   13.12    1.32
   4  -2   5   14.03    1.39
   4  -2   5   14.44    1.34
   4  -2   5   13.13    1.45
  -4  -2  -5   12.34    1.36
   4   2   5   13.01    1.39
  -4   2  -5   12.34    1.36
   5  -2   5   16.12    1.67
   5  -2   5   13.87    1.58
  -5  -2  -5   17.47    1.60
   5  -2   5   16.17    1.56
  -5   2  -5   13.87    1.58
   5   2   5   14.37    1.61
   6  -2   5    2.67    0.37
   6  -2   5    2.89    0.51
  -6  -2  -5    2.99    0.39
   6  -2   5    3.19    0.37
   6   2   5    2.94    0.46
  -6   2  -5    2.70    0.44
  -7  -2  -5   47.86    4.45
   7  -2   5   46.96    4.43
   7  -2   5   44.57    4.41
   7  -2   5   36.02    4.47
  -7   2  -5   39.10    4.44
   7   2   5   48.85    4.49
  -8  -2  -5    7.44    0.93
   8  -2   5    7.78    0.97
   8  -2   5    7.67    0.89
  -8   2  -5    8.88    0.97
   8   2   5    9.25    0.99
   9  -2   5   26.25    2.91
  -9  -2  -5   27.27    2.89
   9   2   5   30.07    2.97
 -10  -2  -5    1.23    0.33
 -10   2  -5    2.47    0.45
  10   2   5    2.11    0.44
 -11  -2  -5    0.00    0.20
  11   2   5    0.35    0.24
 -11   2  -5    0.11    0.20
  11   3  -5    2.87    0.57
 -11   3   5    2.64    0.56
  10  -3  -5    2.30    0.57
 -10   3   5    4.14    0.63
  10   3  -5    2.74    0.54
   9  -3  -5    5.97    0.96
  -9  -3   5    7.08    0.81
  -9   3   5    6.11    0.82
   9   3  -5    6.86    0.84
  -8  -3   5    2.57    0.39
   8  -3  -5    1.72    0.47
  -8   3   5    2.88    0.46
   8   3  -5    2.10    0.43
  -7  -3   5   43.76    4.37
   7  -3  -5   41.22    4.50
  -7   3   5   45.29    4.41
   7   3  -5   42.56    4.42
   6  -3  -5    0.48    0.24
  -6  -3   5    0.63    0.14
  -6  -3   5    0.53    0.19
   6   3  -5    0.62    0.19
  -6   3   5    0.54    0.17
  -5  -3   5   15.79    1.71
   5  -3  -5   14.15    1.73
   5  -3  -5   16.29    1.86
  -5  -3   5   19.33    1.80
   5   3  -5   18.13    1.77
  -5   3   5   18.18    1.75
   4  -3  -5    0.13    0.10
  -4  -3   5   -0.02    0.09
   4  -3  -5    0.03    0.09
  -4  -3   5   -0.04    0.04
  -4   3   5   -0.01    0.06
   4   3  -5    0.01    0.08
   3  -3  -5   44.38    4.77
   3  -3  -5   53.58    4.71
  -3  -3   5   39.58    4.70
  -3   3   5   47.12    4.64
   3   3  -5   47.95    4.67
   2  -3  -5    4.85    0.71
  -2  -3   5    5.39    0.68
   2  -3  -5    5.16    0.66
   2   3  -5    5.96    0.62
  -2   3   5    6.20    0.58
   1  -3  -5  121.80   12.97
   1  -3  -5  129.79   13.01
   1   3  -5  138.86   12.90
   0  -3   5    8.34    1.06
   0  -3  -5    8.97    1.05
   0  -3   5   12.10    1.09
   0  -3  -5    9.60    1.08
   1  -3   5   13.57    1.61
  -1  -3  -5   18.46    1.61
  -1  -3  -5   16.62    1.60
   1  -3   5   13.30    1.59
   1   3   5   14.16    1.50
  -2  -3  -5    1.88    0.31
  -2  -3  -5    1.43    0.25
   2  -3   5    1.42    0.32
   2  -3   5    0.95    0.25
   2   3   5    1.50    0.19
  -2   3  -5    1.48    0.16
   3  -3   5   26.08    2.62
   3  -3   5   23.91    2.56
  -3  -3  -5   22.93    2.50
  -3   3  -5   25.23    2.47
   3   3   5   25.81    2.51
  -4  -3  -5    6.05    0.62
   4  -3   5    5.92    0.77
  -4  -3  -5    6.14    0.63
   4  -3   5    6.28    0.71
   4   3   5    5.70    0.68
  -4   3  -5    5.55    0.64
  -5  -3  -5   20.79    2.10
   5  -3   5   22.01    2.25
   5  -3   5   24.12    2.18
   5   3   5   16.60    2.13
  -6  -3  -5   22.31    2.27
   6  -3   5   22.77    2.41
   6  -3   5   20.27    2.30
  -6   3  -5   24.02    2.30
   6   3   5   21.70    2.32
  -7  -3  -5    9.73    1.11
   7   3   5   10.10    1.17
  -7   3  -5   10.94    1.15
   8  -3   5    0.75    0.29
  -8  -3  -5    0.75    0.20
  -8   3  -5    0.99    0.26
   8   3   5    1.47    0.33
   9  -3   5    1.27    0.40
  -9  -3  -5    1.64    0.33
  -9   3  -5    1.80    0.40
   9   3   5    2.18    0.45
  10  -3   5    0.67    0.28
  10   3   5    0.87    0.33
 -10   3  -5    0.87    0.31
  11   3   5   15.39    1.95
 -11   3  -5   17.06    1.92
  10  -4  -5    2.25    0.58
  10   4  -5    2.43    0.50
   9  -4  -5   12.29    1.66
   9   4  -5   15.11    1.58
   8  -4  -5    0.43    0.30
   8   4  -5    1.70    0.32
   7  -4  -5    0.11    0.24
   7   4  -5    0.00    0.13
   6  -4  -5    4.01    0.74
  -6  -4   5    4.27    0.64
   6   4  -5    4.37    0.63
   5  -4  -5   28.39    2.68
   5  -4  -5   25.62    2.79
  -5  -4   5   24.90    2.69
   5   4  -5   23.91    2.64
   4  -4  -5    5.99    0.86
  -4  -4   5    4.43    0.69
   4  -4  -5    5.75    0.64
   4   4  -5    4.40    0.57
   3  -4  -5   34.99    3.85
   3  -4  -5   36.54    3.78
  -3  -4   5   35.44    3.80
   3   4  -5   39.59    3.72
  -2  -4   5   16.34    1.86
   2  -4  -5   15.95    1.84
   2  -4  -5   19.12    1.92
   2   4  -5   17.71    1.76
   1  -4  -5    3.78    0.63
  -1  -4   5    3.54    0.58
  -1  -4   5    4.03    0.51
   1  -4  -5    4.97    0.55
   1   4  -5    3.69    0.43
   0  -4  -5    2.42    0.43
   0  -4   5    1.97    0.41
   0  -4  -5    1.90    0.41
   0  -4   5    3.72    0.43
   1  -4   5   48.36    5.35
   1  -4   5   53.78    5.34
  -1  -4  -5   54.82    5.33
  -1  -4  -5   53.12    5.33
   2  -4   5    5.38    0.76
   2  -4   5    6.06    0.79
  -2  -4  -5    6.59    0.77
  -2  -4  -5    6.54    0.74
   2   4   5    6.40    0.66
   3  -4   5   28.72    2.69
   3  -4   5   24.59    2.71
  -3  -4  -5   21.71    2.59
   3   4   5   27.40    2.58
   4  -4   5    6.74    0.79
   4  -4   5    6.01    0.83
   4   4   5    6.18    0.72
   5  -4   5    1.92    0.36
   5  -4   5    1.42    0.40
   5   4   5    1.32    0.29
   6  -4   5    7.68    0.97
   6  -4   5    6.46    0.86
   6   4   5    7.33    0.85
   7  -4   5   10.80    1.35
   7   4   5   11.19    1.29
   8  -4   5   15.03    1.69
   8   4   5   13.65    1.61
   9  -4   5    6.89    0.95
   9   4   5    6.50    1.04
  -9   4  -5    7.45    1.12
  10  -4   5    1.33    0.38
  10   4   5    0.94    0.35
 -10   4  -5    0.18    0.22
   9  -5  -5    8.54    1.20
   9   5  -5    5.53    0.93
   8  -5  -5    6.54    1.03
   8   5  -5    4.38    0.74
   7  -5  -5   19.21    2.23
   7   5  -5   18.90    2.10
  -6  -5   5    2.94    0.55
   6  -5  -5    4.30    0.77
   6   5  -5    2.90    0.54
  -5  -5   5    3.67    0.61
   5  -5  -5    3.89    0.59
   5  -5  -5    3.05    0.69
   4  -5  -5    1.10    0.37
   4  -5  -5    1.59    0.35
  -4  -5   5    1.06    0.31
   3  -5  -5    0.57    0.29
  -3  -5   5    0.63    0.25
   3  -5  -5    1.08    0.29
   2  -5  -5    2.12    0.42
  -2  -5   5    2.10    0.44
   2  -5  -5    1.42    0.42
   1  -5  -5   30.70    3.08
  -1  -5   5   28.60    3.09
   1  -5  -5   28.39    3.10
   0  -5   5   15.72    1.71
   0  -5  -5   15.19    1.72
   0  -5  -5   14.43    1.72
   0  -5   5   17.00    1.76
   1  -5   5   10.88    1.28
   1  -5   5   13.15    1.31
  -1  -5  -5   10.33    1.24
  -1  -5  -5    9.44    1.23
  -2  -5  -5    5.07    0.75
   2  -5   5    4.16    0.75
  -2  -5  -5    5.51    0.68
   2  -5   5    5.32    0.79
   3  -5   5   10.19    1.23
   3  -5   5   10.51    1.27
   4  -5   5   22.53    2.25
   4  -5   5   18.57    2.27
   5  -5   5   19.62    2.07
   5  -5   5   17.97    2.14
   6  -5   5   13.25    1.64
   6  -5   5   13.81    1.56
   7  -5   5    1.50    0.46
   7   5   5    1.57    0.38
   8  -5   5    0.62    0.29
   8   5   5    0.07    0.19
   9  -5   5    2.51    0.57
   9   5   5    1.90    0.48
   7  -6  -5    0.34    0.32
  -6  -6   5    0.23    0.21
   5  -6  -5   20.96    2.49
   5  -6  -5   24.01    2.66
  -5  -6   5   25.02    2.55
   4  -6  -5    7.37    0.90
  -4  -6   5    6.16    0.97
   4  -6  -5    6.43    1.07
   3  -6  -5   14.54    1.91
  -3  -6   5   19.56    2.00
   3  -6  -5   19.65    2.07
  -2  -6   5    3.16    0.60
   2  -6  -5    2.52    0.53
   2  -6  -5    3.20    0.62
   1  -6  -5    1.80    0.47
   1  -6  -5    2.06    0.45
  -1  -6   5    1.69    0.45
   0  -6  -5    7.98    1.14
   0  -6   5   12.91    1.27
   0  -6   5    8.54    1.13
   0  -6  -5   11.10    1.23
   1  -6   5    9.06    0.99
   1  -6   5    6.23    1.01
  -1  -6  -5    6.25    0.92
  -1  -6  -5    7.44    0.94
  -2  -6  -5   17.41    1.93
   2  -6   5   17.14    1.96
   3  -6   5   17.52    1.80
   3  -6   5   13.37    1.75
   4  -6   5    6.92    0.97
   4  -6   5    7.80    1.03
   5  -6   5    0.10    0.21
   6  -6   5    3.02    0.67
   7  -6   5   13.43    1.68
  -4  -7   5    0.09    0.23
   4  -7  -5    0.04    0.27
   4  -7  -5    0.13    0.20
  -3  -7   5    5.28    0.86
   3  -7  -5    4.65    0.79
  -2  -7   5   10.58    1.27
   2  -7  -5    9.62    1.26
   2  -7  -5    8.58    1.18
   1  -7  -5   12.40    1.53
  -1  -7   5   14.58    1.60
   1  -7  -5   12.18    1.57
   0  -7   5   16.41    1.77
   0  -7  -5   13.37    1.71
   0  -7  -5   14.46    1.70
  -1  -7  -5    1.48    0.41
   1  -7   5    1.75    0.49
   2  -7   5    0.16    0.25
   2  -7   5    0.41    0.27
   3  -7   5    6.91    1.10
   3  -7   5    7.24    1.01
   4  -7   5    7.92    1.11
  12   0  -6    9.86    1.21
 -12   0   6    9.87    1.25
 -10   0   6    6.26    0.80
  10   0  -6    6.23    0.79
  -9   0   6   -0.08    0.11
   9   0  -6    0.26    0.16
   8   0  -6  100.73    8.72
  -8   0   6   79.83    8.70
   8   0  -6   81.06    8.69
  -7   0   6   -0.10    0.07
   7   0  -6    0.07    0.10
   7   0  -6    0.07    0.09
   6   0  -6   55.42    5.88
  -6   0   6   52.12    5.88
   6   0  -6   68.58    5.90
  -5   0   6    0.07    0.08
   5   0  -6    0.03    0.07
   5   0  -6    0.08    0.07
   4   0  -6    2.64    0.35
  -4   0   6    2.69    0.37
   4   0  -6    3.86    0.39
   3   0  -6    0.00    0.05
  -3   0   6    0.00    0.05
  -3   0   6    0.00    0.02
   3   0  -6    0.00    0.05
   2   0  -6   99.27    9.86
  -2   0   6   99.90    9.87
  -1   0   6    0.01    0.03
   1   0  -6   -0.02    0.02
   0   0   6   45.18    4.83
   0   0  -6   52.18    4.83
   1   0   6    0.01    0.03
  -1   0  -6    0.02    0.03
   2   0   6  339.70   33.52
  -2   0  -6  338.93   33.51
   3   0   6    0.02    0.05
  -3   0  -6    0.01    0.04
   4   0   6  114.39   11.57
  -4   0  -6  118.57   11.57
   5   0   6    0.03    0.08
  -5   0  -6   -0.10    0.05
   6   0   6   56.69    5.50
  -6   0  -6   52.47    5.49
   7   0   6    0.10    0.11
  -7   0  -6    0.15    0.12
   8   0   6    3.30    0.54
  -8   0  -6    3.20    0.52
  -9   0  -6    0.10    0.15
   9   0   6    0.75    0.21
 -10   0  -6   34.64    3.50
  10   0   6   31.99    3.49
 -11   0  -6    0.00    0.19
  11   0   6   -0.05    0.21
 -12   0  -6   19.58    2.24
  12   0   6   18.86    2.16
 -12  -1   6    8.42    1.07
  12   1  -6    7.71    1.01
 -12   1   6    7.50    1.16
 -11  -1   6    4.40    0.71
  11  -1  -6    4.82    0.68
  11   1  -6    5.03    0.79
 -11   1   6    4.27    0.73
 -10  -1   6   51.03    4.62
  10  -1  -6   39.23    4.54
  10   1  -6   42.24    4.60
 -10   1   6   48.32    4.61
   9  -1  -6    0.46    0.17
   9  -1  -6    0.09    0.15
  -9  -1   6    0.19    0.16
   9   1  -6    0.11    0.16
  -9   1   6    0.24    0.16
   8  -1  -6    7.02    0.82
  -8  -1   6    7.07    0.86
   8  -1  -6    6.23    0.87
  -8   1   6    8.22    0.87
   8   1  -6    8.34    0.88
   7  -1  -6    0.11    0.09
   7  -1  -6   -0.06    0.08
  -7  -1   6    0.12    0.11
  -7   1   6    0.06    0.11
   7   1  -6   -0.06    0.08
  -6  -1   6   63.51    5.92
   6  -1  -6   58.24    5.87
   6  -1  -6   50.71    5.93
   6   1  -6   58.92    5.87
   6   1  -6   53.63    5.90
  -6   1   6   68.57    5.93
   5  -1  -6   -0.07    0.04
   5  -1  -6    0.04    0.09
  -5  -1   6    0.05    0.04
  -5  -1   6   -0.02    0.07
   5   1  -6   -0.04    0.06
   5   1  -6    0.02    0.05
  -5   1   6    0.02    0.08
  -4  -1   6  132.91   13.44
  -4  -1   6  132.01   13.46
   4  -1  -6  152.73   13.52
   4  -1  -6  125.78   13.43
   4   1  -6  155.40   13.44
  -4   1   6  128.22   13.46
   4   1  -6  123.77   13.46
  -3  -1   6    2.00    0.25
   3  -1  -6    2.14    0.33
   3  -1  -6    2.04    0.24
  -3  -1   6    1.99    0.26
  -3   1   6    1.68    0.25
   3   1  -6    2.76    0.28
   2  -1  -6   16.05    1.80
  -2  -1   6   15.37    1.75
  -2  -1   6   20.43    1.78
   2  -1  -6   17.81    1.74
   2   1  -6   19.53    1.77
  -2   1   6   15.79    1.75
   1  -1  -6   10.26    0.93
   1  -1  -6    7.55    0.87
  -1  -1   6    8.77    0.90
  -1  -1   6    9.15    0.88
   1   1  -6    9.24    0.89
  -1   1   6    7.94    0.88
   0  -1   6   87.71    8.18
   0  -1  -6   75.98    8.18
   0  -1  -6   78.05    8.21
   0   1  -6   86.69    8.18
   0   1   6   85.04    8.18
   1  -1   6   19.00    2.14
  -1  -1  -6   21.65    2.15
  -1   1  -6   21.68    2.14
   1   1   6   23.77    2.15
  -2  -1  -6   30.93    3.11
   2  -1   6   31.18    3.11
   2   1   6   32.09    3.12
  -2   1  -6   30.41    3.10
  -3  -1  -6    1.38    0.20
   3  -1   6    1.06    0.17
  -3   1  -6    1.01    0.17
   3   1   6    0.80    0.18
   4  -1   6   18.37    1.83
   4  -1   6   15.99    1.85
  -4  -1  -6   19.14    1.85
  -4   1  -6   18.14    1.83
   5  -1   6    8.23    0.81
  -5  -1  -6    7.38    0.81
   5  -1   6    5.63    0.79
   5   1   6    6.97    0.81
  -5   1  -6    8.34    0.81
   6  -1   6   15.38    1.46
   6  -1   6   12.04    1.44
  -6  -1  -6   12.52    1.45
   6   1   6   12.78    1.46
  -6   1  -6   16.15    1.47
   7  -1   6    0.63    0.20
  -7  -1  -6    0.89    0.24
   7   1   6    0.61    0.23
  -7   1  -6    0.89    0.23
  -8  -1  -6   56.02    5.04
   8  -1   6   44.53    4.99
   8   1   6   41.96    5.01
  -8   1  -6   56.16    5.04
  -9  -1  -6    1.07    0.26
   9  -1   6    0.82    0.24
   9   1   6    0.38    0.22
  10  -1   6    7.96    0.96
 -10  -1  -6    7.57    0.99
 -10   1  -6    9.22    1.01
  10   1   6    6.97    0.98
 -11  -1  -6    2.61    0.48
  11  -1   6    1.86    0.42
  11   1   6    3.20    0.53
 -11  -2   6    2.71    0.49
 -11   2   6    3.41    0.57
 -10  -2   6    2.55    0.49
  10  -2  -6    2.76    0.56
 -10   2   6    2.43    0.49
  10   2  -6    3.72    0.57
   9  -2  -6    0.92    0.36
  -9  -2   6    1.88    0.37
   9   2  -6    2.54    0.41
  -9   2   6    1.51    0.34
   8  -2  -6   31.50    3.59
  -8  -2   6   33.02    3.53
   8  -2  -6   37.74    3.48
  -8   2   6   35.62    3.55
   8   2  -6   33.48    3.56
   7  -2  -6    8.00    0.91
   7  -2  -6    7.06    0.76
  -7  -2   6    6.96    0.81
  -7   2   6    5.77    0.81
   7   2  -6    8.12    0.85
   6  -2  -6   12.94    1.31
   6  -2  -6   14.29    1.46
  -6  -2   6   13.72    1.36
   6   2  -6   13.67    1.38
  -6   2   6    9.79    1.34
  -5  -2   6   14.08    1.44
  -5  -2   6   12.69    1.42
   5  -2  -6   14.10    1.39
   5  -2  -6   12.72    1.39
   5   2  -6   16.63    1.47
  -5   2   6   12.70    1.43
  -4  -2   6   15.82    1.56
   4  -2  -6   14.77    1.49
   4  -2  -6   16.14    1.53
  -4  -2   6   12.67    1.52
   4  -2  -6   14.21    1.62
   4   2  -6   13.77    1.55
  -4   2   6   17.34    1.55
   3  -2  -6    8.07    0.77
   3  -2  -6    7.74    0.85
  -3  -2   6    7.47    0.75
  -3  -2   6    6.25    0.79
   3   2  -6    6.86    0.77
  -3   2   6    6.70    0.76
  -2  -2   6   29.61    3.05
   2  -2  -6   26.21    3.02
  -2  -2   6   31.82    2.99
  -2   2   6   31.94    3.00
   2   2  -6   30.24    3.01
   1  -2  -6    2.57    0.41
  -1  -2   6    3.57    0.37
   1  -2  -6    2.52    0.33
  -1   2   6    2.71    0.29
   1   2  -6    2.71    0.30
   0  -2  -6   78.34    7.69
   0  -2   6   72.06    7.68
   0   2  -6   81.17    7.62
   0   2   6   76.15    7.62
   1  -2   6   30.06    2.73
  -1  -2  -6   24.40    2.69
   1   2   6   25.81    2.65
  -1   2  -6   26.71    2.64
   2  -2   6    0.04    0.08
   2  -2   6    0.03    0.06
  -2  -2  -6    0.01    0.04
  -2  -2  -6    0.04    0.03
   2   2   6    0.01    0.04
  -2   2  -6   -0.04    0.03
   3  -2   6    9.80    0.94
  -3  -2  -6    9.91    0.98
   3  -2   6    8.33    1.00
   3  -2   6    9.14    1.05
   3  -2   6    9.39    0.94
  -3  -2  -6   10.11    0.98
  -3   2  -6    8.33    0.97
   3   2   6    9.89    1.00
  -4  -2  -6  218.32   23.02
   4  -2   6  263.13   23.09
   4  -2   6  223.77   23.13
  -4  -2  -6  242.62   23.06
   4  -2   6  220.13   23.03
  -4   2  -6  218.74   23.05
   4   2   6  246.53   23.09
   5  -2   6   15.15    1.77
  -5  -2  -6   16.51    1.78
   5  -2   6   18.10    1.86
   5  -2   6   16.93    1.75
  -5   2  -6   18.05    1.78
   5   2   6   19.11    1.81
  -6  -2  -6   52.72    5.60
   6  -2   6   62.08    5.58
   6  -2   6   52.15    5.59
   6  -2   6   52.30    5.66
  -6   2  -6   50.34    5.60
   6   2   6   65.81    5.65
   7  -2   6    0.58    0.15
  -7  -2  -6    0.77    0.18
   7  -2   6    0.38    0.14
   7  -2   6    0.66    0.23
  -7   2  -6    0.21    0.15
   7   2   6    0.50    0.19
  -8  -2  -6    2.25    0.39
   8  -2   6    2.20    0.35
   8  -2   6    2.31    0.43
  -8   2  -6    2.11    0.42
   8   2   6    2.21    0.44
   9   2   6    0.45    0.24
  -9   2  -6    1.17    0.27
 -10  -2  -6   11.43    1.30
 -10   2  -6   11.00    1.35
  10   2   6   10.98    1.36
 -11  -2  -6   -0.10    0.16
  11   2   6    0.17    0.23
 -11   2  -6   -0.08    0.21
  11   3  -6    1.17    0.37
 -11   3   6    0.69    0.29
  10   3  -6   13.75    1.55
 -10   3   6   13.01    1.51
   9  -3  -6    2.53    0.57
  -9  -3   6    3.02    0.45
   9   3  -6    2.27    0.47
  -9   3   6    2.96    0.52
   8  -3  -6    0.99    0.34
  -8  -3   6    0.86    0.22
   8   3  -6    1.15    0.30
  -8   3   6    0.69    0.24
   7  -3  -6    0.19    0.21
  -7  -3   6    0.32    0.14
  -7   3   6    0.50    0.18
   7   3  -6    0.41    0.17
  -6  -3   6   62.00    5.75
   6  -3  -6   53.87    5.84
  -6  -3   6   58.85    5.70
  -6   3   6   58.57    5.73
   6   3  -6   50.74    5.73
  -5  -3   6   15.47    1.94
   5  -3  -6   20.23    1.92
   5  -3  -6   17.64    2.03
  -5  -3   6   19.95    1.89
   5   3  -6   18.01    1.93
  -5   3   6   19.03    1.92
   4  -3  -6   50.21    4.77
  -4  -3   6   41.66    4.78
  -4  -3   6   43.80    4.70
   4   3  -6   50.41    4.76
  -4   3   6   50.83    4.74
   3  -3  -6   26.11    2.57
  -3  -3   6   22.05    2.58
   3  -3  -6   22.18    2.63
  -3   3   6   26.45    2.51
   3   3  -6   26.80    2.54
  -2  -3   6    2.04    0.37
   2  -3  -6    2.52    0.43
   2  -3  -6    1.95    0.33
  -2   3   6    2.31    0.24
   2   3  -6    2.15    0.27
   1  -3  -6    6.36    0.78
   1  -3  -6    6.34    0.75
  -1  -3   6    6.76    0.77
   1   3  -6    6.61    0.68
   0  -3  -6    8.49    0.81
   0  -3   6    6.25    0.78
   0  -3   6    6.49    0.80
   0  -3  -6    6.94    0.81
   0   3  -6    7.10    0.70
   0   3   6    6.74    0.69
   1  -3   6   53.29    4.81
  -1  -3  -6   47.13    4.79
   1  -3   6   51.19    4.82
  -1  -3  -6   45.55    4.78
  -1   3  -6   44.90    4.69
   1   3   6   44.98    4.70
   2  -3   6   75.88    6.51
  -2  -3  -6   70.08    6.46
   2  -3   6   59.34    6.51
   2   3   6   58.52    6.40
  -2   3  -6   61.13    6.38
   3  -3   6   12.76    1.18
  -3  -3  -6    9.43    1.10
   3  -3   6   10.14    1.20
   3   3   6   11.04    1.11
  -3   3  -6   10.15    1.07
   4  -3   6    6.41    0.76
  -4  -3  -6    6.08    0.69
  -4  -3  -6    6.58    0.68
   4  -3   6    7.34    0.85
  -4   3  -6    6.38    0.70
   4   3   6    6.93    0.74
   5  -3   6    0.12    0.17
  -5  -3  -6    0.63    0.13
   5  -3   6    0.32    0.15
   5   3   6    0.32    0.15
   6  -3   6   26.80    3.12
   6  -3   6   36.11    3.08
  -6  -3  -6   27.40    3.01
  -6   3  -6   32.08    3.04
   6   3   6   26.44    3.05
  -7  -3  -6    0.82    0.19
   7  -3   6    0.20    0.20
   7   3   6    0.69    0.23
  -7   3  -6    0.68    0.21
  -8  -3  -6   36.44    4.27
   8  -3   6   44.74    4.39
  -8   3  -6   42.37    4.33
   8   3   6   46.75    4.37
   9  -3   6    1.00    0.33
  -9  -3  -6    1.52    0.33
  -9   3  -6    1.58    0.39
   9   3   6    1.68    0.39
  10   3   6    6.83    1.03
 -10   3  -6    5.55    0.93
  11   3   6    1.20    0.36
 -11   3  -6    1.45    0.37
  10  -4  -6    1.97    0.53
  10   4  -6    2.37    0.50
   9  -4  -6    5.67    0.99
   9   4  -6    6.14    0.79
   8  -4  -6   34.98    3.34
   8   4  -6   27.00    3.14
   7  -4  -6    4.27    0.80
   7   4  -6    4.48    0.67
   6  -4  -6   21.60    2.03
  -6  -4   6   14.87    1.84
   6   4  -6   16.94    1.83
   5  -4  -6    3.69    0.46
   5  -4  -6    3.31    0.63
  -5  -4   6    3.53    0.56
   5   4  -6    2.76    0.47
   4  -4  -6   -0.02    0.17
  -4  -4   6    0.10    0.14
   4  -4  -6   -0.01    0.11
   4   4  -6    0.16    0.11
   3  -4  -6    8.55    1.04
  -3  -4   6    8.66    1.07
   3  -4  -6    9.03    1.13
   3   4  -6   10.36    1.00
   2  -4  -6   36.30    3.89
   2  -4  -6   34.44    3.95
  -2  -4   6   44.46    3.96
   2   4  -6   38.03    3.81
   1  -4  -6   14.37    1.58
  -1  -4   6   17.52    1.60
   1  -4  -6   12.65    1.52
   1   4  -6   13.60    1.43
   0  -4   6   21.27    2.29
   0  -4   6   23.49    2.29
   0  -4  -6   19.80    2.28
   0  -4  -6   21.80    2.27
  -1  -4  -6   21.95    2.05
  -1  -4  -6   16.08    2.01
   1  -4   6   19.19    2.05
   1  -4   6   19.44    2.05
   1   4   6   18.97    1.94
  -2  -4  -6    0.74    0.21
   2  -4   6    1.28    0.31
  -2  -4  -6    0.92    0.24
   2  -4   6    0.88    0.26
   2   4   6    0.72    0.14
   3  -4   6    7.49    0.76
  -3  -4  -6    4.59    0.65
   3  -4   6    7.09    0.81
   3   4   6    5.37    0.63
   4  -4   6   30.96    3.12
   4  -4   6   25.93    3.15
   4   4   6   32.22    3.06
   5  -4   6   28.63    2.70
   5  -4   6   23.37    2.58
   5   4   6   22.78    2.53
   6  -4   6   22.66    2.26
   6  -4   6   17.60    2.12
   6   4   6   20.66    2.13
   7  -4   6    0.33    0.22
   7   4   6    0.63    0.22
   8  -4   6    2.26    0.52
  -8   4  -6    2.06    0.50
   8   4   6    3.12    0.54
   9  -4   6    0.22    0.23
   9   4   6    1.12    0.33
  -9   4  -6    0.43    0.25
  10   4   6   18.58    1.99
 -10   4  -6   16.33    1.97
   9  -5  -6    3.46    0.81
   9   5  -6    5.20    0.74
   8  -5  -6    7.12    1.15
   8   5  -6    6.94    0.89
   7   5  -6    0.84    0.24
   6  -5  -6    6.74    1.10
  -6  -5   6    7.79    0.91
   6   5  -6    6.51    0.88
   5  -5  -6   20.69    2.36
  -5  -5   6   20.93    2.27
   4  -5  -6   50.41    4.43
  -4  -5   6   38.05    4.41
   4  -5  -6   40.07    4.50
  -3  -5   6    8.63    1.17
   3  -5  -6    9.48    1.23
   3  -5  -6   11.67    1.18
   2  -5  -6    4.09    0.66
  -2  -5   6    5.54    0.67
   2  -5  -6    3.74    0.71
  -1  -5   6    5.62    0.89
   1  -5  -6    7.49    0.83
   1  -5  -6    5.83    0.83
   0  -5   6   12.53    1.36
   0  -5  -6   11.55    1.37
   0  -5  -6   11.60    1.35
   1  -5   6   17.49    2.14
  -1  -5  -6   18.53    2.14
   1  -5   6   21.57    2.20
  -1  -5  -6   22.68    2.17
   2  -5   6   22.50    2.55
  -2  -5  -6   21.20    2.50
   2  -5   6   28.83    2.59
  -2  -5  -6   23.21    2.49
   3  -5   6    5.24    0.84
   3  -5   6    5.55    0.74
   4  -5   6    6.17    0.82
   4  -5   6    5.15    0.81
   5  -5   6    2.47    0.48
   5  -5   6    2.30    0.54
   6  -5   6    2.78    0.59
   6  -5   6    2.45    0.49
   7  -5   6    5.85    0.97
   7   5   6    6.81    0.85
   8  -5   6   20.53    2.03
   8   5   6   14.25    1.86
   9  -5   6    2.71    0.58
   9   5   6    2.27    0.55
   7  -6  -6    2.96    0.73
   6  -6  -6    8.95    1.36
  -6  -6   6    8.42    1.09
   5  -6  -6    0.96    0.39
  -5  -6   6    1.21    0.36
   4  -6  -6    3.93    0.77
  -4  -6   6    3.75    0.68
   4  -6  -6    3.09    0.58
  -3  -6   6    6.62    0.89
   3  -6  -6    6.45    0.85
   3  -6  -6    6.49    1.03
   2  -6  -6    9.07    1.17
  -2  -6   6    7.69    1.11
   2  -6  -6   10.00    1.11
   1  -6  -6   31.14    3.17
  -1  -6   6   26.86    3.13
   1  -6  -6   29.83    3.11
   0  -6  -6   19.27    2.11
   0  -6  -6   18.25    2.08
   0  -6   6   19.06    2.12
   1  -6   6    7.29    0.95
  -1  -6  -6    6.96    0.97
  -1  -6  -6    7.80    0.97
   1  -6   6    8.04    1.01
   2  -6   6    0.51    0.25
   2  -6   6    0.22    0.21
   3  -6   6    9.61    1.22
   3  -6   6    9.74    1.22
   4  -6   6   12.12    1.43
   4  -6   6   10.77    1.38
   5  -6   6   17.10    1.93
   5  -6   6   15.54    1.86
   6  -6   6    2.65    0.60
   6  -6   6    2.53    0.61
   4  -7  -6    1.55    0.54
   4  -7  -6    2.92    0.55
  -4  -7   6    1.17    0.45
   3  -7  -6   11.37    1.39
  -3  -7   6    9.14    1.29
   3  -7  -6    9.80    1.24
  -2  -7   6    2.30    0.55
   2  -7  -6    1.91    0.47
  -1  -7   6    1.00    0.37
   1  -7  -6    1.28    0.41
   1  -7  -6    1.41    0.39
   0  -7   6    6.11    0.98
   0  -7  -6    6.35    0.94
   0  -7  -6    5.46    0.92
   1  -7   6   13.14    1.62
   2  -7   6   16.38    1.93
   3  -7   6    8.01    1.28
   3  -7   6    9.89    1.20
   4  -7   6    1.56    0.46
   4  -7   6    1.70    0.48
  12   0  -7    2.59    0.44
 -12   0   7    1.49    0.41
  11   0  -7   41.62    3.76
 -11   0   7   30.62    3.76
  10   0  -7   -0.10    0.13
 -10   0   7    0.35    0.19
   9   0  -7    7.90    0.99
  -9   0   7    9.54    1.03
  -8   0   7    0.12    0.13
   8   0  -7    0.11    0.14
   8   0  -7    0.31    0.14
  -7   0   7   12.29    1.46
   7   0  -7   15.44    1.48
   7   0  -7   13.21    1.46
   6   0  -7    0.05    0.08
  -6   0   7    0.07    0.09
   6   0  -7   -0.03    0.07
   5   0  -7  158.69   15.75
   4   0  -7   -0.01    0.06
   4   0  -7    0.07    0.07
  -4   0   7    0.08    0.07
   3   0  -7   83.67    8.59
  -3   0   7   84.08    8.59
  -3   0   7   95.20    8.55
   3   0  -7   82.16    8.58
  -2   0   7    0.02    0.04
   2   0  -7    0.04    0.04
   1   0  -7   80.15    7.50
  -1   0   7   71.25    7.50
   0   0   7    0.10    0.05
   0   0  -7    0.06    0.04
  -1   0  -7  418.45   36.88
   1   0   7  327.75   36.90
  -2   0  -7    0.02    0.04
   2   0   7   -0.02    0.04
  -3   0  -7   61.72    5.61
   3   0   7   50.79    5.61
  -4   0  -7    0.01    0.06
   4   0   7    0.05    0.06
  -5   0  -7   12.11    1.29
  -6   0  -7    0.04    0.09
   6   0   7    0.07    0.10
   7   0   7   35.89    3.73
  -7   0  -7   37.08    3.74
  -8   0  -7    0.22    0.16
   8   0   7   -0.11    0.11
   9   0   7   18.95    2.05
  -9   0  -7   19.02    2.06
  11   0   7    1.29    0.40
 -11   0  -7    2.07    0.49
  12   1  -7    1.64    0.42
 -12   1   7    2.14    0.50
  11  -1  -7    0.57    0.24
 -11  -1   7    0.39    0.23
 -11   1   7    0.56    0.25
  11   1  -7    1.31    0.31
 -10   1   7    2.32    0.47
  10   1  -7    3.00    0.50
   9  -1  -7   24.95    2.70
  -9  -1   7   25.50    2.69
   9  -1  -7   23.78    2.64
  -9   1   7   28.69    2.70
   8  -1  -7    1.48    0.26
   8  -1  -7    0.72    0.24
  -8  -1   7    1.03    0.26
  -8   1   7    1.28    0.28
   8   1  -7    0.81    0.25
   7  -1  -7   57.79    5.21
   7  -1  -7   55.37    5.13
  -7  -1   7   44.28    5.14
   7   1  -7   43.44    5.14
  -7   1   7   55.08    5.16
   6  -1  -7    1.10    0.26
  -6  -1   7    0.89    0.22
   6  -1  -7    1.29    0.22
   6   1  -7    1.06    0.24
   6   1  -7    1.05    0.20
  -6   1   7    1.25    0.25
   5  -1  -7    7.90    1.01
  -5  -1   7    9.17    0.94
   5  -1  -7    8.17    0.95
  -5  -1   7    9.06    0.98
  -5   1   7   10.40    0.99
   5   1  -7   11.27    1.00
   5   1  -7    8.24    0.95
   4  -1  -7   19.33    2.20
   4  -1  -7   24.91    2.15
  -4  -1   7   21.46    2.15
  -4   1   7   23.71    2.17
  -4   1   7   19.60    2.11
   4   1  -7   18.76    2.16
   3  -1  -7    5.94    0.66
  -3  -1   7    5.76    0.61
   3  -1  -7    5.61    0.59
  -3  -1   7    5.20    0.61
   3   1  -7    5.17    0.61
  -3   1   7    6.51    0.62
   2  -1  -7    0.07    0.07
  -2  -1   7    0.10    0.06
   2  -1  -7    0.17    0.05
  -2  -1   7    0.12    0.05
   2   1  -7    0.15    0.06
  -2   1   7    0.13    0.06
   1  -1  -7  176.96   18.00
  -1  -1   7  168.64   18.01
  -1  -1   7  181.61   18.02
  -1   1   7  178.70   18.01
   1   1  -7  205.44   18.01
   0  -1  -7    1.90    0.21
   0  -1   7    1.80    0.21
   0   1  -7    1.68    0.21
   0   1   7    2.06    0.22
   1  -1   7   49.49    5.43
  -1  -1  -7   56.40    5.43
   1   1   7   55.42    5.43
  -1   1  -7   57.59    5.43
  -2  -1  -7   69.68    6.73
   2  -1   7   60.15    6.72
   2   1   7   71.15    6.74
  -2   1  -7   70.25    6.72
  -3  -1  -7   46.02    4.75
   3   1   7   48.20    4.76
  -3   1  -7   48.32    4.74
  -4  -1  -7    8.27    0.93
   4  -1   7    8.43    0.93
   4   1   7    9.15    0.95
  -4   1  -7    8.92    0.93
  -5  -1  -7   90.93    9.85
   5   1   7  107.78    9.87
  -5   1  -7   98.43    9.85
   6  -1   7    1.10    0.24
  -6  -1  -7    1.05    0.25
  -6   1  -7    1.32    0.26
   6   1   7    1.14    0.26
   7  -1   7    2.78    0.45
  -7  -1  -7    3.55    0.50
   7   1   7    3.15    0.51
  -7   1  -7    2.49    0.45
   8  -1   7    0.40    0.16
  -8   1  -7    0.80    0.20
   8   1   7    0.51    0.20
  -9  -1  -7   35.69    3.66
   9  -1   7   32.25    3.62
   9   1   7   32.52    3.66
  -9   1  -7   41.35    3.69
 -10  -1  -7    0.15    0.21
  10  -1   7    0.35    0.20
 -10   1  -7    0.78    0.28
  10   1   7    0.30    0.22
  11  -1   7   13.36    1.44
 -11  -1  -7    9.95    1.35
 -11   1  -7   12.03    1.42
  11   1   7   10.89    1.37
 -11  -2   7   10.84    1.29
 -11   2   7   11.23    1.30
  11   2  -7   11.23    1.32
  10  -2  -7    4.83    0.87
 -10  -2   7    5.51    0.77
  10   2  -7    5.81    0.72
 -10   2   7    4.28    0.74
   9  -2  -7    1.72    0.47
  -9  -2   7    2.94    0.46
   9   2  -7    2.55    0.48
  -9   2   7    3.10    0.49
   8  -2  -7    4.36    0.53
   8  -2  -7    4.95    0.74
  -8  -2   7    4.82    0.59
  -8   2   7    4.62    0.60
   8   2  -7    4.22    0.66
   7  -2  -7    0.13    0.08
  -7  -2   7    0.23    0.13
   7  -2  -7    0.16    0.16
   7   2  -7    0.15    0.13
  -7   2   7    0.11    0.12
   6  -2  -7    2.14    0.26
  -6  -2   7    2.23    0.35
  -6  -2   7    1.99    0.32
   6  -2  -7    2.39    0.45
   6   2  -7    2.01    0.37
  -6   2   7    2.06    0.36
   5  -2  -7   50.06    5.03
  -5  -2   7   49.70    4.95
   5  -2  -7   52.19    4.90
  -5   2   7   45.64    4.94
   5   2  -7   48.23    4.96
   4  -2  -7   12.18    1.18
  -4  -2   7   11.07    1.20
   4  -2  -7   11.22    1.30
  -4  -2   7   10.52    1.23
  -4   2   7   13.18    1.23
   4   2  -7   11.32    1.23
   3  -2  -7  134.67   13.18
  -3  -2   7  131.34   13.21
  -3  -2   7  139.16   13.17
   3  -2  -7  118.37   13.25
   3   2  -7  134.73   13.19
  -3   2   7  138.73   13.18
   2  -2  -7   19.12    2.16
  -2  -2   7   23.99    2.15
  -2  -2   7   19.01    2.07
   2   2  -7   21.36    2.10
  -2   2   7   21.05    2.08
  -1  -2   7   28.87    3.31
  -1   2   7   32.21    3.25
   1   2  -7   36.57    3.27
   0  -2  -7    7.39    0.93
   0  -2   7   10.65    0.96
   0   2  -7    8.34    0.88
   0   2   7    8.80    0.88
  -1  -2  -7  372.18   32.19
   1   2   7  304.80   32.13
  -1   2  -7  300.31   32.14
   2  -2   7    0.53    0.14
   2  -2   7    0.47    0.15
  -2  -2  -7    0.58    0.13
  -2  -2  -7    0.85    0.12
   2   2   7    0.56    0.12
  -2   2  -7    0.60    0.11
  -3  -2  -7   22.86    2.05
   3  -2   7   20.66    2.02
   3  -2   7   19.08    2.11
   3  -2   7   20.07    2.08
  -3  -2  -7   18.36    2.04
   3   2   7   19.26    2.06
  -3   2  -7   20.74    2.04
   4  -2   7   26.54    3.04
   4  -2   7   30.58    3.00
  -4  -2  -7   34.13    3.00
  -4  -2  -7   26.96    3.03
   4   2   7   28.54    3.05
  -4   2  -7   32.22    3.03
   5  -2   7    4.21    0.48
  -5  -2  -7    4.16    0.51
   5  -2   7    4.41    0.56
   5  -2   7    3.71    0.50
  -5   2  -7    4.97    0.51
   5   2   7    4.02    0.53
   6  -2   7    0.54    0.14
   6  -2   7    0.56    0.20
   6  -2   7    0.28    0.12
  -6  -2  -7    0.45    0.16
  -6   2  -7    0.65    0.18
   6   2   7    0.61    0.19
  -7  -2  -7   42.45    3.89
   7  -2   7   43.18    3.86
   7  -2   7   32.83    3.89
   7  -2   7   40.63    3.83
  -7   2  -7   33.73    3.86
   7   2   7   34.33    3.89
   8  -2   7    3.29    0.47
  -8  -2  -7    4.14    0.59
   8   2   7    4.23    0.64
  -8   2  -7    4.11    0.63
  -9  -2  -7   19.31    2.32
   9   2   7   22.06    2.38
  -9   2  -7   25.58    2.39
 -10  -2  -7    3.94    0.68
  10   2   7    6.88    0.89
 -10   2  -7    4.36    0.74
 -11  -2  -7    0.06    0.23
 -11   2  -7   -0.06    0.20
  11   2   7   -0.12    0.21
  11   3  -7    0.64    0.29
 -11   3   7    1.05    0.34
  10  -3  -7    1.17    0.39
 -10   3   7    0.84    0.26
  -9  -3   7   18.74    1.99
   9  -3  -7   15.64    2.08
   9   3  -7   20.13    2.04
  -9   3   7   20.09    2.03
  -8  -3   7    3.07    0.47
   8  -3  -7    3.16    0.61
  -8   3   7    2.75    0.50
   8   3  -7    3.07    0.53
  -7  -3   7   25.19    2.55
   7  -3  -7   25.03    2.71
  -7   3   7   25.02    2.58
   7   3  -7   24.01    2.59
   6  -3  -7    1.80    0.44
  -6  -3   7    2.18    0.32
  -6  -3   7    1.62    0.34
   6   3  -7    2.33    0.39
  -6   3   7    2.64    0.38
   5  -3  -7    0.33    0.20
  -5  -3   7    0.80    0.21
   5  -3  -7    0.69    0.16
  -5  -3   7    0.69    0.14
  -5   3   7    0.38    0.14
   5   3  -7    0.31    0.15
   4  -3  -7    3.81    0.47
  -4  -3   7    3.55    0.49
  -4  -3   7    3.95    0.42
   4  -3  -7    3.46    0.62
  -4   3   7    3.89    0.45
   4   3  -7    3.88    0.47
   3  -3  -7   14.64    1.78
  -3  -3   7   16.71    1.75
   3  -3  -7   18.42    1.72
  -3   3   7   15.28    1.66
   3   3  -7   16.89    1.69
  -2  -3   7   35.38    3.36
   2  -3  -7   33.59    3.39
   2  -3  -7   34.46    3.32
  -2   3   7   30.71    3.25
   2   3  -7   30.85    3.27
   1  -3  -7   59.51    6.06
  -1  -3   7   55.95    6.03
   1  -3  -7   54.66    6.00
   1   3  -7   65.38    5.95
  -1   3   7   62.15    5.92
   0  -3  -7    4.37    0.52
   0  -3  -7    4.45    0.55
   0  -3   7    4.56    0.55
   0   3  -7    4.11    0.44
   0   3   7    4.13    0.43
  -1  -3  -7    3.04    0.43
   1  -3   7    4.39    0.48
   1  -3   7    3.22    0.49
  -1   3  -7    3.13    0.34
   1   3   7    3.28    0.36
   2  -3   7    3.59    0.53
   2  -3   7    3.00    0.48
  -2  -3  -7    2.90    0.41
  -2   3  -7    3.45    0.35
   2   3   7    3.14    0.37
   3  -3   7   34.85    3.69
   3  -3   7   34.18    3.64
  -3  -3  -7   36.51    3.60
   3   3   7   35.09    3.59
  -3   3  -7   37.03    3.56
  -4  -3  -7    6.15    0.64
   4  -3   7    6.57    0.78
  -4  -3  -7    5.98    0.63
   4  -3   7    5.68    0.71
   4   3   7    6.68    0.69
  -4   3  -7    5.14    0.64
  -5  -3  -7   81.87    8.19
   5  -3   7   91.32    8.27
   5  -3   7   91.61    8.35
   5   3   7   81.31    8.24
  -5   3  -7   68.76    8.19
   6  -3   7   10.69    1.12
  -6  -3  -7    8.42    0.97
   6  -3   7    9.14    1.02
  -6   3  -7    8.95    0.99
   6   3   7    8.17    1.01
   7  -3   7   15.61    1.94
   7  -3   7   20.25    1.92
  -7  -3  -7   15.13    1.85
   7   3   7   19.52    1.93
  -7   3  -7   19.50    1.91
   8  -3   7    0.13    0.18
  -8  -3  -7    1.12    0.21
   8   3   7    0.84    0.24
  -8   3  -7    0.38    0.18
  -9  -3  -7   12.51    1.26
  -9   3  -7   10.03    1.27
   9   3   7   10.45    1.31
 -10   3  -7    3.55    0.63
  10   3   7    3.00    0.63
  10  -4  -7    7.06    1.10
  10   4  -7    6.01    0.94
   9  -4  -7    5.70    0.95
   9   4  -7    5.12    0.79
   8   4  -7    0.56    0.22
   7  -4  -7    0.70    0.33
  -7  -4   7    1.18    0.29
   7   4  -7    1.33    0.31
  -6  -4   7   10.85    1.28
   6  -4  -7   11.03    1.38
   6   4  -7   11.76    1.25
   5  -4  -7   38.19    3.85
  -5  -4   7   35.43    3.89
   5   4  -7   39.57    3.85
   4  -4  -7   17.94    2.10
  -4  -4   7   19.42    2.15
   4   4  -7   22.63    2.09
  -3  -4   7   30.31    3.41
   3  -4  -7   32.91    3.47
   3  -4  -7   31.17    3.37
   3   4  -7   36.33    3.33
   2  -4  -7    0.25    0.18
   2  -4  -7    0.01    0.10
  -2  -4   7   -0.08    0.10
   2   4  -7   -0.04    0.06
   1  -4  -7    2.72    0.47
  -1  -4   7    2.93    0.46
   1  -4  -7    2.02    0.38
   1   4  -7    2.02    0.26
   0  -4  -7   22.56    2.40
   0  -4   7   23.22    2.43
   1  -4   7   39.06    4.15
  -1  -4  -7   43.18    4.14
   1  -4   7   38.36    4.15
   1   4   7   40.75    4.02
   2  -4   7   11.31    1.25
   2  -4   7   10.95    1.23
  -2  -4  -7    9.82    1.18
   2   4   7   11.07    1.12
   3  -4   7   24.10    2.72
  -3  -4  -7   26.18    2.63
   3   4   7   25.90    2.60
   4  -4   7    0.41    0.19
   4  -4   7    0.46    0.21
   4   4   7    0.16    0.12
   5  -4   7    7.47    0.92
   5  -4   7    8.08    0.99
   5   4   7    7.34    0.87
   6  -4   7    0.01    0.16
   6  -4   7    0.09    0.14
   6   4   7    0.04    0.12
   7  -4   7   30.92    2.85
   7   4   7   22.13    2.71
   8  -4   7   10.30    1.43
  -8   4  -7   13.50    1.49
   8   4   7   13.53    1.43
   9   4   7    7.01    0.91
  -9   4  -7    6.88    0.93
  10   4   7    3.24    0.61
 -10   4  -7    3.37    0.61
   9  -5  -7   10.32    1.53
   9   5  -7   13.30    1.42
   8  -5  -7   13.43    1.78
   8   5  -7   15.30    1.64
   7  -5  -7   13.99    1.56
  -7  -5   7   11.98    1.36
   7   5  -7   10.24    1.30
  -6  -5   7    4.65    0.76
   6  -5  -7    5.89    0.96
   6   5  -7    4.89    0.72
   5  -5  -7    2.82    0.61
  -5  -5   7    2.05    0.45
   5  -5  -7    2.15    0.41
  -4  -5   7    5.90    0.73
   4  -5  -7    4.17    0.70
   4  -5  -7    6.01    0.92
   3  -5  -7   13.52    1.44
  -3  -5   7   12.74    1.36
   3  -5  -7    9.41    1.28
  -2  -5   7    5.95    0.86
   2  -5  -7    7.99    0.86
   2  -5  -7    6.40    0.89
  -1  -5   7   70.62    6.27
   1  -5  -7   52.10    6.21
   1  -5  -7   61.55    6.19
   0  -5  -7    5.05    0.70
   0  -5  -7    5.58    0.70
   0  -5   7    4.58    0.77
   1  -5   7    7.95    0.91
  -1  -5  -7    6.14    0.84
   1  -5   7    6.04    0.85
  -1  -5  -7    7.59    0.87
  -2  -5  -7    1.16    0.31
   2  -5   7    0.93    0.30
   2  -5   7    2.14    0.42
   3  -5   7   25.58    2.54
   3  -5   7   21.43    2.53
   4  -5   7   12.73    1.53
   4  -5   7   13.21    1.51
   5  -5   7   14.02    1.56
   5  -5   7   12.92    1.58
   6  -5   7    6.91    0.93
   6  -5   7    6.92    0.86
   6   5   7    5.35    0.94
   7  -5   7   -0.03    0.19
   7   5   7    0.30    0.21
   8  -5   7    3.92    0.72
  -7  -6   7    0.13    0.19
   7  -6  -7    0.45    0.34
  -6  -6   7    2.72    0.56
   6  -6  -7    3.39    0.71
   5  -6  -7    7.44    1.18
  -5  -6   7    6.96    1.09
   4  -6  -7   18.30    1.79
   4  -6  -7   14.74    1.88
  -4  -6   7   13.89    1.79
   3  -6  -7    7.22    1.00
  -3  -6   7    8.28    1.07
   3  -6  -7    9.98    1.18
   2  -6  -7   -0.02    0.21
   2  -6  -7    0.02    0.17
  -2  -6   7    0.23    0.22
   1  -6  -7    2.91    0.53
  -1  -6   7    3.65    0.61
   1  -6  -7    1.78    0.50
   0  -6  -7   26.06    2.95
   0  -6  -7   26.28    2.91
   0  -6   7   30.24    2.99
   1  -6   7    5.41    0.88
  -1  -6  -7    5.24    0.82
   2  -6   7   14.20    1.67
   2  -6   7   14.93    1.71
   3  -6   7    8.73    1.17
   3  -6   7    9.93    1.20
   4  -6   7    0.31    0.22
   4  -6   7    0.67    0.29
   5  -6   7    3.47    0.62
   5  -6   7    1.81    0.49
   6  -6   7    0.31    0.26
   6  -6   7    0.73    0.31
   7  -6   7    7.04    1.12
   4  -7  -7    1.01    0.35
  -4  -7   7    1.16    0.38
   4  -7  -7    0.39    0.38
   3  -7  -7    4.68    0.77
   3  -7  -7    4.58    0.89
  -3  -7   7    4.43    0.82
   2  -7  -7   11.03    1.37
   2  -7  -7   13.17    1.50
  -2  -7   7   10.30    1.40
   1  -7  -7    5.51    0.83
   1  -7  -7    5.14    0.88
  -1  -7   7    4.32    0.84
   0  -7  -7    2.46    0.57
   0  -7   7    3.99    0.72
   1  -7   7    1.61    0.47
   2  -7   7    0.88    0.38
   3  -7   7    2.21    0.55
   4  -7   7    4.20    0.78
  12   0  -8    1.90    0.47
 -12   0   8    3.22    0.58
 -11   0   8    0.47    0.23
  10   0  -8    0.08    0.17
 -10   0   8    0.19    0.19
   9   0  -8    0.83    0.21
  -9   0   8    0.10    0.14
   8   0  -8   57.81    5.91
  -8   0   8   68.05    5.95
   8   0  -8   51.40    5.90
  -7   0   8    0.25    0.13
   7   0  -8    0.13    0.11
   7   0  -8    0.04    0.09
   6   0  -8   82.45    7.87
   6   0  -8   82.96    7.89
  -6   0   8   71.00    7.87
   5   0  -8    0.08    0.08
  -5   0   8    0.05    0.08
   5   0  -8    0.00    0.06
  -4   0   8   85.35    7.60
   4   0  -8   70.98    7.58
  -4   0   8   69.30    7.53
   4   0  -8   80.81    7.60
   3   0  -8    0.08    0.05
   3   0  -8    0.08    0.06
  -3   0   8    0.00    0.05
   2   0  -8  142.95   16.69
  -2   0   8  195.49   16.71
  -1   0   8    0.04    0.04
   1   0  -8    0.00    0.03
   0   0  -8    9.40    1.07
   0   0   8   11.98    1.08
   1   0   8   -0.02    0.03
  -1   0  -8    0.04    0.04
   2   0   8   43.84    4.65
  -2   0  -8   49.27    4.64
  -3   0  -8    0.07    0.06
   3   0   8    0.02    0.06
  -4   0  -8   61.66    7.01
   4   0   8   79.76    7.04
   5   0   8    0.01    0.08
  -5   0  -8    0.21    0.10
  -6   0  -8   27.83    3.21
   6   0   8   35.48    3.24
   7   0   8    0.16    0.13
  -7   0  -8    0.31    0.14
   8   0   8    8.97    1.06
  -8   0  -8    9.48    1.07
   9   0   8    0.56    0.23
  -9   0  -8    0.76    0.22
 -10   0  -8   20.03    2.48
  10   0   8   26.32    2.50
  11   0   8   -0.14    0.19
 -11   0  -8    0.08    0.21
 -12  -1   8   13.27    1.41
  12   1  -8   12.16    1.41
 -12   1   8   10.38    1.43
 -11  -1   8    1.62    0.41
  11  -1  -8    1.67    0.35
  11   1  -8    1.88    0.41
 -11   1   8    1.49    0.40
 -10  -1   8   32.13    3.48
 -10   1   8   31.26    3.47
  10   1  -8   37.06    3.50
   9  -1  -8    0.51    0.17
  -9  -1   8    0.83    0.22
   9  -1  -8    0.08    0.14
  -9   1   8    0.24    0.16
   9   1  -8    0.19    0.16
  -8  -1   8    0.24    0.15
   8  -1  -8    0.32    0.14
   8  -1  -8    0.27    0.17
  -8   1   8    0.21    0.15
   8   1  -8   -0.08    0.10
   7  -1  -8    1.99    0.41
  -7  -1   8    2.12    0.38
   7  -1  -8    2.42    0.35
   7   1  -8    2.57    0.41
   7   1  -8    2.31    0.35
  -7   1   8    2.12    0.38
   6  -1  -8   10.92    1.30
  -6  -1   8   10.57    1.25
   6  -1  -8   11.74    1.23
   6   1  -8   12.50    1.23
  -6   1   8   14.08    1.28
   6   1  -8   10.36    1.25
   5  -1  -8    0.62    0.20
  -5  -1   8    0.83    0.15
  -5  -1   8    0.86    0.19
   5  -1  -8    0.64    0.15
   5   1  -8    0.87    0.19
   5   1  -8    0.81    0.16
  -5   1   8    0.72    0.18
   4  -1  -8  122.35   10.61
   4  -1  -8   96.83   10.52
  -4  -1   8   99.80   10.55
  -4  -1   8  107.76   10.53
  -4   1   8  114.91   10.56
   4   1  -8   97.39   10.55
   3  -1  -8    6.90    0.63
  -3  -1   8    5.33    0.64
  -3  -1   8    6.24    0.65
   3  -1  -8    5.61    0.69
  -3   1   8    6.19    0.65
   3   1  -8    5.61    0.65
  -2  -1   8    5.77    0.63
   2  -1  -8    5.74    0.62
  -2  -1   8    6.50    0.65
   2  -1  -8    6.23    0.68
  -2   1   8    6.05    0.64
   2   1  -8    5.99    0.64
   1  -1  -8   13.45    1.49
   1  -1  -8   14.18    1.54
  -1   1   8   16.83    1.51
   1   1  -8   15.29    1.50
   0  -1  -8  117.64   12.64
   0  -1   8  134.82   12.64
   0   1   8  126.58   12.64
   0   1  -8  132.41   12.64
   1  -1   8    0.06    0.04
  -1   1  -8    0.05    0.04
   1   1   8    0.04    0.05
  -2  -1  -8   57.55    5.68
   2  -1   8   57.69    5.67
   2   1   8   55.22    5.68
  -2   1  -8   57.70    5.67
  -3  -1  -8   13.75    1.26
   3  -1   8   12.39    1.25
  -3   1  -8   10.52    1.23
   3   1   8   11.88    1.26
  -4  -1  -8    2.40    0.36
   4  -1   8    2.13    0.33
   4   1   8    2.70    0.33
  -5  -1  -8    5.63    0.68
   5  -1   8    6.94    0.69
  -5   1  -8    5.38    0.67
   5   1   8    5.90    0.69
  -6  -1  -8   57.12    6.23
   6  -1   8   67.55    6.23
  -6   1  -8   66.47    6.24
   6   1   8   56.99    6.23
  -7  -1  -8    0.13    0.14
   7  -1   8   -0.14    0.08
  -7   1  -8    0.02    0.12
   7   1   8    0.07    0.12
   8  -1   8   36.98    3.87
  -8  -1  -8   38.38    3.89
   8   1   8   36.95    3.89
  -8   1  -8   38.92    3.89
   9  -1   8    1.66    0.37
  -9   1  -8    2.63    0.48
   9   1   8    2.32    0.45
  10  -1   8    2.40    0.45
 -10  -1  -8    2.06    0.48
 -10   1  -8    1.57    0.43
  10   1   8    2.20    0.49
  11  -1   8    0.95    0.30
 -11  -1  -8    1.15    0.32
  11   1   8    0.81    0.26
 -11   1  -8    0.86    0.34
 -11   2   8    3.89    0.62
 -10  -2   8    0.16    0.18
  10  -2  -8    0.02    0.19
 -10   2   8    0.03    0.17
  10   2  -8    1.54    0.33
  -9  -2   8    2.77    0.45
   9  -2  -8    1.80    0.46
  -9   2   8    2.44    0.46
   9   2  -8    3.06    0.51
  -8  -2   8   31.91    3.33
   8  -2  -8   35.51    3.29
   8   2  -8   31.73    3.35
  -8   2   8   29.87    3.33
   7  -2  -8    6.55    0.98
   7  -2  -8    8.24    0.88
  -7  -2   8   10.60    0.96
  -7   2   8    7.98    0.93
   7   2  -8    7.90    0.94
  -6  -2   8   73.80    6.31
   6  -2  -8   64.78    6.25
   6  -2  -8   62.79    6.39
  -6  -2   8   60.49    6.28
   6   2  -8   58.12    6.31
  -6   2   8   56.92    6.29
   5  -2  -8    0.02    0.04
  -5  -2   8    0.06    0.08
  -5  -2   8    0.11    0.09
   5  -2  -8    0.06    0.12
  -5   2   8    0.06    0.08
   5   2  -8    0.01    0.09
   4  -2  -8   11.28    1.33
  -4  -2   8   12.32    1.27
   4  -2  -8   12.33    1.20
  -4  -2   8   12.25    1.24
   4   2  -8   11.90    1.26
  -4   2   8   10.84    1.24
   3  -2  -8    0.14    0.13
   3  -2  -8    0.26    0.04
  -3  -2   8    0.23    0.10
  -3  -2   8    0.11    0.07
   3   2  -8    0.13    0.08
  -3   2   8    0.16    0.07
   2  -2  -8  119.52   13.42
  -2  -2   8  146.28   13.35
  -2  -2   8  129.86   13.40
  -2   2   8  134.31   13.35
   2   2  -8  143.36   13.37
   1  -2  -8    7.01    0.84
  -1  -2   8    7.81    0.75
  -1  -2   8    7.52    0.75
  -1  -2   8    7.20    0.82
   1   2  -8    6.92    0.77
  -1   2   8    7.89    0.77
   0  -2   8   28.50    2.77
   0  -2  -8   31.58    2.79
   0   2  -8   25.71    2.70
   0   2   8   24.56    2.70
  -1  -2  -8    0.45    0.12
  -1  -2  -8    0.26    0.05
   1  -2   8    0.27    0.11
  -1  -2  -8    0.26    0.04
   1   2   8    0.32    0.08
  -1   2  -8    0.30    0.06
  -2  -2  -8   16.77    1.60
  -2  -2  -8   17.59    1.58
   2  -2   8   15.11    1.62
   2  -2   8   14.95    1.54
   2   2   8   15.80    1.59
  -2   2  -8   13.77    1.57
   3  -2   8    8.32    0.78
  -3  -2  -8    7.07    0.80
   3  -2   8    7.59    0.84
  -3  -2  -8    7.72    0.81
  -3   2  -8    7.78    0.80
   3   2   8    6.97    0.82
   4  -2   8  271.04   25.26
  -4  -2  -8  248.44   25.28
  -4  -2  -8  250.20   25.25
   4   2   8  237.81   25.30
  -4   2  -8  269.93   25.28
   5  -2   8   14.90    1.62
  -5  -2  -8   15.50    1.63
  -5  -2  -8   18.13    1.67
   5  -2   8   18.79    1.73
   5   2   8   13.17    1.66
   6  -2   8   25.90    2.50
   6  -2   8   26.53    2.52
  -6  -2  -8   27.46    2.54
  -6   2  -8   21.03    2.51
   6   2   8   21.45    2.53
   7  -2   8    0.59    0.17
  -7  -2  -8    1.16    0.23
   7  -2   8    0.56    0.16
   7   2   8    0.68    0.22
  -7   2  -8    0.94    0.23
  -8  -2  -8    7.79    0.91
   8  -2   8    6.94    0.85
  -8   2  -8    8.47    0.92
   8   2   8    7.65    0.94
  -9  -2  -8    1.97    0.37
  -9   2  -8    1.56    0.38
   9   2   8    2.49    0.43
 -10  -2  -8   11.46    1.29
  10   2   8   12.45    1.37
 -10   2  -8   10.17    1.33
 -11  -2  -8    0.73    0.31
 -11   2  -8    1.55    0.43
  11   2   8    1.14    0.40
 -11   3   8    3.19    0.65
  11   3  -8    2.69    0.58
  10  -3  -8   23.53    2.52
  10   3  -8   26.45    2.45
 -10   3   8   18.49    2.37
   9  -3  -8    0.48    0.28
  -9   3   8    0.65    0.22
  -8  -3   8   -0.07    0.09
   8  -3  -8    0.05    0.18
   8   3  -8   -0.07    0.13
  -8   3   8    0.02    0.11
   7  -3  -8    6.67    0.91
  -7  -3   8    7.29    0.80
  -7  -3   8    6.37    0.76
  -7   3   8    7.80    0.82
   7   3  -8    5.86    0.80
   6  -3  -8   26.04    2.89
  -6  -3   8   24.02    2.78
  -6  -3   8   26.38    2.74
   6   3  -8   31.62    2.81
  -6   3   8   27.29    2.77
   5  -3  -8    3.51    0.64
  -5  -3   8    3.91    0.43
  -5  -3   8    3.26    0.53
   5   3  -8    3.32    0.46
  -5   3   8    3.81    0.46
   4  -3  -8   35.50    3.74
  -4  -3   8   37.47    3.57
  -4  -3   8   35.99    3.67
   4  -3  -8   34.80    3.62
   4   3  -8   34.38    3.62
  -4   3   8   36.16    3.60
   3  -3  -8    0.09    0.09
   3  -3  -8    0.12    0.14
  -3  -3   8   -0.10    0.07
   3   3  -8    0.11    0.08
  -3   3   8    0.07    0.06
   2  -3  -8    0.31    0.11
  -2  -3   8    0.12    0.11
   2  -3  -8    0.15    0.13
   2   3  -8    0.14    0.07
  -2   3   8    0.08    0.05
  -1  -3   8    2.91    0.44
   1  -3  -8    2.75    0.35
   1  -3  -8    2.58    0.44
  -1   3   8    2.32    0.27
   1   3  -8    2.48    0.29
   0  -3  -8   78.83    7.98
   0  -3   8   75.47    7.97
   0   3  -8   81.82    7.87
   0   3   8   81.00    7.87
   1  -3   8    7.21    0.78
  -1  -3  -8    7.83    0.78
  -1   3  -8    5.98    0.67
   1   3   8    6.41    0.68
  -2  -3  -8  119.09   11.19
   2  -3   8   96.41   11.21
   2  -3   8  105.66   11.21
  -2   3  -8  111.57   11.11
   2   3   8  127.45   11.14
   3  -3   8   17.36    1.91
  -3  -3  -8   18.80    1.87
   3   3   8   16.42    1.85
  -3   3  -8   19.30    1.83
   4  -3   8    4.79    0.61
   4  -3   8    4.15    0.55
  -4  -3  -8    4.14    0.47
  -4  -3  -8    4.15    0.49
  -4   3  -8    4.63    0.49
   4   3   8    4.43    0.53
   5  -3   8    0.56    0.23
  -5  -3  -8    1.18    0.19
   5  -3   8    1.33    0.28
   5   3   8    1.18    0.25
  -5   3  -8    1.07    0.22
   6  -3   8   19.33    2.22
  -6  -3  -8   19.40    2.11
   6  -3   8   20.77    2.18
  -6   3  -8   19.90    2.14
   6   3   8   24.21    2.19
  -7  -3  -8    5.09    0.68
   7  -3   8    5.23    0.77
   7  -3   8    7.14    0.75
  -7   3  -8    6.68    0.74
   7   3   8    5.96    0.75
  -8  -3  -8   19.11    2.22
   8   3   8   22.42    2.31
  -8   3  -8   23.47    2.29
  -9  -3  -8    0.47    0.20
  -9   3  -8    0.37    0.24
   9   3   8    0.47    0.25
 -10   3  -8    2.78    0.57
  10   3   8    2.62    0.54
  10  -4  -8    2.59    0.66
  10   4  -8    3.49    0.60
   9  -4  -8    5.75    0.97
   9   4  -8    4.84    0.78
   8  -4  -8   23.96    2.36
   8   4  -8   17.92    2.16
   7  -4  -8   19.52    2.10
  -7  -4   8   18.97    1.95
   7   4  -8   16.14    1.92
  -6  -4   8   19.39    2.12
   6  -4  -8   19.89    2.24
   6   4  -8   19.96    2.09
  -5  -4   8    2.70    0.50
   5  -4  -8    3.29    0.48
   5  -4  -8    3.23    0.61
   5   4  -8    3.19    0.47
   4  -4  -8   11.21    1.32
  -4  -4   8   10.84    1.23
   4  -4  -8   11.04    1.19
   4   4  -8   10.31    1.16
  -3  -4   8   22.39    2.48
   3  -4  -8   23.90    2.45
   3  -4  -8   23.56    2.55
   3   4  -8   23.74    2.39
   2  -4  -8   61.19    6.24
   2  -4  -8   61.35    6.16
   2   4  -8   60.66    6.08
   1  -4  -8    2.28    0.45
   1  -4  -8    2.34    0.38
  -1  -4   8    2.90    0.46
   1   4  -8    1.77    0.24
   0  -4  -8   16.47    1.71
   0  -4  -8   16.08    1.75
   0  -4   8   14.93    1.73
  -1  -4  -8    0.64    0.22
   1  -4   8    0.61    0.22
   1   4   8    0.64    0.12
  -2  -4  -8    3.22    0.48
   2  -4   8    4.20    0.62
   2  -4   8    3.37    0.57
   2   4   8    3.84    0.42
   3  -4   8    0.50    0.22
   3  -4   8    0.52    0.21
  -3  -4  -8    0.63    0.18
   3   4   8    0.55    0.14
   4  -4   8   28.18    2.81
   4  -4   8   23.31    2.73
   4   4   8   26.95    2.68
   5  -4   8   30.25    3.70
   5  -4   8   39.16    3.69
   5   4   8   36.86    3.64
   6  -4   8   11.77    1.35
   6  -4   8   13.07    1.43
   6   4   8   10.95    1.31
   7  -4   8    0.58    0.26
   7   4   8    0.83    0.26
   8  -4   8    3.63    0.68
   8   4   8    4.99    0.73
  -8   4  -8    3.88    0.63
  -9   4  -8    6.03    0.90
   9   4   8    6.32    0.97
  10   4   8   14.26    1.77
 -10   4  -8   15.77    1.77
   9   5  -8    2.36    0.51
   8  -5  -8    0.33    0.35
   8   5  -8    0.99    0.28
   7  -5  -8   18.72    2.20
  -7  -5   8   18.05    2.05
   7   5  -8   19.01    2.01
   6  -5  -8   15.89    2.13
  -6  -5   8   18.89    2.04
   6   5  -8   20.19    2.00
   5  -5  -8    9.88    1.35
  -5  -5   8   11.88    1.29
   5  -5  -8   10.57    1.22
   4  -5  -8   25.80    2.37
   4  -5  -8   21.15    2.47
  -4  -5   8   19.10    2.38
  -3  -5   8   10.06    1.20
   3  -5  -8    9.82    1.26
   3  -5  -8   10.15    1.16
   2  -5  -8    2.11    0.43
  -2  -5   8    2.71    0.53
   2  -5  -8    2.87    0.56
   1  -5  -8    0.43    0.23
   1  -5  -8    0.03    0.14
  -1  -5   8    0.20    0.18
   0  -5   8   22.60    2.68
   0  -5  -8   28.01    2.72
   0  -5  -8   25.05    2.66
  -1  -5  -8   13.11    1.50
   1  -5   8   13.28    1.51
  -2  -5  -8   25.55    2.49
   2  -5   8   21.16    2.50
   2  -5   8   23.21    2.52
   3  -5   8   11.93    1.37
   3  -5   8   11.37    1.38
   4  -5   8   -0.13    0.15
   4  -5   8    0.22    0.18
   5  -5   8    0.14    0.22
   5  -5   8    0.43    0.21
   6  -5   8   11.60    1.48
   6  -5   8   11.75    1.44
   6   5   8   13.87    1.50
   7  -5   8    6.19    0.99
   7   5   8    6.93    1.01
   8   5   8    6.88    0.91
   7  -6  -8    2.11    0.61
  -7  -6   8    2.36    0.51
  -6  -6   8    3.40    0.63
   6  -6  -8    2.67    0.68
   5  -6  -8    1.28    0.46
  -5  -6   8    0.59    0.30
   4  -6  -8    3.01    0.68
  -4  -6   8    3.31    0.61
   4  -6  -8    2.64    0.52
   3  -6  -8   21.80    2.53
   3  -6  -8   21.57    2.42
  -3  -6   8   23.96    2.49
   2  -6  -8    5.26    0.91
  -2  -6   8    4.77    0.85
   2  -6  -8    6.43    0.78
   1  -6  -8   25.78    2.85
   1  -6  -8   26.42    2.80
   0  -6  -8    2.78    0.58
   0  -6   8    2.81    0.59
  -1  -6  -8    4.94    0.81
   1  -6   8    5.72    0.89
   2  -6   8    2.85    0.59
   3  -6   8    2.34    0.52
   4  -6   8   18.11    2.15
   4  -6   8   20.46    2.19
   5  -6   8   20.70    2.32
   6  -6   8    5.36    0.92
   6  -6   8    6.55    0.96
   4  -7  -8    3.03    0.76
  -4  -7   8    4.33    0.75
   3  -7  -8    2.10    0.63
  -2  -7   8    0.50    0.27
   2  -7  -8    0.32    0.29
   1  -7  -8    1.28    0.44
  -1  -7   8    0.65    0.34
   0  -7   8    6.53    1.05
   0  -7  -8    6.25    1.04
   1  -7   8    6.40    1.03
   2  -7   8   11.11    1.41
   3  -7   8    9.46    1.25
   4  -7   8    0.95    0.37
  12   0  -9    0.18    0.19
 -12   0   9    0.06    0.18
 -11   0   9   19.26    2.14
  11   0  -9   19.92    2.11
  10   0  -9    1.21    0.26
 -10   0   9    0.24    0.19
   9   0  -9    6.46    0.83
  -9   0   9    7.57    0.86
  -8   0   9    0.08    0.13
   8   0  -9    0.44    0.17
   8   0  -9    0.27    0.14
   7   0  -9   58.82    5.46
   7   0  -9   53.86    5.48
  -7   0   9   49.86    5.46
   6   0  -9   -0.02    0.08
  -6   0   9    0.02    0.08
   6   0  -9   -0.02    0.08
   5   0  -9   77.58    8.05
   5   0  -9   71.37    8.06
  -5   0   9   94.44    8.08
   4   0  -9    0.00    0.05
  -4   0   9   -0.01    0.02
   4   0  -9   -0.06    0.05
  -4   0   9   -0.03    0.06
  -3   0   9   17.02    1.56
   3   0  -9   13.50    1.53
  -2   0   9    0.03    0.04
   2   0  -9    0.03    0.04
  -1   0   9   64.62    6.18
   1   0  -9   59.96    6.17
   0   0  -9    0.04    0.04
   0   0   9    0.05    0.05
  -1   0  -9  174.79   16.73
   1   0   9  163.64   16.74
   2   0   9    0.07    0.06
  -2   0  -9   -0.01    0.04
   3   0   9   52.08    5.21
  -4   0  -9   -0.02    0.06
   4   0   9    0.19    0.10
   5   0   9   12.14    1.29
  -5   0  -9   12.06    1.29
  -6   0  -9   -0.03    0.09
   6   0   9    0.11    0.11
   7   0   9   21.20    2.35
  -7   0  -9   23.70    2.36
  -8   0  -9    0.12    0.14
   8   0   9    0.10    0.14
   9   0   9   24.08    2.79
  -9   0  -9   29.21    2.82
 -10   0  -9    0.34    0.20
  10   0   9    0.85    0.26
 -11   0  -9    2.40    0.50
  11   0   9    1.93    0.46
 -12   1   9    2.07    0.45
  12   1  -9    1.26    0.38
  11  -1  -9    0.39    0.18
 -11  -1   9    0.09    0.17
 -11   1   9    0.31    0.25
  11   1  -9    0.45    0.24
 -10  -1   9    0.22    0.19
 -10   1   9    1.63    0.32
   9  -1  -9    8.60    1.16
   9  -1  -9   10.93    1.11
  -9  -1   9    9.37    1.14
  -9   1   9   11.87    1.17
   9   1  -9    9.18    1.13
   8  -1  -9    2.13    0.42
   8  -1  -9    2.27    0.34
  -8  -1   9    1.61    0.35
  -8   1   9    1.30    0.33
   8   1  -9    2.32    0.39
   7  -1  -9   40.19    3.81
  -7  -1   9   41.08    3.85
   7  -1  -9   36.29    3.87
   7   1  -9   33.90    3.80
  -7   1   9   41.62    3.85
   7   1  -9   33.67    3.83
  -6  -1   9    0.82    0.20
   6  -1  -9    0.84    0.18
   6  -1  -9    0.54    0.20
  -6   1   9    0.91    0.21
   6   1  -9    1.01    0.19
   6   1  -9    1.04    0.23
   5  -1  -9    0.08    0.07
  -5  -1   9    0.03    0.07
  -5  -1   9    0.01    0.05
   5  -1  -9   -0.05    0.07
   5   1  -9    0.00    0.05
   5   1  -9    0.01    0.07
  -5   1   9    0.00    0.07
   4  -1  -9   35.76    3.80
   4  -1  -9   34.29    3.73
  -4  -1   9   41.83    3.74
  -4  -1   9   35.41    3.75
  -4   1   9   39.35    3.76
  -3  -1   9  241.42   24.54
   3  -1  -9  264.22   24.53
   3  -1  -9  222.99   24.58
  -3  -1   9  274.15   24.55
   3   1  -9  213.47   24.54
  -3   1   9  272.90   24.55
   2  -1  -9    6.58    0.79
  -2  -1   9    7.28    0.76
  -2  -1   9    7.98    0.76
   2  -1  -9    6.15    0.74
  -2   1   9    7.56    0.76
   2   1  -9    7.89    0.76
  -1  -1   9  209.59   20.07
   1  -1  -9  185.32   20.10
   1  -1  -9  198.18   20.06
  -1   1   9  223.81   20.07
   1   1  -9  198.00   20.06
   0  -1   9    2.84    0.28
   0  -1  -9    2.67    0.27
   0   1   9    2.12    0.27
   0   1  -9    2.02    0.26
  -1  -1  -9    3.41    0.37
   1  -1   9    3.97    0.38
   1   1   9    3.05    0.37
  -1   1  -9    3.05    0.36
  -2  -1  -9    0.07    0.05
   2  -1   9    0.12    0.06
   2   1   9    0.05    0.06
  -2   1  -9    0.09    0.05
   3  -1   9  121.98   10.79
  -3  -1  -9  108.93   10.78
   3   1   9  100.36   10.79
  -3   1  -9  103.41   10.77
   4  -1   9   16.84    1.70
  -4  -1  -9   19.69    1.72
  -4   1  -9   14.17    1.69
   4   1   9   15.66    1.71
   5  -1   9   52.10    5.29
   5   1   9   48.11    5.29
  -5   1  -9   57.65    5.29
  -6  -1  -9    3.95    0.53
   6  -1   9    4.43    0.53
   6   1   9    4.28    0.54
  -6   1  -9    4.09    0.53
  -7  -1  -9    4.15    0.59
   7  -1   9    4.21    0.57
   7   1   9    5.50    0.62
  -7   1  -9    4.77    0.59
   8  -1   9    1.65    0.31
   8   1   9    1.91    0.36
  -8   1  -9    1.46    0.31
   9  -1   9   10.67    1.23
  -9  -1  -9   13.38    1.29
  -9   1  -9    9.58    1.26
   9   1   9   10.28    1.28
 -10  -1  -9    0.44    0.25
  10  -1   9    0.22    0.19
  10   1   9    0.38    0.26
 -10   1  -9    0.21    0.20
  11  -1   9   23.43    2.72
 -11  -1  -9   29.33    2.78
 -11   1  -9   22.33    2.77
  11   1   9   27.71    2.78
 -11  -2   9   25.04    2.63
 -11   2   9   22.60    2.63
  11   2  -9   25.77    2.64
  10  -2  -9    1.28    0.42
 -10  -2   9    1.37    0.35
 -10   2   9    2.42    0.42
  10   2  -9    2.69    0.45
   9  -2  -9   11.71    1.31
  -9  -2   9   10.32    1.20
   9   2  -9   10.25    1.23
  -9   2   9   10.51    1.22
   8  -2  -9    3.07    0.56
  -8  -2   9    3.16    0.48
   8  -2  -9    2.89    0.37
   8   2  -9    2.03    0.44
  -8   2   9    2.70    0.46
  -7  -2   9   32.45    3.29
   7  -2  -9   35.63    3.24
   7  -2  -9   31.08    3.39
  -7   2   9   28.55    3.28
   7   2  -9   32.09    3.31
  -6  -2   9    6.18    0.64
   6  -2  -9    6.71    0.76
   6  -2  -9    4.98    0.59
  -6  -2   9    4.92    0.63
  -6   2   9    4.97    0.64
   6   2  -9    5.71    0.66
   6   2  -9    5.82    0.66
  -5  -2   9   73.63    6.53
  -5  -2   9   69.31    6.51
   5  -2  -9   63.07    6.61
   5  -2  -9   61.20    6.46
   5   2  -9   58.15    6.51
  -5   2   9   65.78    6.51
  -4  -2   9    1.06    0.22
   4  -2  -9    1.15    0.29
   4  -2  -9    1.10    0.15
  -4  -2   9    1.09    0.19
  -4   2   9    1.49    0.23
   4   2  -9    1.13    0.21
   3  -2  -9    0.72    0.21
  -3  -2   9    0.49    0.11
   3  -2  -9    0.50    0.07
  -3  -2   9    0.38    0.13
   3   2  -9    0.27    0.10
  -3   2   9    0.14    0.08
  -2  -2   9   -0.08    0.05
   2  -2  -9    0.02    0.09
  -2  -2   9    0.14    0.05
  -2   2   9    0.04    0.05
   2   2  -9    0.05    0.05
  -1  -2   9   66.59    6.89
  -1  -2   9   67.72    6.82
   1  -2  -9   66.94    6.91
   1   2  -9   74.35    6.84
  -1   2   9   68.53    6.83
   0  -2  -9    2.46    0.34
   0  -2   9    2.41    0.25
   0  -2   9    2.31    0.32
   0   2   9    2.67    0.28
   0   2  -9    2.50    0.28
  -1  -2  -9  175.09   18.39
  -1  -2  -9  199.77   18.34
   1   2   9  184.10   18.36
  -1   2  -9  183.26   18.35
   2  -2   9    2.60    0.29
  -2  -2  -9    2.92    0.31
  -2  -2  -9    2.81    0.34
   2  -2   9    2.24    0.34
   2   2   9    2.75    0.33
  -2   2  -9    2.96    0.31
   3  -2   9   41.18    4.07
  -3  -2  -9   46.46    4.10
  -3  -2  -9   39.55    4.09
  -3   2  -9   40.46    4.08
   3   2   9   36.42    4.10
   4  -2   9    5.04    0.54
  -4  -2  -9    4.90    0.57
  -4  -2  -9    5.15    0.54
   4   2   9    5.14    0.59
  -4   2  -9    4.61    0.56
  -5  -2  -9    7.81    0.82
  -5  -2  -9    7.62    0.86
   5  -2   9    7.78    0.84
   5   2   9    8.21    0.90
   6  -2   9    4.86    0.58
  -6  -2  -9    5.80    0.63
  -6   2  -9    5.53    0.62
   6   2   9    4.14    0.62
   7  -2   9   24.86    2.28
  -7  -2  -9   19.05    2.27
   7  -2   9   20.42    2.24
  -7   2  -9   19.64    2.28
   7   2   9   26.28    2.34
   8  -2   9    7.37    0.92
  -8  -2  -9    9.55    0.99
   8   2   9    9.34    1.02
  -8   2  -9    7.55    0.97
  -9  -2  -9   16.98    1.94
   9   2   9   20.66    1.99
  -9   2  -9   16.26    1.95
 -10  -2  -9    0.84    0.25
 -10   2  -9    0.63    0.25
  10   2   9    0.25    0.21
 -11  -2  -9    3.48    0.62
  11   2   9    2.72    0.66
 -11   2  -9    3.81    0.66
 -11   3   9    0.88    0.28
  11   3  -9    0.08    0.19
  10   3  -9    2.45    0.51
 -10   3   9    3.16    0.53
  -9  -3   9   18.76    1.92
   9  -3  -9   16.81    2.06
  -9   3   9   18.42    1.95
   9   3  -9   17.60    1.96
   8  -3  -9    0.86    0.32
  -8  -3   9    0.95    0.23
   8   3  -9    0.97    0.29
  -8   3   9    1.22    0.28
  -7  -3   9   20.60    2.46
  -7  -3   9   22.34    2.50
   7  -3  -9   29.61    2.69
   7   3  -9   27.26    2.54
  -7   3   9   24.35    2.51
  -6  -3   9    8.79    0.93
   6  -3  -9    7.45    1.01
  -6  -3   9    8.35    0.87
   6   3  -9    7.38    0.91
  -6   3   9    7.47    0.89
  -5  -3   9    2.00    0.27
  -5  -3   9    2.40    0.39
   5  -3  -9    2.20    0.47
   5   3  -9    1.98    0.35
  -5   3   9    2.01    0.33
  -4  -3   9    1.19    0.19
  -4  -3   9    1.19    0.27
   4  -3  -9    1.33    0.33
  -4   3   9    1.46    0.24
   4   3  -9    1.26    0.25
  -3  -3   9   74.42    7.06
  -3  -3   9   68.66    6.93
   3  -3  -9   64.60    7.10
  -3   3   9   69.79    6.97
   3   3  -9   73.33    7.00
   2  -3  -9    5.69    0.70
  -2  -3   9    6.20    0.66
   2   3  -9    5.19    0.58
  -2   3   9    4.84    0.55
   1  -3  -9  117.18   10.83
  -1  -3   9  113.15   10.80
  -1   3   9  100.68   10.68
   1   3  -9  103.55   10.70
   0  -3  -9   39.93    4.14
   0  -3   9   38.42    4.13
   0   3   9   41.55    4.03
   0   3  -9   41.60    4.04
  -1  -3  -9   12.03    1.31
   1  -3   9   13.41    1.34
  -1   3  -9   12.08    1.22
   1   3   9   11.46    1.23
  -2  -3  -9    5.28    0.59
   2  -3   9    5.10    0.62
  -2   3  -9    4.49    0.52
   2   3   9    5.00    0.54
   3  -3   9   52.82    5.81
  -3  -3  -9   63.98    5.79
  -3   3  -9   51.67    5.73
   3   3   9   62.59    5.77
   4  -3   9    7.88    0.98
   4  -3   9   11.51    1.07
  -4  -3  -9    8.25    0.90
  -4  -3  -9    8.50    0.93
  -4   3  -9    7.79    0.92
   4   3   9   10.21    0.97
  -5  -3  -9   30.05    3.25
   5  -3   9   37.26    3.39
   5  -3   9   34.67    3.33
  -5   3  -9   33.39    3.27
   5   3   9   27.60    3.29
   6  -3   9    0.23    0.16
  -6  -3  -9    0.65    0.16
   6  -3   9    0.65    0.22
   6   3   9    0.71    0.21
  -6   3  -9    0.50    0.17
   7  -3   9   14.59    1.33
  -7  -3  -9    9.77    1.24
  -7   3  -9   10.92    1.28
   7   3   9   12.37    1.32
  -8  -3  -9    2.40    0.42
  -8   3  -9    2.45    0.47
   8   3   9    3.73    0.58
  -9  -3  -9   10.46    1.25
   9   3   9   13.18    1.34
  -9   3  -9    9.48    1.25
 -10   3  -9    6.50    0.87
  10   3   9    6.97    0.91
  10  -4  -9    5.16    0.92
  10   4  -9    4.52    0.76
 -10   4   9    4.37    0.85
   9  -4  -9    3.35    0.76
   9   4  -9    5.32    0.74
   8   4  -9    0.28    0.20
  -7  -4   9    9.11    1.08
   7  -4  -9    9.11    1.22
   7   4  -9    9.56    1.08
  -6  -4   9    2.15    0.45
   6  -4  -9    3.46    0.65
   6   4  -9    2.88    0.46
  -5  -4   9   52.38    5.90
   5  -4  -9   57.03    6.01
   5   4  -9   64.39    5.87
   4  -4  -9    3.68    0.49
  -4  -4   9    4.66    0.63
   4  -4  -9    3.89    0.69
   4   4  -9    3.27    0.46
  -3  -4   9    7.85    1.00
   3  -4  -9    8.01    1.06
   3  -4  -9    9.75    0.98
   3   4  -9    8.32    0.92
   2  -4  -9    5.64    0.82
   2  -4  -9    5.90    0.75
  -2  -4   9    6.93    0.80
   2   4  -9    6.60    0.69
   1  -4  -9    4.38    0.71
  -1  -4   9    4.77    0.64
   1   4  -9    4.84    0.52
   0  -4  -9    4.21    0.52
   0  -4   9    3.27    0.53
   0   4  -9    2.83    0.35
  -1  -4  -9   39.93    4.25
   1   4   9   42.69    4.14
   2  -4   9   21.54    2.34
  -2  -4  -9   20.76    2.30
   2   4   9   23.05    2.23
  -3  -4  -9   28.79    3.06
   3  -4   9   30.32    3.12
   3  -4   9   30.66    3.14
   3   4   9   29.75    3.02
   4  -4   9    0.57    0.23
   4  -4   9    0.36    0.21
   4   4   9    0.68    0.18
   5  -4   9    7.62    1.00
   5  -4   9    8.34    0.96
   5   4   9    7.87    0.92
   6  -4   9    7.34    0.93
   6  -4   9    7.44    0.97
   6   4   9    7.97    0.91
   7  -4   9   14.77    1.55
   7   4   9   11.47    1.44
  -7   4  -9   13.18    1.46
   8   4   9    3.51    0.65
  -8   4  -9    3.23    0.57
  -9   4  -9    2.04    0.48
   9   4   9    2.62    0.55
   9  -5  -9    9.00    1.32
   9   5  -9    7.51    0.99
   8  -5  -9    4.30    0.89
   8   5  -9    5.04    0.75
   7  -5  -9   10.16    1.37
  -7  -5   9   10.01    1.22
   7   5  -9   10.92    1.21
  -6  -5   9    9.19    1.15
   6  -5  -9   11.33    1.31
   6   5  -9    8.70    1.07
   5  -5  -9    0.52    0.29
  -5  -5   9    0.97    0.29
  -4  -5   9    0.80    0.29
   4  -5  -9    0.57    0.30
   4  -5  -9    0.72    0.24
  -3  -5   9   22.19    2.48
   3  -5  -9   25.48    2.45
   3  -5  -9   20.89    2.53
  -2  -5   9   28.42    2.61
   2  -5  -9   19.77    2.48
   2  -5  -9   24.66    2.60
   1  -5  -9   37.68    4.06
  -1  -5   9   42.46    4.13
   1  -5  -9   38.46    4.12
   0  -5  -9   23.54    2.57
   0  -5   9   24.26    2.58
  -1  -5  -9    1.88    0.42
   1  -5   9    1.89    0.42
  -2  -5  -9    5.26    0.73
   2  -5   9    6.30    0.80
   3  -5   9   12.54    1.46
   4  -5   9   15.05    1.51
   4  -5   9   10.44    1.43
   5  -5   9   17.12    1.73
   5  -5   9   12.54    1.64
   6  -5   9    4.61    0.73
   6  -5   9    4.20    0.68
   6   5   9    3.02    0.60
   7   5   9    0.23    0.19
   8   5   9    2.08    0.50
  -7  -6   9    1.49    0.41
   7  -6  -9    1.24    0.51
  -6  -6   9   18.90    2.10
   6  -6  -9   17.99    2.21
   5  -6  -9    5.16    0.96
  -5  -6   9    5.50    0.87
  -4  -6   9    7.43    0.95
   4  -6  -9    6.20    1.09
   3  -6  -9    3.58    0.72
  -2  -6   9    0.25    0.22
   2  -6  -9   -0.02    0.21
  -1  -6   9    1.28    0.39
   1  -6  -9    1.91    0.47
   0  -6  -9    2.60    0.58
   0  -6   9    3.32    0.64
   1  -6   9   23.71    2.69
  -1  -6  -9   24.96    2.66
   2  -6   9   22.78    2.53
   3  -6   9    2.54    0.54
   4  -6   9    0.13    0.20
   5  -6   9    6.35    0.97
   6  -6   9   10.59    1.34
  -4  -7   9    0.33    0.26
   4  -7  -9    0.66    0.40
   3  -7  -9    7.72    1.35
  -3  -7   9   11.29    1.30
  -2  -7   9   13.76    1.67
   2  -7  -9   12.95    1.66
   1  -7  -9    9.03    1.20
  -1  -7   9    8.60    1.30
   0  -7  -9    4.69    0.81
   0  -7   9    4.25    0.80
   1  -7   9    0.45    0.29
   2  -7   9    5.94    1.01
   3  -7   9    0.91    0.39
   4  -7   9    9.78    1.33
  12   0 -10    0.22    0.22
 -12   0  10    0.04    0.24
 -11   0  10    0.04    0.18
  11   0 -10    1.08    0.30
 -10   0  10   30.97    3.03
  10   0 -10   26.75    2.97
  -9   0  10    0.02    0.13
   9   0 -10   -0.08    0.11
   8   0 -10   80.62    8.43
   8   0 -10   97.90    8.47
  -8   0  10   74.36    8.44
   7   0 -10    0.05    0.10
   7   0 -10   -0.01    0.09
  -7   0  10    0.14    0.12
  -6   0  10    0.30    0.14
   6   0 -10    0.30    0.13
   6   0 -10    0.18    0.12
   5   0 -10    0.06    0.08
   5   0 -10    0.15    0.08
  -5   0  10    0.18    0.10
  -4   0  10   10.58    1.05
   4   0 -10   10.63    1.03
   4   0 -10   10.63    1.06
  -4   0  10    8.46    0.98
   3   0 -10   -0.01    0.04
  -3   0  10   -0.05    0.05
   2   0 -10  153.40   14.99
  -2   0  10  149.66   15.00
  -1   0  10   -0.03    0.03
   1   0 -10    0.00    0.03
   0   0 -10  105.74   10.00
   0   0  10   96.21   10.01
  -1   0 -10    0.02    0.04
   1   0  10    0.00    0.05
   2   0  10   46.94    5.28
  -2   0 -10   59.19    5.29
   3   0  10    0.03    0.06
  -3   0 -10    0.08    0.06
  -4   0 -10  173.54   17.93
   4   0  10  188.55   17.95
   5   0  10    0.03    0.08
  -5   0 -10    0.13    0.10
   6   0  10   29.58    2.75
  -6   0 -10   23.79    2.72
  -7   0 -10    0.12    0.13
   7   0  10    0.73    0.20
   8   0  10    9.17    1.06
  -8   0 -10    9.11    1.06
   9   0  10    0.11    0.16
  -9   0 -10    0.56    0.20
 -10   0 -10   33.63    3.12
  10   0  10   25.32    3.07
 -11   0 -10    0.06    0.18
  11   0  10    0.10    0.20
  11  -1 -10    0.88    0.28
 -11  -1  10    1.08    0.32
 -11   1  10    1.06    0.34
  11   1 -10    1.25    0.35
  10  -1 -10   14.67    1.57
 -10  -1  10   14.01    1.62
 -10   1  10   14.15    1.62
  10   1 -10   15.06    1.62
   9  -1 -10    2.83    0.58
   9  -1 -10    5.33    0.54
  -9   1  10    3.60    0.60
   9   1 -10    3.45    0.58
  -8  -1  10    3.38    0.53
   8  -1 -10    3.25    0.42
   8  -1 -10    3.16    0.55
  -8   1  10    3.40    0.53
   8   1 -10    2.89    0.50
  -7  -1  10    0.68    0.21
   7  -1 -10    0.21    0.12
   7  -1 -10    0.63    0.22
   7   1 -10    0.56    0.19
   7   1 -10    0.48    0.16
  -7   1  10    0.73    0.22
  -6  -1  10  131.51   12.14
   6  -1 -10  121.71   12.25
  -6  -1  10  116.99   12.19
   6  -1 -10  117.41   12.16
  -6   1  10  135.72   12.21
   6   1 -10  119.25   12.18
   6   1 -10  115.02   12.19
  -5  -1  10    0.01    0.06
  -5  -1  10    0.31    0.12
   5  -1 -10    0.22    0.08
   5  -1 -10    0.24    0.13
   5   1 -10    0.08    0.07
   5   1 -10    0.02    0.07
  -5   1  10    0.12    0.10
  -4  -1  10   53.57    5.76
   4  -1 -10   56.71    5.81
  -4  -1  10   55.55    5.74
   4  -1 -10   65.35    5.75
   4   1 -10   56.89    5.76
   3  -1 -10    1.70    0.29
  -3  -1  10    1.86    0.24
   3  -1 -10    1.18    0.18
  -3  -1  10    1.33    0.22
   3   1 -10    1.75    0.25
  -3   1  10    1.61    0.24
  -2  -1  10    9.16    1.09
  -2  -1  10   12.31    1.10
   2  -1 -10   11.40    1.08
   2  -1 -10    9.61    1.13
  -2   1  10   11.93    1.10
   2   1 -10    9.14    1.08
   1  -1 -10    2.14    0.25
  -1  -1  10    2.49    0.27
  -1   1  10    1.97    0.26
   1   1 -10    2.45    0.26
   0  -1 -10   83.60    8.00
   0  -1  10   77.46    8.01
   0   1 -10   81.19    8.00
   1  -1  10   59.90    5.30
  -1  -1 -10   52.48    5.29
  -1   1 -10   51.55    5.29
   1   1  10   49.22    5.30
  -2  -1 -10   57.97    5.93
   2  -1  10   59.92    5.93
  -2   1 -10   60.88    5.93
  -3  -1 -10    1.60    0.25
   3  -1  10    1.32    0.23
  -3   1 -10    1.86    0.22
   3   1  10    1.17    0.24
   4  -1  10   59.70    6.16
  -4  -1 -10   54.93    6.15
  -4   1 -10   69.36    6.17
   4   1  10   62.88    6.18
   5  -1  10    3.26    0.41
  -5  -1 -10    3.06    0.41
   5   1  10    2.97    0.47
  -5   1 -10    3.20    0.41
  -6  -1 -10   70.47    7.26
   6  -1  10   69.11    7.25
   6   1  10   81.21    7.29
  -6   1 -10   69.44    7.25
   7  -1  10    1.06    0.28
  -7  -1 -10    1.62    0.32
  -7   1 -10    1.24    0.28
   7   1  10    1.37    0.31
   8  -1  10   43.36    5.04
  -8  -1 -10   49.20    5.07
   8   1  10   49.27    5.09
  -8   1 -10   58.83    5.11
   9  -1  10    0.29    0.18
  -9  -1 -10    0.51    0.21
  -9   1 -10    0.06    0.14
   9   1  10    0.79    0.26
  10  -1  10    2.87    0.56
 -10  -1 -10    2.75    0.57
  10   1  10    2.94    0.59
 -10   1 -10    3.24    0.58
 -11  -1 -10    1.20    0.37
  11  -1  10    1.69    0.38
  11   1  10    2.46    0.45
 -11   1 -10    1.01    0.36
 -11   2  10    0.21    0.21
 -10  -2  10    8.36    0.99
  10  -2 -10    7.18    1.05
 -10   2  10    8.71    1.01
  10   2 -10    8.48    1.00
   9  -2 -10    1.85    0.44
  -9  -2  10    2.27    0.39
   9   2 -10    1.67    0.36
  -9   2  10    1.21    0.34
   8  -2 -10   36.17    3.70
  -8  -2  10   34.81    3.75
   8  -2 -10   43.90    3.90
   8   2 -10   33.49    3.77
  -8   2  10   36.96    3.77
  -7  -2  10    0.28    0.15
   7  -2 -10    0.49    0.12
   7  -2 -10    0.26    0.17
  -7   2  10    0.40    0.16
   7   2 -10    0.22    0.15
  -6  -2  10    9.03    0.89
   6  -2 -10    7.95    0.98
   6  -2 -10    7.25    0.84
  -6  -2  10    7.37    0.88
  -6   2  10    9.00    0.91
   6   2 -10    7.83    0.90
   6   2 -10    7.85    0.86
  -5  -2  10    1.03    0.23
  -5  -2  10    1.22    0.23
   5  -2 -10    1.00    0.29
   5  -2 -10    1.24    0.18
  -5   2  10    1.30    0.24
   5   2 -10    1.12    0.24
   4  -2 -10   60.69    6.19
   4  -2 -10   70.34    6.34
  -4  -2  10   63.51    6.22
  -4  -2  10   66.81    6.26
   4   2 -10   58.65    6.24
  -4   2  10   56.48    6.22
  -3  -2  10   14.08    1.43
   3  -2 -10   14.05    1.40
  -3  -2  10   13.89    1.47
   3  -2 -10   13.01    1.51
   3   2 -10   14.64    1.45
  -3   2  10   13.63    1.43
  -2  -2  10   98.03    9.99
   2  -2 -10   98.87   10.08
  -2  -2  10   94.51   10.04
   2  -2 -10  103.33    9.97
   2  -2 -10  104.39    9.97
   2   2 -10  107.04   10.01
  -2   2  10   99.28   10.00
  -1  -2  10   10.60    1.02
  -1  -2  10    8.79    1.07
  -1   2  10   10.23    1.03
   1   2 -10    9.90    1.03
   0  -2 -10   26.99    2.80
   0  -2 -10   27.02    2.80
   0  -2  10   28.37    2.81
   0  -2 -10   34.02    2.91
   0   2  10   26.40    2.83
   0   2 -10   28.82    2.82
  -1  -2 -10   19.51    2.16
   1  -2  10   20.36    2.17
   1  -2  10   21.63    2.10
  -1  -2 -10   20.79    2.11
   1   2  10   22.58    2.13
  -1   2 -10   21.26    2.12
  -2  -2 -10   10.58    1.17
  -2  -2 -10   13.03    1.21
   2  -2  10   11.43    1.16
  -2   2 -10   11.32    1.17
   2   2  10   11.09    1.19
  -3  -2 -10   28.08    2.95
   3  -2  10   30.73    2.93
  -3  -2 -10   28.19    2.95
   3   2  10   32.97    2.97
  -3   2 -10   26.89    2.94
  -4  -2 -10   18.21    1.77
   4  -2  10   16.86    1.77
  -4  -2 -10   16.00    1.78
   4   2  10   15.69    1.80
  -4   2 -10   19.80    1.79
  -5  -2 -10    3.39    0.38
   5  -2  10    2.48    0.33
  -5  -2 -10    2.50    0.31
   5   2  10    2.75    0.43
  -5   2 -10    2.75    0.40
   6  -2  10    5.57    0.63
  -6  -2 -10    6.35    0.68
   6   2  10    6.43    0.70
  -6   2 -10    4.37    0.64
   7  -2  10    4.68    0.60
  -7  -2 -10    5.48    0.66
  -7   2 -10    5.48    0.65
   7   2  10    5.19    0.67
   8  -2  10   12.88    1.35
  -8  -2 -10   11.68    1.38
   8   2  10   12.32    1.42
  -8   2 -10   12.80    1.40
  -9  -2 -10    2.24    0.40
   9   2  10    1.33    0.36
  -9   2 -10    1.25    0.34
 -10  -2 -10   15.32    1.82
 -10   2 -10   18.14    1.87
  10   2  10   16.24    1.91
 -11  -2 -10    0.14    0.22
 -11   2 -10    0.31    0.22
  11   2  10    0.27    0.29
  11   3 -10    1.70    0.44
 -11   3  10    2.15    0.46
  10  -3 -10   12.02    1.48
  10   3 -10   11.73    1.39
 -10   3  10   12.10    1.38
  -9  -3  10    5.76    0.72
   9  -3 -10    5.00    0.90
   9   3 -10    6.41    0.77
  -9   3  10    5.45    0.74
   8  -3 -10    0.34    0.25
   8   3 -10    0.54    0.21
  -8   3  10    0.45    0.20
   7  -3 -10    1.63    0.42
  -7  -3  10    1.13    0.28
  -7  -3  10    0.81    0.20
  -7   3  10    1.11    0.26
   7   3 -10    0.88    0.26
   6  -3 -10   27.69    2.98
  -6  -3  10   26.75    2.80
  -6  -3  10   27.07    2.85
  -6   3  10   29.47    2.84
   6   3 -10   27.06    2.85
  -5  -3  10   24.95    2.49
   5  -3 -10   24.88    2.65
  -5  -3  10   24.00    2.55
   5   3 -10   22.76    2.52
  -5   3  10   26.02    2.52
  -4  -3  10   25.67    2.90
   4  -3 -10   27.20    2.98
  -4  -3  10   28.61    2.82
  -4   3  10   27.44    2.84
   4   3 -10   31.15    2.88
  -3  -3  10    5.13    0.66
  -3  -3  10    5.49    0.56
   3  -3 -10    6.03    0.74
   3   3 -10    5.06    0.61
  -3   3  10    5.70    0.60
  -2  -3  10    0.06    0.09
   2  -3 -10   -0.08    0.09
   2   3 -10   -0.01    0.06
  -2   3  10    0.01    0.04
  -1  -3  10   23.57    2.58
   1  -3 -10   23.55    2.61
  -1   3  10   25.65    2.50
   1   3 -10   25.94    2.51
   0  -3  10   35.96    3.91
   0   3 -10   39.60    3.82
   0   3  10   38.69    3.82
  -1  -3 -10    0.05    0.09
   1  -3  10    0.06    0.10
   1   3  10    0.10    0.06
  -1   3 -10    0.05    0.04
  -2  -3 -10   30.76    3.34
   2  -3  10   31.19    3.37
  -2   3 -10   31.84    3.28
   2   3  10   37.21    3.31
  -3  -3 -10    2.79    0.35
  -3  -3 -10    2.37    0.26
   3  -3  10    2.28    0.40
  -3   3 -10    2.49    0.30
   3   3  10    2.38    0.36
   4  -3  10    4.97    0.67
  -4  -3 -10    5.41    0.62
  -4  -3 -10    5.93    0.60
   4   3  10    5.26    0.64
  -4   3 -10    5.37    0.61
   5  -3  10    0.88    0.25
  -5  -3 -10    1.47    0.23
   5   3  10    1.42    0.29
  -5   3 -10    1.36    0.25
  -6  -3 -10   48.80    4.79
   6  -3  10   51.47    4.85
   6   3  10   41.94    4.83
  -6   3 -10   48.06    4.81
  -7  -3 -10   19.76    2.18
   7  -3  10   22.94    2.25
  -7   3 -10   22.11    2.23
   7   3  10   19.79    2.25
  -8  -3 -10   27.85    2.83
  -8   3 -10   27.92    2.88
   8   3  10   26.04    2.90
  -9   3 -10    0.78    0.32
   9   3  10    1.50    0.39
 -10   3 -10    2.00    0.49
  10   3  10    2.03    0.52
  10  -4 -10    4.23    0.82
  10   4 -10    3.28    0.63
 -10   4  10    3.87    0.77
   9  -4 -10    4.27    0.83
   9   4 -10    4.26    0.69
   8  -4 -10   24.65    2.40
   8   4 -10   18.01    2.17
   7  -4 -10    6.03    0.93
  -7  -4  10    4.07    0.67
   7   4 -10    4.96    0.64
  -6  -4  10    1.88    0.40
   6  -4 -10    1.85    0.49
   6   4 -10    2.19    0.39
   5  -4 -10    1.50    0.39
  -5  -4  10    0.98    0.27
   5   4 -10    0.70    0.21
   4  -4 -10   22.99    2.69
  -4  -4  10   27.15    2.64
   4   4 -10   24.17    2.54
   3  -4 -10   13.44    1.60
  -3  -4  10   14.36    1.55
   3   4 -10   13.84    1.45
   2  -4 -10   53.43    5.66
  -2  -4  10   50.36    5.60
   2   4 -10   60.22    5.51
   1  -4 -10   14.53    1.60
  -1  -4  10   13.34    1.57
   1   4 -10   14.39    1.45
   0  -4 -10   26.69    2.84
   0  -4  10   32.85    2.87
   0   4 -10   24.35    2.69
  -1  -4 -10    1.13    0.27
   1  -4  10    1.23    0.31
   1   4  10    1.23    0.20
   2  -4  10   10.93    1.12
  -2  -4 -10    8.02    1.04
   2   4  10    9.39    0.98
   3  -4  10   21.87    2.43
  -3  -4 -10   21.59    2.38
   3   4  10   24.80    2.35
   4  -4  10   39.48    3.93
   4   4  10   36.61    3.85
   5  -4  10    4.05    0.64
   5   4  10    4.16    0.55
   6  -4  10    3.66    0.56
   6   4  10    2.82    0.52
   7  -4  10    0.69    0.24
   7   4  10    0.38    0.19
  -7   4 -10    0.24    0.16
  -8   4 -10    4.02    0.64
   8   4  10    3.99    0.68
  -9   4 -10    2.76    0.55
   9   4  10    2.77    0.58
   9  -5 -10    1.24    0.51
   8   5 -10    1.39    0.36
   7  -5 -10    2.21    0.58
  -7  -5  10    2.16    0.47
   7   5 -10    2.48    0.45
   6  -5 -10   37.46    4.28
  -6  -5  10   41.26    4.18
   6   5 -10   40.98    4.11
   5  -5 -10   11.63    1.52
  -5  -5  10   12.77    1.43
  -4  -5  10   20.74    2.39
   4  -5 -10   23.56    2.50
  -3  -5  10    2.50    0.52
   3  -5 -10    2.90    0.59
   2  -5 -10    2.82    0.58
  -2  -5  10    3.07    0.58
   1  -5 -10   16.36    1.71
  -1  -5  10   13.02    1.64
   0  -5  10    9.46    1.20
   0  -5 -10   10.82    1.23
  -1  -5 -10   19.54    2.21
   1  -5  10   21.48    2.25
   2  -5  10   14.44    1.57
  -2  -5 -10   12.77    1.50
   3  -5  10    3.68    0.65
   4  -5  10   -0.03    0.14
   5  -5  10    0.41    0.23
   6  -5  10   14.76    1.67
   6   5  10   14.40    1.67
   7   5  10    9.88    1.20
   8   5  10    9.36    1.20
   7  -6 -10    4.23    0.90
  -7  -6  10    4.48    0.76
   6  -6 -10    6.20    1.05
  -6  -6  10    4.97    0.84
   5  -6 -10    0.89    0.39
  -5  -6  10    0.12    0.21
  -4  -6  10    4.17    0.76
   4  -6 -10    5.23    0.89
   3  -6 -10   15.61    1.97
  -3  -6  10   18.16    1.95
  -2  -6  10   17.57    1.77
   2  -6 -10   12.54    1.71
  -1  -6  10   13.43    1.62
   1  -6 -10   13.51    1.61
   0  -6 -10    1.61    0.46
   0  -6  10    1.82    0.46
   1  -6  10    4.21    0.78
  -1  -6 -10    5.05    0.78
   2  -6  10    8.15    1.08
   3  -6  10   23.13    2.55
   4  -6  10   15.02    1.77
   5  -6  10    3.85    0.73
   6  -6  10    5.72    0.91
  -4  -7  10    6.32    1.04
   4  -7 -10    6.81    1.13
  -3  -7  10    1.63    0.48
   3  -7 -10    1.97    0.60
  -2  -7  10    1.58    0.51
   2  -7 -10    2.44    0.60
  -1  -7  10    8.57    1.22
   1  -7 -10    6.80    1.17
   0  -7  10    8.72    1.17
   0  -7 -10    5.48    0.99
   1  -7  10   10.50    1.36
   2  -7  10    8.47    1.28
   3  -7  10    4.55    0.87
 -12   0  11   -0.14    0.18
  12   0 -11    0.10    0.18
 -11   0  11   16.74    1.81
  11   0 -11   15.54    1.76
 -10   0  11    3.07    0.51
   9   0 -11    5.98    0.69
  -9   0  11    5.08    0.70
  -8   0  11    0.59    0.19
   8   0 -11    0.11    0.13
   8   0 -11    0.54    0.16
   7   0 -11    5.22    0.68
   7   0 -11    6.00    0.73
  -7   0  11    6.82    0.73
   6   0 -11    0.02    0.08
  -6   0  11   -0.04    0.09
   6   0 -11    0.02    0.07
  -5   0  11   76.34    8.27
   5   0 -11   84.21    8.29
   5   0 -11   92.17    8.27
  -5   0  11   79.69    8.20
  -4   0  11    0.00    0.03
   4   0 -11   -0.03    0.05
   4   0 -11    0.07    0.06
  -4   0  11   -0.04    0.06
   3   0 -11   58.78    5.55
  -3   0  11   52.53    5.55
   2   0 -11    0.00    0.04
  -2   0  11    0.01    0.05
   1   0 -11   14.87    1.54
  -1   0  11   15.58    1.55
   0   0  11    0.09    0.06
   0   0 -11    0.10    0.05
  -1   0 -11  224.78   19.84
   1   0  11  176.44   19.83
   2   0  11    0.04    0.06
  -2   0 -11    0.21    0.07
   3   0  11   11.70    1.28
  -3   0 -11   12.66    1.27
   4   0  11    0.20    0.10
  -4   0 -11    0.13    0.09
  -5   0 -11   34.89    3.96
   5   0  11   44.02    3.99
   6   0  11    0.05    0.10
  -6   0 -11    0.03    0.09
   7   0  11  121.44   10.41
  -7   0 -11   87.56   10.36
  -8   0 -11    0.02    0.11
   8   0  11    0.19    0.16
  -9   0 -11    3.97    0.65
   9   0  11    3.97    0.66
  10   0  11    0.71    0.27
 -10   0 -11    1.05    0.30
 -11   0 -11   11.42    1.30
  11   0  11    9.66    1.28
  11  -1 -11    1.85    0.36
 -11  -1  11    1.06    0.37
  11   1 -11    2.23    0.44
 -11   1  11    1.03    0.35
  10  -1 -11    1.92    0.34
 -10  -1  11    2.78    0.44
  10   1 -11    1.27    0.34
 -10   1  11    1.02    0.32
  -9  -1  11   40.08    4.12
   9  -1 -11   42.99    4.09
   9  -1 -11   41.69    4.17
   9   1 -11   32.77    4.09
  -9   1  11   43.79    4.14
   8  -1 -11    3.51    0.49
   8  -1 -11    4.53    0.59
  -8  -1  11    4.16    0.62
   8   1 -11    4.30    0.61
  -8   1  11    3.98    0.60
  -7  -1  11   12.77    1.54
   7  -1 -11   17.65    1.64
   7  -1 -11   12.81    1.50
  -7   1  11   16.31    1.57
   7   1 -11   14.69    1.55
   7   1 -11   13.92    1.52
  -6  -1  11    0.63    0.14
  -6  -1  11    0.79    0.20
   6  -1 -11    1.24    0.28
   6  -1 -11    0.88    0.18
   6   1 -11    0.77    0.18
   6   1 -11    0.91    0.21
  -6   1  11    0.65    0.19
   5  -1 -11    6.88    0.84
   5  -1 -11    6.93    0.76
  -5  -1  11    7.77    0.77
  -5  -1  11    7.17    0.80
   5   1 -11    7.09    0.79
  -5   1  11    6.59    0.79
  -4  -1  11    0.13    0.09
   4  -1 -11    0.08    0.10
   4  -1 -11    0.11    0.06
  -4  -1  11    0.06    0.06
  -4   1  11    0.02    0.07
   4   1 -11   -0.03    0.06
   3  -1 -11  150.32   12.66
   3  -1 -11  115.15   12.71
  -3  -1  11  136.56   12.67
   3   1 -11  112.98   12.66
  -3   1  11  123.38   12.67
   2  -1 -11    1.26    0.23
   2  -1 -11    1.14    0.17
  -2  -1  11    1.27    0.19
   2   1 -11    0.93    0.17
  -2   1  11    0.98    0.18
  -1  -1  11  155.61   16.94
   1  -1 -11  150.66   16.93
   1   1 -11  187.91   16.95
  -1   1  11  191.69   16.95
   0  -1 -11   10.73    1.06
   0  -1  11    9.03    1.06
   0   1  11   10.53    1.07
   0   1 -11   10.92    1.06
  -1  -1 -11    1.54    0.19
   1  -1  11    1.24    0.20
   1   1  11    1.36    0.22
  -1   1 -11    1.39    0.20
  -2  -1 -11    2.83    0.30
   2  -1  11    1.94    0.29
  -2   1 -11    2.53    0.29
   2   1  11    2.41    0.30
   3  -1  11  248.10   25.21
  -3  -1 -11  216.71   25.20
   3   1  11  265.27   25.22
  -3   1 -11  289.57   25.21
  -4  -1 -11   16.86    1.71
   4  -1  11   15.48    1.70
  -4   1 -11   17.03    1.70
  -5  -1 -11   37.01    3.20
   5  -1  11   27.05    3.16
  -5   1 -11   25.42    3.16
   5   1  11   37.54    3.22
   6  -1  11    1.66    0.32
  -6  -1 -11    1.89    0.34
   6   1  11    1.68    0.34
  -6   1 -11    1.92    0.33
   7  -1  11   11.49    1.24
  -7  -1 -11    9.13    1.23
   7   1  11   13.65    1.29
  -7   1 -11   11.12    1.24
  -8  -1 -11    0.70    0.20
   8  -1  11    0.20    0.15
   8   1  11    0.18    0.16
  -8   1 -11    0.52    0.19
  -9  -1 -11   10.70    1.38
   9  -1  11   11.44    1.34
  -9   1 -11   11.15    1.36
   9   1  11   15.33    1.43
  10  -1  11    0.56    0.26
 -10  -1 -11    1.07    0.35
 -10   1 -11    1.39    0.38
  10   1  11    0.87    0.32
  11  -1  11   11.25    1.27
 -11  -1 -11   10.84    1.22
  11   1  11    8.36    1.20
 -11   1 -11    8.84    1.21
 -11  -2  11   12.90    1.42
 -11   2  11   11.31    1.41
  11   2 -11   12.45    1.48
 -10  -2  11    0.43    0.21
  10  -2 -11    0.49    0.25
  10   2 -11    0.72    0.26
 -10   2  11    0.30    0.20
  -9  -2  11    3.69    0.54
   9  -2 -11    3.00    0.59
  -9   2  11    2.89    0.54
   9   2 -11    3.32    0.55
   8  -2 -11    0.29    0.12
   8  -2 -11   -0.04    0.15
   8   2 -11    0.21    0.16
  -8   2  11    0.55    0.20
   7  -2 -11   22.01    2.46
  -7  -2  11   20.72    2.35
   7  -2 -11   22.74    2.31
   7   2 -11   26.22    2.40
  -7   2  11   22.57    2.38
  -6  -2  11    2.99    0.42
   6  -2 -11    2.78    0.33
  -6  -2  11    2.48    0.39
   6  -2 -11    2.45    0.49
   6   2 -11    2.92    0.46
  -6   2  11    3.05    0.39
  -5  -2  11   67.49    6.88
   5  -2 -11   65.71    6.82
  -5  -2  11   70.41    6.86
   5  -2 -11   64.24    6.96
   5   2 -11   69.03    6.88
  -5   2  11   75.41    6.88
  -4  -2  11   12.32    1.09
  -4  -2  11    8.81    1.04
   4  -2 -11    8.23    1.11
   4  -2 -11   10.87    1.01
  -4   2  11    8.35    1.04
   4   2 -11   10.79    1.07
  -3  -2  11   12.09    1.24
   3  -2 -11   12.23    1.21
  -3  -2  11   12.22    1.28
   3  -2 -11   11.87    1.33
  -3   2  11   10.65    1.24
   3   2 -11   12.80    1.25
   2  -2 -11   30.62    3.00
   2  -2 -11   29.82    2.87
  -2  -2  11   25.20    2.89
  -2  -2  11   32.51    2.96
  -2   2  11   27.13    2.90
   2   2 -11   29.71    2.91
  -1  -2  11   12.25    1.35
  -1  -2  11   13.09    1.30
   1  -2 -11   11.37    1.37
   1  -2 -11   13.07    1.28
  -1   2  11   13.25    1.31
   1   2 -11   13.07    1.31
   0  -2  11   28.54    3.05
   0  -2 -11   29.90    3.04
   0  -2  11   35.14    3.12
   0  -2 -11   28.03    3.12
   0   2 -11   33.72    3.06
   0   2  11   29.19    3.06
  -1  -2 -11  113.16   11.61
   1  -2  11  125.39   11.62
   1  -2  11  116.98   11.55
  -1  -2 -11  113.65   11.55
  -1   2 -11  111.99   11.56
   1   2  11  120.18   11.57
   2  -2  11    2.72    0.31
  -2  -2 -11    2.61    0.32
  -2  -2 -11    2.45    0.34
  -2   2 -11    2.64    0.32
   2   2  11    3.30    0.35
  -3  -2 -11    9.85    0.96
   3  -2  11    9.61    0.94
  -3  -2 -11    8.70    0.95
   3   2  11    8.75    0.96
  -3   2 -11    7.89    0.94
   4  -2  11   27.05    2.78
  -4  -2 -11   28.86    2.81
  -4   2 -11   26.98    2.80
   5  -2  11   34.47    3.02
  -5  -2 -11   31.29    3.03
   5   2  11   25.25    3.04
  -5   2 -11   27.52    3.02
   6  -2  11    1.24    0.24
  -6  -2 -11    1.75    0.31
   6   2  11    1.25    0.30
  -6   2 -11    1.59    0.29
  -7  -2 -11   43.91    4.15
   7  -2  11   41.73    4.10
   7   2  11   43.41    4.17
  -7   2 -11   33.54    4.11
  -8  -2 -11    2.06    0.39
   8  -2  11    1.52    0.31
  -8   2 -11    1.76    0.37
   8   2  11    2.10    0.43
  -9  -2 -11   10.24    1.12
  -9   2 -11    9.48    1.12
   9   2  11    7.79    1.12
 -10  -2 -11    1.00    0.28
  10   2  11    1.46    0.37
 -10   2 -11    0.22    0.20
 -11  -2 -11    4.79    0.85
  11   2  11    5.93    0.98
 -11   2 -11    7.15    0.96
 -11   3  11    2.95    0.57
  11   3 -11    2.87    0.58
  10  -3 -11    5.24    0.84
  10   3 -11    4.18    0.71
 -10   3  11    4.33    0.72
   9  -3 -11   31.45    3.04
  -9  -3  11   25.83    2.84
  -9   3  11   26.72    2.86
   9   3 -11   26.39    2.87
   8  -3 -11   21.53    2.42
  -8  -3  11   20.54    2.25
   8   3 -11   24.07    2.32
  -8   3  11   20.73    2.28
   7  -3 -11    5.91    0.94
  -7  -3  11    6.15    0.69
  -7   3  11    6.10    0.72
   7   3 -11    5.41    0.72
  -6  -3  11    0.73    0.22
  -6  -3  11    0.59    0.17
   6  -3 -11    1.37    0.37
  -6   3  11    0.84    0.22
   6   3 -11    1.07    0.25
  -5  -3  11   -0.09    0.10
   5  -3 -11    0.28    0.17
  -5  -3  11    0.03    0.07
  -5   3  11    0.08    0.09
   5   3 -11    0.03    0.10
  -4  -3  11   10.23    1.08
   4  -3 -11   10.65    1.24
  -4  -3  11   12.16    1.18
  -4   3  11   10.62    1.11
   4   3 -11    9.29    1.11
   3  -3 -11   24.19    2.75
  -3  -3  11   26.88    2.59
  -3  -3  11   25.00    2.70
  -3   3  11   26.60    2.63
   3   3 -11   26.26    2.65
   2  -3 -11    8.22    1.03
  -2  -3  11    8.15    0.99
  -2   3  11    9.03    0.91
   2   3 -11    9.01    0.92
  -1  -3  11   52.62    5.65
   1  -3 -11   54.42    5.68
  -1   3  11   57.33    5.56
   1   3 -11   58.56    5.57
   0  -3 -11    3.25    0.50
   0  -3  11    3.53    0.45
   0   3  11    2.90    0.35
   0   3 -11    3.12    0.35
   1  -3  11    0.32    0.15
  -1  -3 -11    0.17    0.12
  -1   3 -11    0.24    0.07
   1   3  11    0.18    0.08
   2  -3  11    5.37    0.68
  -2  -3 -11    6.00    0.67
  -2   3 -11    5.44    0.60
   2   3  11    5.91    0.63
   3  -3  11   86.70    8.72
  -3  -3 -11   86.07    8.61
  -3  -3 -11   79.38    8.67
  -3   3 -11   87.72    8.63
   3   3  11   95.33    8.67
  -4  -3 -11    3.50    0.42
  -4  -3 -11    3.10    0.39
   4  -3  11    3.64    0.48
   4   3  11    3.60    0.45
  -4   3 -11    3.47    0.41
  -5  -3 -11   48.20    4.69
   5  -3  11   43.66    4.75
  -5   3 -11   48.43    4.71
   5   3  11   46.43    4.75
  -6  -3 -11   11.90    1.28
   6  -3  11   11.50    1.33
   6   3  11   12.63    1.35
  -7  -3 -11   10.30    1.12
   7  -3  11    8.90    1.15
   7   3  11   10.81    1.19
  -7   3 -11   11.00    1.16
  -8  -3 -11    0.47    0.16
   8   3  11    0.28    0.19
  -8   3 -11    0.40    0.19
  -9   3 -11   22.04    2.20
   9   3  11   18.03    2.21
 -10   3 -11    5.43    0.86
  10   3  11    4.96    0.89
  10  -4 -11    0.83    0.40
 -10   4  11    0.97    0.35
  10   4 -11    0.33    0.21
   9  -4 -11    0.84    0.38
   9   4 -11    1.39    0.39
   8  -4 -11    1.57    0.45
   8   4 -11    1.14    0.33
  -7  -4  11   13.20    1.36
   7  -4 -11   11.65    1.49
   7   4 -11   11.05    1.33
  -6  -4  11    6.25    0.76
   6  -4 -11    6.50    0.97
   6   4 -11    5.14    0.70
   5  -4 -11   21.04    2.59
  -5  -4  11   25.67    2.52
   5   4 -11   23.80    2.45
  -4  -4  11    3.50    0.60
   4  -4 -11    6.12    0.72
   4   4 -11    3.45    0.48
  -3  -4  11    3.07    0.55
   3  -4 -11    4.48    0.69
   3   4 -11    3.32    0.42
   2  -4 -11    1.60    0.39
  -2  -4  11    1.25    0.33
   2   4 -11    1.31    0.23
   1  -4 -11   20.66    2.06
  -1  -4  11   16.88    2.01
   1   4 -11   18.71    1.90
   0  -4 -11    3.60    0.59
   0  -4  11    2.79    0.54
   0   4  11    3.31    0.40
   0   4 -11    3.72    0.39
  -1  -4 -11   68.79    7.13
   1  -4  11   66.46    7.14
  -1   4 -11   72.53    7.00
   1   4  11   73.15    7.02
  -2  -4 -11    7.80    0.89
   2  -4  11    7.32    0.91
   2   4  11    7.41    0.82
  -3  -4 -11    1.97    0.36
   3  -4  11    2.57    0.45
   3   4  11    1.92    0.33
   4  -4  11    1.36    0.32
   4   4  11    1.06    0.25
   5  -4  11   19.92    1.90
  -5   4 -11   15.39    1.80
   5   4  11   17.03    1.83
   6  -4  11    5.48    0.89
   6   4  11    7.76    0.85
   7  -4  11   17.76    2.12
   7   4  11   17.81    2.11
  -7   4 -11   23.27    2.11
   8   4  11    5.36    0.85
  -8   4 -11    5.77    0.73
   9   4  11    3.80    0.64
  -9   4 -11    2.60    0.54
   8  -5 -11   11.85    1.36
   8   5 -11    8.05    1.09
   7  -5 -11   10.33    1.34
  -7  -5  11    9.55    1.18
   7   5 -11    9.42    1.12
  -6  -5  11    0.65    0.26
   6  -5 -11    0.92    0.35
   6   5 -11    0.25    0.17
   5  -5 -11    0.66    0.32
  -5  -5  11    0.62    0.27
  -4  -5  11   10.65    1.28
   4  -5 -11   10.79    1.36
  -3  -5  11   21.27    2.30
   3  -5 -11   20.50    2.34
   2  -5 -11   20.48    2.55
  -2  -5  11   27.05    2.58
  -1  -5  11   10.32    1.34
   1  -5 -11   12.97    1.41
   0  -5 -11    1.07    0.32
   0  -5  11    1.00    0.32
  -1  -5 -11    6.78    0.92
   1  -5  11    8.24    0.97
   2  -5  11    7.47    0.98
  -2  -5 -11    7.96    0.95
   3  -5  11   27.65    2.96
   4  -5  11   17.01    1.91
   5  -5  11    6.97    0.91
   6  -5  11    2.76    0.53
   6   5  11    2.12    0.45
   7   5  11    0.88    0.29
   8   5  11    0.22    0.22
  -7  -6  11    8.09    1.16
   7  -6 -11   11.16    1.39
   6  -6 -11   20.22    2.40
  -5  -6  11    9.69    1.32
   5  -6 -11   12.13    1.46
  -4  -6  11    5.76    0.97
   4  -6 -11    7.43    1.11
   3  -6 -11    3.85    0.76
  -3  -6  11    4.30    0.75
   2  -6 -11    2.00    0.52
  -2  -6  11    2.42    0.53
   1  -6 -11    5.98    0.94
  -1  -6  11    5.16    0.89
   0  -6 -11    9.13    1.23
   0  -6  11   11.33    1.30
  -1  -6 -11   22.76    2.63
   1  -6  11   26.49    2.71
   2  -6  11    3.56    0.68
   3  -6  11    2.13    0.49
   4  -6  11    0.16    0.23
   5  -6  11    3.77    0.68
   6  -6  11    1.86    0.48
   4  -7 -11    6.08    1.08
  -4  -7  11    6.82    1.06
   3  -7 -11    4.53    0.88
  -3  -7  11    4.28    0.80
   2  -7 -11    8.15    1.36
  -2  -7  11   11.43    1.34
  -1  -7  11    9.98    1.20
   1  -7 -11    7.10    1.20
   0  -7 -11    1.70    0.60
   0  -7  11    1.99    0.53
   1  -7  11    1.37    0.48
   2  -7  11    3.63    0.75
   3  -7  11    1.24    0.48
  10   0 -12   14.08    1.52
 -10   0  12   12.97    1.52
   9   0 -12    0.08    0.13
  -9   0  12    0.33    0.17
  -8   0  12   97.04    9.63
   8   0 -12   94.81    9.60
   8   0 -12   96.50    9.65
  -7   0  12    0.11    0.13
   7   0 -12   -0.04    0.10
   7   0 -12   -0.03    0.09
   6   0 -12   17.71    1.98
  -6   0  12   21.42    1.98
   6   0 -12   17.57    1.94
   5   0 -12    0.06    0.07
  -5   0  12    0.07    0.04
  -5   0  12    0.00    0.07
   5   0 -12    0.02    0.07
  -4   0  12   29.17    2.86
   4   0 -12   27.03    2.87
  -3   0  12    0.04    0.06
   3   0 -12    0.06    0.06
   2   0 -12    9.65    0.92
  -2   0  12    7.92    0.92
  -1   0  12    0.02    0.05
   1   0 -12    0.04    0.04
   0   0 -12    3.01    0.34
  -1   0 -12    0.11    0.06
   1   0  12    0.08    0.06
  -2   0 -12   53.92    5.50
   2   0  12   56.60    5.52
   3   0  12    0.02    0.06
  -3   0 -12    0.06    0.06
   4   0  12   78.09    6.94
  -4   0 -12   61.08    6.91
  -5   0 -12    0.14    0.09
   5   0  12    0.11    0.09
  -6   0 -12    5.18    0.63
   6   0  12    5.03    0.63
   7   0  12    0.59    0.19
  -7   0 -12    0.59    0.19
   8   0  12   39.22    3.64
  -8   0 -12   31.13    3.61
  -9   0 -12    0.00    0.13
   9   0  12    0.13    0.18
  10   0  12   25.53    2.46
 -10   0 -12   19.75    2.44
 -11   0 -12    0.02    0.20
  11   0  12    0.24    0.23
 -11  -1  12    0.43    0.23
  11  -1 -12    0.15    0.16
  11   1 -12    0.63    0.24
 -11   1  12    0.11    0.18
  10  -1 -12    2.82    0.53
 -10  -1  12    5.41    0.62
 -10   1  12    4.83    0.68
  10   1 -12    3.87    0.63
   9  -1 -12    0.39    0.21
  -9  -1  12    0.54    0.21
   9   1 -12    1.16    0.25
  -9   1  12    0.19    0.17
   8  -1 -12    0.65    0.23
  -8  -1  12    0.48    0.20
   8  -1 -12    0.47    0.16
   8   1 -12    0.59    0.20
  -8   1  12    0.64    0.23
   7  -1 -12    2.31    0.37
  -7  -1  12    2.79    0.43
   7  -1 -12    2.63    0.47
   7   1 -12    2.48    0.39
  -7   1  12    2.37    0.43
   7   1 -12    2.43    0.42
  -6  -1  12   70.75    7.33
  -6  -1  12   74.99    7.28
   6  -1 -12   65.03    7.37
   6  -1 -12   84.44    7.31
   6   1 -12   68.75    7.32
  -6   1  12   65.25    7.33
   6   1 -12   82.78    7.34
  -5  -1  12    1.05    0.22
  -5  -1  12    1.04    0.18
   5  -1 -12    0.89    0.18
   5  -1 -12    1.21    0.28
   5   1 -12    1.07    0.22
  -5   1  12    1.07    0.23
   4  -1 -12  118.10   12.76
  -4  -1  12  117.87   12.77
   4   1 -12  151.74   12.80
  -4   1  12  129.01   12.80
  -3  -1  12    0.68    0.16
  -3  -1  12    0.73    0.15
   3  -1 -12    0.65    0.19
   3  -1 -12    0.98    0.15
   3   1 -12    0.85    0.16
  -3   1  12    0.81    0.17
   2  -1 -12   21.95    1.93
  -2  -1  12   17.63    1.94
   2  -1 -12   17.13    1.98
   2   1 -12   19.25    1.94
  -2   1  12   19.13    1.94
  -1  -1  12    0.73    0.15
   1  -1 -12    0.87    0.14
   1   1 -12    0.95    0.15
  -1   1  12    0.80    0.15
   0  -1 -12  169.33   17.16
   0   1  12  173.38   17.17
   0   1 -12  177.69   17.16
   1  -1  12    8.63    0.93
  -1  -1 -12    9.74    0.93
  -1   1 -12    8.92    0.93
   1   1  12    8.26    0.93
   2  -1  12   28.05    2.92
  -2   1 -12   26.26    2.91
   2   1  12   33.24    2.94
  -3  -1 -12    4.10    0.54
   3  -1  12    5.35    0.56
  -3   1 -12    5.39    0.55
   3   1  12    4.56    0.56
   4  -1  12   21.94    2.22
  -4  -1 -12   20.35    2.22
   4   1  12   19.42    2.23
  -4   1 -12   24.82    2.23
   5  -1  12    3.69    0.52
  -5  -1 -12    4.96    0.54
   5   1  12    3.76    0.53
  -5   1 -12    4.89    0.53
  -6  -1 -12   31.67    3.46
   6  -1  12   30.98    3.45
   6   1  12   38.94    3.49
  -6   1 -12   34.40    3.46
   7  -1  12    1.03    0.27
  -7  -1 -12    1.12    0.28
   7   1  12    1.06    0.29
  -7   1 -12    1.25    0.30
   8  -1  12   15.11    1.54
  -8  -1 -12   14.86    1.55
   8   1  12   13.37    1.56
  -8   1 -12   12.49    1.53
  -9  -1 -12    0.31    0.21
   9  -1  12    0.45    0.21
  -9   1 -12    0.35    0.22
   9   1  12    0.24    0.20
 -10  -1 -12    2.38    0.47
  10  -1  12    1.39    0.37
  10   1  12    1.74    0.43
 -10   1 -12    1.62    0.44
  11  -1  12    0.70    0.30
 -11  -1 -12    1.01    0.32
 -11   1 -12    0.59    0.29
  11   1  12    1.20    0.37
  10  -2 -12   11.51    1.24
 -10  -2  12    8.00    1.10
  10   2 -12    9.18    1.13
 -10   2  12   10.34    1.15
  -9  -2  12    1.96    0.39
   9  -2 -12    3.00    0.56
   9   2 -12    2.29    0.43
  -9   2  12    1.75    0.41
  -8  -2  12   51.01    5.12
   8  -2 -12   48.41    5.23
   8  -2 -12   47.09    5.06
   8   2 -12   57.86    5.16
  -8   2  12   49.20    5.14
   7  -2 -12    1.62    0.24
  -7  -2  12    1.75    0.32
   7  -2 -12    0.92    0.32
   7   2 -12    1.63    0.32
  -7   2  12    1.62    0.33
   6  -2 -12    2.99    0.51
   6  -2 -12    1.96    0.28
  -6  -2  12    2.14    0.35
  -6  -2  12    2.36    0.36
  -6   2  12    2.42    0.39
   6   2 -12    2.80    0.40
   5  -2 -12    3.82    0.45
  -5  -2  12    4.06    0.51
   5  -2 -12    4.09    0.65
  -5  -2  12    5.43    0.51
   5   2 -12    4.01    0.51
  -5   2  12    3.70    0.50
   4  -2 -12   54.15    5.59
  -4  -2  12   56.24    5.50
   4  -2 -12   58.51    5.46
   4   2 -12   53.94    5.51
  -4   2  12   51.47    5.50
   3  -2 -12    2.11    0.25
  -3  -2  12    2.01    0.28
  -3  -2  12    2.61    0.32
   3  -2 -12    2.21    0.40
  -3   2  12    2.37    0.29
   3   2 -12    2.46    0.30
  -2  -2  12  177.99   19.30
  -2  -2  12  195.49   19.25
   2  -2 -12  187.19   19.34
   2  -2 -12  200.92   19.23
  -2   2  12  195.40   19.26
   2   2 -12  209.71   19.26
   1  -2 -12    2.02    0.36
  -1  -2  12    2.54    0.36
  -1  -2  12    2.27    0.26
  -1   2  12    2.06    0.27
   1   2 -12    2.25    0.27
   0  -2 -12    0.57    0.10
   0  -2  12    0.80    0.12
   0  -2  12    0.82    0.18
   0  -2 -12    0.66    0.18
   0   2  12    0.60    0.13
   0   2 -12    0.59    0.12
  -1  -2 -12    1.77    0.32
  -1  -2 -12    2.02    0.25
   1  -2  12    2.41    0.26
   1   2  12    2.17    0.27
  -1   2 -12    2.11    0.26
   2  -2  12   78.20    8.31
  -2  -2 -12   87.90    8.37
  -2  -2 -12   86.06    8.33
   2   2  12   79.57    8.34
  -2   2 -12   87.97    8.33
   3  -2  12    3.81    0.45
  -3  -2 -12    3.70    0.46
   3   2  12    3.82    0.48
  -3   2 -12    4.67    0.47
   4  -2  12   38.65    3.60
  -4  -2 -12   38.63    3.63
   4   2  12   33.12    3.64
  -4   2 -12   32.80    3.61
  -5  -2 -12   11.79    1.36
   5  -2  12   12.94    1.35
  -5   2 -12   13.01    1.37
   5   2  12   13.84    1.41
  -6  -2 -12    4.27    0.55
   6  -2  12    4.02    0.52
  -6   2 -12    4.46    0.56
   6   2  12    5.15    0.60
  -7  -2 -12    1.59    0.32
   7  -2  12    1.52    0.28
  -7   2 -12    1.07    0.29
   7   2  12    1.60    0.33
  -8  -2 -12    7.66    0.95
   8  -2  12    7.71    0.91
   8   2  12    8.37    0.98
  -8   2 -12    8.24    0.96
  -9  -2 -12    0.39    0.22
  -9   2 -12    0.78    0.27
   9   2  12    0.73    0.29
 -10  -2 -12   21.77    2.34
  10   2  12   18.20    2.35
 -10   2 -12   23.98    2.36
 -11  -2 -12    0.28    0.25
  11   2  12    0.02    0.30
 -11   2 -12    0.52    0.27
  10  -3 -12    1.00    0.40
 -10   3  12    2.36    0.47
  10   3 -12    1.45    0.36
  -9  -3  12    1.31    0.28
   9   3 -12    2.64    0.42
  -9   3  12    1.23    0.33
   8  -3 -12    1.32    0.41
  -8  -3  12    1.50    0.30
   8   3 -12    1.86    0.37
  -8   3  12    1.71    0.37
  -7  -3  12    2.13    0.35
   7  -3 -12    3.22    0.61
   7   3 -12    2.39    0.43
  -7   3  12    2.20    0.41
   6  -3 -12   36.66    3.66
  -6  -3  12   35.99    3.48
  -6  -3  12   32.85    3.52
   6   3 -12   31.89    3.51
  -6   3  12   34.50    3.50
  -5  -3  12   10.53    1.04
  -5  -3  12   10.14    1.11
   5  -3 -12   11.25    1.23
   5   3 -12    8.88    1.07
  -5   3  12    8.71    1.05
  -4  -3  12   78.17    7.84
   4  -3 -12   70.13    7.99
  -4  -3  12   82.06    7.93
   4   3 -12   84.03    7.89
  -4   3  12   79.63    7.87
   3  -3 -12    1.80    0.43
  -3  -3  12    2.72    0.43
  -3  -3  12    2.45    0.27
  -3   3  12    2.34    0.30
   3   3 -12    2.22    0.34
   2  -3 -12   13.73    1.61
  -2  -3  12   13.37    1.57
  -2   3  12   15.66    1.50
   2   3 -12   14.84    1.51
  -1  -3  12    0.64    0.20
   1  -3 -12    0.46    0.20
   1   3 -12    0.71    0.13
  -1   3  12    0.60    0.12
   0  -3 -12   99.53   10.07
   0  -3  12   96.51   10.07
   0   3 -12  104.72    9.97
   0   3  12  101.02    9.98
  -1  -3 -12    4.98    0.62
   1  -3  12    4.47    0.62
   1   3  12    6.22    0.57
  -1   3 -12    4.59    0.54
   2  -3  12   23.46    2.25
  -2  -3 -12   23.27    2.22
  -2   3 -12   17.90    2.14
   2   3  12   22.21    2.18
  -3  -3 -12    2.04    0.33
   3  -3  12    1.72    0.35
  -3  -3 -12    1.88    0.23
  -3   3 -12    2.04    0.26
   3   3  12    2.48    0.34
  -4  -3 -12   11.21    1.08
   4  -3  12    9.48    1.12
  -4  -3 -12   10.38    1.05
  -4   3 -12    9.50    1.06
   4   3  12    9.00    1.09
  -5  -3 -12    0.90    0.19
   5  -3  12    0.80    0.23
   5   3  12    0.80    0.23
  -5   3 -12    1.10    0.21
  -6  -3 -12   40.96    4.32
   6  -3  12   42.71    4.37
   6   3  12   45.20    4.39
  -7  -3 -12   15.60    1.74
   7  -3  12   19.05    1.81
   7   3  12   16.33    1.81
  -7   3 -12   15.57    1.77
  -8  -3 -12   12.87    1.43
   8   3  12   15.81    1.53
  -8   3 -12   11.29    1.44
   9   3  12    1.09    0.33
  -9   3 -12    0.49    0.24
  10   3  12    0.87    0.34
 -10   3 -12    0.39    0.27
  10  -4 -12    3.91    0.82
 -10   4  12    3.93    0.74
  10   4 -12    3.67    0.67
   9  -4 -12    4.72    0.90
   9   4 -12    5.43    0.71
   8  -4 -12   21.48    2.33
   8   4 -12   18.73    2.13
   7  -4 -12    1.46    0.42
  -7  -4  12    0.74    0.28
   7   4 -12    1.02    0.29
  -6  -4  12    0.62    0.24
   6  -4 -12    0.36    0.27
   6   4 -12    0.78    0.23
  -5  -4  12   17.46    1.95
   5  -4 -12   17.12    2.05
   5   4 -12   18.97    1.90
   4  -4 -12   29.15    3.23
  -4  -4  12   30.20    3.17
   4   4 -12   30.70    3.08
  -3  -4  12    1.92    0.40
   3  -4 -12    2.14    0.47
   3   4 -12    1.98    0.32
   2  -4 -12   21.30    2.46
  -2  -4  12   24.40    2.45
   2   4 -12   22.81    2.32
  -1  -4  12    8.79    0.93
   1  -4 -12    6.75    0.91
   1   4 -12    6.96    0.78
   0  -4 -12    0.95    0.30
   0  -4  12    1.16    0.31
   0   4 -12    1.63    0.22
   0   4  12    1.46    0.22
   1  -4  12    0.64    0.22
  -1  -4 -12    0.68    0.23
   1   4  12    0.46    0.13
  -1   4 -12    0.48    0.11
  -2  -4 -12   29.15    3.11
   2  -4  12   35.22    3.17
   2   4  12   29.12    3.03
  -2   4 -12   28.53    3.01
   3  -4  12    4.23    0.65
  -3  -4 -12    3.83    0.51
   3   4  12    3.51    0.47
  -3   4 -12    4.24    0.48
   4  -4  12   36.31    3.84
  -4   4 -12   38.96    3.76
   4   4  12   35.75    3.78
   5  -4  12   15.34    1.83
   5   4  12   17.44    1.80
  -5   4 -12   16.89    1.74
   6  -4  12    2.48    0.48
  -6   4 -12    2.50    0.40
   6   4  12    2.43    0.46
   7  -4  12    0.16    0.17
   7   4  12    0.28    0.17
  -7   4 -12    0.28    0.15
   8   4  12    9.33    1.27
  -8   4 -12   12.37    1.29
  -9   4 -12   10.34    1.36
   9   4  12   14.39    1.47
   8  -5 -12    0.59    0.31
   8   5 -12    0.21    0.19
  -7  -5  12    1.90    0.44
   7  -5 -12    2.67    0.62
   7   5 -12    2.44    0.46
   6  -5 -12   14.22    1.57
  -6  -5  12   10.59    1.38
   6   5 -12   11.57    1.31
  -5  -5  12    3.05    0.60
   5  -5 -12    4.43    0.80
   4  -5 -12    8.28    1.10
  -4  -5  12    7.64    1.00
   3  -5 -12    3.82    0.69
  -3  -5  12    2.55    0.55
  -2  -5  12    3.12    0.61
   2  -5 -12    4.49    0.75
   1  -5 -12   21.26    2.31
  -1  -5  12   20.08    2.26
   0  -5  12   18.57    2.10
   0  -5 -12   19.39    2.12
   1  -5  12   22.84    2.48
  -1  -5 -12   22.64    2.46
   2  -5  12    8.06    1.03
  -2  -5 -12    8.34    1.00
   3  -5  12    5.48    0.84
   4  -5  12    2.50    0.52
   5  -5  12    5.73    0.88
   6  -5  12   15.35    1.81
   6   5  12   16.39    1.79
   7   5  12   13.68    1.56
   8   5  12    4.38    0.75
   7  -6 -12    2.99    0.72
  -7  -6  12    2.50    0.56
  -5  -6  12    9.12    1.26
   5  -6 -12   12.26    1.44
   4  -6 -12    7.42    1.21
  -4  -6  12    8.25    1.07
   3  -6 -12   14.67    1.61
  -3  -6  12   10.95    1.48
  -2  -6  12   16.66    2.05
   2  -6 -12   19.56    2.13
  -1  -6  12    3.86    0.72
   1  -6 -12    3.45    0.69
   0  -6  12    0.71    0.30
   0  -6 -12    0.60    0.27
  -1  -6 -12    0.62    0.29
   1  -6  12    0.87    0.33
   2  -6  12    3.29    0.63
   3  -6  12    8.11    1.10
   4  -6  12   11.59    1.42
   5  -6  12   11.62    1.43
   6  -6  12    0.64    0.31
   3  -7 -12    0.84    0.40
  -3  -7  12    0.84    0.36
   2  -7 -12    1.65    0.51
  -2  -7  12    0.53    0.31
   1  -7 -12    8.38    1.07
  -1  -7  12    5.85    1.06
   0  -7  12    8.63    1.28
   0  -7 -12    8.18    1.42
   1  -7  12   17.05    2.04
   2  -7  12    2.76    0.64
   3  -7  12    1.83    0.51
  11   0 -13   31.19    3.47
 -11   0  13   36.44    3.54
 -10   0  13    0.10    0.16
  10   0 -13    1.73    0.30
  -9   0  13   10.03    1.29
   9   0 -13   13.03    1.29
  -8   0  13    0.29    0.16
   8   0 -13    0.76    0.19
   8   0 -13    0.24    0.17
   7   0 -13   11.96    1.19
   7   0 -13   10.11    1.22
  -7   0  13   10.63    1.21
   6   0 -13   -0.01    0.07
  -6   0  13   -0.02    0.10
   6   0 -13    0.09    0.10
  -5   0  13   27.37    2.49
   5   0 -13   24.04    2.54
  -5   0  13   23.78    2.56
   5   0 -13   23.52    2.57
   4   0 -13   -0.02    0.06
   4   0 -13    0.13    0.08
  -4   0  13   -0.01    0.07
  -3   0  13    4.35    0.46
   3   0 -13    3.64    0.44
  -2   0  13    0.00    0.05
   2   0 -13    0.00    0.04
  -1   0  13  277.07   25.40
   1   0 -13  237.06   25.39
   0   0  13   -0.02    0.04
   0   0 -13    0.04    0.04
  -1   0 -13  135.71   14.60
   1   0  13  159.72   14.62
   2   0  13    0.08    0.07
  -2   0 -13    0.04    0.06
   3   0  13   -0.05    0.05
  -3   0 -13    0.01    0.05
  -4   0 -13    0.10    0.08
   4   0  13    0.05    0.08
   5   0  13   75.91    7.60
  -5   0 -13   75.75    7.59
  -6   0 -13    0.00    0.09
   6   0  13    0.07    0.11
  -7   0 -13   45.80    4.71
   7   0  13   46.67    4.72
   8   0  13    0.54    0.22
  -8   0 -13    0.33    0.18
  -9   0 -13    3.97    0.66
   9   0  13    4.27    0.67
 -10   0 -13    0.53    0.26
  10   0  13    0.46    0.24
  11   0  13    8.31    1.18
 -11   0 -13    8.25    1.06
  11  -1 -13    2.08    0.41
 -11  -1  13    2.55    0.49
  11   1 -13    2.11    0.43
 -11   1  13    1.96    0.46
 -10  -1  13    1.43    0.32
  10  -1 -13    0.64    0.26
  10   1 -13    0.95    0.29
 -10   1  13    1.35    0.33
  -9  -1  13   60.36    5.97
   9  -1 -13   69.98    6.06
   9  -1 -13   52.42    5.91
  -9   1  13   65.67    5.99
   9   1 -13   48.91    5.93
   8  -1 -13    0.27    0.19
   8  -1 -13    0.61    0.15
  -8  -1  13    0.16    0.15
   8   1 -13    0.36    0.17
  -8   1  13    0.14    0.13
   7  -1 -13   23.37    2.53
   7  -1 -13   19.75    2.42
  -7  -1  13   28.84    2.50
   7   1 -13   22.74    2.46
  -7   1  13   25.54    2.49
   7   1 -13   23.94    2.47
   6  -1 -13    1.71    0.25
   6  -1 -13    0.69    0.25
  -6  -1  13    1.67    0.28
  -6  -1  13    1.30    0.21
   6   1 -13    1.25    0.25
  -6   1  13    0.77    0.22
   6   1 -13    0.94    0.24
  -5  -1  13   32.13    3.41
   5  -1 -13   32.88    3.38
   5  -1 -13   30.53    3.45
  -5  -1  13   36.76    3.38
  -5   1  13   31.66    3.41
   5   1 -13   36.86    3.41
   4  -1 -13    0.08    0.06
   4  -1 -13    0.03    0.09
  -4  -1  13    0.01    0.06
  -4  -1  13    0.10    0.07
   4   1 -13   -0.05    0.05
  -4   1  13    0.00    0.07
   3  -1 -13   61.14    6.32
  -3  -1  13   70.02    6.35
   3  -1 -13   62.37    6.40
  -3  -1  13   53.95    6.33
   3   1 -13   72.69    6.35
  -3   1  13   62.36    6.35
   2  -1 -13    2.96    0.37
  -2  -1  13    3.26    0.39
   2  -1 -13    4.39    0.46
  -2   1  13    3.61    0.39
   2   1 -13    3.00    0.38
   1  -1 -13    0.24    0.08
  -1  -1  13    0.25    0.09
   1   1 -13    0.44    0.10
  -1   1  13    0.31    0.09
   0  -1  13    0.38    0.10
   0  -1 -13    0.46    0.10
   0   1  13    0.52    0.12
   0   1 -13    0.36    0.10
  -1  -1 -13   55.15    5.11
   1  -1  13   44.32    5.11
  -1   1 -13   55.27    5.11
   1   1  13   50.25    5.12
   2  -1  13    5.99    0.69
  -2   1 -13    5.81    0.68
   2   1  13    7.67    0.72
  -3  -1 -13   52.36    5.84
   3  -1  13   55.12    5.84
   3   1  13   66.15    5.87
  -3   1 -13   60.81    5.84
   4  -1  13    6.96    0.72
  -4  -1 -13    5.85    0.71
  -4   1 -13    6.37    0.70
   4   1  13    5.90    0.72
  -5  -1 -13   30.54    3.34
   5  -1  13   31.35    3.34
   5   1  13   37.03    3.37
   6  -1  13    1.00    0.24
  -6  -1 -13    1.08    0.26
  -6   1 -13    0.89    0.23
   6   1  13    1.25    0.29
  -7  -1 -13    1.73    0.35
   7  -1  13    1.52    0.33
  -7   1 -13    1.84    0.36
   7   1  13    1.30    0.32
   8  -1  13    1.82    0.37
  -8  -1 -13    2.04    0.40
   8   1  13    1.76    0.39
  -8   1 -13    1.45    0.35
  -9  -1 -13   28.71    2.66
   9  -1  13   23.61    2.61
   9   1  13   23.56    2.66
  -9   1 -13   23.08    2.63
 -10  -1 -13    1.09    0.33
  10  -1  13    0.75    0.29
  10   1  13    1.25    0.36
 -10   1 -13    0.85    0.32
 -11  -1 -13   22.98    2.15
  11  -1  13   17.94    2.08
 -11   1 -13   16.46    2.12
  11   1  13   18.14    2.15
 -11  -2  13   17.85    2.15
  11   2 -13   23.07    2.20
 -11   2  13   19.12    2.17
  10  -2 -13    0.18    0.24
 -10   2  13    2.09    0.37
  -9  -2  13    0.45    0.21
   9  -2 -13    0.22    0.24
  -9   2  13    0.17    0.18
   9   2 -13    0.01    0.15
   8  -2 -13    0.87    0.18
   8  -2 -13    0.86    0.29
  -8  -2  13    1.71    0.29
  -8   2  13    0.56    0.23
   8   2 -13    0.47    0.20
  -7  -2  13   46.25    5.07
   7  -2 -13   52.11    5.21
   7  -2 -13   54.15    5.03
   7   2 -13   48.47    5.09
  -6  -2  13    0.00    0.09
  -6  -2  13    0.08    0.10
   6  -2 -13    0.12    0.15
   6  -2 -13    0.04    0.06
  -6   2  13    0.12    0.12
   6   2 -13    0.05    0.11
  -5  -2  13   29.67    2.91
   5  -2 -13   28.93    3.01
   5  -2 -13   31.03    2.87
  -5  -2  13   26.45    2.89
   5   2 -13   27.87    2.91
  -5   2  13   26.74    2.91
   4  -2 -13    1.67    0.21
   4  -2 -13    1.70    0.36
  -4  -2  13    1.61    0.29
  -4  -2  13    1.72    0.27
  -4   2  13    1.66    0.28
   4   2 -13    1.82    0.29
   3  -2 -13   -0.01    0.09
   3  -2 -13    0.05    0.05
  -3  -2  13    0.08    0.06
  -3  -2  13    0.07    0.08
   3   2 -13    0.14    0.08
  -3   2  13    0.08    0.07
  -2  -2  13    1.37    0.27
  -2  -2  13    1.58    0.21
   2  -2 -13    1.62    0.19
   2  -2 -13    1.89    0.33
   2   2 -13    1.34    0.23
  -2   2  13    1.38    0.23
  -1  -2  13   52.23    4.97
   1  -2 -13   46.89    5.00
   1  -2 -13   46.14    4.90
  -1  -2  13   52.38    4.92
  -1   2  13   43.31    4.92
   1   2 -13   55.95    4.93
   0  -2 -13    2.30    0.28
   0  -2  13    2.72    0.29
   0  -2 -13    2.51    0.39
   0  -2  13    2.43    0.37
   0   2  13    2.51    0.30
   0   2 -13    2.38    0.29
  -1  -2 -13   97.46   10.41
   1  -2  13  102.34   10.36
  -1  -2 -13  106.44   10.36
  -1   2 -13   97.38   10.36
   1   2  13  119.44   10.39
   2  -2  13   27.06    2.81
  -2  -2 -13   26.58    2.82
  -2   2 -13   28.62    2.82
   2   2  13   30.26    2.85
  -3  -2 -13    6.09    0.69
   3  -2  13    6.26    0.68
   3   2  13    6.92    0.72
  -3   2 -13    5.96    0.68
   4  -2  13    0.67    0.16
  -4  -2 -13    0.66    0.16
   4   2  13    0.65    0.19
  -4   2 -13    0.72    0.16
   5  -2  13   52.31    5.23
  -5  -2 -13   56.72    5.26
   5   2  13   47.36    5.27
  -6  -2 -13    7.88    0.93
   6  -2  13    8.19    0.90
  -6   2 -13    8.38    0.93
   6   2  13    8.19    0.96
   7  -2  13   39.28    4.04
  -7  -2 -13   43.12    4.08
  -7   2 -13   43.52    4.08
   7   2  13   33.45    4.08
   8  -2  13    1.12    0.26
  -8  -2 -13    1.12    0.29
  -8   2 -13    0.91    0.29
   8   2  13    1.23    0.35
  -9  -2 -13    0.99    0.33
  -9   2 -13    1.06    0.34
   9   2  13    0.35    0.25
 -10  -2 -13    1.64    0.42
  10   2  13    2.09    0.47
 -10   2 -13    2.04    0.47
 -11  -2 -13    4.03    0.74
  11   2  13    4.55    0.84
 -11   2 -13    5.39    0.82
  10  -3 -13    3.75    0.84
  10   3 -13    5.06    0.78
 -10   3  13    5.80    0.72
  -9  -3  13   18.52    2.03
   9  -3 -13   19.53    2.20
  -9   3  13   20.38    2.08
   9   3 -13   18.11    2.05
  -8  -3  13    3.51    0.51
   8  -3 -13    4.71    0.79
   8   3 -13    4.49    0.57
  -8   3  13    4.19    0.63
   7  -3 -13   16.50    1.95
  -7  -3  13   17.63    1.79
   7   3 -13   15.87    1.81
  -7   3  13   17.57    1.82
  -6  -3  13    0.01    0.12
  -6  -3  13    0.21    0.12
   6  -3 -13   -0.08    0.15
   6   3 -13    0.21    0.13
  -6   3  13    0.17    0.12
  -5  -3  13   37.06    3.28
   5  -3 -13   31.49    3.36
  -5  -3  13   30.51    3.18
   5   3 -13   27.49    3.21
  -5   3  13   32.63    3.22
  -4  -3  13    8.54    0.90
   4  -3 -13    9.10    1.07
  -4  -3  13    8.42    0.98
  -4   3  13    8.51    0.92
   4   3 -13    8.32    0.93
  -3  -3  13   88.08    9.66
   3  -3 -13   97.28    9.73
  -3  -3  13   96.74    9.56
   3   3 -13  107.75    9.61
  -3   3  13   92.60    9.59
  -2  -3  13   12.12    1.45
   2  -3 -13   15.67    1.53
  -2  -3  13   13.25    1.34
   2   3 -13   13.19    1.39
  -2   3  13   13.79    1.39
   1  -3 -13    0.66    0.22
  -1  -3  13    0.77    0.22
   1   3 -13    0.77    0.15
  -1   3  13    0.81    0.15
   0  -3  13    1.77    0.33
   0  -3 -13    1.21    0.29
   0   3  13    1.56    0.22
   0   3 -13    1.43    0.21
   1  -3  13    7.38    0.89
  -1  -3 -13    6.73    0.88
  -1   3 -13    8.34    0.81
   1   3  13    7.75    0.82
   2  -3  13    1.85    0.36
  -2  -3 -13    2.02    0.35
  -2   3 -13    2.11    0.25
   2   3  13    1.60    0.29
  -3  -3 -13   55.02    6.12
   3  -3  13   62.11    6.17
  -3  -3 -13   60.23    6.06
  -3   3 -13   59.95    6.08
   3   3  13   68.76    6.13
   4  -3  13   11.79    1.15
  -4  -3 -13   10.10    1.09
  -4  -3 -13    9.23    1.05
  -4   3 -13   10.68    1.08
   4   3  13    9.09    1.10
  -5  -3 -13   38.54    4.05
   5  -3  13   42.16    4.13
  -5   3 -13   44.49    4.08
   5   3  13   35.94    4.10
   6  -3  13    0.48    0.19
  -6  -3 -13    0.21    0.12
   6   3  13    0.50    0.21
  -7  -3 -13    2.17    0.39
   7  -3  13    2.73    0.45
   7   3  13    2.27    0.47
  -7   3 -13    2.35    0.43
  -8  -3 -13    1.40    0.32
   8   3  13    1.40    0.36
  -8   3 -13    1.20    0.33
  -9   3 -13   10.79    1.25
   9   3  13    9.60    1.27
 -10   3 -13    1.30    0.43
  10   3  13    1.71    0.50
  10  -4 -13   -0.05    0.24
   9  -4 -13    0.41    0.31
   9   4 -13    0.11    0.18
  -9   4  13   -0.19    0.29
   8  -4 -13    6.21    1.01
   8   4 -13    5.22    0.79
   7  -4 -13   24.88    2.59
   7   4 -13   21.27    2.38
  -6  -4  13   10.35    1.22
   6  -4 -13   11.85    1.37
   6   4 -13    9.88    1.17
   5  -4 -13   10.69    1.37
  -5  -4  13    9.96    1.27
   5   4 -13   12.16    1.23
   4  -4 -13   30.59    3.42
  -4  -4  13   32.35    3.36
   4   4 -13   32.88    3.27
  -3  -4  13    4.16    0.65
   3  -4 -13    4.65    0.74
   3   4 -13    4.22    0.51
   2  -4 -13    1.34    0.37
  -2  -4  13    1.29    0.33
   2   4 -13    1.53    0.25
   1  -4 -13   33.46    3.51
  -1  -4  13   31.40    3.48
   1   4 -13   34.66    3.36
   0  -4  13   34.40    3.23
   0  -4 -13   27.29    3.20
   0   4  13   31.14    3.08
   0   4 -13   30.37    3.08
  -1  -4 -13   54.07    5.81
   1  -4  13   55.79    5.82
   1   4  13   54.79    5.70
  -1   4 -13   62.71    5.69
  -2  -4 -13   28.08    2.48
   2  -4  13   20.00    2.45
   2   4  13   21.52    2.36
  -2   4 -13   23.53    2.34
  -3  -4 -13    3.65    0.51
   3  -4  13    4.12    0.63
   3   4  13    3.77    0.46
  -3   4 -13    3.46    0.43
   4  -4  13    3.54    0.59
   4   4  13    3.69    0.53
  -4   4 -13    3.36    0.42
   5  -4  13   19.49    2.08
  -5   4 -13   19.21    1.98
   5   4  13   18.57    2.03
   6  -4  13   12.24    1.47
   6   4  13   12.26    1.44
  -6   4 -13   13.94    1.41
   7  -4  13   20.13    2.12
  -7   4 -13   18.73    2.05
   7   4  13   19.11    2.10
  -8   4 -13   -0.06    0.14
   8   4  13    0.27    0.21
  -9   4 -13    4.25    0.76
   9   4  13    5.93    0.86
   8  -5 -13    2.72    0.70
   8   5 -13    2.72    0.51
  -7  -5  13    8.04    1.33
   7  -5 -13   14.65    1.58
   7   5 -13   12.37    1.29
  -6  -5  13    0.14    0.19
   6   5 -13    0.15    0.15
  -5  -5  13    2.38    0.52
   5  -5 -13    3.81    0.70
  -4  -5  13   14.57    1.84
   4  -5 -13   19.02    1.98
  -3  -5  13   27.10    2.54
   3  -5 -13   19.26    2.52
   2  -5 -13   10.11    1.24
  -2  -5  13    9.25    1.17
  -1  -5  13    4.70    0.77
   1  -5 -13    4.71    0.79
   0  -5 -13    0.35    0.22
   0  -5  13    0.15    0.15
  -1  -5 -13    4.97    0.76
   1  -5  13    4.04    0.71
  -2  -5 -13    8.98    1.00
   2  -5  13    6.84    0.99
   3  -5  13   23.99    2.61
   4  -5  13   14.07    1.63
   5  -5  13    8.79    1.11
   6  -5  13    1.39    0.38
   6   5  13    1.65    0.39
   7   5  13    1.99    0.44
   8   5  13    1.96    0.47
  -6  -6  13    2.36    0.59
   6  -6 -13    2.77    0.66
  -5  -6  13   11.25    1.41
   5  -6 -13   12.05    1.55
  -4  -6  13    3.69    0.71
   4  -6 -13    3.94    0.78
  -3  -6  13   -0.01    0.19
   3  -6 -13    0.31    0.27
   2  -6 -13    0.29    0.26
  -2  -6  13    0.84    0.34
  -1  -6  13    6.45    1.10
   1  -6 -13    8.92    1.09
   0  -6 -13   19.65    2.37
   0  -6  13   23.69    2.43
  -1  -6 -13   21.84    2.23
   1  -6  13   17.82    2.21
   2  -6  13   18.68    2.12
   3  -6  13    0.19    0.21
   4  -6  13    3.68    0.70
   5  -6  13    2.46    0.56
   6  -6  13    8.18    1.09
   3  -7 -13    5.29    1.02
  -3  -7  13    5.81    0.98
   2  -7 -13    9.13    1.35
  -2  -7  13   11.71    1.39
   1  -7 -13    2.11    0.55
  -1  -7  13    2.13    0.56
   0  -7  13    1.11    0.43
   1  -7  13    0.44    0.30
   2  -7  13    1.39    0.46
   3  -7  13    9.97    1.33
 -10   0  14   14.64    1.56
  10   0 -14   13.14    1.51
  -9   0  14    0.05    0.16
   9   0 -14    0.95    0.22
   8   0 -14    6.16    0.80
   8   0 -14    8.20    0.88
  -8   0  14    6.48    0.82
   7   0 -14    0.08    0.13
  -7   0  14    0.07    0.12
   7   0 -14    0.16    0.11
  -6   0  14    0.07    0.10
   6   0 -14    0.19    0.10
   6   0 -14    0.10    0.10
  -5   0  14    0.02    0.05
  -5   0  14   -0.03    0.07
   5   0 -14    0.04    0.09
   5   0 -14    0.08    0.08
  -4   0  14  117.37   11.38
   4   0 -14  111.57   11.35
   3   0 -14   -0.01    0.04
  -3   0  14    0.05    0.07
   2   0 -14  128.87   12.90
  -2   0  14  131.70   12.92
  -1   0  14    0.04    0.06
   1   0 -14    0.11    0.06
   0   0 -14    6.98    0.69
   0   0  14    5.95    0.70
  -1   0 -14    0.20    0.07
   1   0  14    0.09    0.06
  -2   0 -14  170.56   14.71
   2   0  14  126.40   14.70
  -3   0 -14    0.01    0.06
   3   0  14    0.02    0.08
   4   0  14   73.11    7.32
   5   0  14    0.17    0.12
  -5   0 -14    0.15    0.10
  -6   0 -14    3.07    0.48
   6   0  14    3.16    0.50
   7   0  14    0.26    0.16
  -7   0 -14    0.02    0.10
  -8   0 -14   44.63    4.15
   8   0  14   35.79    4.12
   9   0  14    0.02    0.16
  -9   0 -14    0.08    0.16
  10   0  14   24.54    2.61
 -10   0 -14   23.34    2.64
 -11   0 -14    0.21    0.21
  11   0  14    0.31    0.26
  11   1 -14    1.95    0.41
 -11   1  14    2.35    0.48
  10  -1 -14    0.91    0.25
 -10  -1  14    1.32    0.33
  10   1 -14    0.70    0.26
 -10   1  14    0.65    0.27
   9  -1 -14    2.12    0.46
  -9   1  14    1.52    0.39
   9   1 -14    3.28    0.44
  -8  -1  14   21.71    2.44
   8  -1 -14   21.45    2.39
  -8   1  14   25.42    2.47
   8   1 -14   25.26    2.44
  -7  -1  14    3.24    0.45
   7  -1 -14    2.77    0.38
   7  -1 -14    2.21    0.46
   7   1 -14    2.10    0.39
   7   1 -14    2.62    0.41
  -7   1  14    1.91    0.39
  -6  -1  14   88.25    8.13
   6  -1 -14   73.87    8.08
   6  -1 -14   70.03    8.16
   6   1 -14   73.97    8.11
  -6   1  14   92.93    8.14
   6   1 -14   89.38    8.12
   5  -1 -14    7.36    0.94
   5  -1 -14    7.53    0.86
  -5  -1  14    8.47    0.87
  -5  -1  14    9.44    0.90
   5   1 -14    8.45    0.89
  -5   1  14    7.12    0.89
   4  -1 -14    1.79    0.22
  -4  -1  14    1.41    0.24
   4  -1 -14    1.03    0.28
  -4  -1  14    2.05    0.29
  -4   1  14    1.99    0.29
   4   1 -14    1.67    0.27
   3  -1 -14   -0.02    0.04
   3  -1 -14    0.09    0.10
  -3  -1  14    0.05    0.05
  -3  -1  14    0.09    0.07
   3   1 -14   -0.02    0.05
  -3   1  14    0.07    0.07
  -2  -1  14   19.97    1.92
   2  -1 -14   17.62    1.89
   2   1 -14   18.78    1.91
  -1  -1  14   14.08    1.45
   1  -1 -14   16.88    1.45
  -1   1  14   12.66    1.45
   1   1 -14   12.97    1.44
   0  -1 -14   63.72    5.94
   0  -1  14   54.86    5.94
   0   1 -14   63.38    5.94
   0   1  14   56.73    5.95
  -1  -1 -14    0.78    0.16
   1  -1  14    0.99    0.18
  -1   1 -14    0.93    0.17
   1   1  14    1.28    0.20
   2  -1  14   51.99    5.28
  -2   1 -14   53.46    5.27
   2   1  14   52.89    5.29
   3  -1  14    5.98    0.68
  -3  -1 -14    5.06    0.66
  -3   1 -14    5.81    0.66
   3   1  14    7.53    0.70
  -4  -1 -14   10.61    1.25
   4  -1  14   14.32    1.28
  -4   1 -14   11.85    1.25
   4   1  14   10.80    1.27
  -5  -1 -14    0.37    0.15
   5  -1  14    0.52    0.17
   5   1  14    0.42    0.18
  -6  -1 -14   78.74    8.28
   6  -1  14   94.45    8.30
   6   1  14   79.91    8.29
  -6   1 -14   77.76    8.27
  -7  -1 -14    0.46    0.19
   7  -1  14    0.34    0.17
  -7   1 -14    0.45    0.18
   7   1  14    0.27    0.17
  -8  -1 -14   12.61    1.56
   8  -1  14   12.71    1.55
   8   1  14   16.95    1.61
  -8   1 -14   14.47    1.56
  -9  -1 -14    0.35    0.19
   9  -1  14    0.63    0.23
  -9   1 -14    0.37    0.21
   9   1  14    1.10    0.30
 -10  -1 -14    6.43    0.83
  10  -1  14    5.74    0.87
 -10   1 -14    5.23    0.90
  10   1  14    6.80    0.86
 -11  -1 -14    1.03    0.34
  11  -1  14    0.81    0.30
 -11   1 -14    0.56    0.29
  11   1  14    0.88    0.38
 -11  -2  14    1.83    0.42
 -11   2  14    1.26    0.38
  10  -2 -14   26.02    2.76
 -10  -2  14   22.90    2.66
  10   2 -14   27.93    2.67
 -10   2  14   23.49    2.65
   9  -2 -14    1.01    0.38
  -9  -2  14    2.20    0.40
  -9   2  14    1.51    0.36
   9   2 -14    1.48    0.35
   8  -2 -14   11.67    1.27
   8  -2 -14   12.96    1.46
  -8  -2  14   13.85    1.35
   8   2 -14   12.12    1.35
  -8   2  14   10.48    1.34
   7  -2 -14    4.04    0.69
  -7  -2  14    4.34    0.52
   7  -2 -14    3.82    0.46
   7   2 -14    3.85    0.57
  -7   2  14    3.76    0.58
   6  -2 -14    1.89    0.27
   6  -2 -14    2.30    0.47
  -6  -2  14    2.51    0.37
  -6  -2  14    2.04    0.35
   6   2 -14    2.67    0.40
  -6   2  14    2.39    0.38
  -5  -2  14    0.42    0.15
   5  -2 -14    0.48    0.11
   5  -2 -14    0.42    0.20
  -5  -2  14    0.47    0.15
   5   2 -14    0.36    0.15
  -5   2  14    0.53    0.16
  -4  -2  14   67.39    7.04
   4  -2 -14   81.47    7.17
  -4  -2  14   64.42    7.06
   4  -2 -14   66.37    7.01
   4   2 -14   76.89    7.06
  -4   2  14   69.61    7.05
   3  -2 -14    7.07    0.86
  -3  -2  14    7.36    0.77
   3  -2 -14    7.19    0.74
  -3  -2  14    6.05    0.79
  -3   2  14    7.11    0.77
   3   2 -14    7.71    0.78
  -2  -2  14   83.95    9.15
   2  -2 -14   95.28    9.09
   2  -2 -14   95.67    9.20
  -2  -2  14   87.78    9.10
  -2   2  14  101.53    9.12
   2   2 -14   86.44    9.11
   1  -2 -14    0.24    0.07
  -1  -2  14    0.31    0.09
  -1  -2  14    0.40    0.13
   1  -2 -14    0.37    0.15
   1   2 -14    0.33    0.09
  -1   2  14    0.38    0.11
   0  -2 -14    3.42    0.49
   0  -2  14    4.25    0.44
   0   2  14    3.47    0.45
   0   2 -14    4.48    0.45
  -1  -2 -14    2.60    0.37
  -1  -2 -14    2.93    0.32
   1  -2  14    2.18    0.31
  -1   2 -14    3.09    0.33
   1   2  14    2.53    0.33
  -2  -2 -14   68.17    7.26
   2  -2  14   77.63    7.26
  -2   2 -14   77.45    7.27
   2   2  14   68.63    7.28
  -3  -2 -14    2.19    0.31
   3  -2  14    2.15    0.30
   3   2  14    1.64    0.32
  -3   2 -14    2.19    0.28
   4  -2  14   40.26    3.78
  -4  -2 -14   34.83    3.78
  -4   2 -14   39.81    3.78
   4   2  14   34.62    3.80
  -5  -2 -14    0.83    0.20
   5  -2  14    0.70    0.18
  -5   2 -14    0.61    0.17
   5   2  14    1.02    0.25
   6  -2  14   28.63    3.03
  -6  -2 -14   32.46    3.07
   6   2  14   28.14    3.08
  -7  -2 -14    0.23    0.16
   7  -2  14    0.33    0.14
   7   2  14    0.28    0.17
  -7   2 -14    0.11    0.13
  -8  -2 -14   13.80    1.28
   8  -2  14   10.20    1.18
  -8   2 -14    9.86    1.23
   8   2  14    9.45    1.23
  -9  -2 -14    6.61    0.86
   9   2  14    7.11    0.91
  -9   2 -14    6.26    0.85
 -10  -2 -14   20.76    2.19
 -10   2 -14   21.06    2.19
  10   2  14   16.91    2.19
  10  -3 -14    1.92    0.52
  10   3 -14    2.03    0.45
 -10   3  14    1.30    0.37
  -9  -3  14    0.24    0.16
   9  -3 -14    0.29    0.27
  -9   3  14   -0.08    0.13
   9   3 -14    0.03    0.15
  -8  -3  14    5.62    0.69
   8  -3 -14    6.46    0.98
  -8   3  14    5.05    0.71
   8   3 -14    6.10    0.73
   7  -3 -14   13.38    1.40
  -7  -3  14   11.29    1.20
   7   3 -14   10.34    1.22
  -7   3  14    9.81    1.21
   6  -3 -14   47.20    4.93
  -6  -3  14   52.38    4.82
  -6  -3  14   49.32    4.76
  -6   3  14   45.57    4.78
   6   3 -14   42.00    4.77
  -5  -3  14    2.72    0.43
  -5  -3  14    2.33    0.30
   5  -3 -14    2.06    0.49
  -5   3  14    1.90    0.34
   5   3 -14    2.35    0.38
   4  -3 -14    7.98    1.08
  -4  -3  14    9.90    0.95
  -4  -3  14    9.08    1.03
   4   3 -14    8.38    0.98
  -4   3  14    8.88    0.97
  -3  -3  14    0.69    0.13
  -3  -3  14    0.57    0.21
   3  -3 -14    0.79    0.27
   3   3 -14    0.72    0.17
  -3   3  14    0.83    0.17
   2  -3 -14   21.92    2.65
  -2  -3  14   29.35    2.65
  -2  -3  14   23.62    2.51
   2   3 -14   25.37    2.56
  -2   3  14   26.88    2.55
   1  -3 -14    6.30    0.84
  -1  -3  14    7.29    0.84
   1   3 -14    7.50    0.76
  -1   3  14    6.93    0.75
   0  -3  14  104.79   10.68
   0  -3 -14  105.22   10.69
   0   3 -14  106.37   10.59
   0   3  14  110.40   10.60
   1  -3  14    6.87    0.81
  -1  -3 -14    6.76    0.81
   1   3  14    6.60    0.74
  -1   3 -14    7.02    0.73
  -2  -3 -14   58.74    6.15
  -2   3 -14   67.16    6.09
   2   3  14   56.99    6.10
  -3  -3 -14    0.49    0.11
  -3  -3 -14    0.43    0.15
   3  -3  14    0.67    0.21
   3   3  14    0.66    0.17
  -3   3 -14    0.68    0.14
   4  -3  14    3.20    0.53
  -4  -3 -14    3.86    0.44
  -4  -3 -14    3.91    0.47
   4   3  14    4.37    0.50
  -4   3 -14    2.97    0.43
   5  -3  14   13.93    1.53
  -5  -3 -14   14.14    1.47
   5   3  14   14.34    1.53
  -5   3 -14   13.56    1.48
   6  -3  14   13.31    1.51
  -6  -3 -14   15.74    1.49
  -6   3 -14   13.07    1.48
   6   3  14   12.89    1.52
   7  -3  14    2.41    0.43
  -7  -3 -14    2.78    0.42
  -7   3 -14    2.20    0.42
   7   3  14    1.85    0.43
  -8  -3 -14    1.23    0.34
  -8   3 -14    1.57    0.36
   8   3  14    1.43    0.37
   9   3  14    1.28    0.42
  -9   3 -14    1.15    0.36
 -10   3 -14    3.27    0.64
  10   3  14    3.29    0.70
   9  -4 -14    6.87    1.10
   9   4 -14    5.33    0.83
  -9   4  14    5.64    0.95
   8  -4 -14   12.50    1.66
   8   4 -14   14.28    1.52
   7  -4 -14    4.59    0.86
   7   4 -14    5.37    0.67
   6  -4 -14    0.41    0.26
  -6  -4  14    0.06    0.17
   6   4 -14    0.29    0.15
   5  -4 -14    0.63    0.29
  -5  -4  14    0.29    0.20
   5   4 -14    0.16    0.14
   4  -4 -14   22.21    2.73
  -4  -4  14   25.90    2.69
   4   4 -14   26.92    2.60
  -3  -4  14   31.03    3.27
   3  -4 -14   31.35    3.34
   3   4 -14   31.20    3.17
  -2  -4  14   40.52    4.45
   2  -4 -14   41.80    4.50
   2   4 -14   46.38    4.35
  -1  -4  14   10.12    0.99
   1  -4 -14    8.07    0.98
  -1   4  14    7.07    0.83
   1   4 -14    7.35    0.82
   0  -4 -14    2.46    0.47
   0  -4  14    2.19    0.44
   0   4 -14    2.52    0.30
   0   4  14    2.33    0.30
  -1  -4 -14   21.12    2.32
   1  -4  14   23.10    2.34
   1   4  14   21.08    2.21
  -1   4 -14   21.99    2.20
  -2  -4 -14   17.28    1.86
   2  -4  14   16.76    1.88
  -2   4 -14   15.92    1.75
   2   4  14   19.13    1.80
  -3  -4 -14   17.60    1.88
   3  -4  14   19.89    1.95
  -3   4 -14   17.19    1.80
   3   4  14   16.45    1.83
   4  -4  14   23.16    2.14
   4   4  14   17.49    2.02
  -4   4 -14   18.70    1.98
   5  -4  14    0.02    0.14
  -5   4 -14    0.09    0.10
   5   4  14    0.29    0.17
   6  -4  14    0.21    0.19
  -6   4 -14    0.44    0.16
   6   4  14    0.31    0.18
   7  -4  14    0.28    0.22
   7   4  14    0.37    0.21
  -7   4 -14    0.17    0.15
  -8   4 -14   22.63    2.39
   8   4  14   20.93    2.37
   9   4  14    7.28    0.96
  -9   4 -14    6.92    0.91
   8  -5 -14    5.52    1.04
   8   5 -14    5.85    0.76
   7  -5 -14    6.86    1.09
   7   5 -14    4.97    0.77
   6  -5 -14    8.41    1.31
  -6  -5  14    6.64    1.10
   6   5 -14    9.63    1.00
  -5  -5  14   15.61    1.74
   5  -5 -14   14.39    1.80
   4  -5 -14    0.56    0.28
  -4  -5  14    0.39    0.24
   3  -5 -14    0.72    0.32
  -3  -5  14    0.20    0.20
   2  -5 -14   18.35    1.95
  -2  -5  14   15.29    1.86
   1  -5 -14    7.24    0.95
  -1  -5  14    6.85    0.93
   0  -5  14   23.89    2.46
   0  -5 -14   21.07    2.44
  -1  -5 -14    5.99    0.89
   1  -5  14    8.51    0.96
  -2  -5 -14   12.76    1.35
   2  -5  14   10.16    1.36
   3  -5  14    0.13    0.17
   4  -5  14    5.01    0.80
   5  -5  14   10.55    1.30
   6  -5  14   28.93    2.81
   6   5  14   23.01    2.70
   7  -5  14    2.54    0.61
   7   5  14    2.47    0.50
   8   5  14    3.92    0.72
  -6  -6  14    0.21    0.23
   5  -6 -14    3.38    0.72
  -5  -6  14    2.47    0.57
   4  -6 -14   10.91    1.49
  -4  -6  14   12.07    1.42
  -3  -6  14   22.99    2.49
   3  -6 -14   21.16    2.53
  -2  -6  14   17.62    2.08
   2  -6 -14   18.63    2.12
  -1  -6  14    3.73    0.71
   1  -6 -14    3.58    0.70
   0  -6 -14   -0.12    0.15
   0  -6  14    0.07    0.21
  -1  -6 -14    5.51    0.84
   1  -6  14    4.81    0.85
   2  -6  14    8.31    1.11
   3  -6  14    2.81    0.60
   4  -6  14    7.71    1.15
   5  -6  14    0.97    0.36
   6  -6  14    0.07    0.21
   3  -7 -14    1.32    0.46
  -3  -7  14    1.05    0.42
  -2  -7  14    1.25    0.45
   2  -7 -14    1.19    0.45
   1  -7 -14   11.27    1.54
  -1  -7  14   12.74    1.55
   0  -7  14   11.08    1.46
   1  -7  14    9.94    1.34
   2  -7  14    0.35    0.31
  11   0 -15   16.34    1.65
 -11   0  15   13.46    1.68
 -10   0  15    2.68    0.48
  -9   0  15    1.15    0.32
   9   0 -15    0.99    0.27
   8   0 -15   -0.13    0.09
   8   0 -15    0.25    0.14
  -8   0  15   -0.11    0.11
   7   0 -15   42.60    4.31
  -7   0  15   44.78    4.29
   7   0 -15   39.04    4.24
   6   0 -15    0.01    0.08
   6   0 -15    0.00    0.10
  -6   0  15    0.00    0.10
   5   0 -15   37.46    3.85
   5   0 -15   37.31    3.90
  -5   0  15   39.42    3.81
   4   0 -15    0.00    0.06
  -4   0  15   -0.01    0.07
  -3   0  15   14.18    1.39
   3   0 -15   12.53    1.37
  -2   0  15    0.06    0.07
   2   0 -15    0.01    0.04
  -1   0  15   97.32    9.20
   1   0 -15   88.02    9.18
   0   0 -15    0.05    0.06
   0   0  15    0.00    0.06
   1   0  15  168.79   18.20
  -1   0 -15  198.67   18.19
  -2   0 -15    0.34    0.10
   2   0  15    0.11    0.07
   3   0  15    6.03    0.68
  -3   0 -15    5.74    0.66
   4   0  15    0.11    0.10
   5   0  15   91.77   10.80
  -5   0 -15  125.77   10.83
  -6   0 -15    0.07    0.11
   6   0  15   -0.07    0.09
   7   0  15   13.96    1.54
  -7   0 -15   13.90    1.53
   8   0  15    0.30    0.19
  -8   0 -15    0.00    0.14
  -9   0 -15    4.87    0.75
   9   0  15    4.79    0.78
  10   0  15    0.44    0.25
 -10   0 -15    0.54    0.27
 -11   0 -15    4.68    0.80
  11   0  15    4.33    0.78
 -11  -1  15   14.05    1.59
  11  -1 -15   14.09    1.58
 -11   1  15   13.60    1.61
  11   1 -15   13.90    1.57
  10  -1 -15    0.24    0.16
 -10  -1  15    0.86    0.29
 -10   1  15    0.77    0.27
  10   1 -15    0.78    0.24
   9  -1 -15   27.22    3.04
   9  -1 -15   28.46    2.93
  -9  -1  15   26.39    2.97
  -9   1  15   32.09    3.01
   9   1 -15   28.61    2.97
   8  -1 -15   -0.03    0.14
   8  -1 -15    0.18    0.12
  -8  -1  15    0.29    0.17
   8   1 -15    0.06    0.12
  -8   1  15   -0.08    0.10
   7  -1 -15    0.53    0.22
  -7  -1  15    1.05    0.25
   7  -1 -15    0.77    0.18
   7   1 -15    0.46    0.16
   7   1 -15    0.36    0.16
  -7   1  15    0.38    0.18
   6  -1 -15    5.63    0.63
  -6  -1  15    7.09    0.69
   6  -1 -15    6.46    0.74
  -6   1  15    5.33    0.67
   6   1 -15    4.41    0.63
   6   1 -15    5.13    0.66
  -5  -1  15    6.54    0.79
  -5  -1  15    7.06    0.76
   5  -1 -15    9.36    0.90
   5   1 -15    6.38    0.78
  -5   1  15    6.77    0.80
  -4  -1  15    0.08    0.07
   4  -1 -15    0.06    0.06
  -4  -1  15    0.04    0.06
   4  -1 -15    0.01    0.08
   4   1 -15    0.05    0.07
  -4   1  15   -0.03    0.06
   3  -1 -15   69.93    7.41
   3  -1 -15   83.77    7.34
  -3  -1  15   63.72    7.35
   3   1 -15   83.49    7.36
  -3   1  15   67.88    7.35
   2  -1 -15   42.03    3.82
  -2  -1  15   34.25    3.83
  -2   1  15   43.19    3.84
   2   1 -15   33.58    3.82
  -1  -1  15   70.98    6.87
  -1   1  15   75.21    6.87
   1   1 -15   61.19    6.85
   0  -1 -15    2.34    0.30
   0  -1  15    2.13    0.30
   0   1  15    2.63    0.32
   0   1 -15    2.89    0.31
  -1  -1 -15   16.29    1.66
   1  -1  15   15.15    1.66
   1   1  15   16.31    1.67
  -1   1 -15   16.84    1.65
   2  -1  15   10.60    1.08
  -2  -1 -15    9.40    1.07
   2   1  15   12.20    1.10
  -2   1 -15    8.84    1.06
   3  -1  15  140.28   12.52
  -3  -1 -15  127.95   12.51
   3   1  15  130.48   12.52
  -3   1 -15  105.96   12.49
   4  -1  15    8.14    0.85
  -4  -1 -15    8.05    0.85
  -4   1 -15    7.79    0.84
   4   1  15    6.11    0.84
   5  -1  15    3.85    0.53
  -5  -1 -15    4.42    0.55
   5   1  15    4.75    0.57
   6  -1  15    0.30    0.16
  -6  -1 -15    0.19    0.12
   6   1  15    0.17    0.13
  -6   1 -15    0.53    0.16
  -7  -1 -15   23.37    2.33
   7  -1  15   21.01    2.31
   7   1  15   18.50    2.30
  -7   1 -15   25.28    2.34
   8  -1  15    0.14    0.16
  -8  -1 -15    0.27    0.18
  -8   1 -15    0.18    0.16
   8   1  15    0.17    0.15
   9  -1  15   40.59    3.76
  -9  -1 -15   37.82    3.73
   9   1  15   34.60    3.74
  -9   1 -15   30.07    3.71
 -10  -1 -15    0.10    0.19
  10  -1  15    0.21    0.21
  10   1  15    0.07    0.20
 -10   1 -15    0.11    0.20
  11  -1  15    5.24    0.87
 -11  -1 -15    5.65    0.93
 -11   1 -15    6.35    1.04
  11   1  15    7.90    1.06
 -11  -2  15    9.13    1.12
  11   2 -15   10.47    1.14
 -11   2  15    8.27    1.12
  10  -2 -15    1.55    0.46
 -10   2  15    2.56    0.47
  10   2 -15    2.25    0.43
  -9  -2  15    2.02    0.40
   9  -2 -15    1.97    0.49
  -9   2  15    2.21    0.44
   9   2 -15    2.47    0.45
  -8  -2  15    4.77    0.60
   8  -2 -15    4.48    0.78
   8  -2 -15    4.20    0.54
   8   2 -15    4.30    0.65
  -8   2  15    4.87    0.69
   7  -2 -15   59.45    6.20
  -7  -2  15   58.52    6.24
   7  -2 -15   53.78    6.34
   7   2 -15   71.54    6.28
  -7   2  15   67.85    6.28
  -6  -2  15   25.51    2.31
  -6  -2  15   21.74    2.30
   6  -2 -15   21.45    2.41
   6  -2 -15   23.91    2.26
  -6   2  15   19.11    2.30
   6   2 -15   21.11    2.31
  -5  -2  15   43.39    4.72
   5  -2 -15   43.61    4.69
  -5  -2  15   45.68    4.74
   5  -2 -15   54.83    4.86
   5   2 -15   50.57    4.74
  -5   2  15   46.55    4.74
   4  -2 -15    3.94    0.44
  -4  -2  15    4.01    0.47
   4  -2 -15    3.61    0.61
  -4  -2  15    3.36    0.49
   4   2 -15    4.01    0.48
  -4   2  15    4.91    0.50
   3  -2 -15    3.61    0.51
   3  -2 -15    2.59    0.29
  -3  -2  15    2.08    0.31
  -3  -2  15    2.27    0.38
   3   2 -15    2.88    0.33
  -3   2  15    2.45    0.32
   2  -2 -15    4.23    0.55
  -2  -2  15    4.13    0.46
  -2  -2  15    3.61    0.50
   2  -2 -15    4.18    0.45
  -2   2  15    4.10    0.47
   2   2 -15    3.97    0.47
  -1  -2  15  126.51   11.37
  -1  -2  15  130.76   11.44
   1  -2 -15  103.38   11.44
   1  -2 -15  106.79   11.35
   1   2 -15  115.11   11.37
  -1   2  15  106.49   11.37
   0  -2 -15    1.77    0.34
   0  -2  15    1.58    0.25
   0   2 -15    1.78    0.25
   0   2  15    1.87    0.27
  -1  -2 -15   66.30    6.09
  -1  -2 -15   61.76    6.15
   1  -2  15   62.29    6.09
  -1   2 -15   57.44    6.09
   1   2  15   57.88    6.10
  -2  -2 -15    1.54    0.25
   2  -2  15    1.65    0.25
  -2   2 -15    1.61    0.25
   2   2  15    1.47    0.27
   3  -2  15    7.57    0.80
  -3  -2 -15    7.74    0.81
  -3   2 -15    7.22    0.80
   3   2  15    6.82    0.82
  -4  -2 -15    0.15    0.11
   4  -2  15    0.44    0.13
  -4   2 -15    0.50    0.14
   4   2  15    0.35    0.14
   5  -2  15   48.98    4.82
  -5  -2 -15   48.07    4.84
   5   2  15   45.03    4.86
  -5   2 -15   49.20    4.83
   6  -2  15    8.08    0.94
  -6  -2 -15    8.61    0.98
   6   2  15    9.04    1.01
  -7  -2 -15   35.05    3.48
   7  -2  15   29.86    3.43
   7   2  15   33.30    3.50
  -7   2 -15   37.56    3.49
   8  -2  15    0.07    0.14
  -8  -2 -15    0.08    0.18
   8   2  15    0.44    0.23
  -8   2 -15    0.28    0.18
  -9  -2 -15    6.27    0.83
   9   2  15    6.37    0.93
  -9   2 -15    6.00    0.90
 -10  -2 -15    0.28    0.23
  10   2  15    0.19    0.25
 -10   2 -15    0.29    0.25
  10  -3 -15    2.33    0.60
  10   3 -15    2.66    0.53
 -10   3  15    3.62    0.59
   9  -3 -15   12.63    1.68
  -9  -3  15   11.76    1.50
  -9   3  15   15.17    1.57
   9   3 -15   16.36    1.58
   8  -3 -15    0.22    0.24
  -8  -3  15    0.50    0.18
  -8   3  15    0.46    0.20
   8   3 -15    0.06    0.14
   7  -3 -15    2.86    0.60
  -7  -3  15    2.55    0.42
   7   3 -15    2.95    0.48
  -7   3  15    3.18    0.49
   6  -3 -15    2.96    0.60
  -6  -3  15    2.78    0.36
  -6  -3  15    3.03    0.48
   6   3 -15    2.61    0.43
  -6   3  15    2.17    0.40
  -5  -3  15   12.27    1.31
   5  -3 -15   13.05    1.44
  -5  -3  15   11.75    1.24
  -5   3  15    9.55    1.25
   5   3 -15   13.68    1.29
  -4  -3  15    3.65    0.43
   4  -3 -15    4.31    0.68
  -4  -3  15    4.62    0.53
  -4   3  15    3.42    0.45
   4   3 -15    3.34    0.46
  -3  -3  15   44.17    4.36
  -3  -3  15   42.21    4.46
   3  -3 -15   39.83    4.50
  -3   3  15   41.26    4.38
   3   3 -15   50.42    4.41
  -2  -3  15    2.90    0.30
   2  -3 -15    3.06    0.51
  -2  -3  15    3.26    0.48
  -2   3  15    2.28    0.32
   2   3 -15    2.46    0.33
  -1  -3  15   38.57    4.35
   1  -3 -15   50.71    4.41
   1   3 -15   39.30    4.26
  -1   3  15   43.78    4.27
   0  -3 -15   12.04    1.39
   0  -3  15   15.33    1.42
   0   3  15   12.90    1.31
   0   3 -15   11.44    1.29
   1  -3  15   16.73    1.49
  -1  -3 -15   12.82    1.45
  -1   3 -15   13.20    1.37
   1   3  15   11.92    1.38
  -2  -3 -15    4.59    0.48
   2  -3  15    4.51    0.58
  -2  -3 -15    4.45    0.57
   2   3  15    4.36    0.53
  -2   3 -15    4.50    0.51
  -3  -3 -15  107.54   10.15
   3  -3  15   84.57   10.21
  -3  -3 -15  116.89   10.23
   3   3  15   92.10   10.19
  -3   3 -15  109.29   10.17
  -4  -3 -15    8.75    1.02
  -4  -3 -15    9.64    1.00
   4  -3  15    8.51    1.06
   4   3  15    8.86    1.04
  -4   3 -15   10.59    1.02
   5  -3  15    3.24    0.52
  -5  -3 -15    3.14    0.42
   5   3  15    3.13    0.53
  -5   3 -15    3.48    0.48
  -6  -3 -15   11.73    1.35
   6  -3  15   13.66    1.41
   6   3  15   13.21    1.42
  -6   3 -15   11.93    1.36
  -7  -3 -15   11.04    1.28
   7  -3  15   11.26    1.32
  -7   3 -15   12.79    1.33
   7   3  15   12.01    1.36
  -8   3 -15    0.67    0.26
   8   3  15    0.77    0.30
   9   3  15    7.59    1.17
  -9   3 -15    9.44    1.08
  10   3  15    2.01    0.56
 -10   3 -15    1.72    0.49
   9  -4 -15    1.14    0.43
   9   4 -15    1.65    0.38
  -9   4  15    1.08    0.37
   8  -4 -15    1.96    0.53
   8   4 -15    1.80    0.39
  -8   4  15    1.58    0.54
   7  -4 -15   22.37    2.58
   7   4 -15   22.82    2.39
  -6  -4  15   16.68    1.90
   6  -4 -15   16.91    2.03
   6   4 -15   18.27    1.86
  -5  -4  15   24.36    2.63
   5  -4 -15   23.44    2.70
   5   4 -15   25.62    2.56
   4  -4 -15    0.66    0.30
  -4  -4  15    0.49    0.22
   4   4 -15    0.61    0.18
   3  -4 -15    2.39    0.54
  -3  -4  15    2.53    0.49
   3   4 -15    3.21    0.43
  -2  -4  15   16.25    1.85
   2  -4 -15   18.16    1.92
   2   4 -15   15.56    1.74
  -2   4  15   18.31    1.78
   1  -4 -15   15.50    1.76
  -1  -4  15   14.13    1.71
   1   4 -15   17.68    1.62
  -1   4  15   14.64    1.60
   0  -4  15    9.40    1.38
   0  -4 -15   16.38    1.48
   0   4  15   13.42    1.30
   0   4 -15   11.86    1.29
  -1  -4 -15   11.16    1.37
   1  -4  15   13.94    1.41
  -1   4 -15   11.87    1.25
   1   4  15   12.09    1.27
   2  -4  15    0.49    0.23
  -2  -4 -15    0.48    0.20
   2   4  15    0.50    0.16
  -2   4 -15    0.55    0.13
   3  -4  15    4.93    0.73
  -3  -4 -15    5.42    0.63
  -3   4 -15    4.04    0.52
   3   4  15    4.44    0.56
   4  -4  15    0.84    0.28
   4   4  15    0.72    0.22
  -4   4 -15    0.76    0.18
   5  -4  15   31.76    3.14
   5   4  15   27.05    3.07
  -5   4 -15   30.32    3.03
   6  -4  15    7.53    0.92
  -6   4 -15    6.60    0.83
   6   4  15    7.62    0.90
   7  -4  15   16.38    1.85
  -7   4 -15   14.94    1.77
   7   4  15   19.00    1.88
   8   4  15    0.72    0.27
  -8   4 -15    0.83    0.28
  -9   4 -15    1.09    0.34
   9   4  15    0.90    0.34
   8  -5 -15    7.54    1.23
   8   5 -15    6.96    0.89
   7  -5 -15    3.33    0.72
   7   5 -15    2.11    0.44
  -6  -5  15    3.04    0.64
   6  -5 -15    4.64    0.83
   6   5 -15    3.89    0.58
   5  -5 -15   16.73    2.08
  -5  -5  15   18.28    1.98
   4  -5 -15    5.41    0.95
  -4  -5  15    5.84    0.90
  -3  -5  15   17.11    2.01
   3  -5 -15   19.25    2.11
  -2  -5  15    6.55    0.85
   2  -5 -15    5.90    0.97
   1  -5 -15    3.15    0.60
  -1  -5  15    2.72    0.56
   0  -5  15    0.49    0.25
   0  -5 -15    0.88    0.29
  -1  -5 -15    5.02    0.73
   1  -5  15    3.34    0.66
  -2  -5 -15    5.64    0.79
   2  -5  15    6.75    0.86
   3  -5  15   34.30    3.64
   4  -5  15    6.60    0.89
   5  -5  15    0.77    0.29
   6  -5  15    0.34    0.23
   6   5  15    0.22    0.19
   7  -5  15    3.43    0.65
   7   5  15    1.91    0.47
  -6  -6  15   19.23    2.04
   6  -6 -15   15.82    2.12
  -5  -6  15    4.97    0.83
   5  -6 -15    4.31    0.89
   4  -6 -15    0.60    0.33
  -4  -6  15    0.14    0.22
  -3  -6  15    0.33    0.27
   3  -6 -15    0.65    0.31
  -2  -6  15    9.85    1.17
   2  -6 -15    7.51    1.12
   1  -6 -15   14.94    1.79
  -1  -6  15   14.72    1.74
   0  -6 -15   11.51    1.40
   0  -6  15   11.05    1.39
   1  -6  15    8.13    1.21
  -1  -6 -15   11.58    1.26
   2  -6  15    1.02    0.37
   3  -6  15    0.50    0.27
   4  -6  15    0.30    0.26
   5  -6  15    6.62    1.03
   6  -6  15   15.75    1.87
   2  -7 -15    6.53    1.12
  -2  -7  15    6.89    1.10
   1  -7 -15    1.50    0.48
  -1  -7  15    1.67    0.53
   0  -7  15    0.33    0.29
   1  -7  15    3.92    0.81
   2  -7  15   12.27    1.57
  11   0 -16    3.32    0.55
 -10   0  16   30.29    3.29
  10   0 -16   32.52    3.28
   9   0 -16    0.03    0.12
  -9   0  16    0.13    0.16
   8   0 -16    7.41    0.91
  -8   0  16    8.86    0.96
   8   0 -16    7.83    0.97
  -7   0  16    0.46    0.17
   7   0 -16    0.16    0.12
   7   0 -16    0.16    0.16
  -6   0  16    3.24    0.48
   6   0 -16    3.24    0.41
   6   0 -16    2.89    0.49
   5   0 -16    0.09    0.10
  -5   0  16    0.05    0.05
   5   0 -16   -0.05    0.06
  -5   0  16    0.01    0.08
  -4   0  16   79.04    8.00
   4   0 -16   81.35    7.99
   3   0 -16   -0.02    0.05
  -3   0  16   -0.03    0.05
  -2   0  16  175.18   20.00
   2   0 -16  228.97   20.00
   1   0 -16    0.02    0.05
  -1   0  16    0.06    0.07
   0   0  16    2.39    0.30
   0   0 -16    2.03    0.30
  -1   0 -16    0.09    0.06
   1   0  16    0.07    0.07
  -2   0 -16  136.51   14.43
   2   0  16  154.77   14.45
  -3   0 -16   -0.05    0.06
   3   0  16    0.00    0.07
   4   0  16   40.17    4.08
  -5   0 -16    0.18    0.11
   5   0  16    0.22    0.13
   6   0  16    1.85    0.38
  -6   0 -16    2.06    0.38
   7   0  16   -0.03    0.13
  -7   0 -16    0.32    0.17
  -8   0 -16   17.72    1.89
   8   0  16   16.81    1.89
  -9   0 -16    0.16    0.18
   9   0  16   -0.04    0.16
  10   0  16    6.61    1.01
 -10   0 -16    7.04    0.91
 -11   0 -16    0.33    0.26
  11   0  16    0.10    0.24
 -11  -1  16    0.26    0.19
  11  -1 -16    1.36    0.26
 -11   1  16    0.34    0.22
  11   1 -16    0.42    0.21
 -10  -1  16    0.65    0.24
  10  -1 -16    0.50    0.21
  10   1 -16    0.42    0.22
 -10   1  16    0.47    0.23
   9  -1 -16    1.60    0.44
   9   1 -16    2.67    0.44
  -9   1  16    2.57    0.47
   8  -1 -16   15.09    1.43
   8  -1 -16   11.37    1.50
  -8  -1  16   11.44    1.43
   8   1 -16   15.20    1.45
  -8   1  16   12.50    1.45
  -7  -1  16    4.15    0.55
   7  -1 -16    3.74    0.44
   7  -1 -16    2.76    0.55
   7   1 -16    2.91    0.48
   7   1 -16    2.99    0.50
  -7   1  16    3.43    0.53
   6  -1 -16  107.42   10.11
  -6  -1  16   94.81   10.13
   6  -1 -16   96.76   10.20
   6   1 -16   95.68   10.12
   6   1 -16  112.96   10.17
  -5  -1  16    9.62    1.16
  -5  -1  16   10.37    1.14
   5  -1 -16    9.29    1.21
   5  -1 -16   11.74    1.15
  -5   1  16   11.45    1.18
   5   1 -16   12.58    1.18
  -4  -1  16   41.97    4.01
   4  -1 -16   38.51    4.08
  -4  -1  16   36.68    4.01
   4   1 -16   36.73    4.01
  -4   1  16   45.68    4.04
   3  -1 -16    0.10    0.07
  -3  -1  16    0.03    0.07
   3  -1 -16    0.19    0.12
   3   1 -16    0.00    0.06
  -3   1  16   -0.01    0.06
   2  -1 -16  106.85   10.37
  -2  -1  16  103.18   10.38
   2   1 -16  103.48   10.37
   1  -1 -16    4.11    0.48
  -1  -1  16    4.84    0.50
   1   1 -16    3.46    0.47
  -1   1  16    5.16    0.50
   0  -1  16   73.69    8.69
   0  -1 -16   99.61    8.70
   0   1 -16   79.34    8.69
   0   1  16   98.32    8.72
   1  -1  16    3.31    0.41
  -1  -1 -16    3.47    0.41
   1   1  16    3.37    0.42
  -1   1 -16    3.53    0.40
   2  -1  16    0.50    0.14
  -2  -1 -16    0.50    0.13
  -2   1 -16    0.53    0.14
   2   1  16    0.24    0.12
  -3  -1 -16    0.24    0.10
   3  -1  16    0.43    0.14
   3   1  16    0.29    0.11
  -3   1 -16    0.37    0.12
   4  -1  16   41.72    4.25
  -4  -1 -16   41.89    4.25
   4   1  16   42.40    4.27
   5  -1  16    0.06    0.11
  -5  -1 -16    0.30    0.14
   5   1  16    0.35    0.16
  -5   1 -16    0.16    0.12
  -6  -1 -16   25.57    3.07
   6  -1  16   36.28    3.11
  -6   1 -16   26.64    3.07
   6   1  16   32.17    3.11
   7  -1  16    1.25    0.31
  -7  -1 -16    1.55    0.34
  -7   1 -16    1.22    0.29
   7   1  16    1.18    0.30
  -8  -1 -16   11.61    1.38
   8  -1  16   11.32    1.37
   8   1  16   13.63    1.42
  -8   1 -16   12.50    1.39
  -9  -1 -16    0.42    0.20
   9  -1  16    0.55    0.23
  -9   1 -16    0.46    0.23
   9   1  16    1.28    0.33
 -10  -1 -16    2.33    0.51
  10  -1  16    3.13    0.57
  10   1  16    2.52    0.54
 -10   1 -16    2.70    0.55
 -11  -1 -16    0.50    0.29
  11  -1  16    0.67    0.34
 -11   1 -16    0.70    0.35
  11   1  16    0.96    0.36
 -11  -2  16    3.38    0.65
  11   2 -16    3.96    0.66
 -11   2  16    4.82    0.71
  10  -2 -16   20.53    2.09
 -10  -2  16   18.98    1.94
  10   2 -16   17.02    1.92
 -10   2  16   15.30    1.93
   9  -2 -16    1.71    0.44
  -9  -2  16    1.42    0.32
  -9   2  16    1.08    0.32
   9   2 -16    1.60    0.35
   8  -2 -16    8.08    1.09
  -8  -2  16    7.98    0.98
   8   2 -16    8.72    0.99
  -8   2  16    9.26    1.01
   7  -2 -16    0.87    0.32
  -7  -2  16    0.93    0.22
   7  -2 -16    0.87    0.18
  -7   2  16    0.77    0.24
   7   2 -16    1.14    0.26
   6  -2 -16    5.39    0.62
   6  -2 -16    5.33    0.84
  -6  -2  16    5.54    0.67
  -6  -2  16    6.19    0.68
  -6   2  16    5.92    0.69
   6   2 -16    5.61    0.67
  -5  -2  16    3.70    0.46
   5  -2 -16    3.33    0.61
  -5  -2  16    3.26    0.46
   5  -2 -16    3.77    0.42
   5   2 -16    3.47    0.46
  -5   2  16    4.41    0.48
  -4  -2  16   82.17    7.65
  -4  -2  16   71.42    7.61
   4  -2 -16   79.76    7.58
  -4   2  16   78.14    7.62
   4   2 -16   70.50    7.61
  -3  -2  16    4.56    0.62
   3  -2 -16    5.18    0.68
   3  -2 -16    5.19    0.57
  -3  -2  16    5.67    0.60
   3   2 -16    5.97    0.61
  -3   2  16    5.22    0.60
  -2  -2  16   78.97    7.10
   2  -2 -16   76.34    7.16
   2  -2 -16   67.38    7.03
  -2  -2  16   69.63    7.05
  -2   2  16   66.71    7.05
   2   2 -16   67.86    7.05
  -1  -2  16    6.43    0.70
   1  -2 -16    8.54    0.82
  -1  -2  16    5.09    0.73
   1  -2 -16    6.13    0.69
   1   2 -16    6.78    0.70
  -1   2  16    6.93    0.72
   0  -2 -16   21.16    2.05
   0  -2 -16   21.25    1.96
   0  -2  16   19.86    1.97
   0   2 -16   17.25    1.96
   0   2  16   17.61    1.97
   1  -2  16    0.23    0.09
  -1  -2 -16    0.21    0.08
  -1   2 -16    0.15    0.07
   1   2  16    0.11    0.08
  -2  -2 -16   79.23    7.30
   2  -2  16   69.81    7.29
   2   2  16   75.71    7.32
  -2   2 -16   68.67    7.29
  -3  -2 -16    3.34    0.43
   3  -2  16    3.84    0.43
  -3   2 -16    3.25    0.42
   3   2  16    3.68    0.46
   4  -2  16   36.07    3.56
  -4  -2 -16   38.56    3.58
  -4   2 -16   35.85    3.56
   4   2  16   30.06    3.58
   5  -2  16    0.54    0.16
  -5  -2 -16    0.48    0.17
   5   2  16    0.75    0.22
  -5   2 -16    0.46    0.16
  -6  -2 -16   11.07    1.12
   6  -2  16    8.70    1.06
   6   2  16    9.72    1.12
   7  -2  16    1.09    0.26
  -7  -2 -16    1.24    0.30
  -7   2 -16    1.43    0.30
   7   2  16    0.82    0.26
  -8  -2 -16   15.08    1.65
   8  -2  16   14.96    1.76
   8   2  16   14.66    1.68
  -8   2 -16   14.62    1.66
  -9  -2 -16    4.32    0.72
   9   2  16    4.23    0.75
  -9   2 -16    4.90    0.77
 -10  -2 -16   10.79    1.24
  10   2  16    9.24    1.24
 -10   2 -16    8.93    1.24
  10  -3 -16    2.58    0.65
  10   3 -16    2.98    0.55
 -10   3  16    2.95    0.55
   9  -3 -16    0.45    0.32
  -9   3  16    1.38    0.31
   9   3 -16    0.90    0.29
  -8  -3  16    5.55    0.76
   8  -3 -16    7.33    0.97
   8   3 -16    6.64    0.81
  -8   3  16    7.57    0.83
   7  -3 -16    1.06    0.37
  -7  -3  16    0.90    0.23
  -7   3  16    0.68    0.24
   7   3 -16    1.20    0.28
  -6  -3  16   48.86    4.48
  -6  -3  16   43.36    4.41
   6  -3 -16   39.56    4.56
  -6   3  16   47.38    4.44
   6   3 -16   39.09    4.42
   5  -3 -16    3.45    0.63
  -5  -3  16    3.25    0.52
  -5  -3  16    3.21    0.41
  -5   3  16    3.31    0.49
   5   3 -16    3.52    0.50
  -4  -3  16    2.24    0.31
   4  -3 -16    1.96    0.44
  -4  -3  16    2.36    0.40
  -4   3  16    2.17    0.34
   4   3 -16    1.94    0.33
  -3  -3  16    7.23    0.82
   3  -3 -16    6.10    0.86
  -3  -3  16    6.29    0.72
   3   3 -16    7.48    0.76
  -3   3  16    6.98    0.75
   2  -3 -16   68.32    6.54
  -2  -3  16   64.07    6.38
  -2  -3  16   61.09    6.49
   2   3 -16   61.66    6.41
  -2   3  16   66.56    6.41
   1  -3 -16    2.25    0.43
  -1  -3  16    2.35    0.43
  -1  -3  16    2.31    0.26
  -1   3  16    2.36    0.30
   1   3 -16    2.41    0.30
   0  -3  16   76.31    9.11
   0  -3 -16  107.14    9.18
   0   3 -16   90.49    9.04
   0   3  16   91.46    9.05
   1  -3  16   21.76    2.41
  -1  -3 -16   24.58    2.43
   1   3  16   24.34    2.35
  -1   3 -16   21.63    2.33
  -2  -3 -16    0.58    0.18
  -2  -3 -16    0.74    0.13
   2  -3  16    0.52    0.20
   2   3  16    0.68    0.18
  -2   3 -16    0.96    0.17
   3  -3  16    0.26    0.14
  -3  -3 -16    0.16    0.12
  -3  -3 -16    0.28    0.10
   3   3  16    0.22    0.12
  -3   3 -16    0.28    0.11
  -4  -3 -16   22.79    2.41
   4  -3  16   21.15    2.44
  -4  -3 -16   23.02    2.38
   4   3  16   23.85    2.43
  -4   3 -16   25.46    2.40
  -5  -3 -16    6.73    0.80
   5  -3  16    6.76    0.85
  -5   3 -16    8.78    0.83
   5   3  16    6.20    0.84
  -6  -3 -16   10.57    1.22
   6  -3  16   10.52    1.26
   6   3  16   11.60    1.29
  -6   3 -16   12.12    1.25
  -7  -3 -16    6.91    0.76
   7  -3  16    5.57    0.76
  -7   3 -16    5.52    0.75
   7   3  16    6.30    0.89
   8   3  16    3.06    0.61
  -8   3 -16    3.50    0.58
   9   3  16    0.80    0.32
  -9   3 -16    0.59    0.26
 -10   3 -16    5.02    0.85
  10   3  16    5.55    0.89
   9  -4 -16    3.82    0.87
   9   4 -16    5.42    0.81
  -9   4  16    6.44    0.88
   8  -4 -16    7.18    1.11
  -8   4  16    6.56    0.87
   8   4 -16    5.97    0.80
   7  -4 -16    0.14    0.24
   7   4 -16    0.12    0.16
   6  -4 -16    0.46    0.28
  -6  -4  16    0.27    0.19
   6   4 -16    0.12    0.14
   5  -4 -16    0.71    0.32
  -5  -4  16    0.90    0.28
   5   4 -16    0.96    0.24
   4  -4 -16   17.41    2.15
  -4  -4  16   17.95    2.07
   4   4 -16   21.23    2.01
   3  -4 -16   -0.14    0.11
  -3  -4  16    0.12    0.15
   3   4 -16    0.19    0.11
  -2  -4  16   34.48    3.06
   2  -4 -16   27.04    3.05
   2   4 -16   29.04    2.90
  -2   4  16   25.87    2.90
   1  -4 -16    0.31    0.20
  -1  -4  16    0.29    0.18
  -1   4  16    0.11    0.10
   1   4 -16    0.23    0.10
   0  -4  16    2.71    0.50
   0  -4 -16    3.13    0.54
   0   4  16    2.86    0.36
   0   4 -16    2.65    0.34
   1  -4  16    2.94    0.56
  -1  -4 -16    4.01    0.60
   1   4  16    3.67    0.43
  -1   4 -16    3.22    0.40
  -2  -4 -16   39.91    3.81
   2  -4  16   33.93    3.81
   2   4  16   39.13    3.73
  -2   4 -16   34.17    3.68
  -3  -4 -16   27.93    2.55
   3  -4  16   21.86    2.55
  -3   4 -16   24.47    2.44
   3   4  16   21.56    2.47
   4  -4  16   14.46    1.48
   4   4  16   12.21    1.38
  -4   4 -16   12.01    1.33
   5  -4  16    2.44    0.51
   5   4  16    2.86    0.50
  -5   4 -16    3.01    0.43
   6  -4  16    1.76    0.42
  -6   4 -16    2.34    0.39
   6   4  16    2.28    0.44
   7  -4  16    8.72    1.02
   7   4  16    7.02    1.00
  -8   4 -16   16.55    1.89
   8   4  16   17.47    1.92
  -9   4 -16    5.63    0.87
   9   4  16    6.35    0.93
   8  -5 -16    3.62    0.83
   8   5 -16    4.52    0.69
   7  -5 -16    5.97    1.03
   7   5 -16    5.47    0.73
  -6  -5  16   20.01    1.98
   6  -5 -16   16.07    2.05
   6   5 -16   15.96    1.83
   5  -5 -16    6.96    1.10
  -5  -5  16    6.40    0.95
   5   5 -16    6.26    0.81
  -4  -5  16    4.87    0.80
   4  -5 -16    5.36    0.93
   3  -5 -16    1.36    0.40
  -3  -5  16    1.36    0.38
  -2  -5  16    6.03    0.97
   2  -5 -16    7.39    0.96
   1  -5 -16    8.68    1.08
  -1  -5  16    7.28    1.01
   0  -5  16   26.45    3.19
   0  -5 -16   33.94    3.24
  -1  -5 -16    5.06    0.83
   1  -5  16    6.22    0.90
  -2  -5 -16    0.11    0.16
   2  -5  16   -0.01    0.16
   3  -5  16    0.07    0.17
   4  -5  16    5.22    0.84
   5  -5  16    2.44    0.51
   6  -5  16   11.31    1.38
   6   5  16   11.71    1.34
   7  -5  16    3.77    0.67
   7   5  16    3.28    0.63
   6  -6 -16    0.54    0.37
  -6  -6  16    1.18    0.39
  -5  -6  16    3.82    0.74
   5  -6 -16    3.81    0.82
   4  -6 -16    6.59    1.10
  -4  -6  16    6.47    1.02
  -3  -6  16    8.44    1.20
   3  -6 -16   10.46    1.30
   2  -6 -16    6.11    1.11
  -2  -6  16    9.05    1.09
   1  -6 -16    0.50    0.29
  -1  -6  16    0.62    0.29
   0  -6 -16    0.74    0.35
   0  -6  16    0.48    0.28
  -1  -6 -16    3.17    0.70
   1  -6  16    3.12    0.65
   2  -6  16   21.43    2.43
   3  -6  16   16.48    1.93
   4  -6  16    6.68    1.06
   5  -6  16    2.16    0.53
   2  -7 -16    4.11    0.84
  -2  -7  16    4.23    0.82
   1  -7 -16   11.55    1.48
  -1  -7  16   11.33    1.49
   0  -7  16    7.87    1.25
   1  -7  16    3.19    0.72
  11   0 -17    9.81    1.12
 -11   0  17    8.84    1.12
 -10   0  17    0.14    0.17
  -9   0  17    2.29    0.44
   9   0 -17    2.34    0.42
   8   0 -17    0.24    0.14
  -8   0  17   -0.06    0.11
   8   0 -17   -0.03    0.14
   7   0 -17  169.93   15.72
  -7   0  17  139.90   15.65
   7   0 -17  162.71   15.64
   6   0 -17   -0.05    0.07
   6   0 -17    0.07    0.11
  -6   0  17    0.02    0.09
   5   0 -17   36.71    3.91
   5   0 -17   40.52    3.87
  -5   0  17   37.31    3.88
  -4   0  17    0.08    0.08
   4   0 -17    0.01    0.06
   3   0 -17   31.53    2.81
  -3   0  17   24.06    2.81
  -2   0  17    0.18    0.10
  -1   0  17   42.77    4.13
   1   0 -17   39.43    4.10
   0   0  17    0.18    0.08
   0   0 -17    0.17    0.07
  -1   0 -17    0.55    0.13
   1   0  17    0.17    0.11
   2   0  17    0.13    0.09
  -2   0 -17    0.13    0.08
   3   0  17    8.53    1.03
  -3   0 -17   10.32    1.03
   4   0  17    0.09    0.09
  -4   0 -17    0.25    0.11
   5   0  17   31.21    3.07
  -5   0 -17   28.34    3.05
  -6   0 -17   -0.09    0.08
   6   0  17   -0.13    0.12
  -7   0 -17   19.44    2.28
   7   0  17   23.80    2.30
   8   0  17    0.42    0.20
  -8   0 -17    0.26    0.19
   9   0  17   -0.24    0.16
  -9   0 -17    0.06    0.18
 -10   0 -17    0.09    0.19
  10   0  17    0.29    0.24
  11  -1 -17    9.38    1.05
 -11  -1  17    8.79    1.10
  11   1 -17    8.79    1.07
 -11   1  17    9.15    1.12
  10  -1 -17    1.05    0.28
 -10  -1  17    0.96    0.31
 -10   1  17    1.55    0.37
  10   1 -17    1.17    0.32
  -9  -1  17   59.36    5.74
   9  -1 -17   53.91    5.69
   9  -1 -17   57.69    5.82
  -9   1  17   54.22    5.74
   9   1 -17   57.20    5.72
   8  -1 -17    2.95    0.55
   8  -1 -17    2.81    0.42
  -8   1  17    2.24    0.44
   8   1 -17    2.45    0.43
   7  -1 -17   11.56    1.12
   7  -1 -17    9.17    0.97
  -7  -1  17    8.71    1.01
  -7   1  17    7.81    1.00
   7   1 -17    9.76    1.03
   7   1 -17    7.09    0.97
  -6  -1  17    0.64    0.19
   6  -1 -17    0.58    0.22
   6  -1 -17    0.60    0.15
   6   1 -17    0.29    0.15
  -6   1  17    0.37    0.18
   6   1 -17    0.62    0.17
  -5  -1  17   77.45    7.43
   5  -1 -17   78.76    7.42
   5  -1 -17   82.06    7.54
  -5  -1  17   62.78    7.43
  -5   1  17   72.20    7.45
   4  -1 -17    9.55    0.94
  -4  -1  17    7.57    0.83
   4  -1 -17    7.49    0.82
  -4  -1  17    7.24    0.84
  -4   1  17    7.35    0.85
   4   1 -17    7.45    0.84
   3  -1 -17   32.59    3.52
  -3  -1  17   33.14    3.46
   3  -1 -17   37.05    3.45
  -3   1  17   34.90    3.47
   3   1 -17   33.38    3.46
  -2  -1  17    0.27    0.11
   2  -1 -17    0.57    0.12
  -2   1  17    0.49    0.13
   2   1 -17    0.40    0.12
   1  -1 -17    0.88    0.17
  -1  -1  17    0.94    0.18
   1   1 -17    0.82    0.17
  -1   1  17    1.10    0.19
   0  -1  17    3.36    0.44
   0  -1 -17    3.54    0.43
   0   1 -17    4.76    0.45
   0   1  17    3.47    0.45
   1  -1  17   57.72    5.50
  -1  -1 -17   59.80    5.49
  -1   1 -17   49.84    5.48
   1   1  17   52.56    5.50
   2  -1  17    0.47    0.14
  -2  -1 -17    0.73    0.16
   2   1  17    0.39    0.14
  -2   1 -17    0.61    0.15
   3  -1  17   90.93    9.13
  -3   1 -17   92.15    9.12
  -4  -1 -17    3.44    0.46
   4  -1  17    3.84    0.47
   4   1  17    3.87    0.49
  -4   1 -17    3.42    0.46
   5  -1  17   19.51    2.14
  -5  -1 -17   19.30    2.13
   5   1  17   20.06    2.16
  -5   1 -17   22.75    2.15
   6  -1  17    0.17    0.13
  -6  -1 -17    0.40    0.17
  -6   1 -17    0.46    0.16
   6   1  17    0.15    0.13
  -7  -1 -17   29.36    3.25
   7  -1  17   34.54    3.26
   7   1  17   28.97    3.25
  -7   1 -17   32.05    3.25
   8  -1  17    0.06    0.16
  -8  -1 -17    0.26    0.19
   8   1  17   -0.07    0.13
  -8   1 -17    0.05    0.16
   9  -1  17   24.07    3.02
  -9  -1 -17   34.97    3.11
   9   1  17   25.04    3.07
  -9   1 -17   33.17    3.09
  10  -1  17    2.97    0.55
 -10  -1 -17    1.93    0.50
 -10   1 -17    3.33    0.59
  10   1  17    3.16    0.59
 -11  -2  17    3.76    0.69
 -11   2  17    5.87    0.82
  11   2 -17    4.94    0.75
  10  -2 -17    0.36    0.30
   9  -2 -17    7.08    0.99
  -9  -2  17    6.44    0.85
  -9   2  17    8.43    0.91
   9   2 -17    6.63    0.85
  -8  -2  17    2.28    0.42
   8  -2 -17    2.25    0.54
  -8   2  17    2.92    0.48
   8   2 -17    1.87    0.38
   7  -2 -17   23.74    2.99
   7  -2 -17   29.44    2.85
  -7  -2  17   29.63    2.91
  -7   2  17   34.54    2.95
   7   2 -17   23.42    2.88
  -6  -2  17    0.18    0.14
   6  -2 -17    0.06    0.08
   6  -2 -17    0.11    0.16
  -6  -2  17    0.04    0.09
  -6   2  17    0.09    0.11
   6   2 -17    0.09    0.11
  -5  -2  17   20.38    1.85
   5  -2 -17   15.37    1.92
   5  -2 -17   17.88    1.80
  -5  -2  17   18.24    1.86
   5   2 -17   16.82    1.83
  -5   2  17   16.45    1.84
  -4  -2  17    0.10    0.08
   4  -2 -17    0.25    0.08
  -4  -2  17    0.22    0.12
   4  -2 -17    0.15    0.14
  -4   2  17    0.08    0.10
   4   2 -17    0.08    0.09
   3  -2 -17    7.83    1.00
   3  -2 -17    8.64    0.89
  -3  -2  17    7.37    0.94
  -3  -2  17    9.27    0.92
   3   2 -17   10.70    0.94
  -3   2  17    7.25    0.91
   2  -2 -17   -0.02    0.10
  -2  -2  17    0.07    0.07
   2  -2 -17    0.11    0.06
  -2  -2  17    0.01    0.09
   2   2 -17    0.00    0.06
  -2   2  17    0.03    0.06
   1  -2 -17   73.69    6.82
   1  -2 -17   65.56    6.71
  -1  -2  17   65.85    6.72
   1   2 -17   61.64    6.71
  -1   2  17   71.95    6.73
   0  -2  17   29.94    2.72
   0  -2 -17   26.17    2.70
   0   2 -17   27.19    2.71
   0   2  17   24.07    2.72
   1  -2  17   15.92    1.62
  -1  -2 -17   15.43    1.61
   1   2  17   14.99    1.63
  -1   2 -17   16.24    1.61
  -2  -2 -17    7.06    0.77
   2  -2  17    7.06    0.77
  -2   2 -17    7.83    0.78
   2   2  17    6.18    0.78
  -3  -2 -17   15.05    1.37
   3  -2  17   13.65    1.35
   3   2  17    9.91    1.35
  -3   2 -17   12.77    1.35
  -4  -2 -17    2.98    0.44
   4  -2  17    3.15    0.40
   4   2  17    3.36    0.50
  -4   2 -17    2.62    0.42
  -5  -2 -17   27.82    2.77
   5  -2  17   26.74    2.75
   5   2  17   26.65    2.79
  -5   2 -17   25.93    2.75
   6  -2  17    0.43    0.16
  -6  -2 -17    0.56    0.20
   6   2  17    0.25    0.18
   7  -2  17   20.47    1.88
  -7  -2 -17   15.90    1.89
  -7   2 -17   16.21    1.88
   7   2  17   17.53    1.92
  -8  -2 -17    0.46    0.22
  -8   2 -17    0.26    0.17
   8   2  17    0.78    0.25
  -9  -2 -17    0.64    0.28
   9   2  17    0.55    0.30
  -9   2 -17    0.97    0.30
 -10  -2 -17    0.41    0.26
  10   2  17    0.21    0.25
 -10   2 -17    0.41    0.29
  10  -3 -17    0.77    0.37
  10   3 -17    1.63    0.38
 -10   3  17    0.63    0.28
   9   3 -17   31.06    3.23
  -9   3  17   30.65    3.24
  -8  -3  17    1.15    0.27
   8  -3 -17    1.31    0.40
   8   3 -17    0.86    0.27
  -8   3  17    1.02    0.29
   7  -3 -17    0.94    0.35
  -7  -3  17    0.49    0.18
  -7   3  17    0.73    0.23
   7   3 -17    0.72    0.23
   6  -3 -17    0.12    0.20
  -6  -3  17    0.53    0.16
  -6  -3  17    0.39    0.20
  -6   3  17    0.67    0.21
   6   3 -17    0.62    0.20
  -5  -3  17   45.28    4.85
   5  -3 -17   49.18    4.96
  -5  -3  17   51.58    4.79
   5   3 -17   46.52    4.81
  -5   3  17   45.70    4.81
   4  -3 -17    7.54    0.86
  -4  -3  17    4.94    0.65
  -4  -3  17    5.45    0.73
   4   3 -17    6.32    0.69
  -4   3  17    6.68    0.69
  -3  -3  17   20.27    2.27
   3  -3 -17   20.35    2.33
  -3  -3  17   21.48    2.19
   3   3 -17   23.98    2.22
  -3   3  17   21.18    2.21
   2  -3 -17   13.67    1.57
  -2  -3  17   12.81    1.52
  -2  -3  17   13.80    1.42
   2   3 -17   14.33    1.45
  -2   3  17   14.47    1.45
  -1  -3  17    0.77    0.14
   1  -3 -17    0.97    0.27
  -1  -3  17    1.07    0.26
   1   3 -17    0.95    0.18
  -1   3  17    1.13    0.20
   0  -3 -17    2.36    0.43
   0  -3  17    2.23    0.40
   0   3  17    2.37    0.31
   0   3 -17    2.17    0.29
  -1  -3 -17   23.05    2.68
   1  -3  17   25.24    2.70
   1   3  17   27.23    2.63
  -1   3 -17   27.14    2.62
  -2  -3 -17   22.13    2.26
   2  -3  17   20.83    2.36
  -2  -3 -17   21.42    2.35
   2   3  17   20.83    2.31
  -2   3 -17   26.32    2.30
  -3  -3 -17   33.46    3.47
   3  -3  17   32.26    3.50
  -3  -3 -17   33.82    3.41
   3   3  17   37.41    3.47
  -3   3 -17   32.68    3.42
   4  -3  17   11.41    1.30
  -4  -3 -17   12.47    1.26
  -4  -3 -17   10.61    1.22
   4   3  17   13.15    1.29
  -4   3 -17   10.64    1.23
  -5  -3 -17    0.36    0.15
   5  -3  17    0.38    0.17
  -5   3 -17    0.31    0.14
   5   3  17    0.19    0.16
  -6  -3 -17    0.65    0.21
   6  -3  17    0.87    0.26
   6   3  17    0.87    0.27
  -6   3 -17    0.99    0.25
   7  -3  17   14.67    1.78
  -7  -3 -17   15.60    1.80
   7   3  17   16.18    1.82
  -7   3 -17   19.07    1.80
  -8   3 -17   14.80    1.60
   8   3  17   13.70    1.63
   9   3  17   23.81    2.60
  -9   3 -17   23.17    2.54
   9  -4 -17    1.92    0.56
  -9   4  17    1.86    0.42
   9   4 -17    2.06    0.43
   8  -4 -17    2.10    0.58
  -8   4  17    2.19    0.48
   8   4 -17    2.44    0.46
   7  -4 -17   27.07    2.70
   7   4 -17   20.27    2.43
  -7   4  17   24.33    2.50
  -6  -4  17    2.91    0.57
   6  -4 -17    3.52    0.71
  -6   4  17    2.41    0.62
   6   4 -17    3.61    0.53
  -5  -4  17   19.34    2.11
   5   4 -17   19.27    2.03
  -4  -4  17    1.68    0.38
   4  -4 -17    2.11    0.50
   4   4 -17    1.71    0.30
  -4   4  17    1.28    0.29
  -3  -4  17   18.22    1.72
  -3   4  17   14.90    1.61
   3   4 -17   13.72    1.58
  -2  -4  17   21.59    2.49
  -2   4  17   21.24    2.38
   2   4 -17   26.98    2.40
   1  -4 -17   37.86    4.38
  -1  -4  17   51.22    4.42
   1   4 -17   42.52    4.25
  -1   4  17   39.91    4.25
   0  -4  17   24.94    2.24
   0  -4 -17   22.46    2.22
   0   4 -17   20.94    2.06
   0   4  17   16.08    2.06
  -1  -4 -17    2.98    0.56
   1  -4  17    3.85    0.63
  -1   4 -17    3.83    0.41
   1   4  17    2.90    0.41
  -2  -4 -17    0.43    0.20
   2  -4  17    0.61    0.23
  -2   4 -17    0.35    0.12
   2   4  17    0.49    0.17
   3  -4  17    0.42    0.24
  -3  -4 -17    1.10    0.28
  -3   4 -17    1.10    0.21
   3   4  17    1.04    0.25
   4  -4  17    8.90    1.01
  -4   4 -17    6.93    0.87
   4   4  17    9.02    0.95
   5  -4  17   30.28    3.37
  -5   4 -17   34.01    3.29
   5   4  17   31.44    3.33
   6  -4  17    7.63    0.99
  -6   4 -17    8.60    0.92
   6   4  17    6.97    0.95
   7   4  17   10.89    1.31
  -8   4 -17    4.03    0.68
   8   4  17    4.96    0.78
   8  -5 -17    1.24    0.46
   8   5 -17    0.71    0.28
   7  -5 -17    0.87    0.40
   7   5 -17    0.30    0.21
  -6  -5  17    7.17    0.93
   6  -5 -17    7.27    1.17
   6   5 -17    6.75    0.84
   5  -5 -17   22.15    2.11
  -5  -5  17   16.19    1.90
   5   5 -17   15.04    1.78
  -4  -5  17   14.57    1.75
   4  -5 -17   16.25    1.86
   3  -5 -17   10.03    1.40
  -3  -5  17   12.65    1.38
  -2  -5  17   10.91    1.53
   2  -5 -17   16.39    1.65
  -1  -5  17    0.16    0.18
   1  -5 -17    0.85    0.31
   0  -5  17    1.86    0.44
   0  -5 -17    1.61    0.42
   1  -5  17    8.11    1.19
  -1  -5 -17   11.96    1.25
   2  -5  17   27.92    2.65
  -2  -5 -17   21.06    2.55
   3  -5  17   33.79    3.60
   4  -5  17   10.97    1.34
   5  -5  17    0.55    0.27
   6  -5  17    1.97    0.46
   6   5  17    1.53    0.39
   7  -5  17    5.78    0.93
   7   5  17    6.37    0.95
   6  -6 -17    3.56    0.85
  -6  -6  17    5.35    0.84
   5  -6 -17    5.77    1.08
  -5  -6  17    7.00    1.04
  -4  -6  17    2.33    0.59
   4  -6 -17    4.50    0.82
  -3  -6  17    1.95    0.52
   3  -6 -17    2.28    0.60
   2  -6 -17    3.76    0.79
  -2  -6  17    6.02    0.91
  -1  -6  17   13.39    1.61
   0  -6  17   11.10    1.49
   0  -6 -17   13.70    1.55
   1  -6  17    3.28    0.70
  -1  -6 -17    3.91    0.80
   2  -6  17    2.11    0.52
   3  -6  17    1.51    0.45
   4  -6  17    6.62    1.04
   5  -6  17    8.68    1.16
   1  -7 -17    0.00    0.25
  -1  -7  17    0.19    0.27
   0  -7  17    0.73    0.40
 -11   0  18   -0.12    0.16
  11   0 -18    0.49    0.22
  10   0 -18   29.84    3.08
 -10   0  18   29.14    3.10
  -9   0  18   -0.01    0.14
   9   0 -18    0.52    0.18
  -8   0  18    2.87    0.47
   8   0 -18    2.16    0.45
   8   0 -18    2.25    0.40
   7   0 -18   -0.02    0.10
   7   0 -18    0.26    0.18
  -7   0  18    1.10    0.22
  -6   0  18    5.19    0.67
   6   0 -18    5.63    0.71
   6   0 -18    5.79    0.65
  -5   0  18    0.07    0.10
   5   0 -18    0.07    0.09
   5   0 -18   -0.09    0.08
   4   0 -18   77.88    6.70
  -4   0  18   56.40    6.70
  -3   0  18    0.05    0.08
   3   0 -18    0.03    0.06
   2   0 -18   14.21    1.49
  -2   0  18   14.69    1.51
  -1   0  18    0.36    0.11
   0   0  18   67.61    7.09
   0   0 -18   74.41    7.08
   1   0  18    0.05    0.08
  -1   0 -18    0.08    0.07
   2   0  18   85.66    7.86
  -2   0 -18   71.95    7.83
   3   0  18   -0.05    0.07
  -3   0 -18    0.10    0.10
  -4   0 -18   18.23    2.03
   4   0  18   20.90    2.06
  -5   0 -18    0.11    0.10
   5   0  18    0.03    0.11
  -6   0 -18    4.37    0.60
   6   0  18    5.01    0.69
   7   0  18   -0.09    0.11
  -7   0 -18    0.04    0.15
  -8   0 -18   40.52    4.50
   8   0  18   47.29    4.53
   9   0  18   -0.08    0.19
  -9   0 -18   -0.23    0.15
  10   0  18   12.61    1.40
 -10   0 -18   10.70    1.37
  11  -1 -18    0.71    0.32
 -11  -1  18    1.00    0.34
  11   1 -18    1.06    0.32
 -11   1  18    3.01    0.46
  10  -1 -18    0.47    0.19
 -10  -1  18    0.03    0.19
 -10   1  18    0.51    0.24
  10   1 -18    0.36    0.20
   9  -1 -18    1.10    0.37
  -9  -1  18    1.36    0.33
   9  -1 -18    1.75    0.30
  -9   1  18    0.96    0.29
   9   1 -18    0.77    0.24
   8  -1 -18   29.85    3.67
   8  -1 -18   34.43    3.57
  -8  -1  18   38.01    3.63
   8   1 -18   40.70    3.62
  -8   1  18   32.28    3.61
   7  -1 -18   13.39    1.31
  -7  -1  18   11.88    1.33
   7  -1 -18   10.87    1.39
  -7   1  18   11.43    1.34
   7   1 -18   11.79    1.32
   7   1 -18   13.43    1.37
  -6  -1  18    3.01    0.48
   6  -1 -18    2.34    0.49
   6  -1 -18    2.71    0.38
   6   1 -18    3.67    0.46
   6   1 -18    2.80    0.44
  -6   1  18    3.50    0.50
   5  -1 -18   11.65    1.09
  -5  -1  18   10.94    1.12
   5  -1 -18   10.04    1.18
  -5  -1  18    9.82    1.09
   5   1 -18   10.58    1.11
  -5   1  18    8.29    1.10
   4  -1 -18    2.42    0.41
  -4  -1  18    2.11    0.32
  -4  -1  18    1.81    0.30
   4  -1 -18    1.83    0.29
   4   1 -18    2.15    0.32
  -4   1  18    1.55    0.30
  -3  -1  18    0.19    0.10
   3  -1 -18    0.10    0.07
   3  -1 -18    0.02    0.10
  -3   1  18    0.21    0.10
   3   1 -18    0.18    0.09
   2  -1 -18   37.67    3.86
  -2  -1  18   40.41    3.88
  -2   1  18   35.65    3.87
   2   1 -18   40.25    3.87
   1  -1 -18    0.81    0.16
  -1  -1  18    0.72    0.16
   1   1 -18    0.75    0.16
  -1   1  18    0.72    0.17
   0  -1  18  130.35   12.94
   0  -1 -18  124.95   12.92
   0   1  18  137.06   12.94
   0   1 -18  129.18   12.92
   1  -1  18    0.26    0.10
  -1  -1 -18    0.06    0.07
  -1   1 -18    0.26    0.09
   1   1  18    0.45    0.14
   2  -1  18    8.22    0.87
  -2  -1 -18    7.61    0.85
  -2   1 -18    7.56    0.85
   2   1  18    7.83    0.87
   3  -1  18    1.10    0.24
  -3   1 -18    1.47    0.26
   3   1  18    1.57    0.28
  -4  -1 -18   78.76    8.37
   4  -1  18   79.82    8.38
   4   1  18   81.70    8.40
  -4   1 -18   95.02    8.39
   5  -1  18    2.37    0.41
  -5  -1 -18    2.59    0.43
   5   1  18    2.30    0.43
  -5   1 -18    2.46    0.41
  -6  -1 -18   42.02    4.39
   6  -1  18   41.86    4.38
   6   1  18   50.62    4.44
  -6   1 -18   38.79    4.38
  -7  -1 -18    0.73    0.24
   7  -1  18    0.60    0.23
  -7   1 -18    0.89    0.25
   7   1  18    0.62    0.25
   8  -1  18    1.28    0.34
  -8  -1 -18    1.33    0.37
   8   1  18    0.81    0.29
  -8   1 -18    1.48    0.38
  -9  -1 -18    0.23    0.20
   9  -1  18    0.68    0.27
  -9   1 -18    0.41    0.22
   9   1  18    0.64    0.27
 -10  -1 -18    7.87    1.05
  10  -1  18    6.59    0.97
 -10   1 -18    6.19    0.99
  10   1  18    7.03    1.05
 -10  -2  18   17.51    2.12
  10  -2 -18   20.89    2.29
  10   2 -18   20.86    2.14
 -10   2  18   20.40    2.17
  -9  -2  18    0.39    0.20
   9  -2 -18    0.28    0.23
   9   2 -18    0.93    0.25
  -9   2  18   -0.06    0.13
  -8  -2  18    3.22    0.50
   8  -2 -18    3.14    0.62
  -8   2  18    2.88    0.51
   8   2 -18    2.75    0.47
   7  -2 -18    0.04    0.17
  -7  -2  18    0.57    0.19
   7  -2 -18    0.16    0.10
   7   2 -18    0.36    0.16
  -7   2  18    0.19    0.15
  -6  -2  18    5.50    0.70
   6  -2 -18    5.91    0.63
   6  -2 -18    5.25    0.83
  -6  -2  18    6.38    0.68
  -6   2  18    4.96    0.67
   6   2 -18    5.15    0.66
  -5  -2  18    1.33    0.27
  -5  -2  18    1.70    0.27
   5  -2 -18    1.08    0.20
   5  -2 -18    1.38    0.36
  -5   2  18    1.30    0.27
   5   2 -18    1.24    0.25
  -4  -2  18   76.14    7.73
   4  -2 -18   77.50    7.70
   4  -2 -18   70.31    7.83
  -4  -2  18   65.93    7.75
  -4   2  18   89.02    7.75
   4   2 -18   85.27    7.74
  -3  -2  18   16.86    1.59
   3  -2 -18   14.89    1.51
  -3  -2  18   14.29    1.53
  -3   2  18   13.92    1.54
   3   2 -18   14.27    1.53
   2  -2 -18    9.87    1.12
   2  -2 -18   11.06    1.24
  -2  -2  18   10.50    1.18
  -2  -2  18   11.00    1.14
   2   2 -18   11.36    1.15
  -2   2  18   11.54    1.15
  -1  -2  18    0.96    0.19
   1  -2 -18    1.10    0.19
   1  -2 -18    1.16    0.28
  -1   2  18    1.37    0.23
   1   2 -18    1.09    0.20
   0  -2 -18    5.89    0.58
   0  -2  18    4.14    0.56
   0  -2 -18    5.79    0.67
   0   2 -18    4.57    0.56
   0   2  18    5.64    0.59
   1  -2  18    2.46    0.33
   1   2  18    2.66    0.35
  -1   2 -18    2.72    0.33
   2  -2  18   56.73    5.39
  -2  -2 -18   54.84    5.39
  -2   2 -18   50.73    5.38
   2   2  18   52.97    5.41
  -3  -2 -18    0.29    0.13
   3  -2  18    0.62    0.15
  -3   2 -18    0.45    0.15
   3   2  18    0.43    0.16
   4  -2  18   65.94    6.41
  -4  -2 -18   64.18    6.42
   4   2  18   69.24    6.46
  -4   2 -18   57.16    6.40
   5  -2  18    1.07    0.24
  -5  -2 -18    1.45    0.28
  -5   2 -18    0.85    0.24
   5   2  18    1.46    0.31
   6  -2  18    4.73    0.60
  -6  -2 -18    4.69    0.61
   6   2  18    4.67    0.71
   7  -2  18    1.05    0.25
  -7  -2 -18    1.09    0.30
  -7   2 -18    0.60    0.23
   7   2  18    0.75    0.27
  -8  -2 -18   40.63    4.43
   8   2  18   37.34    4.46
  -8   2 -18   51.66    4.47
  -9  -2 -18    1.11    0.36
   9   2  18    0.83    0.35
  -9   2 -18    1.04    0.32
 -10  -2 -18    4.77    0.81
 -10   2 -18    5.35    0.85
  10   2  18    4.80    0.83
  10  -3 -18   -0.07    0.22
 -10   3  18   -0.10    0.17
  10   3 -18    0.88    0.28
   9  -3 -18    1.61    0.53
  -9   3  18    1.79    0.43
   9   3 -18    3.99    0.53
  -8  -3  18   28.46    3.04
   8  -3 -18   28.46    3.21
   8   3 -18   31.35    3.07
  -8   3  18   28.96    3.07
  -7  -3  18    4.62    0.60
   7  -3 -18    5.36    0.90
   7   3 -18    4.93    0.64
  -7   3  18    5.42    0.66
   6  -3 -18   23.40    2.14
  -6  -3  18   17.69    1.88
  -6  -3  18   16.55    1.94
   6   3 -18   17.75    1.91
  -6   3  18   17.56    1.91
  -5  -3  18    2.03    0.28
  -5  -3  18    1.33    0.32
   5   3 -18    1.29    0.28
  -5   3  18    1.63    0.30
  -4  -3  18    0.01    0.07
   4  -3 -18   -0.07    0.11
  -4  -3  18    0.04    0.10
  -4   3  18   -0.04    0.08
   4   3 -18    0.01    0.09
  -3  -3  18    0.25    0.17
  -3  -3  18    0.46    0.12
   3  -3 -18    0.34    0.21
  -3   3  18    0.51    0.14
   3   3 -18    0.65    0.16
  -2  -3  18   37.62    3.88
   2  -3 -18   38.12    4.03
  -2   3  18   43.04    3.92
   2   3 -18   36.60    3.90
  -1  -3  18    8.10    0.85
  -1  -3  18    7.66    0.95
   1  -3 -18    8.80    1.00
   1   3 -18    8.33    0.87
  -1   3  18    7.89    0.88
   0  -3 -18   60.91    6.29
   0  -3  18   59.35    6.27
   0   3 -18   61.96    6.19
   0   3  18   65.46    6.21
  -1  -3 -18    0.35    0.17
   1  -3  18    0.20    0.14
  -1   3 -18    0.11    0.09
   1   3  18    0.10    0.10
   2  -3  18    0.15    0.13
  -2  -3 -18    0.03    0.07
  -2  -3 -18    0.00    0.08
   2   3  18    0.03    0.10
  -2   3 -18    0.08    0.08
  -3  -3 -18    5.89    0.63
   3  -3  18    4.90    0.70
  -3  -3 -18    6.18    0.71
   3   3  18    5.08    0.67
  -3   3 -18    5.83    0.64
   4  -3  18   28.50    2.62
  -4  -3 -18   26.33    2.56
  -4  -3 -18   22.38    2.50
   4   3  18   25.12    2.57
  -4   3 -18   22.24    2.52
  -5  -3 -18   16.54    1.98
   5  -3  18   21.94    2.09
   5   3  18   19.85    2.05
  -5   3 -18   19.48    2.01
  -6  -3 -18   26.01    2.69
   6  -3  18   24.79    2.74
  -6   3 -18   25.20    2.70
   6   3  18   28.11    2.77
   7  -3  18    0.49    0.21
  -7   3 -18    0.54    0.21
   7   3  18    0.61    0.25
  -8   3 -18    4.45    0.70
   8   3  18    4.49    0.73
   9   3  18    0.34    0.23
  -9   3 -18    0.50    0.26
   9  -4 -18    2.92    0.70
  -9   4  18    2.15    0.48
   9   4 -18    2.67    0.50
   8  -4 -18    4.05    0.81
  -8   4  18    3.61    0.61
   8   4 -18    3.03    0.56
   7  -4 -18    0.92    0.35
  -7   4  18    0.61    0.25
   7   4 -18    0.86    0.25
   6  -4 -18    7.76    1.04
  -6  -4  18    7.22    0.93
  -6   4  18    7.30    0.89
   6   4 -18    6.86    0.85
  -5  -4  18   11.55    1.25
   5  -4 -18   10.72    1.35
  -5   4  18    8.30    1.15
   5   4 -18   11.64    1.16
   4  -4 -18   23.60    2.55
  -4  -4  18   20.49    2.43
  -4   4  18   25.79    2.38
   4   4 -18   21.10    2.34
  -3  -4  18   25.61    2.80
   3  -4 -18   32.11    2.93
   3   4 -18   25.85    2.69
  -3   4  18   24.38    2.68
   2  -4 -18    4.38    0.79
  -2  -4  18    4.74    0.74
   2   4 -18    5.26    0.59
  -2   4  18    5.19    0.59
  -1  -4  18    5.52    0.70
   1  -4 -18    5.72    0.73
   1   4 -18    4.94    0.57
  -1   4  18    4.44    0.57
   0  -4  18   20.06    1.99
   0  -4 -18   15.00    1.93
   0   4  18   18.50    1.84
   0   4 -18   17.73    1.82
   1  -4  18    6.58    0.94
  -1  -4 -18    9.36    0.98
  -1   4 -18    8.48    0.84
   1   4  18    6.59    0.84
   2  -4  18   60.24    6.05
  -2  -4 -18   57.12    6.01
   2   4  18   63.35    5.95
  -2   4 -18   56.14    5.90
   3  -4  18    1.80    0.41
  -3  -4 -18    1.76    0.37
  -3   4 -18    2.33    0.34
   3   4  18    1.96    0.36
   4  -4  18   28.62    2.58
  -4   4 -18   22.46    2.41
   4   4  18   21.10    2.45
   5  -4  18    0.41    0.19
  -5   4 -18    0.16    0.13
   5   4  18    0.23    0.15
   6  -4  18    0.65    0.26
  -6   4 -18    0.51    0.20
   6   4  18    0.64    0.26
   7  -4  18    2.35    0.52
   7   4  18    3.23    0.58
   8   4  18    5.12    0.82
  -8   4 -18    4.66    0.73
   8  -5 -18   10.77    1.37
   8   5 -18    8.58    1.10
   7  -5 -18   10.99    1.43
   7   5 -18    9.65    1.16
   6  -5 -18    4.66    0.86
  -6  -5  18    2.66    0.56
   6   5 -18    3.06    0.51
   5  -5 -18    3.12    0.72
  -5  -5  18    3.29    0.67
   5   5 -18    3.98    0.55
  -4  -5  18    0.93    0.34
   4  -5 -18    1.14    0.40
   3  -5 -18    0.08    0.20
  -3  -5  18    0.31    0.23
  -2  -5  18    5.99    0.94
   2  -5 -18    6.74    0.92
  -1  -5  18   35.70    4.08
   1  -5 -18   42.70    4.16
   0  -5 -18   25.59    2.71
   0  -5  18   23.54    2.67
  -1  -5 -18    9.50    1.15
   1  -5  18    8.44    1.12
   2  -5  18    0.13    0.18
  -2  -5 -18    0.14    0.18
   3  -5  18    3.26    0.62
   4  -5  18   14.24    1.66
   5  -5  18    2.36    0.53
   6  -5  18    8.23    1.05
   6   5  18    7.53    1.01
   7  -5  18    0.26    0.27
   7   5  18    0.15    0.23
  -5  -6  18    7.88    1.12
   5  -6 -18    6.09    1.13
  -4  -6  18   10.89    1.48
   4  -6 -18   13.72    1.62
   3  -6 -18   21.98    2.32
  -3  -6  18   17.07    2.18
   2  -6 -18    3.02    0.67
  -2  -6  18    3.19    0.66
  -1  -6  18    0.47    0.26
   1  -6 -18    0.67    0.32
   0  -6 -18    4.91    0.81
   0  -6  18    3.28    0.71
   1  -6  18    6.10    0.99
   2  -6  18   10.60    1.36
   3  -6  18    7.10    1.10
   4  -6  18    1.83    0.49
   5  -6  18    0.00    0.21
  11   0 -19    0.92    0.29
 -11   0  19    0.81    0.31
  10   0 -19    0.03    0.14
   9   0 -19   11.27    1.29
  -9   0  19   12.44    1.34
  -8   0  19    0.06    0.13
   8   0 -19    0.02    0.16
   8   0 -19   -0.03    0.11
  -7   0  19   31.53    3.63
   7   0 -19   38.47    3.62
   7   0 -19   36.46    3.70
   6   0 -19    0.02    0.11
  -6   0  19    0.11    0.12
   6   0 -19    0.05    0.08
   5   0 -19   11.97    1.41
   5   0 -19   16.17    1.52
  -5   0  19   13.17    1.44
  -4   0  19    0.05    0.08
   4   0 -19   -0.07    0.06
  -3   0  19   39.95    4.42
   3   0 -19   47.81    4.41
   2   0 -19    0.08    0.07
  -2   0  19   -0.01    0.07
   1   0 -19   93.95    8.55
  -1   0  19   77.72    8.55
   0   0 -19    0.20    0.08
   0   0  19    0.19    0.10
   1   0  19   45.82    4.60
  -1   0 -19   45.45    4.58
  -2   0 -19    0.54    0.14
   2   0  19    0.59    0.16
  -3   0 -19    5.10    0.56
   3   0  19    4.17    0.56
   4   0  19   -0.05    0.08
  -4   0 -19    0.08    0.10
  -5   0 -19   52.83    5.99
   5   0  19   67.04    6.04
  -6   0 -19    0.10    0.12
   6   0  19    0.21    0.16
   7   0  19   12.78    1.41
  -7   0 -19   12.16    1.40
   8   0  19    0.38    0.21
  -8   0 -19    0.63    0.23
  -9   0 -19    9.91    1.24
   9   0  19   10.53    1.26
  10   0  19    0.11    0.24
 -10   0 -19    0.67    0.30
 -11  -1  19    6.42    1.04
  11   1 -19    6.84    0.91
 -11   1  19    8.07    0.94
  10  -1 -19   -0.06    0.13
 -10  -1  19    0.22    0.19
  10   1 -19    0.13    0.16
 -10   1  19    0.03    0.18
   9  -1 -19    8.95    1.08
  -9  -1  19    9.70    1.15
   9  -1 -19   11.80    1.27
   9   1 -19    9.49    1.12
  -9   1  19   10.13    1.16
  -8  -1  19    2.64    0.42
   8  -1 -19    1.92    0.32
   8  -1 -19    1.45    0.41
  -8   1  19    2.20    0.42
   8   1 -19    1.94    0.37
  -7  -1  19    0.58    0.21
   7  -1 -19    0.36    0.20
   7  -1 -19    0.77    0.19
  -7   1  19    1.03    0.26
   7   1 -19    0.61    0.24
   7   1 -19    0.46    0.17
   6  -1 -19    0.03    0.14
  -6  -1  19    0.09    0.12
   6  -1 -19    0.15    0.10
  -6   1  19    0.19    0.13
   6   1 -19    0.01    0.10
  -5  -1  19   66.52    6.13
   5  -1 -19   58.83    6.08
  -5  -1  19   62.05    6.11
   5  -1 -19   53.10    6.18
  -5   1  19   60.07    6.12
   5   1 -19   64.47    6.11
  -4  -1  19    5.77    0.69
   4  -1 -19    5.77    0.68
  -4  -1  19    6.23    0.71
   4   1 -19    7.80    0.72
  -4   1  19    5.62    0.70
   3  -1 -19   95.69    8.73
   3  -1 -19   85.20    8.82
  -3  -1  19   89.66    8.75
   3   1 -19   89.73    8.73
  -3   1  19   77.91    8.73
   2  -1 -19    0.47    0.12
  -2  -1  19    0.54    0.14
  -2   1  19    0.50    0.15
   2   1 -19    0.58    0.14
  -1  -1  19    4.86    0.55
   1  -1 -19    4.22    0.52
   1   1 -19    4.95    0.53
  -1   1  19    4.63    0.54
   0  -1 -19   11.82    1.24
   0   1  19   12.28    1.26
   0   1 -19   11.56    1.24
   1  -1  19  101.90   11.84
  -1  -1 -19  135.43   11.86
  -1   1 -19  117.25   11.84
   1   1  19  123.14   11.87
  -2  -1 -19    0.58    0.17
   2  -1  19    0.86    0.19
   2   1  19    0.54    0.18
  -2   1 -19    0.84    0.18
   3  -1  19   76.86    7.33
  -3   1 -19   69.47    7.31
   3   1  19   73.12    7.33
  -4  -1 -19    0.55    0.16
   4  -1  19    0.21    0.13
  -4   1 -19    0.36    0.13
   4   1  19    0.11    0.10
  -5  -1 -19    0.09    0.13
   5  -1  19    0.05    0.12
   5   1  19    0.16    0.14
  -5   1 -19   -0.04    0.10
  -6  -1 -19    1.66    0.36
   6  -1  19    2.06    0.37
  -6   1 -19    1.55    0.34
   6   1  19    2.59    0.44
   7  -1  19   13.76    1.55
  -7  -1 -19   13.48    1.57
   7   1  19   16.90    1.61
  -7   1 -19   12.69    1.55
  -8  -1 -19    0.04    0.20
   8  -1  19    0.40    0.23
  -8   1 -19    0.38    0.23
   8   1  19    0.37    0.22
   9  -1  19   10.30    1.27
  -9  -1 -19   10.98    1.32
  -9   1 -19    9.75    1.29
   9   1  19   12.62    1.34
  10  -1  19    0.47    0.28
 -10  -1 -19    0.57    0.30
  10   1  19    0.60    0.32
 -10   1 -19    0.14    0.26
  10  -2 -19    0.39    0.29
 -10  -2  19    0.31    0.23
 -10   2  19    0.35    0.23
  -9  -2  19   12.52    1.32
   9  -2 -19   12.48    1.45
  -9   2  19   12.69    1.33
   9   2 -19    9.06    1.27
  -8  -2  19    2.00    0.39
   8  -2 -19    1.70    0.47
   8   2 -19    1.90    0.37
  -8   2  19    1.97    0.41
   7  -2 -19   40.12    4.06
  -7  -2  19   41.05    4.12
   7   2 -19   42.47    4.12
  -7   2  19   37.86    4.13
   6  -2 -19   -0.04    0.10
  -6  -2  19   -0.02    0.10
   6  -2 -19    0.07    0.08
  -6   2  19    0.11    0.14
   6   2 -19    0.07    0.10
   5  -2 -19    6.82    0.69
  -5  -2  19    6.27    0.74
   5  -2 -19    5.95    0.82
  -5  -2  19    5.69    0.72
  -5   2  19    6.86    0.74
   5   2 -19    6.02    0.72
  -4  -2  19    7.23    0.79
   4  -2 -19    7.52    0.73
   4  -2 -19    6.65    0.85
  -4  -2  19    6.55    0.76
   4   2 -19    6.24    0.76
  -4   2  19    6.08    0.76
  -3  -2  19    6.44    0.69
   3  -2 -19    5.44    0.66
   3  -2 -19    8.86    0.85
  -3  -2  19    5.97    0.72
  -3   2  19    5.91    0.69
   3   2 -19    6.08    0.69
  -2  -2  19    1.65    0.27
   2  -2 -19    1.74    0.37
   2  -2 -19    1.85    0.26
  -2  -2  19    2.02    0.34
  -2   2  19    1.86    0.30
   2   2 -19    1.48    0.27
   1  -2 -19   52.73    4.86
  -1  -2  19   52.79    4.88
   1   2 -19   45.51    4.86
  -1   2  19   43.53    4.87
   0  -2 -19    7.28    0.77
   0  -2  19    7.61    0.78
   0   2  19    6.58    0.78
   0   2 -19    6.86    0.77
   1  -2  19   52.65    4.94
  -1   2 -19   46.01    4.93
  -2  -2 -19    0.17    0.10
   2  -2  19    0.23    0.10
   2   2  19    0.21    0.13
  -2   2 -19    0.18    0.09
  -3  -2 -19   18.71    1.80
   3  -2  19   18.55    1.79
  -3   2 -19   13.91    1.76
   3   2  19   17.76    1.81
   4  -2  19    0.64    0.19
  -4  -2 -19    0.81    0.21
  -4   2 -19    1.24    0.24
   4   2  19    0.74    0.23
   5  -2  19   76.16    7.46
  -5  -2 -19   70.55    7.47
  -5   2 -19   76.40    7.47
  -6  -2 -19    7.83    0.88
   6  -2  19    6.50    0.84
   6   2  19    6.88    0.90
  -6   2 -19    7.97    0.88
   7  -2  19    1.52    0.33
  -7  -2 -19    1.66    0.38
  -7   2 -19    1.90    0.37
   7   2  19    1.74    0.42
  -8  -2 -19    0.84    0.29
   8   2  19    1.24    0.35
  -8   2 -19    1.11    0.31
  -9  -2 -19    7.16    1.01
  -9   2 -19    6.75    1.00
   9   2  19    6.40    0.99
 -10  -2 -19    1.92    0.49
 -10   2 -19    2.13    0.48
  10   2  19    1.69    0.47
  10  -3 -19    3.13    0.71
  10   3 -19    3.45    0.57
 -10   3  19    2.36    0.54
   9  -3 -19    8.64    1.18
  -9   3  19    8.46    1.04
   9   3 -19    8.48    1.02
   8  -3 -19    4.51    0.86
  -8  -3  19    6.02    0.67
  -8   3  19    5.03    0.69
   8   3 -19    5.00    0.67
  -7  -3  19    0.57    0.20
   7  -3 -19    0.46    0.29
   7   3 -19    0.65    0.23
  -7   3  19    0.80    0.24
   6  -3 -19    0.84    0.34
  -6  -3  19    0.93    0.23
  -6  -3  19    1.42    0.31
   6   3 -19    1.16    0.27
  -6   3  19    1.86    0.31
  -5  -3  19   39.05    3.90
   5  -3 -19   44.71    4.12
  -5  -3  19   37.90    3.98
  -5   3  19   39.58    3.93
   5   3 -19   34.26    3.92
   4  -3 -19    8.43    1.09
  -4  -3  19    9.03    0.94
  -4  -3  19    8.72    1.03
   4   3 -19    8.31    0.96
  -4   3  19    9.14    0.97
  -3  -3  19   94.57    8.96
  -3  -3  19   90.55    9.06
   3  -3 -19   83.46    9.10
  -3   3  19   98.15    8.99
   3   3 -19   83.02    8.98
  -2  -3  19    2.38    0.29
   2  -3 -19    2.51    0.48
  -2  -3  19    2.90    0.47
   2   3 -19    2.25    0.34
  -2   3  19    2.08    0.35
   1  -3 -19    2.38    0.47
  -1  -3  19    2.95    0.32
  -1  -3  19    2.37    0.44
   1   3 -19    2.29    0.32
  -1   3  19    2.61    0.34
   0  -3  19    2.78    0.48
   0  -3 -19    3.09    0.51
   0   3  19    2.75    0.36
   0   3 -19    2.68    0.35
  -1  -3 -19   51.43    5.82
   1  -3  19   61.68    5.84
   1   3  19   52.96    5.75
  -1   3 -19   63.56    5.75
  -2  -3 -19    8.32    0.85
  -2  -3 -19    7.04    0.88
   2  -3  19    8.90    0.92
   2   3  19    5.81    0.82
  -2   3 -19    7.43    0.81
  -3  -3 -19   15.38    1.44
   3  -3  19   12.86    1.44
  -3  -3 -19   12.53    1.35
   3   3  19   12.22    1.39
  -3   3 -19   12.08    1.36
   4  -3  19    0.04    0.12
  -4  -3 -19   -0.01    0.09
  -4  -3 -19    0.02    0.10
  -4   3 -19   -0.03    0.08
   4   3  19   -0.11    0.10
  -5  -3 -19    2.28    0.36
   5  -3  19    1.66    0.38
  -5   3 -19    1.89    0.36
   5   3  19    1.77    0.39
   6  -3  19    0.44    0.20
  -6  -3 -19    0.67    0.20
   6   3  19    0.25    0.18
  -6   3 -19    0.44    0.17
   7  -3  19   18.66    1.97
   7   3  19   17.13    1.98
   8  -3  19    5.15    0.79
  -8   3 -19    5.37    0.80
   8   3  19    4.84    0.81
  -9   3 -19   11.14    1.46
   9   3  19   13.06    1.47
   9  -4 -19    2.36    0.67
  -9   4  19    1.90    0.44
   9   4 -19    2.10    0.43
   8  -4 -19    6.89    1.08
   8   4 -19    4.98    0.69
  -8   4  19    5.13    0.77
   7  -4 -19   13.89    1.81
  -7   4  19   15.34    1.64
   7   4 -19   15.24    1.63
  -6  -4  19    9.07    1.06
   6  -4 -19    8.15    1.15
   6   4 -19    8.00    0.97
  -6   4  19    8.90    0.99
   5  -4 -19    4.57    0.83
  -5  -4  19    4.56    0.71
  -5   4  19    4.65    0.57
   5   4 -19    4.15    0.56
  -4  -4  19    6.66    0.91
   4  -4 -19    9.26    1.06
  -4   4  19    6.76    0.82
   4   4 -19    7.55    0.83
   3  -4 -19   26.68    2.99
  -3  -4  19   25.17    2.92
   3   4 -19   31.15    2.83
  -3   4  19   26.46    2.81
   2  -4 -19    0.86    0.32
  -2  -4  19    0.87    0.29
   2   4 -19    0.97    0.21
  -2   4  19    1.11    0.22
  -1  -4  19   36.94    4.00
   1  -4 -19   40.73    4.05
   1   4 -19   35.77    3.88
  -1   4  19   41.22    3.90
   0  -4 -19    1.03    0.34
   0  -4  19    1.38    0.36
   0   4 -19    1.32    0.23
   0   4  19    1.36    0.25
   1  -4  19   20.57    2.24
  -1  -4 -19   18.48    2.21
   1   4  19   24.07    2.14
  -1   4 -19   18.99    2.10
  -2  -4 -19    0.66    0.24
   2  -4  19    0.36    0.20
  -2   4 -19    0.62    0.16
   2   4  19    0.65    0.19
  -3  -4 -19    0.31    0.19
   3  -4  19    0.36    0.21
   3   4  19    0.55    0.20
  -3   4 -19    0.32    0.13
   4  -4  19    4.69    0.70
  -4   4 -19    3.78    0.51
   4   4  19    4.54    0.64
   5  -4  19   36.79    3.35
   5   4  19   28.89    3.26
  -5   4 -19   29.74    3.21
   6  -4  19   10.56    1.30
  -6   4 -19   11.28    1.23
   6   4  19   10.75    1.29
   7  -4  19    3.53    0.64
   7   4  19    3.93    0.67
   8   4  19    6.10    0.89
  -8   4 -19    4.99    0.81
   7  -5 -19    0.75    0.41
   7   5 -19    0.10    0.16
  -6  -5  19    3.95    0.77
   6  -5 -19    6.28    1.02
   6   5 -19    4.45    0.66
   5  -5 -19   10.95    1.34
  -5  -5  19    8.35    1.19
   5   5 -19    9.50    1.07
  -4  -5  19   25.24    2.88
   4  -5 -19   28.61    3.01
  -3  -5  19   12.27    1.50
   3  -5 -19   13.21    1.58
   2  -5 -19    1.50    0.44
  -2  -5  19    1.59    0.41
  -1  -5  19    0.05    0.16
   1  -5 -19    0.15    0.20
   0  -5 -19   13.48    1.55
   0  -5  19   12.25    1.51
   1  -5  19   14.83    1.90
  -1  -5 -19   19.02    1.94
  -2  -5 -19    6.78    0.92
   2  -5  19    7.28    0.95
   3  -5  19   12.09    1.45
   4  -5  19    1.20    0.36
   5  -5  19    0.36    0.26
   6  -5  19    0.25    0.21
   6   5  19    0.13    0.20
   7  -5  19    9.56    1.21
   7   5  19    9.26    1.19
   5  -6 -19    1.49    0.52
  -5  -6  19    1.19    0.40
  -4  -6  19    2.39    0.60
   4  -6 -19    4.21    0.81
   3  -6 -19    6.89    1.11
  -3  -6  19    5.66    0.97
   2  -6 -19    6.83    1.11
  -2  -6  19    6.78    1.05
  -1  -6  19   12.02    1.55
   1  -6 -19   13.59    1.61
   0  -6  19    5.10    0.88
   0  -6 -19    4.26    0.81
   1  -6  19    0.18    0.23
   2  -6  19    1.33    0.42
   3  -6  19    2.05    0.54
   4  -6  19    4.95    0.87
   5  -6  19   11.93    1.50
  11   0 -20    0.08    0.18
 -11   0  20    0.18    0.22
  10   0 -20   14.68    1.52
 -10   0  20   12.40    1.52
   9   0 -20    0.70    0.20
  -9   0  20   -0.03    0.13
   8   0 -20    0.79    0.23
   8   0 -20    0.88    0.29
  -8   0  20    0.89    0.26
   7   0 -20    0.09    0.13
   7   0 -20    0.05    0.10
  -7   0  20    0.09    0.12
   6   0 -20   38.58    3.44
   6   0 -20   34.47    3.33
  -6   0  20   26.42    3.33
   5   0 -20    0.00    0.11
  -5   0  20    0.02    0.11
   5   0 -20    0.10    0.09
   4   0 -20  114.97   10.82
  -4   0  20  102.54   10.84
  -3   0  20    0.45    0.13
   3   0 -20    0.15    0.08
   2   0 -20   47.82    4.76
  -2   0  20   47.10    4.77
  -1   0  20    0.32    0.12
   1   0 -20    0.37    0.10
   0   0  20   87.52    7.80
   0   0 -20   69.35    7.77
   1   0  20    0.04    0.08
  -1   0 -20    0.10    0.07
   2   0  20  120.37   12.93
  -2   0 -20  139.60   12.93
  -3   0 -20    0.06    0.09
   3   0  20    0.05    0.09
  -4   0 -20    4.07    0.56
   4   0  20    5.22    0.60
  -5   0 -20    0.74    0.19
   5   0  20    0.15    0.14
   6   0  20   30.10    3.53
  -6   0 -20   38.62    3.55
  -7   0 -20   -0.02    0.13
   7   0  20    0.14    0.16
   8   0  20   20.66    2.07
  -8   0 -20   16.56    2.02
  -9   0 -20    0.05    0.16
   9   0  20    0.15    0.20
 -10   0 -20   12.03    1.41
  10   0  20   10.63    1.40
 -11   1  20    3.30    0.58
 -10  -1  20   -0.12    0.15
  10  -1 -20   -0.02    0.13
  10   1 -20   -0.09    0.16
 -10   1  20    0.15    0.20
   9  -1 -20    1.99    0.49
  -9  -1  20    2.64    0.43
   9  -1 -20    1.63    0.34
   9   1 -20    3.11    0.47
  -9   1  20    2.32    0.45
   8  -1 -20   49.33    4.34
  -8  -1  20   41.89    4.20
   8  -1 -20   37.96    4.15
  -8   1  20   36.48    4.19
   8   1 -20   41.74    4.19
   7  -1 -20    0.71    0.26
  -7  -1  20    0.52    0.20
   7  -1 -20    0.37    0.16
  -7   1  20    0.95    0.25
   7   1 -20    0.49    0.18
   7   1 -20    0.48    0.21
  -6  -1  20   18.93    2.01
   6  -1 -20   19.43    2.11
   6  -1 -20   18.96    1.97
   6   1 -20   18.96    2.00
  -6   1  20   19.40    2.02
  -5  -1  20   10.77    1.12
   5  -1 -20    9.20    1.10
   5  -1 -20   10.84    1.23
  -5  -1  20   11.01    1.15
   5   1 -20   10.91    1.13
  -5   1  20   10.16    1.14
   4  -1 -20    8.97    0.82
   4  -1 -20    6.12    0.88
  -4  -1  20    7.08    0.82
  -4  -1  20    6.34    0.82
   4   1 -20    7.36    0.82
  -4   1  20    8.42    0.85
  -3  -1  20    1.10    0.21
   3  -1 -20    0.66    0.16
   3   1 -20    0.81    0.18
  -3   1  20    0.95    0.20
   2  -1 -20   94.64    9.31
  -2  -1  20   96.71    9.34
  -2   1  20   89.78    9.33
   1  -1 -20    0.16    0.08
  -1  -1  20    0.09    0.09
  -1   1  20    0.02    0.08
   1   1 -20    0.13    0.08
   0  -1 -20   78.82    7.80
   0  -1  20   75.56    7.81
   0   1  20   80.54    7.82
   1  -1  20   10.30    0.92
  -1  -1 -20    7.63    0.89
   1   1  20    7.77    0.91
  -1   1 -20    7.56    0.88
   2  -1  20    7.67    0.90
  -2  -1 -20   10.01    0.91
   2   1  20    7.42    0.90
  -2   1 -20    7.45    0.88
   3  -1  20    0.23    0.13
  -3   1 -20    0.22    0.12
   3   1  20    0.27    0.14
  -4  -1 -20   33.03    3.59
   4  -1  20   34.16    3.60
  -4   1 -20   40.53    3.60
   4   1  20   33.08    3.61
  -5  -1 -20    1.00    0.25
   5  -1  20    0.87    0.25
   5   1  20    0.97    0.26
  -5   1 -20    0.86    0.24
   6  -1  20   30.58    2.73
  -6  -1 -20   23.83    2.70
  -6   1 -20   22.62    2.68
   6   1  20   27.04    2.74
   7  -1  20    0.22    0.17
  -7  -1 -20    0.01    0.14
  -7   1 -20    0.20    0.15
   7   1  20   -0.02    0.14
  -8  -1 -20   -0.06    0.17
   8  -1  20   -0.09    0.16
   8   1  20    0.09    0.19
  -8   1 -20   -0.04    0.14
   9  -1  20    0.33    0.24
  -9  -1 -20    0.14    0.21
  -9   1 -20    0.16    0.23
   9   1  20    0.42    0.25
 -10  -1 -20   10.79    1.31
  10  -1  20   10.06    1.31
 -10   1 -20   11.45    1.33
  10   1  20   10.45    1.51
  10  -2 -20   13.83    1.72
 -10  -2  20   14.98    1.59
 -10   2  20   14.07    1.61
  10   2 -20   13.74    1.57
  -9  -2  20    0.30    0.20
   9  -2 -20    0.15    0.21
  -9   2  20    0.10    0.17
   9   2 -20    0.31    0.17
   8  -2 -20    7.37    1.03
  -8  -2  20    7.24    0.91
   8   2 -20    8.67    0.92
  -8   2  20    7.38    0.92
   7  -2 -20    2.31    0.51
   7  -2 -20    1.55    0.29
  -7  -2  20    2.64    0.39
   7   2 -20    2.00    0.37
  -7   2  20    1.81    0.37
   6  -2 -20   11.39    1.43
   6  -2 -20   12.94    1.28
  -6  -2  20   11.77    1.32
  -6   2  20   12.54    1.33
   6   2 -20   11.69    1.32
  -5  -2  20    2.46    0.40
   5  -2 -20    2.53    0.32
  -5  -2  20    2.63    0.42
   5  -2 -20    2.21    0.48
  -5   2  20    2.66    0.42
   5   2 -20    2.52    0.40
  -4  -2  20   61.00    6.70
   4  -2 -20   68.58    6.64
   4  -2 -20   55.89    6.75
  -4  -2  20   78.65    6.69
  -4   2  20   58.38    6.66
   4   2 -20   76.70    6.68
   3  -2 -20   10.45    1.04
   3  -2 -20    7.58    0.84
  -3  -2  20    9.58    0.88
  -3  -2  20    7.39    0.90
  -3   2  20    7.01    0.86
   3   2 -20    7.19    0.86
   2  -2 -20   19.80    2.06
  -2  -2  20   19.36    2.08
   2   2 -20   20.61    2.08
  -2   2  20   21.54    2.10
   1  -2 -20    0.12    0.08
  -1  -2  20    0.25    0.11
   1  -2 -20    0.27    0.15
   1   2 -20    0.09    0.08
  -1   2  20    0.30    0.11
   0  -2 -20   54.54    5.29
   0  -2  20   49.33    5.29
   0   2 -20   56.35    5.30
   0   2  20   51.20    5.30
   1  -2  20    3.01    0.38
   1   2  20    2.56    0.42
  -1   2 -20    3.17    0.38
  -2  -2 -20   33.96    3.73
   2  -2  20   36.46    3.74
  -2   2 -20   41.73    3.75
   2   2  20   35.87    3.76
   3  -2  20    4.31    0.52
  -3  -2 -20    4.72    0.54
   3   2  20    4.08    0.55
  -3   2 -20    3.82    0.51
   4  -2  20    0.70    0.20
  -4  -2 -20    0.63    0.19
   4   2  20    0.63    0.21
  -4   2 -20    0.87    0.22
  -5  -2 -20    0.23    0.14
   5  -2  20    0.27    0.14
   5   2  20    0.55    0.20
  -5   2 -20    0.22    0.15
   6  -2  20   19.78    2.20
  -6  -2 -20   22.89    2.24
  -6   2 -20   19.61    2.21
   6   2  20   21.93    2.26
  -7  -2 -20    6.73    0.83
   7  -2  20    6.76    0.80
  -7   2 -20    5.27    0.80
   7   2  20    7.73    0.88
  -8  -2 -20   10.09    1.29
   8   2  20   11.12    1.31
  -8   2 -20   11.55    1.29
  -9  -2 -20    0.58    0.30
   9   2  20    0.51    0.28
  -9   2 -20    0.56    0.29
 -10  -2 -20    3.47    0.70
  10   2  20    3.81    0.75
 -10   2 -20    3.81    0.72
  10  -3 -20    1.36    0.48
 -10   3  20    1.20    0.39
  10   3 -20    1.88    0.45
   9  -3 -20    6.04    1.11
  -9   3  20    6.69    1.00
   9   3 -20    8.93    0.94
  -8  -3  20   30.45    3.51
   8  -3 -20   28.29    3.55
  -8   3  20   38.70    3.45
   8   3 -20   32.95    3.40
  -7  -3  20    3.03    0.45
   7  -3 -20    2.72    0.61
  -7   3  20    2.51    0.45
   7   3 -20    2.45    0.45
  -6  -3  20   23.42    2.24
   6  -3 -20   19.90    2.33
  -6  -3  20   19.50    2.15
  -6   3  20   19.56    2.18
   6   3 -20   21.88    2.19
  -5  -3  20    0.45    0.15
   5  -3 -20    0.93    0.32
  -5  -3  20    0.41    0.19
  -5   3  20    0.47    0.17
   5   3 -20    0.56    0.18
  -4  -3  20   -0.01    0.08
  -4  -3  20    0.06    0.11
   4  -3 -20    0.09    0.18
   4   3 -20   -0.08    0.07
  -4   3  20   -0.05    0.08
  -3  -3  20    1.30    0.23
  -3  -3  20    1.17    0.30
   3  -3 -20    1.51    0.38
  -3   3  20    1.26    0.25
   3   3 -20    1.62    0.27
  -2  -3  20   34.58    3.57
  -2  -3  20   35.43    3.46
   2  -3 -20   32.90    3.62
   2   3 -20   34.39    3.49
  -2   3  20   34.42    3.49
  -1  -3  20    6.18    0.69
   1  -3 -20    6.00    0.82
  -1  -3  20    6.83    0.80
  -1   3  20    6.00    0.72
   1   3 -20    7.11    0.72
   0  -3  20   12.44    1.49
   0  -3 -20   13.83    1.53
   0   3  20   15.09    1.44
   0   3 -20   12.94    1.42
  -1  -3 -20    0.99    0.28
   1  -3  20    1.69    0.34
  -1   3 -20    1.17    0.22
   1   3  20    1.54    0.27
  -2  -3 -20    1.69    0.38
   2  -3  20    1.74    0.39
  -2  -3 -20    2.40    0.40
  -2   3 -20    2.38    0.34
   2   3  20    2.74    0.40
  -3  -3 -20    2.64    0.37
   3  -3  20    2.72    0.48
  -3  -3 -20    3.40    0.49
  -3   3 -20    2.77    0.42
   3   3  20    3.23    0.48
  -4  -3 -20   12.48    1.27
   4  -3  20   11.33    1.34
  -4  -3 -20   11.58    1.31
  -4   3 -20   11.14    1.27
   4   3  20   12.56    1.33
  -5  -3 -20    5.66    0.65
   5  -3  20    5.44    0.71
   5   3  20    5.32    0.70
  -5   3 -20    4.74    0.65
   6  -3  20   15.40    1.77
   6   3  20   17.51    1.81
  -6   3 -20   15.49    1.73
   7  -3  20    5.00    0.79
   7   3  20    6.34    0.89
   8  -3  20    1.84    0.40
   8   3  20    1.08    0.39
  -8   3 -20    1.79    0.40
   9   3  20    1.33    0.42
  -9   3 -20    2.09    0.48
   9  -4 -20    1.60    0.56
  -9   4  20    1.37    0.37
   9   4 -20    1.34    0.34
   8  -4 -20    2.87    0.69
   8   4 -20    1.67    0.39
  -8   4  20    2.23    0.43
   7  -4 -20    2.25    0.58
  -7   4  20    2.72    0.47
   7   4 -20    3.53    0.51
  -6  -4  20    7.28    0.97
   6  -4 -20    7.38    1.17
  -6   4  20    6.86    0.87
   6   4 -20    8.61    0.90
   5  -4 -20    3.18    0.66
  -5  -4  20    2.52    0.51
  -5   4  20    2.73    0.43
   5   4 -20    2.84    0.45
  -4  -4  20   30.12    2.63
  -4   4  20   22.55    2.46
   4   4 -20   22.01    2.47
   3  -4 -20    7.57    0.97
  -3  -4  20    6.02    0.87
   3   4 -20    6.76    0.78
  -3   4  20    7.31    0.79
  -2  -4  20    5.28    0.86
   2  -4 -20    5.53    0.93
   2   4 -20    7.31    0.74
  -2   4  20    6.30    0.73
  -1  -4  20    1.19    0.34
   1  -4 -20    1.49    0.41
  -1   4  20    2.10    0.32
   1   4 -20    1.77    0.28
   0  -4 -20   11.42    1.44
   0   4 -20   12.21    1.32
   0   4  20   13.71    1.34
  -1  -4 -20   11.63    1.43
   1  -4  20   11.91    1.45
   1   4  20   12.38    1.34
  -1   4 -20   13.57    1.33
  -2  -4 -20   82.29    6.94
   2   4  20   60.42    6.82
  -2   4 -20   63.97    6.79
   3  -4  20   16.71    1.60
  -3  -4 -20   11.44    1.50
   3   4  20   12.00    1.47
  -3   4 -20   15.13    1.45
   4  -4  20    0.57    0.25
   4   4  20    0.76    0.25
  -4   4 -20    0.90    0.22
   5  -4  20    0.24    0.20
  -5   4 -20    0.03    0.12
   5   4  20    0.15    0.17
   6  -4  20    5.41    0.82
   6   4  20    5.56    0.81
  -6   4 -20    4.94    0.66
   7  -4  20    1.85    0.47
   7   4  20    3.43    0.59
   8   4  20    4.53    0.76
  -8   4 -20    3.86    0.66
   7  -5 -20    5.05    1.03
   7   5 -20    5.83    0.73
   6  -5 -20   12.66    1.47
  -6  -5  20    8.99    1.24
   6   5 -20    9.73    1.14
   5  -5 -20    0.00    0.22
  -5  -5  20    0.07    0.23
   5   5 -20    0.12    0.13
   4  -5 -20    1.72    0.49
  -4  -5  20    1.33    0.40
  -3  -5  20    1.93    0.47
   3  -5 -20    2.21    0.54
  -2  -5  20   20.83    2.33
   2  -5 -20   21.25    2.39
   1  -5 -20    3.49    0.70
  -1  -5  20    4.16    0.72
   0  -5 -20   28.24    2.71
   0  -5  20   20.77    2.62
   1  -5  20    2.64    0.54
  -1  -5 -20    2.19    0.50
   2  -5  20    0.29    0.22
   3  -5  20    0.86    0.33
   4  -5  20   19.87    2.23
   5  -5  20   11.66    1.38
   5   5  20   10.80    1.37
   6  -5  20   11.47    1.36
   6   5  20   10.31    1.29
   7  -5  20    4.00    0.74
  -5  -6  20    3.36    0.69
   5  -6 -20    4.16    0.88
  -4  -6  20   15.66    1.85
   4  -6 -20   15.30    1.93
  -3  -6  20    4.31    0.85
   3  -6 -20    5.50    0.98
  -2  -6  20    2.37    0.60
   2  -6 -20    3.83    0.75
  -1  -6  20    0.22    0.26
   1  -6 -20    0.42    0.28
   0  -6  20    1.74    0.50
   0  -6 -20    2.15    0.55
   1  -6  20    7.50    1.14
   2  -6  20    6.68    1.08
   3  -6  20    8.48    1.15
   4  -6  20   -0.06    0.21
  11   0 -21   -0.03    0.16
 -11   0  21    0.14    0.22
 -10   0  21    0.11    0.17
  -9   0  21   15.76    1.77
   9   0 -21   16.26    1.73
   8   0 -21   -0.11    0.13
   8   0 -21   -0.08    0.11
  -8   0  21    0.03    0.12
   7   0 -21   41.13    4.48
  -7   0  21   43.32    4.51
   7   0 -21   49.06    4.59
   6   0 -21    0.06    0.10
  -6   0  21    0.31    0.16
   6   0 -21    0.00    0.13
   5   0 -21    0.45    0.15
   5   0 -21    0.20    0.16
  -5   0  21    0.29    0.14
  -4   0  21    0.08    0.09
   4   0 -21    0.02    0.07
   3   0 -21   99.01    9.78
  -3   0  21   97.51    9.79
   2   0 -21    0.12    0.08
  -2   0  21    0.12    0.09
  -1   0  21   81.68    7.56
   1   0 -21   69.99    7.53
   0   0  21    0.09    0.09
   0   0 -21    0.21    0.08
   1   0  21    1.17    0.27
  -1   0 -21    1.82    0.28
   2   0  21    0.52    0.16
  -2   0 -21    0.60    0.16
  -3   0 -21   11.10    1.10
   3   0  21    8.86    1.09
  -4   0 -21    0.05    0.10
   4   0  21    0.16    0.13
  -5   0 -21   70.18    6.31
   5   0  21   54.87    6.30
   6   0  21    0.74    0.24
  -6   0 -21    0.51    0.20
  -7   0 -21   25.37    2.68
   7   0  21   25.01    2.69
   8   0  21    0.68    0.28
  -8   0 -21    0.23    0.19
   9   0  21   10.48    1.25
  -9   0 -21    9.45    1.21
  10   0  21    0.22    0.26
 -10   0 -21    0.32    0.23
 -10  -1  21    0.87    0.30
  10  -1 -21    0.59    0.21
 -10   1  21    0.66    0.27
  -9  -1  21   13.79    1.38
   9  -1 -21   11.61    1.35
   9  -1 -21   11.71    1.46
   9   1 -21   12.73    1.36
  -9   1  21   10.22    1.34
   8  -1 -21    0.67    0.29
   8  -1 -21    0.95    0.22
  -8   1  21    0.84    0.26
  -7  -1  21   11.52    1.15
   7  -1 -21   11.69    1.26
   7  -1 -21    9.29    1.09
   7   1 -21    8.92    1.16
   7   1 -21   10.15    1.12
  -7   1  21    9.60    1.13
  -6  -1  21    0.22    0.14
   6  -1 -21    0.25    0.19
   6  -1 -21   -0.03    0.08
   6   1 -21    0.14    0.12
  -6   1  21    0.16    0.13
  -5  -1  21   80.50    7.95
  -5  -1  21   77.78    7.92
   5  -1 -21   80.26    7.91
  -5   1  21   77.18    7.94
   5   1 -21   80.90    7.93
  -4  -1  21    0.55    0.17
   4  -1 -21    0.75    0.25
   4  -1 -21    0.31    0.13
  -4   1  21    0.29    0.14
   4   1 -21    0.51    0.15
  -3  -1  21   20.30    2.24
   3  -1 -21   24.88    2.23
   3   1 -21   19.53    2.23
  -3   1  21   22.45    2.25
   2  -1 -21    0.18    0.08
  -2  -1  21    0.09    0.08
  -2   1  21    0.16    0.10
   2   1 -21    0.07    0.07
  -1  -1  21    4.74    0.53
   1  -1 -21    4.25    0.51
  -1   1  21    4.70    0.54
   1   1 -21    4.13    0.51
   0  -1 -21    0.27    0.10
   0  -1  21    0.04    0.08
   0   1 -21    0.36    0.11
   0   1  21    0.09    0.09
  -1  -1 -21   34.01    3.78
  -1   1 -21   37.26    3.78
   1   1  21   41.63    3.82
  -2  -1 -21    3.99    0.53
   2  -1  21    5.48    0.56
   2   1  21    3.97    0.55
  -2   1 -21    4.41    0.53
   3  -1  21   21.62    2.16
  -3  -1 -21   22.93    2.17
   3   1  21   22.40    2.19
  -3   1 -21   16.70    2.13
   4  -1  21    1.01    0.25
  -4  -1 -21    1.01    0.24
  -4   1 -21    0.89    0.22
   4   1  21    0.95    0.25
   5  -1  21    0.83    0.24
  -5  -1 -21    0.52    0.20
   5   1  21    0.42    0.19
  -5   1 -21    0.64    0.21
   6  -1  21    0.93    0.26
  -6  -1 -21    1.09    0.28
  -6   1 -21    0.56    0.22
   6   1  21    1.14    0.31
   7  -1  21   22.05    2.22
  -7   1 -21   20.00    2.22
   7   1  21   19.44    2.23
  -8  -1 -21   -0.02    0.17
   8  -1  21    0.22    0.21
  -8   1 -21    0.02    0.17
   8   1  21    0.49    0.25
   9  -1  21   11.48    1.36
  -9  -1 -21   11.15    1.38
   9   1  21   10.21    1.39
  -9   1 -21   12.97    1.38
 -10  -1 -21    0.89    0.34
  10  -1  21    0.79    0.33
 -10   1 -21    0.55    0.32
  10   1  21    1.15    0.39
  10  -2 -21    1.18    0.46
 -10  -2  21    1.19    0.34
 -10   2  21    3.25    0.50
  -9  -2  21    7.43    0.98
   9  -2 -21    7.89    1.28
   9   2 -21    9.42    0.99
  -9   2  21    7.93    1.00
   8  -2 -21   -0.03    0.18
  -8  -2  21    0.01    0.13
   8   2 -21    0.02    0.12
  -8   2  21    0.08    0.15
   7  -2 -21   59.25    5.96
   7  -2 -21   52.35    5.75
  -7   2  21   61.62    5.83
   7   2 -21   58.02    5.80
   6  -2 -21    7.31    1.02
   6  -2 -21    7.38    0.87
  -6  -2  21   10.54    0.96
   6   2 -21    8.00    0.92
  -6   2  21    7.86    0.93
   5  -2 -21   28.08    3.27
  -5  -2  21   31.64    3.19
   5  -2 -21   28.06    3.11
  -5  -2  21   32.88    3.17
   5   2 -21   29.49    3.16
  -5   2  21   35.94    3.19
  -4  -2  21    6.94    0.74
   4  -2 -21    5.72    0.78
   4  -2 -21    5.61    0.65
  -4  -2  21    5.94    0.69
   4   2 -21    6.56    0.70
  -4   2  21    5.45    0.69
   3  -2 -21   52.49    5.05
  -3  -2  21   44.41    5.07
   3  -2 -21   46.26    5.18
   3   2 -21   52.68    5.08
  -3   2  21   56.43    5.10
  -2  -2  21   16.69    1.96
   2  -2 -21   20.82    1.96
   2  -2 -21   17.37    2.07
  -2  -2  21   20.53    2.03
  -2   2  21   18.07    1.98
   2   2 -21   21.20    1.98
  -1  -2  21   37.44    4.09
   1  -2 -21   44.72    4.09
   1  -2 -21   38.07    4.19
   1   2 -21   39.39    4.09
  -1   2  21   43.45    4.11
   0  -2  21    4.78    0.51
   0  -2 -21    3.95    0.49
   0   2  21    4.78    0.51
   0   2 -21    3.33    0.48
   1  -2  21    2.78    0.38
   1   2  21    3.39    0.46
  -2  -2 -21    1.65    0.31
   2  -2  21    1.79    0.31
   2   2  21    2.05    0.34
  -2   2 -21    1.97    0.31
  -3  -2 -21   26.25    2.86
   3  -2  21   27.06    2.86
   3   2  21   25.26    2.88
  -3   2 -21   33.24    2.88
   4  -2  21    8.61    0.99
  -4  -2 -21    8.85    1.01
  -4   2 -21    9.86    1.01
   4   2  21    8.35    1.03
  -5  -2 -21   21.49    2.32
   5  -2  21   18.69    2.28
   5   2  21   22.47    2.35
  -5   2 -21   26.43    2.34
   6  -2  21    1.23    0.27
  -6  -2 -21    0.98    0.27
  -6   2 -21    1.14    0.29
   6   2  21    0.80    0.29
   7  -2  21    2.13    0.42
  -7  -2 -21    3.40    0.54
   7   2  21    2.12    0.47
  -7   2 -21    2.76    0.49
  -8  -2 -21    0.66    0.26
   8   2  21    0.43    0.25
  -8   2 -21    0.39    0.22
  -9  -2 -21    8.28    1.05
   9   2  21    7.19    1.11
  -9   2 -21    8.02    1.07
   9  -3 -21    6.65    1.16
  -9   3  21    6.36    0.92
   9   3 -21    9.13    0.94
   8  -3 -21    0.63    0.33
   8   3 -21    0.74    0.25
  -8   3  21    1.52    0.31
  -7  -3  21    5.90    0.72
   7  -3 -21    6.08    0.99
  -7   3  21    5.44    0.73
   7   3 -21    6.22    0.73
   6  -3 -21    2.98    0.64
  -6  -3  21    2.93    0.45
   6   3 -21    3.51    0.50
  -6   3  21    3.29    0.50
   5  -3 -21   45.79    4.10
  -5  -3  21   32.19    3.92
  -5  -3  21   40.54    3.87
   5   3 -21   39.91    3.89
  -5   3  21   35.03    3.88
   4  -3 -21    1.49    0.43
  -4  -3  21    2.05    0.32
  -4  -3  21    2.49    0.43
  -4   3  21    2.35    0.35
   4   3 -21    1.70    0.33
  -3  -3  21   14.44    1.39
   3  -3 -21   12.92    1.54
  -3  -3  21   12.48    1.48
   3   3 -21   13.02    1.41
  -3   3  21   13.11    1.41
  -2  -3  21    1.79    0.29
  -2  -3  21    1.65    0.37
   2  -3 -21    1.41    0.38
   2   3 -21    2.70    0.35
  -2   3  21    2.19    0.34
  -1  -3  21    4.59    0.54
  -1  -3  21    6.36    0.69
   1  -3 -21    4.56    0.73
  -1   3  21    4.37    0.57
   1   3 -21    5.11    0.57
   0  -3 -21    6.35    0.89
   0  -3  21    7.34    0.89
   0   3 -21    7.66    0.81
   0   3  21    7.60    0.82
  -1  -3 -21   13.94    1.69
   1  -3  21   14.50    1.69
  -1   3 -21   15.35    1.60
   1   3  21   17.55    1.64
  -2  -3 -21   22.37    2.13
   2  -3  21   19.03    2.11
  -2   3 -21   18.87    2.03
   2   3  21   18.86    2.06
  -3  -3 -21   14.16    1.59
  -3  -3 -21   17.52    1.68
   3  -3  21   13.09    1.65
  -3   3 -21   14.61    1.59
   3   3  21   16.93    1.65
  -4  -3 -21    4.04    0.48
  -4  -3 -21    3.00    0.57
  -4   3 -21    3.35    0.52
   4   3  21    3.98    0.58
  -5  -3 -21    0.45    0.24
   5   3  21    0.19    0.18
  -5   3 -21    0.05    0.12
   6  -3  21    4.71    0.72
   6   3  21    5.43    0.77
  -6   3 -21    4.11    0.65
   7  -3  21   19.67    2.07
   7   3  21   17.59    2.07
   8  -3  21    0.01    0.18
  -8   3 -21    0.20    0.21
   8   3  21   -0.13    0.17
   9   3  21    5.93    1.00
  -9   3 -21    7.31    1.04
   8  -4 -21    3.62    0.76
   8   4 -21    2.37    0.50
  -8   4  21    3.67    0.56
   7  -4 -21   20.39    2.44
   7   4 -21   23.86    2.26
  -7   4  21   19.17    2.23
  -6  -4  21    1.89    0.43
   6  -4 -21    1.35    0.47
  -6   4  21    1.55    0.33
   6   4 -21    1.78    0.33
  -5  -4  21    0.24    0.21
   5  -4 -21    0.29    0.26
   5   4 -21    0.18    0.13
  -5   4  21    0.03    0.12
   4  -4 -21    0.76    0.34
  -4  -4  21    0.85    0.28
  -4   4  21    0.60    0.20
   4   4 -21    1.12    0.23
   3  -4 -21   22.84    2.60
  -3  -4  21   21.36    2.51
  -3   4  21   22.35    2.41
   3   4 -21   26.83    2.44
  -2  -4  21    9.86    1.20
   2  -4 -21    9.15    1.22
  -2   4  21    9.95    1.09
   2   4 -21   10.55    1.09
  -1  -4  21   27.05    2.47
   1  -4 -21   19.95    2.43
   1   4 -21   21.44    2.28
  -1   4  21   22.18    2.30
   0  -4 -21    4.32    0.76
   0  -4  21    6.18    0.75
   0   4  21    5.79    0.62
   0   4 -21    4.48    0.58
  -1  -4 -21    0.05    0.13
   1  -4  21   -0.06    0.12
  -1   4 -21    0.02    0.09
   1   4  21   -0.04    0.10
   2  -4  21    0.30    0.19
  -2  -4 -21    0.21    0.16
  -2   4 -21    0.08    0.10
   2   4  21    0.23    0.14
   3  -4  21   11.44    1.35
  -3  -4 -21   15.46    1.61
   3   4  21   10.45    1.26
  -3   4 -21   10.86    1.21
   4  -4  21   11.93    1.47
   4   4  21   12.11    1.42
  -4   4 -21   13.58    1.37
   5  -4  21   17.00    2.11
   5   4  21   17.33    2.09
  -5   4 -21   23.05    2.07
   6  -4  21    4.99    0.75
   6   4  21    4.03    0.70
  -6   4 -21    4.09    0.63
   7  -4  21    4.24    0.68
   7   4  21    2.99    0.64
   8   4  21    0.49    0.31
  -8   4 -21    0.82    0.29
   7  -5 -21    2.02    0.63
   7   5 -21    3.24    0.51
  -6  -5  21    0.61    0.34
   6  -5 -21    0.31    0.30
   6   5 -21    0.58    0.22
   5  -5 -21   12.38    1.43
  -5  -5  21    8.62    1.25
   5   5 -21    9.70    1.11
   4  -5 -21    7.63    1.17
  -4  -5  21    6.42    1.00
  -3  -5  21   16.37    1.94
   3  -5 -21   17.68    2.03
   2  -5 -21    0.87    0.34
  -2  -5  21    0.45    0.25
  -1  -5  21    5.25    0.82
   1  -5 -21    4.39    0.80
   0  -5  21    9.05    1.11
   0  -5 -21    7.97    1.09
  -1  -5 -21   30.92    3.63
   1  -5  21   38.84    3.70
   2  -5  21    8.83    1.13
   3  -5  21    3.61    0.68
   4  -5  21    0.27    0.21
   5  -5  21    1.00    0.35
   5   5  21    0.91    0.34
   6  -5  21    6.44    1.05
   6   5  21    8.06    0.99
   5  -6 -21    1.13    0.49
  -5  -6  21    0.99    0.40
  -4  -6  21    0.16    0.25
   4  -6 -21    0.09    0.29
  -3  -6  21    6.85    1.19
   3  -6 -21    9.31    1.35
  -2  -6  21   17.52    2.30
   2  -6 -21   24.02    2.44
  -1  -6  21    6.40    1.00
   1  -6 -21    4.80    0.93
   0  -6  21   11.46    1.40
   0  -6 -21    9.94    1.39
   1  -6  21    0.72    0.33
   2  -6  21    1.15    0.42
   3  -6  21    1.20    0.42
   4  -6  21   10.84    1.41
 -10   0  22   18.79    2.24
  10   0 -22   22.50    2.21
   9   0 -22    0.58    0.20
   8   0 -22    0.68    0.28
   8   0 -22    0.91    0.24
  -8   0  22    1.23    0.30
   7   0 -22    0.01    0.13
  -7   0  22    0.01    0.13
   7   0 -22    0.52    0.15
   6   0 -22   53.95    5.79
  -6   0  22   59.39    5.74
   5   0 -22   -0.10    0.07
  -5   0  22    0.05    0.11
  -4   0  22   19.21    1.81
   4   0 -22   15.44    1.76
   3   0 -22    0.43    0.12
  -3   0  22    0.31    0.13
  -2   0  22    9.94    1.15
   2   0 -22   11.39    1.14
  -1   0  22    0.37    0.13
   1   0 -22    0.39    0.11
   0   0  22    6.14    0.82
   0   0 -22    8.76    0.83
   1   0  22    0.14    0.11
  -1   0 -22   -0.04    0.07
   2   0  22   77.60    8.11
  -2   0 -22   84.35    8.10
   3   0  22    0.77    0.21
  -3   0 -22    0.64    0.18
   4   0  22   21.25    2.04
  -4   0 -22   17.14    2.00
   5   0  22    0.68    0.21
   6   0  22   44.23    4.05
  -6   0 -22   34.54    4.00
  -7   0 -22    0.30    0.18
   7   0  22    0.21    0.19
   8   0  22   20.88    2.40
  -8   0 -22   22.84    2.39
   9   0  22    0.16    0.23
  -9   0 -22   -0.04    0.20
 -10   0 -22    0.11    0.24
  10   0  22    0.12    0.25
 -10  -1  22    7.09    0.86
  10  -1 -22    5.00    0.80
 -10   1  22    6.53    0.85
  10   1 -22    8.56    0.86
   9  -1 -22    0.24    0.26
  -9  -1  22    0.81    0.26
   9  -1 -22    0.52    0.20
   9   1 -22    0.34    0.18
  -9   1  22    0.50    0.23
   8  -1 -22   24.65    2.54
   8  -1 -22   25.08    2.67
  -8  -1  22   24.14    2.57
   8   1 -22   23.10    2.54
  -8   1  22   25.07    2.58
   7  -1 -22    1.05    0.33
   7  -1 -22    1.20    0.24
  -7  -1  22    1.14    0.27
  -7   1  22    0.87    0.27
   7   1 -22    0.90    0.24
   7   1 -22    0.84    0.27
  -6  -1  22    5.58    0.71
   6  -1 -22    6.75    0.68
   6  -1 -22    5.51    0.86
  -6   1  22    6.46    0.72
   6   1 -22    5.00    0.68
   5  -1 -22    3.50    0.38
   5  -1 -22    2.64    0.51
  -5  -1  22    2.79    0.43
  -5  -1  22    2.46    0.40
  -5   1  22    2.56    0.44
   5   1 -22    2.51    0.42
  -4  -1  22    0.87    0.21
   4  -1 -22    0.72    0.26
   4  -1 -22    0.93    0.19
   4   1 -22    0.64    0.18
  -4   1  22    0.80    0.21
   3  -1 -22    1.88    0.31
  -3  -1  22    2.53    0.37
  -3   1  22    2.48    0.37
   3   1 -22    2.29    0.35
  -2  -1  22   48.32    4.53
   2  -1 -22   42.29    4.50
   2   1 -22   45.71    4.52
  -2   1  22   43.62    4.53
  -1  -1  22    1.34    0.25
   1  -1 -22    1.30    0.22
   1   1 -22    1.29    0.23
  -1   1  22    0.82    0.21
   0  -1 -22   38.66    4.01
   0   1 -22   39.06    4.01
   0   1  22   41.83    4.03
  -1  -1 -22    0.30    0.12
   1  -1  22    0.60    0.16
  -1   1 -22    0.55    0.14
   1   1  22    0.43    0.15
  -2  -1 -22   24.08    2.20
   2  -1  22   16.72    2.17
   2   1  22   19.48    2.20
  -2   1 -22   24.70    2.20
   3  -1  22    0.17    0.13
  -3  -1 -22    0.17    0.12
  -3   1 -22    0.15    0.11
   3   1  22    0.16    0.12
   4  -1  22   52.89    5.30
  -4   1 -22   51.96    5.28
   4   1  22   51.81    5.31
  -5  -1 -22    1.66    0.33
   5  -1  22    1.20    0.30
  -5   1 -22    1.40    0.30
   5   1  22    1.34    0.34
   6  -1  22   22.23    2.45
  -6  -1 -22   25.03    2.47
   6   1  22   22.38    2.47
  -7  -1 -22    2.70    0.51
   7  -1  22    2.21    0.47
  -7   1 -22    2.94    0.50
   7   1  22    2.69    0.54
  -8  -1 -22    2.92    0.60
   8  -1  22    3.38    0.63
   8   1  22    3.31    0.60
  -8   1 -22    3.64    0.61
  -9  -1 -22    0.82    0.30
   9  -1  22    1.03    0.33
   9   1  22    0.96    0.35
  -9   1 -22    0.45    0.27
  10  -1  22   18.63    2.08
 -10  -1 -22   17.13    2.09
 -10   1 -22   19.65    2.12
  10   1  22   17.40    2.11
  10  -2 -22   27.46    3.53
 -10  -2  22   33.29    3.41
  10   2 -22   37.05    3.41
 -10   2  22   31.07    3.41
   9  -2 -22    3.05    0.68
  -9  -2  22    2.77    0.52
  -9   2  22    2.77    0.52
   8  -2 -22   -0.06    0.18
  -8  -2  22    0.22    0.18
   8   2 -22    0.13    0.14
  -8   2  22    0.38    0.21
   7  -2 -22    1.47    0.41
  -7  -2  22    1.03    0.27
   7  -2 -22    1.05    0.23
   7   2 -22    1.10    0.28
  -7   2  22    0.98    0.28
   6  -2 -22   34.04    3.86
  -6  -2  22   36.93    3.74
   6  -2 -22   41.08    3.70
  -6   2  22   35.79    3.75
   6   2 -22   34.04    3.73
   5  -2 -22   27.33    2.46
  -5  -2  22   18.82    2.28
  -5  -2  22   20.28    2.27
   5  -2 -22   21.63    2.23
  -5   2  22   20.00    2.27
   5   2 -22   26.01    2.29
   4  -2 -22   11.19    1.53
  -4  -2  22   14.56    1.48
   4  -2 -22   13.77    1.41
  -4  -2  22   14.79    1.45
  -4   2  22   14.58    1.45
   4   2 -22   12.08    1.43
  -3  -2  22    3.08    0.49
   3  -2 -22    2.90    0.55
   3  -2 -22    2.97    0.38
  -3  -2  22    3.07    0.41
   3   2 -22    3.74    0.42
  -3   2  22    3.12    0.42
   2  -2 -22    0.46    0.21
   2  -2 -22    0.38    0.12
  -2  -2  22    0.50    0.15
   2   2 -22    0.53    0.15
  -2   2  22    0.23    0.12
   1  -2 -22    1.31    0.31
  -1  -2  22    0.78    0.19
   1  -2 -22    0.86    0.18
  -1   2  22    0.77    0.20
   1   2 -22    0.84    0.18
   0  -2 -22   22.18    2.44
   0  -2  22   26.50    2.47
   0   2 -22   23.75    2.45
   0   2  22   23.48    2.46
   1  -2  22    0.10    0.11
   1   2  22    0.17    0.12
  -1   2 -22    0.24    0.11
   2  -2  22   88.09    9.68
  -2  -2 -22   87.29    9.68
  -2   2 -22  101.39    9.68
   2   2  22  113.38    9.73
   3  -2  22   -0.01    0.10
  -3  -2 -22    0.18    0.12
  -3   2 -22    0.10    0.09
   3   2  22    0.20    0.15
   4  -2  22    1.03    0.23
  -4  -2 -22    0.74    0.22
   4   2  22    0.56    0.22
  -4   2 -22    0.38    0.17
   5  -2  22    2.57    0.46
  -5  -2 -22    2.96    0.50
  -5   2 -22    3.88    0.53
   5   2  22    3.26    0.54
  -6  -2 -22   25.82    2.78
   6  -2  22   28.30    2.76
   6   2  22   27.05    2.83
  -6   2 -22   24.34    2.76
   7  -2  22    4.11    0.67
  -7  -2 -22    4.55    0.72
  -7   2 -22    3.70    0.65
   7   2  22    5.46    0.79
  -8  -2 -22   32.29    3.15
   8   2  22   31.16    3.16
  -8   2 -22   25.53    3.08
  -9  -2 -22    0.05    0.22
  -9   2 -22    0.22    0.24
   9   2  22    0.19    0.25
   9  -3 -22    0.51    0.32
  -9   3  22    0.65    0.27
   9   3 -22    0.35    0.21
   8  -3 -22   19.93    2.47
  -8   3  22   20.38    2.29
   8   3 -22   23.63    2.29
   7  -3 -22    0.59    0.30
  -7  -3  22    0.42    0.19
  -7   3  22    0.34    0.19
   7   3 -22    0.44    0.19
   6  -3 -22    4.05    0.79
  -6  -3  22    4.34    0.57
   6   3 -22    4.55    0.58
  -6   3  22    5.06    0.60
  -5  -3  22    0.05    0.13
   5  -3 -22    0.16    0.21
  -5  -3  22    0.10    0.11
  -5   3  22    0.14    0.14
   5   3 -22    0.07    0.11
  -4  -3  22    5.40    0.61
  -4  -3  22    5.70    0.70
   4  -3 -22    6.29    0.91
  -4   3  22    5.11    0.63
   4   3 -22    4.70    0.62
  -3  -3  22    3.53    0.56
   3  -3 -22    3.18    0.61
  -3  -3  22    2.55    0.41
   3   3 -22    3.57    0.42
  -3   3  22    3.12    0.42
   2  -3 -22   28.09    3.07
  -2  -3  22   27.42    2.90
  -2  -3  22   30.56    3.02
  -2   3  22   31.85    2.94
   2   3 -22   26.27    2.91
  -1  -3  22   66.70    6.30
  -1  -3  22   58.02    6.17
   1  -3 -22   62.28    6.33
  -1   3  22   66.02    6.21
   1   3 -22   58.12    6.19
   0  -3  22   15.63    1.62
   0  -3 -22   13.86    1.62
   0   3  22   13.74    1.52
   0   3 -22   14.67    1.51
   1  -3  22    0.36    0.19
  -1  -3 -22    0.60    0.22
  -1   3 -22    0.41    0.13
   1   3  22    0.16    0.13
   2  -3  22    4.28    0.64
  -2  -3 -22    4.57    0.57
   2   3  22    3.56    0.56
  -2   3 -22    3.46    0.47
  -3  -3 -22    2.07    0.39
  -3   3 -22    1.80    0.33
   3   3  22    2.02    0.38
  -4   3 -22   44.69    4.70
   4   3  22   48.37    4.75
  -5   3 -22    0.04    0.11
   5   3  22    0.24    0.19
  -6   3 -22   24.15    2.45
   6   3  22   21.89    2.49
   7  -3  22    0.62    0.26
   7   3  22    1.13    0.35
   8  -3  22    2.34    0.48
   8   3  22    2.15    0.51
  -8   3 -22    2.37    0.48
   9   3  22   -0.13    0.18
  -9   3 -22    0.24    0.22
   8  -4 -22    0.14    0.27
   8   4 -22    0.45    0.21
  -8   4  22    0.10    0.18
   7  -4 -22    6.76    1.06
  -7   4  22    5.28    0.71
   7   4 -22    5.70    0.71
   6  -4 -22   17.43    2.06
   6   4 -22   17.42    1.83
  -6   4  22   16.60    1.82
  -5  -4  22   16.89    1.84
   5  -4 -22   17.12    1.95
  -5   4  22   16.56    1.73
   5   4 -22   15.01    1.72
  -4  -4  22    8.95    0.98
   4  -4 -22    8.08    1.06
   4   4 -22    6.81    0.84
  -4   4  22    6.93    0.84
   3  -4 -22    0.52    0.29
  -3  -4  22    0.32    0.20
   3   4 -22    0.59    0.17
  -3   4  22    0.56    0.19
  -2  -4  22    0.23    0.17
   2  -4 -22    0.06    0.17
  -2   4  22    0.10    0.12
   2   4 -22   -0.05    0.08
   1  -4 -22    4.14    0.70
  -1  -4  22    5.07    0.72
   1   4 -22    3.71    0.47
  -1   4  22    3.38    0.47
   0  -4  22   11.36    1.42
   0  -4 -22   10.93    1.40
   0   4 -22   12.78    1.29
   0   4  22   12.46    1.30
  -1  -4 -22   11.78    1.50
   1  -4  22   13.81    1.54
  -1   4 -22   14.25    1.41
   1   4  22   12.89    1.42
   2  -4  22   21.73    2.49
  -2  -4 -22   23.25    2.48
   2   4  22   25.84    2.43
  -2   4 -22   21.58    2.36
   3  -4  22    1.79    0.43
   3   4  22    1.66    0.38
  -3   4 -22    2.55    0.36
   4  -4  22    1.60    0.40
  -4   4 -22    1.23    0.27
   4   4  22    1.44    0.34
   5  -4  22    0.29    0.21
   5   4  22    0.08    0.17
  -5   4 -22    0.30    0.15
   6  -4  22   12.22    1.59
  -6   4 -22   14.97    1.54
   6   4  22   13.95    1.60
   7  -4  22    0.95    0.34
   7   4  22    0.98    0.36
   7  -5 -22   11.37    1.35
   7   5 -22    6.97    0.93
   6  -5 -22    3.59    0.77
  -6  -5  22    2.27    0.62
   6   5 -22    3.73    0.56
  -5  -5  22    0.50    0.32
   5  -5 -22    1.63    0.49
   5   5 -22    1.05    0.29
  -4  -5  22    1.44    0.43
   4  -5 -22    2.34    0.61
   4   5 -22    2.17    0.43
   3  -5 -22    6.43    1.16
  -3  -5  22    9.12    1.07
  -2  -5  22   21.94    2.57
   2  -5 -22   25.23    2.66
  -1  -5  22   13.16    1.55
   1  -5 -22   12.66    1.57
   0  -5 -22    7.39    0.94
   0  -5  22    5.47    0.94
  -1  -5 -22   -0.16    0.13
   1  -5  22    0.34    0.23
   2  -5  22    4.13    0.74
   3  -5  22    9.09    1.18
   4  -5  22   20.63    2.33
   5  -5  22    7.63    1.01
   5   5  22    7.05    0.94
   6  -5  22    4.91    0.83
   6   5  22    4.13    0.76
   4  -6 -22    9.30    1.48
  -4  -6  22    9.36    1.25
   3  -6 -22    1.85    0.54
  -3  -6  22    2.02    0.52
  -2  -6  22    0.97    0.37
   2  -6 -22    0.81    0.36
  -1  -6  22    3.10    0.64
   1  -6 -22    1.98    0.55
   0  -6 -22    2.47    0.62
   0  -6  22    4.41    0.77
   1  -6  22   12.67    1.58
   2  -6  22    8.47    1.28
   3  -6  22    3.45    0.72
 -10   0  23    2.14    0.42
  -9   0  23   19.26    2.08
   9   0 -23   19.34    2.05
  -8   0  23    0.00    0.15
   8   0 -23    0.12    0.12
   8   0 -23   -0.01    0.14
   7   0 -23    9.84    1.11
   7   0 -23   11.46    1.24
  -7   0  23    9.33    1.15
   6   0 -23    0.18    0.12
   6   0 -23   -0.04    0.10
  -6   0  23    0.48    0.15
   5   0 -23    1.27    0.26
  -5   0  23    1.21    0.28
   4   0 -23    0.16    0.09
  -4   0  23    0.01    0.09
   3   0 -23   45.76    4.43
  -3   0  23   42.15    4.45
  -2   0  23   -0.03    0.08
   2   0 -23    0.05    0.08
  -1   0  23   98.84    9.38
   1   0 -23   89.36    9.35
   0   0  23    0.46    0.14
   0   0 -23    0.13    0.09
  -1   0 -23    0.11    0.10
   1   0  23    0.25    0.13
  -2   0 -23    0.43    0.14
   2   0  23    0.41    0.15
   3   0  23  124.48   11.08
  -3   0 -23   97.92   11.03
   4   0  23    0.04    0.12
  -4   0 -23   -0.02    0.09
   5   0  23   61.76    6.27
   6   0  23    0.48    0.21
  -6   0 -23   -0.08    0.12
   7   0  23   -0.02    0.17
  -7   0 -23   -0.02    0.13
  -8   0 -23    0.52    0.23
   8   0  23    0.17    0.20
   9   0  23    2.33    0.56
  -9   0 -23    3.38    0.61
 -10  -1  23    0.80    0.25
  10  -1 -23    0.25    0.17
 -10   1  23    0.90    0.28
  10   1 -23    0.86    0.26
  -9  -1  23    2.54    0.48
   9  -1 -23    2.33    0.57
   9  -1 -23    1.87    0.37
  -9   1  23    2.79    0.52
   9   1 -23    2.58    0.50
   8  -1 -23    0.14    0.21
   8  -1 -23    0.36    0.14
  -8  -1  23    0.51    0.19
  -8   1  23    1.22    0.26
  -7  -1  23    3.39    0.57
   7  -1 -23    3.20    0.64
   7  -1 -23    3.63    0.48
   7   1 -23    4.67    0.67
   7   1 -23    4.29    0.53
  -7   1  23    3.24    0.56
  -6  -1  23    0.12    0.12
   6  -1 -23    0.07    0.16
   6  -1 -23    0.03    0.09
  -6   1  23    0.03    0.12
   6   1 -23   -0.01    0.09
  -5  -1  23   44.68    4.15
   5  -1 -23   39.47    4.12
   5  -1 -23   38.31    4.23
  -5  -1  23   43.66    4.17
  -5   1  23   40.86    4.15
   5   1 -23   38.11    4.13
   4  -1 -23    0.09    0.09
   4  -1 -23    0.10    0.16
  -4  -1  23    0.31    0.14
   4   1 -23    0.40    0.14
  -4   1  23    0.31    0.14
   3  -1 -23   30.62    3.20
  -3  -1  23   32.38    3.24
  -3   1  23   33.63    3.24
   3   1 -23   30.41    3.21
   2  -1 -23    0.08    0.07
  -2  -1  23    0.41    0.13
   2   1 -23    0.24    0.10
  -2   1  23    0.08    0.09
   1  -1 -23   32.43    3.39
  -1  -1  23   40.21    3.43
   1   1 -23   31.21    3.40
  -1   1  23   31.37    3.41
   0  -1 -23    2.20    0.34
   0  -1  23    2.32    0.36
   0   1  23    2.04    0.34
   0   1 -23    1.86    0.32
  -1  -1 -23   55.16    6.43
   1  -1  23   72.34    6.46
  -1   1 -23   73.17    6.44
   1   1  23   57.14    6.44
   2  -1  23    1.42    0.29
  -2  -1 -23    1.49    0.29
  -2   1 -23    1.53    0.28
   2   1  23    1.58    0.31
  -3  -1 -23   37.24    3.35
   3  -1  23   36.76    3.35
  -3   1 -23   29.58    3.32
   3   1  23   27.12    3.33
  -4  -1 -23    1.34    0.29
   4  -1  23    1.25    0.29
   4   1  23    1.21    0.29
  -4   1 -23    1.36    0.29
  -5  -1 -23    4.70    0.73
   5  -1  23    4.74    0.67
  -5   1 -23    5.70    0.68
   5   1  23    5.99    0.72
  -6  -1 -23    0.09    0.16
   6  -1  23    0.15    0.18
   6   1  23    0.28    0.21
   7  -1  23   27.95    2.99
  -7  -1 -23   27.80    3.01
  -7   1 -23   29.32    3.01
   8  -1  23    0.47    0.24
  -8  -1 -23    0.14    0.24
  -8   1 -23    0.92    0.31
   8   1  23    1.05    0.35
  -9  -1 -23    7.18    1.05
   9  -1  23    6.46    0.98
   9   1  23    6.98    1.03
  -9   1 -23    7.40    0.94
  10  -2 -23    3.01    0.68
 -10  -2  23    3.15    0.54
  -9  -2  23   11.21    1.29
   9  -2 -23   12.06    1.47
  -9   2  23    9.83    1.27
   9   2 -23   11.79    1.28
  -8  -2  23    4.65    0.68
   8  -2 -23    4.33    0.81
   8   2 -23    5.31    0.63
  -8   2  23    3.82    0.66
   7  -2 -23   14.25    1.57
  -7  -2  23   11.76    1.40
  -7   2  23   11.60    1.41
   7   2 -23   14.06    1.41
   6  -2 -23    4.37    0.78
   6  -2 -23    4.75    0.56
  -6  -2  23    4.77    0.61
  -6   2  23    5.47    0.63
   6   2 -23    4.65    0.60
   5  -2 -23    0.14    0.09
   5  -2 -23    0.09    0.16
  -5  -2  23    0.14    0.13
  -5  -2  23   -0.12    0.09
   5   2 -23    0.09    0.10
  -5   2  23    0.10    0.13
  -4  -2  23    0.08    0.12
   4  -2 -23    0.00    0.08
   4  -2 -23    0.17    0.16
  -4  -2  23    0.21    0.13
  -4   2  23    0.00    0.10
   4   2 -23    0.32    0.14
   3  -2 -23   56.53    5.16
  -3  -2  23   46.67    5.03
  -3  -2  23   45.53    4.98
   3  -2 -23   55.13    4.98
   3   2 -23   49.06    4.99
  -3   2  23   46.18    5.00
  -2  -2  23    0.04    0.09
   2  -2 -23   -0.03    0.07
   2  -2 -23   -0.10    0.12
  -2   2  23    0.06    0.10
   2   2 -23    0.08    0.09
   1  -2 -23  105.42   11.31
  -1  -2  23  119.11   11.34
   1  -2 -23  107.17   11.43
  -1   2  23  123.47   11.35
   1   2 -23  114.22   11.33
   0  -2 -23    2.05    0.32
   0  -2  23    1.99    0.32
   0   2  23    1.71    0.32
   0   2 -23    1.83    0.30
  -1  -2 -23    0.02    0.09
   1  -2  23   -0.12    0.08
   1   2  23    0.16    0.11
  -1   2 -23   -0.08    0.06
  -2  -2 -23    5.59    0.68
   2  -2  23    5.65    0.68
   2   2  23    5.26    0.70
  -2   2 -23    6.82    0.69
   3  -2  23   41.09    3.90
  -3  -2 -23   40.28    3.91
   3   2  23   35.95    3.92
  -3   2 -23   35.92    3.88
  -4  -2 -23    2.96    0.52
   4  -2  23    3.53    0.52
   4   2  23    4.02    0.58
  -4   2 -23    3.70    0.53
  -5  -2 -23   20.68    2.44
   5  -2  23   24.27    2.44
   5   2  23   28.44    2.53
  -5   2 -23   21.32    2.44
  -6  -2 -23    0.24    0.18
   6  -2  23    0.18    0.15
  -6   2 -23    0.19    0.16
   6   2  23    0.31    0.20
  -7  -2 -23    1.79    0.42
  -7   2 -23    2.32    0.44
   7   2  23    1.87    0.45
  -8  -2 -23    1.15    0.34
   8   2  23    1.32    0.40
  -8   2 -23    1.02    0.33
  -9  -2 -23    7.32    1.05
  -9   2 -23    7.41    0.95
   9   2  23    5.79    0.99
   9  -3 -23    0.91    0.40
  -9   3  23    1.29    0.35
   9   3 -23    1.35    0.36
   8  -3 -23    0.30    0.28
   8   3 -23    0.56    0.22
  -8   3  23    0.80    0.24
  -7  -3  23    1.46    0.40
   7  -3 -23    0.79    0.36
  -7   3  23    1.83    0.35
   7   3 -23    1.42    0.32
   6  -3 -23    4.86    0.82
  -6  -3  23    4.69    0.58
  -6   3  23    4.52    0.59
   6   3 -23    4.22    0.57
  -5  -3  23   34.24    3.59
   5  -3 -23   32.33    3.76
  -5  -3  23   39.37    3.69
   5   3 -23   32.05    3.60
  -5   3  23   38.93    3.62
  -4  -3  23   10.28    1.15
   4  -3 -23   13.31    1.39
  -4  -3  23    9.39    1.22
  -4   3  23   11.11    1.18
   4   3 -23   10.68    1.17
   3  -3 -23   12.94    1.62
  -3  -3  23   11.33    1.53
  -3  -3  23   15.22    1.46
  -3   3  23   13.74    1.48
   3   3 -23   15.10    1.48
   2  -3 -23    2.66    0.54
  -2  -3  23    3.18    0.54
  -2  -3  23    3.04    0.39
   2   3 -23    3.11    0.44
  -2   3  23    3.07    0.45
  -1  -3  23   26.83    3.11
  -1  -3  23   31.22    3.04
   1  -3 -23   35.93    3.22
   1   3 -23   31.46    3.04
  -1   3  23   25.47    3.04
   0  -3 -23    0.28    0.19
   0  -3  23    0.46    0.19
   0   3 -23    0.47    0.15
   0   3  23    0.32    0.14
   1  -3  23   41.81    4.44
  -1  -3 -23   48.76    4.48
  -1   3 -23   41.91    4.34
   1   3  23   40.92    4.36
  -2  -3 -23    3.38    0.60
   2  -3  23    3.40    0.60
   2   3  23    4.25    0.53
  -2   3 -23    4.20    0.49
  -3  -3 -23   15.76    1.88
  -3   3 -23   17.63    1.83
   3   3  23   18.71    1.87
   4   3  23    6.83    0.93
  -4   3 -23    8.69    0.92
   5   3  23    1.82    0.41
  -5   3 -23    1.73    0.35
  -6   3 -23    0.43    0.21
   6   3  23    0.85    0.30
   7  -3  23   25.95    2.56
   7   3  23   20.95    2.53
   8  -3  23    6.04    0.87
  -8   3 -23    5.25    0.83
   8   3  23    4.83    0.91
   8  -4 -23    5.37    1.00
   8   4 -23    5.41    0.71
  -8   4  23    5.34    0.77
   7  -4 -23    9.48    1.29
   7   4 -23    8.64    1.04
  -7   4  23    9.19    1.09
   6  -4 -23    1.48    0.48
  -6   4  23    0.82    0.25
   6   4 -23    0.81    0.25
  -5  -4  23    0.06    0.17
   5  -4 -23    0.15    0.22
  -5   4  23    0.00    0.11
   5   4 -23    0.06    0.13
  -4  -4  23    4.58    0.71
   4  -4 -23    3.59    0.74
  -4   4  23    4.87    0.55
   4   4 -23    3.54    0.52
  -3  -4  23   11.81    1.60
   3  -4 -23   16.61    1.75
   3   4 -23   13.87    1.51
  -3   4  23   15.17    1.54
   2  -4 -23   13.02    1.63
  -2  -4  23   11.93    1.55
   2   4 -23   15.56    1.47
  -2   4  23   13.54    1.46
   1  -4 -23   42.36    4.25
  -1  -4  23   39.91    4.22
   1   4 -23   38.99    4.07
  -1   4  23   40.42    4.08
   0  -4  23    1.92    0.45
   0  -4 -23    1.83    0.45
   0   4 -23    2.32    0.35
   0   4  23    2.32    0.37
  -1  -4 -23    1.67    0.43
   1  -4  23    1.30    0.38
  -1   4 -23    1.86    0.31
   1   4  23    2.06    0.35
  -2  -4 -23    0.13    0.15
   2  -4  23    0.30    0.21
   2   4  23    0.20    0.16
  -2   4 -23    0.31    0.14
  -3   4 -23   29.02    2.93
   3   4  23   28.02    2.98
   4  -4  23    4.15    0.72
   4   4  23    4.96    0.70
  -4   4 -23    4.18    0.55
   5  -4  23    9.88    1.31
  -5   4 -23   11.84    1.24
   5   4  23   10.91    1.30
   6  -4  23    3.45    0.61
   6   4  23    2.65    0.57
  -6   4 -23    2.81    0.50
   7  -4  23    0.19    0.23
   7   4  23    0.08    0.22
   6  -5 -23    8.19    1.33
   6   5 -23    7.85    0.96
   5  -5 -23   15.22    1.89
  -5  -5  23   14.07    1.77
   5   5 -23   15.46    1.63
  -4  -5  23   12.86    1.40
   4  -5 -23    9.37    1.42
   4   5 -23   11.06    1.23
  -3  -5  23    5.59    0.88
   3  -5 -23    4.88    0.93
  -2  -5  23    1.02    0.36
   2  -5 -23    1.11    0.40
  -1  -5  23    7.81    1.03
   1  -5 -23    7.43    1.15
   0  -5  23    2.20    0.56
   0  -5 -23    3.58    0.66
  -1  -5 -23   17.97    2.10
   1  -5  23   19.38    2.13
   2  -5  23    1.47    0.43
   3  -5  23    6.92    1.06
   4  -5  23    0.16    0.21
   5  -5  23    0.37    0.28
   5   5  23    0.70    0.27
   6  -5  23    5.20    0.85
   6   5  23    4.28    0.76
   4  -6 -23    1.93    0.60
  -4  -6  23    1.37    0.51
  -3  -6  23    3.25    0.67
   3  -6 -23    2.19    0.61
   2  -6 -23    7.28    1.24
  -2  -6  23    8.73    1.14
  -1  -6  23    3.38    0.73
   1  -6 -23    4.00    0.77
   0  -6 -23    1.21    0.45
   0  -6  23    0.69    0.36
   1  -6  23    0.31    0.28
   2  -6  23    5.98    1.02
   3  -6  23    8.33    1.31
  10   0 -24    3.49    0.58
 -10   0  24    4.41    0.66
  -9   0  24    0.09    0.16
  -8   0  24   -0.01    0.17
   8   0 -24    0.84    0.30
   8   0 -24    0.36    0.18
   7   0 -24    0.04    0.11
   7   0 -24    0.23    0.19
  -7   0  24    0.54    0.20
   6   0 -24   42.06    4.50
   6   0 -24   49.91    4.63
  -6   0  24   42.60    4.53
  -5   0  24   -0.06    0.10
   5   0 -24   -0.06    0.07
  -4   0  24   31.62    3.23
   4   0 -24   31.28    3.20
   3   0 -24    0.09    0.08
  -3   0  24    0.17    0.11
  -2   0  24    1.94    0.33
   2   0 -24    1.90    0.30
   1   0 -24    0.26    0.10
  -1   0  24    0.43    0.14
   0   0 -24   79.17    8.74
   0   0  24   97.37    8.79
  -1   0 -24    0.00    0.09
   1   0  24   -0.05    0.08
   2   0  24   40.45    4.61
  -2   0 -24   50.62    4.62
   3   0  24    0.52    0.17
  -3   0 -24    0.44    0.17
  -4   0 -24    8.34    1.01
   4   0  24    9.60    1.05
   5   0  24    0.70    0.24
  -6   0 -24   11.54    1.22
   6   0  24    9.29    1.21
   7   0  24   -0.14    0.14
  -7   0 -24   -0.09    0.15
   8   0  24   14.10    1.68
  -8   0 -24   15.22    1.70
   9   0  24    0.21    0.21
  -9   0 -24    0.11    0.21
 -10  -1  24    4.40    0.63
  10  -1 -24    3.40    0.52
 -10   1  24    3.01    0.59
  10   1 -24    3.28    0.56
   9  -1 -24   -0.12    0.21
  -9  -1  24   -0.06    0.15
   9  -1 -24    0.21    0.16
   9   1 -24    0.31    0.20
  -9   1  24    0.12    0.17
  -8  -1  24   39.59    3.47
   8  -1 -24   34.78    3.56
   8   1 -24   29.84    3.41
  -8   1  24   29.63    3.43
   7  -1 -24    0.00    0.19
   7  -1 -24    0.06    0.11
  -7  -1  24    0.21    0.16
   7   1 -24    0.05    0.18
  -7   1  24    0.43    0.18
   7   1 -24    0.57    0.18
   6  -1 -24   12.12    1.39
   6  -1 -24   15.27    1.57
  -6  -1  24   12.97    1.44
  -6   1  24   14.53    1.45
   6   1 -24   11.82    1.40
  -5  -1  24    3.43    0.46
   5  -1 -24    3.61    0.45
   5  -1 -24    4.02    0.66
  -5  -1  24    3.78    0.48
   5   1 -24    3.28    0.46
  -5   1  24    3.66    0.48
   4  -1 -24   51.85    5.02
  -4  -1  24   44.30    4.89
   4  -1 -24   56.60    4.88
  -4   1  24   45.43    4.90
   4   1 -24   44.91    4.88
   3  -1 -24    1.87    0.32
  -3  -1  24    2.90    0.40
  -3   1  24    2.21    0.37
   3   1 -24    1.99    0.33
   2  -1 -24   73.83    7.11
  -2  -1  24   66.24    7.13
  -2   1  24   74.54    7.14
   2   1 -24   70.37    7.12
  -1  -1  24    0.01    0.08
   1  -1 -24    0.16    0.09
   1   1 -24    0.20    0.10
  -1   1  24    0.12    0.10
   0  -1  24   12.63    1.14
   0  -1 -24   10.77    1.10
   0   1 -24    8.79    1.08
   0   1  24    9.25    1.11
   1  -1  24    0.80    0.20
  -1  -1 -24    0.68    0.18
   1   1  24    0.86    0.20
  -1   1 -24    0.81    0.19
  -2  -1 -24   19.88    2.43
   2  -1  24   25.43    2.46
  -2   1 -24   23.35    2.43
   2   1  24   26.48    2.48
  -3  -1 -24    0.51    0.18
   3  -1  24    0.60    0.21
  -3   1 -24    0.73    0.21
   3   1  24    0.50    0.19
  -4  -1 -24   41.77    3.73
   4  -1  24   35.67    3.72
  -4   1 -24   31.53    3.68
   5  -1  24    3.94    0.63
  -5  -1 -24    4.21    0.62
   5   1  24    3.62    0.63
  -5   1 -24    4.53    0.64
   6  -1  24    5.56    0.85
  -6  -1 -24    6.01    0.88
   6   1  24    6.81    0.82
  -7  -1 -24    0.43    0.21
   7  -1  24    0.57    0.24
   7   1  24    1.28    0.33
  -7   1 -24    0.86    0.26
  -8  -1 -24   14.70    1.62
   8  -1  24   14.29    1.61
  -8   1 -24   15.11    1.62
   8   1  24   11.65    1.60
  -9  -1 -24    4.17    0.73
   9  -1  24    5.42    0.76
  -9   1 -24    3.02    0.67
   9   1  24    3.57    0.71
 -10  -2  24   11.27    1.28
  10  -2 -24    9.66    1.39
 -10   2  24   12.58    1.30
  10   2 -24    9.32    1.23
   9  -2 -24    1.06    0.41
  -9  -2  24    0.52    0.26
  -9   2  24    1.38    0.32
  -8  -2  24   -0.01    0.14
   8  -2 -24    0.09    0.22
  -8   2  24    0.20    0.17
   8   2 -24    0.22    0.15
  -7  -2  24    2.77    0.43
   7  -2 -24    1.26    0.44
  -7   2  24    2.27    0.42
   7   2 -24    2.12    0.39
   6  -2 -24   50.27    5.61
   6  -2 -24   53.76    5.43
  -6  -2  24   61.94    5.50
  -6   2  24   56.20    5.48
   6   2 -24   48.60    5.46
  -5  -2  24    0.33    0.16
   5  -2 -24    0.51    0.25
   5  -2 -24    0.30    0.12
  -5  -2  24    0.37    0.16
  -5   2  24    0.29    0.16
   5   2 -24    0.24    0.13
  -4  -2  24   30.84    2.81
   4  -2 -24   26.90    2.89
  -4  -2  24   26.11    2.75
   4  -2 -24   27.18    2.71
   4   2 -24   25.67    2.74
  -4   2  24   24.38    2.75
  -3  -2  24    2.03    0.33
  -3  -2  24    2.59    0.42
   3  -2 -24    2.00    0.44
   3  -2 -24    2.07    0.31
  -3   2  24    2.41    0.38
   3   2 -24    1.87    0.33
   2  -2 -24    0.00    0.07
   2  -2 -24   -0.05    0.12
  -2  -2  24   -0.09    0.07
  -2   2  24    0.13    0.12
   2   2 -24    0.04    0.09
   1  -2 -24    0.26    0.12
  -1  -2  24    0.28    0.13
   1  -2 -24    0.74    0.23
   1   2 -24    0.29    0.13
  -1   2  24    0.31    0.14
   0  -2  24   39.41    3.81
   0  -2 -24   36.35    3.79
   0   2 -24   42.13    3.80
   0   2  24   32.22    3.80
   1  -2  24    3.46    0.45
  -1  -2 -24    3.11    0.43
   1   2  24    3.55    0.46
  -1   2 -24    3.43    0.43
   2  -2  24   28.02    2.54
  -2  -2 -24   28.32    2.55
  -2   2 -24   20.59    2.50
   2   2  24   21.87    2.54
   3  -2  24    2.62    0.44
  -3  -2 -24    2.77    0.45
  -3   2 -24    2.61    0.42
   3   2  24    3.11    0.50
  -4  -2 -24    1.23    0.30
   4  -2  24    1.68    0.31
  -4   2 -24    1.22    0.28
   4   2  24    0.89    0.28
  -5  -2 -24    1.52    0.33
   5  -2  24    1.56    0.32
  -5   2 -24    1.38    0.33
   5   2  24    1.27    0.35
  -6  -2 -24    9.63    1.15
   6  -2  24    9.13    1.12
  -6   2 -24    9.43    1.14
   6   2  24   11.12    1.20
  -7  -2 -24    0.28    0.23
   7   2  24    0.73    0.31
  -7   2 -24    0.51    0.25
  -8  -2 -24   10.64    1.33
  -8   2 -24   11.72    1.34
   8   2  24   11.38    1.39
  -9  -2 -24    1.60    0.46
  -9   2 -24    2.12    0.49
   9   2  24    2.14    0.53
   9  -3 -24    3.59    0.78
   9   3 -24    3.72    0.60
  -9   3  24    3.17    0.59
   8  -3 -24   24.73    3.08
  -8   3  24   28.76    2.93
   8   3 -24   28.92    2.92
   7  -3 -24    1.68    0.49
   7   3 -24    1.30    0.31
  -7   3  24    1.22    0.31
  -6  -3  24    6.99    0.83
   6  -3 -24    7.76    1.04
   6   3 -24    7.62    0.86
  -6   3  24    6.77    0.84
   5  -3 -24    4.35    0.77
  -5  -3  24    4.28    0.65
  -5  -3  24    4.69    0.53
   5   3 -24    3.56    0.52
  -5   3  24    4.12    0.55
  -4  -3  24   13.42    1.49
  -4  -3  24   11.70    1.39
   4  -3 -24   14.79    1.62
  -4   3  24   14.01    1.42
   4   3 -24   13.16    1.42
   3  -3 -24   19.64    1.82
  -3  -3  24   13.30    1.55
  -3  -3  24   12.73    1.64
   3   3 -24   16.07    1.58
  -3   3  24   14.97    1.59
  -2  -3  24   24.93    2.90
  -2  -3  24   27.99    2.81
   2   3 -24   25.42    2.82
  -2   3  24   32.00    2.85
  -1  -3  24    8.13    0.93
  -1  -3  24    5.99    0.87
   1  -3 -24    6.08    0.91
  -1   3  24    7.43    0.84
   1   3 -24    8.90    0.84
   0  -3  24   20.36    1.98
   0  -3 -24   17.89    1.99
   0   3  24   19.96    1.89
   0   3 -24   14.75    1.84
   1  -3  24    3.17    0.56
  -1  -3 -24    3.49    0.58
   1   3  24    3.36    0.50
  -1   3 -24    3.26    0.47
  -2  -3 -24    7.71    0.95
   2   3  24    6.48    0.88
  -2   3 -24    8.76    0.87
  -3  -3 -24    8.82    0.96
  -3   3 -24    6.82    0.86
   3   3  24    7.54    0.91
   4   3  24   41.49    4.80
  -4   3 -24   52.18    4.78
   5   3  24    6.08    0.82
  -5   3 -24    6.43    0.78
  -6   3 -24    2.18    0.45
   6   3  24    2.99    0.56
   7   3  24    0.65    0.29
   8  -3  24    4.89    0.77
   8   3  24    4.04    0.79
  -8   3 -24    5.57    0.80
   8  -4 -24    0.73    0.35
   8   4 -24    0.23    0.19
  -8   4  24    0.37    0.23
   7  -4 -24    3.56    0.82
  -7   4  24    4.03    0.64
   7   4 -24    4.38    0.63
   6  -4 -24   17.14    1.84
  -6   4  24   13.65    1.53
   6   4 -24   13.30    1.53
  -5  -4  24    2.97    0.57
   5  -4 -24    2.85    0.66
   5   4 -24    2.83    0.47
  -5   4  24    3.04    0.49
  -4  -4  24   39.39    3.45
   4  -4 -24   28.86    3.45
   4   4 -24   32.94    3.29
  -4   4  24   28.87    3.28
  -3  -4  24    0.93    0.29
   3  -4 -24    1.18    0.38
   3   4 -24    0.67    0.20
  -3   4  24    0.66    0.21
  -2  -4  24    1.18    0.33
   2  -4 -24    0.68    0.31
  -2   4  24    0.90    0.23
   2   4 -24    0.81    0.21
  -1  -4  24    0.73    0.27
   1  -4 -24    0.83    0.32
  -1   4  24    0.55    0.19
   1   4 -24    0.55    0.17
   0  -4 -24   32.92    3.51
   0   4  24   31.22    3.37
   0   4 -24   34.74    3.36
   1  -4  24   18.04    1.84
  -1  -4 -24   14.24    1.80
   1   4  24   14.22    1.69
  -1   4 -24   17.72    1.69
   2  -4  24   10.62    1.32
  -2  -4 -24   13.36    1.35
   2   4  24   11.75    1.24
  -2   4 -24    9.54    1.18
   3  -4  24    4.74    0.79
   3   4  24    5.13    0.73
  -3   4 -24    4.97    0.61
   4  -4  24   -0.18    0.12
   4   4  24    0.03    0.15
  -4   4 -24    0.26    0.14
   5  -4  24    1.65    0.42
  -5   4 -24    1.82    0.36
   5   4  24    1.21    0.37
   6  -4  24    4.88    0.85
   6   4  24    6.55    0.92
  -6   4 -24    5.78    0.74
   7  -4  24    4.13    0.79
   7   4  24    5.44    0.86
  -7   4 -24    6.28    0.84
   6  -5 -24    3.47    0.79
   6   5 -24    3.16    0.55
   5  -5 -24    0.85    0.37
  -5  -5  24    1.21    0.38
   5   5 -24    0.70    0.22
  -4  -5  24   11.34    1.36
   4  -5 -24   10.20    1.43
   4   5 -24   10.69    1.20
   3  -5 -24    3.61    0.71
  -3  -5  24    2.65    0.59
  -2  -5  24   22.63    2.61
   2  -5 -24   24.62    2.69
   1  -5 -24    3.96    0.76
  -1  -5  24    3.94    0.72
   0  -5 -24    1.17    0.39
   0  -5  24    1.42    0.41
  -1  -5 -24    1.14    0.37
   1  -5  24    2.68    0.54
   2  -5  24    5.76    0.95
   3  -5  24    8.90    1.17
   4  -5  24   16.27    1.92
   5  -5  24   12.87    1.48
   5   5  24   10.63    1.36
   3  -6 -24    0.74    0.38
  -3  -6  24    0.58    0.32
  -2  -6  24    0.27    0.26
   2  -6 -24    0.25    0.28
   1  -6 -24    2.42    0.58
  -1  -6  24    1.69    0.50
   0  -6  24    8.12    1.25
   0  -6 -24    8.17    1.13
   1  -6  24    5.14    0.92
   2  -6  24    7.25    1.15
 -10   0  25    0.65    0.27
  10   0 -25    0.02    0.16
  -9   0  25   43.10    4.45
  -8   0  25    0.34    0.18
   8   0 -25    0.20    0.14
   8   0 -25   -0.04    0.16
  -7   0  25   14.44    1.85
   7   0 -25   17.36    1.96
   7   0 -25   20.34    1.85
   6   0 -25    0.06    0.16
   6   0 -25    0.53    0.16
  -6   0  25    0.54    0.20
  -5   0  25    9.75    1.19
   5   0 -25   11.61    1.17
  -4   0  25    0.17    0.14
   4   0 -25    0.00    0.08
  -3   0  25   25.68    2.76
   3   0 -25   27.97    2.75
   2   0 -25    0.11    0.08
  -2   0  25    0.11    0.10
   1   0 -25   23.93    2.09
  -1   0  25   16.52    2.07
   0   0  25    0.18    0.11
   0   0 -25    0.45    0.13
   1   0  25    0.43    0.17
  -1   0 -25    0.49    0.16
   2   0  25    0.54    0.18
  -2   0 -25    0.73    0.19
  -3   0 -25   19.59    2.22
   3   0  25   23.22    2.26
   4   0  25    0.24    0.17
  -4   0 -25    0.02    0.11
   5   0  25   33.40    3.49
  -6   0 -25    0.29    0.19
   6   0  25    0.38    0.21
   7   0  25   -0.03    0.19
  -7   0 -25    0.51    0.24
   8   0  25    0.52    0.25
  -8   0 -25    0.42    0.24
   9   0  25   17.26    2.20
  -9   0 -25   22.35    2.24
  10  -1 -25    0.00    0.19
 -10  -1  25    0.77    0.28
  10   1 -25    0.64    0.23
 -10   1  25    0.27    0.22
   9  -1 -25   -0.01    0.24
  -9  -1  25    0.17    0.20
   9  -1 -25    0.09    0.14
   9   1 -25    0.18    0.18
  -9   1  25    0.01    0.16
  -8  -1  25    1.12    0.26
   8  -1 -25   -0.01    0.17
   8  -1 -25    0.21    0.14
   8   1 -25    0.24    0.16
  -8   1  25    0.15    0.16
   7  -1 -25   25.77    2.48
  -7  -1  25   26.20    2.52
   7  -1 -25   19.43    2.58
   7   1 -25   26.71    2.59
  -7   1  25   24.50    2.51
   7   1 -25   20.47    2.46
  -6  -1  25    0.32    0.17
   6  -1 -25    0.17    0.12
   6  -1 -25    0.38    0.25
   6   1 -25    0.26    0.14
  -6   1  25    0.12    0.14
  -5  -1  25   36.60    3.73
  -5  -1  25   37.01    3.74
   5  -1 -25   36.16    3.70
   5  -1 -25   32.87    3.82
   5   1 -25   34.61    3.71
  -5   1  25   41.83    3.76
  -4  -1  25    2.53    0.39
   4  -1 -25    1.72    0.42
   4  -1 -25    1.80    0.32
   4   1 -25    2.56    0.37
  -4   1  25    2.30    0.39
  -3  -1  25    5.53    0.75
   3  -1 -25    7.09    0.74
  -3   1  25    6.13    0.76
   3   1 -25    7.35    0.75
  -2  -1  25    1.77    0.31
   2  -1 -25    1.62    0.28
  -2   1  25    1.98    0.34
   2   1 -25    1.84    0.30
  -1  -1  25   44.65    4.06
  -1   1  25   39.14    4.05
   1   1 -25   36.52    4.03
   0  -1  25    0.38    0.16
   0  -1 -25    0.38    0.14
   0   1 -25    0.39    0.14
   0   1  25    0.46    0.16
  -1  -1 -25   59.14    6.44
   1  -1  25   72.44    6.47
  -1   1 -25   61.44    6.43
   1   1  25   64.63    6.47
   2  -1  25    5.04    0.57
  -2  -1 -25    4.21    0.54
  -2   1 -25    3.70    0.52
   2   1  25    4.18    0.55
  -3  -1 -25    9.02    1.06
   3  -1  25    9.51    1.07
   3   1  25    8.61    1.07
  -3   1 -25   10.17    1.06
   4  -1  25    1.64    0.35
  -4  -1 -25    2.18    0.39
  -4   1 -25    1.60    0.34
   4   1  25    1.77    0.37
  -5  -1 -25    9.29    1.14
   5  -1  25   11.08    1.17
   5   1  25    8.94    1.15
  -5   1 -25   10.20    1.14
  -6  -1 -25    5.94    0.80
   6  -1  25    6.13    0.78
   6   1  25    6.09    0.90
   7  -1  25   19.97    2.34
  -7  -1 -25   23.32    2.38
  -7   1 -25   22.27    2.37
  -8  -1 -25    0.58    0.30
   8  -1  25    0.55    0.26
   8   1  25    0.65    0.30
  -8   1 -25    0.73    0.29
  -9  -1 -25    3.10    0.63
   9  -1  25    3.48    0.66
   9   1  25    3.87    0.67
  -9   1 -25    3.68    0.66
  -9  -2  25   25.13    2.86
   9  -2 -25   27.17    3.03
  -9   2  25   25.50    2.86
   9   2 -25   30.37    2.86
   8  -2 -25    4.06    0.74
  -8  -2  25    3.08    0.53
   8   2 -25    2.99    0.51
  -8   2  25    2.83    0.53
  -7  -2  25   15.95    1.68
   7  -2 -25   15.49    1.84
   7   2 -25   16.03    1.68
  -7   2  25   14.44    1.67
   6  -2 -25    0.75    0.31
  -6  -2  25    0.95    0.24
   6  -2 -25    0.64    0.17
   6   2 -25    1.25    0.26
  -6   2  25    0.41    0.19
  -5  -2  25    4.22    0.51
   5  -2 -25    2.84    0.41
   5  -2 -25    3.43    0.65
  -5  -2  25    3.20    0.50
   5   2 -25    3.69    0.46
  -5   2  25    3.76    0.47
  -4  -2  25    2.65    0.45
  -4  -2  25    2.55    0.40
   4  -2 -25    2.34    0.51
   4  -2 -25    2.32    0.36
   4   2 -25    2.71    0.40
  -4   2  25    2.51    0.42
   3  -2 -25   85.92    8.53
  -3  -2  25   96.70    8.57
   3  -2 -25   82.42    8.68
  -3  -2  25   76.04    8.59
   3   2 -25   91.85    8.55
  -3   2  25   79.88    8.56
   2  -2 -25    8.60    0.96
  -2  -2  25    6.42    0.80
   2  -2 -25    7.67    0.79
   2   2 -25    6.22    0.79
  -2   2  25    7.37    0.82
  -1  -2  25   17.43    1.75
   1  -2 -25   13.48    1.82
   1  -2 -25   16.18    1.72
  -1   2  25   18.07    1.76
   1   2 -25   17.11    1.74
   0  -2  25    2.73    0.38
   0  -2 -25    2.24    0.35
   0   2  25    2.03    0.36
   0   2 -25    1.78    0.33
   1  -2  25    9.66    1.05
  -1  -2 -25   10.15    1.06
  -1   2 -25    9.38    1.04
   1   2  25    8.79    1.06
   2  -2  25    3.48    0.49
  -2  -2 -25    3.74    0.50
   2   2  25    4.01    0.58
  -2   2 -25    4.04    0.49
  -3  -2 -25   11.90    1.27
   3  -2  25   11.01    1.25
  -3   2 -25   12.05    1.25
   3   2  25   10.48    1.28
  -4  -2 -25    3.86    0.56
   4  -2  25    2.86    0.49
  -4   2 -25    3.46    0.52
   4   2  25    3.41    0.58
   5  -2  25   16.93    1.73
  -5  -2 -25   19.01    1.78
   5   2  25   14.65    1.77
  -5   2 -25   13.82    1.72
   6  -2  25    2.14    0.41
  -6  -2 -25    2.41    0.45
  -6   2 -25    2.41    0.45
   6   2  25    1.53    0.41
  -7  -2 -25    3.76    0.70
  -7   2 -25    3.74    0.66
   7   2  25    5.59    0.79
  -8  -2 -25    0.57    0.29
  -8   2 -25    0.24    0.23
   8   2  25    0.26    0.27
  -9  -2 -25   14.42    1.69
  -9   2 -25   14.83    1.69
   9   2  25   13.58    1.71
   9  -3 -25    0.21    0.33
  -9   3  25   -0.09    0.16
   9   3 -25    0.10    0.16
   8  -3 -25    2.51    0.65
   8   3 -25    3.50    0.53
  -8   3  25    2.61    0.49
   7  -3 -25   10.71    1.24
   7   3 -25    7.25    0.95
  -7   3  25    8.32    0.97
   6  -3 -25    2.98    0.63
  -6  -3  25    2.10    0.43
  -6   3  25    2.57    0.45
   6   3 -25    2.82    0.44
   5  -3 -25   23.27    2.56
  -5  -3  25   24.91    2.45
  -5   3  25   21.18    2.36
   5   3 -25   22.19    2.36
   4  -3 -25    5.07    0.88
  -4  -3  25    4.91    0.63
  -4  -3  25    5.49    0.73
   4   3 -25    5.57    0.65
  -4   3  25    5.95    0.67
  -3  -3  25   13.40    1.45
   3  -3 -25   10.11    1.47
  -3  -3  25   11.84    1.33
   3   3 -25   12.84    1.35
  -3   3  25   14.10    1.37
  -2  -3  25    3.57    0.47
   2  -3 -25    3.90    0.68
  -2  -3  25    4.34    0.65
  -2   3  25    4.06    0.50
   2   3 -25    3.45    0.47
   1  -3 -25   10.75    1.20
  -1  -3  25    9.20    1.12
   1   3 -25    9.71    1.03
  -1   3  25    8.41    1.03
   0  -3  25   14.89    1.89
   0  -3 -25   15.35    1.92
   0   3  25   18.50    1.84
   0   3 -25   19.57    1.82
  -1  -3 -25   29.29    3.40
   1  -3  25   29.98    3.39
   1   3  25   38.45    3.35
  -1   3 -25   31.63    3.30
  -2  -3 -25    0.72    0.28
   2   3  25    1.00    0.27
  -2   3 -25    1.82    0.29
  -3  -3 -25    1.93    0.42
  -3   3 -25    2.64    0.40
   3   3  25    1.75    0.39
  -4   3 -25    0.97    0.26
   4   3  25    1.22    0.32
  -5   3 -25   15.99    1.86
   5   3  25   19.10    1.94
  -6   3 -25    5.17    0.77
   6   3  25    8.08    0.90
   7   3  25   17.23    1.97
   8  -3  25    0.25    0.23
  -8   3 -25    0.22    0.23
   8   3  25    0.23    0.24
   8  -4 -25    1.02    0.46
  -8   4  25    0.99    0.31
   8   4 -25    1.00    0.29
   7  -4 -25    6.16    1.22
  -7   4  25    8.07    0.98
   7   4 -25    9.54    1.00
   6  -4 -25    0.08    0.24
   6   4 -25    0.17    0.15
  -6   4  25   -0.12    0.13
  -5  -4  25    5.20    0.84
   5  -4 -25    6.44    1.01
  -5   4  25    4.67    0.65
   5   4 -25    5.62    0.67
   4  -4 -25    0.50    0.29
  -4  -4  25    0.27    0.20
   4   4 -25    0.30    0.16
  -4   4  25    0.54    0.20
   3  -4 -25   15.83    2.18
  -3  -4  25   18.81    2.14
   3   4 -25   22.73    2.04
  -3   4  25   18.78    2.04
  -2  -4  25   13.69    1.45
   2  -4 -25   11.95    1.48
  -2   4  25   10.00    1.29
   2   4 -25   13.27    1.31
   1  -4 -25   14.09    1.79
  -1  -4  25   18.49    1.82
  -1   4  25   15.76    1.65
   1   4 -25   14.48    1.62
   0  -4  25    0.96    0.32
   0  -4 -25    0.54    0.27
   0   4  25    0.71    0.20
   0   4 -25    0.47    0.17
   1  -4  25    0.18    0.19
  -1  -4 -25    0.06    0.16
   1   4  25    0.15    0.12
  -1   4 -25    0.06    0.10
  -2  -4 -25    2.21    0.47
   2  -4  25    2.54    0.54
  -2   4 -25    2.69    0.40
   2   4  25    2.24    0.44
   3  -4  25   11.47    1.23
  -3   4 -25    9.84    1.07
   3   4  25    8.18    1.10
   4  -4  25    5.88    0.93
   4   4  25    5.75    0.87
  -4   4 -25    6.43    0.75
   5  -4  25    7.33    1.12
  -5   4 -25    7.84    0.94
   5   4  25    8.60    1.02
   6  -4  25    1.85    0.46
  -6   4 -25    1.45    0.36
   6   4  25    1.96    0.45
   7  -4  25    0.99    0.34
   7   4  25    0.92    0.37
  -7   4 -25    0.53    0.26
   6  -5 -25    2.32    0.65
   6   5 -25    2.24    0.44
  -5  -5  25   13.19    1.65
   5  -5 -25   14.58    1.83
   5   5 -25   14.53    1.54
   4  -5 -25    5.61    1.00
  -4  -5  25    4.52    0.85
   4   5 -25    4.93    0.63
  -3  -5  25    0.54    0.28
   3  -5 -25    0.93    0.41
  -2  -5  25    0.63    0.29
   2  -5 -25    1.10    0.39
   1  -5 -25   10.57    1.26
  -1  -5  25    7.69    1.25
   0  -5 -25   12.62    1.67
   0  -5  25   16.03    1.72
   1  -5  25    8.32    1.18
  -1  -5 -25   10.05    1.21
   2  -5  25   14.39    1.73
   3  -5  25    1.21    0.42
   4  -5  25    1.25    0.43
   5  -5  25    3.04    0.71
   5   5  25    4.55    0.73
   3  -6 -25    5.55    0.99
  -3  -6  25    4.31    0.92
   2  -6 -25   10.50    1.39
  -2  -6  25    9.66    1.33
  -1  -6  25    8.80    1.33
   1  -6 -25    8.92    1.23
   0  -6 -25    0.09    0.24
   0  -6  25    0.14    0.28
   1  -6  25    0.89    0.40
   2  -6  25    4.37    0.84
  10   0 -26   10.70    1.24
 -10   0  26   11.06    1.30
   9   0 -26    0.14    0.14
   8   0 -26    9.22    1.36
  -8   0  26   12.68    1.32
   8   0 -26   12.31    1.28
   7   0 -26    0.03    0.11
  -7   0  26   -0.02    0.12
   7   0 -26    0.09    0.16
   6   0 -26   30.50    3.16
  -6   0  26   30.02    3.08
   6   0 -26   28.40    3.03
   5   0 -26    0.03    0.10
  -5   0  26    0.04    0.13
  -4   0  26   17.04    1.70
   4   0 -26   14.82    1.66
  -3   0  26    0.31    0.14
   3   0 -26    0.26    0.12
   2   0 -26    6.24    0.78
  -2   0  26    8.36    0.84
  -1   0  26    0.45    0.15
   1   0 -26    0.26    0.11
   0   0  26   26.15    3.05
   0   0 -26   33.45    3.05
   1   0  26   -0.01    0.10
  -1   0 -26    0.01    0.09
   2   0  26   51.07    5.14
  -2   0 -26   50.12    5.12
  -3   0 -26    0.49    0.18
   3   0  26    0.37    0.18
  -4   0 -26    2.55    0.46
   4   0  26    2.61    0.50
   5   0  26    0.29    0.19
   6   0  26   28.23    3.35
  -6   0 -26   36.27    3.39
   7   0  26   -0.20    0.15
  -7   0 -26    0.02    0.15
  -8   0 -26   12.56    1.52
   8   0  26   13.24    1.52
   9   0  26    0.21    0.23
  -9   0 -26    0.38    0.27
 -10  -1  26   10.14    1.23
  10   1 -26    9.63    1.19
 -10   1  26   11.27    1.30
  -9  -1  26    1.09    0.33
   9  -1 -26    1.14    0.27
   9  -1 -26    0.58    0.32
   9   1 -26    1.56    0.33
  -9   1  26    0.91    0.33
   8  -1 -26   20.28    2.37
   8  -1 -26   20.22    2.22
  -8  -1  26   19.96    2.27
  -8   1  26   25.19    2.30
   8   1 -26   20.81    2.25
   7  -1 -26    0.42    0.16
   7  -1 -26    0.62    0.28
  -7  -1  26    0.50    0.21
  -7   1  26    0.49    0.20
   7   1 -26    0.15    0.22
   7   1 -26    0.67    0.21
  -6  -1  26    4.48    0.64
   6  -1 -26    5.22    0.79
   6  -1 -26    3.80    0.53
   6   1 -26    4.28    0.56
  -6   1  26    4.79    0.59
  -5  -1  26    0.38    0.17
   5  -1 -26    0.09    0.16
  -5  -1  26    0.02    0.12
   5  -1 -26    0.16    0.11
  -5   1  26    0.23    0.14
   5   1 -26    0.47    0.15
  -4  -1  26   44.06    4.93
   4  -1 -26   53.90    5.08
   4  -1 -26   48.13    4.90
   4   1 -26   52.74    4.92
  -4   1  26   46.04    4.94
   3  -1 -26    2.68    0.36
  -3  -1  26    2.83    0.43
   3   1 -26    2.78    0.42
  -3   1  26    2.67    0.44
  -2  -1  26   54.86    5.22
   2  -1 -26   50.60    5.19
   2   1 -26   43.97    5.19
  -2   1  26   58.73    5.24
   1  -1 -26    0.44    0.16
  -1  -1  26    0.94    0.21
  -1   1  26    0.87    0.22
   1   1 -26    0.82    0.18
   0  -1 -26    0.22    0.13
   0  -1  26    0.22    0.13
   0   1 -26    0.16    0.11
   0   1  26    0.16    0.13
   1  -1  26    0.56    0.18
  -1  -1 -26    0.62    0.18
   1   1  26    0.94    0.21
  -1   1 -26    0.68    0.17
  -2  -1 -26    6.81    0.84
   2  -1  26    7.18    0.86
   2   1  26    6.59    0.86
  -2   1 -26    8.66    0.86
  -3  -1 -26    0.24    0.14
   3  -1  26    0.43    0.19
  -3   1 -26    0.18    0.13
   3   1  26    0.24    0.16
   4  -1  26   42.48    4.20
  -4  -1 -26   42.34    4.19
  -4   1 -26   38.07    4.17
   4   1  26   40.42    4.21
   5  -1  26    0.25    0.18
  -5  -1 -26    0.51    0.20
   5   1  26    0.45    0.20
  -5   1 -26    0.11    0.16
   6  -1  26    1.44    0.36
  -6  -1 -26    1.24    0.35
   6   1  26    2.23    0.45
  -7  -1 -26    2.10    0.46
   7  -1  26    2.46    0.49
   7   1  26    2.14    0.50
  -7   1 -26    2.65    0.49
  -8  -1 -26    9.63    1.12
   8  -1  26    6.92    1.04
   8   1  26    8.19    1.22
  -8   1 -26   10.11    1.11
  -9  -1 -26    1.50    0.46
   9  -1  26    1.01    0.37
   9   1  26    1.18    0.45
  -9   1 -26    1.46    0.44
   9  -2 -26    0.26    0.28
  -9  -2  26    0.99    0.28
  -9   2  26    0.31    0.21
  -8  -2  26    6.69    0.82
   8  -2 -26    6.33    1.05
  -8   2  26    7.03    0.84
   8   2 -26    6.02    0.80
   7  -2 -26    0.39    0.27
  -7  -2  26    0.80    0.25
  -7   2  26    0.66    0.24
   7   2 -26    1.24    0.27
   6  -2 -26   23.36    2.68
  -6  -2  26   29.13    2.57
   6   2 -26   21.54    2.52
  -6   2  26   23.72    2.54
  -5  -2  26    0.34    0.16
  -5  -2  26    0.26    0.16
   5  -2 -26    0.62    0.28
   5  -2 -26    0.29    0.13
  -5   2  26    0.22    0.14
   5   2 -26    0.58    0.18
   4  -2 -26    6.27    0.74
  -4  -2  26    6.89    0.78
  -4  -2  26    6.50    0.82
   4  -2 -26    8.22    0.97
  -4   2  26    6.94    0.80
   4   2 -26    6.32    0.77
   3  -2 -26    2.07    0.32
  -3  -2  26    2.32    0.37
   3  -2 -26    1.83    0.45
  -3  -2  26    1.95    0.39
  -3   2  26    2.28    0.38
   3   2 -26    2.24    0.36
  -2  -2  26    0.49    0.17
   2  -2 -26    0.82    0.30
   2  -2 -26    0.78    0.19
   2   2 -26    0.61    0.18
  -2   2  26    0.79    0.21
   1  -2 -26    4.92    0.55
  -1  -2  26    4.61    0.56
   1  -2 -26    5.01    0.67
   1   2 -26    4.38    0.55
  -1   2  26    3.95    0.56
   0  -2 -26   19.44    2.02
   0  -2  26   23.15    2.05
   0   2 -26   17.97    2.01
   0   2  26   17.54    2.02
   1  -2  26   22.91    2.68
  -1  -2 -26   27.29    2.70
  -1   2 -26   25.53    2.67
   1   2  26   29.02    2.72
   2  -2  26   40.18    3.83
  -2   2 -26   39.00    3.81
   2   2  26   33.13    3.83
  -3  -2 -26    1.60    0.30
   3  -2  26    0.95    0.25
  -3   2 -26    0.74    0.22
   3   2  26    0.98    0.28
  -4  -2 -26    8.17    0.92
   4  -2  26    7.35    0.89
   4   2  26    7.25    0.93
  -4   2 -26    7.39    0.89
   5  -2  26    0.15    0.16
  -5  -2 -26    0.31    0.19
  -5   2 -26    0.18    0.18
   5   2  26    0.20    0.18
  -6  -2 -26   48.12    5.35
   6  -2  26   56.28    5.37
   6   2  26   58.74    5.43
  -6   2 -26   47.56    5.34
  -7  -2 -26   -0.10    0.20
  -7   2 -26    0.20    0.18
   7   2  26    0.01    0.21
  -8  -2 -26   10.17    1.25
   8   2  26   11.04    1.29
  -8   2 -26    9.48    1.22
   8  -3 -26   20.87    2.27
  -8   3  26   17.14    2.02
   8   3 -26   19.18    2.02
   7  -3 -26    8.05    1.23
  -7   3  26    7.42    0.94
   7   3 -26    7.80    0.92
   6  -3 -26    1.15    0.44
   6   3 -26    1.71    0.34
  -6   3  26    1.46    0.35
  -5  -3  26    2.83    0.50
   5  -3 -26    3.01    0.62
  -5  -3  26    2.56    0.44
   5   3 -26    2.67    0.43
  -5   3  26    2.32    0.43
   4  -3 -26   11.40    1.51
  -4  -3  26   10.88    1.33
  -4  -3  26   13.35    1.45
   4   3 -26   13.16    1.35
  -4   3  26   13.36    1.37
   3  -3 -26   26.18    3.03
  -3  -3  26   29.45    2.87
  -3  -3  26   25.76    2.95
  -3   3  26   28.72    2.89
   3   3 -26   28.54    2.87
   2  -3 -26   10.80    1.18
  -2  -3  26    9.97    1.10
   2   3 -26    8.30    0.98
  -2   3  26    8.06    1.00
  -1  -3  26    0.01    0.14
   1  -3 -26    0.23    0.19
  -1   3  26    0.04    0.10
   1   3 -26    0.17    0.12
   0  -3 -26    0.41    0.21
   0  -3  26    0.46    0.22
   0   3  26    0.20    0.14
   0   3 -26    0.22    0.13
   1  -3  26    3.20    0.56
  -1  -3 -26    2.46    0.51
   1   3  26    2.83    0.46
  -1   3 -26    2.83    0.42
  -2  -3 -26   22.49    2.18
  -2   3 -26   19.48    2.05
   2   3  26   17.55    2.08
  -3  -3 -26    1.71    0.39
  -3   3 -26    1.81    0.34
   3   3  26    1.24    0.34
   4   3  26   31.10    3.32
  -4   3 -26   32.12    3.28
  -5   3 -26    2.19    0.43
   5   3  26    2.59    0.51
   6   3  26    1.05    0.36
  -6   3 -26    0.65    0.26
   7   3  26    0.12    0.25
   8  -3  26    7.67    1.07
   8   3  26    8.83    1.14
  -8   3 -26    8.66    1.08
   7  -4 -26    1.56    0.57
  -7   4  26    2.13    0.43
   7   4 -26    2.78    0.46
   6  -4 -26   12.25    1.64
  -6   4  26   14.36    1.47
   6   4 -26   11.96    1.41
  -5  -4  26    6.77    1.06
   5  -4 -26    7.91    1.24
   5   4 -26    8.16    0.92
  -5   4  26    7.82    0.91
  -4  -4  26    6.03    0.97
   4  -4 -26    8.48    1.05
  -4   4  26    5.55    0.79
   4   4 -26    7.63    0.82
  -3  -4  26    0.39    0.22
   3  -4 -26    0.24    0.25
   3   4 -26    0.04    0.11
  -3   4  26    0.17    0.16
  -2  -4  26    0.69    0.31
   2  -4 -26    0.62    0.30
  -2   4  26    0.84    0.25
   2   4 -26    0.48    0.17
   1  -4 -26    3.02    0.63
  -1  -4  26    3.30    0.63
  -1   4  26    3.49    0.52
   1   4 -26    3.39    0.49
   0  -4 -26   18.96    2.33
   0  -4  26   23.13    2.36
   0   4 -26   21.79    2.20
   0   4  26   20.29    2.20
  -1  -4 -26   12.27    1.37
   1  -4  26   12.91    1.39
  -1   4 -26    9.87    1.19
   1   4  26   10.72    1.23
   2  -4  26   10.19    1.35
  -2  -4 -26   11.28    1.36
   2   4  26   11.26    1.27
  -2   4 -26   11.90    1.23
   3  -4  26    3.22    0.61
   3   4  26    3.52    0.56
  -3   4 -26    2.68    0.46
   4  -4  26    0.25    0.22
  -4   4 -26    0.29    0.17
   4   4  26    0.30    0.23
   5  -4  26    2.52    0.53
   5   4  26    3.02    0.55
  -5   4 -26    1.82    0.39
   6  -4  26   14.94    1.73
  -6   4 -26   12.90    1.62
   6   4  26   17.28    1.76
   6  -5 -26    2.10    0.65
   5  -5 -26    1.90    0.62
  -5  -5  26    2.56    0.56
   5   5 -26    2.34    0.43
  -4  -5  26    7.18    1.11
   4  -5 -26    9.02    1.33
   4   5 -26    7.05    0.87
  -3  -5  26   17.19    2.00
   3  -5 -26   20.20    2.14
   3   5 -26   15.62    1.89
   2  -5 -26   14.13    1.75
  -2  -5  26   14.28    1.70
  -1  -5  26    0.72    0.32
   1  -5 -26    0.81    0.36
   0  -5  26    0.55    0.28
   0  -5 -26    0.99    0.38
   1  -5  26    6.95    1.12
  -1  -5 -26    8.05    1.05
   2  -5  26    3.35    0.69
   3  -5  26    5.76    0.97
   4  -5  26    5.24    0.90
   5  -5  26    0.63    0.33
   5   5  26    0.65    0.32
  -2  -6  26    3.13    0.68
   2  -6 -26    1.84    0.58
   1  -6 -26    3.43    0.75
  -1  -6  26    3.14    0.73
   0  -6 -26   15.72    1.75
   0  -6  26   11.93    1.68
   1  -6  26    8.49    1.31
  -9   0  27   20.76    2.07
   9   0 -27   17.30    2.01
  -8   0  27    0.39    0.21
   8   0 -27   -0.09    0.16
   8   0 -27    0.17    0.17
   7   0 -27    5.40    0.72
   7   0 -27    5.65    0.91
  -7   0  27    7.29    0.79
   6   0 -27    0.15    0.19
  -6   0  27    0.12    0.15
   6   0 -27    0.38    0.15
  -5   0  27    0.09    0.13
   5   0 -27    0.13    0.13
   4   0 -27    0.20    0.12
  -4   0  27    0.25    0.14
  -3   0  27   64.61    6.99
   3   0 -27   74.26    6.97
  -2   0  27    0.23    0.13
   2   0 -27    0.28    0.11
   1   0 -27   84.79    7.62
  -1   0  27   67.38    7.62
   0   0 -27    0.63    0.16
   0   0  27    0.79    0.21
   1   0  27   18.60    2.05
  -1   0 -27   19.96    2.02
  -2   0 -27    0.14    0.12
   2   0  27    0.36    0.16
  -3   0 -27   47.53    4.79
   3   0  27   46.73    4.82
  -4   0 -27   -0.07    0.11
   4   0  27   -0.12    0.13
   5   0  27   12.08    1.40
  -6   0 -27    0.20    0.16
   6   0  27    0.49    0.25
   7   0  27    4.32    0.74
  -7   0 -27    4.36    0.73
  -8   0 -27   -0.07    0.17
   8   0  27    0.14    0.24
   9   0  27   11.88    1.55
  -9   0 -27   14.37    1.61
   9  -1 -27    0.18    0.26
   9  -1 -27    0.47    0.20
  -9  -1  27    0.19    0.20
  -9   1  27    0.19    0.22
   9   1 -27    0.36    0.19
   8  -1 -27    0.06    0.18
   8  -1 -27    0.18    0.13
  -8  -1  27    0.18    0.18
  -8   1  27    0.27    0.19
   7  -1 -27   19.41    2.59
  -7  -1  27   20.96    2.50
   7   1 -27   25.44    2.59
   7   1 -27   25.95    2.48
  -7   1  27   26.05    2.51
   6  -1 -27    5.43    0.67
   6  -1 -27    4.82    0.85
  -6  -1  27    6.31    0.71
  -6   1  27    6.02    0.70
   6   1 -27    4.71    0.65
   5  -1 -27   21.71    2.58
  -5  -1  27   30.80    2.66
   5  -1 -27   23.86    2.74
  -5   1  27   23.98    2.63
   5   1 -27   26.90    2.61
   4  -1 -27    1.63    0.27
   4  -1 -27    1.20    0.36
  -4  -1  27    1.38    0.29
   4   1 -27    1.65    0.29
  -4   1  27    1.07    0.28
  -3  -1  27    0.39    0.16
   3  -1 -27    0.43    0.14
   3   1 -27    0.64    0.18
  -3   1  27    0.39    0.17
  -2  -1  27    0.16    0.11
   2  -1 -27    0.05    0.08
   2   1 -27    0.31    0.13
  -2   1  27    0.02    0.11
  -1  -1  27   34.25    3.71
   1  -1 -27   32.80    3.68
  -1   1  27   37.37    3.72
   1   1 -27   41.61    3.71
   0  -1  27    1.21    0.28
   0  -1 -27    1.34    0.26
   0   1  27    0.97    0.25
   0   1 -27    1.06    0.23
  -1  -1 -27   65.18    6.72
   1  -1  27   61.45    6.73
   1   1  27   74.77    6.76
   2  -1  27    1.70    0.36
  -2  -1 -27    2.09    0.37
  -2   1 -27    1.57    0.32
   2   1  27    2.51    0.41
   3  -1  27    0.32    0.19
  -3  -1 -27    0.24    0.17
   3   1  27    0.37    0.18
  -3   1 -27    0.31    0.17
   4  -1  27    0.80    0.24
  -4  -1 -27    0.55    0.19
   4   1  27    0.43    0.21
  -4   1 -27    0.53    0.21
   5  -1  27   35.25    3.49
  -5  -1 -27   33.29    3.47
  -5   1 -27   28.44    3.44
   5   1  27   37.17    3.52
   6  -1  27    0.99    0.31
  -6  -1 -27    0.57    0.27
   6   1  27    0.34    0.26
  -7  -1 -27   16.55    2.07
   7  -1  27   19.56    2.09
   7   1  27   17.77    2.11
  -7   1 -27   21.98    2.12
  -8  -1 -27    0.21    0.24
   8  -1  27   -0.02    0.18
  -8   1 -27    0.52    0.25
   8   1  27    0.12    0.24
  -9  -2  27    8.39    1.06
   9  -2 -27    8.34    1.31
   9   2 -27    8.39    1.03
  -9   2  27    9.38    1.06
  -8  -2  27    1.70    0.38
   8  -2 -27    1.14    0.44
   8   2 -27    1.60    0.35
  -8   2  27    1.47    0.37
  -7  -2  27    3.85    0.60
   7  -2 -27    4.11    0.76
  -7   2  27    3.71    0.60
   7   2 -27    3.71    0.58
   6  -2 -27    0.36    0.23
  -6  -2  27    0.12    0.16
  -6   2  27    0.12    0.14
   6   2 -27    0.70    0.20
   5  -2 -27    0.39    0.15
  -5  -2  27    0.68    0.24
   5  -2 -27    0.49    0.27
  -5  -2  27    0.73    0.22
  -5   2  27    0.75    0.22
   5   2 -27    0.86    0.22
  -4  -2  27    0.85    0.26
   4  -2 -27    1.14    0.37
  -4  -2  27    0.86    0.24
   4  -2 -27    1.15    0.22
  -4   2  27    0.88    0.25
   4   2 -27    1.07    0.24
   3  -2 -27   17.96    1.82
  -3  -2  27   19.18    1.85
   3  -2 -27   19.48    2.01
  -3  -2  27   14.28    1.88
  -3   2  27   17.52    1.85
   3   2 -27   16.96    1.83
   2  -2 -27    3.66    0.45
   2  -2 -27    3.93    0.67
  -2  -2  27    3.06    0.49
  -2   2  27    3.72    0.55
   2   2 -27    3.58    0.46
   1  -2 -27   24.06    2.47
  -1  -2  27   25.46    2.49
  -1   2  27   23.14    2.49
   1   2 -27   23.30    2.47
   0  -2  27    0.63    0.19
   0  -2 -27    0.86    0.21
   0   2 -27    0.65    0.18
   0   2  27    0.61    0.20
   1  -2  27   38.57    4.39
  -1  -2 -27   43.54    4.40
   1   2  27   42.83    4.41
  -1   2 -27   48.35    4.39
   2  -2  27    0.08    0.13
   2   2  27    0.18    0.15
  -2   2 -27    0.19    0.12
   3  -2  27   51.01    5.37
  -3  -2 -27   50.54    5.37
  -3   2 -27   57.32    5.36
  -4  -2 -27   -0.06    0.12
   4  -2  27    0.17    0.18
   4   2  27    0.18    0.18
  -4   2 -27   -0.15    0.11
   5  -2  27   14.96    1.64
  -5  -2 -27   17.18    1.70
  -5   2 -27   11.82    1.62
   5   2  27   17.36    1.73
   6  -2  27    2.81    0.56
  -6  -2 -27    3.17    0.57
  -6   2 -27    3.84    0.61
   6   2  27    3.96    0.66
  -7  -2 -27    1.03    0.36
   7   2  27   -0.03    0.22
  -7   2 -27    0.81    0.28
  -8  -2 -27    0.36    0.27
  -8   2 -27    0.15    0.20
   8   2  27   -0.08    0.22
   8  -3 -27    8.36    1.38
  -8   3  27    9.51    1.12
   8   3 -27    9.41    1.08
   7  -3 -27    7.99    1.27
   7   3 -27    8.17    0.99
  -7   3  27    8.93    1.01
   6  -3 -27   10.07    1.24
  -6   3  27    8.55    1.04
   6   3 -27    8.64    1.02
  -5  -3  27   15.70    1.50
   5  -3 -27   12.04    1.55
  -5   3  27   11.48    1.38
   5   3 -27   12.34    1.38
  -4  -3  27    1.10    0.35
   4  -3 -27    1.52    0.43
  -4   3  27    1.05    0.27
   4   3 -27    1.88    0.32
  -3  -3  27    0.49    0.22
   3  -3 -27    0.10    0.19
  -3   3  27    0.28    0.15
   3   3 -27    0.24    0.14
   2  -3 -27   -0.17    0.07
  -2  -3  27    0.43    0.20
  -2   3  27    0.22    0.14
   2   3 -27    0.13    0.10
  -1  -3  27   26.99    3.14
  -1   3  27   27.45    3.06
   1   3 -27   34.36    3.06
   0  -3  27    3.20    0.58
   0  -3 -27    2.70    0.56
   0   3  27    2.68    0.45
   0   3 -27    3.18    0.45
  -1  -3 -27   51.63    4.51
   1  -3  27   37.28    4.42
   1   3  27   37.65    4.36
  -1   3 -27   46.21    4.35
  -2  -3 -27    1.71    0.47
   2   3  27    3.61    0.52
  -2   3 -27    2.97    0.44
  -3  -3 -27    0.06    0.17
   3   3  27    0.01    0.14
  -3   3 -27    0.03    0.12
   4   3  27    1.59    0.39
  -4   3 -27    1.75    0.35
   5   3  27   15.17    1.74
  -5   3 -27   15.30    1.68
   6   3  27    1.50    0.42
  -6   3 -27    1.19    0.33
   7   3  27   16.63    1.92
   7  -4 -27    1.72    0.56
   7   4 -27    1.38    0.33
  -7   4  27    0.91    0.30
   6  -4 -27    0.77    0.37
  -6   4  27    0.46    0.21
   6   4 -27    0.74    0.23
  -5  -4  27    2.12    0.51
   5  -4 -27    2.76    0.64
  -5   4  27    1.91    0.40
   5   4 -27    2.29    0.41
   4  -4 -27    5.72    0.99
  -4  -4  27    5.81    0.89
  -4   4  27    5.22    0.70
   4   4 -27    6.05    0.72
  -3  -4  27   28.16    3.62
   3  -4 -27   41.04    3.82
   3   4 -27   36.49    3.54
  -3   4  27   33.94    3.54
   2  -4 -27   12.63    1.48
  -2  -4  27   11.79    1.41
   2   4 -27   12.61    1.28
  -2   4  27    9.75    1.25
   1  -4 -27   19.58    1.98
  -1  -4  27   16.32    1.89
   1   4 -27   14.12    1.73
  -1   4  27   17.64    1.77
   0  -4 -27    0.78    0.33
   0  -4  27    0.93    0.35
   0   4 -27    1.12    0.26
   0   4  27    1.79    0.32
   1  -4  27    4.77    0.82
  -1  -4 -27    5.87    0.89
  -1   4 -27    4.67    0.62
   1   4  27    5.84    0.67
   2  -4  27    3.09    0.60
  -2  -4 -27    3.61    0.64
   2   4  27    2.97    0.52
  -2   4 -27    3.21    0.48
   3  -4  27   26.38    2.98
  -3   4 -27   28.42    2.86
   3   4  27   27.43    2.90
   4  -4  27    3.05    0.65
   4   4  27    3.81    0.66
  -4   4 -27    4.53    0.61
   5  -4  27    3.26    0.69
  -5   4 -27    4.79    0.66
   5   4  27    4.58    0.76
   6  -4  27    0.40    0.27
   6   4  27    0.89    0.34
  -6   4 -27    0.44    0.21
   5  -5 -27    9.36    1.53
  -5  -5  27    9.26    1.31
   5   5 -27   11.37    1.20
   4  -5 -27    0.41    0.34
  -4  -5  27    0.17    0.26
   4   5 -27    0.25    0.17
   3  -5 -27    0.00    0.24
  -3  -5  27    0.23    0.23
   3   5 -27    0.07    0.14
  -2  -5  27    3.84    0.73
   2  -5 -27    3.69    0.78
  -1  -5  27    5.31    0.90
   1  -5 -27    5.32    0.95
   0  -5  27    6.46    0.99
   0  -5 -27    5.02    0.91
   1  -5  27   13.91    1.64
  -1  -5 -27   12.53    1.59
   2  -5  27    1.41    0.46
   3  -5  27    2.62    0.61
   4  -5  27    0.16    0.22
   4   5  27    0.15    0.25
   9   0 -28    0.24    0.19
  -9   0  28    0.91    0.28
   8   0 -28    2.34    0.52
   8   0 -28    2.01    0.38
  -8   0  28    1.99    0.44
   7   0 -28   -0.01    0.15
   7   0 -28    0.18    0.15
  -7   0  28   -0.13    0.13
  -6   0  28   54.93    5.18
   6   0 -28   47.94    5.25
   6   0 -28   49.12    5.12
  -5   0  28    0.12    0.15
   5   0 -28    0.22    0.13
   4   0 -28   32.81    3.21
  -4   0  28   29.72    3.23
   3   0 -28    0.32    0.13
  -3   0  28    0.53    0.18
  -2   0  28   53.62    6.12
   2   0 -28   67.99    6.11
  -1   0  28    0.28    0.14
   1   0 -28    0.23    0.12
   0   0 -28   73.85    7.77
   0   0  28   81.97    7.81
  -1   0 -28    0.17    0.13
   1   0  28    0.18    0.14
  -2   0 -28    2.41    0.42
   2   0  28    2.77    0.46
  -3   0 -28    0.82    0.23
   3   0  28    0.80    0.23
  -4   0 -28    3.24    0.56
   4   0  28    3.88    0.61
   5   0  28    0.30    0.20
   6   0  28   11.12    1.15
  -6   0 -28    7.35    1.06
  -7   0 -28    0.06    0.19
   7   0  28    0.05    0.20
  -8   0 -28    2.53    0.57
   8   0  28    2.78    0.56
   9  -1 -28   -0.16    0.24
   9  -1 -28    0.08    0.14
  -9  -1  28    0.03    0.20
  -9   1  28    0.04    0.16
   9   1 -28    0.17    0.18
   8  -1 -28   17.29    1.84
   8  -1 -28   14.89    1.63
  -8  -1  28   14.67    1.68
  -8   1  28   14.62    1.66
   8   1 -28   14.72    1.65
   7  -1 -28    0.02    0.18
   7  -1 -28    0.19    0.15
  -7  -1  28    0.26    0.17
   7   1 -28    0.02    0.17
  -7   1  28    0.33    0.18
   7   1 -28    0.38    0.18
  -6  -1  28    0.08    0.16
   6  -1 -28    0.17    0.13
   6  -1 -28    0.68    0.29
   6   1 -28    0.36    0.16
  -6   1  28    0.24    0.18
   5  -1 -28    0.09    0.10
   5  -1 -28   -0.01    0.17
  -5  -1  28    0.22    0.16
   5   1 -28    0.04    0.10
  -5   1  28    0.35    0.18
   4  -1 -28   47.93    5.15
   4  -1 -28   50.19    5.32
  -4  -1  28   49.71    5.19
  -4   1  28   59.26    5.21
   4   1 -28   49.90    5.17
   3  -1 -28    0.64    0.18
  -3  -1  28    0.86    0.23
   3   1 -28    0.73    0.20
  -3   1  28    0.91    0.25
   2  -1 -28   22.91    2.45
  -2  -1  28   23.31    2.48
  -2   1  28   25.66    2.49
  -1  -1  28    3.14    0.50
   1  -1 -28    3.29    0.44
   1   1 -28    3.30    0.49
  -1   1  28    3.99    0.48
   0  -1  28    0.63    0.21
   0  -1 -28    0.63    0.19
   0   1  28    0.85    0.24
   0   1 -28    1.24    0.23
  -1  -1 -28    0.54    0.17
   1  -1  28    0.60    0.19
   1   1  28    0.79    0.23
  -1   1 -28    0.39    0.15
   2  -1  28   21.99    2.09
  -2  -1 -28   16.16    2.04
   2   1  28   17.08    2.06
  -2   1 -28   23.19    2.06
  -3  -1 -28    4.84    0.67
   3  -1  28    5.11    0.76
   3   1  28    5.45    0.70
  -3   1 -28    5.52    0.67
   4  -1  28   24.11    2.45
   4   1  28   20.47    2.44
  -4   1 -28   23.90    2.42
  -5  -1 -28    0.26    0.18
   5  -1  28    0.33    0.20
  -5   1 -28    0.34    0.18
   5   1  28    0.24    0.20
  -6  -1 -28    0.21    0.20
   6  -1  28    0.18    0.23
   6   1  28    0.43    0.26
   7  -1  28    0.71    0.29
  -7  -1 -28    1.06    0.32
  -7   1 -28    0.63    0.27
   7   1  28    0.98    0.34
  -8  -1 -28    4.70    0.88
   8  -1  28    6.57    0.93
   8   1  28    6.88    0.97
  -8   1 -28    5.70    0.91
   9  -2 -28    0.06    0.24
  -9  -2  28    0.45    0.22
  -9   2  28    1.18    0.31
   9   2 -28    0.15    0.17
  -8  -2  28    1.43    0.39
   8  -2 -28    3.11    0.66
   8   2 -28    2.27    0.42
  -8   2  28    1.99    0.43
  -7  -2  28    0.60    0.23
   7  -2 -28    0.54    0.31
  -7   2  28    0.32    0.20
   7   2 -28    0.62    0.21
   6  -2 -28   27.33    3.53
  -6  -2  28   34.70    3.43
   6   2 -28   31.89    3.38
  -6   2  28   37.16    3.43
   5  -2 -28    0.45    0.26
  -5  -2  28    0.16    0.15
  -5  -2  28    0.18    0.18
   5  -2 -28    0.33    0.13
   5   2 -28    0.29    0.15
  -5   2  28    0.31    0.16
  -4  -2  28   17.38    1.55
   4  -2 -28   12.64    1.47
  -4  -2  28   14.55    1.58
   4  -2 -28   13.88    1.68
   4   2 -28   13.35    1.51
  -4   2  28   13.77    1.53
   3  -2 -28    1.79    0.29
   3  -2 -28    1.53    0.43
  -3  -2  28    1.76    0.39
  -3  -2  28    1.46    0.31
  -3   2  28    1.58    0.33
   3   2 -28    2.11    0.34
   2  -2 -28   34.40    4.11
  -2  -2  28   43.23    4.01
   2  -2 -28   36.78    3.97
   2   2 -28   37.69    3.98
  -2   2  28   44.23    4.02
  -1  -2  28    3.02    0.44
   1  -2 -28    1.86    0.37
  -1   2  28    3.28    0.46
   1   2 -28    2.64    0.41
   0  -2  28   42.66    4.61
   0  -2 -28   41.51    4.60
   0   2  28   44.51    4.63
   0   2 -28   53.95    4.63
  -1  -2 -28    0.52    0.19
   1  -2  28    0.41    0.17
   1   2  28    0.55    0.20
  -1   2 -28    0.48    0.17
   2  -2  28    5.19    0.70
  -2   2 -28    5.97    0.69
   2   2  28    6.05    0.73
   3  -2  28    0.66    0.21
  -3  -2 -28    0.93    0.22
   3   2  28    0.41    0.20
  -3   2 -28    0.48    0.18
   4  -2  28    1.64    0.34
  -4  -2 -28    1.24    0.34
  -4   2 -28    1.74    0.35
   4   2  28    1.54    0.39
  -5  -2 -28    3.21    0.57
   5  -2  28    3.28    0.55
   5   2  28    3.45    0.61
  -5   2 -28    2.94    0.54
  -6  -2 -28   26.21    2.62
  -6   2 -28   22.55    2.60
   6   2  28   24.24    2.66
  -7  -2 -28    3.54    0.64
   7   2  28    2.83    0.59
  -8  -2 -28    6.38    1.00
   8   2  28    6.26    0.99
  -8   2 -28    6.84    1.00
   8  -3 -28    9.31    1.29
  -8   3  28    8.92    1.09
   8   3 -28    9.26    1.08
   7  -3 -28    0.04    0.26
  -7   3  28    0.13    0.16
   7   3 -28    0.06    0.14
   6  -3 -28    0.01    0.22
   6   3 -28   -0.10    0.10
  -6   3  28   -0.14    0.12
  -5  -3  28    1.37    0.36
   5  -3 -28    2.49    0.58
  -5   3  28    1.43    0.33
   5   3 -28    1.52    0.32
  -4  -3  28   25.01    2.69
   4  -3 -28   23.07    2.78
  -4   3  28   29.25    2.63
   4   3 -28   22.58    2.58
  -3  -3  28    0.55    0.25
   3  -3 -28    0.26    0.22
   3   3 -28    0.39    0.16
  -3   3  28    0.42    0.20
   2  -3 -28   51.27    4.64
  -2  -3  28   44.08    4.51
  -2   3  28   39.17    4.41
   2   3 -28   42.15    4.40
   1  -3 -28    0.99    0.36
  -1  -3  28    1.22    0.33
  -1   3  28    1.30    0.28
   1   3 -28    0.86    0.24
   0  -3 -28    0.22    0.18
   0  -3  28   -0.09    0.13
   0   3  28    0.14    0.14
   0   3 -28   -0.02    0.09
  -1  -3 -28    0.57    0.24
   1  -3  28    0.09    0.15
   1   3  28    0.29    0.17
  -1   3 -28    0.33    0.14
  -2  -3 -28   25.80    2.86
  -2   3 -28   26.25    2.75
   2   3  28   27.75    2.80
  -3  -3 -28    4.65    0.85
  -3   3 -28    6.79    0.76
   3   3  28    6.87    0.81
  -4   3 -28   16.52    1.77
   4   3  28   15.97    1.81
   5   3  28    4.26    0.73
  -5   3 -28    3.81    0.63
   6   3  28    0.05    0.22
  -6   3 -28   -0.10    0.14
   7   3  28    1.79    0.49
   7  -4 -28    2.29    0.65
  -7   4  28    2.13    0.44
   7   4 -28    2.65    0.47
   6  -4 -28   29.57    3.77
   6   4 -28   36.75    3.59
  -6   4  28   35.81    3.60
  -5  -4  28   10.21    1.22
   5  -4 -28    8.48    1.40
   5   4 -28    9.62    1.10
  -5   4  28    9.69    1.13
  -4  -4  28   11.18    1.23
   4  -4 -28    9.88    1.31
   4   4 -28    9.93    1.09
  -4   4  28    8.24    1.08
  -3  -4  28    0.49    0.23
   3  -4 -28    0.25    0.25
   3   4 -28    0.15    0.15
  -3   4  28    0.01    0.14
   2  -4 -28   10.07    1.38
  -2  -4  28    9.97    1.33
  -2   4  28   11.41    1.24
   2   4 -28   11.61    1.21
  -1  -4  28   13.52    1.49
   1  -4 -28   12.12    1.49
   1   4 -28   11.85    1.30
  -1   4  28   11.07    1.31
   0  -4  28   18.43    2.05
   0  -4 -28   20.80    2.11
   0   4  28   17.99    1.91
   0   4 -28   16.13    1.88
  -1  -4 -28    5.29    0.81
   1  -4  28    5.19    0.82
  -1   4 -28    4.23    0.56
   1   4  28    3.82    0.62
   2  -4  28    4.02    0.70
  -2  -4 -28    3.07    0.64
  -2   4 -28    3.69    0.49
   2   4  28    3.46    0.57
   3  -4  28    0.21    0.22
  -3   4 -28    0.10    0.14
   3   4  28    0.10    0.17
   4  -4  28    2.95    0.62
  -4   4 -28    3.64    0.56
   4   4  28    3.71    0.64
   5  -4  28    4.04    0.79
   5   4  28    5.55    0.84
  -5   4 -28    5.14    0.74
   6  -4  28   11.32    1.25
  -6   4 -28    8.73    1.10
   6   4  28    8.03    1.16
  -5  -5  28    0.87    0.41
   5  -5 -28    0.90    0.48
   5   5 -28    1.88    0.38
  -4  -5  28   11.34    1.52
   4  -5 -28   11.96    1.61
   4   5 -28   12.53    1.35
   3  -5 -28    1.51    0.51
  -3  -5  28    1.64    0.47
   3   5 -28    1.84    0.35
  -2  -5  28    8.48    1.25
   2  -5 -28    8.31    1.30
   1  -5 -28    2.46    0.62
  -1  -5  28    2.58    0.58
   0  -5 -28    0.12    0.25
   0  -5  28    0.26    0.24
   1  -5  28    0.91    0.35
  -1  -5 -28    0.30    0.28
   2  -5  28    9.69    1.28
   3  -5  28   11.87    1.51
   4  -5  28    6.36    1.01
   4   5  28    5.42    0.88
  -9   0  29   12.32    1.33
   9   0 -29    9.91    1.26
   8   0 -29    0.18    0.15
   8   0 -29   -0.03    0.18
  -8   0  29    0.09    0.16
  -7   0  29   -0.10    0.15
   7   0 -29    0.00    0.12
   7   0 -29   -0.12    0.15
  -6   0  29    0.62    0.21
   6   0 -29    0.40    0.17
   6   0 -29    0.02    0.20
  -5   0  29   22.34    2.29
   5   0 -29   20.92    2.25
  -4   0  29    0.23    0.15
   4   0 -29    0.23    0.13
  -3   0  29   34.72    4.12
   3   0 -29   46.16    4.11
  -2   0  29    0.62    0.19
   2   0 -29    0.48    0.16
   1   0 -29   12.45    1.27
  -1   0  29   11.02    1.28
   0   0 -29    0.93    0.21
   0   0  29    0.79    0.21
   1   0  29   12.77    1.49
  -1   0 -29   14.38    1.47
   2   0  29    0.16    0.16
  -2   0 -29    0.00    0.12
  -3   0 -29   56.16    5.36
   3   0  29   49.11    5.37
   4   0  29   -0.12    0.14
  -4   0 -29   -0.04    0.13
   5   0  29   15.28    1.72
   6   0  29    0.58    0.27
  -6   0 -29    0.36    0.23
  -7   0 -29    7.00    0.90
   7   0  29    6.33    0.97
  -8   0 -29   -0.12    0.21
   8   0  29   -0.03    0.19
   9  -1 -29    1.93    0.53
   9  -1 -29    1.39    0.33
  -9  -1  29    0.92    0.33
  -9   1  29    1.33    0.38
   9   1 -29    1.52    0.34
   8  -1 -29    0.13    0.14
   8  -1 -29    0.54    0.31
  -8  -1  29    0.74    0.27
  -8   1  29    0.88    0.27
   8   1 -29    0.17    0.17
   7  -1 -29   30.33    3.47
  -7  -1  29   35.06    3.37
  -7   1  29   31.33    3.35
   7   1 -29   31.56    3.32
   7   1 -29   32.45    3.44
  -6  -1  29    0.20    0.16
   6  -1 -29    0.28    0.24
   6  -1 -29    0.21    0.13
  -6   1  29    0.41    0.20
   6   1 -29    0.28    0.17
   5  -1 -29   14.74    1.73
  -5  -1  29   20.47    1.84
   5   1 -29   15.11    1.75
  -5   1  29   17.79    1.80
   4  -1 -29    0.42    0.25
   4  -1 -29    0.91    0.22
  -4  -1  29    1.45    0.28
   4   1 -29    1.27    0.25
  -4   1  29    0.95    0.25
  -3  -1  29    0.53    0.19
   3  -1 -29    0.23    0.13
  -3   1  29    0.45    0.19
   3   1 -29    0.33    0.15
  -2  -1  29    2.45    0.42
   2  -1 -29    3.08    0.37
   2   1 -29    2.96    0.42
  -2   1  29    2.06    0.42
  -1  -1  29   21.26    2.40
   1  -1 -29   26.64    2.40
   1   1 -29   19.87    2.37
  -1   1  29   25.19    2.42
   0  -1 -29    7.92    0.80
   0  -1  29    5.83    0.80
   0   1  29    5.91    0.80
   0   1 -29    7.66    0.80
   1  -1  29   18.84    2.01
  -1  -1 -29   17.13    1.97
   1   1  29   23.68    2.05
  -1   1 -29   17.07    1.97
   2  -1  29    0.12    0.13
  -2  -1 -29    0.31    0.16
  -2   1 -29    0.36    0.16
   2   1  29    0.28    0.16
   3  -1  29    4.33    0.69
  -3  -1 -29    4.73    0.63
   3   1  29    5.33    0.73
  -3   1 -29    4.64    0.67
   4  -1  29    3.08    0.58
   4   1  29    3.51    0.62
  -4   1 -29    4.55    0.62
  -5  -1 -29   12.45    1.42
   5  -1  29   12.34    1.43
   5   1  29   13.35    1.46
  -5   1 -29   11.64    1.40
  -6  -1 -29    0.12    0.19
   6  -1  29    0.10    0.19
[truncated: 67,576 more chars]
