# Supplementary material
Source: MDPI journal article supplement (https://www.mdpi.com/2304-6740/7/10/119)
Supplement: s1 [file s1 › inorganics-601277-supplementary-final/dwat21_0m_a_sq.cif]

data_dwat21_0m_a_sq
_audit_creation_date              2017-03-07
_audit_creation_method
;
Olex2 1.2-beta
(compiled 2017.03.02 svn.r3394 for OlexSys, GUI svn.r5324)
;
_shelx_SHELXL_version_number      '2016/6'
_publ_contact_author_address      ?
_publ_contact_author_email        ?
_publ_contact_author_id_orcid     ?
_publ_contact_author_name         ''
_publ_contact_author_phone        ?
_publ_section_references
;
Dolomanov, O.V., Bourhis, L.J., Gildea, R.J, Howard, J.A.K. & Puschmann, H.
 (2009), J. Appl. Cryst. 42, 339-341.

Sheldrick, G.M. (2015). Acta Cryst. A71, 3-8.

Sheldrick, G.M. (2015). Acta Cryst. C71, 3-8.
;
_chemical_name_common             ?
_chemical_name_systematic         ?
_chemical_formula_moiety          'C8 H3 I N2 O4, C8 H6 N2 O'
_chemical_formula_sum             'C16 H9 I N4 O5'
_chemical_formula_weight          464.17
_chemical_melting_point           ?
loop_
  _atom_type_symbol
  _atom_type_description
  _atom_type_scat_dispersion_real
  _atom_type_scat_dispersion_imag
  _atom_type_scat_source
 'C' 'C' 0.0033 0.0016 'International Tables Vol C Tables 4.2.6.8 and 6.1.1.4'
 'H' 'H' 0.0000 0.0000 'International Tables Vol C Tables 4.2.6.8 and 6.1.1.4'
 'I' 'I' -0.4742 1.8119 'International Tables Vol C Tables 4.2.6.8 and 6.1.1.4'
 'N' 'N' 0.0061 0.0033 'International Tables Vol C Tables 4.2.6.8 and 6.1.1.4'
 'O' 'O' 0.0106 0.0060 'International Tables Vol C Tables 4.2.6.8 and 6.1.1.4'

_shelx_space_group_comment
;
The symmetry employed for this shelxl refinement is uniquely defined
by the following loop, which should always be used as a source of
symmetry information in preference to the above space-group names.
They are only intended as comments.
;
_space_group_crystal_system       'triclinic'
_space_group_IT_number            2
_space_group_name_H-M_alt         'P -1'
_space_group_name_Hall            '-P 1'
loop_
  _space_group_symop_operation_xyz
 'x, y, z'
 '-x, -y, -z'

_cell_length_a                    6.9398(10)
_cell_length_b                    16.126(2)
_cell_length_c                    18.517(3)
_cell_angle_alpha                 79.340(4)
_cell_angle_beta                  80.010(4)
_cell_angle_gamma                 89.242(4)
_cell_volume                      2005.2(5)
_cell_formula_units_Z             4
_cell_measurement_reflns_used     7029
_cell_measurement_temperature     100
_cell_measurement_theta_max       25.753
_cell_measurement_theta_min       2.273
_shelx_estimated_absorpt_T_max    0.829
_shelx_estimated_absorpt_T_min    0.641
_exptl_absorpt_coefficient_mu     1.628
_exptl_absorpt_correction_T_max   0.7454
_exptl_absorpt_correction_T_min   0.5187
_exptl_absorpt_correction_type    multi-scan
_exptl_absorpt_process_details
'SADABS-2014/5 (Bruker,2014/5) was used for absorption correction. wR2(int) was 0.0971 before and 0.0566 after correction. The Ratio of minimum to maximum transmission is 0.6959. The \l/2 correction factor is 0.00150.'
_exptl_absorpt_special_details    ?
_exptl_crystal_colour             colourless
_exptl_crystal_colour_primary     colourless
_exptl_crystal_density_diffrn     1.538
_exptl_crystal_density_meas       ?
_exptl_crystal_density_method     ?
_exptl_crystal_description        block
_exptl_crystal_F_000              904
_exptl_crystal_size_max           0.3
_exptl_crystal_size_mid           0.2
_exptl_crystal_size_min           0.12
_exptl_transmission_factor_max    ?
_exptl_transmission_factor_min    ?
_diffrn_reflns_av_R_equivalents   0.0516
_diffrn_reflns_av_unetI/netI      0.0635
_diffrn_reflns_Laue_measured_fraction_full 0.989
_diffrn_reflns_Laue_measured_fraction_max 0.973
_diffrn_reflns_limit_h_max        8
_diffrn_reflns_limit_h_min        -8
_diffrn_reflns_limit_k_max        20
_diffrn_reflns_limit_k_min        -15
_diffrn_reflns_limit_l_max        23
_diffrn_reflns_limit_l_min        -23
_diffrn_reflns_number             22950
_diffrn_reflns_point_group_measured_fraction_full 0.989
_diffrn_reflns_point_group_measured_fraction_max 0.973
_diffrn_reflns_theta_full         25.242
_diffrn_reflns_theta_max          26.452
_diffrn_reflns_theta_min          1.550
_diffrn_ambient_temperature       100
_diffrn_detector                  'Bruker APEX CCD'
_diffrn_detector_area_resol_mean  8.0
_diffrn_detector_type             'CCD Area Detector'
_diffrn_measured_fraction_theta_full 0.989
_diffrn_measured_fraction_theta_max 0.973
_diffrn_measurement_device        'Kappa Four-Circle Diffractometer'
_diffrn_measurement_device_type   'Bruker APEX-II CCD'
_diffrn_measurement_method        '\w and \f scans'
_diffrn_radiation_monochromator   graphite
_diffrn_radiation_probe           X-ray
_diffrn_radiation_type            MoK\a
_diffrn_radiation_wavelength      0.71073
_diffrn_radiation_xray_symbol     K-L~3~
_diffrn_source                    'sealed tube'
_diffrn_source_type               fine-focus
_diffrn_standards_number          0
_reflns_Friedel_coverage          0.000
_reflns_Friedel_fraction_full     .
_reflns_Friedel_fraction_max      .
_reflns_number_gt                 6152
_reflns_number_total              8062
_reflns_special_details
;
 Reflections were merged by SHELXL according to the crystal
 class for the calculation of statistics and refinement.
 
 Structure factors included contributions from the .fab file.
 
 _reflns_Friedel_fraction is defined as the number of unique
 Friedel pairs measured divided by the number that would be
 possible theoretically, ignoring centric projections and
 systematic absences.
;
_reflns_threshold_expression      'I > 2\s(I)'
_computing_cell_refinement        'SAINT v8.34A (Bruker, 2013)'
_computing_data_collection        'APEX2 v2013.6-2 (Bruker, 2013)'
_computing_data_reduction         'SAINT v8.34A (Bruker, 2013)'
_computing_molecular_graphics     'Olex2 (Dolomanov et al., 2009)'
_computing_publication_material   'Olex2 (Dolomanov et al., 2009)'
_computing_structure_refinement   'ShelXL (Sheldrick, 2015)'
_computing_structure_solution     'ShelXT (Sheldrick, 2015)'
_refine_diff_density_max          2.026
_refine_diff_density_min          -1.860
_refine_diff_density_rms          0.148
_refine_ls_extinction_coef        .
_refine_ls_extinction_method      none
_refine_ls_goodness_of_fit_ref    1.043
_refine_ls_hydrogen_treatment     constr
_refine_ls_matrix_type            full
_refine_ls_number_parameters      469
_refine_ls_number_reflns          8062
_refine_ls_number_restraints      0
_refine_ls_R_factor_all           0.0672
_refine_ls_R_factor_gt            0.0484
_refine_ls_restrained_S_all       1.043
_refine_ls_shift/su_max           0.001
_refine_ls_shift/su_mean          0.000
_refine_ls_structure_factor_coef  Fsqd
_refine_ls_weighting_details
'w=1/[\s^2^(Fo^2^)+(0.0587P)^2^+2.7855P] where P=(Fo^2^+2Fc^2^)/3'
_refine_ls_weighting_scheme       calc
_refine_ls_wR_factor_gt           0.1119
_refine_ls_wR_factor_ref          0.1220
_refine_special_details           ?
_olex2_refinement_description
;
1. Fixed Uiso
 At 1.2 times of:
  All C(H) groups
2.a Aromatic/amide H refined with riding coordinates:
 C14(H14), C16(H16), C4(H4), C30(H30), C27(H27), C12(H12), C8(H8), C26(H26),
 C22(H22), C6(H6), C32(H32), C19(H19), C25(H25), C17(H17), C31(H31), C23(H23),
 C24(H24), C18(H18)
;
_atom_sites_solution_hydrogens    geom
_atom_sites_solution_primary      dual
_atom_sites_solution_secondary    ?
loop_
  _atom_site_label
  _atom_site_type_symbol
  _atom_site_fract_x
  _atom_site_fract_y
  _atom_site_fract_z
  _atom_site_U_iso_or_equiv
  _atom_site_adp_type
  _atom_site_occupancy
  _atom_site_site_symmetry_order
  _atom_site_calc_flag
  _atom_site_refinement_flags_posn
  _atom_site_refinement_flags_adp
  _atom_site_refinement_flags_occupancy
  _atom_site_disorder_assembly
  _atom_site_disorder_group
 I2 I 0.45543(5) 0.67010(2) 0.01966(2) 0.02265(11) Uani 1 1 d . . . . .
 I1 I 0.04128(5) 0.17576(2) 0.00785(2) 0.02321(11) Uani 1 1 d . . . . .
 O10 O 1.0904(5) 0.6773(2) 0.3171(2) 0.0318(9) Uani 1 1 d . . . . .
 O7 O 0.5646(7) 0.8646(2) 0.3544(2) 0.0391(11) Uani 1 1 d . . . . .
 O8 O 0.5728(6) 0.7904(3) 0.4639(2) 0.0400(10) Uani 1 1 d . . . . .
 O1 O 0.1968(6) -0.0067(2) 0.3945(2) 0.0358(10) Uani 1 1 d . . . . .
 O2 O 0.1744(7) 0.0641(3) 0.4846(2) 0.0408(10) Uani 1 1 d . . . . .
 O6 O 0.7237(7) 0.4956(3) 0.4851(2) 0.0449(12) Uani 1 1 d . . . . .
 O9 O 0.6773(6) 0.1941(3) 0.3760(2) 0.0402(11) Uani 1 1 d . . . . .
 N3 N 0.6990(7) 0.4960(3) 0.4219(2) 0.0263(10) Uani 1 1 d . . . . .
 N4 N 0.5751(7) 0.7974(3) 0.3962(2) 0.0271(10) Uani 1 1 d . . . . .
 N5 N 0.6063(6) 0.3278(3) 0.1258(2) 0.0284(11) Uani 1 1 d . . . . .
 N1 N 0.1822(7) 0.0587(3) 0.4185(2) 0.0292(11) Uani 1 1 d . . . . .
 N7 N 1.0064(7) 0.8584(3) 0.1327(2) 0.0282(11) Uani 1 1 d . . . . .
 N2 N 0.1997(8) 0.3678(3) 0.3615(3) 0.0365(12) Uani 1 1 d . . . . .
 C14 C 0.6333(7) 0.6460(3) 0.4097(3) 0.0176(10) Uani 1 1 d . . . . .
 H14 H 0.650765 0.643815 0.459758 0.021 Uiso 1 1 calc R . . . .
 C9 C 0.5036(8) 0.6627(3) 0.1253(3) 0.0234(11) Uani 1 1 d . . . . .
 N8 N 0.9809(7) 0.9641(3) 0.2081(3) 0.0351(12) Uani 1 1 d . . . . .
 C15 C 0.5913(7) 0.7201(3) 0.3648(3) 0.0199(11) Uani 1 1 d . . . . .
 C13 C 0.6483(7) 0.5749(3) 0.3766(3) 0.0193(11) Uani 1 1 d . . . . .
 C11 C 0.5729(7) 0.6521(3) 0.2617(3) 0.0197(11) Uani 1 1 d . . . . .
 C16 C 0.5626(7) 0.7252(3) 0.2917(3) 0.0201(11) Uani 1 1 d . . . . .
 H16 H 0.536447 0.777833 0.262767 0.024 Uiso 1 1 calc R . . . .
 C1 C 0.0870(8) 0.1962(3) 0.1083(3) 0.0230(11) Uani 1 1 d . . . . .
 N6 N 0.6341(8) 0.4136(3) 0.2149(3) 0.0385(12) Uani 1 1 d . . . . .
 C29 C 1.0381(8) 0.8207(3) 0.2605(3) 0.0241(12) Uani 1 1 d . . . . .
 C4 C 0.1523(7) 0.1345(3) 0.2937(3) 0.0220(11) Uani 1 1 d . . . . .
 H4 H 0.144710 0.081228 0.279265 0.026 Uiso 1 1 calc R . . . .
 C10 C 0.5348(7) 0.6560(3) 0.1878(3) 0.0216(11) Uani 1 1 d . . . . .
 C3 C 0.1400(7) 0.2099(3) 0.2424(3) 0.0209(11) Uani 1 1 d . . . . .
 C30 C 1.0339(8) 0.7997(3) 0.1913(3) 0.0272(12) Uani 1 1 d . . . . .
 H30 H 1.050887 0.742666 0.185443 0.033 Uiso 1 1 calc R . . . .
 C27 C 1.0852(8) 0.7652(4) 0.3958(3) 0.0322(13) Uani 1 1 d . . . . .
 H27 H 1.076048 0.815332 0.416175 0.039 Uiso 1 1 calc R . . . .
 C2 C 0.1125(8) 0.2052(3) 0.1686(3) 0.0237(12) Uani 1 1 d . . . . .
 C5 C 0.1755(8) 0.1392(3) 0.3651(3) 0.0242(12) Uani 1 1 d . . . . .
 O3 O 0.1654(11) 0.4320(3) 0.3209(3) 0.087(2) Uani 1 1 d . . . . .
 C21 C 0.6551(8) 0.2628(4) 0.2479(3) 0.0261(12) Uani 1 1 d . . . . .
 O4 O 0.2503(10) 0.3688(3) 0.4195(3) 0.079(2) Uani 1 1 d . . . . .
 C12 C 0.6176(7) 0.5755(3) 0.3044(3) 0.0211(11) Uani 1 1 d . . . . .
 H12 H 0.626606 0.525069 0.284382 0.025 Uiso 1 1 calc R . . . .
 O5 O 0.7200(11) 0.4339(3) 0.3943(3) 0.093(2) Uani 1 1 d . . . . .
 C7 C 0.1795(8) 0.2866(3) 0.3381(3) 0.0269(12) Uani 1 1 d . . . . .
 C8 C 0.1533(8) 0.2870(3) 0.2655(3) 0.0252(12) Uani 1 1 d . . . . .
 H8 H 0.144574 0.338708 0.232136 0.030 Uiso 1 1 calc R . . . .
 C26 C 1.1180(8) 0.6829(4) 0.4338(3) 0.0339(14) Uani 1 1 d . . . . .
 H26 H 1.134462 0.667278 0.484392 0.041 Uiso 1 1 calc R . . . .
 C22 C 0.6297(8) 0.2583(4) 0.1757(3) 0.0264(12) Uani 1 1 d . . . . .
 H22 H 0.628980 0.204717 0.161490 0.032 Uiso 1 1 calc R . . . .
 C6 C 0.1896(8) 0.2135(3) 0.3893(3) 0.0259(12) Uani 1 1 d . . . . .
 H6 H 0.205479 0.214830 0.439054 0.031 Uiso 1 1 calc R . . . .
 C20 C 0.6703(8) 0.1872(4) 0.3037(3) 0.0336(14) Uani 1 1 d . . . . .
 C28 C 1.0694(8) 0.7593(4) 0.3253(3) 0.0284(13) Uani 1 1 d . . . . .
 C32 C 1.0081(8) 0.9042(4) 0.2655(3) 0.0288(13) Uani 1 1 d . . . . .
 H32 H 1.006691 0.920072 0.312541 0.035 Uiso 1 1 calc R . . . .
 C19 C 0.6720(8) 0.1091(4) 0.2958(3) 0.0360(15) Uani 1 1 d . . . . .
 H19 H 0.667816 0.088717 0.251109 0.043 Uiso 1 1 calc R . . . .
 C25 C 1.1211(8) 0.6322(4) 0.3851(3) 0.0355(15) Uani 1 1 d . . . . .
 H25 H 1.141613 0.573118 0.395405 0.043 Uiso 1 1 calc R . . . .
 C17 C 0.6831(8) 0.1117(3) 0.4147(3) 0.0327(14) Uani 1 1 d . . . . .
 H17 H 0.687484 0.095842 0.466386 0.039 Uiso 1 1 calc R . . . .
 C31 C 0.9820(8) 0.9372(3) 0.1443(3) 0.0309(13) Uani 1 1 d . . . . .
 H31 H 0.963319 0.978635 0.102616 0.037 Uiso 1 1 calc R . . . .
 C23 C 0.6081(9) 0.4016(4) 0.1486(3) 0.0337(14) Uani 1 1 d . . . . .
 H23 H 0.588694 0.450540 0.113438 0.040 Uiso 1 1 calc R . . . .
 C24 C 0.6584(9) 0.3433(4) 0.2640(3) 0.0385(15) Uani 1 1 d . . . . .
 H24 H 0.678944 0.349128 0.312223 0.046 Uiso 1 1 calc R . . . .
 C18 C 0.6815(9) 0.0591(4) 0.3680(4) 0.052(2) Uani 1 1 d . . . . .
 H18 H 0.685888 -0.000701 0.379914 0.063 Uiso 1 1 calc R . . . .

loop_
  _atom_site_aniso_label
  _atom_site_aniso_U_11
  _atom_site_aniso_U_22
  _atom_site_aniso_U_33
  _atom_site_aniso_U_23
  _atom_site_aniso_U_13
  _atom_site_aniso_U_12
 I2 0.0263(2) 0.0306(2) 0.01161(16) -0.00288(13) -0.00574(13) -0.00115(14)
 I1 0.0265(2) 0.0292(2) 0.01340(17) 0.00022(13) -0.00648(14) 0.00062(14)
 O10 0.027(2) 0.038(2) 0.026(2) 0.0052(17) -0.0049(17) -0.0022(17)
 O7 0.069(3) 0.019(2) 0.029(2) -0.0039(17) -0.009(2) 0.002(2)
 O8 0.058(3) 0.043(2) 0.026(2) -0.0184(18) -0.014(2) 0.010(2)
 O1 0.047(3) 0.030(2) 0.031(2) 0.0006(18) -0.0153(19) 0.0044(19)
 O2 0.058(3) 0.046(3) 0.018(2) 0.0029(18) -0.0162(19) -0.007(2)
 O6 0.079(3) 0.042(2) 0.017(2) -0.0024(18) -0.022(2) 0.013(2)
 O9 0.049(3) 0.043(3) 0.027(2) -0.0038(19) -0.006(2) 0.007(2)
 N3 0.031(3) 0.030(3) 0.019(2) -0.0021(19) -0.0089(19) 0.001(2)
 N4 0.029(3) 0.032(3) 0.023(2) -0.012(2) -0.003(2) 0.002(2)
 N5 0.020(3) 0.049(3) 0.019(2) -0.011(2) -0.0045(19) 0.002(2)
 N1 0.030(3) 0.034(3) 0.022(2) 0.006(2) -0.011(2) -0.003(2)
 N7 0.030(3) 0.035(3) 0.019(2) -0.0027(19) -0.006(2) 0.000(2)
 N2 0.053(4) 0.037(3) 0.017(2) -0.006(2) 0.002(2) -0.003(2)
 C14 0.014(3) 0.028(3) 0.011(2) -0.0043(19) -0.0029(19) -0.002(2)
 C9 0.027(3) 0.028(3) 0.016(3) -0.004(2) -0.005(2) -0.001(2)
 N8 0.041(3) 0.028(3) 0.035(3) -0.006(2) -0.002(2) 0.003(2)
 C15 0.021(3) 0.021(3) 0.019(2) -0.009(2) -0.002(2) -0.002(2)
 C13 0.022(3) 0.025(3) 0.012(2) -0.003(2) -0.006(2) 0.000(2)
 C11 0.022(3) 0.026(3) 0.011(2) -0.0025(19) -0.005(2) 0.000(2)
 C16 0.018(3) 0.024(3) 0.016(2) 0.001(2) -0.001(2) -0.002(2)
 C1 0.027(3) 0.024(3) 0.016(3) 0.000(2) -0.004(2) 0.004(2)
 N6 0.042(3) 0.044(3) 0.036(3) -0.019(2) -0.011(2) 0.000(2)
 C29 0.019(3) 0.033(3) 0.020(3) -0.002(2) -0.003(2) 0.000(2)
 C4 0.022(3) 0.028(3) 0.017(2) -0.006(2) -0.005(2) 0.004(2)
 C10 0.021(3) 0.027(3) 0.015(2) -0.002(2) -0.001(2) 0.001(2)
 C3 0.017(3) 0.030(3) 0.014(2) -0.001(2) -0.001(2) -0.001(2)
 C30 0.028(3) 0.027(3) 0.026(3) -0.003(2) -0.004(2) -0.001(2)
 C27 0.021(3) 0.046(4) 0.025(3) 0.004(3) -0.004(2) 0.003(3)
 C2 0.020(3) 0.031(3) 0.018(3) 0.001(2) -0.002(2) 0.003(2)
 C5 0.025(3) 0.027(3) 0.019(3) 0.001(2) -0.006(2) 0.002(2)
 O3 0.184(7) 0.034(3) 0.056(3) -0.012(3) -0.053(4) 0.007(3)
 C21 0.017(3) 0.044(3) 0.019(3) -0.010(2) -0.004(2) 0.000(2)
 O4 0.169(6) 0.048(3) 0.038(3) -0.017(2) -0.055(4) -0.001(3)
 C12 0.020(3) 0.027(3) 0.017(2) -0.006(2) -0.003(2) 0.002(2)
 O5 0.226(8) 0.032(3) 0.050(3) -0.025(2) -0.085(4) 0.050(4)
 C7 0.029(3) 0.033(3) 0.019(3) -0.008(2) 0.000(2) 0.002(2)
 C8 0.025(3) 0.031(3) 0.016(3) -0.002(2) 0.002(2) 0.004(2)
 C26 0.028(3) 0.046(4) 0.024(3) 0.006(3) -0.007(2) -0.001(3)
 C22 0.021(3) 0.043(3) 0.019(3) -0.014(2) -0.004(2) 0.002(2)
 C6 0.024(3) 0.037(3) 0.016(3) -0.001(2) -0.006(2) -0.005(2)
 C20 0.022(3) 0.065(4) 0.013(3) -0.002(3) -0.005(2) -0.004(3)
 C28 0.019(3) 0.038(3) 0.027(3) 0.000(2) -0.006(2) 0.000(2)
 C32 0.026(3) 0.040(3) 0.022(3) -0.014(2) -0.001(2) -0.002(2)
 C19 0.025(3) 0.060(4) 0.033(3) -0.038(3) 0.004(3) -0.013(3)
 C25 0.021(3) 0.043(4) 0.034(3) 0.018(3) -0.006(3) 0.000(3)
 C17 0.036(4) 0.031(3) 0.024(3) 0.007(2) 0.001(3) 0.004(3)
 C31 0.029(3) 0.032(3) 0.027(3) 0.008(2) -0.006(2) 0.004(2)
 C23 0.034(4) 0.040(3) 0.030(3) -0.011(3) -0.009(3) 0.001(3)
 C24 0.043(4) 0.053(4) 0.025(3) -0.018(3) -0.011(3) 0.003(3)
 C18 0.034(4) 0.035(4) 0.084(6) -0.022(4) 0.013(4) -0.012(3)

_geom_special_details
;
 All esds (except the esd in the dihedral angle between two l.s. planes)
 are estimated using the full covariance matrix.  The cell esds are taken
 into account individually in the estimation of esds in distances, angles
 and torsion angles; correlations between esds in cell parameters are only
 used when they are defined by crystal symmetry.  An approximate (isotropic)
 treatment of cell esds is used for estimating esds involving l.s. planes.
;
loop_
  _geom_bond_atom_site_label_1
  _geom_bond_atom_site_label_2
  _geom_bond_distance
  _geom_bond_site_symmetry_2
  _geom_bond_publ_flag
 I2 C9 2.023(5) . ?
 I1 C1 2.026(5) . ?
 O10 C28 1.363(7) . ?
 O10 C25 1.382(6) . ?
 O7 N4 1.218(6) . ?
 O8 N4 1.235(5) . ?
 O1 N1 1.215(6) . ?
 O2 N1 1.234(6) . ?
 O6 N3 1.211(5) . ?
 O9 C20 1.372(6) . ?
 O9 C17 1.392(6) . ?
 N3 C13 1.462(6) . ?
 N3 O5 1.202(6) . ?
 N4 C15 1.465(6) . ?
 N5 C22 1.341(7) . ?
 N5 C23 1.336(7) . ?
 N1 C5 1.486(6) . ?
 N7 C30 1.341(7) . ?
 N7 C31 1.330(7) . ?
 N2 O3 1.209(6) . ?
 N2 O4 1.189(6) . ?
 N2 C7 1.470(7) . ?
 C14 H14 0.9500 . ?
 C14 C15 1.382(7) . ?
 C14 C13 1.391(7) . ?
 C9 C10 1.199(7) . ?
 N8 C32 1.336(7) . ?
 N8 C31 1.330(7) . ?
 C15 C16 1.389(7) . ?
 C13 C12 1.390(6) . ?
 C11 C16 1.390(7) . ?
 C11 C10 1.427(6) . ?
 C11 C12 1.400(7) . ?
 C16 H16 0.9500 . ?
 C1 C2 1.195(7) . ?
 N6 C23 1.322(7) . ?
 N6 C24 1.343(8) . ?
 C29 C30 1.390(7) . ?
 C29 C28 1.453(7) . ?
 C29 C32 1.376(8) . ?
 C4 H4 0.9500 . ?
 C4 C3 1.410(7) . ?
 C4 C5 1.374(7) . ?
 C3 C2 1.427(7) . ?
 C3 C8 1.397(7) . ?
 C30 H30 0.9500 . ?
 C27 H27 0.9500 . ?
 C27 C26 1.419(8) . ?
 C27 C28 1.349(8) . ?
 C5 C6 1.366(7) . ?
 C21 C22 1.393(7) . ?
 C21 C20 1.459(8) . ?
 C21 C24 1.387(8) . ?
 C12 H12 0.9500 . ?
 C7 C8 1.386(7) . ?
 C7 C6 1.379(7) . ?
 C8 H8 0.9500 . ?
 C26 H26 0.9500 . ?
 C26 C25 1.322(9) . ?
 C22 H22 0.9500 . ?
 C6 H6 0.9500 . ?
 C20 C19 1.294(8) . ?
 C32 H32 0.9500 . ?
 C19 H19 0.9500 . ?
 C19 C18 1.440(9) . ?
 C25 H25 0.9500 . ?
 C17 H17 0.9500 . ?
 C17 C18 1.318(9) . ?
 C31 H31 0.9500 . ?
 C23 H23 0.9500 . ?
 C24 H24 0.9500 . ?
 C18 H18 0.9500 . ?

loop_
  _geom_angle_atom_site_label_1
  _geom_angle_atom_site_label_2
  _geom_angle_atom_site_label_3
  _geom_angle
  _geom_angle_site_symmetry_1
  _geom_angle_site_symmetry_3
  _geom_angle_publ_flag
 C28 O10 C25 106.5(5) . . ?
 C20 O9 C17 105.6(5) . . ?
 O6 N3 C13 119.3(4) . . ?
 O5 N3 O6 121.9(5) . . ?
 O5 N3 C13 118.7(4) . . ?
 O7 N4 O8 123.9(4) . . ?
 O7 N4 C15 118.5(4) . . ?
 O8 N4 C15 117.6(4) . . ?
 C23 N5 C22 116.8(5) . . ?
 O1 N1 O2 125.1(5) . . ?
 O1 N1 C5 118.4(4) . . ?
 O2 N1 C5 116.5(5) . . ?
 C31 N7 C30 116.7(5) . . ?
 O3 N2 C7 118.9(5) . . ?
 O4 N2 O3 121.8(5) . . ?
 O4 N2 C7 119.4(5) . . ?
 C15 C14 H14 122.2 . . ?
 C15 C14 C13 115.6(4) . . ?
 C13 C14 H14 122.2 . . ?
 C10 C9 I2 178.0(5) . . ?
 C31 N8 C32 114.9(5) . . ?
 C14 C15 N4 118.2(4) . . ?
 C14 C15 C16 123.6(4) . . ?
 C16 C15 N4 118.2(4) . . ?
 C14 C13 N3 116.9(4) . . ?
 C12 C13 N3 119.5(4) . . ?
 C12 C13 C14 123.6(4) . . ?
 C16 C11 C10 119.3(4) . . ?
 C16 C11 C12 119.8(4) . . ?
 C12 C11 C10 120.9(4) . . ?
 C15 C16 C11 119.0(4) . . ?
 C15 C16 H16 120.5 . . ?
 C11 C16 H16 120.5 . . ?
 C2 C1 I1 177.6(5) . . ?
 C23 N6 C24 115.5(5) . . ?
 C30 C29 C28 123.1(5) . . ?
 C32 C29 C30 116.3(5) . . ?
 C32 C29 C28 120.6(5) . . ?
 C3 C4 H4 120.5 . . ?
 C5 C4 H4 120.5 . . ?
 C5 C4 C3 118.9(5) . . ?
 C9 C10 C11 177.5(5) . . ?
 C4 C3 C2 119.1(5) . . ?
 C8 C3 C4 118.9(5) . . ?
 C8 C3 C2 122.0(5) . . ?
 N7 C30 C29 121.3(5) . . ?
 N7 C30 H30 119.3 . . ?
 C29 C30 H30 119.3 . . ?
 C26 C27 H27 126.3 . . ?
 C28 C27 H27 126.3 . . ?
 C28 C27 C26 107.4(6) . . ?
 C1 C2 C3 176.1(6) . . ?
 C4 C5 N1 117.7(5) . . ?
 C6 C5 N1 118.7(5) . . ?
 C6 C5 C4 123.6(5) . . ?
 C22 C21 C20 122.0(5) . . ?
 C24 C21 C22 115.6(5) . . ?
 C24 C21 C20 122.3(5) . . ?
 C13 C12 C11 118.4(5) . . ?
 C13 C12 H12 120.8 . . ?
 C11 C12 H12 120.8 . . ?
 C8 C7 N2 118.6(5) . . ?
 C6 C7 N2 118.2(5) . . ?
 C6 C7 C8 123.2(5) . . ?
 C3 C8 H8 120.6 . . ?
 C7 C8 C3 118.8(5) . . ?
 C7 C8 H8 120.6 . . ?
 C27 C26 H26 126.7 . . ?
 C25 C26 C27 106.6(5) . . ?
 C25 C26 H26 126.7 . . ?
 N5 C22 C21 121.8(5) . . ?
 N5 C22 H22 119.1 . . ?
 C21 C22 H22 119.1 . . ?
 C5 C6 C7 116.7(5) . . ?
 C5 C6 H6 121.7 . . ?
 C7 C6 H6 121.7 . . ?
 O9 C20 C21 120.1(5) . . ?
 C19 C20 O9 111.4(5) . . ?
 C19 C20 C21 128.5(5) . . ?
 O10 C28 C29 117.5(5) . . ?
 C27 C28 O10 109.1(5) . . ?
 C27 C28 C29 133.4(6) . . ?
 N8 C32 C29 123.7(5) . . ?
 N8 C32 H32 118.1 . . ?
 C29 C32 H32 118.1 . . ?
 C20 C19 H19 126.7 . . ?
 C20 C19 C18 106.5(5) . . ?
 C18 C19 H19 126.7 . . ?
 O10 C25 H25 124.8 . . ?
 C26 C25 O10 110.4(5) . . ?
 C26 C25 H25 124.8 . . ?
 O9 C17 H17 125.5 . . ?
 C18 C17 O9 109.0(6) . . ?
 C18 C17 H17 125.5 . . ?
 N7 C31 H31 116.5 . . ?
 N8 C31 N7 127.0(5) . . ?
 N8 C31 H31 116.5 . . ?
 N5 C23 H23 116.6 . . ?
 N6 C23 N5 126.8(6) . . ?
 N6 C23 H23 116.6 . . ?
 N6 C24 C21 123.5(5) . . ?
 N6 C24 H24 118.2 . . ?
 C21 C24 H24 118.2 . . ?
 C19 C18 H18 126.3 . . ?
 C17 C18 C19 107.4(6) . . ?
 C17 C18 H18 126.3 . . ?

_shelx_res_file
;
TITL dwat21_0m_a.res in P-1
    dwat21_0m_a_sq.res
    created by SHELXL-2016/6 at 09:20:54 on 07-Mar-2017
REM Old TITL dwat21_0m in P-1
REM SHELXT solution in P-1
REM R1 0.127, Rweak 0.005, Alpha 0.069, Orientation as input
REM Formula found by SHELXT: C49 N6 O7 I2
CELL 0.71073 6.9398 16.1259 18.5167 79.34 80.01 89.242
ZERR 4 0.001 0.0021 0.0027 0.004 0.004 0.004
LATT 1
SFAC C H I N O
UNIT 64 36 4 16 20

L.S. 5 0 85
PLAN  20
SIZE 0.12 0.2 0.3
TEMP -173.15
BOND $H
ABIN
fmap 2
ACTA
OMIT 0 0 1
OMIT 0 1 0
REM <olex2.extras>
REM <HklSrc "%.\\dwat21_0m_a.hkl">
REM </olex2.extras>

WGHT    0.058700    2.785500
FVAR       0.18077
I2    3    0.455433    0.670099    0.019656    11.00000    0.02630    0.03057 =
         0.01161   -0.00288   -0.00574   -0.00115
I1    3    0.041285    0.175756    0.007847    11.00000    0.02653    0.02918 =
         0.01340    0.00022   -0.00648    0.00062
O10   5    1.090447    0.677281    0.317090    11.00000    0.02731    0.03797 =
         0.02590    0.00523   -0.00486   -0.00217
O7    5    0.564611    0.864595    0.354355    11.00000    0.06856    0.01936 =
         0.02921   -0.00387   -0.00881    0.00221
O8    5    0.572760    0.790405    0.463871    11.00000    0.05815    0.04278 =
         0.02594   -0.01836   -0.01443    0.01021
O1    5    0.196785   -0.006730    0.394452    11.00000    0.04736    0.03008 =
         0.03052    0.00058   -0.01525    0.00443
O2    5    0.174400    0.064090    0.484586    11.00000    0.05820    0.04630 =
         0.01806    0.00286   -0.01615   -0.00718
O6    5    0.723717    0.495645    0.485099    11.00000    0.07883    0.04206 =
         0.01725   -0.00243   -0.02236    0.01287
O9    5    0.677252    0.194062    0.375954    11.00000    0.04874    0.04324 =
         0.02715   -0.00379   -0.00563    0.00660
N3    4    0.698986    0.496033    0.421872    11.00000    0.03056    0.03021 =
         0.01880   -0.00206   -0.00891    0.00120
N4    4    0.575060    0.797449    0.396173    11.00000    0.02904    0.03163 =
         0.02287   -0.01222   -0.00314    0.00173
N5    4    0.606313    0.327755    0.125789    11.00000    0.02037    0.04856 =
         0.01857   -0.01104   -0.00453    0.00190
N1    4    0.182193    0.058664    0.418537    11.00000    0.02960    0.03416 =
         0.02181    0.00597   -0.01066   -0.00328
N7    4    1.006359    0.858437    0.132681    11.00000    0.03018    0.03463 =
         0.01942   -0.00271   -0.00592   -0.00037
N2    4    0.199653    0.367806    0.361527    11.00000    0.05282    0.03705 =
         0.01705   -0.00591    0.00220   -0.00337
C14   1    0.633303    0.646025    0.409679    11.00000    0.01448    0.02772 =
         0.01106   -0.00426   -0.00293   -0.00183
AFIX  43
H14   2    0.650765    0.643815    0.459758    11.00000   -1.20000
AFIX   0
C9    1    0.503563    0.662692    0.125296    11.00000    0.02654    0.02826 =
         0.01594   -0.00428   -0.00483   -0.00065

N8    4    0.980915    0.964067    0.208097    11.00000    0.04084    0.02762 =
         0.03527   -0.00595   -0.00224    0.00265
C15   1    0.591291    0.720095    0.364836    11.00000    0.02115    0.02088 =
         0.01911   -0.00859   -0.00167   -0.00217
C13   1    0.648339    0.574886    0.376626    11.00000    0.02164    0.02530 =
         0.01187   -0.00326   -0.00575   -0.00034
C11   1    0.572880    0.652077    0.261668    11.00000    0.02245    0.02578 =
         0.01127   -0.00254   -0.00486   -0.00044
C16   1    0.562633    0.725203    0.291742    11.00000    0.01761    0.02353 =
         0.01645    0.00140   -0.00071   -0.00159
AFIX  43
H16   2    0.536447    0.777833    0.262767    11.00000   -1.20000
AFIX   0

C1    1    0.086990    0.196235    0.108316    11.00000    0.02747    0.02401 =
         0.01592    0.00025   -0.00375    0.00425
N6    4    0.634150    0.413610    0.214949    11.00000    0.04180    0.04403 =
         0.03565   -0.01914   -0.01064   -0.00013
C29   1    1.038109    0.820736    0.260533    11.00000    0.01891    0.03271 =
         0.01952   -0.00194   -0.00315   -0.00044
C4    1    0.152344    0.134450    0.293741    11.00000    0.02216    0.02772 =
         0.01711   -0.00598   -0.00465    0.00369
AFIX  43
H4    2    0.144710    0.081228    0.279265    11.00000   -1.20000
AFIX   0

C10   1    0.534776    0.656043    0.187805    11.00000    0.02131    0.02691 =
         0.01505   -0.00222   -0.00065    0.00069
C3    1    0.140042    0.209873    0.242365    11.00000    0.01660    0.02966 =
         0.01427   -0.00065   -0.00057   -0.00104
C30   1    1.033908    0.799736    0.191327    11.00000    0.02806    0.02697 =
         0.02566   -0.00345   -0.00393   -0.00142
AFIX  43
H30   2    1.050887    0.742666    0.185443    11.00000   -1.20000
AFIX   0
C27   1    1.085192    0.765239    0.395773    11.00000    0.02131    0.04594 =
         0.02515    0.00384   -0.00352    0.00307
AFIX  43
H27   2    1.076048    0.815332    0.416175    11.00000   -1.20000
AFIX   0

C2    1    0.112548    0.205186    0.168627    11.00000    0.02009    0.03078 =
         0.01754    0.00079   -0.00200    0.00294
C5    1    0.175546    0.139197    0.365053    11.00000    0.02481    0.02736 =
         0.01882    0.00117   -0.00565    0.00233
O3    5    0.165430    0.431999    0.320875    11.00000    0.18378    0.03382 =
         0.05568   -0.01232   -0.05264    0.00704
C21   1    0.655082    0.262751    0.247950    11.00000    0.01706    0.04391 =
         0.01920   -0.01014   -0.00352   -0.00044
O4    5    0.250328    0.368813    0.419479    11.00000    0.16857    0.04765 =
         0.03843   -0.01657   -0.05455   -0.00125
C12   1    0.617558    0.575450    0.304353    11.00000    0.02037    0.02653 =
         0.01703   -0.00576   -0.00315    0.00164
AFIX  43
H12   2    0.626606    0.525069    0.284382    11.00000   -1.20000
AFIX   0
O5    5    0.720029    0.433882    0.394300    11.00000    0.22578    0.03223 =
         0.04961   -0.02520   -0.08517    0.05026

C7    1    0.179483    0.286586    0.338085    11.00000    0.02913    0.03263 =
         0.01884   -0.00831   -0.00016    0.00177
C8    1    0.153320    0.286982    0.265520    11.00000    0.02496    0.03104 =
         0.01631   -0.00170    0.00221    0.00433
AFIX  43
H8    2    0.144574    0.338708    0.232136    11.00000   -1.20000
AFIX   0

C26   1    1.117990    0.682911    0.433822    11.00000    0.02811    0.04553 =
         0.02389    0.00620   -0.00661   -0.00072
AFIX  43
H26   2    1.134462    0.667278    0.484392    11.00000   -1.20000
AFIX   0

C22   1    0.629718    0.258345    0.175738    11.00000    0.02085    0.04300 =
         0.01851   -0.01356   -0.00421    0.00229
AFIX  43
H22   2    0.628980    0.204717    0.161490    11.00000   -1.20000
AFIX   0

C6    1    0.189571    0.213540    0.389338    11.00000    0.02428    0.03725 =
         0.01572   -0.00141   -0.00573   -0.00481
AFIX  43
H6    2    0.205479    0.214830    0.439054    11.00000   -1.20000
AFIX   0

C20   1    0.670309    0.187202    0.303689    11.00000    0.02151    0.06527 =
         0.01265   -0.00150   -0.00524   -0.00386
C28   1    1.069371    0.759341    0.325302    11.00000    0.01874    0.03797 =
         0.02687    0.00043   -0.00635    0.00022
C32   1    1.008124    0.904166    0.265549    11.00000    0.02605    0.04021 =
         0.02216   -0.01367   -0.00104   -0.00177
AFIX  43
H32   2    1.006691    0.920072    0.312541    11.00000   -1.20000
AFIX   0

C19   1    0.672016    0.109084    0.295794    11.00000    0.02452    0.05956 =
         0.03268   -0.03824    0.00388   -0.01258
AFIX  43
H19   2    0.667816    0.088717    0.251109    11.00000   -1.20000
AFIX   0

C25   1    1.121145    0.632188    0.385109    11.00000    0.02060    0.04276 =
         0.03371    0.01798   -0.00576   -0.00040
AFIX  43
H25   2    1.141613    0.573118    0.395405    11.00000   -1.20000
AFIX   0

C17   1    0.683088    0.111664    0.414672    11.00000    0.03590    0.03076 =
         0.02405    0.00725    0.00123    0.00432
AFIX  43
H17   2    0.687484    0.095842    0.466386    11.00000   -1.20000
AFIX   0

C31   1    0.981983    0.937156    0.144347    11.00000    0.02884    0.03229 =
         0.02680    0.00790   -0.00596    0.00434
AFIX  43
H31   2    0.963319    0.978635    0.102616    11.00000   -1.20000
AFIX   0

C23   1    0.608128    0.401586    0.148584    11.00000    0.03385    0.04011 =
         0.03026   -0.01125   -0.00912    0.00055
AFIX  43
H23   2    0.588694    0.450540    0.113438    11.00000   -1.20000
AFIX   0
C24   1    0.658409    0.343321    0.263981    11.00000    0.04299    0.05329 =
         0.02498   -0.01774   -0.01097    0.00260
AFIX  43
H24   2    0.678944    0.349128    0.312223    11.00000   -1.20000
AFIX   0
C18   1    0.681533    0.059106    0.368044    11.00000    0.03425    0.03523 =
         0.08393   -0.02176    0.01259   -0.01204
AFIX  43
H18   2    0.685888   -0.000701    0.379914    11.00000   -1.20000
AFIX   0
HKLF 4


REM  dwat21_0m_a.res in P-1
REM R1 =  0.0484 for    6152 Fo > 4sig(Fo)  and  0.0672 for all    8062 data
REM    469 parameters refined using      0 restraints

END

WGHT      0.0586      2.7937

REM Highest difference peak  2.026,  deepest hole -1.860,  1-sigma level  0.148
Q1    1   0.5811  0.6768  0.0091  11.00000  0.05    2.03
Q2    1  -0.0765  0.1640  0.0186  11.00000  0.05    1.95
Q3    1   0.3184  0.6695  0.0346  11.00000  0.05    1.94
Q4    1   0.1801  0.1796 -0.0027  11.00000  0.05    1.66
Q5    1   0.4480  0.7241  0.0340  11.00000  0.05    1.43
Q6    1   0.0682  0.1201 -0.0009  11.00000  0.05    1.33
Q7    1   0.0590  0.2360  0.0091  11.00000  0.05    1.15
Q8    1   0.4428  0.6105  0.0158  11.00000  0.05    0.95
Q9    1   0.6147  0.4375  0.4021  11.00000  0.05    0.65
Q10   1  -0.2181  0.1932  0.0464  11.00000  0.05    0.65
Q11   1   0.7176  0.6941 -0.0105  11.00000  0.05    0.62
Q12   1  -0.2148  0.1690  0.0403  11.00000  0.05    0.60
Q13   1   0.7280  0.6745  0.0158  11.00000  0.05    0.57
Q14   1   0.3152  0.1771  0.0126  11.00000  0.05    0.57
Q15   1   0.6715  0.0815  0.2906  11.00000  0.05    0.55
Q16   1   0.5933  0.1359  0.3057  11.00000  0.05    0.55
Q17   1   0.7191  0.6237  0.0173  11.00000  0.05    0.53
Q18   1   0.4818  0.5568 -0.0021  11.00000  0.05    0.53
Q19   1   0.2031  0.6774  0.0097  11.00000  0.05    0.51
Q20   1   0.6683  0.3036  0.2535  11.00000  0.05    0.50
;
_shelx_res_checksum               25368
_shelx_hkl_file
;
  -1   0   0   -0.30    0.60
  -1   0   0   -0.80    0.40
  -1   0   0   -1.20    0.60
   1   0   0   -1.70    0.60
   1   0   0   -2.20    0.50
   1   0   0   -1.60    0.50
  -2   0   0 1525.35   87.49
  -2   0   0 1603.14   87.49
   2   0   0 1636.54   87.49
   2   0   0 1616.34   87.29
   2   0   0 1618.34   87.49
  -3   0   0    0.60    1.20
  -3   0   0    1.20    1.30
   3   0   0   -1.10    1.10
   3   0   0    0.50    0.80
   3   0   0   -0.60    0.90
  -4   0   0   34.90    3.80
  -4   0   0   33.80    3.70
   4   0   0   25.60    2.50
   4   0   0   29.10    3.30
  -5   0   0    3.40    2.10
  -5   0   0    2.20    1.90
   5   0   0    0.80    1.60
   5   0   0    0.40    0.90
   6   0   0   28.00    4.30
  -7   0   0   -0.90    2.80
  -8   0   0   44.00    6.40
  -8   1   0   64.59    7.90
  -7   1   0    8.00    3.20
   6  -1   0  270.17   17.30
  -6   1   0  289.57   17.90
  -6   1   0  291.17   17.80
   5  -1   0    8.30    2.30
  -5   1   0   13.30    2.70
  -5   1   0   13.70    2.80
   4  -1   0   83.79    5.70
   4  -1   0   99.59    6.50
  -4   1   0   91.79    6.60
  -4   1   0  100.29    6.70
   3  -1   0    1.90    1.00
   3  -1   0    1.40    0.90
   3  -1   0    3.20    1.20
  -3   1   0    1.60    1.30
  -3   1   0    3.20    1.30
  -3   1   0    1.00    0.90
   2  -1   0  899.71   50.69
   2  -1   0  963.10   50.79
   2  -1   0  962.60   50.79
  -2   1   0  896.01   50.79
  -2   1   0  903.71   50.89
  -2   1   0  934.31   50.89
   1  -1   0  233.08   13.50
   1  -1   0  247.58   13.40
  -1   1   0  253.57   13.50
  -1   1   0  254.37   13.50
  -1   1   0  227.68   13.50
   0  -1   0   -0.60    0.10
  -1  -1   0   51.49    3.50
  -1  -1   0   53.49    3.50
   1   1   0   53.49    3.40
   1   1   0   53.59    3.40
  -2  -1   0  137.99    8.80
  -2  -1   0  146.49    8.80
   2   1   0  142.69    8.70
   2   1   0  153.28    8.70
  -3  -1   0   -0.80    1.30
  -3  -1   0    1.80    1.30
   3   1   0    0.90    1.10
   3   1   0    0.10    0.80
   3   1   0    0.10    1.20
  -4  -1   0   62.19    4.80
  -4  -1   0   51.09    4.70
   4   1   0   63.39    4.80
   4   1   0   47.70    4.00
  -5  -1   0    3.20    2.00
  -5  -1   0   -1.00    1.80
   5   1   0    0.00    1.50
   5   1   0   -1.90    0.90
  -6  -1   0   41.20    5.40
   6   1   0   33.10    4.60
  -7  -1   0    0.30    3.00
   7   1   0   10.90    3.30
  -8  -1   0  108.49   10.40
  -8   2   0   24.50    5.10
  -7   2   0   26.60    4.70
   6  -2   0    8.80    2.40
  -6   2   0   13.40    3.20
   5  -2   0  101.29    7.40
  -5   2   0  106.19    7.60
  -5   2   0  107.79    7.70
   4  -2   0    3.90    1.40
  -4   2   0    0.20    1.30
  -4   2   0    1.60    1.10
  -4   2   0    2.50    1.40
   3  -2   0  331.87   18.30
   3  -2   0  296.37   18.10
   3  -2   0  337.17   18.30
  -3   2   0  322.97   18.40
  -3   2   0  331.17   18.40
  -3   2   0  319.47   18.40
   2  -2   0   84.89    5.60
   2  -2   0   95.99    5.60
   2  -2   0   98.09    5.60
  -2   2   0   88.59    5.60
  -2   2   0   95.09    5.60
  -2   2   0   92.39    5.70
   1  -2   0   39.80    2.20
   1  -2   0   33.20    2.20
  -1   2   0   40.10    2.30
  -1   2   0   35.30    2.60
  -1   2   0   37.90    2.20
   0  -2   0  346.27   19.10
   0   2   0  348.67   19.10
  -1  -2   0   33.80    2.70
  -1  -2   0   35.90    2.70
   1   2   0   39.70    2.80
   1   2   0   36.30    2.70
  -2  -2   0  548.25   29.90
  -2  -2   0  507.05   29.90
   2   2   0  551.74   29.90
   2   2   0  530.45   29.90
  -3  -2   0  389.56   22.00
  -3  -2   0  354.96   22.00
   3   2   0  404.06   22.00
   3   2   0  378.46   21.90
  -4  -2   0   95.29    7.00
  -4  -2   0   94.49    6.90
   4   2   0   92.39    6.80
   4   2   0   92.79    6.10
  -5  -2   0  156.88   11.40
   5   2   0  173.98   11.20
   5   2   0  172.28   10.20
  -6  -2   0   35.70    5.00
   6   2   0   33.20    5.00
  -7  -2   0   51.89    6.90
   7   2   0   50.89    6.10
  -8  -2   0   35.20    6.30
  -8   3   0   -0.10    2.90
  -7   3   0    5.30    2.60
   6  -3   0    1.50    1.80
  -6   3   0    1.80    2.20
   5  -3   0   14.50    2.40
  -5   3   0   19.60    3.00
   4  -3   0    0.60    1.00
   4  -3   0    0.00    1.00
  -4   3   0    2.00    1.20
  -4   3   0    0.40    1.10
  -4   3   0    2.40    1.40
   3  -3   0  639.94   34.20
   3  -3   0  627.74   34.20
  -3   3   0  633.94   34.60
  -3   3   0  575.14   34.30
  -3   3   0  613.54   34.30
   2  -3   0   92.19    5.30
  -2   3   0   89.79    5.40
  -2   3   0   88.59    5.30
  -2   3   0   87.49    5.70
  -1   3   0 1405.06   76.49
   0  -3   0    0.50    0.60
   0  -3   0   -1.10    0.60
   0   3   0   -0.80    0.40
   0   3   0   -0.40    0.60
   0   3   0   -1.00    0.60
  -1  -3   0 2196.18  117.59
  -1  -3   0 2136.79  117.59
   1   3   0 2149.88  117.59
   1   3   0 2131.29  117.49
  -2  -3   0   30.90    3.00
  -2  -3   0   25.80    2.90
   2   3   0   22.60    2.50
   2   3   0   24.20    2.70
  -3  -3   0  641.94   39.50
  -3  -3   0  688.03   39.50
   3   3   0  756.02   39.60
   3   3   0  731.03   39.60
  -4  -3   0    4.50    2.00
  -4  -3   0    2.10    1.90
   4   3   0    3.50    1.80
   5   3   0    5.10    1.40
   5   3   0    3.50    2.10
  -6  -3   0    7.50    3.00
   6   3   0    9.10    2.90
  -7  -3   0    5.20    3.30
   7   3   0    3.10    2.80
  -8  -3   0    3.50    3.80
  -8   4   0    2.40    3.20
  -7   4   0   70.69    7.40
  -6   4   0    1.50    1.30
  -6   4   0    4.90    2.30
   5  -4   0  220.88   14.20
  -5   4   0  246.28   14.70
  -5   4   0  265.77   14.70
  -5   4   0  234.98   14.70
   4  -4   0   11.90    1.70
   4  -4   0   13.10    1.80
  -4   4   0   11.40    2.20
  -4   4   0   13.60    2.00
  -4   4   0   11.70    2.00
   3  -4   0  482.85   27.20
  -3   4   0  497.45   27.80
  -3   4   0  490.85   27.30
  -3   4   0  495.15   27.40
   2  -4   0  122.39    7.00
  -2   4   0  124.49    7.20
  -2   4   0  123.99    7.20
  -2   4   0  134.49    7.80
  -1   4   0   10.50    1.00
  -1   4   0   11.80    1.10
   0  -4   0  147.49    8.80
   0  -4   0  148.79    8.70
   0   4   0  142.19    8.60
   0   4   0  158.48    8.80
   0   4   0  164.58    8.80
  -1  -4   0  314.67   16.80
  -1  -4   0  276.77   16.60
  -1  -4   0  263.37   16.20
   1   4   0  300.97   16.70
   1   4   0  312.87   16.70
  -2  -4   0   36.70    3.40
  -2  -4   0   40.60    4.00
   2   4   0   37.60    3.30
   2   4   0   41.40    3.50
  -3  -4   0  392.46   23.60
  -3  -4   0  402.86   23.70
   3   4   0  421.96   23.70
   3   4   0  418.16   23.60
  -4  -4   0    1.50    1.90
   4   4   0    1.70    1.60
  -5  -4   0  135.39    9.80
   5   4   0  133.39    9.40
   5   4   0  130.39    8.40
  -6  -4   0    7.30    3.30
   6   4   0   17.40    3.60
  -7  -4   0   41.70    6.40
   7   4   0   40.80    5.70
  -8  -4   0    0.10    3.50
  -8   5   0   20.20    4.90
  -7   5   0   23.60    4.10
  -6   5   0  100.49    8.10
  -6   5   0  121.09    8.00
  -5   5   0   15.10    2.50
  -5   5   0   18.20    2.90
  -5   5   0   15.40    2.60
   4  -5   0  160.78    8.80
   4  -5   0  121.79    8.60
  -4   5   0  150.98    9.10
  -4   5   0  164.78    9.80
  -4   5   0  153.18    9.10
   3  -5   0  233.78   13.20
  -3   5   0  235.68   13.40
  -3   5   0  237.48   13.40
  -3   5   0  239.88   14.20
  -2   5   0    0.20    0.50
  -2   5   0    0.10    0.50
  -2   5   0   -0.30    1.10
  -1   5   0  406.26   22.50
  -1   5   0  411.06   22.50
   0  -5   0   44.80    3.10
   0  -5   0   43.30    3.00
   0   5   0   44.90    3.10
   0   5   0   45.60    3.10
   0   5   0   39.90    2.80
  -1  -5   0  380.66   20.70
  -1  -5   0  342.27   20.00
  -1  -5   0  344.17   20.50
   1   5   0  386.16   20.70
   1   5   0  370.76   20.60
  -2  -5   0   32.60    3.60
  -2  -5   0   32.60    3.50
   2   5   0   36.30    3.40
   2   5   0   32.80    3.30
  -3  -5   0   52.09    4.60
  -3  -5   0   50.89    4.60
   3   5   0   52.39    4.50
   3   5   0   49.90    4.40
  -4  -5   0  127.09    9.20
   4   5   0  129.29    8.90
  -5  -5   0   20.60    3.90
   5   5   0   19.10    3.70
  -6  -5   0   70.09    7.80
   6   5   0   79.09    7.20
  -7  -5   0   28.60    5.50
   7   5   0   20.60    4.50
  -8  -5   0   19.80    5.30
  -8   6   0   28.40    5.00
  -7   6   0   13.20    3.30
  -6   6   0    1.30    1.70
  -6   6   0    3.70    2.00
  -5   6   0   14.20    2.40
  -5   6   0   18.50    3.10
  -5   6   0   13.10    2.20
   4  -6   0  115.29    7.00
  -4   6   0  123.89    7.50
  -4   6   0  127.19    8.30
  -4   6   0  118.99    7.40
  -3   6   0    0.10    1.10
  -3   6   0    0.20    0.70
  -3   6   0    0.70    0.70
  -2   6   0  358.36   21.80
  -2   6   0  383.46   20.90
  -2   6   0  389.86   20.80
   1  -6   0   21.10    1.50
   1  -6   0   20.10    1.40
  -1   6   0   19.10    1.60
   0  -6   0  680.43   37.80
   0  -6   0  654.33   37.90
   0   6   0  733.83   37.90
   0   6   0  652.73   37.70
   0   6   0  710.43   37.90
  -1  -6   0   17.70    2.20
  -1  -6   0   19.50    2.40
  -1  -6   0   13.30    1.20
   1   6   0   23.00    2.50
   1   6   0   19.90    2.30
  -2  -6   0  318.67   18.90
  -2  -6   0  316.97   19.50
  -2  -6   0  347.27   19.80
   2   6   0  332.07   19.60
   2   6   0  381.46   19.80
  -3  -6   0   19.90    3.20
   3   6   0   21.40    3.60
   3   6   0   20.30    3.10
  -4  -6   0   74.69    6.60
   4   6   0   79.69    6.30
  -5  -6   0   44.60    5.70
   5   6   0   35.90    4.80
  -6  -6   0   16.50    4.00
   6   6   0    9.00    3.30
  -7  -6   0   -0.90    3.20
   7   6   0   -3.70    2.10
  -8  -6   0   29.80    6.70
   8   6   0   34.30    8.30
  -8   7   0   52.39    6.50
  -7   7   0    0.90    2.10
  -6   7   0  126.79    8.70
   5  -7   0   16.60    1.70
  -5   7   0   16.80    2.40
  -5   7   0   14.90    3.20
  -5   7   0   20.10    2.60
  -4   7   0  119.29    7.10
  -4   7   0  110.49    7.10
  -4   7   0  117.09    8.20
  -3   7   0   40.40    2.70
  -3   7   0   37.30    2.70
  -3   7   0   45.50    4.00
  -2   7   0   42.80    2.70
  -2   7   0   42.40    3.90
  -2   7   0   45.00    2.80
   1  -7   0   44.80    2.80
   1  -7   0   45.50    3.00
  -1   7   0   47.60    3.10
   0  -7   0  140.19    8.60
   0  -7   0  140.99    8.50
   0   7   0  156.88    8.70
   0   7   0  133.19    8.30
   0   7   0  144.09    8.60
  -1  -7   0   42.70    3.80
  -1  -7   0   43.40    3.70
   1   7   0   42.00    3.70
   1   7   0   46.20    3.60
  -2  -7   0  196.58   12.20
  -2  -7   0  195.08   12.60
  -2  -7   0  188.38   11.30
   2   7   0  214.08   12.30
   2   7   0  189.88   12.00
  -3  -7   0    5.80    2.10
   3   7   0    6.70    2.10
  -4  -7   0  290.87   18.00
   4   7   0  283.17   17.70
  -5  -7   0   23.40    4.50
   5   7   0   20.60    3.80
  -6  -7   0  130.89   10.40
   6   7   0  110.19    9.30
  -7  -7   0   -2.60    3.20
   7   7   0    1.10    2.90
  -7   8   0   56.89    5.60
  -6   8   0    0.30    2.30
  -6   8   0    0.80    1.60
  -5   8   0   97.99    6.40
  -5   8   0   91.09    6.30
  -5   8   0   95.09    7.60
  -4   8   0   10.20    1.40
  -4   8   0    7.30    2.50
  -4   8   0    7.80    1.30
  -3   8   0   62.09    4.00
  -3   8   0   60.49    5.30
  -3   8   0   72.49    4.00
  -2   8   0  256.67   15.20
  -2   8   0  280.47   15.30
  -2   8   0  301.17   16.80
   1  -8   0    0.80    0.80
   1  -8   0    1.00    0.60
  -1   8   0    1.30    0.80
   0  -8   0  484.65   30.00
   0  -8   0  547.55   30.00
   0   8   0  521.65   29.80
   0   8   0  572.04   30.10
   0   8   0  566.14   30.10
  -1  -8   0   81.49    6.10
  -1  -8   0   95.79    6.30
   1   8   0   86.69    6.20
   1   8   0   98.29    6.30
  -2  -8   0  305.57   17.60
  -2  -8   0  327.87   18.80
   2   8   0  298.67   18.50
   2   8   0  327.97   18.70
  -3  -8   0  110.29    7.80
  -3  -8   0   99.69    6.60
   3   8   0   94.29    7.40
  -4  -8   0   27.00    4.20
   4   8   0   26.80    4.20
  -5  -8   0  104.69    8.90
   5   8   0   96.19    8.00
  -6  -8   0    1.40    3.10
   6   8   0   -1.30    2.40
  -7  -8   0   35.10    6.30
   7   8   0   51.39    7.10
  -7   9   0    2.90    1.90
  -6   9   0   41.60    4.10
  -6   9   0   49.30    5.80
  -5   9   0   49.70    5.70
  -5   9   0   46.00    3.60
  -4   9   0   68.59    4.40
  -4   9   0   71.99    4.50
  -4   9   0   81.19    6.50
  -3   9   0  245.68   15.80
  -3   9   0  260.07   14.10
  -2   9   0   20.90    1.90
  -2   9   0   20.30    1.60
  -2   9   0   21.30    1.90
   1  -9   0  388.16   21.30
   1  -9   0  372.96   21.10
  -1   9   0  382.36   21.40
   0  -9   0   21.00    2.30
   0  -9   0   16.70    2.20
   0   9   0   17.70    2.30
   0   9   0   18.80    1.90
   0   9   0   18.70    2.40
  -1  -9   0  399.66   23.00
   1   9   0  412.86   22.90
   1   9   0  378.16   22.90
  -2  -9   0   73.89    4.50
  -2  -9   0   79.19    6.10
   2   9   0   75.49    5.90
   2   9   0   78.29    6.00
  -3  -9   0  104.29    7.80
  -3  -9   0  101.79    6.50
   3   9   0   91.79    7.50
  -4  -9   0   10.00    3.30
  -4  -9   0    6.90    1.80
   4   9   0    8.70    2.70
  -5  -9   0   11.20    3.50
   5   9   0   12.90    3.50
  -6  -9   0    8.50    3.80
   6   9   0   -0.30    2.30
  -7  -9   0    7.00    3.90
   7   9   0    2.10    3.10
  -6  10   0   -5.20    2.00
  -6  10   0    0.80    1.20
  -5  10   0  131.49    9.80
  -5  10   0  126.39    7.60
  -4  10   0    0.20    1.90
  -3  10   0   43.20    5.20
  -2  10   0   22.60    1.90
  -2  10   0   23.60    2.20
  -2  10   0   27.60    3.80
   1 -10   0    7.40    1.20
   1 -10   0    9.30    1.40
  -1  10   0    6.90    1.40
  -1  10   0   10.50    1.80
   0 -10   0    1.50    1.20
   0 -10   0    2.90    1.30
   0  10   0   -0.40    0.90
   0  10   0    1.60    1.20
   0  10   0    3.40    1.40
  -1 -10   0  119.89    8.20
   1  10   0  113.49    8.10
   1  10   0  130.39    8.20
  -2 -10   0    2.40    1.90
   2  10   0    3.90    1.90
   2  10   0    6.30    2.20
  -3 -10   0  229.38   14.50
  -3 -10   0  225.18   12.90
   3  10   0  204.38   14.10
  -4 -10   0    2.10    2.70
   4  10   0    8.70    2.70
  -5 -10   0  130.09   10.40
   5  10   0  126.39   10.00
  -6 -10   0   -2.70    2.80
   6  10   0   -3.40    2.40
  -7 -10   0   69.49    9.10
   7  10   0   64.69    8.40
  -6  11   0   21.00    4.30
  -5  11   0    9.60    3.30
  -4  11   0   47.30    5.90
  -3  11   0  115.19    8.90
  -2  11   0    9.70    2.90
  -2  11   0   17.10    1.70
  -2  11   0   15.80    1.80
   1 -11   0  180.48    9.90
   1 -11   0  162.28   10.10
  -1  11   0  167.08   10.30
  -1  11   0  185.48   10.70
  -1  11   0  162.28   10.20
   0 -11   0   -0.90    1.10
   0  11   0    1.60    1.40
   0  11   0    0.10    1.10
   0  11   0   -1.90    0.80
  -1 -11   0  127.09    8.20
   1  11   0  110.09    8.00
   1  11   0  113.09    8.10
  -2 -11   0   12.60    2.70
   2  11   0   15.00    3.00
   2  11   0   15.80    3.00
  -3 -11   0   18.80    1.90
  -3 -11   0   16.70    3.50
   3  11   0   21.70    3.80
  -4 -11   0   65.89    7.30
   4  11   0   69.79    6.50
  -5 -11   0   -0.20    2.80
   5  11   0    0.80    2.50
  -6 -11   0   38.10    6.40
   6  11   0   38.90    6.10
  -6  12   0   10.00    3.60
  -5  12   0   28.10    4.80
  -4  12   0   81.99    7.70
  -3  12   0  147.69   10.90
  -2  12   0  172.88   10.30
  -2  12   0  172.58   10.20
  -2  12   0  186.88   12.40
   1 -12   0    2.60    1.20
   1 -12   0    5.10    1.20
  -1  12   0    3.40    1.40
  -1  12   0    4.00    1.70
  -1  12   0    4.80    1.50
   0 -12   0  215.28   12.60
   0  12   0  209.38   12.70
   0  12   0  197.48   11.70
  -1 -12   0   22.40    3.40
   1  12   0   29.80    3.80
   1  12   0   30.90    4.00
  -2 -12   0  137.59    9.60
   2  12   0  126.79    9.40
   2  12   0  131.69    9.50
  -3 -12   0   23.40    4.30
   3  12   0   25.10    4.20
  -4 -12   0   21.10    4.50
   4  12   0   17.50    3.90
  -5 -12   0   63.79    7.90
   5  12   0   39.50    5.90
  -6 -12   0    5.90    4.00
   6  12   0   -0.50    2.60
  -6  13   0   40.40    6.40
  -5  13   0   -0.20    2.50
  -4  13   0  140.89   10.80
  -3  13   0   84.89    7.90
  -2  13   0    0.30    2.80
  -2  13   0    4.50    1.20
  -2  13   0    9.20    2.30
  -2  13   0    3.40    1.40
   1 -13   0   23.20    2.60
  -1  13   0   19.30    2.80
  -1  13   0   21.80    3.10
  -1  13   0   22.20    2.80
   0 -13   0  122.29    8.10
   0  13   0  117.09    8.10
  -1 -13   0  143.39   10.00
   1  13   0  162.18   10.20
   1  13   0  132.69    9.80
  -2 -13   0   86.09    7.00
   2  13   0   70.89    6.70
  -3 -13   0   -1.00    2.20
   3  13   0   -0.20    2.20
  -4 -13   0  179.98   12.70
   4  13   0  159.38   12.10
  -5 -13   0   -2.10    2.90
   5  13   0    4.50    3.10
  -6 -13   0   47.20    7.10
   6  13   0   53.99    7.30
  -6  14   0   -1.80    3.60
  -5  14   0   12.20    4.00
  -4  14   0    6.30    3.10
  -3  14   0    7.00    3.30
  -3  14   0    9.60    2.90
  -2  14   0  202.18   14.00
  -2  14   0  186.88   11.60
  -2  14   0  200.48   12.70
  -1  14   0    2.60    1.80
  -1  14   0    2.40    1.50
  -1 -14   0   31.50    4.10
   1  14   0   24.20    3.90
  -2 -14   0   49.40    5.80
   2  14   0   56.69    6.30
  -3 -14   0   29.10    4.80
   3  14   0   23.00    4.20
  -4 -14   0   40.50    6.20
   4  14   0   25.20    4.80
  -5 -14   0    0.40    3.10
   5  14   0   -3.80    2.60
  -5  15   0    5.10    3.60
  -4  15   0   42.70    5.90
  -4  15   0   37.20    5.90
  -3  15   0   42.40    6.40
  -3  15   0   52.69    6.10
  -2  15   0    0.10    1.40
  -2  15   0    2.30    3.10
  -2  15   0   -0.90    2.00
  -1  15   0   89.59    6.60
   2  15   0   55.59    6.30
  -3 -15   0   90.19    8.30
   3  15   0   82.29    8.00
  -4 -15   0   15.50    4.20
   4  15   0   18.00    4.30
  -5 -15   0    1.80    3.80
   5  15   0    5.30    3.50
  -5  16   0   57.59    8.20
  -5  16   0   43.80    6.80
  -4  16   0   -1.80    2.90
  -4  16   0   -0.60    2.30
  -3  16   0   14.10    4.50
  -3  16   0   11.70    3.80
  -2  16   0   -1.40    2.80
  -2  16   0   -2.00    1.40
  -1  16   0   10.10    2.40
   0  16   0   12.90    3.10
   2  16   0    9.50    3.30
   3  16   0   85.89    9.10
   4  16   0    1.40    3.00
  -4  17   0    6.40    4.00
  -3  17   0   42.90    6.80
  -2  17   0    0.30    3.10
  -2  17   0    0.10    1.50
  -1  17   0   63.99    5.40
  -1  17   0   57.59    7.90
   0  17   0    2.30    2.30
   3  17   0   14.10    4.10
   4  17   0   10.10    4.30
  -3  18   0    0.60    3.60
  -2  18   0   29.10    6.50
  -1  18   0    1.90    2.10
  -1  18   0    5.90    4.00
   0  18   0   52.29    6.00
   1  18   0   17.70    4.20
  -2  19   0    2.60    3.60
  -1  19   0   -1.40    3.50
  -1  19   0    4.30    2.50
   0  19   0   -0.30    2.40
   0  19   0    4.90    4.00
   1  19   0    1.20    2.80
   1  19  -1    1.80    3.10
   1  19  -1    1.10    3.60
   0  19  -1   22.30    5.60
   0  19  -1   21.90    4.20
  -1  19  -1   -2.70    2.20
  -1  19  -1   -7.60    3.40
  -2  19  -1    7.80    4.40
   2  18  -1   39.80    6.40
   1  18  -1   14.50    4.60
   1  18  -1    5.70    3.30
   0  18  -1   43.20    7.00
   0  18  -1   42.70    5.60
  -1  18  -1    2.10    3.50
  -1  18  -1   -0.70    2.10
  -2  18  -1   72.49    9.10
  -3  18  -1    5.70    4.00
   1  17  -1   30.20    5.00
   0  17  -1   -0.20    3.20
   0  17  -1    6.90    2.60
  -1  17  -1   49.70    5.50
  -1  17  -1   54.39    7.60
  -2  17  -1   -1.00    3.00
  -2  17  -1   -1.10    1.70
  -3  17  -1   52.39    7.90
  -4  17  -1   -0.10    2.90
   0  16  -1    4.50    2.40
  -1  16  -1    2.30    1.90
  -1  16  -1   -2.50    2.80
  -2  16  -1   11.20    3.90
  -2  16  -1    7.70    2.20
  -3  16  -1   29.20    5.50
  -4  16  -1   -0.80    2.80
  -4  16  -1    2.60    3.60
  -5  16  -1   65.39    8.60
   5  15  -1   11.60    4.20
  -5 -15   1    0.60    3.80
   4  15  -1   24.00    4.70
  -4 -15   1   19.50    4.80
   3  15  -1   15.80    4.20
  -3 -15   1   18.50    4.60
   0  15  -1    4.10    2.20
  -1  15  -1   68.89    5.50
  -1  15  -1   60.19    7.80
  -2  15  -1   19.00    4.90
  -2  15  -1   29.00    3.80
  -2  15  -1   28.60    3.30
  -3  15  -1   86.99    9.20
  -3  15  -1   76.79    7.00
  -4  15  -1   25.80    5.50
  -5  15  -1   22.30    4.80
   5  14  -1   59.09    7.60
  -5 -14   1   58.69    7.60
   4  14  -1    5.20    3.00
  -4 -14   1    2.90    3.50
   3  14  -1   89.99    8.10
  -3 -14   1   90.09    8.20
   2  14  -1    1.80    2.40
  -2 -14   1    3.60    2.60
  -1 -14   1    2.20    2.00
   0  14  -1  259.77   16.00
  -1  14  -1   -1.20    2.50
  -1  14  -1    1.70    1.50
  -1  14  -1    0.80    1.60
  -2  14  -1   59.89    7.20
  -2  14  -1   68.69    5.70
  -2  14  -1   62.39    4.90
  -3  14  -1   50.19    6.70
  -3  14  -1   47.80    3.30
  -4  14  -1   13.20    4.30
  -5  14  -1   28.30    5.20
  -6  14  -1    1.90    3.50
   6  13  -1   87.09    9.40
  -6 -13   1   72.29    9.10
   5  13  -1   -0.40    2.70
  -5 -13   1    2.10    3.30
   4  13  -1   88.59    8.50
  -4 -13   1  105.49    9.20
   3  13  -1   73.49    7.80
  -3 -13   1   82.89    8.40
   2  13  -1  217.98   14.60
  -2 -13   1  227.78   14.80
   1  13  -1   41.40    4.60
  -1 -13   1   30.20    4.20
   0  13  -1   35.40    4.00
   0 -13   1   41.80    4.40
  -1  13  -1   67.69    5.20
  -1  13  -1   60.09    5.00
  -1  13  -1   70.99    5.20
   1 -13   1   70.69    5.30
  -2  13  -1   54.19    4.10
  -2  13  -1   60.99    4.60
  -2  13  -1   64.39    7.20
  -3  13  -1   18.60    1.80
  -3  13  -1   24.70    4.60
  -3  13  -1   20.30    1.80
  -4  13  -1   20.00    4.80
  -5  13  -1    6.70    3.30
  -6  13  -1   50.59    7.00
   6  12  -1    2.00    3.10
  -6 -12   1   12.60    4.40
   5  12  -1    4.40    2.80
  -5 -12   1    1.10    3.20
   4  12  -1   23.10    4.50
  -4 -12   1   22.00    4.40
   3  12  -1   11.60    3.10
  -3 -12   1   10.50    3.20
   2  12  -1   58.89    5.80
  -2 -12   1   61.09    5.90
   1  12  -1   61.69    5.50
   1  12  -1   60.09    5.20
  -1 -12   1   54.99    5.30
   0  12  -1  260.87   15.70
   0 -12   1  262.57   15.80
  -1  12  -1   25.90    3.00
  -1  12  -1   25.50    3.00
  -1  12  -1   22.10    2.70
   1 -12   1   25.90    2.90
  -2  12  -1  211.68   14.10
  -2  12  -1  207.48   12.10
  -2  12  -1  205.88   12.30
  -3  12  -1   13.40    1.40
  -3  12  -1    7.70    3.10
  -3  12  -1   13.80    1.50
  -4  12  -1   47.10    6.20
  -5  12  -1    1.30    2.80
  -6  12  -1    6.70    3.60
   6  11  -1   58.39    7.60
  -6 -11   1   56.79    7.90
   5  11  -1   -1.20    2.30
  -5 -11   1    1.50    3.10
   4  11  -1   43.70    5.70
  -4 -11   1   41.70    6.00
   3  11  -1   10.50    3.00
  -3 -11   1   14.60    3.70
   2  11  -1   43.90    5.00
   2  11  -1   47.90    5.10
  -2 -11   1   46.70    5.20
   1  11  -1  130.29    8.90
   1  11  -1  126.59    8.60
  -1 -11   1  127.59    8.90
   0  11  -1   20.70    2.80
   0 -11   1   22.80    3.00
  -1  11  -1  228.08   13.90
  -1  11  -1  231.98   13.90
  -1  11  -1  242.48   14.00
   1 -11   1  248.78   13.60
   1 -11   1  234.58   13.90
  -2  11  -1   14.00    3.10
  -2  11  -1    9.40    1.80
  -2  11  -1   10.60    1.50
  -3  11  -1   29.60    2.30
  -3  11  -1   28.70    2.20
  -3  11  -1   43.10    5.20
  -4  11  -1   68.59    7.60
  -5  11  -1   13.90    3.90
  -5  11  -1   15.30    1.50
  -6  11  -1   49.10    6.50
   7  10  -1   74.99    8.90
  -7 -10   1   64.49    9.00
   6  10  -1   -5.00    2.20
  -6 -10   1   -1.10    2.90
   5  10  -1  162.68   12.20
  -5 -10   1  171.18   12.70
   4  10  -1   11.80    3.20
  -4 -10   1    8.00    3.30
   3  10  -1  195.28   12.90
  -3 -10   1  195.38   11.30
  -3 -10   1  195.78   13.20
   2  10  -1   23.90    3.50
   2  10  -1   29.40    3.90
  -2 -10   1   36.20    4.40
   1  10  -1   97.69    7.40
   1  10  -1  115.79    7.50
  -1 -10   1  105.29    7.50
   0  10  -1   65.19    4.90
   0  10  -1   64.39    4.00
   0 -10   1   68.49    5.00
  -1  10  -1    9.80    1.60
  -1  10  -1    8.70    1.70
   1 -10   1    9.40    1.50
   1 -10   1   11.00    1.60
  -2  10  -1    3.80    1.30
  -2  10  -1    2.90    1.90
  -2  10  -1    1.90    0.80
  -3  10  -1  124.29    7.50
  -3  10  -1  134.99    7.60
  -3  10  -1  138.09    9.50
  -4  10  -1    2.90    0.90
  -4  10  -1    3.60    2.50
  -4  10  -1    3.80    0.90
  -5  10  -1   86.89    5.70
  -5  10  -1   89.49    7.90
  -6  10  -1   -0.70    2.50
  -6  10  -1    0.30    1.20
   7   9  -1   18.40    4.60
  -7  -9   1   16.10    4.90
   6   9  -1    9.60    3.70
  -6  -9   1    9.80    4.10
   5   9  -1    1.10    2.40
  -5  -9   1   -0.20    2.50
   4   9  -1   43.10    5.40
  -4  -9   1   55.39    6.10
   3   9  -1   82.69    6.90
  -3  -9   1   91.99    7.20
  -3  -9   1   83.39    5.60
   2   9  -1   14.60    2.60
   2   9  -1   13.70    2.60
  -2  -9   1   13.90    2.70
   1   9  -1  268.67   15.50
   1   9  -1  250.27   15.50
  -1  -9   1  256.07   15.60
   0   9  -1    5.40    1.00
   0   9  -1    7.80    1.60
   0  -9   1    9.40    1.80
   0  -9   1    5.90    1.60
  -1   9  -1  435.66   24.30
  -1   9  -1  438.56   24.40
   1  -9   1  405.86   24.30
   1  -9   1  453.55   24.10
  -2   9  -1   63.39    4.30
  -2   9  -1   63.29    4.10
  -2   9  -1   72.49    5.80
  -3   9  -1  251.77   15.30
  -3   9  -1  250.57   13.60
  -3   9  -1  226.98   13.60
  -4   9  -1   30.20    2.80
  -4   9  -1   41.80    4.90
  -4   9  -1   35.40    2.80
  -5   9  -1   26.00    4.50
  -5   9  -1   30.90    3.00
  -6   9  -1    5.50    3.00
  -6   9  -1    6.80    1.90
  -7   9  -1    0.50    1.80
   7   8  -1   56.29    7.40
  -7  -8   1   47.10    7.10
   6   8  -1    5.80    3.10
  -6  -8   1    6.90    3.40
   5   8  -1  118.09    9.40
  -5  -8   1  122.99    9.80
   4   8  -1   17.20    3.40
  -4  -8   1   15.70    3.40
   3   8  -1  201.68   12.90
  -3  -8   1  199.88   13.10
   2   8  -1   90.69    6.60
   2   8  -1   97.29    6.70
  -2  -8   1   88.69    5.40
  -2  -8   1   96.39    7.00
   1   8  -1   49.80    3.80
   1   8  -1   38.80    3.70
  -1  -8   1   35.70    3.90
  -1  -8   1   34.60    3.50
   0   8  -1  340.07   19.30
   0   8  -1  356.26   19.20
   0   8  -1  316.87   18.60
   0  -8   1  321.37   19.20
   0  -8   1  346.27   19.10
  -1   8  -1   12.20    1.60
  -1   8  -1   12.70    1.70
   1  -8   1   13.50    1.70
   1  -8   1   12.70    1.50
  -2   8  -1  161.28    9.50
  -2   8  -1  137.89    8.10
  -2   8  -1  124.69    7.90
  -3   8  -1   51.19    5.30
  -3   8  -1   45.60    3.30
  -3   8  -1   47.60    3.20
  -4   8  -1   90.09    5.70
  -4   8  -1   87.99    5.70
  -4   8  -1   88.99    7.10
  -5   8  -1  141.79    8.80
  -5   8  -1  133.39    8.70
  -5   8  -1  144.89   10.30
  -6   8  -1   -1.30    2.30
  -6   8  -1   -1.10    1.40
  -7   8  -1   39.20    4.70
   7   7  -1    1.00    2.90
  -7  -7   1    0.70    3.60
   6   7  -1  114.69   10.00
  -6  -7   1  142.59   10.70
   5   7  -1    0.50    2.10
  -5  -7   1   -0.90    2.20
   4   7  -1  278.67   17.50
  -4  -7   1  283.37   17.80
   3   7  -1    3.90    1.80
  -3  -7   1    1.10    1.90
   2   7  -1  359.66   19.80
   2   7  -1  341.57   19.70
  -2  -7   1  334.37   19.80
  -2  -7   1  313.97   18.70
   1   7  -1   26.70    3.10
   1   7  -1   30.00    3.20
  -1  -7   1   32.00    3.40
  -1  -7   1   27.80    3.10
   0   7  -1    4.60    1.40
   0   7  -1    4.00    1.20
   0   7  -1    3.90    0.80
   0  -7   1    2.50    1.20
   0  -7   1    4.10    1.30
  -1   7  -1  162.48    9.30
  -1   7  -1  154.48    9.30
   1  -7   1  149.79    9.30
   1  -7   1  168.68    9.10
  -2   7  -1   14.30    1.60
  -2   7  -1   13.20    2.60
  -2   7  -1   15.10    1.60
  -3   7  -1   89.29    5.70
  -3   7  -1   99.79    5.80
  -3   7  -1   92.69    6.80
  -4   7  -1  205.78   11.70
  -4   7  -1  185.98   11.60
  -4   7  -1  205.58   12.80
  -5   7  -1    0.50    1.30
  -5   7  -1   -2.00    1.80
  -5   7  -1    2.20    1.40
   5  -7   1    0.50    1.00
  -6   7  -1  129.19    9.80
  -6   7  -1  129.39    9.00
  -7   7  -1    0.70    2.00
  -8   7  -1   27.50    4.80
   7   6  -1    0.90    2.80
  -7  -6   1    2.20    3.50
   6   6  -1    3.10    2.50
  -6  -6   1    8.60    3.30
   5   6  -1   12.20    3.00
  -5  -6   1    5.20    2.70
   4   6  -1   36.70    4.50
  -4  -6   1   35.20    4.80
   3   6  -1    7.60    2.20
  -3  -6   1    9.10    2.30
   2   6  -1  377.36   20.60
   2   6  -1  355.56   20.50
  -2  -6   1  320.67   20.40
  -2  -6   1  357.36   20.70
   1   6  -1    7.40    1.70
   1   6  -1    7.30    1.60
  -1  -6   1    7.20    1.70
  -1  -6   1    5.30    1.60
   0   6  -1  621.94   33.30
   0   6  -1  618.24   33.30
   0  -6   1  558.04   33.30
   0  -6   1  599.44   33.20
  -1   6  -1   79.99    5.30
  -1   6  -1   85.39    5.30
   1  -6   1   83.09    5.20
   1  -6   1   93.89    5.10
  -2   6  -1  535.05   29.80
  -2   6  -1  515.55   28.80
  -2   6  -1  519.35   28.90
  -3   6  -1    6.40    1.20
  -3   6  -1    5.20    1.20
  -3   6  -1    7.40    2.00
   3  -6   1    6.70    0.80
  -4   6  -1   91.79    5.90
  -4   6  -1   93.09    5.90
  -4   6  -1   94.79    6.80
   4  -6   1   84.79    5.50
   4  -6   1   84.59    5.40
  -5   6  -1   18.10    2.60
  -5   6  -1   19.80    3.40
  -5   6  -1   20.50    2.70
   5  -6   1   15.30    2.00
  -6   6  -1    6.70    2.20
  -6   6  -1    8.80    2.70
  -7   6  -1    6.70    2.80
  -8   6  -1   10.70    3.70
  -8  -5   1   28.90    6.10
   7   5  -1    7.10    3.00
  -7  -5   1    8.40    3.70
   6   5  -1   77.79    7.30
  -6  -5   1   97.29    8.50
   5   5  -1    7.30    2.60
  -5  -5   1   10.20    3.00
   4   5  -1  124.99    8.90
  -4  -5   1  127.09    9.20
   3   5  -1   19.60    3.10
   3   5  -1   16.10    2.60
  -3  -5   1   15.50    2.90
  -3  -5   1   22.40    3.30
   2   5  -1  212.58   12.30
   2   5  -1  201.08   12.20
  -2  -5   1  195.98   12.30
  -2  -5   1  194.18   12.20
   1   5  -1  245.88   14.20
   1   5  -1  251.07   14.20
  -1  -5   1  228.08   14.10
  -1  -5   1  251.37   14.30
   0   5  -1   37.30    2.90
   0   5  -1   37.10    2.80
   0  -5   1   34.20    2.90
   0  -5   1   35.50    2.80
  -1   5  -1  290.77   17.10
  -1   5  -1  296.17   17.10
   1  -5   1  337.27   16.90
   1  -5   1  296.27   17.00
  -2   5  -1  134.89    8.50
  -2   5  -1  132.69    7.80
  -2   5  -1  140.19    7.80
   2  -5   1  123.19    7.50
   2  -5   1  140.59    7.50
  -3   5  -1   87.09    5.50
  -3   5  -1   88.29    5.50
  -3   5  -1   97.79    6.40
   3  -5   1   80.39    5.30
   3  -5   1   90.69    5.30
  -4   5  -1  123.19    8.00
  -4   5  -1  129.69    7.90
  -4   5  -1  149.29    8.90
   4  -5   1  116.49    7.60
  -5   5  -1    0.80    1.50
  -5   5  -1   -0.40    1.70
  -5   5  -1    0.90    1.40
   5  -5   1    2.60    1.20
  -6   5  -1   93.39    6.90
  -6   5  -1   74.59    6.70
  -7   5  -1    1.20    2.30
  -8   5  -1   20.70    4.70
  -8  -4   1   13.50    4.70
   7   4  -1   54.89    6.90
  -7  -4   1   74.59    8.70
   6   4  -1   16.20    3.50
  -6  -4   1   12.70    4.00
   5   4  -1  219.48   13.80
   5   4  -1  200.98   12.60
  -5  -4   1  229.98   14.40
   4   4  -1   11.20    2.70
  -4  -4   1   18.20    3.20
   3   4  -1  473.35   26.30
   3   4  -1  475.55   26.30
  -3  -4   1  410.56   26.30
  -3  -4   1  468.55   26.40
   2   4  -1   58.69    4.40
   2   4  -1   57.09    4.40
  -2  -4   1   59.39    4.40
  -2  -4   1   51.99    4.40
   1   4  -1  302.67   17.10
   1   4  -1  299.77   17.00
  -1  -4   1  290.17   17.10
  -1  -4   1  300.37   17.00
   0   4  -1  431.76   23.90
   0   4  -1  436.06   23.90
   0  -4   1  425.66   23.90
   0  -4   1  423.46   23.80
  -1   4  -1   95.89    6.50
  -1   4  -1  101.49    6.10
  -1   4  -1  109.79    6.10
   1  -4   1  102.59    5.90
  -2   4  -1  221.08   13.50
  -2   4  -1  239.58   12.90
  -2   4  -1  223.68   12.90
   2  -4   1  217.38   12.90
   2  -4   1  243.68   12.80
  -3   4  -1  157.58   10.20
  -3   4  -1  160.18    9.70
  -3   4  -1  165.38    9.60
   3  -4   1  170.78    9.60
  -4   4  -1   64.19    4.50
  -4   4  -1   55.69    4.80
  -4   4  -1   58.89    4.50
   4  -4   1   54.29    4.20
   4  -4   1   62.19    4.20
  -5   4  -1  150.48   10.20
  -5   4  -1  172.08   10.50
  -5   4  -1  174.78   10.40
   5  -4   1  143.39    9.80
  -6   4  -1    0.60    1.90
  -6   4  -1    1.50    1.60
  -7   4  -1  134.99   10.30
  -8   4  -1    1.90    3.20
  -8  -3   1   25.50    5.60
   7   3  -1   20.50    4.10
  -7  -3   1   20.50    4.40
   6   3  -1    8.30    2.80
  -6  -3   1   16.00    3.90
   5   3  -1   66.59    5.70
   5   3  -1   63.39    4.50
   4   3  -1    2.40    1.60
  -4  -3   1    0.80    1.60
  -4  -3   1    2.90    1.90
   3   3  -1  560.34   31.10
   3   3  -1  583.54   31.20
  -3  -3   1  501.25   31.10
  -3  -3   1  548.85   31.20
   2   3  -1    5.90    1.50
   2   3  -1    7.40    1.60
  -2  -3   1    3.00    1.50
  -2  -3   1    4.50    1.70
   1   3  -1 2628.44  146.39
   1   3  -1 2769.92  146.39
  -1  -3   1 2630.14  146.39
  -1  -3   1 2705.83  146.39
   0   3  -1    2.10    0.90
   0  -3   1    2.80    0.90
   0  -3   1    3.40    1.00
  -1   3  -1 3517.55  168.38
  -1   3  -1 2896.11  168.08
  -1   3  -1 3093.99  168.08
   1  -3   1 2848.81  167.98
  -2   3  -1   47.90    3.10
  -2   3  -1   42.00    3.00
  -2   3  -1   43.50    3.50
   2  -3   1   47.00    3.40
   2  -3   1   45.90    3.00
  -3   3  -1  171.18    9.90
  -3   3  -1  156.98    9.90
  -3   3  -1  172.28   10.30
   3  -3   1  186.28    9.90
   3  -3   1  157.28    9.80
   3  -3   1  162.68   10.00
  -4   3  -1    6.30    1.60
  -4   3  -1    7.10    1.80
  -4   3  -1    6.60    1.60
   4  -3   1    5.80    1.60
   4  -3   1    4.90    1.40
   4  -3   1    6.20    1.40
  -5   3  -1   37.30    4.10
  -5   3  -1   33.10    3.90
  -5   3  -1   41.10    3.80
   5  -3   1   31.00    3.60
  -6   3  -1    3.00    2.40
   6  -3   1    3.40    1.80
  -7   3  -1   20.70    3.90
  -8   3  -1    3.80    3.30
  -8  -2   1    2.00    3.40
   7   2  -1   88.69    8.00
  -7  -2   1   89.79    8.80
   6   2  -1    6.90    2.80
  -6  -2   1    9.40    3.30
   5   2  -1  312.97   19.80
   5   2  -1  350.66   18.60
  -5  -2   1  314.87   20.10
   4   2  -1  266.27   15.80
   4   2  -1  258.57   14.80
  -4  -2   1  247.58   15.80
  -4  -2   1  267.97   15.90
   3   2  -1  421.16   23.30
   3   2  -1  424.96   23.30
  -3  -2   1  413.36   23.30
  -3  -2   1  361.56   23.20
   2   2  -1    1.10    1.20
   2   2  -1    2.30    1.20
  -2  -2   1    2.10    1.30
  -2  -2   1    5.00    1.60
   1   2  -1  298.07   16.70
   1   2  -1  304.47   16.80
  -1  -2   1  284.57   16.80
  -1  -2   1  299.77   16.80
   0   2  -1   38.00    2.40
   0   2  -1   36.50    2.60
   0  -2   1   46.10    2.70
   0  -2   1   43.50    2.70
  -1   2  -1   27.40    2.00
  -1   2  -1   31.90    2.50
   1  -2   1   23.00    2.20
   1  -2   1   31.50    2.10
  -2   2  -1    0.30    0.90
  -2   2  -1    1.00    1.10
  -2   2  -1    1.20    0.90
   2  -2   1    0.90    1.00
   2  -2   1    0.40    0.80
   2  -2   1    0.20    0.80
  -3   2  -1   31.20    3.00
  -3   2  -1   35.20    3.00
  -3   2  -1   30.80    3.10
   3  -2   1   33.80    2.90
   3  -2   1   34.60    2.80
   3  -2   1   36.00    2.90
  -4   2  -1    1.40    1.40
  -4   2  -1    1.10    1.30
  -4   2  -1    0.30    1.20
   4  -2   1   -0.50    1.20
   4  -2   1    0.40    1.00
   4  -2   1    1.10    1.50
  -5   2  -1   55.49    5.30
  -5   2  -1   47.50    4.60
  -5   2  -1   54.39    4.20
   5  -2   1   39.60    4.50
   5  -2   1   49.99    3.80
  -6   2  -1    4.60    2.50
  -6   2  -1    6.90    2.50
   6  -2   1    7.90    2.20
  -7   2  -1   86.39    7.90
  -8   2  -1    7.80    3.90
  -8  -1   1    8.10    4.10
   7   1  -1    9.60    4.20
  -7  -1   1   17.90    4.40
   6   1  -1   10.10    2.90
  -6  -1   1   11.90    3.30
   5   1  -1    9.20    2.40
   5   1  -1    4.90    0.90
  -5  -1   1   12.10    2.80
  -5  -1   1    7.40    2.60
   4   1  -1  990.60   51.49
   4   1  -1  964.30   52.39
  -4  -1   1  942.61   52.49
  -4  -1   1  846.92   52.39
   3   1  -1   99.79    6.50
   3   1  -1  103.79    6.60
   3   1  -1   94.79    5.80
  -3  -1   1   87.79    6.60
  -3  -1   1  103.09    6.70
   2   1  -1 2662.53  144.29
   2   1  -1 2767.02  144.29
  -2  -1   1 2725.03  144.29
  -2  -1   1 2417.86  144.19
   1   1  -1  182.88   10.90
   1   1  -1  195.98   10.90
  -1  -1   1  192.78   10.90
  -1  -1   1  192.48   10.90
   0   1  -1    3.20    0.50
   0   1  -1    2.20    0.40
   0  -1   1    4.50    0.60
   0  -1   1    4.40    0.60
  -1   1  -1    2.60    0.70
  -1   1  -1    1.90    0.70
  -1   1  -1    0.90    0.80
   1  -1   1    2.10    0.60
   1  -1   1    1.90    0.60
   1  -1   1    1.40    0.80
  -2   1  -1   46.60    3.50
  -2   1  -1   45.60    3.40
  -2   1  -1   48.10    3.50
   2  -1   1   47.10    3.40
   2  -1   1   50.69    3.40
   2  -1   1   50.89    3.40
  -3   1  -1   34.60    3.10
  -3   1  -1   33.10    3.00
  -3   1  -1   36.20    2.90
   3  -1   1   30.00    2.80
   3  -1   1   36.50    3.10
   3  -1   1   34.40    2.90
  -4   1  -1  679.43   37.60
  -4   1  -1  682.93   37.20
  -4   1  -1  624.34   37.60
   4  -1   1  716.73   37.50
   4  -1   1  636.94   37.10
  -5   1  -1    4.80    2.00
  -5   1  -1    6.00    2.10
   5  -1   1    4.90    1.40
   5  -1   1    3.30    2.00
  -6   1  -1  166.58   11.40
  -6   1  -1  164.38   11.60
   6  -1   1  162.68   11.00
  -7   1  -1   30.80    5.20
  -8   1  -1   72.49    8.70
  -8   0   1   20.50    4.90
  -7   0   1   -5.30    2.30
   6   0  -1    2.10    2.70
  -6   0   1   23.80    3.70
   5   0  -1    1.50    1.60
  -5   0   1    2.50    1.90
  -5   0   1    4.60    1.90
   4   0  -1  202.48   12.50
  -4   0   1  219.68   12.90
  -4   0   1  193.48   12.60
   3   0  -1    0.90    1.00
   3   0  -1    1.80    1.20
   3   0  -1    0.40    0.60
  -3   0   1    2.30    1.30
  -3   0   1    2.60    1.40
   2   0  -1 9999.00  524.45
   2   0  -1 9791.82  524.45
   2   0  -1 9152.78  523.65
  -2   0   1 9421.86  524.55
  -2   0   1 9826.42  524.05
   1   0  -1    5.70    0.90
   1   0  -1    5.70    1.00
  -1   0   1    8.50    1.10
  -1   0   1    5.90    1.00
   0   0  -1   -0.40    0.20
   0   0  -1   -0.60    0.20
   0   0   1   -0.60    0.20
  -1   0  -1    7.10    1.10
  -1   0  -1    5.90    1.10
  -1   0  -1    3.10    0.90
   1   0   1    4.00    1.10
   1   0   1    6.60    1.00
   1   0   1    6.80    1.00
  -2   0  -1   72.49    4.70
  -2   0  -1   72.59    4.90
  -2   0  -1   71.69    4.90
   2   0   1   74.59    4.80
   2   0   1   76.29    4.90
   2   0   1   76.29    4.90
  -3   0  -1    1.90    1.40
  -3   0  -1    4.10    1.40
   3   0   1    2.30    1.10
   3   0   1    2.70    1.20
   3   0   1    4.50    1.40
  -4   0  -1  449.26   26.60
  -4   0  -1  432.76   26.60
   4   0   1  494.05   26.30
   4   0   1  481.05   26.60
  -5   0  -1   14.20    3.00
  -5   0  -1   11.80    2.80
   5   0   1   12.60    2.50
   5   0   1   12.50    1.80
   6   0   1    4.50    2.60
  -7   0  -1    1.80    2.90
  -8   0  -1   18.50    4.80
  -8   1   1   73.99    8.90
  -7   1   1   10.70    3.40
   6  -1  -1   79.09    6.70
  -6   1   1   86.39    7.30
  -6   1   1   78.49    7.40
   5  -1  -1    0.90    1.70
  -5   1   1    5.00    1.80
  -5   1   1    2.30    1.70
   4  -1  -1 1171.18   62.29
  -4   1   1 1122.09   62.39
  -4   1   1 1079.69   62.39
   3  -1  -1   87.19    5.80
   3  -1  -1   90.69    5.90
  -3   1   1   93.99    6.10
  -3   1   1   89.49    6.10
   2  -1  -1 1667.43   93.39
   2  -1  -1 1773.22   93.39
  -2   1   1 1649.54   93.39
  -2   1   1 1800.32   93.49
  -2   1   1 1660.13   93.09
   1  -1  -1   12.70    1.20
  -1   1   1    9.30    1.10
  -1   1   1   11.80    1.20
   0  -1  -1    0.10    0.20
   0  -1  -1    0.10    0.30
   0   1   1    0.00    0.20
   0   1   1   -0.10    0.20
   0   1   1    0.10    0.20
  -1  -1  -1   46.90    3.20
  -1  -1  -1   46.80    3.20
   1   1   1   47.50    3.20
   1   1   1   51.39    3.20
  -2  -1  -1  103.79    6.50
  -2  -1  -1  104.29    6.50
   2   1   1  101.79    6.40
   2   1   1  101.69    6.30
   2   1   1  102.49    6.40
  -3  -1  -1   39.20    3.70
  -3  -1  -1   36.00    3.60
   3   1   1   40.90    3.20
   3   1   1   43.90    3.40
   3   1   1   41.20    3.60
  -4  -1  -1  135.49    9.10
  -4  -1  -1  140.69    9.30
   4   1   1  151.58    9.20
   4   1   1  133.29    8.80
  -5  -1  -1    2.00    2.00
  -5  -1  -1    6.80    2.50
   5   1   1    2.00    1.30
   5   1   1    0.50    1.80
  -6  -1  -1  267.17   16.70
   6   1   1  243.88   16.10
  -7  -1  -1    5.70    3.40
   7   1   1    0.30    2.10
  -8  -1  -1   23.20    5.30
  -8   2   1   11.80    4.20
  -7   2   1   58.39    6.70
   6  -2  -1    1.40    1.80
  -6   2   1    3.60    2.40
   5  -2  -1  188.48   12.20
  -5   2   1  194.68   12.40
  -5   2   1  202.68   12.50
   4  -2  -1    8.10    1.70
  -4   2   1   11.90    2.20
  -4   2   1    9.90    1.40
  -4   2   1   10.60    2.10
   3  -2  -1  116.89    7.20
   3  -2  -1  117.89    7.20
  -3   2   1  114.89    7.40
  -3   2   1  115.09    7.00
  -3   2   1  120.09    7.40
   2  -2  -1  347.17   19.50
   2  -2  -1  358.76   19.50
  -2   2   1  350.76   19.50
  -2   2   1  345.27   19.50
  -2   2   1  347.07   19.50
   1  -2  -1   85.99    5.10
   1  -2  -1   94.29    5.10
  -1   2   1   86.89    5.10
  -1   2   1   92.59    5.10
   0  -2  -1  163.08    8.80
   0  -2  -1  141.99    8.60
   0   2   1  150.68    8.80
   0   2   1  165.38    8.60
  -1  -2  -1   22.50    2.00
  -1  -2  -1   20.20    2.00
   1   2   1   22.80    1.90
   1   2   1   19.30    1.90
  -2  -2  -1  658.13   37.70
  -2  -2  -1  678.73   37.70
   2   2   1  688.63   37.70
   2   2   1  690.43   37.70
  -3  -2  -1  116.99    8.20
  -3  -2  -1  119.39    8.10
   3   2   1  135.19    8.10
   3   2   1  117.69    7.60
   3   2   1  142.09    8.20
  -4  -2  -1   -1.20    1.30
  -4  -2  -1   -0.40    1.60
   4   2   1   -0.90    1.20
   4   2   1    1.50    1.70
  -5  -2  -1   66.59    6.00
   5   2   1   64.69    4.90
   5   2   1   62.89    5.80
   6   2   1    2.60    2.50
  -7  -2  -1   75.79    8.40
   7   2   1   62.79    7.20
  -8  -2  -1   54.09    7.80
  -8   3   1    0.10    2.80
  -7   3   1   26.40    4.40
  -6   3   1    2.80    2.20
   5  -3  -1   13.00    2.50
  -5   3   1   20.50    3.00
  -5   3   1   19.60    2.10
   4  -3  -1    1.80    1.20
   4  -3  -1    1.00    1.00
  -4   3   1   -1.00    1.00
  -4   3   1    2.30    1.30
  -4   3   1    3.20    1.40
   3  -3  -1  334.57   18.60
   3  -3  -1  338.97   18.50
  -3   3   1  328.97   18.70
  -3   3   1  325.17   18.70
  -3   3   1  318.27   18.70
   2  -3  -1    0.60    0.60
  -2   3   1    1.60    0.80
  -2   3   1    0.40    0.70
  -2   3   1    1.10    0.70
   0  -3  -1    4.10    0.80
   0  -3  -1    5.60    0.90
   0  -3  -1    3.90    0.80
   0   3   1    5.20    0.80
   0   3   1    7.00    0.90
   0   3   1    6.80    1.10
  -1  -3  -1 1837.72  106.09
  -1  -3  -1 1950.80  106.19
  -1  -3  -1 1968.70  106.29
   1   3   1 1991.70  106.19
   1   3   1 1982.60  106.19
  -2  -3  -1  274.17   16.30
  -2  -3  -1  263.97   16.30
   2   3   1  292.17   16.30
   2   3   1  300.37   16.30
  -3  -3  -1   48.30    4.30
  -3  -3  -1   40.80    4.20
   3   3   1   49.30    4.00
   3   3   1   53.79    4.20
  -4  -3  -1   52.29    5.30
  -4  -3  -1   52.99    4.80
   4   3   1   51.59    4.00
   4   3   1   50.69    4.60
  -5  -3  -1   29.30    4.30
   5   3   1   16.70    2.40
   5   3   1   20.80    3.50
  -6  -3  -1   49.00    6.20
   6   3   1   57.39    6.30
  -7  -3  -1   31.90    5.20
   7   3   1   18.50    4.20
  -8  -3  -1   16.80    5.00
  -8   4   1    7.50    3.50
  -7   4   1  100.79    8.60
  -6   4   1    1.90    2.00
  -5   4   1  309.17   18.90
  -5   4   1  308.57   18.80
  -5   4   1  337.87   18.60
   4  -4  -1   26.70    2.60
  -4   4   1   28.80    3.00
  -4   4   1   27.10    3.10
  -4   4   1   29.70    3.10
   3  -4  -1  240.78   12.80
  -3   4   1  222.08   13.00
  -3   4   1  223.08   13.30
  -3   4   1  216.58   13.00
   2  -4  -1   90.09    5.20
   2  -4  -1   88.79    5.10
  -2   4   1   92.09    5.30
  -2   4   1   95.99    5.30
   0  -4  -1    0.50    0.70
   0  -4  -1    0.90    0.70
   0   4   1    1.50    0.90
   0   4   1    0.30    0.70
   0   4   1   -0.10    0.60
  -1  -4  -1  163.98    9.70
  -1  -4  -1  159.38    9.70
  -1  -4  -1  152.48    9.40
   1   4   1  174.18    9.70
   1   4   1  172.18    9.70
  -2  -4  -1    1.70    1.40
  -2  -4  -1    0.80    1.30
   2   4   1   -1.20    1.00
   2   4   1    2.20    1.30
  -3  -4  -1   49.70    4.60
  -3  -4  -1   50.79    4.50
   3   4   1   58.59    4.50
   3   4   1   57.49    4.50
  -4  -4  -1   31.70    4.20
   4   4   1   32.30    4.00
  -5  -4  -1  130.59    9.70
   5   4   1  130.29    8.40
   5   4   1  127.39    9.20
  -6  -4  -1    7.90    3.10
   6   4   1    2.80    2.40
  -7  -4  -1  120.79   10.30
   7   4   1  107.59    9.50
  -8  -4  -1   17.70    5.50
  -8   5   1   35.90    5.80
  -7   5   1    3.40    2.70
  -6   5   1   90.39    6.20
  -6   5   1   78.29    6.80
  -5   5   1   30.00    3.50
  -5   5   1   27.10    3.30
  -5   5   1   23.30    3.20
   4  -5  -1   55.39    3.80
  -4   5   1   54.39    4.20
  -4   5   1   55.29    4.50
  -4   5   1   53.09    4.10
   3  -5  -1  243.48   13.70
   3  -5  -1  243.78   13.70
  -3   5   1  246.48   13.90
  -3   5   1  246.78   14.50
  -3   5   1  247.98   14.00
  -2   5   1   53.79    3.20
  -2   5   1   54.09    3.20
  -1   5   1  999.30   56.59
  -1   5   1 1078.99   56.59
   0  -5  -1   11.40    1.30
   0  -5  -1   10.50    1.30
   0   5   1   12.20    1.40
   0   5   1   10.50    1.50
   0   5   1   10.70    1.30
  -1  -5  -1  613.44   35.90
  -1  -5  -1  663.83   36.30
  -1  -5  -1  638.84   36.20
   1   5   1  674.63   36.20
   1   5   1  672.33   36.20
  -2  -5  -1   54.49    4.60
  -2  -5  -1   53.99    4.00
  -2  -5  -1   59.19    4.50
   2   5   1   62.79    4.50
   2   5   1   59.39    4.60
  -3  -5  -1  260.57   16.50
  -3  -5  -1  275.27   16.50
   3   5   1  283.87   16.50
   3   5   1  282.27   16.50
  -4  -5  -1  115.69    8.20
   4   5   1  107.89    7.90
  -5  -5  -1    4.10    2.70
   5   5   1    6.50    2.60
  -6  -5  -1   92.49    8.90
   6   5   1   63.49    6.50
   7   5   1    3.70    2.90
  -8  -5  -1   24.40    5.90
  -8   6   1   12.80    3.90
  -7   6   1   10.50    3.00
  -6   6   1   17.80    2.90
  -6   6   1   13.00    2.70
   5  -6  -1   25.60    2.60
  -5   6   1   31.90    3.40
  -5   6   1   36.90    4.20
  -5   6   1   38.70    3.70
   4  -6  -1  163.38    9.20
   4  -6  -1  159.68    9.20
  -4   6   1  159.28   10.30
  -4   6   1  157.98    9.60
  -4   6   1  161.58    9.60
  -3   6   1   53.69    3.50
  -3   6   1   49.30    4.30
  -3   6   1   59.49    3.60
  -1   6   1   44.70    2.70
  -1   6   1   41.60    2.70
   0  -6  -1  622.64   35.20
   0  -6  -1  620.24   35.20
   0   6   1  596.14   35.30
   0   6   1  665.03   35.30
   0   6   1  689.43   35.30
  -1  -6  -1    4.10    1.10
  -1  -6  -1    5.10    1.40
  -1  -6  -1    5.00    1.50
   1   6   1    7.60    1.50
   1   6   1    6.30    1.50
  -2  -6  -1  425.36   24.30
  -2  -6  -1  412.76   24.80
  -2  -6  -1  429.16   24.70
   2   6   1  460.05   24.80
   2   6   1  438.56   24.80
  -3  -6  -1   98.29    7.20
   3   6   1   98.19    7.00
   3   6   1   96.39    6.90
  -4  -6  -1   14.70    3.20
   4   6   1    8.30    2.50
  -5  -6  -1    3.00    2.50
   5   6   1    2.70    2.20
  -6  -6  -1    4.70    2.90
   6   6   1    0.80    2.40
  -7  -6  -1    5.90    3.80
   7   6   1    0.80    2.60
  -8  -6  -1   39.20    7.10
   8   6   1   24.80    5.40
  -7   7   1   -0.90    1.90
  -6   7   1   99.69    7.50
  -6   7   1  110.29    8.10
   5  -7  -1   -0.60    0.70
  -5   7   1   -0.60    1.10
  -5   7   1    0.10    1.10
  -5   7   1    3.10    1.90
  -4   7   1  172.88   10.20
  -4   7   1  172.28   10.20
  -4   7   1  176.78   11.20
  -3   7   1   11.50    1.10
  -3   7   1   11.90    2.20
  -3   7   1   11.50    1.20
  -1   7   1   56.99    3.50
  -1   7   1   52.39    3.40
   0  -7  -1   22.20    2.10
   0  -7  -1   19.60    2.10
   0   7   1   23.10    2.30
   0   7   1   19.90    2.20
   0   7   1   21.90    2.20
  -1  -7  -1   14.50    2.20
  -1  -7  -1   10.60    1.90
  -1  -7  -1   12.40    1.40
   1   7   1   14.40    2.10
   1   7   1   10.50    1.80
  -2  -7  -1  292.57   16.40
  -2  -7  -1  277.07   16.90
  -2  -7  -1  293.37   17.10
   2   7   1  307.47   17.10
   2   7   1  267.87   16.90
  -3  -7  -1   91.09    7.10
  -3  -7  -1   93.59    6.30
   3   7   1   95.99    6.90
  -4  -7  -1  227.98   14.80
   4   7   1  231.58   14.70
  -5  -7  -1    6.10    2.80
   5   7   1    7.40    2.70
  -6  -7  -1  109.69    9.40
   6   7   1   97.19    8.60
  -7  -7  -1    3.70    3.80
   7   7   1    6.80    3.20
  -8  -7  -1   38.40    9.80
  -7   8   1   56.49    5.50
  -6   8   1    6.70    2.70
  -6   8   1    8.10    2.10
  -5   8   1  107.69    7.00
  -5   8   1  111.69    8.30
  -5   8   1  108.99    7.10
  -4   8   1  102.29    6.00
  -4   8   1   96.09    6.00
  -4   8   1   93.89    7.30
  -3   8   1   49.80    4.50
   1  -8  -1   10.00    1.10
   1  -8  -1   11.40    1.00
  -1   8   1   11.50    1.30
  -1   8   1   10.00    1.30
  -1   8   1   12.20    2.00
   0  -8  -1  483.05   27.70
   0  -8  -1  492.05   27.90
   0   8   1  536.65   28.00
   0   8   1  466.25   27.80
   0   8   1  517.75   27.90
  -1  -8  -1    4.40    0.80
  -1  -8  -1    4.10    1.50
  -1  -8  -1    7.10    1.80
   1   8   1    3.20    1.50
   1   8   1    5.10    1.60
  -2  -8  -1  154.38    9.20
  -2  -8  -1  155.18   10.00
   2   8   1  144.09    9.80
   2   8   1  162.78   10.00
  -3  -8  -1   13.10    2.70
   3   8   1   13.40    2.70
  -4  -8  -1   32.80    4.60
  -4  -8  -1   25.60    3.30
   4   8   1   26.20    4.20
  -5  -8  -1   62.79    7.10
   5   8   1   64.79    7.00
  -6  -8  -1    0.20    3.00
   6   8   1   -0.60    2.60
  -7  -8  -1   29.30    5.90
   7   8   1   39.70    6.10
  -7   9   1    2.70    1.80
  -6   9   1   43.60    4.00
  -6   9   1   44.90    5.60
  -5   9   1   38.90    3.20
  -5   9   1   56.49    5.70
  -4   9   1   55.49    3.40
  -4   9   1   57.09    5.30
  -4   9   1   51.49    3.30
  -3   9   1  150.48   10.20
  -2   9   1    4.80    0.60
   1  -9  -1  406.36   22.70
   1  -9  -1  399.86   22.80
  -1   9   1  428.66   23.10
  -1   9   1  419.06   23.70
  -1   9   1  416.06   23.10
   0  -9  -1   10.90    1.80
   0  -9  -1   13.70    1.80
   0   9   1   12.70    1.80
   0   9   1   10.10    1.80
   0   9   1   14.70    2.00
  -1  -9  -1  381.56   22.10
   1   9   1  368.86   22.10
   1   9   1  397.16   22.10
  -2  -9  -1   -1.60    1.30
  -2  -9  -1   -0.40    0.80
   2   9   1    0.00    1.60
   2   9   1   -1.00    1.40
  -3  -9  -1  202.08   12.60
  -3  -9  -1  194.68   11.60
   3   9   1  175.08   12.20
  -4  -9  -1   32.50    3.70
  -4  -9  -1   30.10    4.70
   4   9   1   31.50    4.50
  -5  -9  -1   11.60    4.00
   5   9   1   13.30    3.30
  -6  -9  -1   20.30    5.10
   6   9   1   15.10    3.80
  -7  -9  -1   30.10    5.90
   7   9   1   23.50    4.90
  -6  10   1    2.70    2.70
  -6  10   1    3.00    1.30
  -5  10   1  104.59    6.40
  -5  10   1  113.99    8.60
  -4  10   1    0.70    1.90
  -3  10   1  105.09    8.00
  -2  10   1   14.80    1.50
  -2  10   1   16.60    1.30
   1 -10  -1    5.20    1.00
   1 -10  -1    4.60    0.80
  -1  10   1    2.10    1.00
  -1  10   1    4.60    1.60
   0 -10  -1    0.20    1.00
   0 -10  -1    0.10    1.10
   0  10   1   -0.60    1.00
   0  10   1   -0.10    1.10
   0  10   1   -1.50    1.00
  -1 -10  -1   78.49    5.80
   1  10   1   82.69    5.90
   1  10   1   75.09    5.80
  -2 -10  -1   13.20    1.40
  -2 -10  -1   13.00    2.60
   2  10   1   11.40    2.30
   2  10   1   10.00    2.30
  -3 -10  -1  130.39    8.00
  -3 -10  -1  123.89    9.30
   3  10   1  121.59    9.10
  -4 -10  -1   -1.30    2.20
   4  10   1    1.20    2.00
  -5 -10  -1  106.99    9.10
   5  10   1   95.69    8.30
  -6 -10  -1   -2.40    3.00
   6  10   1    0.30    2.60
  -7 -10  -1   28.70    5.80
   7  10   1   21.00    4.90
  -6  11   1   25.20    4.90
  -5  11   1    0.30    2.10
  -4  11   1   16.80    3.60
  -3  11   1   59.89    5.90
  -2  11   1    9.50    1.10
  -2  11   1   11.00    1.30
  -2  11   1   12.70    2.60
   1 -11  -1  228.98   12.80
   1 -11  -1  225.08   12.90
  -1  11   1  212.58   13.10
  -1  11   1  243.48   13.80
   0 -11  -1   -0.10    1.00
   0  11   1    1.60    1.20
   0  11   1   -1.40    1.10
   0  11   1   -0.40    1.00
  -1 -11  -1  115.69    7.80
   1  11   1  110.09    7.80
  -2 -11  -1   16.40    3.00
   2  11   1   14.70    2.90
   2  11   1   13.90    2.90
  -3 -11  -1   51.79    4.00
  -3 -11  -1   59.99    6.30
   3  11   1   56.09    5.90
  -4 -11  -1   40.30    5.70
   4  11   1   47.40    5.80
  -5 -11  -1   -0.20    2.70
   5  11   1   -0.10    2.50
  -6 -11  -1   17.40    4.70
   6  11   1   18.00    4.40
  -7 -11  -1   10.70    4.60
   7  11   1   12.90    4.70
  -5  12   1  140.39   10.70
  -4  12   1   75.19    7.80
  -3  12   1   -0.80    2.30
  -2  12   1  259.27   15.50
  -2  12   1  297.07   16.90
   1 -12  -1   53.69    3.50
   1 -12  -1   50.29    3.60
  -1  12   1   55.59    4.70
   0 -12  -1  269.27   16.90
   0  12   1  294.17   16.60
   0  12   1  303.47   17.20
  -1 -12  -1   45.70    4.70
   1  12   1   43.00    4.60
  -2 -12  -1  185.88   11.90
   2  12   1  167.28   11.70
  -3 -12  -1   67.79    6.30
   3  12   1   60.09    6.00
  -4 -12  -1   22.50    4.50
   4  12   1   29.20    4.80
  -5 -12  -1   15.00    4.40
   5  12   1   17.10    4.10
  -6 -12  -1   -3.60    3.00
   6  12   1   -1.20    2.60
  -5  13   1   16.00    4.00
  -4  13   1   47.90    6.30
  -3  13   1    1.30    2.20
  -3  13   1   -1.40    2.80
  -2  13   1    1.80    1.00
  -2  13   1    3.10    2.00
  -2  13   1    1.50    0.90
   1 -13  -1   42.30    3.20
   1 -13  -1   40.40    3.00
  -1  13   1   42.40    4.20
   0 -13  -1    4.30    1.70
   0  13   1    3.10    1.20
   0  13   1    5.30    1.80
   0  13   1    6.70    1.90
  -1 -13  -1   61.79    5.30
   1  13   1   58.29    5.50
  -2 -13  -1   94.59    7.40
   2  13   1   80.89    7.20
  -3 -13  -1   25.50    4.40
   3  13   1   23.50    4.10
  -4 -13  -1   69.39    7.80
   4  13   1   80.89    7.50
  -5 -13  -1    0.60    3.20
   5  13   1    0.60    2.60
  -6 -13  -1   49.10    7.50
   6  13   1   39.60    6.30
  -5  14   1   10.40    3.80
  -4  14   1   76.39    7.60
  -4  14   1   74.59    7.40
  -3  14   1    9.50    3.10
  -3  14   1   11.50    3.70
  -2  14   1   32.30    2.90
  -2  14   1   40.70    4.70
  -2  14   1   23.90    3.10
  -1  14   1   20.70    2.70
  -1  14   1   21.20    3.30
   0  14   1  226.78   13.90
   0  14   1  219.68   12.80
  -1 -14  -1    3.80    2.10
   1  14   1    5.30    2.20
  -2 -14  -1  108.19    8.30
   2  14   1   99.49    8.20
  -3 -14  -1    1.80    2.50
   3  14   1    2.20    2.60
  -4 -14  -1   -1.50    2.60
   4  14   1   -2.70    2.20
  -5 -14  -1   29.60    5.60
   5  14   1   28.60    5.50
  -6 -14  -1    8.10    4.40
  -5  15   1   19.00    4.70
  -5  15   1   19.50    5.00
  -4  15   1   11.60    3.90
  -4  15   1    6.90    3.30
  -3  15   1   57.89    6.60
  -3  15   1   59.29    7.40
  -2  15   1    4.90    1.50
  -2  15   1    5.90    2.70
  -2  15   1   10.00    3.50
  -1  15   1  228.88   14.10
  -1  15   1  239.38   14.50
   1  15   1  105.79    8.30
   2  15   1    8.20    3.10
  -3 -15  -1    2.10    2.60
   3  15   1    2.70    2.50
  -4 -15  -1   35.90    5.70
   4  15   1   23.10    4.60
  -5 -15  -1    1.90    3.70
   5  15   1    3.30    3.00
  -5  16   1   34.40    6.20
  -5  16   1   20.80    5.20
  -4  16   1   14.90    4.30
  -4  16   1    7.70    3.40
  -3  16   1   21.30    4.80
  -3  16   1   18.10    4.00
  -2  16   1   33.30    3.30
  -2  16   1   51.39    7.00
  -1  16   1    0.70    1.50
   1  16   1   18.00    3.60
   2  16   1    4.70    2.70
   3  16   1   56.99    6.90
   4  16   1    5.20    3.30
  -4  17   1   -3.10    2.50
  -3  17   1   42.00    6.80
  -2  17   1    3.00    1.60
  -2  17   1    0.70    3.20
  -1  17   1   76.19    6.10
   2  17   1    4.00    3.00
   3  17   1   16.40    4.50
   4  17   1    5.30    3.60
  -3  18   1    5.40    3.60
  -2  18   1   27.50    6.10
  -1  18   1    2.30    1.90
   0  18   1   34.00    4.60
   3  18   1   37.40    6.00
  -2  19   1   -2.90    3.10
  -1  19   1    9.50    4.70
  -1  19   1    4.50    2.20
   0  19   1    5.10    2.60
   1  19  -2   -0.40    3.90
   1  19  -2   -0.10    3.30
   0  19  -2    9.80    3.60
   0  19  -2    9.00    4.30
  -1  19  -2    2.50    2.60
  -1  19  -2   -3.30    3.10
   2  18  -2   13.70    4.70
   2  18  -2    9.70    4.20
   1  18  -2    4.10    3.80
   1  18  -2    1.20    3.00
   0  18  -2   79.99    7.60
   0  18  -2   83.39   10.00
  -1  18  -2   -2.50    3.50
  -1  18  -2   -2.70    2.10
  -2  18  -2   44.10    5.00
  -2  18  -2   48.20    7.60
  -3  18  -2    6.10    4.30
   3  17  -2    2.30    3.20
   2  17  -2   13.00    4.10
   2  17  -2    3.40    3.30
   1  17  -2   34.40    5.60
   1  17  -2   45.90    6.90
   0  17  -2    4.10    3.70
   0  17  -2    4.80    2.80
  -1  17  -2   90.49   10.00
  -1  17  -2   76.09    6.70
  -2  17  -2   -2.00    1.80
  -2  17  -2   -2.20    2.90
  -3  17  -2   46.10    7.30
  -4  17  -2    6.30    4.00
   2  16  -2   -0.20    2.80
   1  16  -2   28.20    5.30
   1  16  -2   31.90    5.00
   0  16  -2   22.60    4.00
   0  16  -2   18.10    4.80
  -1  16  -2   -1.60    2.70
  -1  16  -2    2.30    2.00
  -2  16  -2   -1.20    2.70
  -2  16  -2    0.20    1.90
  -3  16  -2   23.70    5.40
  -4  16  -2    3.70    3.20
  -5 -15   2    4.40    4.40
  -4 -15   2    6.70    3.80
  -3 -15   2    0.60    3.50
   1  15  -2   88.69    7.70
   0  15  -2   -1.30    1.90
   0  15  -2    1.30    2.70
  -1  15  -2  207.08   15.10
  -1  15  -2  214.88   13.50
  -2  15  -2   22.20    3.20
  -2  15  -2   13.80    4.10
  -3  15  -2  126.19   10.60
  -3  15  -2  110.19    7.10
  -4  15  -2    4.90    3.50
  -5  15  -2   11.40    4.10
  -5 -14   2   51.39    7.30
  -4 -14   2    7.20    4.10
  -3 -14   2   -0.70    2.40
  -2 -14   2   96.79    8.40
   1  14  -2   -2.90    1.80
  -1 -14   2    3.30    2.40
   0  14  -2   56.79    7.10
   0  14  -2   66.89    5.80
  -1  14  -2    2.90    2.80
  -1  14  -2    6.40    2.20
  -1  14  -2    5.40    1.70
  -2  14  -2   19.90    3.30
  -2  14  -2   27.00    3.30
  -2  14  -2   13.10    4.10
  -3  14  -2    7.90    1.70
  -3  14  -2   13.40    3.80
  -4  14  -2   18.50    4.40
  -5  14  -2   11.60    4.20
  -6  14  -2   -1.60    3.10
  -6 -13   2   34.60    6.50
   5  13  -2   14.40    4.10
  -5 -13   2   15.50    4.60
   4  13  -2  144.99   11.90
  -4 -13   2  177.38   12.70
   3  13  -2    3.80    2.80
  -3 -13   2    5.60    3.20
  -2 -13   2  133.39   10.00
   1  13  -2   -0.20    1.60
  -1 -13   2    2.70    2.00
   0  13  -2    2.90    1.80
   0  13  -2    1.70    1.90
   0 -13   2    1.50    1.90
  -1  13  -2   99.59    6.60
  -1  13  -2   98.49    6.90
  -1  13  -2   88.59    8.30
  -1  13  -2  103.49    7.10
  -2  13  -2   -0.50    1.50
  -2  13  -2    1.50    2.40
  -2  13  -2   -0.60    1.80
  -3  13  -2    8.70    1.60
  -3  13  -2    7.30    3.00
  -4  13  -2   61.19    7.50
  -5  13  -2    3.10    2.90
  -6  13  -2  102.79    9.90
   6  12  -2    1.30    3.10
  -6 -12   2    5.40    3.90
   5  12  -2    2.30    2.70
  -5 -12   2    4.50    3.80
   4  12  -2   -0.50    2.30
  -4 -12   2   -0.50    2.80
   3  12  -2   64.99    7.00
  -3 -12   2   71.99    7.70
   2  12  -2  104.29    8.50
  -2 -12   2  113.19    8.70
   1  12  -2    2.70    2.00
  -1 -12   2    2.80    2.00
   0  12  -2  230.18   14.20
   0  12  -2  241.18   14.40
   0 -12   2  223.38   14.30
  -1  12  -2   22.20    2.50
  -1  12  -2   19.80    2.90
  -1  12  -2   19.40    2.70
  -1  12  -2   20.70    4.20
  -2  12  -2  159.48   11.20
  -2  12  -2  146.49    9.30
  -2  12  -2  142.79    9.00
  -3  12  -2   29.20    2.60
  -3  12  -2   27.80    2.50
  -3  12  -2   34.90    5.00
  -4  12  -2  144.79    8.30
  -4  12  -2  134.79   11.00
  -5  12  -2   42.10    6.20
  -6  12  -2   14.30    4.20
   6  11  -2   40.70    6.50
  -6 -11   2   49.90    7.50
   5  11  -2   12.80    3.60
  -5 -11   2    6.90    3.80
   4  11  -2  113.79    9.40
  -4 -11   2  126.29    9.90
   3  11  -2   14.80    3.20
  -3 -11   2    8.20    3.00
   2  11  -2  167.58   11.90
  -2 -11   2  191.18   12.20
   1  11  -2  186.88   12.00
  -1 -11   2  189.38   12.20
   0  11  -2    5.80    1.90
   0  11  -2    8.30    2.10
   0 -11   2    8.30    2.10
  -1  11  -2   92.99    7.70
  -1  11  -2   93.59    6.40
  -1  11  -2  100.49    6.60
  -2  11  -2   19.90    3.90
  -2  11  -2   22.60    2.70
  -2  11  -2   19.40    2.30
  -3  11  -2    7.70    3.10
  -3  11  -2    7.10    1.40
  -3  11  -2    6.70    1.20
  -4  11  -2   66.19    4.50
  -4  11  -2   79.59    4.70
  -4  11  -2   60.79    7.10
  -5  11  -2   34.80    2.90
  -5  11  -2   33.20    5.50
  -6  11  -2   70.59    8.10
  -7 -10   2   52.49    8.30
   6  10  -2    0.00    2.70
  -6 -10   2   -0.90    3.00
   5  10  -2  110.89    9.30
  -5 -10   2  105.09    9.70
   4  10  -2    3.00    2.30
  -4 -10   2    0.70    1.20
  -4 -10   2   -0.50    2.40
   3  10  -2  223.88   14.80
  -3 -10   2  223.38   13.00
  -3 -10   2  230.98   13.00
  -3 -10   2  236.48   15.10
   2  10  -2    6.50    2.30
   2  10  -2    7.90    2.50
  -2 -10   2    6.60    2.60
   1  10  -2   86.59    6.50
  -1 -10   2   88.69    6.70
   0  10  -2    2.20    1.50
   0  10  -2    3.30    1.40
   0 -10   2    2.00    1.40
  -1  10  -2   63.79    5.90
  -1  10  -2   68.19    4.80
  -1  10  -2   71.49    5.00
   1 -10   2   59.79    4.70
   1 -10   2   70.79    4.60
  -2  10  -2   42.80    3.20
  -2  10  -2   43.30    3.60
  -2  10  -2   44.00    5.20
   2 -10   2   41.60    2.70
   2 -10   2   41.00    2.60
  -3  10  -2   68.99    4.50
  -3  10  -2   63.59    4.40
  -3  10  -2   66.19    6.10
  -4  10  -2   18.20    2.20
  -4  10  -2   19.80    3.70
  -4  10  -2   22.40    2.20
  -5  10  -2  109.79    7.10
  -5  10  -2  112.49    9.30
  -6  10  -2    0.90    1.40
  -6  10  -2    2.00    2.70
   7   9  -2   19.40    4.90
  -7  -9   2   34.40    6.30
   6   9  -2    9.50    3.60
  -6  -9   2   12.90    4.20
   5   9  -2    2.60    2.60
  -5  -9   2    5.10    3.10
   4   9  -2    6.30    2.80
  -4  -9   2    2.70    2.80
   3   9  -2   50.69    5.60
  -3  -9   2   54.29    5.90
  -3  -9   2   46.40    3.60
   2   9  -2    6.20    2.10
   2   9  -2    6.30    2.20
  -2  -9   2    6.40    2.30
   1   9  -2  372.66   21.20
   1   9  -2  336.37   21.10
  -1  -9   2  374.06   21.30
   0   9  -2    0.80    0.50
   0   9  -2    2.00    1.50
   0   9  -2    1.30    1.20
   0  -9   2    0.80    1.30
   0  -9   2    1.20    1.30
  -1   9  -2  528.25   28.90
  -1   9  -2  513.25   29.90
  -1   9  -2  504.15   28.80
   1  -9   2  551.04   28.60
   1  -9   2  468.45   28.80
  -2   9  -2    1.20    1.20
  -2   9  -2    0.10    0.70
  -2   9  -2   -0.30    1.50
   2  -9   2    1.00    0.50
   2  -9   2    0.60    0.60
  -3   9  -2  225.78   14.30
  -3   9  -2  213.68   12.80
  -3   9  -2  224.28   12.70
  -4   9  -2    4.50    2.30
  -4   9  -2    9.20    1.60
  -4   9  -2    7.40    1.60
  -5   9  -2   44.80    4.00
  -5   9  -2   51.39    6.00
  -6   9  -2    5.90    2.10
  -6   9  -2    5.90    3.00
  -7   9  -2    4.20    2.10
   7   8  -2   58.89    7.40
  -7  -8   2   37.90    6.50
   6   8  -2    7.40    3.20
  -6  -8   2   10.10    3.60
   5   8  -2  108.19    8.80
  -5  -8   2  104.79    9.20
   4   8  -2    2.10    2.00
  -4  -8   2    0.40    2.40
   3   8  -2   84.69    6.90
  -3  -8   2   94.09    7.40
   2   8  -2  104.69    7.50
   2   8  -2  111.49    7.50
  -2  -8   2   96.19    7.40
  -2  -8   2  100.99    6.00
   1   8  -2  336.17   18.90
   1   8  -2  303.87   18.80
  -1  -8   2  324.97   19.00
   0   8  -2  146.89    8.60
   0   8  -2  160.98    9.50
   0  -8   2  158.08    9.60
   0  -8   2  154.48    9.40
  -1   8  -2   12.10    1.90
  -1   8  -2   11.40    1.70
  -1   8  -2   10.20    2.40
   1  -8   2   10.60    1.50
   1  -8   2   14.70    2.00
  -2   8  -2  220.98   12.80
  -2   8  -2  228.88   13.90
  -2   8  -2  212.88   12.90
   2  -8   2  234.48   12.40
   2  -8   2  212.68   12.40
  -3   8  -2   84.49    5.80
  -3   8  -2   94.49    7.10
  -3   8  -2   92.79    5.70
  -4   8  -2    7.90    2.60
  -4   8  -2    4.20    1.40
  -4   8  -2    5.00    1.40
  -5   8  -2   56.19    6.30
  -5   8  -2   59.49    6.30
  -5   8  -2   48.60    4.40
  -6   8  -2   -1.10    2.30
  -6   8  -2   -2.80    1.30
  -7   8  -2   40.70    4.90
   7   7  -2   12.50    4.00
  -7  -7   2    5.20    4.10
   6   7  -2  118.49    9.90
  -6  -7   2  119.29   10.30
   5   7  -2    5.20    2.80
  -5  -7   2    5.90    3.10
   4   7  -2  229.08   14.80
  -4  -7   2  226.98   15.00
   3   7  -2    5.70    2.20
  -3  -7   2    3.60    2.10
   2   7  -2  160.78   10.80
   2   7  -2  185.58   11.00
  -2  -7   2  158.98    9.80
  -2  -7   2  188.48   11.20
   1   7  -2  130.29    8.60
   1   7  -2  144.69    8.70
  -1  -7   2  126.79    8.50
  -1  -7   2  133.09    8.70
   0   7  -2  132.69    7.60
   0   7  -2  111.79    6.80
   0  -7   2  117.29    7.70
   0  -7   2  121.79    7.50
  -1   7  -2  223.38   13.30
  -1   7  -2  228.48   13.30
  -1   7  -2  252.57   14.20
   1  -7   2  205.38   13.30
   1  -7   2  244.28   13.10
  -2   7  -2  190.78   11.80
  -2   7  -2  181.08   10.90
  -2   7  -2  185.38   10.90
   2  -7   2  192.98   10.40
   2  -7   2  179.48   10.40
  -3   7  -2   28.70    3.80
  -3   7  -2   31.90    2.60
  -3   7  -2   28.30    2.60
   3  -7   2   30.10    1.90
  -4   7  -2  210.48   12.20
  -4   7  -2  205.38   12.20
  -4   7  -2  220.78   13.50
   4  -7   2  202.98   11.50
   4  -7   2  197.38   11.60
  -5   7  -2    2.30    1.40
  -5   7  -2   -2.60    1.80
  -5   7  -2    0.90    1.40
  -6   7  -2   91.09    7.10
  -6   7  -2  101.39    8.30
  -7   7  -2   -0.60    2.00
  -8   7  -2   71.49    7.70
   7   6  -2    3.50    2.90
  -7  -6   2   -1.40    3.00
   6   6  -2   10.20    3.30
  -6  -6   2   17.20    3.90
   5   6  -2   -2.30    1.70
  -5  -6   2    3.10    2.40
   4   6  -2   84.99    7.10
  -4  -6   2   97.19    7.60
   3   6  -2    6.40    2.10
  -3  -6   2    7.50    2.40
   2   6  -2  406.66   23.10
   2   6  -2  413.56   23.10
  -2  -6   2  398.56   23.20
  -2  -6   2  371.56   23.00
   1   6  -2   35.30    3.50
   1   6  -2   43.90    3.60
  -1  -6   2   43.30    3.60
  -1  -6   2   39.30    3.70
   0   6  -2  969.10   50.29
   0   6  -2  928.61   50.29
   0   6  -2  839.32   49.70
   0  -6   2  884.81   50.29
   0  -6   2  932.61   50.19
  -1   6  -2   34.40    3.00
  -1   6  -2   47.70    3.80
  -1   6  -2   40.30    3.10
   1  -6   2   42.40    2.90
   1  -6   2   36.20    3.00
  -2   6  -2  312.37   20.90
  -2   6  -2  355.06   20.30
  -2   6  -2  390.76   20.30
   2  -6   2  372.66   19.90
  -3   6  -2    3.80    1.10
  -3   6  -2    4.30    1.20
  -3   6  -2    2.10    1.60
   3  -6   2    4.50    1.00
   3  -6   2    4.10    0.80
  -4   6  -2   17.40    3.00
  -4   6  -2   15.80    2.20
  -4   6  -2   18.60    2.40
   4  -6   2   15.10    2.00
   4  -6   2   14.10    1.80
  -5   6  -2   -1.80    1.20
  -5   6  -2   -2.60    1.30
  -5   6  -2    0.90    1.80
   5  -6   2   -0.60    0.70
  -6   6  -2    2.80    1.90
  -6   6  -2   -1.00    2.00
  -7   6  -2    1.90    2.30
  -8   6  -2    4.90    3.10
   7   5  -2   21.80    4.50
  -7  -5   2   25.90    5.00
   6   5  -2  116.99    9.50
  -6  -5   2  119.09    9.80
   5   5  -2    1.60    2.00
  -5  -5   2    6.70    2.70
   4   5  -2  307.17   18.20
  -4  -5   2  289.17   18.40
   3   5  -2    7.60    2.10
  -3  -5   2   12.20    2.70
   2   5  -2  246.28   13.70
   2   5  -2  214.48   13.50
  -2  -5   2  211.88   13.40
  -2  -5   2  223.38   13.70
   1   5  -2   11.60    1.90
   1   5  -2   10.60    1.80
  -1  -5   2   12.80    2.10
  -1  -5   2   16.80    2.20
  -1  -5   2   12.10    1.20
   0   5  -2   20.00    2.20
   0   5  -2   17.10    1.40
   0   5  -2   21.00    2.20
   0  -5   2   19.10    2.00
   0  -5   2   20.00    2.20
  -1   5  -2  126.89    8.00
  -1   5  -2  125.19    7.50
  -1   5  -2  120.99    7.50
   1  -5   2  121.39    7.40
  -2   5  -2    9.00    1.50
  -2   5  -2   10.80    1.50
  -2   5  -2    8.80    2.00
   2  -5   2   10.20    1.20
   2  -5   2    9.20    1.30
  -3   5  -2   17.90    2.10
  -3   5  -2   16.40    2.60
  -3   5  -2   18.00    2.10
   3  -5   2   18.80    2.00
   3  -5   2   13.90    1.60
  -4   5  -2  269.57   15.60
  -4   5  -2  277.17   16.50
  -4   5  -2  249.18   15.60
   4  -5   2  275.47   15.40
  -5   5  -2   19.30    2.80
  -5   5  -2   23.50    3.60
  -5   5  -2   21.80    3.10
   5  -5   2   17.90    2.40
  -6   5  -2  116.09    8.70
  -6   5  -2  124.89    8.90
  -7   5  -2    1.30    2.40
  -8   5  -2   60.29    7.10
  -8  -4   2   32.10    6.70
   7   4  -2   86.19    8.40
  -7  -4   2   95.69    9.20
   6   4  -2    3.10    2.50
  -6  -4   2    1.10    2.80
   5   4  -2  318.07   19.40
  -5  -4   2  311.87   19.80
   4   4  -2    1.90    1.70
  -4  -4   2    1.70    1.90
   3   4  -2  598.34   33.20
   3   4  -2  637.34   34.00
  -3  -4   2  546.95   33.10
  -3  -4   2  555.54   33.30
   2   4  -2  116.69    7.60
   2   4  -2  112.39    7.50
  -2  -4   2  111.69    7.50
  -2  -4   2  118.59    7.80
   1   4  -2  177.98   10.40
   1   4  -2  177.58   10.30
  -1  -4   2  185.38   10.50
  -1  -4   2  181.48   10.30
  -1  -4   2  148.99    9.70
   0   4  -2  169.58   10.20
   0   4  -2  173.78   10.00
   0   4  -2  170.38    9.60
   0   4  -2  186.08   10.10
   0  -4   2  148.29   10.00
   0  -4   2  175.18   10.00
  -1   4  -2   17.70    2.00
  -1   4  -2   16.70    2.30
  -1   4  -2   16.00    1.90
   1  -4   2   18.60    1.90
   1  -4   2   19.50    1.80
  -2   4  -2  260.37   14.10
  -2   4  -2  225.48   14.10
  -2   4  -2  268.57   14.80
   2  -4   2  259.27   14.70
   2  -4   2  237.68   14.10
  -3   4  -2  189.88   12.20
  -3   4  -2  214.28   11.70
  -3   4  -2  196.18   11.60
   3  -4   2  206.98   11.50
   3  -4   2  185.58   11.90
   3  -4   2  197.28   11.50
  -4   4  -2    7.10    2.00
  -4   4  -2    5.80    1.50
  -4   4  -2    5.20    1.60
   4  -4   2    6.60    1.70
   4  -4   2    5.90    1.40
   4  -4   2    4.10    1.30
  -5   4  -2  248.18   16.00
  -5   4  -2  280.67   16.20
  -5   4  -2  285.87   16.60
   5  -4   2  259.57   15.80
  -6   4  -2    0.50    1.80
  -6   4  -2    4.80    2.10
  -7   4  -2   82.59    7.80
  -8   4  -2    4.60    3.30
  -8  -3   2    4.50    3.50
   7   3  -2   26.70    4.70
   6   3  -2    6.80    2.90
  -6  -3   2    5.60    3.00
   5   3  -2    2.70    2.10
   5   3  -2    2.40    0.90
   4   3  -2   34.10    4.00
  -4  -3   2   37.40    4.40
  -4  -3   2   34.00    4.50
   3   3  -2  497.75   27.50
   3   3  -2  479.65   27.50
  -3  -3   2  494.85   27.60
  -3  -3   2  447.96   27.60
   2   3  -2  176.78   10.30
   2   3  -2  169.38   10.30
  -2  -3   2  170.88   10.40
  -2  -3   2  155.18   10.30
   1   3  -2 2374.96  131.49
   1   3  -2 2530.65  131.59
  -1  -3   2 2378.96  131.19
  -1  -3   2 2328.37  131.49
  -1  -3   2 2427.46  131.59
   0   3  -2  441.96   25.70
   0   3  -2  486.65   26.00
   0   3  -2  460.95   25.90
   0   3  -2  466.25   26.10
   0  -3   2  475.55   26.00
  -1   3  -2  256.37   13.80
  -1   3  -2  241.78   13.70
  -1   3  -2  207.18   13.90
   1  -3   2  255.77   13.70
   1  -3   2  267.47   14.00
   1  -3   2  214.58   13.50
  -2   3  -2    8.50    1.30
  -2   3  -2    6.70    1.60
  -2   3  -2    7.20    1.40
   2  -3   2    7.60    1.20
   2  -3   2    6.00    1.20
   2  -3   2    4.20    1.40
  -3   3  -2  354.26   20.70
  -3   3  -2  361.56   21.10
  -3   3  -2  360.96   20.60
   3  -3   2  339.77   20.80
   3  -3   2  393.36   20.60
   3  -3   2  375.36   20.50
  -4   3  -2   17.80    2.50
  -4   3  -2   20.10    2.90
  -4   3  -2   20.10    2.60
   4  -3   2   18.60    2.50
   4  -3   2   20.60    2.50
   4  -3   2   18.60    2.30
  -5   3  -2   46.70    4.40
  -5   3  -2   51.29    4.40
  -5   3  -2   47.40    4.40
   5  -3   2   42.70    4.20
   5  -3   2   30.40    3.60
  -6   3  -2   -1.50    1.80
  -6   3  -2   -1.00    1.50
   6  -3   2   -2.20    1.40
  -7   3  -2    4.60    2.60
  -8   3  -2    5.80    3.40
  -8  -2   2    4.90    3.60
  -7  -2   2  134.79   11.00
   5   2  -2  398.76   23.80
  -5  -2   2  401.26   24.10
   4   2  -2   78.09    5.70
   4   2  -2   59.19    4.30
  -4  -2   2   80.09    5.90
  -4  -2   2   82.19    6.10
   3   2  -2  637.84   34.60
   3   2  -2  626.54   34.60
  -3  -2   2  637.84   34.70
  -3  -2   2  551.54   34.60
   2   2  -2   37.60    3.30
   2   2  -2   38.80    3.20
  -2  -2   2   37.70    3.50
  -2  -2   2   38.00    3.40
   1   2  -2   30.80    2.80
  -1  -2   2   32.40    3.00
  -1  -2   2   33.30    2.90
  -1  -2   2   33.90    2.50
   0   2  -2   61.29    4.00
   0   2  -2   68.79    4.20
   0   2  -2   75.09    4.30
   0   2  -2   63.09    4.20
   0  -2   2   69.79    4.40
   0  -2   2   64.59    4.00
   0  -2   2   63.09    4.20
   0  -2   2   63.49    4.20
  -1   2  -2   16.70    2.00
  -1   2  -2   16.50    1.70
  -1   2  -2   16.60    1.80
   1  -2   2   16.80    1.60
   1  -2   2   18.90    2.10
   1  -2   2   15.50    1.70
  -2   2  -2  191.48   10.90
  -2   2  -2  176.08   11.30
  -2   2  -2  205.48   11.00
   2  -2   2  177.88   10.90
   2  -2   2  194.08   10.90
   2  -2   2  189.08   11.20
  -3   2  -2   66.89    5.10
  -3   2  -2   73.49    4.90
  -3   2  -2   70.39    4.90
   3  -2   2   72.29    4.70
   3  -2   2   65.79    4.90
   3  -2   2   70.99    4.80
  -4   2  -2   28.40    3.30
  -4   2  -2   24.80    3.10
  -4   2  -2   29.20    3.30
   4  -2   2   24.20    2.90
   4  -2   2   24.90    2.90
   4  -2   2   39.30    4.60
  -5   2  -2  270.07   14.90
  -5   2  -2  233.48   15.10
  -5   2  -2  241.68   15.00
   5  -2   2  237.88   14.80
   5  -2   2  243.28   14.50
  -6   2  -2    0.60    2.20
  -6   2  -2   -1.20    1.90
   6  -2   2   -2.50    1.50
  -7   2  -2  138.89   10.70
  -8   2  -2    2.60    3.20
  -8  -1   2   30.20    5.90
  -7  -1   2   27.50    5.00
   6   1  -2  523.95   31.20
  -6  -1   2  540.05   31.70
   5   1  -2   11.00    2.50
  -5  -1   2    8.70    2.70
  -5  -1   2    8.10    2.80
   4   1  -2 1050.29   56.29
  -4  -1   2  949.51   56.29
  -4  -1   2 1024.20   56.39
   3   1  -2   41.60    3.60
   3   1  -2   39.10    3.40
   3   1  -2   34.00    2.30
  -3  -1   2   38.40    3.60
  -3  -1   2   34.40    3.70
   2   1  -2   25.90    2.70
   2   1  -2   28.60    2.70
  -2  -1   2   31.40    3.10
  -2  -1   2   24.70    2.80
   1   1  -2    1.40    0.90
   1   1  -2    0.20    0.60
  -1  -1   2    2.60    1.10
  -1  -1   2    0.30    1.00
   0   1  -2   14.40    1.50
   0   1  -2   13.30    1.50
   0   1  -2   14.00    1.50
   0   1  -2   13.50    1.40
   0  -1   2   12.70    1.40
   0  -1   2   10.90    1.40
   0  -1   2   14.10    1.50
   0  -1   2   13.00    1.40
  -1   1  -2   67.39    4.30
  -1   1  -2   76.29    4.40
  -1   1  -2   65.59    4.60
   1  -1   2   70.79    4.40
   1  -1   2   69.29    4.30
   1  -1   2   72.19    4.60
  -2   1  -2  261.27   16.00
  -2   1  -2  281.37   15.70
  -2   1  -2  279.07   15.80
   2  -1   2  277.27   15.70
   2  -1   2  277.97   16.00
   2  -1   2  286.27   15.70
  -3   1  -2    1.20    1.20
  -3   1  -2   -0.20    1.10
  -3   1  -2    0.50    1.10
   3  -1   2    2.10    1.20
   3  -1   2   -0.70    0.80
   3  -1   2   -0.40    1.10
  -4   1  -2   43.10    4.30
  -4   1  -2   46.00    3.70
  -4   1  -2   37.20    4.00
   4  -1   2   41.10    3.90
   4  -1   2   40.50    3.60
  -5   1  -2    5.20    2.00
   5  -1   2    2.70    1.80
   5  -1   2    2.10    1.40
  -6   1  -2   93.89    7.80
  -6   1  -2  100.39    7.80
   6  -1   2   90.89    7.30
  -7   1  -2   25.60    4.60
  -8   1  -2   62.89    7.80
  -8   0   2   50.39    7.30
  -7   0   2    5.30    3.40
   6   0  -2   70.09    6.30
   5   0  -2    6.80    2.20
  -5   0   2   12.40    2.70
  -5   0   2   10.20    2.80
   4   0  -2  347.17   19.60
  -4   0   2  331.67   19.70
  -4   0   2  321.47   19.70
   3   0  -2    0.90    1.30
   3   0  -2    2.60    1.30
  -3   0   2    3.80    1.50
  -3   0   2    3.90    1.60
   2   0  -2   29.50    2.60
   2   0  -2   28.00    2.70
  -2   0   2   23.50    2.60
  -2   0   2   25.80    2.60
   1   0  -2    2.00    0.90
   1   0  -2    0.70    0.50
   1   0  -2    1.10    0.80
  -1   0   2    0.50    0.90
  -1   0   2    0.10    0.40
   0   0  -2  396.06   22.60
   0   0  -2  428.56   22.70
   0   0   2  402.06   22.60
   0   0   2  403.86   22.50
  -1   0  -2    3.10    1.00
  -1   0  -2    3.00    1.00
  -1   0  -2    2.90    1.10
   1   0   2    3.70    1.20
   1   0   2    3.40    1.00
   1   0   2    3.90    1.00
  -2   0  -2 1830.12   97.39
  -2   0  -2 1725.63   97.39
  -2   0  -2 1776.62   97.39
   2   0   2 1749.43   97.29
   2   0   2 1814.82   97.29
   2   0   2 1788.42   97.59
  -3   0  -2  103.09    6.80
  -3   0  -2  101.39    7.00
  -3   0  -2  111.49    7.00
   3   0   2  105.19    6.80
   3   0   2  105.39    6.90
   3   0   2  113.89    7.00
  -4   0  -2  108.19    7.70
  -4   0  -2  103.39    7.70
   4   0   2  122.39    7.60
   4   0   2  119.69    7.70
  -5   0  -2   20.40    3.20
  -5   0  -2   14.30    2.90
   5   0   2   18.40    2.60
   5   0   2   16.20    2.90
  -6   0  -2   27.70    3.90
   6   0   2    4.70    2.70
  -7   0  -2   -2.70    2.50
  -8   0  -2   36.60    6.40
  -8   1   2   15.80    4.30
  -7   1   2   14.10    3.90
  -6   1   2  435.66   26.30
   5  -1  -2   20.00    3.30
  -5   1   2   28.80    3.90
  -5   1   2   30.00    4.00
   4  -1  -2  903.01   49.10
  -4   1   2  853.71   49.30
  -4   1   2  884.41   49.30
   3  -1  -2    2.30    1.10
   3  -1  -2    0.90    1.20
  -3   1   2    2.20    1.30
  -3   1   2    3.70    1.50
   2  -1  -2   65.19    4.20
  -2   1   2   63.49    4.30
  -2   1   2   58.89    4.30
   1  -1  -2   56.59    3.60
   1  -1  -2   54.29    3.50
  -1   1   2   54.49    3.60
  -1   1   2   55.69    3.60
   0  -1  -2    1.40    0.70
   0  -1  -2    0.60    0.80
   0  -1  -2    0.40    0.70
   0   1   2   -1.10    0.50
   0   1   2   -1.30    0.60
   0   1   2    1.70    0.70
  -1  -1  -2   15.00    1.70
  -1  -1  -2   12.30    1.50
  -1  -1  -2   14.00    1.60
   1   1   2   13.70    1.50
   1   1   2   14.20    1.70
   1   1   2   17.80    1.70
  -2  -1  -2  139.09    8.50
  -2  -1  -2  131.09    8.40
   2   1   2  141.49    8.40
   2   1   2  140.69    8.30
   2   1   2  140.39    8.40
  -3  -1  -2   47.90    4.20
  -3  -1  -2   46.90    4.10
   3   1   2   62.99    4.30
   3   1   2   54.59    3.90
   3   1   2   48.10    4.00
  -4  -1  -2  305.27   18.50
  -4  -1  -2  292.07   18.30
   4   1   2  317.97   18.20
   4   1   2  324.47   18.30
  -5  -1  -2    2.00    1.80
  -5  -1  -2    1.50    1.80
   5   1   2   -1.80    1.30
   5   1   2   -2.40    1.50
  -6  -1  -2   86.89    7.50
   6   1   2   78.09    7.00
  -7  -1  -2   18.50    4.50
   7   1   2   14.20    3.50
  -8  -1  -2   56.89    7.80
  -8   2   2   14.70    4.30
  -7   2   2   59.89    6.70
  -6   2   2   17.40    3.40
  -5   2   2  108.09    7.70
  -5   2   2  105.49    7.80
  -4   2   2  164.48   10.70
  -4   2   2  177.28   10.70
   3  -2  -2  299.07   17.20
  -3   2   2  305.77   17.30
  -3   2   2  298.47   17.30
  -3   2   2  300.47   16.80
   2  -2  -2  379.46   23.50
   2  -2  -2  445.96   23.50
  -2   2   2  437.66   23.60
  -2   2   2  430.96   23.60
   1  -2  -2  220.58   12.00
  -1   2   2  222.98   12.10
  -1   2   2  204.38   12.10
   0  -2  -2    9.40    1.00
   0  -2  -2   11.60    1.10
   0  -2  -2    9.00    1.30
   0   2   2    8.90    1.00
   0   2   2    7.70    1.30
   0   2   2    8.40    1.00
  -1  -2  -2   91.49    5.80
  -1  -2  -2   97.59    5.80
  -1  -2  -2   95.99    5.80
   1   2   2  102.59    5.80
   1   2   2   86.29    5.70
   1   2   2   94.59    5.70
  -2  -2  -2  609.34   35.60
  -2  -2  -2  642.64   35.60
   2   2   2  659.43   35.70
   2   2   2  653.33   35.60
  -3  -2  -2   64.69    4.70
  -3  -2  -2   57.59    4.80
   3   2   2   56.89    4.30
   3   2   2   62.69    4.70
   3   2   2   60.89    4.50
  -4  -2  -2  164.38   11.30
  -4  -2  -2  174.78   11.30
   4   2   2  186.28   11.10
   4   2   2  188.28   11.40
  -5  -2  -2  164.78   11.70
   5   2   2  182.88   11.10
   5   2   2  178.78   11.60
  -6  -2  -2   49.80    5.80
   6   2   2   35.50    4.90
  -7  -2  -2   88.39    8.80
   7   2   2  100.59    8.20
  -8  -2  -2   27.50    5.50
  -8   3   2   -1.20    2.80
  -7   3   2   22.30    4.10
  -6   3   2   16.00    3.40
  -5   3   2   32.70    3.90
  -4   3   2   52.89    4.40
  -4   3   2   49.20    3.60
  -4   3   2   55.59    4.30
   3  -3  -2  460.25   25.30
  -3   3   2  455.75   25.20
  -3   3   2  442.26   25.50
  -3   3   2  453.65   25.50
   2  -3  -2   -0.10    0.30
   2  -3  -2    1.30    0.60
  -2   3   2    1.20    0.80
  -2   3   2    1.90    0.80
   1  -3  -2  832.42   47.10
   1  -3  -2  886.51   47.10
  -1   3   2  869.61   47.20
  -1   3   2  868.31   47.20
   0  -3  -2  178.88   10.30
   0  -3  -2  188.18   10.00
   0  -3  -2  170.98   10.00
   0   3   2  162.38   10.30
   0   3   2  187.58   10.00
   0   3   2  172.18   10.00
  -1  -3  -2    5.00    1.30
  -1  -3  -2    6.70    1.40
  -1  -3  -2    8.10    1.40
   1   3   2    8.30    1.40
   1   3   2    8.60    1.40
   1   3   2    7.20    1.40
  -2  -3  -2   14.90    2.30
  -2  -3  -2   16.90    2.30
   2   3   2   16.60    2.20
   2   3   2   16.60    2.10
  -3  -3  -2  157.88   10.50
  -3  -3  -2  166.38   10.40
   3   3   2  162.38   10.30
   3   3   2  181.38   10.50
  -4  -3  -2   72.29    6.00
  -4  -3  -2   78.89    6.00
   4   3   2   77.79    5.80
   4   3   2   68.09    5.20
   5   3   2   11.50    2.80
   5   3   2   10.00    2.10
  -6  -3  -2   19.90    3.90
   6   3   2   13.50    3.40
  -7  -3  -2   18.10    4.10
   7   3   2    6.90    3.00
  -8  -3  -2   13.10    4.60
  -8   4   2    9.00    3.60
  -7   4   2  142.99   10.80
  -6   4   2   -0.10    1.80
  -5   4   2  363.56   20.00
  -5   4   2  337.67   20.70
  -5   4   2  353.16   20.80
   4  -4  -2    3.70    1.20
   4  -4  -2    2.70    1.10
  -4   4   2    4.80    1.50
  -4   4   2    1.70    1.30
  -4   4   2    3.00    1.40
   3  -4  -2  447.56   24.50
  -3   4   2  444.76   24.70
  -3   4   2  433.96   24.70
  -3   4   2  434.86   24.70
   2  -4  -2    9.80    1.00
   2  -4  -2   11.80    1.20
  -2   4   2   12.20    1.30
  -2   4   2   10.70    1.20
  -1   4   2   85.99    5.00
  -1   4   2   87.39    5.00
   0  -4  -2    5.20    0.90
   0  -4  -2    5.20    1.20
   0  -4  -2    6.20    1.00
   0   4   2    6.50    1.00
   0   4   2    6.00    1.30
   0   4   2    5.70    1.00
  -1  -4  -2   24.90    2.40
  -1  -4  -2   20.70    2.30
  -1  -4  -2   22.00    2.30
   1   4   2   23.20    2.30
   1   4   2   21.50    2.20
   1   4   2   22.00    2.10
  -2  -4  -2   59.59    4.50
  -2  -4  -2   64.49    4.70
  -2  -4  -2   69.29    5.00
   2   4   2   64.19    4.80
   2   4   2   71.69    4.70
  -3  -4  -2  259.07   16.90
  -3  -4  -2  277.77   16.90
   3   4   2  308.57   17.00
   3   4   2  299.77   16.90
  -4  -4  -2   -0.20    1.60
   4   4   2   -1.00    1.30
  -5  -4  -2  318.67   20.40
   5   4   2  344.17   20.30
   5   4   2  336.37   19.60
  -6  -4  -2   11.80    3.50
   6   4   2    6.50    2.60
  -7  -4  -2  169.58   12.80
   7   4   2  154.38   11.90
  -8  -4  -2   -0.90    3.40
  -8   5   2   26.90    4.90
  -7   5   2    8.10    2.80
  -6   5   2   85.79    7.00
   5  -5  -2    7.30    1.60
  -5   5   2    8.20    2.10
  -5   5   2    7.30    1.90
  -5   5   2    9.50    2.00
   4  -5  -2  146.29    8.20
  -4   5   2  132.69    8.60
  -4   5   2  131.99    8.50
  -4   5   2  137.59    8.70
   3  -5  -2  232.78   12.70
   3  -5  -2  239.88   12.70
  -3   5   2  209.68   13.20
  -3   5   2  221.58   12.90
  -3   5   2  221.08   12.90
  -2   5   2   32.90    2.30
  -2   5   2   36.40    2.30
  -1   5   2  388.66   23.20
  -1   5   2  418.06   23.20
  -1   5   2  474.25   24.10
   0  -5  -2    7.30    1.10
   0  -5  -2    5.50    1.00
   0  -5  -2    7.20    1.30
   0   5   2    5.40    1.10
   0   5   2    5.60    1.00
   0   5   2    6.10    1.40
  -1  -5  -2  560.84   32.40
  -1  -5  -2  561.54   32.40
  -1  -5  -2  583.24   32.40
   1   5   2  578.74   32.30
   1   5   2  634.34   32.50
   1   5   2  579.64   32.40
  -2  -5  -2   87.69    6.20
  -2  -5  -2   87.79    5.80
  -2  -5  -2   89.79    6.10
   2   5   2   86.09    6.10
   2   5   2   93.89    6.10
  -3  -5  -2   34.70    3.90
  -3  -5  -2   37.60    3.70
   3   5   2   39.60    3.80
   3   5   2   33.50    3.80
  -4  -5  -2  145.49   10.30
   4   5   2  159.88   10.30
  -5  -5  -2   33.60    4.80
   5   5   2   35.60    4.80
   5   5   2   35.40    3.80
  -6  -5  -2   82.89    7.60
   6   5   2   73.09    7.10
   7   5   2    6.80    3.00
  -8  -5  -2   23.70    5.80
  -8   6   2    4.90    3.10
  -7   6   2   37.00    4.90
  -6   6   2   10.00    2.40
   5  -6  -2   76.79    5.20
  -5   6   2   81.19    5.80
  -5   6   2   83.49    6.10
  -5   6   2   70.99    5.60
   4  -6  -2   94.49    5.50
   4  -6  -2   91.19    5.50
  -4   6   2   88.99    5.90
  -4   6   2   91.79    6.50
  -4   6   2   87.89    5.90
  -3   6   2  161.58    9.30
  -3   6   2  159.78   10.00
  -3   6   2  162.28    9.30
  -2   6   2  239.78   13.20
  -1   6   2   21.20    1.60
  -1   6   2   24.00    1.60
  -1   6   2   23.50    2.40
   0  -6  -2  835.02   45.90
   0  -6  -2  890.71   46.00
   0   6   2  829.52   46.00
   0   6   2  853.61   46.00
   0   6   2  772.52   46.20
  -1  -6  -2  183.48   11.10
  -1  -6  -2  193.48   11.20
  -1  -6  -2  179.08   11.10
   1   6   2  188.78   11.20
   1   6   2  185.98   10.90
   1   6   2  199.48   11.20
  -2  -6  -2  221.78   12.70
  -2  -6  -2  197.08   12.80
  -2  -6  -2  207.98   12.90
   2   6   2  229.88   13.00
   2   6   2  214.88   12.90
  -3  -6  -2    5.20    1.60
  -3  -6  -2    5.40    2.00
   3   6   2    7.70    1.90
   3   6   2    7.00    2.00
  -4  -6  -2   78.29    6.60
   4   6   2   75.59    6.30
  -5  -6  -2   10.30    3.20
   5   6   2   12.80    3.20
  -6  -6  -2    4.00    2.70
   6   6   2    3.30    2.40
  -7  -6  -2   31.90    5.80
   7   6   2   25.70    5.00
  -8  -6  -2   37.40    7.30
   8   6   2   42.00    6.50
  -7   7   2    4.20    2.30
  -6   7   2  153.98   10.20
   5  -7  -2    0.40    0.80
  -5   7   2   -0.50    1.10
  -5   7   2   -1.00    1.10
  -5   7   2    1.70    1.70
  -4   7   2  233.98   13.40
  -4   7   2  227.98   13.40
  -4   7   2  237.88   14.30
  -3   7   2   18.80    1.50
  -3   7   2   19.40    1.50
  -3   7   2   18.10    2.60
  -1   7   2    0.30    1.10
  -1   7   2   -0.20    0.50
  -1   7   2    0.40    0.60
   0  -7  -2   72.99    4.90
   0  -7  -2   72.99    4.90
   0   7   2   75.69    5.30
   0   7   2   82.79    5.00
   0   7   2   84.99    5.10
  -1  -7  -2   35.50    3.10
  -1  -7  -2   35.40    3.20
  -1  -7  -2   30.00    2.80
   1   7   2   32.20    3.10
   1   7   2   41.40    3.30
   1   7   2   37.20    2.70
  -2  -7  -2   67.69    5.30
  -2  -7  -2   71.49    4.90
  -2  -7  -2   68.29    5.50
   2   7   2   66.19    5.20
   2   7   2   77.49    5.40
  -3  -7  -2   32.00    3.20
  -3  -7  -2   33.90    4.00
   3   7   2   31.70    3.70
   3   7   2   32.50    3.90
  -4  -7  -2  131.99    8.90
  -4  -7  -2  127.19    9.50
   4   7   2  138.09    9.50
  -5  -7  -2    5.00    2.90
   5   7   2    4.60    2.50
  -6  -7  -2  176.28   12.50
   6   7   2  151.28   11.80
  -7  -7  -2    0.00    3.10
   7   7   2    2.50    2.70
  -8  -7  -2   54.59    8.50
   8   7   2   44.60    7.00
  -7   8   2   30.50    4.10
  -6   8   2    1.50    1.60
  -5   8   2   47.00    3.90
  -5   8   2   50.39    4.40
  -5   8   2   52.49    5.40
  -4   8   2   46.90    3.20
  -4   8   2   45.10    3.20
  -4   8   2   43.80    4.30
  -3   8   2   78.89    6.00
  -1   8   2   55.99    4.60
  -1   8   2   60.89    3.90
  -1   8   2   67.09    3.90
   0  -8  -2  269.57   16.10
   0  -8  -2  286.57   16.00
   0   8   2  284.17   16.10
   0   8   2  260.57   16.30
   0   8   2  311.17   16.20
  -1  -8  -2  167.08   10.20
  -1  -8  -2  173.38   10.60
  -1  -8  -2  177.68   10.80
   1   8   2  169.08   10.20
   1   8   2  196.88   10.80
   1   8   2  178.58   10.80
  -2  -8  -2  163.98   10.40
  -2  -8  -2  166.08    9.90
   2   8   2  165.38   10.30
   2   8   2  153.88   10.30
  -3  -8  -2   21.10    2.90
  -3  -8  -2   25.60    3.60
   3   8   2   29.10    3.80
  -4  -8  -2   30.90    4.70
  -4  -8  -2   26.50    3.60
   4   8   2   29.80    4.40
  -5  -8  -2   90.89    8.30
   5   8   2  103.89    8.30
  -6  -8  -2    2.50    3.30
   6   8   2    1.30    2.70
  -7  -8  -2   13.40    4.60
   7   8   2   17.70    4.40
  -7   9   2    1.60    1.80
  -6   9   2   41.90    4.00
  -5   9   2   29.10    2.70
  -5   9   2   30.30    4.20
  -4   9   2   49.20    3.20
  -4   9   2   54.89    3.30
  -4   9   2   52.69    5.00
  -3   9   2  176.48   11.50
   1  -9  -2  313.37   19.10
  -1   9   2  355.86   19.40
  -1   9   2  387.06   19.50
  -1   9   2  339.87   20.20
   0  -9  -2    1.50    1.00
   0  -9  -2    0.90    1.00
   0   9   2    0.50    1.00
   0   9   2   -0.30    1.00
   0   9   2   -0.50    1.10
  -1  -9  -2  336.87   19.30
  -1  -9  -2  287.27   19.60
  -1  -9  -2  336.87   18.70
   1   9   2  336.77   18.70
   1   9   2  360.66   19.30
   1   9   2  327.27   19.30
  -2  -9  -2   78.89    5.10
  -2  -9  -2   67.19    5.70
   2   9   2   67.19    5.60
   2   9   2   68.99    5.50
  -3  -9  -2   72.39    5.10
  -3  -9  -2   65.69    5.90
   3   9   2   59.49    5.50
  -4  -9  -2   33.50    4.80
  -4  -9  -2   38.20    4.10
   4   9   2   35.50    4.90
  -5  -9  -2    9.00    3.40
   5   9   2   10.70    3.30
  -6  -9  -2   18.40    4.80
   6   9   2   13.50    3.90
  -7  -9  -2   22.10    5.30
   7   9   2   23.40    4.70
  -6  10   2    2.00    1.30
  -5  10   2   94.29    7.80
  -4  10   2   31.10    4.30
  -3  10   2   61.99    5.50
  -2  10   2    6.10    2.10
   1 -10  -2   20.90    1.70
  -1  10   2   32.90    3.50
  -1  10   2   21.80    2.10
  -1  10   2   28.60    2.30
   0 -10  -2    2.90    1.20
   0 -10  -2    1.50    1.10
   0  10   2    2.20    1.20
   0  10   2    0.50    1.20
   0  10   2    3.40    1.40
  -1 -10  -2   17.20    2.60
   1  10   2   15.80    2.50
   1  10   2   10.60    2.20
   1  10   2   17.20    1.80
  -2 -10  -2   18.60    2.10
  -2 -10  -2   15.30    2.90
   2  10   2   16.50    2.90
   2  10   2   16.40    2.90
  -3 -10  -2  135.99    8.50
  -3 -10  -2  136.29    9.60
   3  10   2  122.99    9.40
  -4 -10  -2    1.20    2.40
  -4 -10  -2    2.50    1.80
   4  10   2   -0.50    2.00
  -5 -10  -2  103.19    9.10
   5  10   2  103.79    8.70
  -6 -10  -2   -3.60    3.00
   6  10   2    2.20    2.80
  -7 -10  -2   63.69    8.40
   7  10   2   70.89    8.40
  -5  11   2   21.70    4.00
  -4  11   2   37.10    4.70
  -3  11   2  215.98   14.00
  -2  11   2   19.60    1.60
  -2  11   2   30.70    3.90
   1 -11  -2  182.48   10.30
   1 -11  -2  171.48   10.30
  -1  11   2  191.68   10.80
  -1  11   2  194.38   11.70
   0 -11  -2    2.60    1.80
   0 -11  -2    3.70    1.30
   0  11   2    4.80    1.60
   0  11   2    3.60    1.40
   0  11   2    3.30    1.50
  -1 -11  -2  205.18   12.40
   1  11   2  190.18   11.30
   1  11   2  206.38   12.50
  -2 -11  -2   24.30    2.20
  -2 -11  -2   28.80    3.90
   2  11   2   21.80    3.40
   2  11   2   29.00    3.70
  -3 -11  -2   24.60    2.90
  -3 -11  -2   29.00    4.40
   3  11   2   25.30    4.10
  -4 -11  -2   15.70    3.90
   4  11   2   15.80    3.40
  -5 -11  -2   -1.50    2.70
   5  11   2    4.30    3.10
  -6 -11  -2   26.70    5.60
   6  11   2   25.20    5.00
  -7 -11  -2   23.30    5.60
   7  11   2   26.80    5.70
  -5  12   2   -1.50    2.30
  -4  12   2   96.19    8.00
  -3  12   2    4.60    2.40
  -3  12   2    2.20    2.20
  -2  12   2  116.59    8.10
  -2  12   2  100.09    6.40
  -2  12   2  114.99    6.30
   1 -12  -2   -1.50    0.60
   1 -12  -2    0.10    0.60
  -1  12   2    1.30    1.00
  -1  12   2    0.30    1.60
  -1  12   2    0.90    1.10
   0 -12  -2  230.48   14.30
   0  12   2  249.58   14.50
   0  12   2  248.38   14.60
  -1 -12  -2    8.50    2.10
   1  12   2    6.20    2.00
   1  12   2    8.40    2.20
  -2 -12  -2  103.19    7.50
   2  12   2   86.39    7.30
  -3 -12  -2   22.50    4.00
   3  12   2   21.10    3.70
  -4 -12  -2   11.40    3.40
   4  12   2    8.90    3.00
  -5 -12  -2   47.20    6.60
   5  12   2   49.99    6.70
  -6 -12  -2   -4.40    2.80
   6  12   2    2.80    2.80
  -5  13   2    8.00    3.50
  -4  13   2   55.79    6.70
  -4  13   2   57.49    6.90
  -3  13   2    8.60    2.80
  -3  13   2    5.30    2.70
  -2  13   2  156.58    9.40
  -2  13   2  164.48    9.30
  -2  13   2  174.28   11.10
  -1  13   2  154.38   10.40
   0 -13  -2    2.20    1.40
   0  13   2    0.70    1.20
   0  13   2   -0.20    1.40
   0  13   2    2.60    1.60
  -1 -13  -2   31.20    3.80
   1  13   2   27.90    3.70
   1  13   2   20.60    3.30
  -2 -13  -2   36.10    4.50
   2  13   2   42.50    5.10
   2  13   2   33.80    4.60
  -3 -13  -2    2.20    2.30
   3  13   2   10.80    3.20
  -4 -13  -2  119.89    9.60
   4  13   2  100.79    9.00
  -5 -13  -2    1.70    3.30
   5  13   2    1.80    2.80
  -6 -13  -2   80.09    9.50
   6  13   2   61.39    7.70
  -6  14   2    4.50    3.90
  -5  14   2   18.50    4.80
  -5  14   2   19.70    4.40
  -4  14   2    8.70    3.30
  -4  14   2   10.20    3.30
  -3  14   2   18.30    4.10
  -3  14   2   26.50    4.30
  -2  14   2  161.68    9.60
  -2  14   2  170.38   11.50
  -1  14   2   10.10    2.50
  -1  14   2   11.40    2.80
   0  14   2   99.49    6.40
   0  14   2   86.89    7.00
  -1 -14  -2   21.20    3.20
   1  14   2   19.00    3.20
  -2 -14  -2   13.10    3.00
   2  14   2   11.40    3.10
  -3 -14  -2   31.60    4.80
   3  14   2   34.50    4.90
  -4 -14  -2    4.50    3.10
   4  14   2    9.80    3.60
  -5 -14  -2   15.70    4.50
   5  14   2   23.50    5.10
  -6 -14  -2    7.40    4.50
   6  14   2    4.70    3.30
  -5  15   2    3.20    3.00
  -5  15   2    5.40    3.60
  -4  15   2    6.70    3.20
  -4  15   2    1.50    2.80
  -3  15   2   87.09    9.30
  -3  15   2   86.89    7.90
  -2  15   2   -0.90    1.90
  -2  15   2   -1.10    0.90
  -1  15   2   78.69    6.50
   0  15   2    0.30    1.80
   1  15   2   16.40    3.40
   2  15   2   64.49    6.90
  -3 -15  -2   66.59    7.40
   3  15   2   79.59    7.40
  -4 -15  -2   42.50    6.40
   4  15   2   60.59    7.00
  -5 -15  -2    2.80    3.60
   5  15   2    5.60    3.20
  -5  16   2   32.30    5.80
  -5  16   2   40.10    6.50
  -4  16   2   27.10    5.30
  -4  16   2   24.70    4.90
  -3  16   2   35.70    5.50
  -3  16   2   39.30    6.20
  -2  16   2    1.80    2.40
  -2  16   2   -0.30    1.20
  -1  16   2   -0.20    1.30
   1  16   2   22.40    3.70
   2  16   2   40.80    5.50
   3  16   2   65.09    7.30
   4  16   2    2.60    2.80
   5  16   2   53.19    8.00
  -4  17   2   -2.80    2.80
  -3  17   2   46.50    7.00
  -1  17   2  105.69    7.50
   1  17   2  116.09    9.20
   2  17   2    5.00    2.70
   3  17   2   20.40    4.50
   4  17   2    3.80    3.20
  -3  18   2    9.40    4.40
  -2  18   2   31.10    6.50
  -1  18   2   -0.50    1.60
   2  18   2   13.00    3.80
   3  18   2   13.50    4.20
  -2  19   2    5.30    4.00
  -1  19   2   20.10    3.30
   0  19   2    1.40    2.30
   2  19   2   34.70    5.60
   0  20   2   64.99    6.90
   0  19  -3   18.40    4.30
   0  19  -3   11.80    5.20
  -1  19  -3    3.10    2.70
   2  18  -3   16.90    4.80
   2  18  -3   29.50    5.90
   1  18  -3    1.60    3.20
   1  18  -3    1.40    3.90
   0  18  -3   55.39    6.80
   0  18  -3   52.09    7.80
  -1  18  -3   -2.40    3.00
  -1  18  -3    0.70    2.40
  -2  18  -3   76.89    9.50
  -2  18  -3   75.99    6.70
  -3  18  -3   -1.20    3.10
   3  17  -3    3.80    3.80
   3  17  -3    2.50    3.30
   2  17  -3    6.20    4.00
   2  17  -3   13.10    4.40
   1  17  -3   30.70    5.20
   1  17  -3   34.30    6.20
   0  17  -3   -2.10    2.90
   0  17  -3    8.40    3.10
  -1  17  -3   51.59    7.50
  -1  17  -3   41.40    5.40
  -2  17  -3   -0.40    2.10
  -2  17  -3    0.50    3.00
  -3  17  -3   71.49    9.50
  -4  17  -3    7.00    4.50
   4  16  -3    4.50    3.00
   4  16  -3    1.80    3.70
   3  16  -3   67.99    8.30
   3  16  -3   74.09    8.40
   2  16  -3    5.60    3.70
   2  16  -3    3.20    3.20
   1  16  -3   53.59    6.50
   1  16  -3   59.59    7.60
   0  16  -3    0.20    2.80
   0  16  -3   -0.50    2.30
  -1  16  -3    2.40    2.40
  -1  16  -3   -0.20    2.90
  -2  16  -3    5.20    2.40
  -2  16  -3   -1.70    3.20
  -3  16  -3   12.00    4.30
  -3  16  -3   14.80    2.50
  -4  16  -3    1.80    3.40
   4  15  -3   14.60    4.20
  -4 -15   3   13.30    4.60
   3  15  -3   51.49    7.00
   2  15  -3    2.50    2.80
   2  15  -3    1.30    2.80
   1  15  -3  157.98   11.50
   1  15  -3  153.28   12.20
   0  15  -3   12.20    3.30
   0  15  -3   26.80    5.10
  -1  15  -3  175.28   11.60
  -1  15  -3  172.68   13.20
  -2  15  -3    2.10    2.90
  -2  15  -3    2.20    2.10
  -3  15  -3   64.49    4.90
  -3  15  -3   70.89    8.30
  -4  15  -3    1.30    3.30
  -5  15  -3   20.70    5.30
  -5 -14   3    6.90    4.20
   4  14  -3    9.50    3.40
  -4 -14   3   12.00    4.70
   3  14  -3   46.80    6.10
  -3 -14   3   48.30    6.60
   2  14  -3   38.70    5.60
   2  14  -3   34.30    5.40
  -2 -14   3   34.50    5.20
   1  14  -3   70.29    7.80
   1  14  -3   56.99    6.40
  -1 -14   3   58.59    6.60
   0  14  -3   40.00    5.00
   0  14  -3   38.80    5.80
  -1  14  -3    4.80    2.30
  -1  14  -3    3.70    2.90
  -2  14  -3   68.89    5.70
  -2  14  -3   72.19    8.20
  -3  14  -3    2.90    3.00
  -3  14  -3    6.90    1.80
  -4  14  -3   37.20    6.50
  -5  14  -3   37.10    6.30
   5  13  -3   -2.20    2.30
  -5 -13   3    1.90    3.80
  -4 -13   3  115.99   10.40
  -3 -13   3    1.80    2.70
  -2 -13   3   23.70    4.40
   1  13  -3   51.19    5.80
   1  13  -3   50.19    6.30
   1  13  -3   47.30    5.70
  -1 -13   3   63.59    6.40
   0  13  -3   19.30    3.40
   0  13  -3   18.70    4.20
   0  13  -3   26.20    3.90
   0 -13   3   19.10    3.50
  -1  13  -3   -1.00    2.30
  -1  13  -3    3.40    2.00
  -1  13  -3    3.10    1.30
  -2  13  -3   12.10    3.60
  -2  13  -3   12.80    2.50
  -3  13  -3   12.10    3.80
  -3  13  -3    8.80    2.00
  -4  13  -3   75.69    8.30
  -4  13  -3   62.99    4.50
  -5  13  -3   -2.80    2.60
  -6  13  -3   48.60    7.20
  -6 -12   3   47.40    7.90
   5  12  -3   13.20    3.30
  -5 -12   3   13.00    4.40
  -4 -12   3    5.30    3.50
  -3 -12   3   -0.20    2.50
  -2 -12   3  129.89    9.90
   1  12  -3    3.70    2.20
   1  12  -3    7.40    2.80
   1  12  -3    9.30    2.70
  -1 -12   3   10.00    2.60
   0  12  -3  246.78   14.50
   0  12  -3  217.28   14.10
   0  12  -3  218.38   15.10
   0 -12   3  229.68   14.40
  -1  12  -3   23.20    3.10
  -1  12  -3   31.30    3.70
  -1  12  -3   22.20    4.20
  -1  12  -3   27.60    2.50
   1 -12   3   29.70    3.50
  -2  12  -3  452.95   26.00
  -2  12  -3  458.75   27.50
  -2  12  -3  448.16   25.70
  -3  12  -3   22.80    2.70
  -3  12  -3   18.30    4.20
  -4  12  -3  154.68    9.40
  -4  12  -3  160.38   12.00
  -5  12  -3    7.90    1.50
  -5  12  -3    5.40    3.20
  -6  12  -3    6.30    3.40
  -6 -11   3   62.39    8.70
   5  11  -3    3.20    2.20
  -5 -11   3    0.90    3.40
  -4 -11   3  156.88   12.10
  -3 -11   3   81.69    8.50
  -2 -11   3   61.39    6.60
   1  11  -3  132.99    9.20
   1  11  -3  134.09    9.40
  -1 -11   3  132.59    9.50
   0  11  -3   44.60    5.60
   0  11  -3   55.79    4.70
   0  11  -3   57.89    5.00
   0 -11   3   55.59    5.00
  -1  11  -3   86.59    6.10
  -1  11  -3   76.39    5.70
  -1  11  -3   73.89    5.20
  -1  11  -3   87.39    7.10
   1 -11   3   84.89    6.00
  -2  11  -3    0.40    1.00
  -2  11  -3    1.60    2.20
  -2  11  -3    0.40    1.60
   2 -11   3    0.40    0.90
   2 -11   3    0.40    0.90
  -3  11  -3  138.79    8.90
  -3  11  -3  164.78   11.30
  -3  11  -3  147.09    9.00
  -4  11  -3   20.70    4.30
  -4  11  -3   20.70    2.30
  -5  11  -3   27.00    5.10
  -5  11  -3   24.40    2.70
  -6  11  -3   12.60    4.00
  -6  11  -3    8.10    2.00
  -6 -10   3   12.70    4.40
   5  10  -3  154.58   12.30
  -5 -10   3  186.68   13.30
   4  10  -3   -1.90    2.30
  -4 -10   3    2.30    2.60
  -4 -10   3    0.50    1.40
   3  10  -3  133.99   10.60
  -3 -10   3  157.48    8.90
  -3 -10   3  158.08   11.20
  -2 -10   3    7.70    2.70
   1  10  -3    7.00    2.10
  -1 -10   3   11.20    2.60
   0  10  -3  121.69    8.00
   0  10  -3  112.69    7.70
   0  10  -3  109.19    8.40
   0 -10   3  111.59    8.00
  -1  10  -3    3.30    1.30
  -1  10  -3    2.10    1.50
  -1  10  -3    2.80    2.10
   1 -10   3    5.10    1.60
  -2  10  -3   46.70    5.30
  -2  10  -3   45.30    4.10
  -2  10  -3   40.60    3.60
   2 -10   3   47.20    3.30
   2 -10   3   49.99    3.30
  -3  10  -3   31.10    4.70
  -3  10  -3   33.50    3.10
  -3  10  -3   31.50    2.90
  -4  10  -3    6.20    1.60
  -4  10  -3    9.10    2.80
  -4  10  -3    6.80    1.60
  -5  10  -3  116.29    7.60
  -5  10  -3  119.69    9.60
  -6  10  -3   -2.00    2.60
  -6  10  -3    0.20    1.50
  -7  10  -3   50.39    5.70
  -7  -9   3   24.90    6.00
  -6  -9   3   -1.40    2.80
   5   9  -3    3.10    2.90
  -5  -9   3    0.70    2.00
  -5  -9   3   -1.70    2.60
   4   9  -3    7.20    2.70
  -4  -9   3    3.90    1.60
  -4  -9   3    5.90    2.80
   3   9  -3   77.09    7.00
  -3  -9   3   85.89    5.60
  -3  -9   3   80.99    7.30
   2   9  -3   -1.80    1.60
  -2  -9   3    0.10    1.70
   1   9  -3  344.17   19.50
  -1  -9   3  311.27   19.50
   0   9  -3   14.40    1.20
   0   9  -3   13.80    2.70
   0   9  -3   13.00    2.30
   0   9  -3   17.90    2.70
   0  -9   3   15.20    2.50
  -1   9  -3  293.97   17.20
  -1   9  -3  301.17   17.10
  -1   9  -3  310.37   18.10
   1  -9   3  285.27   16.80
   1  -9   3  283.17   17.20
  -2   9  -3    8.60    2.00
  -2   9  -3   10.50    1.80
  -2   9  -3   10.90    2.70
   2  -9   3   11.30    1.50
   2  -9   3   11.40    1.40
  -3   9  -3  252.67   14.30
  -3   9  -3  242.28   15.70
  -3   9  -3  241.48   14.40
  -4   9  -3    1.70    2.10
  -4   9  -3    2.80    1.30
  -4   9  -3    3.60    1.40
  -5   9  -3   59.09    6.70
  -5   9  -3   51.99    4.50
  -6   9  -3    2.60    1.90
  -6   9  -3    3.40    3.30
  -7   9  -3    3.30    2.20
  -7  -8   3   21.60    5.20
  -6  -8   3   18.90    4.60
   5   8  -3   88.69    8.10
  -5  -8   3   94.69    8.50
   4   8  -3    0.10    2.00
  -4  -8   3   -1.60    2.10
   3   8  -3  423.16   25.40
  -3  -8   3  446.86   25.70
  -3  -8   3  419.06   24.20
   2   8  -3    0.80    1.50
   2   8  -3    4.60    1.90
  -2  -8   3    0.50    1.70
  -2  -8   3    4.90    1.00
   1   8  -3  150.08    9.40
  -1  -8   3  137.39    9.50
   0   8  -3  135.99    9.10
   0   8  -3  133.19    8.60
   0   8  -3  151.28    8.70
   0   8  -3  129.29    7.60
   0  -8   3  144.19    8.90
   0  -8   3  117.19    8.30
  -1   8  -3   -0.50    0.90
  -1   8  -3    4.60    1.50
  -1   8  -3    1.50    1.70
   1  -8   3    3.10    1.10
   1  -8   3    3.10    1.50
  -2   8  -3   37.20    3.60
  -2   8  -3   46.00    5.00
  -2   8  -3   35.50    3.10
   2  -8   3   34.10    2.70
   2  -8   3   35.30    2.70
  -3   8  -3   19.90    3.60
  -3   8  -3   29.20    3.00
  -3   8  -3   28.30    2.70
   3  -8   3   27.30    2.10
  -4   8  -3   45.70    3.80
  -4   8  -3   49.30    3.80
  -4   8  -3   48.30    5.60
   4  -8   3   42.30    2.80
  -5   8  -3   50.39    4.50
  -5   8  -3   53.39    6.20
  -6   8  -3   18.90    4.10
  -6   8  -3    6.40    2.30
  -7   8  -3   48.90    5.60
  -7  -7   3    3.70    3.60
   6   7  -3   77.89    8.10
  -6  -7   3  115.49    9.60
   5   7  -3    5.30    2.60
  -5  -7   3    1.60    2.60
   4   7  -3  220.68   14.40
  -4  -7   3  218.78   14.70
   3   7  -3    0.90    2.00
  -3  -7   3    1.60    1.20
  -3  -7   3    4.10    2.30
   2   7  -3  240.18   14.50
   2   7  -3  237.98   14.50
  -2  -7   3  232.98   14.60
  -2  -7   3  229.68   13.40
   1   7  -3  122.79    7.80
  -1  -7   3  123.29    8.00
  -1  -7   3  105.49    7.60
   0   7  -3  155.98   10.00
   0   7  -3  149.49    8.80
   0   7  -3  160.68    9.60
   0   7  -3  163.88    9.60
   0  -7   3  140.79    9.30
   0  -7   3  155.18    9.70
  -1   7  -3   52.59    3.90
  -1   7  -3   53.09    4.60
  -1   7  -3   45.30    3.90
   1  -7   3   52.79    4.10
   1  -7   3   51.39    3.70
  -2   7  -3  237.98   13.30
  -2   7  -3  197.78   12.20
  -2   7  -3  193.08   12.20
  -3   7  -3    2.80    1.80
  -3   7  -3    1.90    1.30
  -3   7  -3    0.90    1.10
   3  -7   3    1.30    0.80
   3  -7   3    2.50    0.90
  -4   7  -3  111.69    7.00
  -4   7  -3  124.99    8.50
  -4   7  -3  112.19    7.10
   4  -7   3  101.79    6.40
   4  -7   3   97.99    6.60
  -5   7  -3   16.70    2.60
  -5   7  -3   20.70    3.90
  -5   7  -3   16.50    2.60
  -6   7  -3  108.09    8.50
  -6   7  -3  134.89   10.00
  -7   7  -3    2.90    2.40
  -8   7  -3   42.70    5.70
  -7  -6   3    0.30    3.30
   6   6  -3    5.30    2.80
  -6  -6   3    2.10    2.80
   5   6  -3    5.50    2.70
  -5  -6   3   15.00    3.80
   4   6  -3   28.80    4.20
  -4  -6   3   48.90    5.60
   3   6  -3   10.50    2.50
  -3  -6   3   12.10    2.90
   2   6  -3  442.36   24.40
   2   6  -3  411.76   24.20
  -2  -6   3  404.66   24.40
  -2  -6   3  414.46   23.40
   1   6  -3  102.49    6.80
  -1  -6   3   92.89    5.70
  -1  -6   3  109.29    7.00
  -1  -6   3   98.59    6.70
   0   6  -3  792.32   45.00
   0   6  -3  887.51   45.70
   0   6  -3  820.42   45.60
   0   6  -3  850.71   45.90
   0  -6   3  815.82   45.50
   0  -6   3  761.92   45.60
  -1   6  -3   27.40    2.90
  -1   6  -3   27.80    3.40
  -1   6  -3   27.60    2.90
   1  -6   3   32.10    3.10
  -2   6  -3  421.46   21.00
  -2   6  -3  315.07   21.40
  -2   6  -3  351.56   20.90
   2  -6   3  375.26   20.60
  -3   6  -3   25.30    3.40
  -3   6  -3   22.80    2.50
  -3   6  -3   26.30    2.70
   3  -6   3   20.20    1.90
   3  -6   3   22.00    2.30
  -4   6  -3  240.58   14.20
  -4   6  -3  241.18   15.30
  -4   6  -3  243.68   14.30
   4  -6   3  238.38   14.00
  -5   6  -3   11.80    3.10
  -5   6  -3    7.50    2.10
  -5   6  -3    8.40    2.20
  -6   6  -3   43.20    5.60
  -6   6  -3   42.20    4.80
  -7   6  -3   -0.60    2.20
  -8   6  -3   19.30    4.30
  -7  -5   3   16.50    4.40
   6   5  -3  191.68   13.60
  -6  -5   3  192.58   14.00
   5   5  -3   11.80    3.10
   5   5  -3   11.60    1.70
  -5  -5   3   11.20    3.30
   4   5  -3  239.48   14.60
  -4  -5   3  217.98   14.70
   3   5  -3    6.10    2.00
  -3  -5   3    7.20    2.30
   2   5  -3  252.17   14.90
   2   5  -3  269.37   15.00
  -2  -5   3  239.38   15.00
  -2  -5   3  247.98   14.90
  -2  -5   3  228.58   14.10
   1   5  -3  124.99    7.90
   1   5  -3  128.79    7.80
  -1  -5   3  111.69    7.70
  -1  -5   3  116.29    7.20
  -1  -5   3  127.89    8.00
   0   5  -3   75.29    5.30
   0   5  -3   80.59    5.20
   0   5  -3   70.69    4.60
   0   5  -3   73.59    5.10
   0  -5   3   75.99    5.40
   0  -5   3   71.69    5.10
  -1   5  -3   28.90    2.90
  -1   5  -3   27.80    2.90
  -1   5  -3   26.70    3.20
   1  -5   3   31.30    2.60
   1  -5   3   29.10    2.90
  -2   5  -3  431.36   23.70
  -2   5  -3  426.96   23.00
  -2   5  -3  398.36   23.00
   2  -5   3  404.76   22.80
   2  -5   3  384.96   22.90
   2  -5   3  407.16   23.50
  -3   5  -3  123.89    7.10
  -3   5  -3  111.99    7.00
  -3   5  -3  119.89    7.90
   3  -5   3  111.29    7.50
   3  -5   3   90.09    6.60
   3  -5   3  115.99    7.00
  -4   5  -3   98.39    7.50
  -4   5  -3  107.39    6.80
  -4   5  -3   94.09    6.70
   4  -5   3   96.79    6.40
   4  -5   3  106.19    6.50
   4  -5   3   91.79    7.00
  -5   5  -3   -2.40    1.60
  -5   5  -3   -0.30    1.50
  -5   5  -3   -1.80    1.50
   5  -5   3   -1.50    1.30
  -6   5  -3   96.59    8.00
  -6   5  -3  103.39    7.90
  -7   5  -3    4.80    2.70
  -8   5  -3   46.00    6.20
  -7  -4   3   63.29    7.70
   6   4  -3   17.00    3.70
  -6  -4   3   26.70    4.90
   5   4  -3  224.08   13.10
   5   4  -3  244.38   15.10
  -5  -4   3  230.18   15.20
   4   4  -3    6.50    2.20
  -4  -4   3    4.80    2.20
   3   4  -3  299.97   18.00
  -3  -4   3  292.17   18.10
  -3  -4   3  309.67   18.10
   2   4  -3    0.80    1.50
   2   4  -3    1.40    1.30
  -2  -4   3   -0.80    1.30
  -2  -4   3    1.00    1.40
  -2  -4   3    0.10    1.00
   1   4  -3   65.39    4.50
   1   4  -3   61.89    4.60
  -1  -4   3   64.49    4.70
  -1  -4   3   59.79    4.50
  -1  -4   3   59.89    4.10
   0   4  -3  419.56   22.60
   0   4  -3  415.46   22.50
   0   4  -3  405.16   22.60
   0   4  -3  368.66   22.10
   0  -4   3  371.06   22.00
   0  -4   3  416.16   22.70
  -1   4  -3   53.99    4.10
  -1   4  -3   52.29    3.80
  -1   4  -3   42.50    3.70
   1  -4   3   47.80    3.70
   1  -4   3   49.60    3.60
   1  -4   3   57.19    4.20
  -2   4  -3   73.69    5.40
  -2   4  -3   82.09    5.00
  -2   4  -3   69.09    4.90
   2  -4   3   78.49    4.70
   2  -4   3   73.69    4.90
   2  -4   3   62.39    5.20
  -3   4  -3  183.28   11.90
  -3   4  -3  195.08   11.30
  -3   4  -3  202.38   11.30
   3  -4   3  175.08   11.60
   3  -4   3  183.08   11.10
   3  -4   3  196.38   11.10
  -4   4  -3   29.60    3.30
  -4   4  -3   27.00    3.20
  -4   4  -3   25.80    3.80
   4  -4   3   24.00    3.20
   4  -4   3   33.10    3.40
   4  -4   3   31.50    2.90
  -5   4  -3   93.79    6.40
  -5   4  -3   89.99    6.80
  -5   4  -3   92.39    6.50
   5  -4   3   83.69    6.20
   5  -4   3   62.29    5.90
  -6   4  -3   31.20    4.40
  -7   4  -3  100.59    8.60
  -8   4  -3    6.20    3.30
  -8  -3   3    3.30    3.50
  -7  -3   3  130.09   11.20
  -6  -3   3   42.10    6.10
   5   3  -3    3.20    2.10
   4   3  -3   65.09    4.20
   4   3  -3   74.59    5.80
  -4  -3   3   64.69    5.90
   3   3  -3  408.76   22.10
  -3  -3   3  354.16   22.00
  -3  -3   3  369.76   22.20
   2   3  -3  110.49    6.60
   2   3  -3  111.09    7.20
   2   3  -3  106.39    7.10
  -2  -3   3  105.39    7.20
  -2  -3   3  105.89    7.40
   1   3  -3  219.58   13.00
   1   3  -3  231.38   13.10
   1   3  -3  227.98   12.80
  -1  -3   3  224.88   13.10
  -1  -3   3  221.58   13.00
  -1  -3   3  206.08   12.70
   0   3  -3   39.30    3.20
   0   3  -3   33.50    2.80
   0   3  -3   41.00    3.20
   0   3  -3   39.80    3.10
   0  -3   3   43.70    3.50
   0  -3   3   37.80    2.90
   0  -3   3   38.10    3.10
   0  -3   3   41.30    3.20
  -1   3  -3 1227.68   64.39
  -1   3  -3 1251.07   64.19
  -1   3  -3 1041.30   64.09
   1  -3   3 1245.98   64.39
   1  -3   3 1026.60   63.99
   1  -3   3 1214.88   64.09
  -2   3  -3   23.30    2.90
  -2   3  -3   23.50    2.50
  -2   3  -3   23.00    2.40
   2  -3   3   23.90    2.20
   2  -3   3   23.50    2.40
   2  -3   3   22.50    2.80
  -3   3  -3  327.37   19.50
  -3   3  -3  321.87   18.90
  -3   3  -3  335.97   18.90
   3  -3   3  347.67   18.80
   3  -3   3  346.27   18.80
   3  -3   3  297.47   19.20
  -4   3  -3    2.00    1.50
  -4   3  -3    1.30    1.30
  -4   3  -3    4.70    1.90
   4  -3   3    3.30    1.40
   4  -3   3    2.50    1.50
  -5   3  -3   79.19    6.30
  -5   3  -3   83.99    6.20
  -5   3  -3   81.59    6.50
   5  -3   3   80.29    6.00
   5  -3   3   76.39    5.90
  -6   3  -3    0.10    1.70
  -6   3  -3   -0.70    1.90
   6  -3   3    1.20    1.70
  -7   3  -3    8.00    2.80
  -8   3  -3   -2.10    2.90
  -8  -2   3   37.70    6.20
  -7  -2   3  152.78   12.10
  -6  -2   3   54.99    6.50
   5   2  -3  330.57   20.00
  -5  -2   3  325.47   20.30
   4   2  -3   30.30    1.90
   4   2  -3   25.20    3.50
  -4  -2   3   23.70    3.60
  -4  -2   3   33.90    4.00
   3   2  -3  114.29    6.90
   3   2  -3   91.59    5.60
   3   2  -3   94.09    6.60
  -3  -2   3   87.59    6.80
  -3  -2   3   92.19    6.70
   2   2  -3   53.79    3.70
   2   2  -3   61.69    4.40
  -2  -2   3   53.69    4.60
  -2  -2   3   62.59    4.40
   1   2  -3    0.00    1.30
   1   2  -3    0.30    0.90
   1   2  -3   -0.80    1.00
  -1  -2   3    0.50    1.30
  -1  -2   3    1.30    1.40
  -1  -2   3   -0.20    1.00
   0   2  -3  225.98   13.00
   0   2  -3  241.58   13.10
   0   2  -3  223.78   13.00
   0   2  -3  201.78   12.80
   0  -2   3  217.28   13.00
   0  -2   3  230.88   13.00
   0  -2   3  223.58   12.90
   0  -2   3  238.08   13.20
  -1   2  -3    0.50    1.00
  -1   2  -3   -0.30    1.20
  -1   2  -3    2.50    1.40
  -1   2  -3   -0.10    1.10
   1  -2   3   -0.50    1.10
   1  -2   3    3.40    1.40
   1  -2   3    0.10    1.00
  -2   2  -3   44.80    3.50
  -2   2  -3   40.30    3.80
  -2   2  -3   52.59    3.60
   2  -2   3   43.10    3.70
   2  -2   3   51.99    3.50
   2  -2   3   43.90    3.40
  -3   2  -3  264.07   16.20
  -3   2  -3  266.07   15.70
  -3   2  -3  284.17   15.70
   3  -2   3  240.38   15.90
   3  -2   3  282.37   15.60
   3  -2   3  285.17   15.60
  -4   2  -3    5.00    1.80
  -4   2  -3    7.90    2.00
  -4   2  -3    2.40    1.60
   4  -2   3    4.80    1.70
   4  -2   3    3.80    1.80
  -5   2  -3  361.26   20.20
  -5   2  -3  348.47   20.10
  -5   2  -3  329.57   20.20
   5  -2   3  334.97   19.90
   5  -2   3  320.97   19.90
  -6   2  -3   -1.70    1.90
  -6   2  -3   -2.50    1.70
   6  -2   3   -3.20    1.50
  -7   2  -3  100.79    8.70
  -8   2  -3    6.60    3.80
  -8  -1   3  115.89   11.10
  -7  -1   3    5.90    3.30
  -6  -1   3  134.39   10.30
  -5  -1   3    7.50    2.50
   4   1  -3   28.90    3.60
  -4  -1   3   21.10    3.30
  -4  -1   3   28.00    3.90
   3   1  -3   63.79    4.80
   3   1  -3   62.59    4.80
  -3  -1   3   54.39    4.80
  -3  -1   3   65.69    5.00
   2   1  -3  196.98   11.70
   2   1  -3  220.98   12.50
  -2  -1   3  206.68   12.50
  -2  -1   3  219.58   12.50
   1   1  -3  273.37   16.60
   1   1  -3  291.57   16.40
   1   1  -3  294.07   16.70
  -1  -1   3  292.37   16.70
  -1  -1   3  303.57   16.70
  -1  -1   3  298.57   16.30
   0   1  -3  106.39    6.60
   0   1  -3  101.29    6.60
   0   1  -3  109.99    6.70
   0   1  -3  115.59    6.80
   0  -1   3  107.39    6.60
   0  -1   3  108.79    6.70
   0  -1   3  111.69    6.70
   0  -1   3  105.19    6.70
  -1   1  -3  336.37   19.20
  -1   1  -3  367.56   19.30
  -1   1  -3  367.36   19.40
  -1   1  -3  305.17   19.50
   1  -1   3  362.56   19.30
   1  -1   3  319.97   19.50
   1  -1   3  338.97   19.20
  -2   1  -3   28.90    3.10
  -2   1  -3   25.90    2.60
  -2   1  -3   29.40    2.70
   2  -1   3   27.90    3.00
   2  -1   3   25.80    2.40
   2  -1   3   25.80    2.60
  -3   1  -3  364.56   20.50
  -3   1  -3  340.97   20.50
  -3   1  -3  342.07   20.70
   3  -1   3  383.76   20.50
   3  -1   3  351.56   20.30
   3  -1   3  366.76   20.80
  -4   1  -3   92.29    6.40
  -4   1  -3   86.99    6.60
  -4   1  -3   88.39    6.50
   4  -1   3   97.49    6.50
   4  -1   3   91.19    6.50
   5  -1   3    8.50    2.20
   5  -1   3    3.80    1.80
  -6   1  -3  111.29    8.50
  -6   1  -3  111.39    8.50
   6  -1   3   98.09    8.00
  -8   1  -3   36.60    6.20
  -8   0   3  152.78   13.10
  -7   0   3    8.70    3.70
  -5   0   3   15.20    3.10
  -5   0   3   16.00    3.00
  -4   0   3    4.40    2.00
  -4   0   3    3.20    1.70
   3   0  -3   14.00    2.20
  -3   0   3    9.10    2.00
  -3   0   3   13.30    2.30
   2   0  -3  369.06   21.00
   2   0  -3  374.46   21.00
  -2   0   3  370.46   21.00
  -2   0   3  365.96   21.10
   1   0  -3   59.39    3.90
   1   0  -3   51.59    3.60
   1   0  -3   56.39    4.00
  -1   0   3   53.59    3.60
  -1   0   3   60.79    4.10
  -1   0   3   59.09    4.20
  -1   0   3   54.59    3.90
   0   0  -3 1571.34   90.09
   0   0  -3 1647.24   90.09
   0   0  -3 1803.22   90.29
   0   0  -3 1624.54   90.09
   0   0   3 1650.83   90.19
   0   0   3 1621.94   90.09
   0   0   3 1645.84   90.19
   0   0   3 1616.74   90.09
  -1   0  -3   14.60    1.80
  -1   0  -3   13.20    2.10
  -1   0  -3   19.60    2.20
  -1   0  -3   15.80    1.90
   1   0   3   18.00    2.10
   1   0   3   15.60    1.80
   1   0   3   18.20    2.20
   1   0   3   15.80    1.90
  -2   0  -3   41.30    3.40
  -2   0  -3   39.90    3.30
  -2   0  -3   35.00    3.20
   2   0   3   49.00    3.60
   2   0   3   39.60    3.30
   2   0   3   38.40    3.20
  -3   0  -3    8.80    1.80
  -3   0  -3   10.50    2.00
  -3   0  -3   13.00    2.10
   3   0   3    7.30    1.50
   3   0   3    8.50    2.00
   3   0   3   10.20    1.90
  -4   0  -3  123.39    8.60
  -4   0  -3  125.69    8.70
   4   0   3  137.59    8.80
   4   0   3  137.09    8.70
  -5   0  -3    4.00    2.20
  -5   0  -3    3.40    2.00
   5   0   3    3.40    1.90
   5   0   3    3.50    1.70
   6   0   3   -3.40    1.80
  -7   0  -3   14.00    4.00
   7   0   3    7.10    3.90
  -8   0  -3   35.10    5.80
  -8   1   3  124.69   11.00
  -7   1   3    8.50    3.30
  -6   1   3  336.77   21.00
  -5   1   3   15.20    3.00
  -4   1   3   27.80    3.50
  -4   1   3   32.10    3.80
   3  -1  -3    4.90    1.40
  -3   1   3    5.80    1.70
  -3   1   3    4.40    1.60
   2  -1  -3  115.69    7.20
   2  -1  -3  123.49    7.30
  -2   1   3  114.69    7.30
  -2   1   3  114.79    7.30
   1  -1  -3    9.80    1.50
   1  -1  -3   10.10    1.40
  -1   1   3    8.50    1.50
  -1   1   3    9.20    1.10
  -1   1   3   10.00    1.80
  -1   1   3   10.00    1.50
   0  -1  -3   34.70    2.80
   0  -1  -3   32.30    2.70
   0  -1  -3   32.60    2.80
   0   1   3   33.70    2.70
   0   1   3   33.10    2.70
   0   1   3   28.00    2.90
   0   1   3   35.90    2.50
  -1  -1  -3   65.79    4.30
  -1  -1  -3   63.09    4.30
  -1  -1  -3   60.09    4.40
   1   1   3   75.49    4.60
   1   1   3   65.69    4.30
   1   1   3   59.09    4.30
   1   1   3   68.69    4.50
  -2  -1  -3  130.79    7.80
  -2  -1  -3  127.79    7.80
   2   1   3  123.89    7.70
   2   1   3  117.19    7.80
   2   1   3  125.59    7.70
  -3  -1  -3   91.69    6.60
  -3  -1  -3  105.59    6.70
   3   1   3  100.59    6.60
   3   1   3   98.29    6.70
   3   1   3   99.79    6.50
  -4  -1  -3  268.57   16.30
  -4  -1  -3  253.17   16.30
   4   1   3  273.67   16.30
   4   1   3  288.07   16.30
  -5  -1  -3    1.20    1.90
  -5  -1  -3   -0.50    1.90
   5   1   3    0.60    1.60
   5   1   3   -1.20    1.60
  -6  -1  -3  300.57   18.80
   6   1   3  295.67   18.50
  -7  -1  -3    1.00    2.80
   7   1   3    5.40    2.70
  -8  -1  -3  104.39   10.10
  -8   2   3   58.89    7.80
  -7   2   3   56.69    6.90
   6  -2  -3   15.80    2.90
  -6   2   3   14.60    3.10
  -5   2   3  180.48   11.80
  -4   2   3  156.98    9.80
  -4   2   3  148.59    9.80
   3  -2  -3  147.49    8.60
   3  -2  -3  137.29    8.50
  -3   2   3  129.89    8.70
  -3   2   3  140.89    8.70
   2  -2  -3  126.79    7.50
   2  -2  -3  122.69    7.40
  -2   2   3  120.99    7.50
  -2   2   3  121.89    7.50
   1  -2  -3  131.79    7.90
   1  -2  -3  135.19    8.00
  -1   2   3  133.29    8.00
  -1   2   3  133.49    8.00
  -1   2   3  145.49    8.40
   0  -2  -3 1681.83   92.69
   0  -2  -3 1789.52   92.79
   0  -2  -3 1827.42   93.09
   0   2   3 1651.13   92.79
   0   2   3 1715.63   92.69
   0   2   3 1533.75   92.99
  -1  -2  -3   25.90    2.60
  -1  -2  -3   26.50    2.40
  -1  -2  -3   25.90    2.40
   1   2   3   21.90    2.20
   1   2   3   23.00    2.40
   1   2   3   24.30    2.20
  -2  -2  -3  865.01   46.60
  -2  -2  -3  841.82   46.50
  -2  -2  -3  848.82   46.70
   2   2   3  874.91   46.50
   2   2   3  748.13   46.50
   2   2   3  868.01   46.50
  -3  -2  -3  208.18   13.80
  -3  -2  -3  224.68   13.70
   3   2   3  237.08   13.70
   3   2   3  247.08   13.90
   3   2   3  240.88   13.80
  -4  -2  -3    6.70    2.10
  -4  -2  -3    4.50    2.00
   4   2   3    0.60    1.60
   4   2   3    6.70    2.00
  -5  -2  -3  138.89    9.90
   5   2   3  147.29    9.50
   5   2   3  136.29    9.60
   6   2   3    3.60    2.40
  -7  -2  -3   68.29    7.80
   7   2   3   65.69    7.30
  -8  -2  -3   25.20    5.50
  -8   3   3   10.30    3.80
  -7   3   3   22.50    4.20
  -6   3   3   90.09    7.50
   5  -3  -3    9.20    2.00
  -5   3   3    8.00    2.20
   4  -3  -3   51.19    4.30
  -4   3   3   55.49    4.60
  -4   3   3   61.09    3.60
  -4   3   3   56.19    4.70
   3  -3  -3  100.09    6.10
   3  -3  -3   93.39    6.10
  -3   3   3  100.49    6.30
  -3   3   3   90.59    6.30
  -3   3   3   94.69    5.80
   2  -3  -3   50.69    3.80
   2  -3  -3   59.89    3.70
  -2   3   3   56.49    3.90
  -2   3   3   56.19    3.80
   1  -3  -3   41.60    2.90
  -1   3   3   41.50    3.10
  -1   3   3   44.70    3.10
  -1   3   3   48.20    3.70
   0  -3  -3   82.69    5.60
   0  -3  -3   87.69    5.20
   0  -3  -3   84.49    5.30
   0   3   3   84.29    5.70
   0   3   3   92.59    5.30
   0   3   3   85.19    5.30
  -1  -3  -3  878.61   50.49
  -1  -3  -3  937.51   50.59
  -1  -3  -3  965.10   50.79
   1   3   3  898.21   50.49
   1   3   3  939.41   50.79
   1   3   3  895.61   50.49
  -2  -3  -3   52.29    4.00
  -2  -3  -3   52.49    4.00
  -2  -3  -3   51.39    4.20
   2   3   3   49.60    4.10
   2   3   3   57.79    4.00
  -3  -3  -3  288.47   17.50
  -3  -3  -3  283.87   17.60
   3   3   3  302.37   17.40
   3   3   3  319.97   17.60
  -4  -3  -3   39.60    4.60
  -4  -3  -3   46.50    4.30
   4   3   3   46.40    4.00
   4   3   3   46.70    4.40
  -5  -3  -3   86.69    6.80
   5   3   3   72.39    6.40
   5   3   3   70.09    5.80
  -6  -3  -3   22.20    4.30
   6   3   3    7.00    2.80
  -7  -3  -3   20.30    4.30
   7   3   3    0.60    2.60
  -8  -3  -3   14.30    4.90
  -8   4   3    1.60    2.80
  -7   4   3  148.09   11.10
  -6   4   3    5.30    2.30
   5  -4  -3  256.27   16.60
  -5   4   3  287.87   17.10
  -5   4   3  281.57   17.00
  -5   4   3  298.67   15.90
   4  -4  -3   -0.50    1.00
  -4   4   3    1.20    1.30
  -4   4   3    1.20    1.00
  -4   4   3    0.60    1.20
   3  -4  -3  229.48   13.30
  -3   4   3  229.98   13.60
  -3   4   3  235.48   13.40
  -3   4   3  239.28   13.60
   2  -4  -3    1.40    0.80
   2  -4  -3    0.40    0.60
  -2   4   3    1.80    0.80
   1  -4  -3  116.99    7.00
   1  -4  -3  119.59    7.00
  -1   4   3  125.19    7.20
  -1   4   3  122.19    7.20
  -1   4   3  139.09    8.00
   0  -4  -3  127.89    7.70
   0  -4  -3  127.49    7.20
   0  -4  -3  123.69    7.30
   0   4   3  119.39    7.20
   0   4   3  113.49    7.70
   0   4   3  124.09    7.20
  -1  -4  -3  161.78   10.00
  -1  -4  -3  177.18   10.10
  -1  -4  -3  170.98   10.30
   1   4   3  174.98   10.10
   1   4   3  165.28   10.20
   1   4   3  175.68   10.10
  -2  -4  -3    7.90    1.80
  -2  -4  -3   11.80    1.90
  -2  -4  -3   12.90    2.10
   2   4   3   14.50    2.10
   2   4   3   12.10    1.90
  -3  -4  -3  231.98   14.00
  -3  -4  -3  223.68   14.10
   3   4   3  238.68   14.00
   3   4   3  234.28   13.90
  -4  -4  -3    0.30    1.70
   4   4   3   -0.30    1.00
   4   4   3    0.00    1.50
  -5  -4  -3  240.38   15.30
   5   4   3  228.58   14.50
   5   4   3  242.78   15.10
  -6  -4  -3   -0.30    2.40
   6   4   3   -1.90    2.00
  -7  -4  -3  106.59    9.70
   7   4   3   97.99    8.90
  -8  -4  -3    2.10    3.60
  -8   5   3   33.30    5.20
  -7   5   3   42.00    5.30
  -6   5   3   57.79    5.70
   5  -5  -3    1.40    1.30
  -5   5   3    0.40    1.40
  -5   5   3   -1.10    1.10
  -5   5   3    1.20    1.50
   4  -5  -3   37.90    3.10
  -4   5   3   40.20    3.40
  -4   5   3   36.70    3.50
  -4   5   3   43.40    3.60
   3  -5  -3  102.69    6.40
   3  -5  -3  108.09    6.20
  -3   5   3  108.99    6.60
  -3   5   3  103.19    6.50
   2  -5  -3  185.98   11.00
   2  -5  -3  208.38   11.00
  -2   5   3  205.88   11.40
   1  -5  -3  472.15   26.90
   1  -5  -3  520.15   26.90
  -1   5   3  474.15   27.00
  -1   5   3  476.65   27.00
  -1   5   3  518.65   27.90
   0  -5  -3   11.90    1.40
   0  -5  -3   14.80    1.60
   0  -5  -3   12.90    1.80
   0   5   3   14.20    2.10
   0   5   3   14.10    1.50
   0   5   3   14.40    1.60
  -1  -5  -3  331.27   19.00
  -1  -5  -3  314.57   19.10
  -1  -5  -3  323.27   18.90
   1   5   3  348.67   19.00
   1   5   3  342.27   19.10
   1   5   3  347.77   19.00
  -2  -5  -3   14.50    2.10
  -2  -5  -3   10.70    2.20
  -2  -5  -3   12.50    2.10
   2   5   3   11.70    2.10
   2   5   3   13.40    2.10
  -3  -5  -3  235.78   15.30
  -3  -5  -3  246.98   15.20
  -3  -5  -3  250.97   15.30
   3   5   3  263.67   15.30
   3   5   3  275.37   15.30
  -4  -5  -3  103.89    7.70
   4   5   3   96.99    7.30
  -5  -5  -3   16.10    3.40
   5   5   3   15.10    2.60
   5   5   3   16.00    3.30
  -6  -5  -3   60.39    7.20
   6   5   3   55.89    6.30
   7   5   3   11.00    3.40
  -8  -5  -3   28.20    5.90
   8   5   3   29.10    6.20
  -7   6   3   38.70    5.20
  -6   6   3    2.90    1.90
   5  -6  -3   80.19    6.30
  -5   6   3   80.99    6.10
  -5   6   3   89.79    6.20
  -5   6   3   84.49    6.20
   4  -6  -3   34.80    2.60
   4  -6  -3   32.40    2.70
  -4   6   3   31.50    3.10
  -4   6   3   37.80    3.10
  -4   6   3   34.80    3.60
  -3   6   3    9.80    1.40
  -3   6   3    9.20    1.30
  -2   6   3  434.76   24.00
   1  -6  -3   46.60    2.70
  -1   6   3   48.60    4.00
  -1   6   3   45.60    3.00
  -1   6   3   50.79    3.10
   0  -6  -3  283.57   17.40
   0  -6  -3  317.67   17.20
   0  -6  -3  298.07   17.10
   0   6   3  312.27   17.20
   0   6   3  303.17   17.70
   0   6   3  311.87   17.20
  -1  -6  -3    7.40    1.50
  -1  -6  -3    5.70    1.60
  -1  -6  -3    3.20    1.30
   1   6   3    5.80    1.50
   1   6   3    4.50    1.30
   1   6   3    6.20    1.40
  -2  -6  -3  288.17   16.30
  -2  -6  -3  279.27   16.50
  -2  -6  -3  258.67   16.30
   2   6   3  284.57   16.40
   2   6   3  282.37   16.30
  -3  -6  -3    0.90    1.40
  -3  -6  -3    5.00    1.90
   3   6   3    1.20    1.40
   3   6   3    3.20    1.60
  -4  -6  -3   20.10    3.30
  -4  -6  -3   15.10    2.80
   4   6   3   21.40    3.40
  -5  -6  -3   72.39    7.40
   5   6   3   60.09    6.10
  -6  -6  -3    8.80    3.50
   6   6   3    7.50    3.00
  -7  -6  -3    6.40    3.80
   7   6   3   13.20    3.80
  -8  -6  -3    8.80    4.30
   8   6   3   17.10    4.60
  -7   7   3    1.50    2.10
  -6   7   3  128.19    8.90
  -5   7   3    0.40    1.30
  -5   7   3    0.10    1.50
  -5   7   3    1.00    1.30
  -4   7   3  268.57   15.60
  -4   7   3  261.67   14.90
  -4   7   3  247.28   14.80
  -3   7   3   90.79    5.40
  -3   7   3   87.69    5.30
  -2   7   3   40.00    3.80
  -2   7   3   39.10    2.40
  -1   7   3  123.99    6.90
  -1   7   3  122.69    7.90
  -1   7   3  112.99    6.90
   0  -7  -3   42.00    3.20
   0  -7  -3   42.00    3.10
   0  -7  -3   40.60    3.30
   0   7   3   36.20    3.50
   0   7   3   43.20    3.20
   0   7   3   46.10    3.20
  -1  -7  -3    3.20    1.30
  -1  -7  -3    4.60    1.40
  -1  -7  -3    3.80    1.30
   1   7   3    3.50    1.30
   1   7   3    2.50    1.20
   1   7   3    3.90    1.30
  -2  -7  -3  103.29    7.20
  -2  -7  -3  110.49    7.20
  -2  -7  -3  113.39    7.50
   2   7   3  104.89    7.30
   2   7   3  113.99    7.40
  -3  -7  -3   40.30    4.60
  -3  -7  -3   40.40    3.70
   3   7   3   41.20    4.40
   3   7   3   42.70    4.50
  -4  -7  -3  297.57   17.40
  -4  -7  -3  277.87   17.70
   4   7   3  278.67   17.60
  -5  -7  -3    0.90    2.30
   5   7   3    0.30    2.10
  -6  -7  -3  162.58   12.00
   6   7   3  152.08   11.50
  -7  -7  -3    5.30    3.50
   7   7   3    4.50    3.00
  -8  -7  -3   65.49    9.20
   8   7   3   64.09    8.10
  -7   8   3   27.10    4.00
  -6   8   3    3.20    1.80
  -5   8   3   51.39    4.10
  -5   8   3   51.69    4.90
  -4   8   3   47.30    3.50
  -4   8   3   46.50    4.50
  -4   8   3   52.19    3.50
  -3   8   3   52.69    3.20
  -3   8   3   52.59    3.30
  -2   8   3  198.78   12.50
  -1   8   3  273.67   16.30
  -1   8   3  281.87   15.30
  -1   8   3  263.37   15.30
   0  -8  -3  210.58   12.50
   0  -8  -3  211.68   12.50
   0   8   3  213.88   12.60
   0   8   3  235.28   12.60
   0   8   3  215.28   13.00
  -1  -8  -3   51.99    4.10
  -1  -8  -3   57.39    4.30
  -1  -8  -3   50.99    4.00
   1   8   3   51.59    4.10
   1   8   3   54.49    3.90
   1   8   3   53.29    4.20
  -2  -8  -3  108.79    7.40
  -2  -8  -3  116.49    7.70
   2   8   3  109.79    7.70
   2   8   3  117.69    7.70
  -3  -8  -3  234.18   14.90
  -3  -8  -3  254.47   14.50
   3   8   3  225.78   14.70
  -4  -8  -3   21.60    3.80
  -4  -8  -3   17.00    3.00
   4   8   3   15.10    3.40
  -5  -8  -3   19.40    4.10
   5   8   3   25.60    4.20
  -6  -8  -3    0.60    2.70
   6   8   3   -0.40    2.50
  -7  -8  -3   21.80    5.10
   7   8   3   22.70    4.80
  -7   9   3    0.80    1.90
  -6   9   3   51.29    4.50
  -5   9   3   15.00    3.00
  -5   9   3   14.90    2.00
  -4   9   3   49.60    3.30
  -4   9   3   54.29    3.40
  -4   9   3   50.49    4.90
  -2   9   3   36.80    4.30
  -1   9   3  129.89    8.70
  -1   9   3  127.69    7.70
  -1   9   3  137.19    7.80
   0  -9  -3   15.30    1.90
   0  -9  -3   19.50    2.10
   0   9   3   16.80    2.10
   0   9   3   12.20    2.30
   0   9   3   13.60    2.00
  -1  -9  -3  182.78   11.40
  -1  -9  -3  186.48   11.40
  -1  -9  -3  182.58   11.10
   1   9   3  190.98   11.10
   1   9   3  182.78   11.40
   1   9   3  194.98   11.40
  -2  -9  -3   11.70    2.50
  -2  -9  -3   12.00    2.10
   2   9   3    9.10    2.10
   2   9   3   10.50    2.30
  -3  -9  -3   24.80    3.10
  -3  -9  -3   28.50    4.10
   3   9   3   23.40    3.50
  -4  -9  -3   61.99    6.60
  -4  -9  -3   54.79    5.00
   4   9   3   48.10    5.60
  -5  -9  -3    5.60    2.90
   5   9   3    4.00    2.50
  -6  -9  -3   76.09    8.60
   6   9   3   71.69    8.10
  -7  -9  -3   -2.30    2.90
   7   9   3    1.00    2.70
  -6  10   3   16.80    2.30
  -5  10   3  170.48   11.80
  -5  10   3  174.28   10.10
  -4  10   3   11.80    2.80
  -3  10   3  163.98   11.30
  -2  10   3   24.10    3.60
  -1  10   3   21.30    2.10
  -1  10   3   21.90    2.10
  -1  10   3   19.20    3.10
   0 -10  -3   47.80    3.60
   0 -10  -3   44.40    3.50
   0  10   3   49.50    3.70
   0  10   3   46.10    4.10
   0  10   3   46.50    3.80
  -1 -10  -3   78.69    5.50
  -1 -10  -3   81.59    6.00
   1  10   3   87.59    5.60
   1  10   3   88.59    6.00
   1  10   3   86.99    6.10
  -2 -10  -3   10.30    2.40
  -2 -10  -3   13.40    2.10
   2  10   3   10.30    2.30
   2  10   3   11.40    2.50
  -3 -10  -3  199.48   11.70
  -3 -10  -3  194.78   12.50
   3  10   3  163.88   12.10
  -4 -10  -3    7.80    2.20
  -4 -10  -3   12.50    3.30
   4  10   3    5.60    2.50
  -5 -10  -3  221.88   15.00
   5  10   3  208.38   14.50
  -6 -10  -3   -2.90    3.00
   6  10   3    0.50    2.50
  -7 -10  -3   62.39    8.60
   7  10   3   79.19    8.70
  -5  11   3   47.70    5.60
  -4  11   3   13.80    3.10
  -3  11   3   51.39    5.90
  -2  11   3    3.30    2.00
  -1  11   3  214.58   13.60
  -1  11   3  208.68   12.60
  -1  11   3  227.88   12.60
   0 -11  -3   14.60    2.10
   0 -11  -3   19.40    2.90
   0  11   3   18.00    2.40
   0  11   3   19.20    2.60
   0  11   3   21.00    2.90
  -1 -11  -3   90.79    6.70
   1  11   3   94.79    6.80
   1  11   3   93.99    6.70
   1  11   3   96.19    6.10
  -2 -11  -3    6.40    1.50
  -2 -11  -3    2.70    2.00
   2  11   3    5.40    2.00
   2  11   3    5.00    2.20
  -3 -11  -3   52.69    4.50
  -3 -11  -3   56.69    6.00
   3  11   3   51.09    5.70
  -4 -11  -3   40.70    5.50
   4  11   3   47.90    5.80
  -5 -11  -3    5.00    3.30
   5  11   3    5.70    2.90
  -6 -11  -3   33.20    5.90
   6  11   3   27.70    5.20
  -7 -11  -3    4.30    4.10
   7  11   3    0.80    3.20
  -5  12   3   32.80    5.10
  -4  12   3    3.90    2.80
  -4  12   3    2.10    2.40
  -3  12   3   65.89    6.30
  -2  12   3  105.49    7.40
  -2  12   3   83.29    5.10
  -1  12   3    7.60    2.30
  -1  12   3    9.40    1.60
  -1  12   3    8.00    1.50
   0 -12  -3  131.59    8.80
   0  12   3  143.39    9.20
   0  12   3  141.09    9.00
   0  12   3  154.38    9.40
  -1 -12  -3    7.60    2.10
   1  12   3   11.10    1.70
   1  12   3    7.70    2.20
   1  12   3   10.80    2.50
  -2 -12  -3  117.69    8.10
  -2 -12  -3  104.29    6.60
   2  12   3   99.09    8.00
  -3 -12  -3   90.99    7.50
   3  12   3   83.79    7.40
  -4 -12  -3   42.10    5.70
   4  12   3   27.30    4.80
  -5 -12  -3   59.29    7.40
   5  12   3   71.19    7.60
  -6 -12  -3    1.20    3.40
   6  12   3   -1.80    2.40
  -6  13   3   72.99    9.60
  -5  13   3   17.10    4.50
  -5  13   3   11.60    3.40
  -4  13   3  163.08   12.10
  -4  13   3  176.08   12.70
  -3  13   3   39.00    5.20
  -2  13   3    8.90    2.90
  -2  13   3   11.90    1.30
  -1  13   3    3.50    2.30
  -1  13   3    2.70    1.40
  -1  13   3    0.20    1.30
   0 -13  -3   -0.20    1.10
   0  13   3    0.10    1.40
   0  13   3    0.10    1.50
   0  13   3   -0.70    1.40
  -1 -13  -3   33.70    3.80
   1  13   3   18.60    3.20
   1  13   3   32.90    4.20
   1  13   3   32.00    2.50
  -2 -13  -3   64.69    6.00
   2  13   3   69.89    6.30
  -3 -13  -3   16.60    3.60
   3  13   3   11.80    3.20
  -4 -13  -3   95.09    8.30
   4  13   3   78.29    7.50
  -5 -13  -3    0.10    3.20
   5  13   3    0.90    2.80
  -6 -13  -3   59.59    8.20
   6  13   3   41.40    6.40
  -6  14   3    0.10    3.80
  -5  14   3    1.00    3.70
  -5  14   3    4.80    3.30
  -4  14   3   47.50    6.10
  -4  14   3   43.30    6.30
  -3  14   3   12.30    3.50
  -2  14   3   97.19    7.30
  -2  14   3   72.59    4.60
  -2  14   3   72.89    4.60
  -1  14   3    6.30    2.00
  -1  14   3    5.40    2.50
  -1  14   3   10.10    1.90
   0  14   3   99.89    6.60
   0  14   3   82.69    6.90
  -1 -14  -3    4.30    1.90
   1  14   3    2.70    2.00
   1  14   3    6.70    1.20
  -2 -14  -3  128.29    9.00
   2  14   3  109.39    9.00
  -3 -14  -3   12.10    3.60
   3  14   3   12.20    3.30
  -4 -14  -3    7.50    3.40
   4  14   3   15.10    3.90
  -5 -14  -3    7.80    4.00
   5  14   3    7.70    3.80
  -6 -14  -3   -6.00    3.30
   6  14   3    4.30    3.30
  -5  15   3   14.70    4.20
  -5  15   3    8.70    3.70
  -4  15   3   16.20    4.30
  -4  15   3   17.70    4.30
  -3  15   3   40.70    6.00
  -3  15   3   56.59    6.70
  -2  15   3   13.30    3.30
  -2  15   3   11.30    1.50
  -1  15   3   42.10    5.00
   0  15   3   10.10    2.60
   0  15   3   12.20    2.20
   1  15   3  151.38   10.60
   2  15   3   36.50    5.00
  -3 -15  -3   24.00    4.50
   3  15   3   22.70    4.30
  -4 -15  -3   45.80    6.40
   4  15   3   43.80    6.30
  -5 -15  -3   -3.30    3.00
   5  15   3   -0.30    2.90
  -5  16   3   48.20    7.00
  -5  16   3   54.99    8.00
  -4  16   3    2.60    3.30
  -4  16   3   -0.30    2.50
  -3  16   3   27.80    5.00
  -3  16   3   22.20    4.90
  -2  16   3   41.70    5.30
  -2  16   3   25.80    2.50
  -1  16   3   23.00    6.10
   0  16   3   51.89    5.00
   1  16   3    9.20    2.70
   2  16   3    8.40    3.10
   3  16   3   45.60    6.30
   4  16   3   10.60    3.60
   5  16   3   29.50    5.50
  -4  17   3    1.60    3.10
  -4  17   3    3.90    3.30
  -3  17   3   57.39    7.90
   0  17   3    6.90    2.40
   1  17   3   57.09    6.20
   2  17   3   14.40    3.50
   3  17   3   23.60    4.60
   4  17   3    7.30    3.70
  -3  18   3   21.20    5.20
  -1  18   3   -0.40    1.50
   1  18   3    3.00    2.40
   2  18   3    8.80    3.40
   3  18   3   21.10    4.90
  -2  19   3   10.50    4.60
  -1  19   3    2.50    2.00
   1  19   3   10.20    3.10
   2  19   3   18.40    4.20
   0  20   3   80.59    7.20
   2  18  -4    7.40    4.20
   1  18  -4    6.00    4.20
   1  18  -4   -3.80    2.80
   0  18  -4   93.99   10.70
   0  18  -4   95.49    8.70
  -1  18  -4    1.00    3.10
  -1  18  -4    4.00    2.60
  -2  18  -4   48.70    5.70
  -2  18  -4   52.19    8.30
   3  17  -4   -2.30    3.60
   3  17  -4    5.20    3.90
   2  17  -4   12.40    4.60
   2  17  -4   13.60    4.60
   1  17  -4   22.90    5.40
   1  17  -4   23.80    4.90
   0  17  -4    6.90    3.30
   0  17  -4    3.90    3.50
  -1  17  -4   60.09    6.50
  -1  17  -4   49.90    7.60
  -2  17  -4    1.10    2.30
  -2  17  -4   -1.80    3.20
  -3  17  -4   13.50    4.90
   3  16  -4   82.39    9.60
   3  16  -4   94.29    9.00
   2  16  -4   -8.20    2.80
   2  16  -4   -4.80    2.90
   1  16  -4   45.90    6.40
   1  16  -4   44.70    6.80
   0  16  -4   12.70    3.50
   0  16  -4    3.20    3.20
  -1  16  -4    4.60    2.70
  -1  16  -4    2.80    3.30
  -2  16  -4    8.80    3.90
  -2  16  -4    5.40    2.60
  -3  16  -4   12.20    2.40
  -3  16  -4   17.60    4.90
  -4  16  -4    6.30    3.60
   4  15  -4    4.70    3.80
   4  15  -4    0.20    3.00
  -4 -15   4    1.00    6.30
   3  15  -4   21.20    4.90
   3  15  -4   17.70    4.30
   2  15  -4    5.60    3.30
   2  15  -4    3.30    3.30
   1  15  -4   81.39    7.80
   1  15  -4   89.29    8.60
   0  15  -4    1.60    2.90
   0  15  -4    1.30    2.50
  -1  15  -4  122.89    9.20
  -1  15  -4  127.99   10.80
  -2  15  -4   -0.50    2.80
  -2  15  -4    2.40    2.30
  -3  15  -4  110.49    7.50
  -3  15  -4  105.59   10.00
  -4  15  -4   11.20    4.20
  -5  15  -4   23.80    5.70
   5  14  -4   73.19    9.30
  -5 -14   4   71.29    9.60
   4  14  -4   14.20    4.40
   4  14  -4    6.40    3.20
  -4 -14   4   12.30    4.60
   3  14  -4  129.99   10.50
   3  14  -4  127.49   10.70
  -3 -14   4  139.19   11.20
   2  14  -4   41.90    6.10
   2  14  -4   48.20    6.50
  -2 -14   4   46.30    6.20
   1  14  -4   53.49    6.40
   1  14  -4   43.60    6.30
  -1 -14   4   53.59    7.00
   0  14  -4   88.19    7.50
   0  14  -4   89.49    8.40
  -1  14  -4    5.60    2.60
  -1  14  -4    2.30    2.80
  -2  14  -4   66.49    8.00
  -2  14  -4   64.39    5.80
  -3  14  -4   14.80    4.30
  -3  14  -4   17.90    2.80
  -4  14  -4   41.60    6.40
  -4  14  -4   41.10    3.60
  -5  14  -4   14.40    4.30
  -5 -13   4    5.00    4.10
   4  13  -4   64.79    7.30
  -4 -13   4   84.29    9.40
   3  13  -4    1.90    3.00
   3  13  -4   -0.10    2.30
  -3 -13   4   -1.90    2.70
   2  13  -4   98.59    8.40
   2  13  -4   95.79    8.30
  -2 -13   4  100.19    8.70
   1  13  -4   -3.90    2.00
   1  13  -4    0.90    2.40
  -1 -13   4    2.40    2.30
   0  13  -4   63.59    5.90
   0  13  -4   57.09    6.80
   0 -13   4   59.29    5.80
  -1  13  -4   13.50    3.80
  -1  13  -4   20.10    3.30
  -2  13  -4   -0.80    2.30
  -2  13  -4    0.30    2.00
  -3  13  -4    3.80    3.10
  -3  13  -4    3.00    1.60
  -4  13  -4   32.90    5.80
  -4  13  -4   27.30    3.00
  -5  13  -4   -1.70    2.90
  -6  13  -4   56.29    7.90
  -6 -12   4   11.00    5.10
  -5 -12   4   -3.50    3.20
   4  12  -4   10.40    3.30
  -4 -12   4   17.40    4.70
   3  12  -4   -1.80    2.20
  -3 -12   4    1.00    2.60
   2  12  -4   51.19    6.10
   2  12  -4   52.09    6.30
  -2 -12   4   43.70    5.90
   1  12  -4    0.20    1.80
   1  12  -4   -2.10    2.00
   1  12  -4   -2.20    1.80
  -1 -12   4    2.50    2.30
   0  12  -4  352.96   21.10
   0  12  -4  358.16   21.40
   0  12  -4  346.57   22.10
   0 -12   4  364.36   21.50
  -1  12  -4   -0.80    1.70
  -1  12  -4    1.90    2.20
  -1  12  -4   -0.20    1.50
  -1  12  -4   -0.70    0.90
   1 -12   4    0.40    1.70
  -2  12  -4  192.98   13.10
  -2  12  -4  177.78   11.30
  -2  12  -4  179.58   11.60
  -3  12  -4   -1.90    2.40
  -3  12  -4    3.00    1.50
  -4  12  -4   45.40    6.50
  -4  12  -4   46.30    3.90
  -5  12  -4    0.70    1.30
  -5  12  -4    6.10    3.50
  -6  12  -4   10.50    4.30
  -6 -11   4   63.29    9.10
   5  11  -4    1.80    4.10
  -5 -11   4   -3.40    3.20
   4  11  -4   66.59    6.40
  -4 -11   4   76.89    8.50
   3  11  -4   24.30    4.10
  -3 -11   4   31.60    4.90
   2  11  -4  206.98   14.20
   2  11  -4  214.58   14.40
  -2 -11   4  236.68   14.80
   1  11  -4   55.59    5.20
   1  11  -4   49.20    5.90
   1  11  -4   59.59    5.60
  -1 -11   4   56.99    5.50
   0  11  -4   57.49    5.10
   0  11  -4   59.89    6.50
   0  11  -4   66.99    5.60
   0 -11   4   59.19    5.50
  -1  11  -4  112.09    9.20
  -1  11  -4  126.49    8.40
  -1  11  -4  129.59    8.60
  -1  11  -4  124.19    7.70
   1 -11   4  128.69    8.60
  -2  11  -4   -1.10    2.10
  -2  11  -4    2.50    1.30
  -2  11  -4    1.10    1.70
   2 -11   4    1.00    1.10
  -3  11  -4   76.89    7.40
  -3  11  -4   78.49    5.50
  -3  11  -4   73.69    5.50
  -4  11  -4   20.20    2.60
  -4  11  -4   20.00    4.60
  -5  11  -4   19.80    2.70
  -5  11  -4   15.60    4.10
  -6  11  -4   58.69    4.90
  -6  11  -4   49.60    7.20
  -6 -10   4    1.70    3.40
   5  10  -4   96.59    7.40
  -5 -10   4   84.79    9.50
   4  10  -4   -1.70    1.70
  -4 -10   4   -4.70    2.50
   3  10  -4   87.69    7.20
  -3 -10   4   84.59    7.80
  -3 -10   4   94.09    5.80
   2  10  -4   28.10    4.30
   2  10  -4   34.70    4.40
  -2 -10   4   37.10    5.00
   1  10  -4   94.39    7.20
   1  10  -4   83.89    6.70
   1  10  -4   82.59    6.80
  -1 -10   4   90.59    7.10
   0  10  -4   21.40    3.20
   0  10  -4   23.10    3.80
   0  10  -4   27.40    3.60
   0 -10   4   31.50    3.80
  -1  10  -4    5.40    1.30
  -1  10  -4    0.90    1.30
  -1  10  -4    5.20    1.90
  -1  10  -4    5.10    2.20
   1 -10   4    3.20    1.70
  -2  10  -4   11.30    2.10
  -2  10  -4   14.60    3.60
  -2  10  -4   18.00    2.90
  -3  10  -4   59.69    4.70
  -3  10  -4   52.59    6.40
  -3  10  -4   61.29    4.70
   3 -10   4   57.59    3.80
   3 -10   4   65.19    3.90
  -4  10  -4   -0.20    2.40
  -4  10  -4   -1.60    1.30
  -4  10  -4   -1.50    1.20
  -5  10  -4   69.19    5.40
  -5  10  -4   66.29    7.80
  -6  10  -4    4.10    1.90
  -6  10  -4    3.90    3.40
  -7  10  -4   42.70    4.90
  -6  -9   4   -3.60    2.50
   5   9  -4    2.50    1.80
  -5  -9   4    0.40    2.80
  -5  -9   4   -0.50    2.60
   4   9  -4   14.60    3.00
  -4  -9   4   12.70    3.80
  -4  -9   4   12.30    2.50
   3   9  -4   56.49    5.20
  -3  -9   4   55.69    6.30
  -3  -9   4   57.59    4.30
   2   9  -4    2.10    1.70
  -2  -9   4    2.10    2.10
   1   9  -4  208.78   13.50
   1   9  -4  217.28   13.40
   1   9  -4  208.58   13.40
  -1  -9   4  215.58   13.60
   0   9  -4    2.70    1.70
   0   9  -4    0.70    1.80
   0   9  -4    2.20    1.50
   0   9  -4    2.60    0.80
   0  -9   4    3.10    1.90
  -1   9  -4  456.55   28.00
  -1   9  -4  528.05   27.50
  -1   9  -4  468.15   27.30
  -1   9  -4  445.36   26.80
   1  -9   4  500.05   27.50
  -2   9  -4   25.30    3.20
  -2   9  -4   25.00    3.90
  -2   9  -4   24.60    2.90
   2  -9   4   24.50    2.40
  -3   9  -4  170.58   12.80
  -3   9  -4  198.68   11.70
  -3   9  -4  195.98   11.90
   3  -9   4  200.38   11.20
  -4   9  -4    3.50    1.50
  -4   9  -4    0.80    2.30
  -4   9  -4    3.00    1.40
   4  -9   4    2.30    0.90
  -5   9  -4   39.80    5.80
  -5   9  -4   36.10    3.90
  -6   9  -4   -1.20    2.80
  -6   9  -4    2.40    1.80
  -7   9  -4   -2.50    1.80
  -7  -8   4   25.40    5.70
  -6  -8   4   14.80    3.70
  -6  -8   4   11.50    4.10
   5   8  -4  195.08   12.40
  -5  -8   4  204.98   14.40
  -5  -8   4  198.28   13.00
   4   8  -4    4.00    1.90
  -4  -8   4    2.30    1.70
  -4  -8   4    2.00    2.60
   3   8  -4  130.79    8.90
  -3  -8   4  135.09    9.80
  -3  -8   4  127.89    8.30
   2   8  -4   80.69    6.20
  -2  -8   4   88.79    6.80
  -2  -8   4   79.09    5.10
   1   8  -4   43.30    4.50
   1   8  -4   37.90    4.30
   1   8  -4   43.40    4.10
  -1  -8   4   31.50    4.00
   0   8  -4  103.79    7.10
   0   8  -4  100.19    6.20
   0   8  -4  108.09    7.50
   0   8  -4  100.29    7.20
   0  -8   4  108.79    7.40
  -1   8  -4    1.00    1.60
  -1   8  -4   -0.80    1.00
  -1   8  -4    1.40    1.40
  -1   8  -4   -0.80    0.80
   1  -8   4    0.20    1.00
   1  -8   4   -0.80    1.30
  -2   8  -4   80.69    5.70
  -2   8  -4   76.29    6.30
  -2   8  -4   73.79    5.50
   2  -8   4   74.29    5.10
  -3   8  -4   46.90    4.10
  -3   8  -4   49.20    5.50
  -3   8  -4   48.10    4.00
   3  -8   4   51.69    3.50
   3  -8   4   43.90    3.40
  -4   8  -4   19.60    2.70
  -4   8  -4   18.40    3.70
  -4   8  -4   20.10    2.60
   4  -8   4   17.20    2.00
   4  -8   4   18.10    1.90
  -5   8  -4  107.59    8.50
  -5   8  -4   81.49    6.40
  -6   8  -4   -1.10    2.40
  -6   8  -4   -0.40    1.70
  -7   8  -4   48.70    5.50
  -7  -7   4   29.80    6.30
  -7  -7   4   23.40    7.10
  -6  -7   4   90.29    9.90
   5   7  -4   30.70    3.30
  -5  -7   4   23.40    3.90
  -5  -7   4   38.10    5.80
   4   7  -4  155.58    9.90
  -4  -7   4  157.58   10.20
  -4  -7   4  147.79   11.20
   3   7  -4   24.90    3.20
  -3  -7   4   27.00    3.10
  -3  -7   4   28.90    4.40
   2   7  -4    5.10    1.90
   2   7  -4    4.60    1.80
  -2  -7   4    3.20    2.20
  -2  -7   4    3.30    1.20
   1   7  -4   79.29    5.90
   1   7  -4   66.39    5.60
   1   7  -4   84.09    6.00
  -1  -7   4   81.09    6.10
   0   7  -4    1.90    1.50
   0   7  -4    1.70    1.30
   0   7  -4    0.40    1.40
   0   7  -4    2.30    0.90
   0  -7   4    0.80    1.60
   0  -7   4    1.40    1.30
  -1   7  -4   71.79    5.20
  -1   7  -4   67.19    4.70
  -1   7  -4   69.89    5.60
  -1   7  -4   70.19    5.20
   1  -7   4   69.79    5.20
  -2   7  -4    4.20    1.60
  -2   7  -4    0.90    1.70
  -2   7  -4    0.60    1.20
   2  -7   4   -0.30    0.80
   2  -7   4    1.00    1.00
  -3   7  -4  113.89    8.40
  -3   7  -4  120.39    7.50
  -3   7  -4  118.09    7.70
   3  -7   4  113.19    7.20
  -4   7  -4   88.19    7.30
  -4   7  -4   93.79    6.20
  -4   7  -4   92.59    6.30
   4  -7   4   87.19    6.40
   4  -7   4   82.79    5.60
  -5   7  -4   10.90    2.40
  -5   7  -4   15.10    2.70
  -5   7  -4   12.20    3.40
  -6   7  -4  130.39    9.60
  -6   7  -4  152.08   11.10
  -7   7  -4    3.10    2.50
  -7   7  -4   11.30    5.10
  -8   7  -4   48.40    6.20
  -7  -6   4    5.80    3.80
  -6  -6   4    8.30    3.50
   5   6  -4   19.50    2.50
  -5  -6   4   24.10    4.60
   4   6  -4   52.59    4.40
  -4  -6   4   66.99    6.90
   3   6  -4   67.69    5.10
  -3  -6   4   63.89    6.10
  -3  -6   4   68.09    5.10
   2   6  -4  669.93   35.60
   2   6  -4  640.64   35.90
  -2  -6   4  607.74   35.10
  -2  -6   4  604.34   36.00
   1   6  -4   36.10    3.70
   1   6  -4   26.80    3.20
   1   6  -4   28.60    3.30
  -1  -6   4   28.10    3.50
  -1  -6   4   28.00    2.40
  -1  -6   4   28.80    3.50
   0   6  -4  805.22   46.80
   0   6  -4  908.01   47.50
   0   6  -4  824.92   47.30
   0   6  -4  879.51   47.60
   0  -6   4  841.82   47.60
   0  -6   4  847.22   47.30
  -1   6  -4    7.00    1.70
  -1   6  -4    6.70    1.40
  -1   6  -4    6.90    1.80
  -1   6  -4    6.00    2.00
   1  -6   4    8.40    1.90
  -2   6  -4  827.32   46.40
  -2   6  -4  897.11   46.40
  -2   6  -4  802.82   46.90
   2  -6   4  786.42   46.10
   2  -6   4  850.81   46.10
  -3   6  -4   74.39    5.50
  -3   6  -4   67.39    6.10
  -3   6  -4   90.69    5.60
   3  -6   4   74.09    5.30
   3  -6   4   77.39    5.10
  -4   6  -4  274.17   15.60
  -4   6  -4  258.57   15.40
  -4   6  -4  281.87   16.80
   4  -6   4  240.28   15.10
  -5   6  -4   15.00    3.40
  -5   6  -4   16.30    2.80
  -5   6  -4   20.60    3.00
   5  -6   4   21.50    2.50
  -6   6  -4    1.10    1.90
  -6   6  -4    2.30    2.70
  -7   6  -4   -0.80    2.80
  -7   6  -4   -0.60    2.10
  -8   6  -4   16.30    4.10
  -7  -5   4    4.90    3.60
  -6  -5   4  104.39    9.40
   5   5  -4    5.20    1.40
  -5  -5   4    0.90    2.30
   4   5  -4  252.77   15.00
  -4  -5   4  267.07   16.60
   3   5  -4   21.20    2.50
  -3  -5   4   19.70    3.40
  -3  -5   4   20.80    2.90
   2   5  -4  313.97   17.50
   2   5  -4  297.77   17.90
  -2  -5   4  299.17   17.40
  -2  -5   4  292.47   17.90
  -2  -5   4  298.87   18.10
   1   5  -4   -0.40    1.10
   1   5  -4   -0.80    1.20
   1   5  -4   -1.00    1.10
  -1  -5   4    1.00    1.00
  -1  -5   4    0.00    1.20
  -1  -5   4    1.00    1.50
   0   5  -4   23.20    2.90
   0   5  -4   28.60    3.10
   0   5  -4   32.90    3.20
   0   5  -4   26.80    2.40
   0  -5   4   23.10    3.00
  -1   5  -4  212.38   13.60
  -1   5  -4  223.88   13.40
  -1   5  -4  231.08   13.80
  -1   5  -4  242.48   14.10
   1  -5   4  241.78   13.70
   1  -5   4  239.48   14.00
   1  -5   4  229.18   13.50
  -2   5  -4   41.00    4.40
  -2   5  -4   37.30    3.50
  -2   5  -4   37.10    3.50
   2  -5   4   35.10    3.30
   2  -5   4   41.80    3.20
   2  -5   4   45.40    4.10
  -3   5  -4    1.20    1.30
  -3   5  -4    0.40    1.10
  -3   5  -4   -0.40    1.70
   3  -5   4    1.60    1.60
   3  -5   4    1.60    1.00
   3  -5   4    2.20    1.20
  -4   5  -4   51.99    4.40
  -4   5  -4   56.09    4.60
  -4   5  -4   54.89    5.80
   4  -5   4   57.29    4.30
  -5   5  -4    1.30    1.60
  -5   5  -4    0.40    1.70
  -5   5  -4    2.80    2.30
   5  -5   4    2.30    1.50
  -6   5  -4  173.08   11.60
  -6   5  -4  166.48   12.00
  -7   5  -4    3.40    2.70
  -7   5  -4    6.40    3.30
  -8   5  -4   52.69    6.80
  -7  -4   4   43.60    6.40
  -6  -4   4   34.10    5.60
   5   4  -4  130.29    7.60
  -5  -4   4  127.29    9.90
   4   4  -4    1.80    1.00
  -4  -4   4    2.10    2.00
   3   4  -4  128.99    7.80
  -3  -4   4  126.19    9.00
   2   4  -4  223.38   13.50
   2   4  -4  226.98   12.90
  -2  -4   4  209.28   13.50
  -2  -4   4  230.28   13.10
  -2  -4   4  205.98   13.30
   1   4  -4   14.00    2.30
   1   4  -4   11.30    2.00
   1   4  -4   15.90    2.20
  -1  -4   4   13.90    2.40
  -1  -4   4   12.90    1.90
  -1  -4   4   13.20    2.30
   0   4  -4  165.58    9.30
   0   4  -4  152.28    9.20
   0   4  -4  145.59    9.10
   0   4  -4  144.29    8.80
   0  -4   4  152.88    9.20
   0  -4   4  149.79    9.10
   0  -4   4  141.79    9.30
   0  -4   4  131.19    8.60
  -1   4  -4   21.30    2.40
  -1   4  -4   27.70    3.00
  -1   4  -4   24.10    2.80
  -1   4  -4   20.70    2.80
   1  -4   4   22.70    2.90
   1  -4   4   25.50    2.60
   1  -4   4   23.00    2.70
  -2   4  -4   52.99    4.20
  -2   4  -4   50.79    4.60
  -2   4  -4   51.09    4.10
   2  -4   4   56.79    3.90
   2  -4   4   47.60    4.00
   2  -4   4   64.09    4.60
  -3   4  -4   10.40    2.40
  -3   4  -4   11.90    2.10
  -3   4  -4   13.00    2.00
   3  -4   4   11.20    2.40
   3  -4   4   13.30    1.90
   3  -4   4   12.80    2.00
  -4   4  -4   80.29    6.10
  -4   4  -4   86.29    6.10
  -4   4  -4   92.39    7.00
   4  -4   4   84.99    6.40
   4  -4   4   86.89    5.90
  -5   4  -4  157.48   10.80
  -5   4  -4  141.59   10.10
  -5   4  -4  170.78   10.30
   5  -4   4  148.49    9.90
  -6   4  -4    4.20    2.20
  -6   4  -4    4.70    2.50
  -7   4  -4   86.39    7.50
  -7   4  -4   84.59    7.80
  -8   4  -4   20.20    4.50
  -7  -3   4   49.20    6.60
  -6  -3   4   10.20    3.40
  -5  -3   4   14.30    3.50
   4   3  -4   12.30    1.40
  -4  -3   4    9.30    2.70
   3   3  -4   72.09    4.70
  -3  -3   4   66.79    5.90
  -3  -3   4   77.89    5.80
   2   3  -4    0.80    1.20
   2   3  -4    0.70    1.00
   2   3  -4    0.60    1.40
  -2  -3   4    0.40    1.40
  -2  -3   4   -2.20    1.30
  -2  -3   4    0.10    1.10
   1   3  -4  710.93   40.00
   1   3  -4  740.53   39.60
   1   3  -4  719.03   39.70
   1   3  -4  676.83   39.90
  -1  -3   4  708.73   39.90
  -1  -3   4  734.93   39.70
  -1  -3   4  709.53   40.00
   0   3  -4   17.80    2.30
   0   3  -4   20.90    2.50
   0   3  -4   18.30    2.40
   0   3  -4   15.20    2.10
   0  -3   4   12.90    2.30
   0  -3   4   18.00    2.30
   0  -3   4   16.50    2.30
   0  -3   4   17.90    2.20
  -1   3  -4  619.34   34.20
  -1   3  -4  552.84   34.30
  -1   3  -4  628.74   34.50
  -1   3  -4  647.14   34.40
   1  -3   4  583.44   34.20
   1  -3   4  636.44   34.60
   1  -3   4  624.44   34.30
  -2   3  -4   13.80    2.00
  -2   3  -4   14.10    2.50
  -2   3  -4   13.80    2.20
   2  -3   4   14.30    1.90
   2  -3   4   15.20    2.50
   2  -3   4   15.30    2.10
  -3   3  -4  734.23   37.70
  -3   3  -4  687.93   37.60
  -3   3  -4  637.94   38.20
   3  -3   4  691.03   37.50
   3  -3   4  652.43   38.10
   3  -3   4  633.14   37.50
  -4   3  -4    2.60    1.90
  -4   3  -4    4.80    1.70
  -4   3  -4    6.30    1.90
   4  -3   4    3.10    1.60
   4  -3   4    5.60    1.70
  -5   3  -4  102.69    7.40
  -5   3  -4  110.39    7.90
  -5   3  -4  100.39    7.40
   5  -3   4   97.09    7.10
   5  -3   4   90.09    7.10
  -6   3  -4   -0.40    2.00
  -6   3  -4    5.60    2.10
   6  -3   4    0.70    1.70
  -7   3  -4   10.30    3.00
  -8   3  -4    3.00    3.20
  -8  -2   4    9.70    4.80
  -7  -2   4  119.49   10.50
  -6  -2   4   12.10    3.70
  -5  -2   4  131.29    9.90
  -4  -2   4    1.40    2.00
  -4  -2   4   -0.70    1.70
   3   2  -4  117.29    7.00
  -3  -2   4  128.19    8.20
  -3  -2   4  114.59    8.20
   2   2  -4    2.70    1.00
   2   2  -4    6.20    1.80
   2   2  -4    3.30    1.40
  -2  -2   4    3.10    1.60
  -2  -2   4    3.90    1.40
  -2  -2   4    0.90    1.50
   1   2  -4  279.87   15.70
   1   2  -4  273.17   16.00
   1   2  -4  271.47   15.70
   1   2  -4  275.07   15.90
  -1  -2   4  270.97   15.60
  -1  -2   4  258.17   16.00
  -1  -2   4  285.17   15.90
   0   2  -4   26.00    2.60
   0   2  -4   34.00    3.20
   0   2  -4   26.00    2.80
   0   2  -4   28.30    3.00
   0  -2   4   27.50    2.90
   0  -2   4   21.40    2.70
   0  -2   4   27.80    2.90
   0  -2   4   26.60    2.70
  -1   2  -4   20.30    2.40
  -1   2  -4   19.00    2.70
  -1   2  -4   19.40    2.40
  -1   2  -4   19.60    2.60
   1  -2   4   20.20    2.50
   1  -2   4   24.60    2.90
   1  -2   4   18.80    2.50
  -2   2  -4   24.90    2.60
  -2   2  -4   20.90    2.90
  -2   2  -4   21.70    2.60
   2  -2   4   27.00    2.60
   2  -2   4   25.90    2.60
   2  -2   4   21.50    2.90
  -3   2  -4  388.66   22.60
  -3   2  -4  393.46   22.10
  -3   2  -4  372.46   22.00
   3  -2   4  383.76   21.90
   3  -2   4  380.16   22.50
   3  -2   4  396.46   22.00
  -4   2  -4   22.20    3.20
  -4   2  -4   18.70    2.80
  -4   2  -4   20.30    3.00
   4  -2   4   21.10    3.00
   4  -2   4   21.20    2.90
  -5   2  -4  181.58   11.70
  -5   2  -4  170.28   11.70
  -5   2  -4  184.48   11.90
   5  -2   4  187.18   11.70
   5  -2   4  182.48   11.60
  -6   2  -4    0.90    2.30
  -6   2  -4    5.20    2.60
   6  -2   4   -1.70    1.90
  -7   2  -4  147.29   11.20
  -8   2  -4    0.90    3.20
  -8  -1   4   10.20    4.10
  -7  -1   4   11.50    3.80
  -6  -1   4   12.20    3.50
  -5  -1   4    7.20    2.60
  -4  -1   4  162.78   11.00
  -4  -1   4  165.58   10.90
   3   1  -4   92.39    6.10
   3   1  -4   75.59    6.30
  -3  -1   4   88.69    6.20
  -3  -1   4   78.29    6.20
   2   1  -4  123.89    7.30
   2   1  -4  123.89    8.00
   2   1  -4  135.89    8.00
  -2  -1   4  116.79    8.00
  -2  -1   4  116.89    8.00
  -2  -1   4  127.19    8.00
   1   1  -4  512.35   30.50
   1   1  -4  570.44   30.80
   1   1  -4  512.05   30.80
   1   1  -4  564.14   30.90
  -1  -1   4  555.74   30.90
  -1  -1   4  574.54   30.60
  -1  -1   4  580.24   30.90
  -1  -1   4  537.25   30.80
   0   1  -4    2.70    1.50
   0   1  -4    3.20    1.40
   0   1  -4    2.40    1.40
   0   1  -4    2.20    1.30
   0  -1   4    3.20    1.40
   0  -1   4    2.00    1.40
   0  -1   4    2.70    1.40
   0  -1   4    1.60    1.40
  -1   1  -4 1681.03   90.39
  -1   1  -4 1689.93   90.59
  -1   1  -4 1636.34   90.29
  -1   1  -4 1667.53   90.29
   1  -1   4 1627.04   90.19
   1  -1   4 1691.83   90.29
   1  -1   4 1459.45   90.39
   1  -1   4 1728.53   90.39
  -2   1  -4   51.69    4.00
  -2   1  -4   52.09    4.50
  -2   1  -4   58.19    4.00
   2  -1   4   49.00    3.80
   2  -1   4   53.89    3.80
   2  -1   4   45.90    4.30
  -3   1  -4  150.48    9.80
  -3   1  -4  137.29    9.30
  -3   1  -4  153.68    9.40
   3  -1   4  154.78    9.30
   3  -1   4  145.79    9.80
   3  -1   4  157.58    9.30
  -4   1  -4   64.09    5.10
  -4   1  -4   58.49    5.30
  -4   1  -4   68.79    5.30
   4  -1   4   70.99    5.40
   4  -1   4   63.09    5.10
  -5   1  -4    9.40    2.30
  -5   1  -4   17.50    2.90
   5  -1   4    8.80    2.20
   5  -1   4    7.10    2.30
  -6   1  -4   89.59    7.50
  -6   1  -4   80.49    7.10
   6  -1   4   69.99    6.80
   6  -1   4   94.29    9.00
  -8   1  -4   64.09    8.30
  -8   0   4   36.00    6.30
  -7   0   4   35.70    5.70
   6   0  -4    5.90    2.50
  -6   0   4   13.10    3.30
  -5   0   4   39.20    5.10
  -5   0   4   52.59    5.60
   4   0  -4   59.19    5.00
  -4   0   4   62.19    5.50
  -4   0   4   61.69    5.30
   3   0  -4  117.29    7.70
   3   0  -4  111.59    7.60
  -3   0   4  115.39    7.90
  -3   0   4  120.19    7.80
   2   0  -4  264.67   14.90
   2   0  -4  268.47   15.00
  -2   0   4  266.77   15.10
  -2   0   4  240.88   15.10
  -2   0   4  235.08   14.10
  -2   0   4  267.77   15.00
   1   0  -4   72.69    5.00
   1   0  -4   80.59    5.20
   1   0  -4   65.09    4.70
   1   0  -4   72.69    5.00
  -1   0   4   69.09    4.70
  -1   0   4   76.59    5.20
  -1   0   4   82.09    5.20
  -1   0   4   77.69    5.20
   0   0  -4   32.30    3.00
   0   0  -4   34.00    3.10
   0   0  -4   37.50    3.30
   0   0  -4   31.90    3.20
   0   0   4   35.10    3.00
   0   0   4   34.10    3.10
   0   0   4   34.00    3.20
   0   0   4   35.90    3.40
  -1   0  -4    4.40    1.60
  -1   0  -4    4.00    1.40
  -1   0  -4    4.00    1.70
  -1   0  -4    2.50    1.30
   1   0   4    4.30    1.40
   1   0   4    2.00    1.40
   1   0   4    2.60    1.30
   1   0   4    3.40    1.50
  -2   0  -4  775.22   43.50
  -2   0  -4  831.02   43.80
  -2   0  -4  873.31   43.90
  -2   0  -4  779.72   43.40
   2   0   4  757.52   43.40
   2   0   4  726.53   43.80
   2   0   4  749.42   43.40
  -3   0  -4    7.40    1.70
  -3   0  -4   11.70    2.20
  -3   0  -4    9.20    2.00
   3   0   4    9.60    1.90
   3   0   4    8.80    1.60
   3   0   4    9.30    2.30
  -4   0  -4  128.19    9.10
  -4   0  -4  138.39    9.00
  -4   0  -4  126.59    8.90
   4   0   4  149.39    9.40
   4   0   4  141.69    9.00
  -5   0  -4   21.30    3.40
  -5   0  -4   22.20    3.30
   5   0   4   20.20    3.00
   5   0   4   20.50    3.20
   6   0   4   -4.80    1.70
   6   0   4    2.60    2.20
  -7   0  -4   -0.30    2.50
   7   0   4   -1.60    2.60
  -8   0  -4   32.80    5.80
  -8   1   4  102.69   10.00
  -7   1   4   13.80    4.00
   6  -1  -4   80.39    6.70
  -6   1   4   71.39    7.20
   5  -1  -4    2.30    2.00
  -5   1   4    4.00    2.10
  -5   1   4    5.40    2.30
   4  -1  -4  260.37   15.00
  -4   1   4  248.08   15.20
  -4   1   4  235.68   15.20
   3  -1  -4   41.20    3.60
   3  -1  -4   39.40    3.50
  -3   1   4   42.30    3.70
  -3   1   4   38.50    3.80
   2  -1  -4  346.77   19.00
   2  -1  -4  346.17   19.00
  -2   1   4  330.17   19.00
  -2   1   4  312.97   18.30
  -2   1   4  325.47   19.40
  -2   1   4  333.47   19.10
   1  -1  -4    0.60    1.20
   1  -1  -4   -0.10    1.10
   1  -1  -4   -0.60    0.90
  -1   1   4   -0.20    1.30
  -1   1   4   -0.60    1.00
  -1   1   4    0.20    1.40
  -1   1   4   -0.50    0.80
   0  -1  -4   15.00    2.20
   0  -1  -4   13.70    2.10
   0  -1  -4   11.90    1.90
   0  -1  -4   11.80    2.20
   0   1   4   11.50    1.80
   0   1   4   12.90    2.10
   0   1   4   10.70    2.20
   0   1   4   16.50    2.20
  -1  -1  -4  425.76   24.60
  -1  -1  -4  481.35   24.90
  -1  -1  -4  426.46   24.50
  -1  -1  -4  388.96   24.70
   1   1   4  430.96   24.80
   1   1   4  427.76   24.60
   1   1   4  440.96   24.50
   1   1   4  481.85   24.90
  -2  -1  -4  237.78   14.00
  -2  -1  -4  249.68   14.00
  -2  -1  -4  229.48   14.20
  -2  -1  -4  255.47   14.30
   2   1   4  242.28   13.90
   2   1   4  242.98   14.00
   2   1   4  221.28   14.20
  -3  -1  -4    0.90    1.40
  -3  -1  -4   -0.70    1.40
   3   1   4    2.50    1.40
   3   1   4    0.40    1.50
   3   1   4    1.30    1.10
  -4  -1  -4  476.55   28.30
  -4  -1  -4  444.16   28.30
   4   1   4  537.25   28.40
   4   1   4  520.55   28.70
  -5  -1  -4   -1.20    1.80
  -5  -1  -4   -0.80    1.80
   5   1   4   -1.00    1.80
   5   1   4    1.10    1.70
  -6  -1  -4  207.28   15.10
   6   1   4  217.98   14.90
   6   1   4  291.07   16.80
  -7  -1  -4   -0.20    2.70
   7   1   4   -0.50    2.30
  -8  -1  -4   89.69   10.20
  -8   2   4   27.80    5.50
  -7   2   4   38.60    5.80
   6  -2  -4    1.70    2.50
  -6   2   4    4.40    2.50
   5  -2  -4   47.10    4.40
  -5   2   4   37.00    4.70
  -5   2   4   44.50    4.80
   4  -2  -4    1.70    1.30
  -4   2   4    3.00    1.70
  -4   2   4    0.20    1.50
   3  -2  -4    2.50    1.30
   3  -2  -4    0.50    1.00
  -3   2   4    2.50    1.40
  -3   2   4    1.70    1.20
   2  -2  -4  446.76   24.40
   2  -2  -4  450.75   24.30
  -2   2   4  430.56   24.40
  -2   2   4  398.16   24.80
   1  -2  -4  154.78    9.60
   1  -2  -4  172.28   10.00
   1  -2  -4  170.88    9.80
  -1   2   4  161.78   10.10
  -1   2   4  160.38    9.70
  -1   2   4  161.48    9.80
   0  -2  -4 1298.67   70.29
   0  -2  -4 1299.27   70.39
   0  -2  -4 1365.36   70.79
   0   2   4 1223.28   70.69
   0   2   4 1171.78   70.29
   0   2   4 1342.27   70.39
  -1  -2  -4    7.70    1.60
  -1  -2  -4   10.60    1.90
  -1  -2  -4    9.30    1.70
   1   2   4    9.70    2.00
   1   2   4   10.80    1.70
   1   2   4    8.90    1.70
  -2  -2  -4  452.05   25.50
  -2  -2  -4  442.16   25.30
  -2  -2  -4  467.35   25.30
   2   2   4  455.85   25.20
   2   2   4  440.56   25.20
   2   2   4  427.36   25.40
  -3  -2  -4   41.90    3.90
  -3  -2  -4   39.50    4.10
   3   2   4   40.40    3.80
   3   2   4   46.60    3.60
   3   2   4   44.50    3.90
  -4  -2  -4  209.18   13.80
  -4  -2  -4  213.38   13.70
   4   2   4  230.88   13.80
   4   2   4  237.48   13.80
  -5  -2  -4   59.69    5.50
   5   2   4   53.29    5.00
   5   2   4   61.29    5.50
   6   2   4    1.60    2.30
  -7  -2  -4   93.99    9.50
   7   2   4   74.19    7.50
  -8  -2  -4   39.90    6.70
  -8   3   4   37.10    6.20
  -7   3   4   21.60    4.10
  -6   3   4   30.50    4.30
   5  -3  -4    2.60    1.70
  -5   3   4    2.00    1.70
   4  -3  -4   78.59    5.80
  -4   3   4   92.49    6.20
  -4   3   4   80.89    6.10
   3  -3  -4   68.39    4.80
   3  -3  -4   76.29    5.10
  -3   3   4   73.49    5.10
  -3   3   4   68.39    5.10
   2  -3  -4   69.59    4.80
   2  -3  -4   69.89    4.60
  -2   3   4   70.89    4.80
  -2   3   4   71.29    5.50
   1  -3  -4  790.22   46.50
   1  -3  -4  913.51   47.10
   1  -3  -4  888.81   46.60
  -1   3   4  869.71   46.70
  -1   3   4  785.52   46.60
  -1   3   4  826.02   47.00
   0  -3  -4    2.00    1.40
   0  -3  -4    0.30    1.10
   0  -3  -4   -0.60    1.10
   0   3   4    0.10    1.60
   0   3   4   -0.40    1.00
   0   3   4    0.00    0.90
  -1  -3  -4  670.23   36.10
  -1  -3  -4  628.04   36.40
  -1  -3  -4  665.43   36.00
   1   3   4  652.63   36.00
   1   3   4  651.13   36.00
   1   3   4  627.34   36.30
  -2  -3  -4   30.30    3.00
  -2  -3  -4   28.90    3.10
  -2  -3  -4   27.60    2.90
   2   3   4   31.60    2.90
   2   3   4   27.40    2.70
  -3  -3  -4  267.47   15.30
  -3  -3  -4  238.88   15.30
  -3  -3  -4  244.08   15.30
   3   3   4  257.37   15.30
   3   3   4  266.87   15.20
   3   3   4  260.37   15.30
  -4  -3  -4   25.50    3.60
  -4  -3  -4   18.90    3.20
   4   3   4   14.30    2.60
   4   3   4   18.70    2.80
  -5  -3  -4   32.10    4.40
   5   3   4   20.50    3.60
   5   3   4   17.00    3.00
  -6  -3  -4   13.00    3.40
   6   3   4   21.40    4.00
  -7  -3  -4   34.20    5.20
   7   3   4   14.20    3.90
  -8  -3  -4   10.40    4.50
  -8   4   4   -2.00    2.70
  -7   4   4   56.49    6.40
  -6   4   4    0.20    2.00
   5  -4  -4  175.68   11.20
  -5   4   4  184.68   11.70
  -5   4   4  180.08   11.60
   4  -4  -4   11.30    2.00
  -4   4   4   12.60    2.20
  -4   4   4    7.20    1.90
  -4   4   4   13.00    1.60
   3  -4  -4  268.77   15.10
   3  -4  -4  259.97   14.90
  -3   4   4  255.67   15.20
  -3   4   4  257.07   15.10
   2  -4  -4    2.40    0.80
   2  -4  -4    0.90    0.80
  -2   4   4    1.10    1.60
  -2   4   4    2.10    1.00
  -2   4   4    2.60    1.10
  -1   4   4   47.70    3.40
  -1   4   4   41.50    3.90
  -1   4   4   42.30    3.30
   0  -4  -4   27.90    3.00
   0  -4  -4   27.40    2.50
   0  -4  -4   28.80    2.50
   0   4   4   25.90    2.40
   0   4   4   36.60    3.70
   0   4   4   25.40    2.40
  -1  -4  -4    2.00    1.40
  -1  -4  -4   -0.40    1.10
  -1  -4  -4    1.10    1.20
   1   4   4    2.70    1.40
   1   4   4    2.00    1.10
   1   4   4    1.70    1.20
  -2  -4  -4    2.10    1.40
  -2  -4  -4   -1.80    1.10
  -2  -4  -4   -1.60    1.20
   2   4   4    0.40    1.10
   2   4   4   -0.20    1.20
  -3  -4  -4  145.39    9.10
  -3  -4  -4  126.19    9.10
  -3  -4  -4  129.39    8.90
   3   4   4  148.69    9.00
   3   4   4  143.89    9.00
  -4  -4  -4   -1.70    1.70
   4   4   4   -2.80    1.20
   4   4   4   -0.90    1.20
  -5  -4  -4  237.88   15.60
   5   4   4  249.78   15.40
   5   4   4  239.68   15.00
  -6  -4  -4   -0.60    2.20
   6   4   4   -0.40    2.10
  -7  -4  -4  146.99   11.40
   7   4   4  126.59   10.70
  -8  -4  -4    1.80    3.70
  -7   5   4   20.50    3.90
  -6   5   4   16.50    3.20
   5  -5  -4   14.30    2.40
  -5   5   4   11.70    2.40
  -5   5   4   15.60    1.90
  -5   5   4   16.40    2.70
  -4   5   4  151.78    8.70
  -4   5   4  130.69    8.80
  -4   5   4  137.59    8.90
   3  -5  -4  136.29    7.50
   3  -5  -4  105.19    7.50
  -3   5   4  129.19    7.80
  -3   5   4  138.39    7.90
   2  -5  -4   37.60    2.50
   2  -5  -4   37.10    2.60
  -2   5   4   39.00    4.30
  -2   5   4   35.10    2.90
  -2   5   4   33.80    2.70
   1  -5  -4  194.08   11.20
  -1   5   4  200.08   11.30
  -1   5   4  196.18   12.00
  -1   5   4  192.88   11.30
   0  -5  -4   16.90    2.40
   0  -5  -4   20.90    2.10
   0  -5  -4   19.80    2.00
   0   5   4   16.80    2.50
   0   5   4   20.80    2.10
   0   5   4   16.90    1.90
  -1  -5  -4  208.38   11.90
  -1  -5  -4  184.88   12.10
  -1  -5  -4  202.68   11.80
   1   5   4  197.28   11.70
   1   5   4  203.28   11.80
   1   5   4  206.08   12.10
  -2  -5  -4  178.58   11.30
  -2  -5  -4  174.98   11.10
  -2  -5  -4  186.88   11.30
   2   5   4  186.08   11.20
   2   5   4  197.68   11.20
  -3  -5  -4  138.79   10.00
  -3  -5  -4  160.68   10.10
  -3  -5  -4  148.09   10.00
   3   5   4  169.58   10.10
   3   5   4  169.38   10.20
  -4  -5  -4   85.09    6.90
   4   5   4   85.49    6.50
  -5  -5  -4   16.50    3.50
   5   5   4   12.80    2.90
   5   5   4   11.00    2.40
  -6  -5  -4   65.29    7.50
   6   5   4   74.69    7.60
   7   5   4   16.10    3.80
  -8  -5  -4   40.00    6.80
   8   5   4   30.80    5.60
  -7   6   4   30.50    4.80
  -6   6   4    2.30    2.00
  -5   6   4   47.80    4.60
  -5   6   4   50.49    4.70
  -5   6   4   59.39    4.50
   4  -6  -4   36.80    2.80
   4  -6  -4   36.60    3.00
  -4   6   4   36.30    3.30
  -4   6   4   31.90    3.30
  -4   6   4   40.90    3.40
   3  -6  -4   60.49    3.70
  -3   6   4   65.79    4.30
  -3   6   4   54.99    4.10
   2  -6  -4  101.89    5.40
   2  -6  -4   87.09    5.30
  -2   6   4   95.89    5.90
  -2   6   4  104.39    5.80
  -2   6   4   89.99    6.90
   1  -6  -4  125.69    7.30
   1  -6  -4  130.59    7.10
  -1   6   4  118.59    8.20
  -1   6   4  118.19    7.30
  -1   6   4  128.59    7.40
   0  -6  -4  427.26   24.30
   0  -6  -4  465.05   24.80
   0   6   4  441.86   25.00
   0   6   4  441.06   24.30
   0   6   4  404.36   24.20
  -1  -6  -4    4.60    1.70
  -1  -6  -4    4.50    1.40
  -1  -6  -4    4.60    1.40
   1   6   4    4.20    1.40
   1   6   4    4.10    1.30
   1   6   4    5.10    1.70
  -2  -6  -4  201.28   12.80
  -2  -6  -4  220.58   13.00
  -2  -6  -4  198.38   12.80
   2   6   4  204.08   12.70
   2   6   4  227.98   12.80
   2   6   4  226.88   12.90
  -3  -6  -4  187.48   11.90
  -3  -6  -4  191.98   12.10
   3   6   4  194.08   11.90
   3   6   4  186.78   11.80
  -4  -6  -4   71.89    5.70
  -4  -6  -4   64.19    6.00
   4   6   4   64.69    5.70
  -5  -6  -4   87.09    7.50
   5   6   4   88.49    7.20
  -6  -6  -4    9.30    3.50
   6   6   4   10.30    3.20
  -7  -6  -4   23.30    5.30
   7   6   4   35.40    5.50
  -8  -6  -4   23.20    5.80
   8   6   4   23.10    5.10
  -7   7   4    3.00    2.30
  -6   7   4  146.99   10.00
  -5   7   4   87.19    6.00
  -5   7   4   68.49    5.70
  -4   7   4  167.08   10.30
  -4   7   4  167.28    9.90
  -4   7   4  158.28   10.00
  -3   7   4  118.39    7.00
  -3   7   4  111.09    6.80
  -2   7   4  131.39    8.10
  -2   7   4  143.39    9.50
  -2   7   4  151.78    8.20
   1  -7  -4    7.60    1.10
   1  -7  -4    8.70    1.00
  -1   7   4   12.10    2.40
  -1   7   4    8.70    1.20
  -1   7   4   10.40    1.30
   0  -7  -4   80.99    5.50
   0  -7  -4   77.89    5.00
   0  -7  -4   72.39    5.00
   0   7   4   80.59    5.10
   0   7   4   78.99    5.00
   0   7   4   70.49    5.60
  -1  -7  -4   60.39    4.70
  -1  -7  -4   65.19    4.90
  -1  -7  -4   60.89    4.60
   1   7   4   69.69    4.70
   1   7   4   59.99    4.70
   1   7   4   67.79    4.70
  -2  -7  -4  262.27   15.20
  -2  -7  -4  246.08   15.10
  -2  -7  -4  251.37   15.20
   2   7   4  230.08   14.80
   2   7   4  260.67   15.20
   2   7   4  272.17   15.10
  -3  -7  -4    0.70    1.40
  -3  -7  -4   -0.60    1.60
   3   7   4   -0.80    1.30
   3   7   4    0.80    1.50
  -4  -7  -4  224.28   13.80
  -4  -7  -4  215.98   14.00
   4   7   4  208.68   13.90
  -5  -7  -4    0.90    2.40
   5   7   4   -2.20    2.00
  -6  -7  -4  193.68   13.40
   6   7   4  164.28   12.60
  -7  -7  -4    1.50    3.40
   7   7   4    3.90    3.10
  -8  -7  -4   78.39    9.80
   8   7   4   54.99    7.80
  -7   8   4    1.60    2.20
  -6   8   4    2.70    1.80
  -5   8   4    1.70    1.80
  -5   8   4    0.10    1.20
  -4   8   4   26.70    2.70
  -4   8   4   29.30    2.50
  -4   8   4   23.50    3.20
  -3   8   4   35.90    2.60
  -3   8   4   40.30    5.00
  -3   8   4   42.20    2.80
  -2   8   4  108.29    6.40
  -2   8   4  112.59    6.30
  -2   8   4  105.59    7.80
   1  -8  -4   59.69    3.80
   1  -8  -4   67.09    4.00
  -1   8   4   64.99    4.20
  -1   8   4   68.59    5.40
  -1   8   4   67.99    4.20
   0  -8  -4  280.97   15.70
   0  -8  -4  252.47   15.60
   0  -8  -4  270.97   16.10
   0   8   4  283.37   15.80
   0   8   4  287.57   15.70
   0   8   4  270.67   16.40
  -1  -8  -4  249.58   14.50
  -1  -8  -4  234.88   14.60
  -1  -8  -4  245.68   14.40
   1   8   4  260.57   14.50
   1   8   4  238.98   14.50
   1   8   4  244.88   14.50
  -2  -8  -4  225.38   13.90
  -2  -8  -4  240.88   13.90
   2   8   4  230.78   13.80
   2   8   4  215.38   13.40
   2   8   4  228.98   13.90
  -3  -8  -4    3.60    2.00
  -3  -8  -4    3.40    1.70
   3   8   4    3.00    1.80
  -4  -8  -4  120.09    8.30
  -4  -8  -4  116.89    8.70
   4   8   4  103.89    8.30
  -5  -8  -4   33.40    5.10
   5   8   4   36.00    5.10
  -6  -8  -4    2.40    3.10
   6   8   4   -1.90    2.40
  -7  -8  -4   35.60    6.40
   7   8   4   47.60    6.60
  -7   9   4    5.40    2.40
  -6   9   4   56.49    4.80
  -5   9   4    0.30    1.10
  -5   9   4    1.00    1.80
  -4   9   4   57.99    3.90
  -4   9   4   57.09    3.80
  -4   9   4   57.09    5.10
  -3   9   4   39.20    5.10
  -2   9   4    9.10    1.00
  -2   9   4   10.30    1.10
  -2   9   4    8.40    2.50
   1  -9  -4  450.35   24.50
   1  -9  -4  391.36   24.30
  -1   9   4  483.05   26.00
  -1   9   4  469.35   24.70
  -1   9   4  443.06   24.70
   0  -9  -4   14.30    1.90
   0  -9  -4    9.30    1.60
   0   9   4   11.90    1.90
   0   9   4   11.00    1.80
   0   9   4   12.50    2.50
  -1  -9  -4  264.87   16.70
  -1  -9  -4  332.97   17.60
  -1  -9  -4  292.47   16.80
   1   9   4  284.97   16.70
   1   9   4  295.17   16.70
   1   9   4  254.97   16.60
  -2  -9  -4   32.90    3.60
  -2  -9  -4   28.80    3.50
   2   9   4   26.00    3.30
   2   9   4   27.60    3.50
  -3  -9  -4  171.28   10.10
  -3  -9  -4  147.99   10.40
   3   9   4  134.79   10.10
  -4  -9  -4  114.49    7.90
  -4  -9  -4  106.79    8.40
   4   9   4   88.79    7.80
  -5  -9  -4   30.50    5.30
   5   9   4   32.60    4.80
  -6  -9  -4   47.70    6.90
   6   9   4   57.69    7.10
  -7  -9  -4   16.10    4.80
   7   9   4   22.00    4.60
  -6  10   4    1.50    1.60
  -5  10   4  113.39    8.50
  -5  10   4  108.69    6.80
  -4  10   4    1.60    2.70
  -4  10   4    3.40    2.00
  -3  10   4  103.59    8.30
  -2  10   4   21.60    1.60
  -2  10   4   21.10    1.70
  -2  10   4   23.30    3.60
   1 -10  -4    0.60    0.50
  -1  10   4    2.10    0.90
  -1  10   4    2.80    1.90
  -1  10   4    1.50    0.90
   0 -10  -4   48.00    3.70
   0 -10  -4   42.90    3.50
   0  10   4   48.80    3.80
   0  10   4   47.00    3.70
   0  10   4   43.80    4.30
  -1 -10  -4   32.10    3.10
  -1 -10  -4   33.40    3.60
   1  10   4   32.10    3.10
   1  10   4   37.90    3.50
   1  10   4   26.10    3.30
  -2 -10  -4   52.29    4.30
  -2 -10  -4   51.09    4.70
   2  10   4   41.10    4.20
   2  10   4   49.50    4.50
  -3 -10  -4  215.08   12.60
  -3 -10  -4  203.48   13.10
   3  10   4  172.98   12.60
  -4 -10  -4    7.50    2.20
  -4 -10  -4    1.90    2.70
   4  10   4    4.00    2.60
  -5 -10  -4   99.89    8.40
   5  10   4   78.49    7.60
  -6 -10  -4    3.70    3.50
   6  10   4    0.90    2.80
  -7 -10  -4   69.69    8.90
   7  10   4   63.39    7.80
  -6  11   4   -0.70    3.40
  -5  11   4    3.80    3.30
  -5  11   4   -0.20    1.90
  -4  11   4   -2.30    1.50
  -4  11   4   -1.50    2.40
  -3  11   4  108.19    8.50
  -2  11   4    0.70    1.80
  -2  11   4    0.20    0.60
  -2  11   4    1.20    0.50
   1 -11  -4  135.79    8.90
  -1  11   4  172.98    9.70
  -1  11   4  184.68   11.10
  -1  11   4  177.18    9.60
   0 -11  -4    2.70    1.70
   0 -11  -4    0.60    1.10
   0  11   4    1.00    1.70
   0  11   4   -1.40    1.00
   0  11   4    1.90    1.20
  -1 -11  -4  296.37   17.70
  -1 -11  -4  303.37   17.40
   1  11   4  305.77   17.50
   1  11   4  297.97   17.80
   1  11   4  292.27   17.70
  -2 -11  -4   27.70    3.80
  -2 -11  -4   32.50    3.50
   2  11   4   34.80    4.10
   2  11   4   26.40    3.70
  -3 -11  -4  113.09    7.70
  -3 -11  -4  105.69    8.30
   3  11   4   99.09    8.10
  -4 -11  -4   39.30    5.50
   4  11   4   33.80    4.90
  -5 -11  -4   10.20    3.90
   5  11   4   12.20    3.50
  -6 -11  -4   18.30    4.60
   6  11   4   20.60    4.40
  -7 -11  -4    9.10    4.70
   7  11   4    5.00    3.70
  -6  12   4    4.70    4.00
  -5  12   4   81.39    9.40
  -5  12   4   79.79    7.30
  -4  12   4   15.30    3.40
  -4  12   4   19.00    4.30
  -3  12   4   41.40    5.60
  -2  12   4   74.19    6.60
  -1  12   4    6.40    1.50
  -1  12   4   11.40    2.70
  -1  12   4    8.20    1.50
   0 -12  -4  131.59    8.50
   0  12   4  133.69    8.90
   0  12   4  134.49    8.70
   0  12   4  147.39    9.30
  -1 -12  -4   20.60    3.00
   1  12   4   25.60    2.80
   1  12   4   26.00    3.40
   1  12   4   21.30    3.10
  -2 -12  -4   93.79    7.00
  -2 -12  -4   93.29    6.20
   2  12   4   79.49    7.00
   2  12   4   85.89    6.90
  -3 -12  -4   29.60    4.40
   3  12   4   43.70    5.30
  -4 -12  -4   26.40    4.50
   4  12   4   23.90    4.20
  -5 -12  -4   68.99    7.90
   5  12   4   76.69    7.40
  -6 -12  -4    0.90    3.60
   6  12   4   -2.20    2.40
  -6  13   4   79.09    9.90
  -5  13   4    1.30    2.40
  -5  13   4   -5.20    2.70
  -4  13   4   28.40    4.70
  -4  13   4   27.60    5.00
  -3  13   4   -2.40    2.10
  -2  13   4   43.40    5.50
  -1  13   4   52.59    5.60
  -1  13   4   50.39    3.80
  -1  13   4   37.50    3.60
   0 -13  -4   -1.60    1.00
   0  13   4   -1.70    1.30
   0  13   4   -1.60    1.30
   0  13   4   -2.10    1.20
  -1 -13  -4   24.20    3.30
   1  13   4   28.90    2.80
   1  13   4   24.80    3.60
   1  13   4   16.10    3.00
  -2 -13  -4   35.30    4.40
   2  13   4   33.60    4.40
   2  13   4   31.70    4.20
  -3 -13  -4   11.70    3.20
   3  13   4   13.50    3.20
  -4 -13  -4   74.19    7.40
   4  13   4   84.59    7.80
  -5 -13  -4    5.30    3.40
   5  13   4   -4.70    2.10
  -6 -13  -4  106.49   10.20
   6  13   4   89.99    9.70
  -5  14   4    3.70    2.80
  -5  14   4    1.30    3.10
  -4  14   4   32.20    5.70
  -4  14   4   31.10    5.10
  -3  14   4   -0.40    2.20
  -2  14   4  119.49    9.30
  -1  14   4   -1.30    1.10
  -1  14   4   -2.70    1.30
  -1  14   4    0.10    1.90
   0  14   4  259.97   16.00
   0  14   4  264.87   16.00
  -1 -14  -4    7.80    2.20
   1  14   4    7.20    2.40
   1  14   4    8.60    1.70
  -2 -14  -4   76.79    6.60
   2  14   4   72.69    6.80
  -3 -14  -4    6.30    2.90
   3  14   4    6.40    2.90
  -4 -14  -4    8.20    3.50
   4  14   4    8.90    3.20
  -5 -14  -4    9.60    4.00
   5  14   4   14.20    4.20
  -6 -14  -4   -4.10    3.10
   6  14   4    3.40    3.30
  -5  15   4   10.10    4.40
  -5  15   4   12.30    3.90
  -4  15   4   65.59    7.90
  -4  15   4   63.19    7.20
  -3  15   4   15.50    4.20
  -2  15   4   17.00    1.70
  -2  15   4   21.20    4.10
  -1  15   4   88.89    6.20
  -1  15   4   93.49    7.70
   0  15   4   -2.40    1.50
   0  15   4   -1.80    1.40
   1  15   4   27.50    4.30
   2  15   4   13.60    3.40
  -3 -15  -4   29.30    4.80
   3  15   4   28.80    5.00
  -4 -15  -4   61.89    7.50
   4  15   4   53.09    7.00
  -5 -15  -4   -1.00    3.10
   5  15   4    2.80    3.10
  -5  16   4   35.00    6.00
  -5  16   4   43.20    6.90
  -4  16   4   10.30    4.00
  -4  16   4   16.10    4.50
  -3  16   4   63.49    7.70
  -2  16   4   15.90    4.00
  -2  16   4   14.30    2.00
  -1  16   4    5.60    1.70
  -1  16   4    3.40    2.70
   0  16   4    1.00    1.90
   1  16   4    5.00    2.50
   2  16   4   18.00    3.80
   3  16   4   45.00    6.10
   4  16   4    1.20    2.70
   5  16   4   37.80    6.20
  -4  17   4   -1.90    2.60
  -4  17   4    2.20    3.30
  -3  17   4   41.50    6.20
  -3  17   4   32.20    5.90
   0  17   4   -0.70    1.80
   1  17   4   75.59    7.10
   2  17   4    1.90    2.30
   3  17   4   25.90    4.80
   4  17   4    1.80    2.90
  -3  18   4    7.80    4.00
   0  18   4   20.20    3.50
   1  18   4   21.30    4.10
   2  18   4   16.10    3.70
   3  18   4   37.90    6.20
  -1  19   4   25.50    3.50
   1  19   4   17.80    4.00
   2  19   4    3.40    2.90
   1  18  -5    5.10    3.70
   1  18  -5    3.00    3.80
   0  18  -5   57.59    8.10
   0  18  -5   59.59    7.30
  -1  18  -5    1.70    2.70
  -1  18  -5   -3.00    3.50
  -2  18  -5   37.90    7.70
  -2  18  -5   26.10    4.50
   2  17  -5   38.10    6.60
   2  17  -5   52.59    7.70
   1  17  -5   25.30    5.20
   1  17  -5   18.30    5.00
   0  17  -5   14.80    4.40
   0  17  -5    9.00    3.70
  -1  17  -5   23.60    4.30
  -1  17  -5   14.90    5.00
  -2  17  -5    3.20    2.70
  -2  17  -5    2.70    3.80
  -3  17  -5   40.90    7.40
  -3  17  -5   31.30    5.50
   3  16  -5   67.49    7.80
   3  16  -5   55.29    8.00
   2  16  -5    1.40    2.90
   2  16  -5   -0.50    3.40
   1  16  -5   51.29    6.90
   1  16  -5   39.50    6.40
   0  16  -5   14.50    4.00
   0  16  -5    4.90    3.50
  -1  16  -5    1.30    3.10
  -1  16  -5    8.90    3.00
  -2  16  -5    2.50    3.30
  -2  16  -5    2.80    2.50
  -3  16  -5    5.90    4.20
  -3  16  -5    8.40    2.40
  -4  16  -5   -0.40    3.50
   4  15  -5   -1.10    2.70
   4  15  -5   -0.10    3.60
   3  15  -5    1.90    3.40
   3  15  -5    0.30    2.80
   2  15  -5   -2.20    2.60
   2  15  -5   -1.40    2.90
   1  15  -5   72.59    7.90
   1  15  -5   51.49    7.10
   0  15  -5    0.50    2.60
   0  15  -5   -1.00    2.40
  -1  15  -5  158.98   12.40
  -1  15  -5  141.29   10.50
  -2  15  -5    0.90    2.30
  -2  15  -5    3.30    3.10
  -3  15  -5   80.49    6.20
  -4  15  -5   -1.30    3.40
  -4  15  -5    0.60    2.20
  -5  15  -5   24.30    5.80
   4  14  -5    8.70    3.50
   4  14  -5   15.00    4.80
  -4 -14   5    9.50    4.50
   3  14  -5   45.40    6.10
   3  14  -5   50.89    7.10
  -3 -14   5   53.79    7.20
   2  14  -5   22.60    4.40
   2  14  -5   17.40    4.20
  -2 -14   5   17.60    4.20
   1  14  -5   50.29    6.80
   1  14  -5   44.30    6.20
   0  14  -5   59.09    6.50
   0  14  -5   60.09    7.50
  -1  14  -5   -0.50    2.50
  -1  14  -5   -0.10    2.00
  -2  14  -5   85.89    8.60
  -2  14  -5   90.39    7.20
  -3  14  -5   15.00    2.70
  -3  14  -5   11.80    4.30
  -4  14  -5   27.10    5.80
  -4  14  -5   31.60    3.50
  -5  14  -5   24.80    5.70
   5  13  -5    4.90    3.80
  -5 -13   5    7.50    4.70
   4  13  -5   90.19    8.30
   4  13  -5  109.99    9.40
  -4 -13   5  109.59   11.20
   3  13  -5   -3.40    2.30
   3  13  -5    4.50    3.40
  -3 -13   5    4.10    3.40
   2  13  -5  167.98   12.70
   2  13  -5  177.58   12.90
  -2 -13   5  192.18   13.20
   1  13  -5   23.00    4.50
   1  13  -5   32.90    5.00
  -1 -13   5   29.40    5.00
   0  13  -5   62.69    5.80
   0  13  -5   55.09    6.80
   0 -13   5   47.70    6.00
  -1  13  -5   25.30    3.80
  -1  13  -5   17.90    4.20
  -2  13  -5    3.10    2.20
  -2  13  -5    0.90    2.60
  -3  13  -5    8.10    2.30
  -3  13  -5   12.50    4.20
  -4  13  -5   47.30    4.30
  -4  13  -5   51.19    7.00
  -5  13  -5    6.40    3.60
  -5  13  -5    2.20    1.60
  -6  13  -5   15.00    4.80
   5  12  -5   -0.10    3.30
  -5 -12   5   -1.50    3.20
   4  12  -5   10.50    3.90
   4  12  -5    9.80    3.20
  -4 -12   5    1.60    3.60
   3  12  -5   -1.50    2.30
   3  12  -5   -0.20    2.30
  -3 -12   5    4.30    3.20
   2  12  -5   46.40    6.00
   2  12  -5   38.20    5.50
  -2 -12   5   47.40    5.90
   1  12  -5    3.80    2.60
   1  12  -5   10.90    3.30
  -1 -12   5    8.40    3.20
   0  12  -5   81.89    6.70
   0  12  -5   76.89    7.30
   0  12  -5   87.99    7.10
   0 -12   5   89.69    7.20
  -1  12  -5    8.00    2.20
  -1  12  -5   10.00    1.70
  -1  12  -5   14.90    3.50
  -1  12  -5   12.80    2.90
   1 -12   5    9.80    2.70
  -2  12  -5  103.49    7.40
  -2  12  -5   92.49    8.40
  -2  12  -5   91.69    6.80
  -3  12  -5   -1.40    1.50
  -3  12  -5   -0.50    2.60
  -4  12  -5   70.59    5.40
  -4  12  -5   71.09    8.40
  -5  12  -5   -0.50    3.00
  -5  12  -5    0.30    1.40
  -6  12  -5   10.60    4.30
   6  11  -5   29.20    6.10
  -6 -11   5   27.70    6.40
   5  11  -5   -1.80    3.10
  -5 -11   5   -2.10    3.40
   4  11  -5  117.49   10.20
   4  11  -5  129.39    9.40
  -4 -11   5  129.99   10.90
   3  11  -5    2.20    2.80
   3  11  -5    4.90    2.50
  -3 -11   5    6.40    3.30
   2  11  -5   78.79    7.10
   2  11  -5   86.59    7.70
  -2 -11   5   99.39    8.10
   1  11  -5   29.30    4.40
   1  11  -5   23.50    4.00
   1  11  -5   27.40    4.10
  -1 -11   5   31.40    4.60
   0  11  -5   17.60    3.10
   0  11  -5   20.00    3.40
   0  11  -5   21.80    3.90
   0 -11   5   21.40    3.80
  -1  11  -5   74.69    5.40
  -1  11  -5   85.29    7.30
  -1  11  -5   84.79    6.50
  -1  11  -5   81.89    6.20
   1 -11   5   77.09    6.30
  -2  11  -5   23.50    3.20
  -2  11  -5   28.20    3.80
  -2  11  -5   21.50    4.40
  -2  11  -5   22.20    3.00
   2 -11   5   28.70    3.10
  -3  11  -5   44.10    6.10
  -3  11  -5   42.60    4.40
  -4  11  -5  105.59    7.10
  -4  11  -5   93.89    8.90
  -5  11  -5    4.10    3.70
  -5  11  -5    5.90    1.90
  -6  11  -5   65.39    8.40
  -6  11  -5   75.69    5.90
   6  10  -5   11.30    4.20
  -6 -10   5   19.70    5.60
   5  10  -5   79.19    8.70
  -5 -10   5   60.19    8.00
   4  10  -5   -1.50    1.80
   4  10  -5    0.60    2.70
  -4 -10   5   -1.10    2.80
   3  10  -5  119.89    9.60
   3  10  -5  125.09    9.10
  -3 -10   5  133.89   10.30
   2  10  -5   27.40    4.00
   2  10  -5   24.00    4.30
  -2 -10   5   40.80    5.30
   1  10  -5   77.99    6.50
   1  10  -5   71.79    6.20
   1  10  -5   71.59    6.30
  -1 -10   5   78.39    6.70
   0  10  -5   60.09    5.30
   0  10  -5   68.79    5.60
   0  10  -5   61.19    6.00
   0  10  -5   62.19    3.90
   0 -10   5   68.59    5.80
  -1  10  -5   -1.00    0.90
  -1  10  -5    0.90    1.40
  -1  10  -5   -2.20    1.70
  -1  10  -5   -1.80    1.40
   1 -10   5    0.20    1.60
  -2  10  -5   48.30    4.30
  -2  10  -5   50.99    4.80
  -2  10  -5   43.90    4.00
  -2  10  -5   50.09    5.90
   2 -10   5   52.89    4.20
  -3  10  -5   30.20    3.60
  -3  10  -5   25.50    4.50
  -3  10  -5   24.00    3.20
   3 -10   5   29.20    2.60
  -4  10  -5   16.10    4.00
  -4  10  -5   34.40    3.50
  -5  10  -5   71.19    5.60
  -5  10  -5   72.69    8.40
  -6  10  -5    1.50    1.80
  -6  10  -5    2.10    3.10
  -7  10  -5   47.20    5.40
  -7  10  -5   61.59    9.80
   6   9  -5   15.60    4.60
  -6  -9   5    4.60    3.50
   5   9  -5    3.00    3.10
  -5  -9   5    5.20    3.30
   4   9  -5    3.20    2.80
   4   9  -5    6.40    2.20
  -4  -9   5    6.10    2.00
  -4  -9   5   -0.90    2.50
   3   9  -5   66.29    7.30
   3   9  -5   72.09    6.10
  -3  -9   5   71.19    5.20
  -3  -9   5   78.39    8.10
   2   9  -5    0.00    1.70
   2   9  -5    0.50    2.10
  -2  -9   5   -0.50    0.70
  -2  -9   5   -1.50    2.00
   1   9  -5  320.97   20.50
   1   9  -5  354.76   20.70
   1   9  -5  341.37   20.50
  -1  -9   5  353.76   20.80
   0   9  -5   13.10    2.60
   0   9  -5   10.40    2.60
   0   9  -5   10.50    2.40
   0   9  -5   12.20    1.60
   0  -9   5    6.70    2.40
  -1   9  -5  279.87   17.90
  -1   9  -5  260.67   16.50
  -1   9  -5  289.67   17.20
  -1   9  -5  303.57   17.30
   1  -9   5  309.37   17.40
  -2   9  -5    0.30    1.10
  -2   9  -5   -0.70    1.60
  -2   9  -5   -0.20    1.90
  -2   9  -5   -0.60    1.10
   2  -9   5    0.40    1.20
  -3   9  -5  227.78   12.20
  -3   9  -5  205.68   12.20
  -3   9  -5  185.88   13.10
   3  -9   5  167.88   11.30
  -4   9  -5    7.10    2.00
  -4   9  -5   11.30    2.30
  -4   9  -5    7.30    2.80
  -5   9  -5   48.20    6.70
  -5   9  -5   52.69    4.80
  -6   9  -5   -2.00    2.70
  -6   9  -5    4.00    2.00
  -7   9  -5    1.10    3.40
  -7   9  -5   -0.80    2.00
   7   8  -5   49.20    7.50
  -7  -8   5   35.40    6.80
   6   8  -5    1.60    3.30
  -6  -8   5    4.00    3.60
  -5  -8   5   98.29   10.10
  -5  -8   5   85.89    7.20
   4   8  -5   25.30    3.50
  -4  -8   5   25.30    4.70
  -4  -8   5   27.50    3.80
   3   8  -5  163.08   11.20
   3   8  -5  163.28   10.50
  -3  -8   5  155.58    9.90
  -3  -8   5  147.69   11.20
   2   8  -5   25.90    3.60
   2   8  -5   24.80    3.90
  -2  -8   5   27.40    4.10
  -2  -8   5   27.80    2.60
   1   8  -5  146.39   10.10
   1   8  -5  152.58   10.10
   1   8  -5  143.89   10.00
  -1  -8   5  163.48   10.50
   0   8  -5    1.90    1.90
   0   8  -5    4.00    1.70
   0   8  -5    4.20    1.20
   0   8  -5    5.00    1.80
   0  -8   5    6.00    2.20
  -1   8  -5   -0.70    1.50
  -1   8  -5    0.00    0.90
  -1   8  -5    0.00    1.40
  -1   8  -5   -0.40    1.20
   1  -8   5   -1.80    1.40
  -2   8  -5   22.60    3.00
  -2   8  -5   15.60    3.40
  -2   8  -5   17.70    2.80
  -2   8  -5   15.50    2.40
   2  -8   5   16.90    2.40
  -3   8  -5   30.60    3.40
  -3   8  -5   22.10    3.10
  -3   8  -5   29.00    4.30
  -4   8  -5   12.60    2.40
  -4   8  -5   11.80    2.40
  -4   8  -5   14.90    3.50
   4  -8   5   10.80    1.70
  -5   8  -5  140.79   10.80
  -5   8  -5  129.19    9.00
  -6   8  -5    0.00    2.80
  -6   8  -5    1.50    1.80
  -7   8  -5   94.49    9.20
  -7   8  -5   81.39    7.40
   7   7  -5   54.49    7.80
  -7  -7   5   48.40    7.80
   6   7  -5   78.69    8.70
  -6  -7   5   50.29    7.50
  -6  -7   5   78.39    7.30
  -5  -7   5   -1.30    2.50
  -5  -7   5   -2.00    1.90
   4   7  -5  101.09    7.10
  -4  -7   5  102.89    7.60
  -4  -7   5  105.19    8.90
   3   7  -5   16.80    3.40
   3   7  -5   11.00    2.30
  -3  -7   5   16.40    2.60
  -3  -7   5   13.20    3.30
   2   7  -5  211.58   13.00
   2   7  -5  211.38   13.40
  -2  -7   5  210.68   13.60
  -2  -7   5  206.18   12.50
   1   7  -5   73.89    5.80
   1   7  -5   65.59    5.50
   1   7  -5   76.09    5.70
  -1  -7   5   64.99    4.50
  -1  -7   5   75.59    6.00
   0   7  -5  169.48   10.20
   0   7  -5  145.89    9.30
   0   7  -5  160.38   10.10
   0   7  -5  160.38   10.40
   0  -7   5  149.99   10.20
  -1   7  -5  108.89    7.50
  -1   7  -5  110.79    7.90
  -1   7  -5  108.39    7.00
  -1   7  -5  113.09    7.50
   1  -7   5  109.09    7.60
  -2   7  -5   22.60    2.90
  -2   7  -5   27.60    3.40
  -2   7  -5   30.20    3.30
  -2   7  -5   19.20    3.40
   2  -7   5   25.50    2.80
   2  -7   5   27.80    3.00
  -3   7  -5   73.99    5.50
  -3   7  -5   72.69    5.60
  -3   7  -5   73.59    6.40
   3  -7   5   82.29    5.20
   3  -7   5   69.09    5.30
  -4   7  -5  183.08   12.20
  -4   7  -5  171.28   10.80
  -4   7  -5  157.58   10.50
  -5   7  -5    9.40    2.50
  -5   7  -5    6.80    3.20
  -6   7  -5  123.89    9.40
  -6   7  -5  153.08   11.30
  -7   7  -5    3.60    3.30
  -7   7  -5    2.30    2.40
  -8   7  -5   61.49    7.20
   7   6  -5    6.90    4.00
  -7  -6   5    4.50    3.70
  -7  -6   5    4.30    3.50
   6   6  -5   11.00    3.90
  -6  -6   5   17.00    4.10
  -6  -6   5    7.10    3.40
  -5  -6   5   48.30    6.40
  -5  -6   5   42.20    5.20
   4   6  -5   80.49    5.90
  -4  -6   5   81.09    6.50
  -4  -6   5   89.39    7.50
   3   6  -5   -1.50    1.20
   3   6  -5   -1.20    1.70
  -3  -6   5    0.50    2.10
  -3  -6   5   -2.20    1.10
   2   6  -5  228.08   14.00
   2   6  -5  227.98   13.50
  -2  -6   5  218.78   14.10
  -2  -6   5  214.08   13.20
   1   6  -5    6.70    1.80
   1   6  -5    6.90    2.00
   1   6  -5    6.60    1.90
  -1  -6   5    9.50    2.30
  -1  -6   5    5.30    1.50
   0   6  -5  466.35   28.10
   0   6  -5  487.55   28.00
   0   6  -5  527.15   28.20
   0   6  -5  458.85   27.50
   0  -6   5  511.55   28.30
   0  -6   5  493.65   28.00
  -1   6  -5  212.08   13.10
  -1   6  -5  221.88   13.50
  -1   6  -5  209.98   13.10
  -1   6  -5  221.88   12.80
   1  -6   5  213.58   12.90
   1  -6   5  207.98   13.10
  -2   6  -5  521.95   29.10
  -2   6  -5  534.15   28.60
  -2   6  -5  470.85   28.40
  -2   6  -5  502.85   28.60
   2  -6   5  530.45   28.40
   2  -6   5  447.36   28.10
  -3   6  -5  102.39    7.00
  -3   6  -5  102.49    7.00
  -3   6  -5   98.59    7.80
   3  -6   5  105.29    6.60
   3  -6   5  102.69    6.90
  -4   6  -5  171.68   11.00
  -4   6  -5  175.68   10.90
  -4   6  -5  171.08   12.00
   4  -6   5  173.08   10.50
  -5   6  -5    6.60    2.90
  -5   6  -5    6.70    2.10
  -5   6  -5    7.20    2.20
   5  -6   5    2.50    1.50
  -6   6  -5   29.60    5.20
  -6   6  -5   36.70    4.50
  -7   6  -5    3.90    3.20
  -7   6  -5    0.30    2.30
  -8   6  -5    2.10    2.70
   7   5  -5    0.70    3.30
  -7  -5   5    1.00    3.10
  -7  -5   5    3.40    3.40
   6   5  -5  147.99   11.30
  -6  -5   5  143.69   11.10
  -6  -5   5  143.49   11.60
  -5  -5   5    0.70    2.20
  -5  -5   5   -2.40    2.00
   4   5  -5  267.67   15.30
  -4  -5   5  262.47   16.90
  -4  -5   5  251.87   16.10
   3   5  -5    0.40    2.00
   3   5  -5    0.20    1.10
  -3  -5   5    0.30    1.30
  -3  -5   5    1.30    2.00
   2   5  -5   70.09    6.20
   2   5  -5   87.69    5.90
   2   5  -5   96.99    6.60
  -2  -5   5   83.39    6.70
  -2  -5   5   85.09    5.90
   1   5  -5  260.37   15.70
   1   5  -5  275.07   15.00
   1   5  -5  268.77   15.50
   1   5  -5  263.07   15.70
  -1  -5   5  258.07   15.80
  -1  -5   5  235.88   15.00
  -1  -5   5  258.57   15.60
   0   5  -5  411.56   23.70
   0   5  -5  417.66   24.20
   0   5  -5  442.36   24.30
   0   5  -5  427.46   24.10
   0  -5   5  369.86   23.50
   0  -5   5  462.05   24.40
  -1   5  -5   -0.80    1.40
  -1   5  -5   -0.10    1.30
  -1   5  -5   -1.80    0.90
  -1   5  -5   -0.90    1.30
   1  -5   5    0.90    1.70
   1  -5   5    0.70    1.20
   1  -5   5    1.10    1.50
  -2   5  -5   13.50    2.80
  -2   5  -5   15.90    2.50
  -2   5  -5   17.50    2.60
  -2   5  -5   21.60    2.90
   2  -5   5   21.90    3.10
   2  -5   5   21.90    2.70
   2  -5   5   18.50    2.40
  -3   5  -5   23.90    3.00
  -3   5  -5   24.60    3.00
  -3   5  -5   20.50    3.60
   3  -5   5   20.80    2.70
   3  -5   5   21.00    2.40
  -4   5  -5  314.87   19.00
  -4   5  -5  336.97   20.20
  -4   5  -5  310.47   19.00
   4  -5   5  335.67   18.80
  -5   5  -5   34.80    5.10
  -5   5  -5   37.20    4.30
  -5   5  -5   33.30    4.10
   5  -5   5   34.00    3.70
  -6   5  -5  144.89   10.90
  -6   5  -5  142.29   10.10
  -7   5  -5    2.10    2.90
  -7   5  -5   -3.50    2.10
  -8   5  -5   61.49    7.50
   7   4  -5   29.30    5.20
  -7  -4   5   31.50    6.00
   6   4  -5   17.10    4.00
  -6  -4   5   10.20    4.00
   5   4  -5   51.99    6.20
  -5  -4   5   63.79    7.20
   4   4  -5   26.20    2.50
   4   4  -5   21.10    3.70
  -4  -4   5   21.10    3.80
  -4  -4   5   26.20    3.60
   3   4  -5   59.59    4.20
   3   4  -5   63.69    5.20
  -3  -4   5   55.29    5.30
  -3  -4   5   49.40    4.70
   2   4  -5   70.99    5.00
   2   4  -5   65.89    5.50
   2   4  -5   70.09    5.60
  -2  -4   5   73.89    5.20
  -2  -4   5   70.99    5.80
  -2  -4   5   67.09    5.60
   1   4  -5   82.39    6.10
   1   4  -5   87.39    6.20
   1   4  -5   88.39    5.60
   1   4  -5   91.09    6.00
  -1  -4   5   76.89    5.80
  -1  -4   5   85.79    6.20
  -1  -4   5   87.89    6.40
   0   4  -5   72.99    5.40
   0   4  -5   79.49    5.80
   0   4  -5   87.09    5.90
   0   4  -5   84.09    5.90
   0  -4   5   82.49    5.80
   0  -4   5   82.89    5.50
   0  -4   5   81.99    5.80
   0  -4   5   83.99    6.10
  -1   4  -5   87.39    6.70
  -1   4  -5  101.19    6.60
  -1   4  -5   90.89    6.70
  -1   4  -5  108.79    7.10
   1  -4   5  109.09    7.00
   1  -4   5   95.99    6.80
   1  -4   5  107.69    6.80
  -2   4  -5  216.48   13.40
  -2   4  -5  238.68   13.40
  -2   4  -5  224.28   13.40
  -2   4  -5  192.28   13.70
   2  -4   5  248.48   14.00
   2  -4   5  230.98   13.20
   2  -4   5  209.48   13.30
  -3   4  -5   31.10    3.50
  -3   4  -5   31.10    4.20
  -3   4  -5   38.60    3.80
   3  -4   5   31.60    4.00
   3  -4   5   40.10    3.40
   3  -4   5   35.30    3.20
  -4   4  -5   18.50    2.90
  -4   4  -5   15.70    3.30
  -4   4  -5   19.10    2.80
   4  -4   5   15.50    2.30
  -5   4  -5   61.49    5.90
  -5   4  -5   68.99    6.20
  -5   4  -5   57.49    5.20
   5  -4   5   55.79    4.90
  -6   4  -5    2.90    2.10
  -6   4  -5    2.30    2.40
  -7   4  -5  132.09   10.00
  -7   4  -5  122.19   10.00
  -8   4  -5   -1.10    2.70
   7   3  -5   13.50    5.90
  -7  -3   5   17.90    4.50
   6   3  -5    7.80    3.30
  -6  -3   5   14.90    4.20
   5   3  -5    4.10    2.60
  -5  -3   5    4.60    2.40
   4   3  -5   38.60    4.70
   4   3  -5   29.30    2.40
  -4  -3   5   26.90    4.10
   3   3  -5   99.39    6.30
   3   3  -5  102.49    7.40
  -3  -3   5  105.59    7.70
  -3  -3   5  106.29    7.60
  -3  -3   5   94.99    7.10
   2   3  -5    8.10    2.00
   2   3  -5    9.10    1.60
   2   3  -5    8.30    2.00
  -2  -3   5    9.90    2.40
  -2  -3   5    9.40    2.00
  -2  -3   5    6.20    2.20
   1   3  -5  348.57   20.90
   1   3  -5  362.96   21.00
   1   3  -5  388.56   20.60
   1   3  -5  371.76   20.70
  -1  -3   5  325.07   20.60
  -1  -3   5  366.36   20.60
  -1  -3   5  363.96   21.00
   0   3  -5   26.80    3.00
   0   3  -5   23.00    3.00
   0   3  -5   25.50    2.90
   0   3  -5   19.60    2.60
   0  -3   5   22.10    2.70
   0  -3   5   25.60    3.00
   0  -3   5   25.20    2.90
   0  -3   5   19.00    2.80
  -1   3  -5 1512.65   82.09
  -1   3  -5 1463.15   82.39
  -1   3  -5 1489.55   82.29
  -1   3  -5 1550.74   82.29
   1  -3   5 1534.85   82.49
   1  -3   5 1497.65   82.19
   1  -3   5 1400.86   82.19
  -2   3  -5   10.90    2.10
  -2   3  -5   11.10    2.40
  -2   3  -5   12.70    2.30
  -2   3  -5    9.90    2.00
   2  -3   5   12.80    2.20
   2  -3   5   13.60    2.00
   2  -3   5   15.20    2.70
  -3   3  -5  451.75   24.80
  -3   3  -5  431.56   25.60
  -3   3  -5  429.16   24.80
   3  -3   5  406.66   25.20
   3  -3   5  445.86   24.70
   3  -3   5  437.16   24.60
  -4   3  -5   53.89    4.50
  -4   3  -5   48.60    4.50
  -4   3  -5   52.89    5.60
   4  -3   5   50.09    4.20
   4  -3   5   42.60    4.90
  -5   3  -5   31.20    4.50
  -5   3  -5   38.20    4.50
  -5   3  -5   35.10    4.20
   5  -3   5   30.00    3.60
  -6   3  -5   52.59    5.80
  -6   3  -5   46.10    5.50
   6  -3   5   42.50    4.90
  -7   3  -5   10.50    3.30
  -8   3  -5    5.40    3.40
  -7  -2   5   53.79    7.10
   6   2  -5    3.70    2.50
  -6  -2   5    7.70    3.30
   5   2  -5  172.38   11.60
  -5  -2   5  165.48   11.90
   4   2  -5    1.90    1.90
  -4  -2   5    0.50    1.90
   3   2  -5  457.25   25.10
   3   2  -5  438.76   24.10
  -3  -2   5  440.26   25.20
  -3  -2   5  410.76   25.10
  -3  -2   5  408.56   25.20
   2   2  -5   10.30    1.60
   2   2  -5   12.50    2.20
   2   2  -5    8.10    2.10
  -2  -2   5    9.70    2.30
  -2  -2   5   10.00    2.30
  -2  -2   5    9.40    2.10
   1   2  -5  287.57   15.80
   1   2  -5  277.27   16.00
   1   2  -5  255.87   15.90
   1   2  -5  260.27   15.70
  -1  -2   5  275.17   15.60
  -1  -2   5  248.68   16.00
  -1  -2   5  276.17   16.00
  -1  -2   5  285.97   16.00
   0   2  -5    4.50    1.70
   0   2  -5    4.00    1.70
   0   2  -5    5.30    1.70
   0   2  -5    3.80    1.70
   0  -2   5    3.10    1.70
   0  -2   5    3.90    1.60
   0  -2   5    3.60    1.60
   0  -2   5    5.20    1.80
  -1   2  -5    6.10    2.00
  -1   2  -5    6.00    1.90
  -1   2  -5    5.80    1.70
  -1   2  -5    3.60    1.90
   1  -2   5    2.30    1.80
   1  -2   5    5.80    1.80
   1  -2   5    4.00    1.70
   1  -2   5    4.80    1.60
  -2   2  -5   12.20    2.10
  -2   2  -5   17.50    2.50
  -2   2  -5   10.80    2.40
  -2   2  -5   11.60    2.00
   2  -2   5   10.40    2.40
   2  -2   5   11.60    2.00
   2  -2   5   18.60    2.30
  -3   2  -5  135.39    8.90
  -3   2  -5  124.69    9.30
  -3   2  -5  145.59    8.80
   3  -2   5  138.79    8.70
   3  -2   5  149.19    8.80
   3  -2   5  133.29    9.30
  -4   2  -5    6.00    2.00
  -4   2  -5    3.70    1.80
  -4   2  -5    5.80    1.90
   4  -2   5    5.60    1.80
   4  -2   5    5.30    2.20
  -5   2  -5  327.57   18.80
  -5   2  -5  291.57   18.40
  -5   2  -5  309.27   18.40
   5  -2   5  308.57   18.20
   5  -2   5  283.47   18.50
  -6   2  -5    6.30    2.90
  -6   2  -5    4.70    2.40
  -6   2  -5    4.50    2.40
   6  -2   5   -1.50    1.80
  -7   2  -5  123.09   10.00
  -8   2  -5   -1.40    2.80
  -7  -1   5   13.30    3.90
   6   1  -5   57.69    6.70
  -6  -1   5   68.39    7.60
   5   1  -5    1.80    2.10
  -5  -1   5    2.60    2.20
   4   1  -5   48.00    5.00
  -4  -1   5   51.49    5.40
  -4  -1   5   43.70    5.10
   3   1  -5   89.49    5.60
   3   1  -5  108.09    7.10
  -3  -1   5   98.39    7.10
  -3  -1   5   99.29    7.20
  -3  -1   5  112.59    7.30
   2   1  -5   11.60    1.60
   2   1  -5   14.00    2.40
   2   1  -5   10.40    2.00
  -2  -1   5    7.60    2.10
  -2  -1   5   10.00    2.20
  -2  -1   5   13.80    2.40
   1   1  -5  976.50   56.79
   1   1  -5 1036.70   57.09
   1   1  -5 1030.00   57.09
   1   1  -5 1007.00   57.09
  -1  -1   5 1090.69   56.79
  -1  -1   5 1069.79   57.19
  -1  -1   5 1014.40   57.09
  -1  -1   5 1024.20   57.19
   0   1  -5    4.20    1.60
   0   1  -5    7.20    1.90
   0   1  -5    5.00    1.80
   0   1  -5    9.30    2.00
   0  -1   5    7.00    1.80
   0  -1   5    5.40    1.70
   0  -1   5    6.20    1.90
   0  -1   5    8.80    1.90
  -1   1  -5  593.04   32.30
  -1   1  -5  611.24   32.40
  -1   1  -5  566.04   32.30
  -1   1  -5  534.95   32.40
   1  -1   5  580.04   32.30
   1  -1   5  586.74   32.60
   1  -1   5  545.95   32.20
   1  -1   5  579.34   32.40
  -2   1  -5    3.80    1.50
  -2   1  -5    4.20    1.70
  -2   1  -5    7.50    1.70
  -2   1  -5    7.00    2.10
   2  -1   5    5.00    2.10
   2  -1   5    4.00    1.40
   2  -1   5    4.50    1.50
  -3   1  -5  154.38   10.80
  -3   1  -5  156.58   10.30
  -3   1  -5  171.58   10.40
   3  -1   5  179.18   11.10
   3  -1   5  170.18   10.20
   3  -1   5  166.68   10.20
  -4   1  -5   92.29    7.10
  -4   1  -5   92.99    7.10
  -4   1  -5  100.09    7.00
   4  -1   5  103.99    7.50
   4  -1   5  101.59    6.90
  -5   1  -5   31.30    4.10
  -5   1  -5   39.70    4.40
   5  -1   5   30.00    4.20
   5  -1   5   29.20    3.80
  -6   1  -5  131.89    9.90
  -6   1  -5  129.19    9.60
   6  -1   5  116.79    9.20
  -8   1  -5   30.80    5.60
  -7   0   5   11.60    4.00
   6   0  -5    0.80    2.10
  -6   0   5   19.00    3.80
   5   0  -5   54.39    5.40
  -5   0   5   61.99    6.50
   4   0  -5   15.70    2.80
  -4   0   5   11.30    2.60
  -4   0   5   10.70    2.50
   3   0  -5  114.29    7.50
  -3   0   5  116.29    7.60
  -3   0   5  103.09    7.60
  -3   0   5  101.89    7.70
   2   0  -5   76.09    5.10
   2   0  -5   68.89    4.90
   2   0  -5   65.09    4.20
  -2   0   5   65.99    5.20
  -2   0   5   61.79    4.20
  -2   0   5   67.19    5.30
   1   0  -5    3.50    1.60
   1   0  -5    3.30    1.50
   1   0  -5    1.50    1.20
   1   0  -5    3.30    1.40
  -1   0   5    3.00    1.50
  -1   0   5    0.70    1.20
  -1   0   5    1.20    1.70
  -1   0   5    1.60    1.50
   0   0  -5 1294.37   72.09
   0   0  -5 1420.16   72.39
   0   0  -5 1276.77   72.09
   0   0  -5 1293.37   72.09
   0   0   5 1260.97   72.09
   0   0   5 1286.27   72.19
   0   0   5 1329.67   72.19
   0   0   5 1304.67   72.09
  -1   0  -5    0.90    1.50
  -1   0  -5    0.20    1.30
  -1   0  -5    1.10    1.40
  -1   0  -5   -1.10    1.60
   1   0   5    1.00    1.50
   1   0   5   -0.50    1.40
   1   0   5    1.10    1.20
   1   0   5    0.30    1.40
  -2   0  -5  508.15   28.10
  -2   0  -5  545.85   28.50
  -2   0  -5  512.55   28.10
  -2   0  -5  430.06   28.30
   2   0   5  507.85   28.00
   2   0   5  454.95   28.40
   2   0   5  518.35   28.00
  -3   0  -5   18.30    2.80
  -3   0  -5   17.00    2.80
  -3   0  -5   20.40    2.90
  -3   0  -5   18.80    2.60
   3   0   5   14.50    2.90
   3   0   5   18.80    2.40
   3   0   5   16.00    2.40
  -4   0  -5  201.28   12.80
  -4   0  -5  185.98   12.90
  -4   0  -5  221.38   13.20
   4   0   5  210.78   13.40
   4   0   5  223.58   12.90
  -5   0  -5   11.30    2.70
  -5   0  -5   17.10    3.10
   5   0   5   14.90    3.00
   5   0   5   12.40    2.70
   6   0   5    4.30    2.40
  -7   0  -5   31.70    5.40
   7   0   5   21.40    4.50
  -8   0  -5   47.20    7.00
  -8   1   5   19.20    4.70
  -7   1   5    9.80    3.70
   6  -1  -5  116.59    8.90
  -6   1   5  122.59    9.60
   5  -1  -5   12.60    2.70
  -5   1   5   12.80    3.00
  -5   1   5    3.00    2.40
   4  -1  -5  313.67   18.80
  -4   1   5  317.17   19.00
  -4   1   5  317.07   19.00
   3  -1  -5    9.50    2.00
   3  -1  -5    9.30    2.10
  -3   1   5    9.20    2.20
  -3   1   5    5.20    2.20
  -3   1   5    7.90    2.00
   2  -1  -5  249.68   14.10
   2  -1  -5  254.77   14.30
  -2   1   5  227.78   14.50
  -2   1   5  252.57   14.30
  -2   1   5  220.08   13.50
   1  -1  -5   62.29    4.80
   1  -1  -5   72.19    4.90
   1  -1  -5   72.29    5.00
  -1   1   5   73.79    5.00
  -1   1   5   66.39    5.20
  -1   1   5   68.19    5.00
  -1   1   5   60.09    4.40
   0  -1  -5   53.59    4.10
   0  -1  -5   51.69    4.20
   0  -1  -5   50.69    4.00
   0  -1  -5   44.20    4.00
   0   1   5   45.50    4.10
   0   1   5   53.79    4.60
   0   1   5   50.29    4.00
   0   1   5   48.90    4.00
  -1  -1  -5    2.40    1.80
  -1  -1  -5    5.80    1.90
  -1  -1  -5    3.70    1.90
  -1  -1  -5    7.70    1.80
   1   1   5    3.00    1.60
   1   1   5    2.90    1.70
   1   1   5    3.10    1.60
   1   1   5    4.30    2.00
  -2  -1  -5  138.49    8.70
  -2  -1  -5  116.59    8.70
  -2  -1  -5  139.99    8.60
  -2  -1  -5  143.19    8.90
   2   1   5  134.69    8.50
   2   1   5  125.99    8.40
   2   1   5  163.78    9.20
  -3  -1  -5    3.00    1.70
  -3  -1  -5   -0.70    1.20
  -3  -1  -5    1.10    1.40
   3   1   5    0.30    1.40
   3   1   5   -1.00    1.10
   3   1   5   -1.70    1.40
  -4  -1  -5  294.97   18.50
  -4  -1  -5  294.27   18.70
   4   1   5  324.77   19.00
   4   1   5  338.47   18.70
  -5  -1  -5   21.60    3.80
  -5  -1  -5   17.80    3.10
   5   1   5   11.70    2.80
   5   1   5   13.90    3.10
  -6  -1  -5  293.27   19.10
   6   1   5  307.27   18.80
  -7  -1  -5    2.10    2.80
   7   1   5   -0.40    2.40
  -8  -1  -5  127.09   11.20
  -8   2   5   14.50    4.70
  -7   2   5    6.90    3.20
  -6   2   5   37.10    5.30
   5  -2  -5   36.00    4.30
  -5   2   5   28.00    4.20
  -5   2   5   28.30    4.10
   4  -2  -5   31.40    3.80
  -4   2   5   30.40    3.90
  -4   2   5   36.90    4.20
   3  -2  -5  140.59    9.70
   3  -2  -5  165.08    9.90
  -3   2   5  161.88   10.10
  -3   2   5  168.38   10.70
  -3   2   5  159.18    9.90
   2  -2  -5  342.47   17.80
   2  -2  -5  322.97   17.90
  -2   2   5  288.47   18.30
  -2   2   5  309.37   17.80
  -2   2   5  308.47   17.90
  -2   2   5  284.57   17.30
   1  -2  -5   34.30    3.20
   1  -2  -5   36.10    3.00
   1  -2  -5   36.20    3.30
  -1   2   5   39.80    3.30
  -1   2   5   27.70    2.70
  -1   2   5   36.10    3.30
  -1   2   5   29.00    3.60
   0  -2  -5  952.00   52.39
   0  -2  -5  869.51   52.69
   0  -2  -5 1012.90   52.49
   0   2   5  977.10   52.89
   0   2   5  967.20   52.49
   0   2   5  882.01   52.39
   0   2   5  979.80   52.39
  -1  -2  -5    2.10    1.50
  -1  -2  -5    1.00    1.30
  -1  -2  -5    1.10    1.50
   1   2   5    2.00    1.40
   1   2   5    5.00    1.50
   1   2   5    1.50    1.60
   1   2   5    2.40    1.30
  -2  -2  -5  575.04   35.10
  -2  -2  -5  637.44   35.00
  -2  -2  -5  643.04   34.90
   2   2   5  658.73   35.00
   2   2   5  619.84   34.80
   2   2   5  672.83   35.30
   2   2   5  560.54   35.00
  -3  -2  -5   33.20    3.60
  -3  -2  -5   29.90    3.70
  -3  -2  -5   32.10    3.80
   3   2   5   31.90    3.20
   3   2   5   39.40    3.80
   3   2   5   34.00    3.80
  -4  -2  -5   54.79    5.00
  -4  -2  -5   52.59    5.10
   4   2   5   58.99    5.10
   4   2   5   61.79    5.20
  -5  -2  -5  132.29   10.20
   5   2   5  157.08   10.30
   5   2   5  159.08   10.40
   6   2   5    4.10    2.50
  -7  -2  -5   78.29    8.50
   7   2   5   81.29    7.70
  -8  -2  -5   29.60    5.80
  -7   3   5   18.40    3.90
  -6   3   5   51.69    5.90
   5  -3  -5    1.00    1.60
  -5   3   5    5.90    2.10
  -5   3   5    4.20    2.00
   4  -3  -5   98.59    6.60
  -4   3   5   90.69    6.80
  -4   3   5   86.79    6.60
   3  -3  -5  144.79    8.60
   3  -3  -5  132.49    8.40
  -3   3   5  132.69    8.50
  -3   3   5  133.79    9.40
  -3   3   5  130.09    8.60
   2  -3  -5  153.68    8.80
   2  -3  -5  139.79    9.00
  -2   3   5  149.49    9.10
  -2   3   5  143.09    8.90
  -2   3   5  141.19    9.60
   1  -3  -5  365.46   20.90
   1  -3  -5  373.16   21.40
   1  -3  -5  382.86   20.90
  -1   3   5  370.56   21.10
  -1   3   5  362.96   21.40
  -1   3   5  357.36   21.00
   0  -3  -5    4.90    1.40
   0  -3  -5    3.20    1.40
   0  -3  -5    2.40    1.80
   0   3   5    3.40    1.40
   0   3   5    1.60    1.10
   0   3   5    0.80    1.70
  -1  -3  -5  414.26   22.70
  -1  -3  -5  392.56   22.10
  -1  -3  -5  407.36   22.20
   1   3   5  344.87   22.40
   1   3   5  390.26   22.10
   1   3   5  392.66   22.10
  -2  -3  -5   17.10    2.40
  -2  -3  -5   13.50    2.40
  -2  -3  -5   13.30    2.30
   2   3   5   11.00    1.90
   2   3   5   14.80    2.30
   2   3   5   12.50    2.30
  -3  -3  -5  240.48   15.20
  -3  -3  -5  248.48   15.10
  -3  -3  -5  251.47   15.30
   3   3   5  244.78   15.20
   3   3   5  269.67   15.20
   3   3   5  259.37   15.00
  -4  -3  -5   62.59    5.40
  -4  -3  -5   59.59    5.50
   4   3   5   62.19    5.30
   4   3   5   65.59    5.30
  -5  -3  -5   48.00    5.30
   5   3   5   30.90    4.10
   5   3   5   32.60    4.50
  -6  -3  -5   74.29    7.70
   6   3   5   52.29    6.10
  -7  -3  -5   19.90    4.30
   7   3   5    4.90    2.70
  -8  -3  -5   32.70    6.60
  -7   4   5   96.79    8.70
  -6   4   5    8.30    2.90
   5  -4  -5  174.28   11.10
  -5   4   5  171.78   11.40
  -5   4   5  179.48   11.60
   4  -4  -5   20.30    2.70
  -4   4   5   19.70    2.80
  -4   4   5   17.70    1.80
  -4   4   5   15.70    2.70
   3  -4  -5  140.79    8.40
   3  -4  -5  137.49    8.60
  -3   4   5  136.39    8.70
  -3   4   5  123.99    9.40
  -3   4   5  139.69    8.50
   2  -4  -5   32.40    2.70
   2  -4  -5   34.10    3.20
  -2   4   5   32.90    3.30
  -2   4   5   30.80    2.80
  -2   4   5   37.00    4.20
   1  -4  -5   23.50    3.10
   1  -4  -5   24.00    2.40
   1  -4  -5   21.60    2.40
  -1   4   5   31.20    2.90
  -1   4   5   26.10    3.50
  -1   4   5   24.60    2.70
   0  -4  -5    0.30    1.30
   0  -4  -5    0.50    1.20
   0  -4  -5    1.70    1.30
   0   4   5    0.30    1.70
   0   4   5   -0.70    1.00
   0   4   5    1.40    1.10
  -1  -4  -5   12.60    2.40
  -1  -4  -5   17.00    2.30
  -1  -4  -5   16.20    2.20
   1   4   5   13.70    2.50
   1   4   5   15.60    2.10
   1   4   5   17.90    2.20
  -2  -4  -5   11.70    2.30
  -2  -4  -5   10.60    2.10
  -2  -4  -5   10.00    2.20
   2   4   5   10.90    1.90
   2   4   5   13.40    2.10
   2   4   5   12.40    2.40
  -3  -4  -5  281.37   15.70
  -3  -4  -5  234.68   15.30
  -3  -4  -5  248.38   15.20
   3   4   5  259.57   15.30
   3   4   5  249.48   15.10
  -4  -4  -5    0.60    1.90
   4   4   5    1.90    1.40
   4   4   5    5.80    2.10
  -5  -4  -5  362.46   22.30
   5   4   5  367.56   22.10
  -6  -4  -5    4.90    2.90
   6   4   5    0.50    2.20
  -7  -4  -5  163.08   12.50
   7   4   5  159.58   12.20
  -8  -4  -5   -0.20    3.50
  -7   5   5    9.90    3.30
  -6   5   5   13.80    3.30
   5  -5  -5   -0.80    1.30
  -5   5   5    2.60    1.90
  -5   5   5    1.00    1.70
   4  -5  -5    5.00    1.70
  -4   5   5    5.10    1.30
  -4   5   5    4.10    1.70
  -4   5   5    2.30    1.50
   3  -5  -5   15.10    1.80
  -3   5   5   10.40    2.80
  -3   5   5   14.60    2.00
  -3   5   5   10.10    1.90
   2  -5  -5   21.60    2.00
  -2   5   5   20.50    2.40
  -2   5   5   19.00    2.20
  -2   5   5   28.00    3.60
   1  -5  -5  154.68    9.40
   1  -5  -5  161.68   10.10
   1  -5  -5  151.78    9.20
  -1   5   5  165.18    9.60
  -1   5   5  152.18    9.50
  -1   5   5  173.78   10.50
   0  -5  -5  159.98    9.60
   0  -5  -5  145.19    9.60
   0  -5  -5  164.38   10.30
   0   5   5  166.18   10.50
   0   5   5  171.38    9.70
   0   5   5  166.28    9.70
  -1  -5  -5  932.01   48.60
  -1  -5  -5  825.02   49.10
  -1  -5  -5  891.31   48.60
   1   5   5  885.31   48.60
   1   5   5  823.02   48.90
   1   5   5  900.41   48.50
  -2  -5  -5   27.80    3.30
  -2  -5  -5   27.30    3.10
  -2  -5  -5   22.10    3.00
   2   5   5   35.20    3.70
   2   5   5   29.00    3.10
   2   5   5   34.70    3.40
  -3  -5  -5  363.86   20.60
  -3  -5  -5  322.17   20.50
  -3  -5  -5  334.27   20.60
   3   5   5  363.86   20.50
   3   5   5  365.06   20.50
  -4  -5  -5   50.89    5.50
   4   5   5   52.39    4.80
   5   5   5   28.80    4.20
  -6  -5  -5   88.19    7.80
   6   5   5   78.29    7.30
  -7  -5  -5   26.10    4.80
   7   5   5   10.80    3.80
  -8  -5  -5    8.90    4.40
   8   5   5   17.50    4.60
  -7   6   5   65.09    7.20
  -6   6   5    3.20    2.20
  -5   6   5   88.59    7.30
  -5   6   5  114.59    6.80
   4  -6  -5   28.70    2.80
  -4   6   5   36.20    3.40
  -4   6   5   36.20    3.50
  -4   6   5   32.20    3.00
   3  -6  -5  101.19    6.20
   3  -6  -5  101.99    6.00
  -3   6   5   99.49    7.80
  -3   6   5   98.99    6.30
  -3   6   5   96.99    6.60
   2  -6  -5  451.05   24.20
   2  -6  -5  437.06   24.20
  -2   6   5  442.66   24.70
  -2   6   5  436.56   24.50
  -2   6   5  418.96   25.60
   1  -6  -5    4.40    1.10
  -1   6   5    4.40    2.00
  -1   6   5    6.00    1.30
  -1   6   5    4.60    1.30
   0  -6  -5  737.83   45.80
   0  -6  -5  837.32   45.20
   0  -6  -5  823.12   45.30
   0   6   5  817.82   45.30
   0   6   5  837.12   46.10
   0   6   5  863.91   45.30
  -1  -6  -5  116.99    8.50
  -1  -6  -5  136.29    8.10
  -1  -6  -5  130.79    8.10
   1   6   5  130.59    8.10
   1   6   5  120.49    8.40
   1   6   5  130.89    8.00
  -2  -6  -5  420.46   24.90
  -2  -6  -5  463.85   25.40
  -2  -6  -5  444.66   25.10
   2   6   5  426.06   25.00
   2   6   5  412.16   24.90
   2   6   5  455.95   25.00
  -3  -6  -5   97.79    7.00
  -3  -6  -5   90.59    7.00
   3   6   5   92.89    6.80
   3   6   5  104.99    7.00
  -4  -6  -5  134.59    9.90
   4   6   5  144.59    9.70
  -5  -6  -5   77.89    7.30
   5   6   5   74.89    6.70
  -6  -6  -5    1.50    2.50
   6   6   5   -0.30    2.30
  -7  -6  -5   38.60    6.10
   7   6   5   38.70    5.80
  -8  -6  -5   19.10    5.70
   8   6   5   13.40    4.30
  -7   7   5    7.40    2.90
  -6   7   5  103.09    8.00
  -5   7   5    4.20    1.80
  -5   7   5    6.90    1.90
   4  -7  -5  155.18    9.10
  -4   7   5  171.28   10.00
  -4   7   5  151.68   11.50
  -4   7   5  158.58    9.70
  -4   7   5  155.28    9.90
   3  -7  -5   15.90    1.20
   3  -7  -5   18.60    1.30
  -3   7   5   16.30    2.10
  -3   7   5   10.10    2.90
  -3   7   5   16.00    1.90
   2  -7  -5   31.10    1.80
   2  -7  -5   27.20    1.80
  -2   7   5   24.00    2.40
  -2   7   5   24.50    2.30
  -2   7   5   27.90    3.80
   1  -7  -5   78.69    4.60
   1  -7  -5   72.99    4.80
  -1   7   5   77.79    6.00
  -1   7   5   69.39    4.80
  -1   7   5   73.79    4.80
   0  -7  -5    8.40    1.60
   0  -7  -5   11.10    2.20
   0  -7  -5   12.30    1.80
   0   7   5    8.20    1.60
   0   7   5   13.10    2.60
   0   7   5   11.50    1.70
  -1  -7  -5  130.09    9.30
  -1  -7  -5  142.89    9.00
  -1  -7  -5  153.48    9.10
   1   7   5  153.18    9.10
   1   7   5  148.89    9.00
   1   7   5  139.19    9.30
  -2  -7  -5   10.00    2.20
  -2  -7  -5   15.90    2.70
   2   7   5   16.60    2.40
   2   7   5   11.60    2.20
   2   7   5   10.20    2.10
  -3  -7  -5   42.20    4.10
  -3  -7  -5   39.60    4.50
   3   7   5   42.20    4.40
   3   7   5   35.10    4.10
  -4  -7  -5  166.38   11.70
   4   7   5  173.28   11.50
  -5  -7  -5    9.50    3.10
   5   7   5    5.20    2.60
  -6  -7  -5  144.29   11.20
   6   7   5  127.39   10.60
  -7  -7  -5    1.50    3.20
   7   7   5   -1.00    2.80
  -8  -7  -5   67.99    8.90
   8   7   5   31.90    5.80
  -7   8   5    6.10    2.70
  -6   8   5   -0.20    1.60
  -5   8   5    7.80    2.30
  -5   8   5   10.00    2.10
  -4   8   5   28.40    3.40
  -4   8   5   26.70    5.00
  -4   8   5   27.40    2.70
  -4   8   5   30.80    3.10
  -3   8   5   -0.40    0.70
  -3   8   5   -0.40    0.90
  -3   8   5   -1.40    1.80
  -2   8   5  180.08   10.40
  -2   8   5  181.18   10.30
  -2   8   5  174.08   11.80
   1  -8  -5   31.80    2.40
   1  -8  -5   36.50    2.70
  -1   8   5   36.50    2.80
  -1   8   5   41.30    4.60
  -1   8   5   38.70    2.80
   0  -8  -5  305.27   18.00
   0  -8  -5  314.47   18.60
   0  -8  -5  338.57   18.20
   0   8   5  297.87   18.90
   0   8   5  330.57   18.20
   0   8   5  313.77   18.10
  -1  -8  -5  118.89    7.90
  -1  -8  -5  126.49    8.00
  -1  -8  -5  116.19    8.20
   1   8   5  125.99    8.20
   1   8   5  123.09    7.90
   1   8   5  126.29    7.90
  -2  -8  -5  416.86   24.00
  -2  -8  -5  400.16   23.70
   2   8   5  385.66   23.50
   2   8   5  436.16   23.70
   2   8   5  409.56   23.70
  -3  -8  -5   74.89    6.50
  -3  -8  -5   89.09    6.50
   3   8   5   87.39    6.60
  -4  -8  -5   85.89    7.10
   4   8   5   70.59    6.40
  -5  -8  -5  131.39    9.80
   5   8   5  106.79    9.00
  -6  -8  -5    0.10    2.70
   6   8   5   -2.90    2.40
  -7  -8  -5   20.80    5.30
   7   8   5   22.30    5.10
  -7   9   5    6.90    2.60
  -7   9   5   -0.40    3.80
  -6   9   5   36.40    4.10
  -6   9   5   34.40    6.50
  -5   9   5    1.70    1.80
  -5   9   5    1.70    1.50
  -5   9   5    4.10    3.20
  -4   9   5   50.79    4.70
  -4   9   5   61.99    7.20
  -4   9   5   52.99    3.90
  -4   9   5   49.80    3.70
  -3   9   5  220.48   12.20
  -3   9   5  217.18   14.20
  -3   9   5  205.78   12.10
  -2   9   5  112.19    6.40
  -2   9   5  103.29    6.50
  -2   9   5  109.49    8.10
   1  -9  -5  227.38   12.50
   1  -9  -5  207.68   12.30
  -1   9   5  229.08   14.00
  -1   9   5  211.88   12.60
  -1   9   5  226.68   12.70
   0  -9  -5    8.60    1.60
   0  -9  -5   11.40    2.10
   0  -9  -5   13.20    1.90
   0   9   5    6.20    2.20
   0   9   5    9.40    1.70
   0   9   5    9.60    1.80
  -1  -9  -5  256.47   16.10
  -1  -9  -5  281.97   16.40
   1   9   5  263.67   16.30
   1   9   5  269.37   16.20
   1   9   5  298.47   16.20
  -2  -9  -5   26.60    3.50
  -2  -9  -5   23.10    3.40
   2   9   5   27.70    3.10
   2   9   5   29.70    3.40
   2   9   5   24.30    3.20
  -3  -9  -5  126.39    9.30
  -3  -9  -5  145.29    9.10
   3   9   5  117.99    9.00
  -4  -9  -5  104.99    8.30
   4   9   5   98.39    8.00
  -5  -9  -5    2.90    2.70
   5   9   5    2.50    2.50
  -6  -9  -5   68.29    8.10
   6   9   5   69.39    7.70
  -7  -9  -5    6.40    4.10
   7   9   5    7.00    3.60
  -7  10   5   27.30    6.80
  -6  10   5   -0.30    3.30
  -6  10   5    0.70    1.60
  -5  10   5  125.09    8.70
  -5  10   5  113.79   10.20
  -5  10   5  112.49    7.40
  -4  10   5   -2.10    2.80
  -4  10   5    2.30    0.90
  -4  10   5    3.90    2.00
  -4  10   5    3.80    0.90
  -3  10   5  100.99    5.70
  -3  10   5   97.99    5.60
  -3  10   5   96.99    8.00
  -2  10   5   37.60    2.90
  -2  10   5   48.70    5.40
  -2  10   5   41.40    2.80
   1 -10  -5   37.30    2.60
   1 -10  -5   33.50    2.40
  -1  10   5   37.70    3.00
  -1  10   5   49.50    5.20
  -1  10   5   40.50    3.00
   0 -10  -5   44.90    3.60
   0 -10  -5   45.90    3.70
   0  10   5   45.80    4.60
   0  10   5   49.40    3.80
   0  10   5   48.50    3.80
  -1 -10  -5   37.10    3.80
  -1 -10  -5   33.30    3.60
   1  10   5   44.20    3.90
   1  10   5   39.10    3.70
   1  10   5   37.80    3.90
  -2 -10  -5   11.60    2.40
  -2 -10  -5   11.30    2.50
   2  10   5   11.00    2.50
   2  10   5   13.30    2.70
   2  10   5   12.80    2.20
  -3 -10  -5   29.00    3.70
  -3 -10  -5   27.10    4.00
   3  10   5   27.90    4.00
  -4 -10  -5   -0.10    1.80
  -4 -10  -5    0.90    2.20
   4  10   5    1.10    1.90
  -5 -10  -5  179.08   12.80
   5  10   5  161.08   12.20
  -6 -10  -5    2.00    3.60
   6  10   5   -0.40    2.50
  -7 -10  -5  117.09   12.00
   7  10   5   90.69    9.10
  -6  11   5    1.30    4.20
  -5  11   5   14.60    3.00
  -5  11   5   18.00    4.50
  -4  11   5   -1.20    2.50
  -4  11   5   -1.30    1.60
  -3  11   5   64.29    6.30
  -2  11   5    0.60    0.80
  -2  11   5    0.80    2.00
  -2  11   5    0.30    0.60
   1 -11  -5  261.37   15.60
   1 -11  -5  297.07   15.80
  -1  11   5  293.67   17.60
  -1  11   5  283.77   16.20
  -1  11   5  281.27   16.20
   0 -11  -5   13.90    2.00
   0  11   5   13.40    2.90
   0  11   5   14.30    2.20
   0  11   5   12.50    2.10
  -1 -11  -5  217.28   14.10
  -1 -11  -5  242.98   14.20
   1  11   5  247.98   14.30
   1  11   5  235.98   14.30
   1  11   5  229.58   14.20
  -2 -11  -5    4.40    1.80
  -2 -11  -5    4.50    2.00
   2  11   5    0.20    1.70
   2  11   5    3.00    1.40
   2  11   5    2.40    1.70
  -3 -11  -5  125.59    9.10
  -3 -11  -5  129.19    8.60
   3  11   5  101.79    8.50
  -4 -11  -5   -2.20    2.20
   4  11   5    3.40    2.60
  -5 -11  -5    8.30    3.70
   5  11   5    5.40    2.80
  -6 -11  -5    9.20    3.90
   6  11   5    5.10    3.20
  -7 -11  -5   23.50    5.60
   7  11   5   16.70    4.80
  -6  12   5    0.80    3.90
  -5  12   5   52.29    5.90
  -5  12   5   53.99    7.70
  -4  12   5   13.70    3.20
  -4  12   5    9.70    3.90
  -3  12   5   63.09    7.10
  -2  12   5   48.10    3.20
  -2  12   5   49.60    3.30
  -2  12   5   46.80    5.70
  -1  12   5   11.30    1.80
  -1  12   5   11.30    3.00
  -1  12   5    8.50    1.60
   0 -12  -5   85.09    6.10
   0  12   5   99.19    6.50
   0  12   5  105.89    7.30
   0  12   5   87.89    6.50
  -1 -12  -5   -0.10    1.40
  -1 -12  -5   -0.10    1.10
   1  12   5   -2.50    1.40
   1  12   5    0.60    1.30
   1  12   5   -4.00    1.20
  -2 -12  -5  103.99    7.20
  -2 -12  -5  107.99    7.80
   2  12   5  103.19    6.90
   2  12   5   96.49    7.70
  -3 -12  -5   78.99    6.80
  -3 -12  -5   65.49    7.80
   3  12   5   61.59    6.30
  -4 -12  -5   19.70    4.10
   4  12   5   19.60    4.00
  -5 -12  -5   49.90    6.80
   5  12   5   57.59    6.70
  -6 -12  -5    2.80    3.60
   6  12   5    3.60    3.30
  -7 -12  -5   29.00    6.10
  -6  13   5   24.80    6.40
  -5  13   5    1.30    2.20
  -5  13   5    3.30    3.70
  -4  13   5   66.69    6.70
  -4  13   5   79.39    7.60
  -3  13   5    4.50    2.80
  -2  13   5   49.70    3.40
  -2  13   5   71.49    7.10
  -1  13   5    8.70    2.90
  -1  13   5   10.00    1.90
  -1  13   5    3.50    1.50
   0 -13  -5    0.10    1.10
   0  13   5    1.20    1.50
   0  13   5   -1.10    1.30
   0  13   5   -0.80    1.80
  -1 -13  -5   38.90    4.10
   1  13   5   25.90    3.70
   1  13   5   33.80    3.60
   1  13   5   28.20    4.00
  -2 -13  -5   55.79    5.70
   2  13   5   55.89    5.80
  -3 -13  -5   35.00    5.00
   3  13   5   25.50    4.30
  -4 -13  -5  138.99   10.40
   4  13   5  116.29    9.90
  -5 -13  -5   -3.60    2.70
   5  13   5    1.80    2.80
  -6 -13  -5   57.89    8.10
   6  13   5   65.59    7.90
  -5  14   5   -0.40    2.40
  -5  14   5   -5.00    3.10
  -4  14   5   19.90    4.80
  -4  14   5   16.00    3.80
  -3  14   5   -1.00    2.40
  -2  14   5  187.88   13.30
  -1  14   5   -0.10    2.20
  -1  14   5    0.90    1.30
   0  14   5  137.59    9.10
   0  14   5  115.39    8.70
  -1 -14  -5   -2.10    1.40
   1  14   5   -1.50    1.60
   1  14   5   -0.40    1.20
  -2 -14  -5  116.19    8.50
   2  14   5  104.89    8.60
  -3 -14  -5    1.80    2.40
   3  14   5    2.50    2.50
  -4 -14  -5   47.30    6.30
   4  14   5   34.40    5.50
  -5 -14  -5    1.70    3.20
   5  14   5   -3.30    2.50
  -6 -14  -5    2.00    3.90
   6  14   5    6.90    3.60
  -5  15   5    2.80    3.30
  -5  15   5   -0.30    2.60
  -4  15   5   36.40    5.70
  -4  15   5   37.00    6.10
  -3  15   5   18.60    4.20
  -2  15   5   30.10    4.90
  -1  15   5   19.30    4.00
  -1  15   5   16.90    2.50
   0  15   5   -3.80    1.40
   0  15   5   -2.90    1.70
   1  15   5   53.69    4.40
   1  15   5   53.19    6.00
   2  15   5   37.60    5.30
  -3 -15  -5   27.30    4.60
   3  15   5   18.60    4.20
  -4 -15  -5   91.09    9.30
   4  15   5   75.99    8.50
  -5 -15  -5   -1.20    3.00
   5  15   5    0.50    2.80
  -4  16   5   -3.90    2.50
  -4  16   5   -3.20    3.00
  -3  16   5   21.10    4.80
  -2  16   5   -1.50    2.60
  -1  16   5    9.00    2.00
  -1  16   5   10.20    3.40
   0  16   5   33.60    4.20
   0  16   5   47.30    6.90
   1  16   5    0.40    2.20
   2  16   5    7.70    3.10
   3  16   5   37.60    5.50
   4  16   5    3.10    2.90
   5  16   5   42.40    6.40
  -4  17   5    0.30    3.60
  -4  17   5   -5.10    2.40
  -3  17   5   29.50    5.60
  -2  17   5    1.80    3.10
  -1  17   5   95.09    6.70
   0  17   5    1.00    1.90
   1  17   5   89.49    7.80
   2  17   5    3.90    2.60
   3  17   5   31.60    5.20
   4  17   5    0.70    2.70
   0  18   5    6.90    2.20
   1  18   5    8.40    2.90
   2  18   5   11.00    3.50
   3  18   5   57.29    7.50
   0  19   5    0.20    2.00
   1  19   5    6.20    2.90
   2  19   5   38.80    5.90
   0  18  -6   27.50    5.90
   0  18  -6   23.40    5.00
  -1  18  -6   -0.60    2.90
  -1  18  -6    0.50    4.00
   2  17  -6   22.20    5.60
   2  17  -6   38.20    6.80
   1  17  -6   15.60    4.60
   1  17  -6    6.60    4.00
   0  17  -6    1.20    3.80
   0  17  -6    5.70    3.60
  -1  17  -6   33.00    5.30
  -1  17  -6   46.50    7.40
  -2  17  -6   -2.60    3.10
  -2  17  -6   -0.90    2.70
  -3  17  -6   35.10    6.80
  -3  17  -6   31.70    4.30
   3  16  -6   61.99    8.30
   3  16  -6   57.99    7.60
   2  16  -6   -0.90    3.60
   2  16  -6   -0.10    2.80
   1  16  -6   54.79    7.60
   1  16  -6   61.79    7.60
   0  16  -6    5.30    3.50
   0  16  -6    5.70    3.50
  -1  16  -6   13.90    3.80
  -1  16  -6   19.90    5.10
  -2  16  -6   15.80    3.80
  -2  16  -6   18.40    5.30
  -3  16  -6   -1.00    1.80
  -3  16  -6    6.30    4.20
  -4  16  -6   13.40    4.80
   3  15  -6   -0.20    2.60
   3  15  -6    0.40    3.60
   2  15  -6   -1.80    3.00
   2  15  -6   -0.80    2.90
   1  15  -6   53.99    7.30
   1  15  -6   62.29    7.50
   0  15  -6    2.60    3.00
   0  15  -6   -0.60    2.60
  -1  15  -6   81.09    7.40
  -1  15  -6   87.19    9.60
  -2  15  -6   -0.10    2.50
  -2  15  -6   -0.40    3.10
  -3  15  -6   64.89    8.30
  -3  15  -6   61.49    5.60
  -4  15  -6    1.90    1.70
  -4  15  -6    1.60    3.50
   4  14  -6   -1.40    2.60
   4  14  -6    2.70    3.70
  -4 -14   6    1.00    3.70
   3  14  -6   59.09    7.20
   3  14  -6   71.79    8.50
  -3 -14   6   49.30    7.30
   2  14  -6    4.70    3.20
   2  14  -6    3.80    3.60
  -2 -14   6    6.70    3.50
   1  14  -6   21.00    4.70
   1  14  -6   25.90    4.90
   0  14  -6   46.80    6.00
   0  14  -6   50.99    6.90
  -1  14  -6    7.20    3.40
  -1  14  -6   -0.10    2.30
  -2  14  -6   47.60    5.50
  -2  14  -6   52.89    7.40
  -3  14  -6   19.70    4.70
  -3  14  -6   16.90    3.10
  -4  14  -6   18.20    4.90
  -4  14  -6   18.90    3.00
  -5  14  -6   35.90    7.10
   5  13  -6   -2.90    3.30
  -5 -13   6    3.90    4.50
   4  13  -6   82.89    9.60
   4  13  -6  103.59    8.60
  -4 -13   6  111.29   11.40
   3  13  -6   18.20    4.80
   3  13  -6   16.60    4.00
  -3 -13   6   13.80    4.50
   2  13  -6   79.09    8.30
   2  13  -6   57.09    6.80
  -2 -13   6   55.79    6.90
   1  13  -6   38.10    5.80
   1  13  -6   41.50    6.10
  -1 -13   6   59.99    7.00
   0  13  -6   28.80    4.80
   0  13  -6   21.60    4.70
   0 -13   6   29.00    4.80
  -1  13  -6   43.50    5.10
  -1  13  -6   40.00    6.00
  -2  13  -6   -1.10    3.10
  -2  13  -6    4.20    2.60
  -3  13  -6   35.40    4.30
  -3  13  -6   32.40    5.60
  -4  13  -6    8.10    4.20
  -4  13  -6   10.20    2.40
  -5  13  -6    5.80    3.60
  -5  13  -6    4.90    1.90
  -6  13  -6   35.60    6.70
   5  12  -6   -0.60    3.30
  -5 -12   6    1.30    3.80
   4  12  -6   -2.20    2.20
   4  12  -6    7.00    3.80
  -4 -12   6   11.60    4.50
   3  12  -6    0.30    3.00
   3  12  -6   -2.80    2.10
  -3 -12   6   -2.10    2.70
   2  12  -6   18.70    4.10
   2  12  -6   22.30    4.00
  -2 -12   6   10.50    3.70
   1  12  -6   -2.50    2.20
   1  12  -6   -2.40    2.20
  -1 -12   6    1.30    2.60
   0  12  -6  128.09    9.70
   0  12  -6  121.39   10.10
   0  12  -6  133.49    9.70
   0 -12   6  141.89    9.90
  -1  12  -6   -1.80    1.90
  -1  12  -6    2.30    2.60
   1 -12   6   -0.10    1.90
  -2  12  -6  183.68   13.90
  -2  12  -6  207.38   13.00
  -3  12  -6    0.80    1.80
  -3  12  -6   -0.40    2.60
  -4  12  -6   80.29    6.20
  -4  12  -6   75.39    8.70
  -5  12  -6    0.50    3.10
  -5  12  -6    1.80    1.70
  -6  12  -6    4.50    2.60
  -6  12  -6    8.60    4.10
   5  11  -6    1.50    3.10
  -5 -11   6    0.00    3.40
   4  11  -6   66.09    8.10
   4  11  -6   77.09    6.80
  -4 -11   6  102.39   10.30
   3  11  -6   -0.90    2.00
   3  11  -6    2.60    2.80
  -3 -11   6   -2.00    2.80
   2  11  -6   77.29    7.90
   2  11  -6   60.29    6.20
  -2 -11   6   76.99    8.00
   1  11  -6   27.90    4.50
   1  11  -6   37.50    5.20
  -1 -11   6   27.10    4.50
   0  11  -6   -1.80    1.90
   0  11  -6   -2.10    1.90
   0  11  -6    1.30    1.90
   0 -11   6   -1.30    1.90
  -1  11  -6   16.90    3.30
  -1  11  -6   16.70    3.90
  -1  11  -6   21.70    3.40
  -1  11  -6   23.60    2.70
   1 -11   6   24.60    3.70
  -2  11  -6   28.90    3.80
  -2  11  -6   40.40    4.70
  -2  11  -6   32.80    5.20
  -2  11  -6   25.10    3.40
   2 -11   6   33.40    3.70
  -3  11  -6   17.10    3.00
  -3  11  -6    9.20    3.50
  -4  11  -6   75.49    8.60
  -4  11  -6   69.59    5.70
  -5  11  -6    7.50    4.00
  -5  11  -6    7.70    2.20
  -6  11  -6   47.40    7.20
  -6  11  -6   45.10    4.90
   6  10  -6    6.60    4.10
  -6 -10   6    1.90    4.00
   5  10  -6   89.99    9.60
  -5 -10   6   65.89    8.50
   4  10  -6    8.30    2.80
   4  10  -6    8.40    3.80
  -4 -10   6    5.90    3.40
   3  10  -6  100.59    7.90
   3  10  -6   97.79    8.70
  -3 -10   6  108.69    9.30
   2  10  -6   39.30    4.90
   2  10  -6   32.40    4.90
  -2 -10   6   40.20    5.80
   1  10  -6   78.09    6.70
   1  10  -6   78.79    6.90
  -1 -10   6   79.29    7.10
   0  10  -6  135.99    9.10
   0  10  -6  122.99    7.40
   0  10  -6  114.29    8.70
   0  10  -6  118.79    9.30
   0 -10   6  130.39    9.20
  -1  10  -6    3.50    1.40
  -1  10  -6    2.10    1.90
  -1  10  -6    3.70    2.20
  -1  10  -6    2.50    2.40
   1 -10   6    4.60    2.20
  -2  10  -6  174.38   12.00
  -2  10  -6  155.58   10.80
  -2  10  -6  179.58   11.30
  -2  10  -6  155.88   10.60
   2 -10   6  179.58   10.80
  -3  10  -6   23.90    3.30
  -3  10  -6   19.20    4.20
  -3  10  -6   28.10    3.60
  -4  10  -6   59.89    7.50
  -4  10  -6   65.29    5.40
  -5  10  -6  105.59    7.70
  -5  10  -6  114.19    9.90
  -6  10  -6   21.80    5.30
  -6  10  -6   21.00    3.40
  -7  10  -6   89.39   10.50
  -7  10  -6   81.79    7.10
   6   9  -6    1.40    3.40
  -6  -9   6    1.80    3.50
   5   9  -6    0.60    2.90
  -5  -9   6    9.00    3.80
   4   9  -6    6.10    2.40
   4   9  -6    4.90    3.00
  -4  -9   6    4.20    3.20
  -4  -9   6    5.40    2.40
   3   9  -6   29.70    4.80
   3   9  -6   36.30    4.50
  -3  -9   6   42.40    3.90
  -3  -9   6   31.60    5.30
   2   9  -6   12.70    3.10
   2   9  -6   15.90    3.10
  -2  -9   6   11.50    1.80
  -2  -9   6   14.80    3.50
   1   9  -6  168.08   11.10
   1   9  -6  153.88   11.00
   1   9  -6  165.68   11.20
  -1  -9   6  167.98   11.50
   0   9  -6   44.10    5.30
   0   9  -6   47.90    4.60
   0   9  -6   55.09    5.00
   0   9  -6   44.50    3.50
   0  -9   6   44.00    5.20
  -1   9  -6  353.36   21.60
  -1   9  -6  372.16   22.30
  -1   9  -6  418.36   22.50
  -1   9  -6  371.26   22.90
   1  -9   6  377.56   22.40
  -2   9  -6    1.80    2.10
  -2   9  -6   -0.60    1.90
  -2   9  -6    0.60    1.30
  -2   9  -6   -0.60    1.40
   2  -9   6    1.90    1.60
  -3   9  -6  289.37   16.90
  -3   9  -6  262.47   16.90
  -3   9  -6  272.67   18.00
   3  -9   6  290.77   16.40
  -4   9  -6    2.40    2.50
  -4   9  -6    2.10    1.70
  -5   9  -6   37.00    5.80
  -5   9  -6   46.90    4.80
  -6   9  -6    4.30    3.30
  -6   9  -6    2.50    2.00
  -7   9  -6    1.30    2.20
  -7   9  -6   -3.10    3.30
   6   8  -6    2.10    3.30
  -6  -8   6   -1.80    3.40
   5   8  -6  122.89   10.10
  -5  -8   6  123.39   10.90
  -5  -8   6  125.19    9.40
   4   8  -6   -0.40    1.60
   4   8  -6    1.80    2.40
  -4  -8   6    2.50    3.00
  -4  -8   6    0.60    1.90
   3   8  -6  235.08   14.10
   3   8  -6  194.38   14.40
  -3  -8   6  227.98   13.60
  -3  -8   6  229.38   15.20
   2   8  -6    0.50    1.90
   2   8  -6    1.40    1.80
  -2  -8   6   -1.40    2.00
  -2  -8   6    0.50    1.30
   1   8  -6   59.79    5.60
   1   8  -6   61.29    5.40
   1   8  -6   61.69    5.40
  -1  -8   6   56.89    4.00
  -1  -8   6   64.89    5.90
   0   8  -6   40.60    3.60
   0   8  -6   57.69    4.70
   0   8  -6   54.99    4.90
   0   8  -6   46.80    5.30
   0  -8   6   46.90    5.30
  -1   8  -6   26.40    2.90
  -1   8  -6   23.20    3.70
  -1   8  -6   23.60    3.40
  -1   8  -6   20.10    3.10
   1  -8   6   25.00    3.60
  -2   8  -6   47.60    4.80
  -2   8  -6   49.40    4.60
  -2   8  -6   50.49    4.30
  -2   8  -6   47.50    5.60
   2  -8   6   53.99    4.40
  -3   8  -6  117.29    8.20
  -3   8  -6  106.19    8.90
  -3   8  -6  111.19    8.00
   3  -8   6  129.89    7.70
  -4   8  -6   46.40    4.50
  -4   8  -6   43.50    6.00
  -4   8  -6   49.00    4.30
   4  -8   6   41.40    3.70
  -5   8  -6  132.59    9.10
  -5   8  -6  127.09   10.70
  -6   8  -6   -3.10    2.80
  -6   8  -6    3.80    2.20
  -7   8  -6   67.09    6.60
  -7   8  -6   64.69    8.20
   7   7  -6   14.40    4.70
  -7  -7   6    8.90    5.10
   6   7  -6   73.09    8.40
  -6  -7   6   53.29    7.70
  -6  -7   6   54.09    6.60
   5   7  -6    5.00    3.10
  -5  -7   6    3.60    2.30
  -5  -7   6    3.10    3.00
   4   7  -6  130.79   10.60
   4   7  -6  154.48    9.70
  -4  -7   6  153.88   11.40
  -4  -7   6  151.38   10.30
   3   7  -6    4.50    2.60
   3   7  -6    6.90    2.10
  -3  -7   6    9.10    3.10
  -3  -7   6    6.90    2.10
   2   7  -6  153.38   10.50
   2   7  -6  152.18   10.10
  -2  -7   6  149.09   10.70
  -2  -7   6  153.88    9.70
   1   7  -6   43.50    4.70
   1   7  -6   43.70    4.20
   1   7  -6   47.00    4.30
  -1  -7   6   34.40    3.20
  -1  -7   6   37.10    4.50
   0   7  -6   15.80    2.20
   0   7  -6   17.10    3.00
   0   7  -6   12.40    2.50
   0   7  -6   15.10    2.80
   0  -7   6   16.20    3.00
  -1   7  -6  217.08   13.10
  -1   7  -6  218.58   13.10
  -1   7  -6  204.88   13.30
  -1   7  -6  187.28   12.40
   1  -7   6  215.08   13.10
  -2   7  -6    2.10    2.00
  -2   7  -6    3.70    1.70
  -2   7  -6    5.10    2.00
  -2   7  -6    1.50    1.40
   2  -7   6   -0.40    1.30
  -3   7  -6  124.99    8.10
  -3   7  -6  105.29    8.80
  -3   7  -6  120.49    8.20
   3  -7   6  118.79    7.70
  -4   7  -6   45.60    4.50
  -4   7  -6   37.00    5.30
  -4   7  -6   47.40    4.70
   4  -7   6   38.50    3.70
  -5   7  -6   26.00    4.90
  -5   7  -6   23.10    3.50
  -6   7  -6   98.39    9.20
  -6   7  -6   92.29    7.50
  -7   7  -6    5.00    3.60
  -7   7  -6    0.80    2.20
   7   6  -6   12.20    4.60
  -7  -6   6   16.70    4.90
  -7  -6   6   10.10    4.40
   6   6  -6    7.00    3.50
  -6  -6   6    7.70    3.70
  -6  -6   6    1.60    2.80
   5   6  -6   -0.20    2.30
  -5  -6   6    1.00    2.30
  -5  -6   6   -3.20    2.60
   4   6  -6    2.60    2.40
   4   6  -6    0.40    1.50
  -4  -6   6    2.30    2.60
  -4  -6   6    1.50    2.10
   3   6  -6    6.60    2.60
   3   6  -6    4.00    1.80
  -3  -6   6    6.80    2.90
  -3  -6   6    5.30    2.00
   2   6  -6   41.00    4.00
   2   6  -6   37.20    4.60
  -2  -6   6   36.50    3.70
  -2  -6   6   55.19    5.60
   1   6  -6   79.79    6.20
   1   6  -6   76.99    6.10
   1   6  -6   76.99    6.20
   1   6  -6   90.19    5.40
  -1  -6   6   75.59    5.60
  -1  -6   6   80.19    6.40
   0   6  -6  457.45   26.90
   0   6  -6  480.15   27.50
   0   6  -6  516.25   27.60
   0   6  -6  479.45   27.50
   0  -6   6  432.36   26.70
   0  -6   6  501.35   27.70
  -1   6  -6  146.39    9.40
  -1   6  -6  154.58    9.90
  -1   6  -6  136.09    9.80
  -1   6  -6  157.78   10.20
   1  -6   6  159.38   10.00
   1  -6   6  152.78    9.70
  -2   6  -6  583.04   36.90
  -2   6  -6  657.93   37.60
  -2   6  -6  728.53   37.30
  -2   6  -6  646.84   36.90
   2  -6   6  646.04   36.80
   2  -6   6  662.53   36.90
  -3   6  -6   -1.90    1.20
  -3   6  -6    0.30    1.90
  -3   6  -6   -2.10    1.50
   3  -6   6    0.80    1.20
  -4   6  -6  256.67   15.60
  -4   6  -6  252.87   16.80
  -4   6  -6  269.77   15.80
   4  -6   6  254.57   15.30
  -5   6  -6    8.70    2.30
  -5   6  -6   10.40    2.80
  -5   6  -6    4.90    2.60
   5  -6   6    8.90    2.00
  -6   6  -6    7.00    3.40
  -6   6  -6    8.70    2.60
  -7   6  -6   13.90    4.10
  -7   6  -6   10.20    3.20
  -8   6  -6   14.40    4.00
   7   5  -6    5.80    3.80
  -7  -5   6   -4.00    3.20
  -7  -5   6   -1.20    3.40
   6   5  -6  120.19    9.90
  -6  -5   6  110.09   10.20
  -6  -5   6  105.89    9.40
   5   5  -6    6.50    3.00
  -5  -5   6    4.80    3.10
  -5  -5   6   -3.30    2.10
   4   5  -6  145.79   10.40
   4   5  -6  139.69    8.80
  -4  -5   6  133.59    9.80
  -4  -5   6  143.39   10.60
   3   5  -6   45.70    5.40
   3   5  -6   58.39    4.20
  -3  -5   6   45.80    4.60
  -3  -5   6   37.90    5.10
   2   5  -6  488.95   28.10
   2   5  -6  491.25   27.60
  -2  -5   6  482.35   27.60
  -2  -5   6  468.55   28.30
   1   5  -6   27.00    2.60
   1   5  -6   23.10    3.10
   1   5  -6   25.90    3.40
   1   5  -6   28.80    3.40
  -1  -5   6   21.50    2.80
  -1  -5   6   20.50    3.30
   0   5  -6   15.80    2.30
   0   5  -6   15.60    2.70
   0   5  -6   13.70    2.60
   0   5  -6   12.50    2.60
   0  -5   6   11.90    2.40
   0  -5   6   14.00    2.10
   0  -5   6   11.10    2.40
   0  -5   6   13.80    2.70
  -1   5  -6    9.20    1.90
  -1   5  -6   13.40    2.60
  -1   5  -6    5.60    2.10
  -1   5  -6    8.80    2.30
   1  -5   6   11.40    2.50
   1  -5   6   10.80    2.10
   1  -5   6    9.80    2.30
  -2   5  -6  171.58   10.70
  -2   5  -6  160.98   10.50
  -2   5  -6  191.48   10.80
  -2   5  -6  146.09   10.90
   2  -5   6  175.48   10.40
   2  -5   6  149.79   10.30
  -3   5  -6   31.20    3.60
  -3   5  -6   31.50    4.40
  -3   5  -6   27.30    3.50
   3  -5   6   32.60    3.10
  -4   5  -6  134.39   10.00
  -4   5  -6  146.39    9.20
  -4   5  -6  118.19    8.90
   4  -5   6  143.49    8.80
  -5   5  -6   -0.90    2.20
  -5   5  -6    2.00    1.80
  -5   5  -6    3.80    1.90
   5  -5   6   -0.20    1.50
  -6   5  -6  105.99    8.90
  -6   5  -6  141.29   10.30
  -7   5  -6   -0.30    2.30
  -7   5  -6    1.90    3.00
  -8   5  -6   51.09    6.60
   7   4  -6    7.40    4.10
  -7  -4   6   10.70    4.20
  -7  -4   6   14.90    4.80
   6   4  -6    8.40    3.30
  -6  -4   6    2.60    2.90
  -6  -4   6    4.10    3.00
   5   4  -6   55.89    6.40
  -5  -4   6   41.40    5.70
  -5  -4   6   45.00    6.00
   4   4  -6    8.10    2.90
   4   4  -6   10.60    1.80
  -4  -4   6   12.30    3.00
  -4  -4   6   10.10    3.00
   3   4  -6  157.68    9.80
   3   4  -6  168.68   10.90
  -3  -4   6  161.48   11.00
  -3  -4   6  156.58   10.50
   2   4  -6   83.49    5.80
   2   4  -6   81.09    6.50
  -2  -4   6   84.69    6.10
  -2  -4   6   78.99    6.70
   1   4  -6  133.39    9.00
   1   4  -6  136.19    8.90
   1   4  -6  142.49    9.20
   1   4  -6  145.99    8.70
  -1  -4   6  126.59    8.80
  -1  -4   6  141.49    9.40
   0   4  -6  404.66   23.40
   0   4  -6  404.76   23.30
   0   4  -6  416.26   23.20
   0   4  -6  444.16   23.60
   0  -4   6  353.36   22.90
   0  -4   6  404.16   23.30
   0  -4   6  391.66   23.30
   0  -4   6  412.96   23.60
  -1   4  -6    7.80    1.80
  -1   4  -6    7.70    2.20
  -1   4  -6   11.40    2.30
  -1   4  -6    8.90    2.20
   1  -4   6    9.70    2.40
   1  -4   6   11.50    2.20
   1  -4   6   10.30    2.30
  -2   4  -6  227.08   15.60
  -2   4  -6  259.37   15.40
  -2   4  -6  280.17   15.50
  -2   4  -6  240.98   15.30
   2  -4   6  231.38   15.60
   2  -4   6  263.47   15.20
   2  -4   6  281.27   15.40
  -3   4  -6   28.10    3.50
  -3   4  -6   26.70    4.10
  -3   4  -6   34.10    3.80
   3  -4   6   33.90    3.40
   3  -4   6   33.50    3.70
  -4   4  -6   74.89    6.20
  -4   4  -6   83.49    6.20
  -4   4  -6   82.19    7.00
   4  -4   6   86.89    6.00
  -5   4  -6  267.37   15.80
  -5   4  -6  230.58   15.60
  -5   4  -6  260.27   16.60
   5  -4   6  257.67   15.40
  -6   4  -6   11.90    3.00
  -7   4  -6  103.79    8.60
  -7   4  -6   86.29    8.20
  -8   4  -6    0.80    2.70
  -7  -3   6   26.50    5.50
  -7  -3   6   25.50    5.40
   6   3  -6   30.30    5.30
  -6  -3   6   32.40    5.40
  -6  -3   6   26.20    5.10
   5   3  -6    4.90    2.60
  -5  -3   6    9.00    3.00
   4   3  -6   33.30    2.50
   4   3  -6   26.30    4.20
  -4  -3   6   25.80    4.40
  -4  -3   6   25.50    4.20
   3   3  -6   32.40    4.10
   3   3  -6   34.10    2.90
  -3  -3   6   28.50    3.70
  -3  -3   6   23.80    3.80
   2   3  -6   18.60    2.40
   2   3  -6   20.80    3.00
   2   3  -6   22.10    3.20
  -2  -3   6   20.00    3.30
  -2  -3   6   16.80    2.90
  -2  -3   6   19.20    3.30
   1   3  -6  431.96   26.30
   1   3  -6  475.65   26.10
   1   3  -6  476.75   26.10
   1   3  -6  474.55   26.50
  -1  -3   6  465.85   26.30
  -1  -3   6  431.36   26.40
  -1  -3   6  458.25   26.00
  -1  -3   6  443.16   26.30
   0   3  -6   66.59    5.10
   0   3  -6   54.69    4.80
   0   3  -6   69.59    5.30
   0   3  -6   66.09    5.10
   0  -3   6   64.99    5.00
   0  -3   6   69.09    5.30
   0  -3   6   58.49    5.00
   0  -3   6   69.99    5.20
  -1   3  -6  555.84   30.60
  -1   3  -6  541.65   30.60
  -1   3  -6  524.95   30.40
  -1   3  -6  518.45   30.70
   1  -3   6  550.84   30.60
   1  -3   6  542.65   30.70
   1  -3   6  525.65   30.50
   1  -3   6  529.65   30.40
  -2   3  -6   80.39    6.20
  -2   3  -6   79.99    6.10
  -2   3  -6   90.79    6.20
  -2   3  -6   82.49    6.60
   2  -3   6   84.29    6.10
   2  -3   6   83.19    5.90
   2  -3   6   96.39    6.70
  -3   3  -6  277.17   16.10
  -3   3  -6  263.17   16.40
  -3   3  -6  294.57   16.10
  -3   3  -6  244.78   16.60
   3  -3   6  252.27   16.50
   3  -3   6  273.67   15.90
   3  -3   6  275.17   16.00
  -4   3  -6   92.19    7.20
  -4   3  -6  102.29    8.10
  -4   3  -6  118.59    7.40
   4  -3   6  100.69    7.10
  -5   3  -6   80.99    6.40
  -5   3  -6   77.49    7.00
  -5   3  -6   76.29    6.50
   5  -3   6   70.19    6.00
  -6   3  -6   26.90    4.10
  -6   3  -6   21.10    3.90
   6  -3   6   15.80    3.10
  -7   3  -6    7.30    2.90
  -8   3  -6   13.80    4.20
  -7  -2   6   70.49    8.60
  -7  -2   6   52.99    7.60
   6   2  -6    0.60    2.50
  -6  -2   6    0.10    2.50
  -6  -2   6   -2.70    2.70
   5   2  -6  210.48   14.00
  -5  -2   6  200.98   14.20
  -5  -2   6  222.78   14.50
   4   2  -6    1.30    1.90
  -4  -2   6    0.60    2.00
  -4  -2   6   -1.40    1.80
   3   2  -6  407.46   22.60
   3   2  -6  392.06   21.40
  -3  -2   6  359.66   22.40
  -3  -2   6  357.26   22.50
   2   2  -6    1.30    1.50
   2   2  -6    0.40    1.30
   2   2  -6    0.90    1.20
  -2  -2   6    0.30    1.50
  -2  -2   6    0.60    1.40
  -2  -2   6    2.10    1.80
   1   2  -6  231.98   14.70
   1   2  -6  248.98   14.60
   1   2  -6  256.67   14.90
   1   2  -6  238.58   14.50
  -1  -2   6  249.88   14.80
  -1  -2   6  237.38   14.70
  -1  -2   6  242.38   14.90
  -1  -2   6  253.67   14.50
   0   2  -6    9.60    2.20
   0   2  -6    7.60    2.20
   0   2  -6    4.50    1.80
   0   2  -6    6.90    1.90
   0  -2   6    7.70    2.10
   0  -2   6    6.00    1.90
   0  -2   6    8.00    2.20
   0  -2   6    6.70    1.90
  -1   2  -6   20.40    3.10
  -1   2  -6   20.50    3.00
  -1   2  -6   14.70    2.50
  -1   2  -6   26.20    3.40
   1  -2   6   21.50    2.90
   1  -2   6   23.90    3.00
   1  -2   6   23.00    3.20
   1  -2   6   24.00    2.90
  -2   2  -6    3.20    1.70
  -2   2  -6    4.60    2.00
  -2   2  -6    3.90    2.00
  -2   2  -6    3.10    1.70
   2  -2   6    4.70    1.60
   2  -2   6    4.80    2.10
   2  -2   6    2.60    1.50
  -3   2  -6  307.57   18.10
  -3   2  -6  304.37   18.40
  -3   2  -6  328.77   18.10
  -3   2  -6  265.77   18.50
   3  -2   6  301.87   17.90
   3  -2   6  304.47   17.90
   3  -2   6  340.77   18.90
  -4   2  -6    4.70    1.90
  -4   2  -6    2.70    1.90
  -4   2  -6    2.90    2.20
   4  -2   6    3.10    1.70
   4  -2   6    1.90    2.00
  -5   2  -6  323.27   18.90
  -5   2  -6  282.87   18.70
  -5   2  -6  288.97   19.10
   5  -2   6  342.87   18.80
  -6   2  -6    1.20    2.30
  -6   2  -6   -0.70    2.10
   6  -2   6    2.20    2.00
  -7   2  -6  193.88   13.80
  -8   2  -6    4.20    3.30
  -7  -1   6   35.20    6.60
  -7  -1   6   27.70    5.50
   6   1  -6   14.50    3.50
  -6  -1   6   12.40    3.60
  -6  -1   6   11.90    3.90
   5   1  -6    5.70    2.40
  -5  -1   6    9.90    3.20
  -5  -1   6    1.80    2.20
   4   1  -6   40.30    4.80
  -4  -1   6   39.20    4.80
  -4  -1   6   43.60    5.30
  -4  -1   6   38.40    5.20
   3   1  -6  140.39    8.60
   3   1  -6  108.69    7.10
  -3  -1   6  126.79    8.70
  -3  -1   6  123.89    8.60
  -3  -1   6  126.29    8.50
   2   1  -6   57.89    4.70
   2   1  -6   59.89    4.60
   2   1  -6   46.40    3.90
  -2  -1   6   53.69    4.80
  -2  -1   6   49.80    4.60
  -2  -1   6   55.09    3.80
   1   1  -6  436.36   24.70
   1   1  -6  399.16   24.60
   1   1  -6  422.46   24.40
   1   1  -6  435.06   24.70
  -1  -1   6  421.36   24.80
  -1  -1   6  417.56   24.70
  -1  -1   6  461.55   24.40
  -1  -1   6  441.26   24.80
   0   1  -6   11.30    2.20
   0   1  -6   10.50    2.30
   0   1  -6   10.80    2.30
   0   1  -6   10.80    2.30
   0  -1   6   13.10    2.50
   0  -1   6   12.30    2.30
   0  -1   6    5.60    1.90
   0  -1   6    8.40    2.20
  -1   1  -6  612.44   35.80
  -1   1  -6  610.84   35.60
  -1   1  -6  615.34   35.60
  -1   1  -6  675.03   35.80
   1  -1   6  609.94   35.60
   1  -1   6  646.74   35.90
   1  -1   6  640.04   35.60
   1  -1   6  648.84   35.80
  -2   1  -6   20.70    3.20
  -2   1  -6   16.10    2.60
  -2   1  -6   18.80    2.70
  -2   1  -6   19.70    2.70
   2  -1   6   19.50    2.50
   2  -1   6   17.00    2.90
   2  -1   6   19.60    2.60
  -3   1  -6  348.47   21.80
  -3   1  -6  362.36   21.50
  -3   1  -6  345.37   22.00
  -3   1  -6  393.06   21.60
   3  -1   6  369.76   22.20
   3  -1   6  396.56   21.50
   3  -1   6  379.26   21.40
  -4   1  -6  143.89    8.90
  -4   1  -6  120.49    8.80
  -4   1  -6  125.39    9.20
   4  -1   6  136.09    8.70
   4  -1   6  118.69    9.10
  -5   1  -6   37.10    4.50
  -5   1  -6   36.20    4.50
   5  -1   6   35.80    4.20
  -6   1  -6   68.49    6.80
   6  -1   6   74.79    6.70
  -8   1  -6   37.30    6.10
  -7   0   6   25.50    5.30
  -7   0   6   19.00    5.20
   6   0  -6   12.80    3.30
  -6   0   6   19.70    4.00
  -6   0   6   26.80    5.00
   5   0  -6   81.09    6.90
  -5   0   6   87.09    7.50
  -5   0   6   79.99    7.50
   4   0  -6    7.70    2.50
  -4   0   6   10.50    2.80
  -4   0   6    7.30    2.50
  -4   0   6    9.20    2.70
   3   0  -6   43.70    4.20
  -3   0   6   34.00    4.20
  -3   0   6   48.80    4.10
  -3   0   6   37.60    4.60
   2   0  -6  302.27   18.20
   2   0  -6  350.86   18.90
   2   0  -6  308.07   18.80
  -2   0   6  328.97   18.20
  -2   0   6  312.37   18.90
  -2   0   6  328.27   19.10
   1   0  -6   72.59    5.20
   1   0  -6   64.99    5.00
   1   0  -6   67.89    4.80
   1   0  -6   69.29    5.10
  -1   0   6   60.49    4.70
  -1   0   6   66.59    5.10
  -1   0   6   66.99    5.30
  -1   0   6   67.49    5.30
   0   0  -6  607.94   34.60
   0   0  -6  625.14   34.80
   0   0  -6  612.64   34.70
   0   0  -6  636.54   34.70
   0   0   6  603.24   34.80
   0   0   6  585.94   34.70
   0   0   6  598.94   34.60
   0   0   6  641.14   34.70
  -1   0  -6   -0.50    1.30
  -1   0  -6   -0.10    1.60
  -1   0  -6    0.50    1.80
  -1   0  -6    1.50    1.60
   1   0   6    2.80    1.70
   1   0   6    0.20    1.50
   1   0   6    0.20    1.30
   1   0   6    2.50    1.50
  -2   0  -6 1076.69   61.49
  -2   0  -6 1153.68   61.89
  -2   0  -6 1078.59   61.39
   2   0   6 1054.59   61.39
   2   0   6 1080.09   61.39
   2   0   6 1234.18   62.19
  -3   0  -6   50.29    4.40
  -3   0  -6   42.20    4.70
  -3   0  -6   51.89    4.30
  -3   0  -6   44.30    4.30
   3   0   6   48.40    4.10
   3   0   6   52.59    4.80
   3   0   6   48.40    4.00
  -4   0  -6  244.28   16.40
  -4   0  -6  268.87   16.50
  -4   0  -6  283.07   16.90
   4   0   6  277.97   17.10
   4   0   6  289.27   16.40
  -5   0  -6   46.50    5.10
  -5   0  -6   45.40    5.20
   5   0   6   52.29    4.90
  -6   0  -6    6.60    2.80
   6   0   6    1.50    2.10
  -7   0  -6   34.20    5.60
   7   0   6   34.00    5.60
  -8   0  -6   27.10    5.40
  -7   1   6    4.00    3.70
  -7   1   6    4.30    3.20
   6  -1  -6   82.69    8.30
  -6   1   6  109.89    8.80
   5  -1  -6    7.00    2.50
  -5   1   6    6.90    2.60
  -5   1   6    7.10    3.10
  -5   1   6    6.10    2.60
   4  -1  -6  208.58   12.60
  -4   1   6  193.68   12.70
  -4   1   6  189.48   13.10
  -4   1   6  191.98   12.60
   3  -1  -6    1.80    1.50
  -3   1   6    0.30    1.50
  -3   1   6    2.20    2.00
  -3   1   6   -3.60    1.20
   2  -1  -6  329.17   19.60
   2  -1  -6  344.27   19.80
  -2   1   6  325.57   19.10
  -2   1   6  332.37   20.10
  -2   1   6  355.66   19.80
  -2   1   6  345.67   19.80
   1  -1  -6   35.20    3.70
   1  -1  -6   39.00    3.50
   1  -1  -6   40.00    3.50
  -1   1   6   38.00    4.20
  -1   1   6   28.40    2.90
  -1   1   6   39.30    3.60
  -1   1   6   33.10    3.70
   0  -1  -6   29.20    3.40
   0  -1  -6   26.90    3.10
   0  -1  -6   33.20    3.80
   0  -1  -6   35.90    3.80
   0   1   6   24.90    3.30
   0   1   6   37.90    3.70
   0   1   6   30.60    3.70
   0   1   6   31.00    3.00
  -1  -1  -6   18.80    2.90
  -1  -1  -6   23.20    3.10
  -1  -1  -6   23.00    3.10
  -1  -1  -6   22.80    2.80
   1   1   6   24.80    3.30
   1   1   6   23.40    3.00
   1   1   6   23.60    2.90
   1   1   6   27.10    3.00
  -2  -1  -6  107.99    8.30
  -2  -1  -6  137.39    8.50
  -2  -1  -6  126.39    8.20
  -2  -1  -6  124.09    8.10
   2   1   6  127.39    8.10
   2   1   6  126.39    8.50
   2   1   6  123.59    8.10
   2   1   6  131.89    8.50
  -3  -1  -6   33.70    4.10
  -3  -1  -6   43.80    4.50
  -3  -1  -6   41.30    3.90
  -3  -1  -6   36.00    3.70
   3   1   6   48.00    4.80
   3   1   6   40.60    3.60
   3   1   6   37.70    3.70
  -4  -1  -6  429.76   25.80
  -4  -1  -6  403.16   25.80
   4   1   6  486.35   25.90
   4   1   6  467.15   26.50
  -5  -1  -6    0.70    2.10
   5   1   6   -0.90    1.70
  -6  -1  -6  224.38   14.80
   6   1   6  213.48   14.40
  -7  -1  -6    5.30    3.10
   7   1   6   -2.50    2.20
  -8  -1  -6   51.89    7.30
  -7   2   6    9.30    4.40
  -7   2   6    5.60    3.50
  -6   2   6   16.10    3.70
   5  -2  -6   45.80    5.00
  -5   2   6   35.30    4.70
  -5   2   6   40.50    5.40
   4  -2  -6   17.40    2.80
  -4   2   6   14.90    3.40
  -4   2   6   15.90    2.80
  -4   2   6   15.40    2.90
   3  -2  -6   37.50    4.00
  -3   2   6   43.70    4.50
  -3   2   6   32.90    4.50
  -3   2   6   43.90    4.40
  -3   2   6   38.50    2.60
   2  -2  -6  332.87   18.90
   2  -2  -6  331.47   19.00
  -2   2   6  301.47   18.40
  -2   2   6  298.07   19.30
  -2   2   6  337.47   19.10
  -2   2   6  358.26   19.10
   1  -2  -6   15.80    2.30
   1  -2  -6   17.00    2.60
   1  -2  -6   13.10    2.30
  -1   2   6   18.80    3.10
  -1   2   6   13.70    2.30
  -1   2   6   15.70    2.00
  -1   2   6   14.00    2.40
   0  -2  -6  737.93   39.90
   0  -2  -6  699.33   39.70
   0  -2  -6  662.33   40.10
   0   2   6  698.33   40.20
   0   2   6  728.43   39.90
   0   2   6  741.63   39.70
  -1  -2  -6    7.30    2.00
  -1  -2  -6    7.60    1.80
  -1  -2  -6    8.90    2.20
   1   2   6    6.70    1.70
   1   2   6    6.40    2.10
   1   2   6    7.10    1.80
   1   2   6   10.10    1.90
  -2  -2  -6  587.94   33.70
  -2  -2  -6  581.74   33.30
  -2  -2  -6  581.94   33.40
   2   2   6  586.34   33.20
   2   2   6  560.04   33.50
   2   2   6  663.43   33.90
   2   2   6  585.04   33.30
  -3  -2  -6  138.89    9.10
  -3  -2  -6  126.39    9.00
  -3  -2  -6  154.98    9.50
   3   2   6  124.49    9.10
   3   2   6  141.69    8.90
   3   2   6  141.09    9.00
  -4  -2  -6  209.28   13.30
  -4  -2  -6  199.78   13.40
   4   2   6  217.18   13.30
   4   2   6  226.48   13.70
  -5  -2  -6  102.79    8.50
   5   2   6  120.79    8.40
   6   2   6    8.00    2.80
  -7  -2  -6   17.10    4.30
   7   2   6   20.50    4.50
  -8  -2  -6   21.60    5.10
  -7   3   6   17.00    5.00
  -7   3   6   17.80    4.30
  -6   3   6   51.19    6.00
   5  -3  -6   10.00    2.50
  -5   3   6   15.50    3.20
  -5   3   6   13.90    3.00
   4  -3  -6  175.18   10.90
  -4   3   6  165.08   11.90
  -4   3   6  163.78   10.80
  -4   3   6  173.78   11.10
   3  -3  -6  146.99    8.70
  -3   3   6  122.19    7.60
  -3   3   6  129.49    8.50
  -3   3   6  121.49    9.20
  -3   3   6  137.19    8.70
   2  -3  -6   77.89    5.40
   2  -3  -6   75.39    5.10
  -2   3   6   79.49    5.30
  -2   3   6   60.49    5.60
  -2   3   6   66.29    5.30
   1  -3  -6  347.07   20.00
   1  -3  -6  368.06   20.00
   1  -3  -6  345.47   20.40
  -1   3   6  333.27   20.10
  -1   3   6  363.46   20.10
  -1   3   6  325.87   20.40
   0  -3  -6   16.20    2.40
   0  -3  -6   18.90    2.90
   0  -3  -6   19.90    2.50
   0   3   6   15.80    2.90
   0   3   6   15.40    2.30
   0   3   6   17.80    2.40
  -1  -3  -6  955.50   54.19
  -1  -3  -6  970.70   54.19
  -1  -3  -6  997.10   54.79
   1   3   6 1021.80   54.79
   1   3   6  971.40   54.19
   1   3   6  962.80   54.09
  -2  -3  -6   51.89    4.80
  -2  -3  -6   66.29    4.80
  -2  -3  -6   58.29    4.80
   2   3   6   59.69    4.60
   2   3   6   57.89    4.90
   2   3   6   67.99    4.90
   2   3   6   58.09    4.50
  -3  -3  -6  452.95   27.30
  -3  -3  -6  519.35   28.00
  -3  -3  -6  466.55   27.50
   3   3   6  448.86   27.50
   3   3   6  511.05   27.50
   3   3   6  474.85   27.30
  -4  -3  -6  121.39    9.20
   4   3   6  147.09    9.20
   4   3   6  132.49    9.20
  -5  -3  -6   62.79    6.00
   5   3   6   68.29    6.00
  -6  -3  -6   50.49    6.40
   6   3   6   67.09    7.00
  -7  -3  -6    2.00    3.00
   7   3   6    2.90    2.80
  -8  -3  -6   10.10    4.60
  -7   4   6   40.20    7.30
  -7   4   6   54.49    6.70
  -6   4   6   -0.60    2.00
   5  -4  -6   96.59    6.80
  -5   4   6   69.49    7.50
  -5   4   6   84.69    8.00
  -5   4   6   95.99    7.20
   4  -4  -6   -1.90    1.20
  -4   4   6    0.30    0.60
  -4   4   6    3.50    1.50
  -4   4   6   -0.50    2.00
  -4   4   6   -0.10    1.40
  -4   4   6    1.10    0.70
   3  -4  -6  143.39    9.30
   3  -4  -6  141.59    9.10
  -3   4   6  140.29   10.20
  -3   4   6  153.08    9.30
  -3   4   6  154.98    9.50
   2  -4  -6    9.10    1.60
   2  -4  -6    9.30    1.90
  -2   4   6    9.50    2.50
  -2   4   6    7.00    1.70
  -2   4   6    8.40    1.70
   1  -4  -6  238.38   13.30
   1  -4  -6  199.38   13.70
   1  -4  -6  227.38   13.30
  -1   4   6  227.48   13.40
  -1   4   6  241.28   14.20
  -1   4   6  218.48   13.40
   0  -4  -6   85.99    6.60
   0  -4  -6   94.99    6.20
   0  -4  -6  100.59    6.20
   0   4   6   85.69    6.80
   0   4   6   94.89    6.10
   0   4   6   86.59    6.10
  -1  -4  -6    0.60    1.30
  -1  -4  -6    0.90    1.70
  -1  -4  -6   -0.70    1.40
   1   4   6   -0.10    1.30
   1   4   6    0.80    1.30
   1   4   6    2.70    1.80
  -2  -4  -6   -2.10    1.50
  -2  -4  -6   -0.20    1.40
  -2  -4  -6   -0.90    1.30
   2   4   6    0.50    1.30
   2   4   6   -1.30    1.00
   2   4   6    1.70    1.70
  -3  -4  -6  332.67   18.80
  -3  -4  -6  304.27   18.50
  -3  -4  -6  301.17   18.30
   3   4   6  318.17   18.40
   3   4   6  312.27   18.50
   3   4   6  297.37   18.20
  -4  -4  -6    3.50    2.20
   4   4   6    2.30    1.90
   4   4   6    6.90    2.30
  -5  -4  -6  266.87   17.20
   5   4   6  270.87   16.90
  -6  -4  -6    2.80    2.70
   6   4   6    0.60    2.00
  -7  -4  -6   94.89    8.50
   7   4   6   71.09    8.40
  -8  -4  -6   -0.10    3.50
  -7   5   6   31.90    5.10
  -7   5   6   17.70    5.30
  -6   5   6    0.40    3.20
  -6   5   6    3.00    2.40
  -5   5   6    3.90    2.20
  -5   5   6    2.30    2.70
   4  -5  -6   41.00    3.90
  -4   5   6   31.70    2.70
  -4   5   6   34.30    3.90
  -4   5   6   31.30    3.60
  -4   5   6   31.70    5.00
   3  -5  -6  120.89    7.80
   3  -5  -6  135.99    8.20
  -3   5   6  129.59    8.30
  -3   5   6  122.29    9.40
  -3   5   6  124.29    8.00
   2  -5  -6    3.30    1.00
   2  -5  -6    0.60    1.10
  -2   5   6    2.30    1.30
  -2   5   6    1.80    2.00
  -2   5   6    1.10    1.10
   1  -5  -6  847.02   46.00
   1  -5  -6  880.21   46.90
   1  -5  -6  740.43   46.10
  -1   5   6  818.72   46.20
  -1   5   6  819.02   46.20
  -1   5   6  902.41   47.20
   0  -5  -6   21.20    3.10
   0  -5  -6   25.20    2.60
   0  -5  -6   23.10    2.70
   0   5   6   25.40    2.70
   0   5   6   23.40    2.50
   0   5   6   14.70    3.10
  -1  -5  -6  789.52   42.70
  -1  -5  -6  787.12   42.70
  -1  -5  -6  752.12   43.40
   1   5   6  790.22   42.60
   1   5   6  706.53   43.10
   1   5   6  764.32   42.60
  -2  -5  -6    6.40    2.10
  -2  -5  -6    5.70    2.00
  -2  -5  -6    4.50    1.90
   2   5   6    6.80    2.10
   2   5   6    9.40    1.90
   2   5   6    6.10    1.70
  -3  -5  -6  243.08   15.30
  -3  -5  -6  244.58   15.20
   3   5   6  241.18   14.90
   3   5   6  260.37   15.10
  -4  -5  -6  145.29   10.50
   4   5   6  162.98   10.40
  -5  -5  -6   31.90    4.70
   5   5   6   22.10    3.90
  -6  -5  -6   60.29    7.40
   6   5   6   53.69    6.50
  -7  -5  -6    5.10    3.10
   7   5   6    1.30    2.90
  -8  -5  -6   13.70    4.80
   8   5   6   11.60    4.20
  -7   6   6   25.10    4.60
  -7   6   6   35.80    7.10
  -6   6   6    5.40    2.40
  -6   6   6    6.30    3.50
  -5   6   6   58.69    4.60
  -5   6   6   58.19    5.40
  -5   6   6   59.99    7.90
  -4   6   6   84.79    6.00
  -4   6   6   83.79    7.80
  -4   6   6   83.39    6.20
   3  -6  -6   64.39    4.40
  -3   6   6   75.19    5.20
  -3   6   6   61.99    6.10
   2  -6  -6  339.47   19.00
  -2   6   6  321.17   20.30
  -2   6   6  343.07   19.30
  -2   6   6  343.47   19.50
   1  -6  -6   94.29    5.70
   1  -6  -6   79.39    5.80
   1  -6  -6   88.69    6.50
  -1   6   6   87.39    5.90
  -1   6   6  102.89    7.20
  -1   6   6   95.19    6.00
   0  -6  -6  320.87   18.10
   0  -6  -6  299.77   17.40
   0  -6  -6  311.07   17.20
   0   6   6  296.17   18.20
   0   6   6  290.37   17.30
   0   6   6  290.17   17.20
  -1  -6  -6    7.60    2.10
  -1  -6  -6    3.40    1.60
  -1  -6  -6    5.20    1.60
   1   6   6    2.20    1.40
   1   6   6    4.40    2.10
   1   6   6    4.00    1.50
  -2  -6  -6  404.56   23.40
  -2  -6  -6  397.56   23.00
  -2  -6  -6  375.06   22.90
   2   6   6  419.76   23.00
   2   6   6  372.36   23.00
   2   6   6  414.06   22.90
  -3  -6  -6   60.99    5.50
  -3  -6  -6   62.79    5.50
   3   6   6   72.49    5.50
   3   6   6   70.59    5.40
  -4  -6  -6  107.39    8.30
   4   6   6  109.39    8.00
  -5  -6  -6  129.49    9.90
   5   6   6  132.29    9.70
  -6  -6  -6    0.50    2.50
   6   6   6   -2.40    2.20
  -7  -6  -6   51.09    7.10
   7   6   6   57.79    7.10
  -8  -6  -6    3.30    3.90
   8   6   6    1.80    3.30
  -7   7   6   -0.30    3.90
  -7   7   6    7.30    2.90
  -6   7   6  107.39    8.40
  -6   7   6  116.49   10.50
  -5   7   6   12.20    2.20
  -5   7   6    8.80    3.90
  -5   7   6   10.80    2.40
   4  -7  -6  149.19    9.20
  -4   7   6  140.19   11.20
  -4   7   6  172.18   10.00
  -4   7   6  151.18    9.60
   3  -7  -6   45.00    3.00
   3  -7  -6   39.80    2.90
  -3   7   6   46.40    5.60
  -3   7   6   47.90    3.80
   2  -7  -6  231.28   12.70
   2  -7  -6  227.98   12.70
  -2   7   6  216.58   13.10
  -2   7   6  215.88   14.40
  -2   7   6  230.88   13.30
   1  -7  -6  237.48   13.40
  -1   7   6  240.18   14.60
  -1   7   6  231.38   13.50
  -1   7   6  216.78   13.30
   0  -7  -6   80.19    6.20
   0  -7  -6   92.59    5.60
   0  -7  -6   79.19    5.70
   0   7   6   84.49    5.70
   0   7   6   81.19    6.50
   0   7   6   83.49    5.60
  -1  -7  -6   29.80    3.40
  -1  -7  -6   36.20    3.30
  -1  -7  -6   30.90    4.00
   1   7   6   29.70    3.20
   1   7   6   34.60    4.10
   1   7   6   30.70    3.20
  -2  -7  -6   44.90    4.20
  -2  -7  -6   48.40    4.40
   2   7   6   42.30    4.10
   2   7   6   40.90    4.00
   2   7   6   43.70    4.00
  -3  -7  -6    2.30    1.80
  -3  -7  -6   -0.70    1.70
   3   7   6    1.70    1.70
  -4  -7  -6  152.48   10.70
   4   7   6  145.69   10.20
  -5  -7  -6    8.20    3.10
   5   7   6    6.70    2.60
  -6  -7  -6  126.99   10.10
   6   7   6  101.69    9.40
  -7  -7  -6    1.70    3.50
   7   7   6   -4.30    2.80
  -8  -7  -6   46.70    7.60
   8   7   6   50.49    7.30
  -7   8   6    1.30    2.40
  -7   8   6   -1.40    4.30
  -6   8   6    8.10    4.10
  -6   8   6    2.10    2.00
  -5   8   6    5.20    2.00
  -5   8   6    4.30    1.90
  -5   8   6    0.50    3.70
  -4   8   6   16.60    2.50
  -4   8   6   16.30    2.30
  -4   8   6   12.80    3.70
  -3   8   6    5.10    2.80
  -3   8   6    4.60    1.40
   2  -8  -6   83.59    4.70
   2  -8  -6   80.39    4.60
  -2   8   6   84.49    6.90
  -2   8   6   77.79    5.30
  -2   8   6   74.39    5.20
   1  -8  -6   74.59    4.90
   1  -8  -6   81.19    5.20
  -1   8   6   88.49    6.70
  -1   8   6   80.89    5.30
  -1   8   6   77.39    5.30
   0  -8  -6  399.46   22.40
   0  -8  -6  394.76   23.10
   0  -8  -6  430.66   22.60
   0   8   6  362.56   22.40
   0   8   6  394.16   23.50
   0   8   6  390.96   22.40
  -1  -8  -6  146.69    9.10
  -1  -8  -6  139.59    9.50
  -1  -8  -6  140.19    9.00
   1   8   6  147.29    9.00
   1   8   6  139.19    9.00
   1   8   6  137.49    9.50
  -2  -8  -6  267.37   16.60
  -2  -8  -6  295.67   17.10
   2   8   6  271.97   16.50
   2   8   6  287.77   16.50
   2   8   6  263.07   16.50
  -3  -8  -6   63.79    5.80
  -3  -8  -6   78.69    6.00
   3   8   6   63.59    5.70
  -4  -8  -6   59.99    6.80
   4   8   6   65.09    6.60
  -5  -8  -6    9.20    3.20
   5   8   6    4.80    2.50
  -6  -8  -6    3.10    3.00
   6   8   6    0.70    2.50
  -7  -8  -6   11.80    4.80
   7   8   6   15.40    4.50
  -7   9   6    2.30    4.30
  -7   9   6    1.00    2.50
  -6   9   6   55.49    8.10
  -6   9   6   45.90    5.00
  -5   9   6   19.10    3.10
  -5   9   6   24.80    5.30
  -5   9   6   25.50    3.20
  -4   9   6  123.69    7.50
  -4   9   6  108.49    7.10
  -4   9   6  112.69    9.80
  -3   9   6   45.80    3.40
  -3   9   6   42.20    5.70
  -2   9   6   44.00    3.30
  -2   9   6   38.60    3.20
  -2   9   6   48.70    5.70
   1  -9  -6  150.18    8.50
   1  -9  -6  131.29    8.20
  -1   9   6  138.39    8.60
  -1   9   6  150.68   10.10
  -1   9   6  144.69    8.60
   0  -9  -6    1.80    1.40
   0  -9  -6    0.40    1.00
   0  -9  -6   -0.80    1.00
   0   9   6    1.30    1.20
   0   9   6    2.00    1.20
   0   9   6    1.10    1.80
  -1  -9  -6  230.78   14.50
  -1  -9  -6  230.88   14.90
   1   9   6  253.17   14.60
   1   9   6  242.48   15.00
   1   9   6  258.67   14.60
  -2  -9  -6  115.69    8.70
  -2  -9  -6  139.79    9.30
   2   9   6  152.88    8.80
   2   9   6  118.59    8.50
   2   9   6  122.79    8.70
  -3  -9  -6  134.59    8.90
  -3  -9  -6  120.39    8.90
   3   9   6  109.89    8.50
  -4  -9  -6  162.58   11.30
   4   9   6  144.49   10.60
  -5  -9  -6   20.50    4.10
   5   9   6   18.00    3.80
  -6  -9  -6   68.59    8.20
   6   9   6   80.79    8.40
  -7  -9  -6    6.90    4.20
   7   9   6   -1.20    2.80
  -6  10   6   -0.20    1.70
  -6  10   6    4.30    4.40
  -5  10   6  115.69    7.60
  -5  10   6  125.59   10.50
  -5  10   6  110.49    8.30
  -4  10   6    1.00    3.00
  -4  10   6    2.70    1.00
  -4  10   6    2.20    1.10
  -3  10   6   98.09    8.20
  -3  10   6   94.69    5.90
  -3  10   6  101.29    6.00
  -2  10   6   14.50    1.70
  -2  10   6   16.70    3.60
  -2  10   6   14.60    1.90
   1 -10  -6   20.20    2.10
   1 -10  -6   18.50    1.80
  -1  10   6   26.50    4.20
  -1  10   6   20.40    2.30
  -1  10   6   19.90    2.30
   0 -10  -6   58.99    4.50
   0 -10  -6   67.09    4.70
   0 -10  -6   56.49    4.90
   0  10   6   61.89    5.60
   0  10   6   64.39    4.60
   0  10   6   62.69    4.70
  -1 -10  -6    7.80    2.00
  -1 -10  -6   11.40    2.50
   1  10   6   13.40    2.50
   1  10   6   10.60    2.30
   1  10   6   12.00    2.30
  -2 -10  -6   64.99    5.60
  -2 -10  -6   71.09    5.60
   2  10   6   58.19    5.00
   2  10   6   68.09    5.40
   2  10   6   61.29    5.30
  -3 -10  -6  212.38   12.90
  -3 -10  -6  205.18   12.90
   3  10   6  163.98   12.40
  -4 -10  -6    8.20    3.10
   4  10   6    8.30    2.80
  -5 -10  -6  144.29   11.10
   5  10   6  130.19   10.50
  -6 -10  -6   -4.80    3.10
   6  10   6   -1.70    2.60
  -7 -10  -6   58.59    8.40
   7  10   6   50.09    7.10
  -6  11   6   -1.40    3.70
  -5  11   6    7.30    2.10
  -5  11   6    3.70    2.20
  -5  11   6    2.60    3.30
  -4  11   6    0.70    0.60
  -4  11   6    2.30    3.00
  -4  11   6   -1.20    0.80
  -3  11   6   89.29    5.50
  -3  11   6  100.29    5.50
  -3  11   6   96.09    8.20
  -2  11   6   -1.00    2.00
  -2  11   6    0.60    0.80
  -2  11   6    0.00    0.90
   1 -11  -6  240.98   13.60
   1 -11  -6  218.18   13.40
  -1  11   6  263.37   14.00
  -1  11   6  246.58   15.50
  -1  11   6  234.78   13.90
   0 -11  -6    4.40    1.40
   0  11   6    2.90    1.40
   0  11   6    4.20    2.30
   0  11   6    2.80    1.40
  -1 -11  -6  273.87   17.80
  -1 -11  -6  330.67   18.30
   1  11   6  300.97   18.20
   1  11   6  320.67   18.00
   1  11   6  289.67   18.00
  -2 -11  -6    0.20    1.60
  -2 -11  -6   -0.90    1.60
   2  11   6   -0.30    1.60
   2  11   6   -1.40    1.60
   2  11   6    0.00    1.30
  -3 -11  -6  135.09    9.10
  -3 -11  -6  115.49    9.10
   3  11   6  113.79    8.90
  -4 -11  -6    0.50    2.70
   4  11   6   -1.00    2.10
  -5 -11  -6    5.60    3.40
   5  11   6    3.30    2.90
  -6 -11  -6    8.60    3.90
   6  11   6    5.30    3.30
  -7 -11  -6    5.70    3.90
   7  11   6    0.00    3.00
  -6  12   6    7.10    4.10
  -5  12   6   50.29    7.40
  -5  12   6   53.79    5.80
  -4  12   6    6.60    3.70
  -3  12   6   56.59    7.00
  -2  12   6   36.50    5.20
  -2  12   6   40.60    3.00
  -2  12   6   38.00    3.00
   1 -12  -6   48.50    3.30
   1 -12  -6   49.00    3.20
  -1  12   6   54.69    6.10
  -1  12   6   48.20    3.90
  -1  12   6   55.59    4.00
   0 -12  -6   93.19    6.70
   0  12   6  114.99    8.10
   0  12   6  112.19    7.10
   0  12   6   95.29    7.00
  -1 -12  -6    5.00    1.80
  -1 -12  -6    1.70    1.70
   1  12   6    5.60    1.90
   1  12   6    2.70    1.70
   1  12   6    4.90    1.90
  -2 -12  -6   60.79    5.50
  -2 -12  -6   63.29    5.20
   2  12   6   59.39    4.80
   2  12   6   51.29    5.30
   2  12   6   52.29    5.30
  -3 -12  -6   50.59    5.80
  -3 -12  -6   56.69    6.20
   3  12   6   54.99    6.00
  -4 -12  -6    6.10    3.10
   4  12   6    5.80    2.90
  -5 -12  -6  101.99    9.10
   5  12   6   87.69    8.30
  -6 -12  -6   -3.70    3.10
   6  12   6   -3.00    2.50
  -7 -12  -6   42.70    7.30
  -6  13   6   37.60    7.10
  -5  13   6   -0.90    2.80
  -5  13   6    2.10    3.50
  -4  13   6   80.79    9.20
  -3  13   6   -2.40    2.70
  -2  13   6   22.50    4.30
  -2  13   6   18.30    1.90
  -2  13   6   21.00    2.10
  -1  13   6   49.00    5.60
  -1  13   6   36.90    3.40
  -1  13   6   33.60    3.30
   0 -13  -6    0.30    1.20
   0  13   6    1.90    1.50
   0  13   6    0.20    1.40
   0  13   6   -2.90    1.70
  -1 -13  -6   66.39    5.60
  -1 -13  -6   70.39    5.40
   1  13   6   62.79    5.70
   1  13   6   75.29    5.70
  -2 -13  -6   67.09    6.00
   2  13   6   59.79    6.30
   2  13   6   67.49    5.10
  -3 -13  -6   -1.80    2.10
   3  13   6    1.20    2.10
  -4 -13  -6   89.59    8.30
   4  13   6   75.79    8.10
  -5 -13  -6   -2.00    3.10
   5  13   6    1.20    2.60
  -6 -13  -6   70.99    8.50
   6  13   6   74.19    8.80
  -5  14   6    1.00    3.60
  -4  14   6   20.20    4.60
  -3  14   6   -3.30    2.10
  -2  14   6   71.09    7.20
  -2  14   6   73.49    4.70
  -1  14   6   -0.80    2.20
  -1  14   6    0.20    1.20
   0  14   6  202.98   13.20
   0  14   6  222.68   14.00
  -1 -14  -6    1.20    1.70
   1  14   6    3.50    2.00
   1  14   6   -1.30    1.50
  -2 -14  -6  175.48   11.70
   2  14   6  172.48   10.80
   2  14   6  167.38   11.80
  -3 -14  -6   -0.40    2.40
   3  14   6   -3.00    2.00
  -4 -14  -6   17.90    4.40
   4  14   6   10.60    3.80
  -5 -14  -6    5.70    3.60
   5  14   6    0.00    2.90
  -6 -14  -6   -1.30    3.60
   6  14   6    1.20    3.30
  -5  15   6   -0.10    3.80
  -4  15   6   64.29    8.40
  -4  15   6   50.59    6.50
  -3  15   6    1.40    3.10
  -2  15   6   32.80    5.30
  -2  15   6   24.00    2.20
  -1  15   6   18.40    4.10
  -1  15   6   17.80    2.60
   0  15   6    1.70    1.80
   0  15   6   -4.10    1.70
   1  15   6   11.00    3.40
   1  15   6   20.40    2.90
   2  15   6   19.60    4.10
  -3 -15  -6    0.90    2.60
   3  15   6   -0.80    2.60
  -4 -15  -6   83.99    8.90
   4  15   6   65.39    7.80
  -5 -15  -6    4.10    3.50
   5  15   6    2.50    3.10
  -4  16   6   -3.20    2.30
  -4  16   6   -2.30    3.20
  -3  16   6   20.70    5.00
  -2  16   6   27.80    5.00
  -1  16   6    5.50    3.20
  -1  16   6   10.10    2.00
   0  16   6   32.60    4.00
   0  16   6   31.80    4.40
   1  16   6   15.80    3.40
   2  16   6   28.20    4.50
   3  16   6   75.09    8.20
   4  16   6    1.80    2.80
   5  16   6   60.99    7.90
  -4  17   6   -2.10    3.10
  -4  17   6    2.70    3.80
  -3  17   6   22.60    4.90
  -2  17   6    3.20    3.00
  -1  17   6  107.89    7.40
   0  17   6    0.20    1.80
   1  17   6   74.29    7.30
   2  17   6    5.20    2.80
   3  17   6   23.10    4.80
   4  17   6    1.50    2.80
  -1  18   6   -1.90    1.50
   0  18   6   16.70    3.10
   1  18   6    9.00    3.00
   2  18   6    6.70    3.10
   3  18   6   84.49    9.00
   0  19   6    1.70    2.00
   1  19   6   56.99    6.60
   2  19   6   18.30    4.50
   0  20   6   82.59    7.10
   1  17  -7    5.30    3.90
   1  17  -7   14.60    4.70
   0  17  -7   26.30    5.20
   0  17  -7   24.70    6.00
  -1  17  -7   38.20    6.90
  -1  17  -7   29.90    5.30
  -2  17  -7   -1.30    3.60
  -2  17  -7   -0.20    2.80
   2  16  -7    2.30    3.70
   2  16  -7    3.40    3.40
   1  16  -7   49.30    7.30
   1  16  -7   47.70    7.40
   0  16  -7   15.60    4.40
   0  16  -7   17.40    4.90
  -1  16  -7   -0.80    3.60
  -1  16  -7    5.80    3.20
  -2  16  -7   22.20    5.50
  -2  16  -7   20.80    4.40
  -3  16  -7    0.20    3.90
  -3  16  -7    1.50    2.30
   3  15  -7    6.60    4.20
   3  15  -7   -0.60    3.10
   2  15  -7   -5.40    2.30
   2  15  -7   -2.60    2.90
   1  15  -7   26.70    5.30
   1  15  -7   36.20    6.00
   0  15  -7   -4.60    2.40
   0  15  -7   -1.60    2.60
  -1  15  -7   76.09    7.10
  -1  15  -7   64.49    8.40
  -2  15  -7    0.00    3.00
  -2  15  -7   -2.40    2.60
  -3  15  -7   76.79    6.80
  -3  15  -7   85.19   10.10
  -4  15  -7   -0.90    3.20
  -4  15  -7    3.60    2.20
   4  14  -7   -3.10    3.70
   4  14  -7    2.50    3.30
  -4 -14   7   -0.10    3.90
   3  14  -7   47.70    7.10
   3  14  -7   29.00    5.20
  -3 -14   7   37.00    6.50
   2  14  -7    3.80    3.20
   2  14  -7   13.60    4.40
   1  14  -7   16.40    4.20
   1  14  -7   23.10    4.70
   0  14  -7   25.70    5.30
   0  14  -7   29.60    4.90
  -1  14  -7   -1.00    2.20
  -1  14  -7   -1.70    2.70
  -2  14  -7   18.10    3.80
  -2  14  -7   18.60    4.60
  -3  14  -7   21.70    3.70
  -3  14  -7   21.10    5.20
  -4  14  -7   19.70    3.30
  -4  14  -7   19.10    5.50
  -5  14  -7   31.70    6.60
   4  13  -7   32.50    5.90
   4  13  -7   32.10    5.20
  -4 -13   7   27.00    5.90
   3  13  -7   10.80    3.40
   3  13  -7   10.60    4.20
  -3 -13   7    8.70    4.20
   2  13  -7   56.79    7.20
   2  13  -7   65.39    7.80
  -2 -13   7   50.09    7.00
   1  13  -7   44.10    6.20
   1  13  -7   46.40    6.50
  -1 -13   7   45.90    6.40
   0  13  -7   26.90    4.80
   0  13  -7   28.70    5.30
  -1  13  -7   84.79    8.50
  -1  13  -7  105.19    8.10
  -2  13  -7    2.70    3.60
  -2  13  -7    0.50    2.60
  -3  13  -7   47.70    5.30
  -3  13  -7   44.20    6.80
  -4  13  -7   32.50    3.90
  -4  13  -7   23.90    5.50
  -5  13  -7   29.40    6.10
  -5  13  -7   17.10    3.00
   5  12  -7    4.80    4.10
  -5 -12   7    2.60    4.40
   4  12  -7    3.00    2.70
   4  12  -7    4.20    3.70
  -4 -12   7    6.60    4.10
   3  12  -7    0.20    3.40
   3  12  -7    4.00    2.80
  -3 -12   7   -1.30    3.10
   2  12  -7   79.19    8.30
   2  12  -7   72.89    8.00
  -2 -12   7   73.09    8.20
   1  12  -7   11.50    3.50
   1  12  -7   10.60    3.40
  -1 -12   7   12.30    4.10
   0  12  -7  189.78   14.40
   0  12  -7  228.78   14.30
   0 -12   7  212.48   14.30
  -1  12  -7    1.30    2.50
  -1  12  -7   -0.60    2.40
   1 -12   7    1.20    2.30
  -2  12  -7  173.78   13.40
  -2  12  -7  196.38   12.70
  -3  12  -7    1.10    3.10
  -3  12  -7    1.80    2.10
  -4  12  -7   49.50    4.80
  -4  12  -7   42.90    7.10
  -5  12  -7    6.20    2.20
  -5  12  -7    7.60    3.90
  -6  12  -7   12.80    4.60
  -6  12  -7   11.00    2.80
   5  11  -7   -0.60    3.30
  -5 -11   7   -2.60    3.70
   4  11  -7   78.39    7.20
   4  11  -7   77.59    8.90
  -4 -11   7   98.59   10.50
   3  11  -7    5.30    2.80
   3  11  -7   -1.00    2.60
  -3 -11   7    4.70    3.70
   2  11  -7   50.99    6.10
   2  11  -7   56.89    6.80
  -2 -11   7   59.29    7.50
   1  11  -7    4.20    2.70
   1  11  -7    1.60    2.40
  -1 -11   7    0.60    2.50
   0  11  -7   19.20    3.40
   0  11  -7   21.60    2.00
   0  11  -7   21.00    4.10
   0  11  -7   18.70    4.10
   0 -11   7   24.60    4.10
  -1  11  -7   17.30    3.60
  -1  11  -7   20.40    2.60
  -1  11  -7   19.40    3.30
  -1  11  -7   19.40    4.10
   1 -11   7   20.40    3.60
  -2  11  -7   -1.00    2.40
  -2  11  -7   -1.10    1.30
  -2  11  -7   -3.40    2.00
   2 -11   7   -0.30    1.80
  -3  11  -7   54.39    5.10
  -3  11  -7   45.70    6.50
  -4  11  -7   32.10    5.70
  -4  11  -7   29.00    3.90
  -5  11  -7    5.40    3.70
  -5  11  -7    9.40    2.40
  -6  11  -7   89.49   10.30
  -6  11  -7   91.99    7.40
   6  10  -7    3.00    3.50
  -6 -10   7    5.60    4.60
   5  10  -7   44.00    7.10
  -5 -10   7   44.20    7.00
   4  10  -7    0.40    3.00
   4  10  -7   -1.30    2.20
  -4 -10   7    0.30    3.10
   3  10  -7  120.39    9.10
   3  10  -7  112.59    9.70
  -3 -10   7  123.49   10.20
   2  10  -7   51.79    6.00
   2  10  -7   43.60    6.10
  -2 -10   7   59.19    6.90
   1  10  -7   62.89    6.40
   1  10  -7   72.09    6.70
  -1 -10   7   76.29    7.20
   0  10  -7  138.99    9.90
   0  10  -7  133.89   10.10
   0  10  -7  130.59    8.30
   0  10  -7  136.39    9.70
   0 -10   7  141.69   10.10
  -1  10  -7   12.50    2.20
  -1  10  -7   11.60    2.60
  -1  10  -7    6.00    3.20
  -1  10  -7    9.60    2.70
   1 -10   7    8.00    2.80
  -2  10  -7  126.89    9.00
  -2  10  -7  120.09    8.70
  -2  10  -7  114.39    9.50
  -2  10  -7  110.69    8.20
   2 -10   7  136.79    8.60
  -3  10  -7   50.39    4.90
  -3  10  -7   46.30    6.30
  -4  10  -7   81.49    8.10
  -4  10  -7   86.09    6.60
  -5  10  -7   73.49    8.80
  -5  10  -7   82.19    6.40
  -6  10  -7    2.90    3.80
  -6  10  -7   -3.50    1.80
  -7  10  -7   39.30    7.20
  -7  10  -7   48.70    5.60
   6   9  -7    3.40    3.60
  -6  -9   7    1.80    3.60
   5   9  -7   13.70    4.40
  -5  -9   7   17.70    5.00
   4   9  -7   27.90    4.20
   4   9  -7   28.50    5.40
  -4  -9   7   32.70    5.70
   3   9  -7   16.70    4.10
   3   9  -7   14.20    3.20
  -3  -9   7   17.60    2.80
  -3  -9   7   14.70    4.10
   2   9  -7   42.80    5.70
   2   9  -7   43.50    5.00
  -2  -9   7   37.20    3.40
  -2  -9   7   41.20    5.60
   1   9  -7  192.48   12.70
   1   9  -7  171.38   12.40
  -1  -9   7  200.68   13.10
   0   9  -7   -3.40    1.60
   0   9  -7   -3.40    1.80
   0   9  -7    1.80    1.90
   0   9  -7   -1.00    1.10
   0  -9   7   -1.10    2.00
  -1   9  -7  392.26   24.40
  -1   9  -7  409.86   24.00
  -1   9  -7  381.96   23.80
  -1   9  -7  382.26   23.20
   1  -9   7  462.05   24.40
  -2   9  -7    0.00    2.20
  -2   9  -7    2.00    1.70
  -2   9  -7   -0.20    1.30
  -2   9  -7    1.10    2.20
   2  -9   7    0.10    1.50
  -3   9  -7  245.08   16.50
  -3   9  -7  251.87   15.50
  -3   9  -7  249.18   15.30
   3  -9   7  243.08   14.90
  -4   9  -7    5.50    2.40
  -4   9  -7   11.10    3.70
  -5   9  -7   70.79    6.20
  -5   9  -7   83.29    9.00
  -6   9  -7   -1.10    3.00
  -6   9  -7   -2.30    1.80
  -7   9  -7    0.30    3.80
  -7   9  -7    2.10    2.30
   6   8  -7    8.70    4.40
  -6  -8   7   10.00    4.60
   5   8  -7  113.59   10.10
  -5  -8   7  118.29   10.60
   4   8  -7   -1.70    1.60
   4   8  -7   -2.80    2.60
  -4  -8   7   -1.00    1.90
  -4  -8   7   -1.00    2.60
   3   8  -7  123.09    9.80
   3   8  -7  133.59    9.00
  -3  -8   7  123.39    8.70
  -3  -8   7  114.99   10.00
   2   8  -7   17.50    3.30
   2   8  -7   23.50    4.30
  -2  -8   7   23.10    2.90
  -2  -8   7   22.30    4.30
   1   8  -7  189.48   12.40
   1   8  -7  198.58   12.40
  -1  -8   7  204.58   12.90
  -1  -8   7  167.68   11.00
   0   8  -7    2.10    1.70
   0   8  -7    0.70    1.20
   0   8  -7    0.60    1.80
   0   8  -7    0.30    1.90
   0  -8   7    1.80    2.10
  -1   8  -7   17.60    3.20
  -1   8  -7   10.10    2.60
  -1   8  -7   12.60    3.10
  -1   8  -7   15.50    2.40
   1  -8   7   13.20    3.00
  -2   8  -7   37.80    4.40
  -2   8  -7   30.60    4.50
  -2   8  -7   38.10    4.10
  -2   8  -7   29.10    4.00
   2  -8   7   34.50    4.00
  -3   8  -7   50.89    5.10
  -3   8  -7   56.79    5.10
  -3   8  -7   57.59    6.50
   3  -8   7   55.59    4.60
  -4   8  -7   23.60    3.50
  -4   8  -7   19.80    4.30
  -4   8  -7   19.80    3.20
   4  -8   7   22.20    2.90
  -5   8  -7   65.29    6.10
  -5   8  -7   87.49    8.00
  -6   8  -7    4.30    3.60
  -6   8  -7   -1.80    1.90
  -7   8  -7   81.59    9.40
  -7   8  -7   65.79    7.00
   6   7  -7   38.70    6.40
  -6  -7   7   21.50    5.30
   5   7  -7    5.70    3.30
  -5  -7   7    5.00    3.30
  -5  -7   7    3.40    2.70
   4   7  -7   47.50    4.60
   4   7  -7   68.59    7.50
  -4  -7   7   51.49    6.70
  -4  -7   7   48.80    5.50
   3   7  -7   13.20    2.80
   3   7  -7   17.60    3.80
  -3  -7   7   13.50    2.80
  -3  -7   7   11.30    3.50
   2   7  -7   71.39    6.50
   2   7  -7   70.19    5.90
  -2  -7   7   72.69    5.60
  -2  -7   7   73.09    6.80
   1   7  -7  180.38   11.80
   1   7  -7  160.18   11.90
   1   7  -7  184.18   10.60
   1   7  -7  182.28   11.60
  -1  -7   7  163.88   10.70
  -1  -7   7  184.98   12.20
   0   7  -7  120.79    8.40
   0   7  -7  113.79    8.30
   0   7  -7  122.49    8.40
   0   7  -7   99.09    7.40
   0  -7   7  124.09    8.60
  -1   7  -7  228.38   14.50
  -1   7  -7  239.38   14.00
  -1   7  -7  220.88   14.60
  -1   7  -7  234.78   14.50
   1  -7   7  225.28   14.50
  -2   7  -7   13.60    2.90
  -2   7  -7    8.70    2.40
  -2   7  -7    7.90    2.00
  -2   7  -7    8.10    2.80
   2  -7   7   11.50    2.30
  -3   7  -7  137.69    9.40
  -3   7  -7  154.88   10.60
  -3   7  -7  132.49    9.50
   3  -7   7  138.09    9.10
  -4   7  -7   99.59    7.40
  -4   7  -7   92.49    7.50
  -4   7  -7  107.39    9.00
   4  -7   7  106.19    7.10
  -5   7  -7   44.30    4.90
  -5   7  -7   40.90    6.10
  -6   7  -7  107.99    8.70
  -6   7  -7  129.89   10.60
  -7   7  -7   12.30    4.40
  -7   7  -7    2.60    2.50
   7   6  -7    1.00    3.70
  -7  -6   7    1.50    3.90
   6   6  -7   34.80    5.90
  -6  -6   7   26.70    5.70
  -6  -6   7   30.00    5.30
   5   6  -7    5.30    3.40
  -5  -6   7    7.60    3.40
  -5  -6   7    5.70    3.00
   4   6  -7    6.90    3.30
   4   6  -7    6.30    2.10
  -4  -6   7   11.50    3.50
  -4  -6   7   16.20    3.40
   3   6  -7   77.89    6.60
   3   6  -7   62.79    5.30
  -3  -6   7   63.19    5.60
  -3  -6   7   58.29    6.80
   2   6  -7  188.68   11.10
   2   6  -7  153.48   11.30
  -2  -6   7  170.08   11.70
  -2  -6   7  166.08   10.90
   1   6  -7   -1.40    1.20
   1   6  -7    1.80    1.10
   1   6  -7    1.40    1.70
   1   6  -7    1.00    1.70
  -1  -6   7    0.50    2.00
  -1  -6   7    0.00    1.50
   0   6  -7  554.84   31.80
   0   6  -7  582.94   32.40
   0   6  -7  613.84   32.50
   0   6  -7  560.44   32.30
   0  -6   7  541.85   32.40
   0  -6   7  521.05   31.60
  -1   6  -7   28.50    3.60
  -1   6  -7   24.70    3.80
  -1   6  -7   25.30    3.50
  -1   6  -7   26.50    3.20
   1  -6   7   26.50    3.70
  -2   6  -7  443.46   26.20
  -2   6  -7  499.85   26.60
  -2   6  -7  418.26   26.30
  -2   6  -7  418.16   26.80
   2  -6   7  486.15   26.30
  -3   6  -7   28.70    3.70
  -3   6  -7   27.00    3.70
  -3   6  -7   27.70    4.30
   3  -6   7   32.30    3.50
  -4   6  -7   86.79    6.90
  -4   6  -7   99.59    8.30
  -4   6  -7   83.59    6.80
   4  -6   7   93.69    6.60
  -5   6  -7   32.50    4.20
  -5   6  -7   25.90    4.90
   5  -6   7   35.10    4.00
  -6   6  -7    6.20    3.50
  -6   6  -7    4.10    2.40
  -7   6  -7   11.90    4.30
  -7   6  -7    8.20    3.10
  -8   6  -7    2.40    3.20
   7   5  -7    0.30    3.60
  -7  -5   7    1.30    3.50
  -7  -5   7    0.00    3.40
   6   5  -7   53.59    7.10
  -6  -5   7   49.70    6.60
  -6  -5   7   84.39    9.10
   5   5  -7    3.40    3.10
  -5  -5   7   -0.50    2.30
  -5  -5   7   -2.10    2.60
   4   5  -7  281.47   16.30
   4   5  -7  268.97   17.60
  -4  -5   7  273.47   17.40
  -4  -5   7  281.67   18.10
   3   5  -7   13.90    3.30
   3   5  -7   16.40    2.60
  -3  -5   7   18.70    3.80
  -3  -5   7   17.50    3.20
   2   5  -7  174.68   11.20
   2   5  -7  167.08   10.50
  -2  -5   7  146.69   11.10
  -2  -5   7  167.68   10.70
   1   5  -7   44.30    4.60
   1   5  -7   46.70    5.00
   1   5  -7   43.90    3.70
   1   5  -7   47.40    4.40
  -1  -5   7   38.30    4.20
  -1  -5   7   47.90    5.30
   0   5  -7    9.00    2.30
   0   5  -7    9.80    2.40
   0   5  -7    9.20    2.10
   0   5  -7   10.30    2.60
   0  -5   7    8.20    2.50
   0  -5   7   10.60    2.60
   0  -5   7   10.10    2.10
  -1   5  -7   27.80    3.80
  -1   5  -7   28.90    3.70
  -1   5  -7   33.30    4.00
  -1   5  -7   25.70    3.20
   1  -5   7   28.30    3.80
   1  -5   7   23.30    3.40
  -2   5  -7   29.50    3.80
  -2   5  -7   23.80    3.50
  -2   5  -7   29.80    4.20
  -2   5  -7   27.30    3.40
   2  -5   7   33.60    3.50
  -3   5  -7    8.10    2.60
  -3   5  -7    4.20    2.00
  -3   5  -7    1.30    1.80
   3  -5   7    4.90    1.70
  -4   5  -7  235.78   13.50
  -4   5  -7  194.98   14.10
  -4   5  -7  202.08   13.10
   4  -5   7  201.78   12.80
  -5   5  -7    8.30    2.50
  -5   5  -7   10.40    2.70
  -5   5  -7    3.60    3.00
   5  -5   7    7.10    2.20
  -6   5  -7  193.98   13.50
  -6   5  -7  166.68   12.10
  -7   5  -7    0.10    2.90
  -7   5  -7   -0.40    2.20
  -8   5  -7   83.79    9.20
  -7  -4   7   12.20    4.50
  -7  -4   7    7.80    4.00
   6   4  -7   11.90    3.90
  -6  -4   7    8.50    3.60
  -6  -4   7    5.40    3.50
   5   4  -7   52.59    6.30
  -5  -4   7   54.59    7.10
  -5  -4   7   54.39    6.60
   4   4  -7    6.70    2.80
   4   4  -7    0.80    1.30
  -4  -4   7    5.90    2.50
  -4  -4   7    4.10    2.70
   3   4  -7   28.80    4.20
   3   4  -7   30.40    3.30
  -3  -4   7   25.50    3.80
  -3  -4   7   31.00    4.60
   2   4  -7  178.18   10.90
   2   4  -7  166.48   11.40
  -2  -4   7  163.38   11.50
  -2  -4   7  185.88   11.30
   1   4  -7   23.70    3.30
   1   4  -7   25.60    3.00
   1   4  -7   30.20    3.40
   1   4  -7   20.20    3.20
  -1  -4   7   22.30    3.50
  -1  -4   7   23.50    3.10
  -1  -4   7   18.80    3.00
   0   4  -7  643.24   35.80
   0   4  -7  638.04   35.70
   0   4  -7  590.44   35.60
   0   4  -7  628.44   35.50
   0  -4   7  636.14   35.40
   0  -4   7  597.24   35.60
   0  -4   7  609.54   35.80
   0  -4   7  663.13   35.70
  -1   4  -7    3.40    2.00
  -1   4  -7    0.60    1.20
  -1   4  -7   -1.10    1.40
  -1   4  -7   -0.10    1.60
   1  -4   7    1.60    2.00
   1  -4   7    1.30    1.50
   1  -4   7    3.70    1.80
   1  -4   7    2.10    1.60
  -2   4  -7  501.25   28.00
  -2   4  -7  485.15   27.90
  -2   4  -7  406.56   28.10
  -2   4  -7  517.65   28.00
   2  -4   7  515.65   27.90
   2  -4   7  471.25   27.70
  -3   4  -7  205.88   12.40
  -3   4  -7  182.18   12.90
  -3   4  -7  200.58   12.40
   3  -4   7  189.98   12.00
  -4   4  -7  169.78   11.60
  -4   4  -7  180.28   12.50
  -4   4  -7  190.28   11.70
   4  -4   7  180.68   11.30
  -5   4  -7   93.99    7.00
  -5   4  -7   69.09    6.70
  -5   4  -7   89.59    7.80
   5  -4   7   85.09    6.50
  -7   4  -7   48.70    6.30
  -7   4  -7   56.59    6.80
  -8   4  -7    4.50    3.10
  -7  -3   7   33.90    6.40
  -7  -3   7   27.00    5.70
   6   3  -7   25.90    4.80
  -6  -3   7   26.10    5.20
  -6  -3   7   20.60    4.70
   5   3  -7   11.30    3.40
  -5  -3   7   11.90    3.50
   4   3  -7   62.99    4.40
   4   3  -7   71.59    6.20
  -4  -3   7   67.99    7.30
  -4  -3   7   61.69    6.10
   3   3  -7   55.99    5.70
   3   3  -7   45.80    3.80
  -3  -3   7   36.80    4.80
  -3  -3   7   43.70    5.40
   2   3  -7   93.09    6.30
   2   3  -7   86.19    6.90
  -2  -3   7   81.69    7.00
  -2  -3   7   98.89    7.80
  -2  -3   7   92.09    6.80
   1   3  -7  326.97   20.30
   1   3  -7  355.36   20.10
   1   3  -7  360.76   20.20
   1   3  -7  346.57   20.50
  -1  -3   7  355.16   20.10
  -1  -3   7  330.27   20.30
  -1  -3   7  330.97   20.60
  -1  -3   7  340.37   20.40
   0   3  -7    2.90    1.70
   0   3  -7   -0.30    1.60
   0   3  -7    0.30    1.80
   0   3  -7    3.90    1.80
   0  -3   7    1.30    1.70
   0  -3   7    3.20    2.00
   0  -3   7    3.70    1.80
   0  -3   7    4.60    2.00
  -1   3  -7  905.81   49.99
  -1   3  -7  883.51   50.09
  -1   3  -7  913.91   50.19
  -1   3  -7  880.91   50.29
   1  -3   7  865.21   49.99
   1  -3   7  895.51   50.09
   1  -3   7  887.81   50.19
   1  -3   7  904.31   49.99
  -2   3  -7   25.50    3.50
  -2   3  -7   25.20    3.80
  -2   3  -7   31.80    3.80
  -2   3  -7   32.70    3.80
   2  -3   7   33.30    3.60
   2  -3   7   38.00    4.30
   2  -3   7   31.70    3.60
  -3   3  -7  780.12   40.60
  -3   3  -7  735.63   40.60
  -3   3  -7  640.24   41.00
   3  -3   7  705.93   40.20
  -4   3  -7    6.10    2.10
  -4   3  -7    6.60    2.20
  -4   3  -7    4.90    2.30
   4  -3   7    5.30    1.90
  -5   3  -7   84.29    7.30
  -5   3  -7   78.29    6.40
  -5   3  -7   67.79    6.30
   5  -3   7   71.29    6.00
  -6   3  -7   42.70    5.40
  -6   3  -7   32.10    4.60
   6  -3   7   25.10    3.90
  -7   3  -7    9.40    3.30
  -7   3  -7    1.50    2.60
  -8   3  -7   11.80    4.00
  -7  -2   7   42.50    6.90
  -7  -2   7   36.90    6.60
   6   2  -7    1.50    2.90
  -6  -2   7    2.90    3.10
  -6  -2   7    2.10    2.70
   5   2  -7  176.78   12.20
  -5  -2   7  160.18   12.40
  -5  -2   7  183.18   12.70
   4   2  -7   -0.70    2.00
  -4  -2   7    0.10    2.00
  -4  -2   7   -1.40    1.90
   3   2  -7  290.87   16.20
   3   2  -7  297.87   17.30
  -3  -2   7  256.17   17.30
  -3  -2   7  272.07   17.20
   2   2  -7    3.30    1.50
   2   2  -7    2.70    1.80
  -2  -2   7    5.10    2.20
  -2  -2   7    6.00    2.30
  -2  -2   7    5.20    2.10
  -2  -2   7    3.50    1.40
   1   2  -7  136.79    9.20
   1   2  -7  141.99    9.00
   1   2  -7  125.89    9.00
   1   2  -7  135.79    8.90
  -1  -2   7  129.49    9.10
  -1  -2   7  139.89    9.20
  -1  -2   7  146.69    9.50
  -1  -2   7  138.19    8.80
   0   2  -7    1.00    1.70
   0   2  -7    0.40    1.50
   0   2  -7    1.40    1.80
   0   2  -7    0.80    1.50
   0  -2   7    0.10    1.70
   0  -2   7   -0.90    1.70
   0  -2   7   -1.00    1.60
   0  -2   7    0.00    1.60
  -1   2  -7    0.20    1.90
  -1   2  -7    2.00    1.80
  -1   2  -7   -1.70    1.40
  -1   2  -7   -1.80    1.50
   1  -2   7    0.00    1.70
   1  -2   7   -1.90    1.50
   1  -2   7   -1.50    1.50
   1  -2   7   -0.90    1.50
  -2   2  -7    0.70    1.60
  -2   2  -7    4.10    1.80
  -2   2  -7    1.20    1.90
  -2   2  -7    1.90    1.80
   2  -2   7    2.70    1.90
   2  -2   7    3.80    1.70
   2  -2   7    1.60    1.60
  -3   2  -7  231.08   13.20
  -3   2  -7  189.88   13.50
  -3   2  -7  246.48   13.20
   3  -2   7  205.08   12.80
   3  -2   7  176.08   13.40
  -4   2  -7   -1.70    1.70
  -4   2  -7    1.90    1.70
  -4   2  -7    3.40    2.40
   4  -2   7    2.40    1.70
  -5   2  -7  273.47   16.70
  -5   2  -7  248.28   16.60
  -5   2  -7  269.57   17.20
   5  -2   7  278.07   16.40
  -6   2  -7    0.70    2.20
  -6   2  -7    0.20    2.40
   6  -2   7   -0.50    1.80
  -7   2  -7  113.49    9.60
  -8   2  -7    0.00    3.10
  -7  -1   7   31.20    6.20
  -7  -1   7   35.20    6.10
   6   1  -7   25.00    4.60
  -6  -1   7   31.40    5.40
  -6  -1   7   25.70    5.50
   5   1  -7    5.30    2.60
  -5  -1   7    2.00    2.30
  -5  -1   7    7.00    3.00
   4   1  -7   32.20    4.40
  -4  -1   7   43.40    5.40
  -4  -1   7   31.50    4.60
   3   1  -7  104.79    7.50
   3   1  -7   97.39    6.30
  -3  -1   7  103.89    7.80
  -3  -1   7  109.39    7.70
  -3  -1   7  102.89    7.70
   2   1  -7   75.09    6.00
   2   1  -7   78.39    5.40
  -2  -1   7   81.69    5.30
  -2  -1   7   75.49    6.10
  -2  -1   7   72.79    6.00
   1   1  -7  656.53   35.90
   1   1  -7  642.14   36.10
   1   1  -7  596.74   36.00
   1   1  -7  640.54   36.20
  -1  -1   7  592.04   36.10
  -1  -1   7  649.43   35.80
  -1  -1   7  644.14   36.20
  -1  -1   7  665.53   36.30
   0   1  -7  119.89    8.40
   0   1  -7  133.29    8.50
   0   1  -7  123.69    8.50
   0   1  -7  111.59    8.30
   0  -1   7  133.29    8.60
   0  -1   7  122.69    8.50
   0  -1   7  122.39    8.60
   0  -1   7  128.89    8.40
  -1   1  -7 1165.98   64.29
  -1   1  -7 1137.79   64.49
  -1   1  -7 1111.69   64.29
  -1   1  -7 1186.48   64.49
   1  -1   7 1095.29   64.19
   1  -1   7 1198.38   64.59
   1  -1   7 1153.68   64.29
   1  -1   7 1208.28   64.49
  -2   1  -7   29.40    3.90
  -2   1  -7   27.00    3.50
  -2   1  -7   28.00    3.50
  -2   1  -7   30.30    3.40
   2  -1   7   31.00    3.60
   2  -1   7   35.30    4.10
   2  -1   7   32.40    3.60
   2  -1   7   32.30    3.90
  -3   1  -7  369.06   20.10
  -3   1  -7  294.97   20.40
  -3   1  -7  353.66   20.10
   3  -1   7  337.47   19.80
   3  -1   7  342.27   20.70
  -4   1  -7   84.89    6.30
  -4   1  -7   73.69    6.30
  -4   1  -7   74.19    6.70
   4  -1   7   86.69    6.20
  -5   1  -7   96.09    7.50
  -5   1  -7  105.79    8.10
  -5   1  -7   95.79    7.70
   5  -1   7   93.39    7.30
  -6   1  -7   94.09    8.00
   6  -1   7   90.79    7.50
  -8   1  -7   32.50    5.80
  -7   0   7   49.20    7.80
  -7   0   7   32.90    5.90
  -6   0   7   20.40    4.30
  -6   0   7   25.90    4.90
   5   0  -7   80.69    7.00
  -5   0   7   78.29    7.80
  -5   0   7   84.39    7.50
   4   0  -7   30.70    4.20
  -4   0   7   24.30    3.90
  -4   0   7   28.10    4.30
  -4   0   7   23.70    4.10
   3   0  -7  265.17   15.30
  -3   0   7  249.68   15.20
  -3   0   7  234.38   15.50
  -3   0   7  234.68   15.30
   2   0  -7  128.89    8.50
   2   0  -7  140.79    8.70
   2   0  -7  110.29    7.80
  -2   0   7  120.49    8.70
  -2   0   7  141.19    8.70
  -2   0   7  119.89    7.80
  -2   0   7  137.69    8.80
   1   0  -7  110.69    7.20
   1   0  -7  113.19    7.60
   1   0  -7  112.19    7.50
   1   0  -7  104.29    7.50
  -1   0   7   97.89    7.00
  -1   0   7  109.99    7.50
  -1   0   7  108.19    7.60
  -1   0   7  100.19    7.40
   0   0  -7 1053.79   59.59
   0   0  -7 1100.09   59.79
   0   0  -7 1072.69   59.59
   0   0  -7 1059.29   59.59
   0   0   7 1017.90   59.69
   0   0   7 1143.29   59.69
   0   0   7 1059.09   59.59
   0   0   7 1059.09   59.69
  -1   0  -7    2.60    1.60
  -1   0  -7    3.40    1.80
  -1   0  -7    3.80    1.90
  -1   0  -7    2.60    2.10
   1   0   7    3.40    1.70
   1   0   7    1.90    1.70
   1   0   7    2.00    1.70
   1   0   7    2.20    1.80
  -2   0  -7 1006.50   54.89
  -2   0  -7  934.01   54.29
  -2   0  -7  950.60   54.29
  -2   0  -7 1042.30   54.79
   2   0   7  924.61   54.19
   2   0   7 1009.00   54.69
   2   0   7  947.71   54.19
   2   0   7  990.80   54.89
  -3   0  -7   18.00    3.30
  -3   0  -7   24.30    3.60
  -3   0  -7   17.10    2.90
  -3   0  -7   21.10    3.00
   3   0   7   16.40    3.20
   3   0   7   20.40    2.90
   3   0   7   19.10    3.70
  -4   0  -7   56.09    5.50
  -4   0  -7   70.99    5.70
  -4   0  -7   53.49    5.30
   4   0   7   73.99    5.50
  -5   0  -7   67.19    6.10
  -5   0  -7   65.49    6.10
   5   0   7   61.09    5.70
  -6   0  -7   15.80    3.50
   6   0   7   11.30    3.10
  -7   0  -7   21.20    4.50
   7   0   7   28.10    5.60
  -8   0  -7    9.40    3.90
  -7   1   7    1.00    3.50
  -7   1   7    0.20    2.90
  -6   1   7   96.29    8.30
  -6   1   7   71.99    8.90
   5  -1  -7    1.00    1.90
  -5   1   7    3.30    2.70
  -5   1   7    3.70    2.30
   4  -1  -7  249.38   15.90
  -4   1   7  277.77   16.10
  -4   1   7  245.78   16.20
  -4   1   7  256.47   16.70
   3  -1  -7   10.20    2.30
  -3   1   7    3.80    2.00
  -3   1   7    6.60    1.30
  -3   1   7   12.90    3.00
  -3   1   7    8.20    2.40
   2  -1  -7  190.98   12.00
   2  -1  -7  204.98   12.20
  -2   1   7  200.78   12.20
  -2   1   7  209.38   12.40
  -2   1   7  185.98   12.50
  -2   1   7  182.28   11.50
   1  -1  -7   15.60    2.60
   1  -1  -7   18.80    2.60
   1  -1  -7   15.00    2.60
  -1   1   7   19.50    2.50
  -1   1   7   21.60    3.30
  -1   1   7   15.70    2.70
  -1   1   7   13.80    2.50
   0  -1  -7  135.39    8.60
   0  -1  -7  119.09    8.20
   0  -1  -7  121.09    8.40
   0  -1  -7  125.99    8.30
   0   1   7  116.29    8.50
   0   1   7  126.79    8.40
   0   1   7  125.89    8.30
   0   1   7  121.69    8.10
  -1  -1  -7  122.19    8.10
  -1  -1  -7  116.19    7.70
  -1  -1  -7  113.39    7.80
  -1  -1  -7  112.49    7.90
   1   1   7  101.39    7.60
   1   1   7  112.89    7.70
   1   1   7  121.29    8.00
   1   1   7  121.39    8.20
  -2  -1  -7  135.19    9.10
  -2  -1  -7  118.69    8.60
  -2  -1  -7  133.79    8.60
  -2  -1  -7  132.49    9.00
   2   1   7  126.09    8.60
   2   1   7  117.09    8.30
   2   1   7  149.39    9.20
   2   1   7  143.99    9.10
  -3  -1  -7    1.00    1.50
  -3  -1  -7   -0.80    1.50
  -3  -1  -7    0.50    1.50
  -3  -1  -7    3.30    1.80
   3   1   7    3.30    1.70
   3   1   7    3.40    1.80
   3   1   7    0.00    1.70
  -4  -1  -7  270.77   16.30
  -4  -1  -7  239.68   16.20
   4   1   7  288.17   16.30
  -5  -1  -7    5.70    2.50
   5   1   7    8.50    2.70
  -6  -1  -7  110.79    9.10
   6   1   7  111.09    8.70
  -7  -1  -7    4.50    3.00
   7   1   7   -0.90    2.10
  -8  -1  -7  123.99   11.10
  -7   2   7   13.00    4.80
  -7   2   7    8.40    3.60
  -6   2   7   15.20    3.70
  -6   2   7   24.60    5.30
   5  -2  -7   28.30    4.00
  -5   2   7   25.50    5.00
  -5   2   7   32.40    4.80
  -5   2   7   24.80    4.00
   4  -2  -7   24.80    3.70
  -4   2   7   20.30    4.20
  -4   2   7   33.30    4.00
  -4   2   7   18.90    3.40
   3  -2  -7   33.40    3.80
  -3   2   7   30.10    3.80
  -3   2   7   25.50    2.30
  -3   2   7   27.70    4.10
  -3   2   7   32.60    3.90
   2  -2  -7  241.78   13.80
   2  -2  -7  224.28   13.60
  -2   2   7  231.38   13.90
  -2   2   7  224.68   14.30
  -2   2   7  206.18   13.00
  -2   2   7  228.88   13.80
   1  -2  -7   10.30    2.30
   1  -2  -7    8.70    2.00
   1  -2  -7   12.30    2.40
  -1   2   7    7.90    1.70
  -1   2   7   10.10    2.20
  -1   2   7    9.70    2.20
  -1   2   7    9.40    2.50
   0  -2  -7 1300.67   70.69
   0  -2  -7 1370.46   71.19
   0  -2  -7 1280.97   70.59
   0   2   7 1262.27   70.69
   0   2   7 1261.57   71.09
   0   2   7 1163.48   70.59
   0   2   7 1298.97   70.59
  -1  -2  -7    1.00    1.60
  -1  -2  -7    2.60    1.60
  -1  -2  -7    0.70    1.80
   1   2   7    0.00    1.80
   1   2   7    1.70    1.40
   1   2   7    2.20    1.60
   1   2   7    0.80    1.40
  -2  -2  -7 1098.19   58.59
  -2  -2  -7 1075.29   58.69
  -2  -2  -7  982.30   58.89
   2   2   7 1074.59   59.09
   2   2   7 1058.99   58.49
   2   2   7 1066.59   58.99
   2   2   7 1028.20   58.49
  -3  -2  -7   73.09    5.90
  -3  -2  -7   65.29    5.80
  -3  -2  -7   75.79    5.80
   3   2   7   71.89    5.70
   3   2   7   75.89    5.70
   3   2   7   75.29    6.00
  -4  -2  -7  139.89   10.00
  -4  -2  -7  140.29   10.00
   4   2   7  159.48    9.90
  -5  -2  -7   20.70    3.90
   5   2   7   18.20    3.40
   6   2   7    3.50    2.50
  -7  -2  -7   22.00    4.90
   7   2   7   14.60    4.00
  -8  -2  -7   29.00    5.60
  -7   3   7    3.60    3.00
  -7   3   7   15.90    5.00
  -6   3   7   80.59    9.70
  -6   3   7   82.79    7.70
   5  -3  -7    3.80    2.20
  -5   3   7    6.70    2.50
  -5   3   7    8.80    3.20
   4  -3  -7  154.68    9.80
  -4   3   7  147.39   10.00
  -4   3   7  146.29    9.70
  -4   3   7  130.49   10.60
   3  -3  -7   60.39    4.80
  -3   3   7   52.49    4.80
  -3   3   7   52.09    4.60
  -3   3   7   53.19    5.30
  -3   3   7   47.90    3.60
   2  -3  -7  183.98   11.10
   2  -3  -7  183.68   10.80
  -2   3   7  165.58   11.10
  -2   3   7  164.58   10.40
  -2   3   7  185.08   11.70
  -2   3   7  176.08   11.00
   1  -3  -7  683.83   37.20
   1  -3  -7  703.53   37.20
   1  -3  -7  695.53   37.60
  -1   3   7  598.44   36.80
  -1   3   7  652.73   37.20
  -1   3   7  681.93   37.80
  -1   3   7  609.94   37.20
   0  -3  -7   42.20    4.10
   0  -3  -7   39.50    4.00
   0  -3  -7   40.50    4.00
   0   3   7   37.00    3.80
   0   3   7   41.80    3.60
   0   3   7   42.20    4.60
   0   3   7   32.00    3.60
  -1  -3  -7 1127.79   64.09
  -1  -3  -7 1237.08   64.89
  -1  -3  -7 1157.88   64.09
   1   3   7 1218.48   64.69
   1   3   7 1217.58   64.29
   1   3   7 1094.59   63.89
   1   3   7 1062.69   63.99
  -2  -3  -7   56.79    4.60
  -2  -3  -7   48.20    4.70
  -2  -3  -7   57.29    4.80
   2   3   7   63.19    5.20
   2   3   7   48.50    4.50
   2   3   7   50.19    4.30
   2   3   7   55.99    4.30
  -3  -3  -7  356.86   21.10
  -3  -3  -7  341.77   20.60
  -3  -3  -7  312.57   20.60
   3   3   7  355.56   20.80
   3   3   7  347.37   20.60
   3   3   7  398.16   21.20
  -4  -3  -7   75.29    6.60
   4   3   7   89.29    6.60
  -5  -3  -7   22.70    4.10
   5   3   7   17.30    3.40
  -6  -3  -7   27.20    4.70
   6   3   7   19.40    3.80
  -7  -3  -7   -2.20    2.80
   7   3   7    1.60    2.80
  -8  -3  -7   35.90    6.40
  -7   4   7   32.80    6.50
  -7   4   7   32.20    5.20
  -6   4   7    6.10    2.70
  -6   4   7    1.50    3.10
   5  -4  -7  169.38   11.40
  -5   4   7  175.58   11.80
  -5   4   7  171.18   12.90
   4  -4  -7    5.10    1.90
  -4   4   7    4.10    2.00
  -4   4   7    8.10    2.00
  -4   4   7    5.80    0.90
  -4   4   7   10.10    3.20
  -4   4   7    4.00    0.80
   3  -4  -7  401.86   22.20
  -3   4   7  387.86   22.40
  -3   4   7  374.86   21.50
  -3   4   7  357.16   23.00
   2  -4  -7   43.40    3.50
  -2   4   7   45.80    4.60
  -2   4   7   40.10    3.70
  -2   4   7   39.40    3.90
   1  -4  -7  269.67   15.30
   1  -4  -7  237.98   15.30
   1  -4  -7  278.87   16.00
  -1   4   7  268.47   15.50
  -1   4   7  235.78   15.40
  -1   4   7  268.17   16.10
   0  -4  -7    4.80    1.80
   0  -4  -7    2.40    1.80
   0  -4  -7    2.40    1.50
   0   4   7    1.00    1.40
   0   4   7    3.00    1.50
   0   4   7    6.70    2.40
  -1  -4  -7   30.60    3.50
  -1  -4  -7   25.40    3.70
  -1  -4  -7   31.40    3.40
   1   4   7   28.10    3.90
   1   4   7   30.70    3.30
   1   4   7   27.70    3.10
  -2  -4  -7   17.00    2.80
  -2  -4  -7   18.70    3.20
  -2  -4  -7   23.00    3.00
   2   4   7   18.40    2.60
   2   4   7   19.00    2.70
   2   4   7   20.50    3.20
   2   4   7   19.90    2.80
  -3  -4  -7   70.49    5.70
  -3  -4  -7   65.69    5.60
  -3  -4  -7   60.79    5.50
   3   4   7   63.39    5.30
   3   4   7   61.09    5.20
   3   4   7   59.09    5.30
  -4  -4  -7   11.30    3.00
   4   4   7    4.00    2.10
  -5  -4  -7  103.79    8.50
   5   4   7  112.29    8.30
  -6  -4  -7   -1.40    2.50
   6   4   7   -3.60    1.70
  -7  -4  -7   64.89    8.20
   7   4   7   78.29    8.10
  -8  -4  -7    8.20    4.20
  -7   5   7   14.70    4.00
  -7   5   7    9.10    4.70
  -6   5   7   15.00    4.70
  -6   5   7   16.70    3.70
  -5   5   7    6.60    3.40
  -5   5   7   11.40    2.80
   4  -5  -7    4.00    1.90
  -4   5   7    5.50    1.80
  -4   5   7    5.50    2.10
  -4   5   7    7.10    3.10
   3  -5  -7   63.89    5.00
  -3   5   7   65.19    5.20
  -3   5   7   56.79    5.80
   2  -5  -7   42.60    3.70
   2  -5  -7   39.20    3.30
  -2   5   7   41.70    3.80
  -2   5   7   37.10    5.00
  -2   5   7   37.30    3.50
   1  -5  -7  307.47   17.80
   1  -5  -7  324.87   18.80
   1  -5  -7  307.57   18.10
  -1   5   7  319.57   18.20
  -1   5   7  302.27   18.80
  -1   5   7  298.97   18.10
   0  -5  -7   20.40    3.30
   0  -5  -7   24.30    2.90
   0  -5  -7   19.90    2.60
   0   5   7   25.20    2.80
   0   5   7   18.90    2.60
   0   5   7   20.20    3.70
  -1  -5  -7  536.15   34.00
  -1  -5  -7  603.54   33.30
  -1  -5  -7  620.24   33.40
   1   5   7  590.64   33.20
   1   5   7  596.54   33.30
   1   5   7  593.24   34.00
  -2  -5  -7  106.49    7.70
  -2  -5  -7  105.89    7.30
  -2  -5  -7  100.59    7.40
   2   5   7  108.79    7.20
   2   5   7  103.69    7.70
   2   5   7  111.09    7.40
  -3  -5  -7  319.47   18.80
  -3  -5  -7  273.67   18.30
   3   5   7  327.97   18.40
  -4  -5  -7   42.80    5.30
   4   5   7   51.59    5.30
  -5  -5  -7   56.69    6.30
   5   5   7   40.90    5.20
  -6  -5  -7   13.10    4.20
   6   5   7   16.70    3.90
  -7  -5  -7   13.30    4.10
   7   5   7    9.70    3.80
  -8  -5  -7    8.30    4.60
   8   5   7    7.10    4.10
  -7   6   7   14.20    3.70
  -7   6   7   26.70    6.30
  -6   6   7    2.20    3.20
  -6   6   7    3.70    2.40
  -5   6   7   97.99    8.90
  -5   6   7   87.99    7.20
   4  -6  -7   25.90    3.20
  -4   6   7   27.40    3.30
  -4   6   7   21.70    4.30
  -4   6   7   28.60    3.70
   3  -6  -7  261.67   15.60
   3  -6  -7  280.87   15.80
  -3   6   7  238.58   16.90
  -3   6   7  278.57   16.00
   2  -6  -7   34.20    3.10
   2  -6  -7   41.30    3.30
  -2   6   7   38.60    4.90
  -2   6   7   37.30    3.50
  -2   6   7   40.10    3.70
   1  -6  -7   65.79    5.90
   1  -6  -7   77.49    5.30
   1  -6  -7   81.99    5.50
  -1   6   7   73.99    6.40
  -1   6   7   83.69    5.70
  -1   6   7   83.09    5.60
   0  -6  -7  491.65   27.00
   0  -6  -7  514.25   27.20
   0  -6  -7  487.85   27.90
   0   6   7  435.46   27.90
   0   6   7  440.06   27.00
   0   6   7  498.25   27.10
  -1  -6  -7   33.80    3.60
  -1  -6  -7   28.50    4.00
  -1  -6  -7   29.70    3.30
   1   6   7   31.70    3.40
   1   6   7   29.00    3.90
   1   6   7   31.30    3.20
  -2  -6  -7  401.16   23.30
  -2  -6  -7  421.56   23.90
   2   6   7  398.96   23.20
   2   6   7  399.36   23.10
   2   6   7  383.46   23.50
  -3  -6  -7  221.18   14.30
  -3  -6  -7  227.18   14.50
   3   6   7  237.28   14.20
  -4  -6  -7   32.20    4.50
   4   6   7   37.80    4.50
  -5  -6  -7  126.49    9.90
   5   6   7  127.59    9.50
  -6  -6  -7    5.50    3.30
   6   6   7    7.60    3.10
  -7  -6  -7   49.99    7.20
   7   6   7   61.39    7.30
  -8  -6  -7   10.40    5.00
   8   6   7   13.00    4.20
  -7   7   7   10.40    3.30
  -7   7   7    4.40    4.30
  -6   7   7   96.09   10.90
  -6   7   7   85.59    7.50
  -5   7   7    2.30    3.30
  -5   7   7    2.20    2.10
   4  -7  -7  148.39    9.40
  -4   7   7  149.88    9.70
  -4   7   7  146.89   11.70
  -4   7   7  169.08   10.20
   3  -7  -7   56.39    3.90
   3  -7  -7   53.79    3.80
  -3   7   7   47.90    6.00
  -3   7   7   55.69    4.60
   2  -7  -7  152.88    9.20
  -2   7   7  158.68    9.70
  -2   7   7  157.48   10.90
  -2   7   7  153.78    9.70
   1  -7  -7    2.70    1.70
   1  -7  -7    2.90    1.20
   1  -7  -7    1.30    1.10
  -1   7   7    1.70    1.20
  -1   7   7    4.00    2.20
  -1   7   7    2.80    1.40
   0  -7  -7   17.80    2.40
   0  -7  -7   29.80    3.10
   0  -7  -7   18.90    3.20
   0   7   7   21.30    2.60
   0   7   7   20.40    3.50
   0   7   7   19.50    2.70
  -1  -7  -7   47.30    4.10
  -1  -7  -7   51.79    5.40
  -1  -7  -7   46.20    4.00
   1   7   7   50.39    4.10
   1   7   7   46.70    4.70
   1   7   7   42.60    4.00
  -2  -7  -7   43.80    4.90
  -2  -7  -7   34.10    4.00
   2   7   7   38.60    3.80
   2   7   7   39.10    4.50
   2   7   7   43.90    4.30
  -3  -7  -7    8.50    2.60
  -3  -7  -7    3.70    2.10
   3   7   7    2.80    1.80
  -4  -7  -7  152.28   10.90
   4   7   7  159.28   10.80
  -5  -7  -7    2.90    2.80
   5   7   7   -0.70    2.10
  -6  -7  -7  124.79   10.30
   6   7   7  109.59    9.70
  -7  -7  -7    3.90    3.60
   7   7   7   -6.60    2.40
  -8  -7  -7   32.50    6.60
   8   7   7   23.90    5.80
  -7   8   7    1.10    4.10
  -7   8   7    3.10    2.70
  -6   8   7   -0.70    3.30
  -6   8   7    1.60    2.20
  -5   8   7    0.40    3.80
  -5   8   7    0.80    1.80
  -4   8   7   14.00    2.50
  -4   8   7   15.30    2.30
  -4   8   7   14.50    3.90
   3  -8  -7   13.70    1.50
   3  -8  -7   16.30    1.60
  -3   8   7   13.40    3.70
  -3   8   7   18.00    2.50
   2  -8  -7  248.18   13.90
  -2   8   7  241.08   15.80
  -2   8   7  247.98   14.40
  -2   8   7  239.38   14.30
   1  -8  -7   34.50    3.10
  -1   8   7   40.90    5.00
  -1   8   7   34.80    3.20
  -1   8   7   39.10    3.40
   0  -8  -7  558.54   29.40
   0  -8  -7  521.45   29.60
   0  -8  -7  471.95   30.10
   0   8   7  523.35   30.70
   0   8   7  537.25   29.50
   0   8   7  518.65   29.50
  -1  -8  -7    3.70    2.00
  -1  -8  -7    2.30    1.50
   1   8   7    4.70    1.70
   1   8   7    8.10    2.50
   1   8   7    2.10    1.50
  -2  -8  -7  353.86   20.50
  -2  -8  -7  329.87   19.80
   2   8   7  340.27   19.70
   2   8   7  314.27   19.90
   2   8   7  334.97   19.80
  -3  -8  -7   -0.30    1.90
  -3  -8  -7    0.00    1.70
   3   8   7    0.70    1.70
  -4  -8  -7  111.89    8.70
   4   8   7  109.69    8.30
  -5  -8  -7   15.00    3.90
   5   8   7   18.30    4.00
  -6  -8  -7    4.90    3.10
   6   8   7    2.30    2.70
  -7  -8  -7    8.00    4.60
   7   8   7    6.90    3.80
  -6   9   7   53.09    8.10
  -6   9   7   48.60    5.30
  -5   9   7   -0.20    3.00
  -5   9   7    3.00    1.90
  -4   9   7   65.89    5.20
  -4   9   7   67.79    7.90
  -3   9   7   10.70    3.40
  -3   9   7   14.30    2.10
   2  -9  -7   84.39    4.90
  -2   9   7   84.89    7.40
  -2   9   7   88.99    5.80
  -2   9   7   77.39    5.60
   1  -9  -7  152.28    9.00
  -1   9   7  138.79    9.00
  -1   9   7  136.99   10.40
  -1   9   7  155.38    9.10
   0  -9  -7    2.50    1.30
   0  -9  -7   -0.20    1.50
   0  -9  -7    2.80    1.50
   0   9   7   -0.40    1.10
   0   9   7    0.50    1.20
   0   9   7   -0.30    2.00
  -1  -9  -7  282.57   16.90
  -1  -9  -7  256.87   16.00
   1   9   7  274.97   16.10
   1   9   7  271.67   16.10
   1   9   7  270.87   16.80
  -2  -9  -7   45.40    5.40
  -2  -9  -7   48.10    4.50
   2   9   7   42.20    4.30
   2   9   7   43.40    4.90
   2   9   7   51.89    4.40
  -3  -9  -7   74.69    6.70
  -3  -9  -7   79.39    6.70
   3   9   7   85.19    6.60
  -4  -9  -7   95.79    8.20
   4   9   7   91.29    7.60
  -5  -9  -7   17.30    4.10
   5   9   7   10.00    3.20
  -6  -9  -7  130.99   10.70
   6   9   7  111.29    9.80
  -7  -9  -7    5.70    3.80
   7   9   7   -2.40    3.00
  -6  10   7    2.20    2.10
  -6  10   7    2.20    3.80
  -5  10   7   92.29    6.60
  -5  10   7   81.39    9.60
  -4  10   7   -2.00    2.80
  -4  10   7   -0.40    1.10
  -3  10   7  119.49    7.40
  -3  10   7  118.59    9.60
  -2  10   7   59.09    4.50
  -2  10   7   63.89    6.50
  -2  10   7   66.19    4.50
   1 -10  -7   99.59    6.40
   1 -10  -7  106.79    6.70
  -1  10   7  112.29    8.30
  -1  10   7  107.69    6.80
  -1  10   7  101.59    6.70
   0 -10  -7  158.88   10.90
   0 -10  -7  162.78   10.10
   0  10   7  171.38   10.30
   0  10   7  167.88   11.50
   0  10   7  168.48   10.30
  -1 -10  -7   55.49    5.20
  -1 -10  -7   56.89    4.70
   1  10   7   51.09    4.70
   1  10   7   56.29    5.20
   1  10   7   61.39    4.80
  -2 -10  -7   48.80    5.50
  -2 -10  -7   51.89    5.30
   2  10   7   51.39    4.80
   2  10   7   50.99    4.60
   2  10   7   51.89    4.70
  -3 -10  -7   88.19    7.50
  -3 -10  -7   96.59    7.50
   3  10   7   81.29    7.00
  -4 -10  -7   -0.60    2.40
   4  10   7    2.90    2.20
  -5 -10  -7   88.59    8.40
   5  10   7   81.39    7.90
  -6 -10  -7   -3.00    3.30
   6  10   7   -0.30    2.70
  -7 -10  -7   85.79   10.00
   7  10   7   95.69   10.20
  -6  11   7    4.20    4.50
  -5  11   7    7.60    1.70
  -5  11   7    0.80    3.10
  -4  11   7   -0.60    0.90
  -4  11   7   -1.00    3.30
  -3  11   7   73.39    4.80
  -3  11   7   76.79    7.40
  -2  11   7   -0.80    1.00
  -2  11   7   -0.30    0.90
  -2  11   7   -4.40    1.90
   1 -11  -7  172.68   10.80
   1 -11  -7  184.58   11.10
  -1  11   7  200.98   11.40
  -1  11   7  203.18   11.40
  -1  11   7  184.98   12.80
   0 -11  -7   -0.30    1.10
   0 -11  -7    2.50    1.90
   0  11   7    0.90    1.30
   0  11   7    2.80    2.30
   0  11   7    0.70    1.20
  -1 -11  -7  336.17   19.70
  -1 -11  -7  300.17   19.00
   1  11   7  323.67   19.60
   1  11   7  340.67   19.10
   1  11   7  315.47   19.10
  -2 -11  -7    1.20    1.80
  -2 -11  -7    4.10    2.10
   2  11   7    2.70    1.70
   2  11   7    1.30    1.90
   2  11   7    3.60    2.00
  -3 -11  -7  127.29   10.40
  -3 -11  -7  143.79   10.00
   3  11   7  134.79    9.70
  -4 -11  -7    0.70    2.70
   4  11   7    4.00    2.90
  -5 -11  -7    9.00    3.80
   5  11   7   11.20    3.70
  -6 -11  -7    3.50    3.90
   6  11   7    2.80    3.50
  -7 -11  -7    6.90    4.60
   7  11   7   -1.40    3.10
  -6  12   7    2.80    4.30
  -5  12   7   65.69    8.90
  -4  12   7   -0.70    3.10
  -3  12   7  121.39   10.00
  -3  12   7  123.39    7.20
  -2  12   7   38.40    3.00
  -2  12   7   41.40    5.80
  -2  12   7   33.20    3.10
   1 -12  -7   19.90    2.10
   1 -12  -7   21.60    1.90
  -1  12   7   30.20    4.60
  -1  12   7   20.20    2.50
  -1  12   7   20.50    2.60
   0 -12  -7   61.79    4.90
   0  12   7   64.69    5.30
   0  12   7   76.09    6.40
   0  12   7   77.09    5.40
  -1 -12  -7   23.20    3.20
  -1 -12  -7   24.70    3.50
   1  12   7   20.80    3.20
   1  12   7   27.20    3.70
   1  12   7   19.10    2.90
  -2 -12  -7   50.49    5.10
  -2 -12  -7   56.79    5.60
   2  12   7   52.19    4.60
   2  12   7   45.50    5.10
   2  12   7   45.80    5.10
  -3 -12  -7   87.49    8.00
  -3 -12  -7   91.19    7.70
   3  12   7   92.29    7.60
  -4 -12  -7   42.70    5.80
   4  12   7   27.40    4.80
  -5 -12  -7   72.19    8.20
   5  12   7   80.89    7.70
  -6 -12  -7    1.50    3.50
   6  12   7   -3.60    2.70
  -5  13   7   -2.20    3.40
  -4  13   7   39.60    6.70
  -3  13   7   13.60    4.20
  -2  13   7   68.59    4.60
  -2  13   7   66.79    7.50
  -2  13   7   67.99    4.90
   1 -13  -7   52.29    4.00
  -1  13   7   56.99    4.40
  -1  13   7   63.89    6.30
  -1  13   7   63.79    4.60
   0 -13  -7    2.00    1.40
   0  13   7    1.10    1.60
   0  13   7    2.80    1.50
   0  13   7    2.90    2.30
  -1 -13  -7    4.20    1.90
  -1 -13  -7    4.50    2.00
   1  13   7    5.60    2.20
   1  13   7    2.80    2.00
   1  13   7    5.40    2.10
  -2 -13  -7   30.90    4.80
  -2 -13  -7   30.20    4.30
   2  13   7   27.30    4.10
   2  13   7   35.60    4.60
   2  13   7   29.70    3.80
  -3 -13  -7   10.60    3.40
   3  13   7   22.70    4.10
  -4 -13  -7   79.29    8.30
   4  13   7   57.09    7.10
  -5 -13  -7    5.00    3.70
   5  13   7    3.90    3.20
  -6 -13  -7   84.79    9.60
   6  13   7   75.09    9.00
  -5  14   7   -3.60    3.50
  -4  14   7   11.70    4.50
  -3  14   7    0.70    2.90
  -2  14   7  145.79    8.90
  -2  14   7  155.68   11.50
  -1  14   7   -5.40    2.10
  -1  14   7   -0.30    1.10
   0  14   7  265.97   16.10
   0  14   7  265.47   17.10
  -1 -14  -7    2.80    2.20
   1  14   7    4.90    2.20
   1  14   7    4.40    2.10
  -2 -14  -7   87.59    7.20
   2  14   7   86.89    7.30
   2  14   7   83.19    6.40
  -3 -14  -7   -3.50    2.20
   3  14   7   -0.20    2.40
  -4 -14  -7   35.70    5.80
   4  14   7   36.00    5.70
  -5 -14  -7    1.00    3.50
   5  14   7    1.10    2.90
  -6 -14  -7    1.00    3.70
   6  14   7   -2.00    2.80
  -5  15   7   -3.40    3.40
  -4  15   7   27.00    5.70
  -3  15   7    6.00    3.30
  -2  15   7   23.00    4.80
  -2  15   7   24.60    2.40
  -1  15   7    9.00    2.00
  -1  15   7    9.00    3.70
   0  15   7    1.90    2.20
   0  15   7   -0.10    1.50
   1  15   7   14.00    2.80
   1  15   7    9.20    2.80
   2  15   7   52.79    5.90
   2  15   7   50.09    4.50
  -3 -15  -7   25.10    6.10
   3  15   7   29.50    5.10
  -4 -15  -7   65.69    7.80
   4  15   7   48.20    6.70
  -5 -15  -7    2.30    3.40
   5  15   7   -0.60    2.60
  -4  16   7    6.10    4.00
  -3  16   7   26.00    5.40
  -2  16   7   40.90    6.30
  -2  16   7   47.50    4.10
  -1  16   7    1.10    3.00
  -1  16   7   -0.20    1.40
   0  16   7   63.89    5.70
   0  16   7   67.49    6.30
   1  16   7   20.10    5.10
   1  16   7   17.70    3.40
   2  16   7   22.30    4.30
   3  16   7   59.19    7.20
   4  16   7   -4.90    2.00
   5  16   7   48.50    7.40
  -4  17   7   10.20    4.50
  -4  17   7   -1.00    2.90
  -3  17   7   49.60    7.30
  -2  17   7    1.30    3.00
  -1  17   7  108.59    7.70
  -1  17   7  119.79    9.90
   0  17   7   -0.80    1.70
   1  17   7   76.99    7.30
   2  17   7   -2.90    2.20
   3  17   7   49.40    6.60
   4  17   7    1.80    3.10
  -1  18   7    2.40    1.70
   0  18   7    6.90    2.40
   1  18   7   14.70    3.50
   2  18   7    3.50    3.10
   3  18   7   33.20    5.80
   0  19   7    0.40    2.00
   1  19   7   38.10    5.20
   2  19   7    9.40    3.60
   0  17  -8   14.30    4.60
   0  17  -8   16.90    5.20
  -1  17  -8   17.00    5.30
  -1  17  -8    6.70    3.90
   2  16  -8    9.70    4.50
   2  16  -8   12.60    5.10
   1  16  -8   30.50    6.00
   1  16  -8   27.20    6.10
   0  16  -8   10.00    4.00
   0  16  -8   13.50    4.50
  -1  16  -8    0.10    3.40
  -1  16  -8    0.00    2.90
  -2  16  -8    9.70    3.70
  -2  16  -8    7.90    4.30
  -3  16  -8   -1.60    3.60
  -3  16  -8    1.50    2.50
   3  15  -8    2.10    3.40
   3  15  -8    4.30    4.80
   2  15  -8   -0.40    2.80
   2  15  -8    1.90    3.80
   1  15  -8   48.80    7.20
   1  15  -8   54.99    7.70
   0  15  -8   -2.20    2.80
   0  15  -8   -0.60    3.00
  -1  15  -8  111.69    8.90
  -1  15  -8   79.49    9.80
  -2  15  -8    2.20    3.30
  -2  15  -8   -1.30    2.90
  -3  15  -8   52.69    8.20
  -3  15  -8   78.39    6.60
  -4  15  -8   -3.00    2.00
  -4  15  -8    0.70    3.50
   3  14  -8   64.09    8.70
   3  14  -8   65.99    8.10
  -3 -14   8   77.39   11.10
   2  14  -8    1.50    3.00
   2  14  -8   -1.60    3.20
   1  14  -8   33.10    5.70
   1  14  -8   36.00    5.80
   0  14  -8    3.30    3.10
   0  14  -8    5.20    3.30
  -1  14  -8    5.30    3.40
  -1  14  -8   11.00    3.60
  -2  14  -8   24.70    5.40
  -2  14  -8   31.30    5.10
  -3  14  -8    4.50    2.70
  -3  14  -8    2.10    3.40
  -4  14  -8    6.90    4.20
  -4  14  -8    8.70    2.70
  -5  14  -8   27.80    3.90
  -5  14  -8   29.50    6.20
   4  13  -8   42.90    7.10
  -4 -13   8   57.69    8.50
   3  13  -8    5.50    3.30
   3  13  -8    5.30    3.70
  -3 -13   8   -0.10    3.80
   2  13  -8   76.69    8.40
   2  13  -8   77.99    8.90
  -2 -13   8   71.59    8.80
   1  13  -8   70.89    8.00
   1  13  -8   60.29    7.40
  -1 -13   8   55.49    7.20
   0  13  -8   17.80    4.50
   0  13  -8   31.40    5.20
  -1  13  -8   53.29    6.50
  -1  13  -8   59.99    7.50
  -2  13  -8    7.20    3.20
  -2  13  -8    5.60    3.70
  -3  13  -8   60.29    6.40
  -3  13  -8   65.89    8.40
  -4  13  -8   38.50    7.00
  -4  13  -8   36.60    4.60
  -5  13  -8   32.30    6.70
  -5  13  -8   31.70    4.20
   5  12  -8    0.70    4.10
   4  12  -8    4.40    4.20
   4  12  -8   -1.20    2.60
  -4 -12   8   -0.40    3.70
   3  12  -8   27.50    4.90
   3  12  -8   29.80    5.90
  -3 -12   8   23.60    5.30
   2  12  -8   69.59    7.80
   2  12  -8   60.29    7.10
  -2 -12   8   48.00    6.90
   1  12  -8   16.80    4.30
   1  12  -8   17.80    4.30
  -1 -12   8   16.60    4.40
   0  12  -8  120.79    9.10
   0  12  -8   98.79    9.10
   0 -12   8  102.69    8.80
  -1  12  -8    2.30    2.60
  -1  12  -8    0.40    2.30
  -2  12  -8   97.19    8.80
  -2  12  -8   89.69    7.80
  -3  12  -8   15.00    4.30
  -3  12  -8   18.90    3.70
  -4  12  -8  120.09    8.80
  -4  12  -8  126.19   11.00
  -5  12  -8   -2.00    1.70
  -5  12  -8    5.70    4.10
  -6  12  -8   17.30    5.40
  -6  12  -8   17.20    3.50
   5  11  -8   -1.30    3.60
  -5 -11   8    0.30    3.70
   4  11  -8   92.09    7.90
   4  11  -8   84.09    9.70
  -4 -11   8   94.99   10.60
   3  11  -8   -1.60    3.20
   3  11  -8    1.10    2.50
  -3 -11   8   -2.90    3.10
   2  11  -8  137.99   10.70
   2  11  -8  150.88   11.20
  -2 -11   8  133.49   11.40
   1  11  -8    3.10    2.80
   1  11  -8    1.20    2.50
  -1 -11   8    3.50    3.10
   0  11  -8   91.69    8.00
   0  11  -8   85.29    8.30
   0 -11   8  101.09    8.30
  -1  11  -8   64.99    7.60
  -1  11  -8   70.19    7.30
   1 -11   8   78.99    6.90
  -2  11  -8   -1.20    2.40
  -2  11  -8    3.40    2.70
  -3  11  -8   43.10    5.10
  -3  11  -8   37.60    6.10
  -4  11  -8   77.29    6.50
  -4  11  -8   79.69    9.20
  -5  11  -8    8.90    4.50
  -5  11  -8    3.80    2.20
  -6  11  -8   65.49    6.20
  -6  11  -8   63.09    8.60
   5  10  -8   42.50    7.20
  -5 -10   8   47.30    7.60
   4  10  -8    1.70    2.20
   4  10  -8    1.80    3.50
  -4 -10   8    4.90    3.60
   3  10  -8   53.89    6.20
   3  10  -8   61.19    7.30
  -3 -10   8   61.09    7.70
   2  10  -8   26.20    4.30
   2  10  -8   19.30    4.20
  -2 -10   8   27.50    5.10
   1  10  -8   74.79    7.00
   1  10  -8   86.09    7.30
  -1 -10   8   76.59    7.60
   0  10  -8   68.19    6.60
   0  10  -8   77.99    6.80
   0  10  -8   63.69    7.70
   0  10  -8   69.49    5.10
   0 -10   8   71.19    6.70
  -1  10  -8    7.60    3.20
  -1  10  -8    3.10    2.30
  -1  10  -8    6.10    2.60
  -1  10  -8    6.00    1.80
   1 -10   8    8.50    2.80
  -2  10  -8  127.99    9.20
  -2  10  -8  115.09    8.60
  -2  10  -8  136.39    9.50
  -2  10  -8  115.19    9.80
   2 -10   8  135.09    9.10
  -3  10  -8   21.30    4.80
  -3  10  -8   21.30    3.60
  -4  10  -8   56.19    7.40
  -4  10  -8   48.10    5.30
  -5  10  -8   35.70    4.60
  -5  10  -8   44.70    6.90
  -6  10  -8   33.00    4.50
  -6  10  -8   36.00    6.60
   6   9  -8   17.40    5.30
  -6  -9   8    2.30    3.90
   5   9  -8   22.90    5.20
  -5  -9   8   15.00    4.80
   4   9  -8   17.30    4.70
   4   9  -8   18.50    3.50
  -4  -9   8   29.70    5.70
   3   9  -8   16.30    3.50
   3   9  -8   16.50    4.30
  -3  -9   8   25.80    4.40
  -3  -9   8   13.20    4.20
   2   9  -8    3.80    2.30
   2   9  -8    3.50    2.70
  -2  -9   8    4.90    1.80
  -2  -9   8    0.00    2.80
   1   9  -8  210.68   14.20
   1   9  -8  216.48   14.20
  -1  -9   8  218.28   14.70
   0   9  -8   12.00    3.20
   0   9  -8   12.50    3.00
   0   9  -8   10.90    3.10
   0   9  -8   15.50    2.30
   0  -9   8   10.70    3.20
  -1   9  -8  375.26   21.70
  -1   9  -8  330.27   21.90
  -1   9  -8  352.16   21.60
  -1   9  -8  337.27   20.80
   1  -9   8  388.06   21.90
  -2   9  -8    6.80    2.70
  -2   9  -8    0.30    2.30
  -2   9  -8    0.30    1.60
  -2   9  -8    3.20    2.00
   2  -9   8    3.80    2.00
  -3   9  -8  213.18   14.40
  -3   9  -8  226.98   15.70
  -3   9  -8  223.68   14.70
   3  -9   8  248.78   14.30
  -4   9  -8   23.20    4.90
  -4   9  -8   22.70    3.70
  -5   9  -8   28.20    4.00
  -5   9  -8   27.10    5.70
  -6   9  -8   14.80    3.30
  -6   9  -8   16.40    5.00
  -7   9  -8    2.50    2.60
  -7   9  -8    3.60    4.20
   6   8  -8    1.30    3.70
  -6  -8   8   -5.90    3.20
   5   8  -8   75.79    8.90
  -5  -8   8   75.09    9.10
   4   8  -8   -1.20    2.90
   4   8  -8    1.10    2.00
  -4  -8   8    4.10    3.30
  -4  -8   8   -4.50    1.90
   3   8  -8  231.28   14.30
   3   8  -8  209.48   14.90
  -3  -8   8  235.18   14.20
  -3  -8   8  199.38   15.10
   2   8  -8   20.40    3.40
   2   8  -8   23.90    4.10
  -2  -8   8   21.40    3.10
  -2  -8   8   21.80    4.20
   1   8  -8   53.19    5.00
   1   8  -8   40.90    5.20
  -1  -8   8   50.39    6.10
  -1  -8   8   40.70    3.90
   0   8  -8    0.60    2.00
   0   8  -8   -1.30    1.30
   0   8  -8   -3.00    1.50
   0   8  -8    1.90    2.00
   0  -8   8    0.50    2.00
  -1   8  -8    5.20    2.40
  -1   8  -8    4.50    1.80
  -1   8  -8    5.00    2.40
  -1   8  -8   14.00    2.80
   1  -8   8    8.60    2.60
  -2   8  -8   17.70    3.20
  -2   8  -8   17.60    3.80
  -2   8  -8   18.10    3.00
  -2   8  -8   20.60    3.70
   2  -8   8   21.00    3.50
  -3   8  -8    5.30    2.40
  -3   8  -8    8.60    2.60
  -3   8  -8    6.10    3.20
   3  -8   8   11.30    2.40
  -4   8  -8   14.30    3.00
  -4   8  -8   13.50    4.00
   4  -8   8   12.80    3.60
  -5   8  -8   90.79    8.70
  -5   8  -8   81.19    6.90
  -6   8  -8    2.00    3.50
  -6   8  -8    8.20    2.90
  -7   8  -8   88.39    7.80
  -7   8  -8   88.69   10.10
   6   7  -8    3.00    4.00
  -6  -7   8    5.50    3.80
   5   7  -8    1.20    3.00
  -5  -7   8    4.10    3.50
  -5  -7   8    4.00    2.80
   4   7  -8   41.70    4.80
   4   7  -8   40.50    6.10
  -4  -7   8   45.50    5.40
  -4  -7   8   60.59    7.70
   3   7  -8   23.50    3.60
   3   7  -8   25.60    4.50
  -3  -7   8   22.30    3.80
  -3  -7   8   32.90    5.50
   2   7  -8  130.99    8.80
   2   7  -8  110.89    8.90
  -2  -7   8  112.99    9.40
  -2  -7   8  120.49    8.30
   1   7  -8  193.98   11.20
   1   7  -8  176.78   12.20
   1   7  -8  181.08   12.00
  -1  -7   8  159.18   11.10
  -1  -7   8  195.38   12.70
   0   7  -8   65.39    5.80
   0   7  -8   54.19    5.20
   0   7  -8   60.99    5.40
   0   7  -8   52.99    4.60
   0  -7   8   47.20    5.70
   0  -7   8   58.79    4.60
  -1   7  -8  294.97   18.20
  -1   7  -8  291.87   18.40
  -1   7  -8  308.47   18.30
  -1   7  -8  270.27   17.50
   1  -7   8  316.67   18.40
  -2   7  -8   55.29    4.80
  -2   7  -8   62.69    5.50
  -2   7  -8   54.39    5.30
  -2   7  -8   47.00    6.10
   2  -7   8   55.89    5.00
  -3   7  -8  274.87   16.50
  -3   7  -8  256.57   16.20
  -3   7  -8  265.77   17.40
   3  -7   8  254.87   15.90
  -4   7  -8  109.39    8.20
  -4   7  -8   99.69    9.20
  -4   7  -8  111.69    8.40
   4  -7   8  116.59    7.70
  -5   7  -8   82.69    7.10
  -5   7  -8   90.39    8.50
  -6   7  -8   55.39    6.00
  -6   7  -8   48.40    7.20
  -7   7  -8    2.40    3.80
  -7   7  -8   -0.30    2.30
   6   6  -8   28.80    5.70
  -6  -6   8   31.30    6.30
  -6  -6   8   24.40    5.10
   5   6  -8   57.29    7.50
  -5  -6   8   57.49    6.90
  -5  -6   8   50.59    7.00
   4   6  -8   17.70    3.00
   4   6  -8   16.60    3.90
  -4  -6   8   14.10    3.40
  -4  -6   8   11.70    3.80
   3   6  -8   50.39    6.00
   3   6  -8   51.49    4.80
  -3  -6   8   50.49    6.30
  -3  -6   8   49.40    5.10
   2   6  -8  141.99   10.10
   2   6  -8  139.09    9.40
  -2  -6   8  125.79   10.20
  -2  -6   8  142.49    9.50
   1   6  -8   65.19    5.60
   1   6  -8   68.09    4.90
   1   6  -8   59.89    5.80
  -1  -6   8   52.49    5.00
  -1  -6   8   67.59    6.20
   0   6  -8  453.25   25.30
   0   6  -8  419.96   25.10
   0   6  -8  415.36   24.60
   0   6  -8  431.96   25.10
   0  -6   8  390.46   24.40
   0  -6   8  448.56   25.40
  -1   6  -8    3.50    2.10
  -1   6  -8    5.30    1.80
  -1   6  -8    4.70    2.30
  -1   6  -8    1.30    1.80
   1  -6   8    4.90    2.20
  -2   6  -8  477.25   25.60
  -2   6  -8  408.46   25.00
  -2   6  -8  397.46   25.20
  -2   6  -8  387.96   25.60
   2  -6   8  477.05   25.30
  -3   6  -8   21.20    3.40
  -3   6  -8   12.90    3.50
  -3   6  -8   21.00    3.50
   3  -6   8   21.90    3.10
  -4   6  -8  186.38   12.30
  -4   6  -8  179.48   13.40
  -4   6  -8  205.18   12.60
   4  -6   8  184.88   11.90
  -5   6  -8    6.70    3.20
  -5   6  -8    4.90    2.40
   5  -6   8    4.70    3.50
  -6   6  -8   10.90    4.00
  -6   6  -8   16.70    3.50
  -7   6  -8   14.20    3.60
  -7   6  -8   16.00    4.50
   6   5  -8   77.79    9.00
  -6  -5   8   86.99    8.50
  -6  -5   8   96.39   10.50
   5   5  -8   -2.30    2.60
  -5  -5   8    3.80    3.10
  -5  -5   8   -3.20    2.30
   4   5  -8  223.78   14.40
   4   5  -8  203.68   12.50
  -4  -5   8  198.98   14.30
  -4  -5   8  191.68   13.70
   3   5  -8    8.90    3.10
   3   5  -8    7.80    2.20
  -3  -5   8   11.90    3.00
  -3  -5   8    8.40    3.00
   2   5  -8  276.67   17.50
   2   5  -8  288.57   17.00
  -2  -5   8  263.37   17.70
  -2  -5   8  291.17   17.30
   1   5  -8   20.50    2.90
   1   5  -8   20.00    3.30
   1   5  -8   26.30    3.60
  -1  -5   8   23.80    3.90
  -1  -5   8   22.60    3.30
   0   5  -8   94.79    7.50
   0   5  -8   98.39    7.70
   0   5  -8  108.69    7.40
   0   5  -8  104.59    7.80
   0  -5   8  110.09    8.10
   0  -5   8  107.19    7.40
  -1   5  -8   -2.10    1.50
  -1   5  -8   -2.40    1.40
  -1   5  -8   -1.80    1.20
  -1   5  -8   -0.70    1.60
   1  -5   8    2.80    1.70
   1  -5   8    1.20    1.80
  -2   5  -8   52.19    5.10
  -2   5  -8   33.40    4.70
  -2   5  -8   37.20    4.40
  -2   5  -8   49.40    5.10
   2  -5   8   37.70    4.20
  -3   5  -8    4.10    2.20
  -3   5  -8    3.70    2.00
  -3   5  -8    4.00    2.50
   3  -5   8    2.50    1.70
  -4   5  -8  148.79   10.00
  -4   5  -8  130.39   10.80
  -4   5  -8  141.19   10.00
   4  -5   8  158.58    9.80
  -5   5  -8   -1.90    2.40
  -5   5  -8   -1.30    2.20
  -5   5  -8   -1.10    1.90
   5  -5   8   -0.80    1.70
  -6   5  -8  124.39    9.80
  -6   5  -8  142.29   11.30
  -7   5  -8   11.10    3.90
  -7   5  -8    4.50    2.80
  -8   5  -8   65.49    7.90
  -7  -4   8   14.10    4.80
  -7  -4   8    8.00    4.60
   6   4  -8   25.10    5.40
  -6  -4   8   13.90    4.40
  -6  -4   8   34.70    6.00
   5   4  -8    7.60    3.50
  -5  -4   8    3.90    3.00
  -5  -4   8    3.40    3.00
   4   4  -8   15.50    2.40
   4   4  -8   16.80    3.70
  -4  -4   8   20.30    4.10
  -4  -4   8   12.80    3.30
   3   4  -8   37.70    3.80
   3   4  -8   42.80    5.20
  -3  -4   8   42.80    5.10
  -3  -4   8   35.50    5.00
   2   4  -8  277.97   17.60
   2   4  -8  318.27   18.40
  -2  -4   8  319.57   18.20
  -2  -4   8  273.57   18.30
   1   4  -8   81.89    5.90
   1   4  -8   70.09    6.60
   1   4  -8   85.79    6.30
   1   4  -8   75.69    6.40
  -1  -4   8   89.59    6.90
  -1  -4   8   76.89    6.20
  -1  -4   8   79.19    6.10
   0   4  -8  538.75   31.50
   0   4  -8  590.64   31.40
   0   4  -8  553.84   31.50
   0   4  -8  560.74   31.70
   0  -4   8  538.25   31.40
   0  -4   8  557.34   31.70
   0  -4   8  483.05   31.10
  -1   4  -8    0.30    1.40
  -1   4  -8    0.40    1.80
  -1   4  -8    0.50    1.70
  -1   4  -8    0.90    1.90
   1  -4   8   -0.50    1.50
   1  -4   8   -1.00    1.50
  -2   4  -8  475.15   27.00
  -2   4  -8  443.06   26.80
  -2   4  -8  436.46   27.30
  -2   4  -8  491.35   27.10
   2  -4   8  464.15   26.80
  -3   4  -8   21.40    3.20
  -3   4  -8   18.30    3.20
  -3   4  -8   19.90    3.80
   3  -4   8   17.90    2.90
  -4   4  -8  238.68   13.80
  -4   4  -8  191.58   13.40
  -4   4  -8  218.98   14.50
   4  -4   8  204.28   13.20
  -5   4  -8   60.49    6.30
  -5   4  -8   84.59    7.40
  -5   4  -8   79.29    6.60
   5  -4   8   81.39    6.20
  -6   4  -8   50.79    6.00
  -7   4  -8   76.59    7.80
  -7   4  -8   95.49    9.00
  -8   4  -8    5.60    3.50
  -7  -3   8   24.40    5.70
  -7  -3   8   32.90    6.30
   6   3  -8   26.70    5.30
  -6  -3   8   54.79    7.20
  -6  -3   8   45.80    6.80
   5   3  -8    1.10    2.60
  -5  -3   8    6.20    3.10
  -5  -3   8    7.90    3.10
   4   3  -8   84.69    7.40
   4   3  -8   76.89    5.30
  -4  -3   8   77.89    7.30
  -4  -3   8   87.99    7.40
   3   3  -8   42.70    5.00
   3   3  -8   39.50    3.80
  -3  -3   8   43.40    5.40
  -3  -3   8   42.30    5.10
   2   3  -8   90.29    6.40
   2   3  -8   81.29    6.80
  -2  -3   8   90.49    6.90
  -2  -3   8   83.69    7.00
   1   3  -8  378.76   23.90
   1   3  -8  419.06   23.90
   1   3  -8  395.76   24.10
   1   3  -8  435.86   23.90
  -1  -3   8  402.46   24.60
  -1  -3   8  377.76   24.10
  -1  -3   8  420.56   24.00
  -1  -3   8  425.56   23.70
   0   3  -8   57.29    5.40
   0   3  -8   57.19    5.20
   0   3  -8   63.39    5.10
   0   3  -8   59.19    5.40
   0  -3   8   59.49    5.20
   0  -3   8   64.29    5.30
   0  -3   8   61.89    5.30
   0  -3   8   68.09    5.60
  -1   3  -8 1171.38   64.29
  -1   3  -8 1170.18   64.39
  -1   3  -8 1156.08   64.59
  -1   3  -8 1106.29   64.29
   1  -3   8 1170.68   64.39
   1  -3   8 1168.68   64.49
   1  -3   8 1119.49   64.19
   1  -3   8 1150.18   64.39
  -2   3  -8   29.90    4.40
  -2   3  -8   32.00    4.10
  -2   3  -8   33.00    4.10
  -2   3  -8   38.40    4.40
   2  -3   8   34.00    3.80
  -3   3  -8  242.78   17.90
  -3   3  -8  298.27   17.70
  -3   3  -8  323.77   17.80
   3  -3   8  294.07   17.40
  -4   3  -8   20.50    3.40
  -4   3  -8   27.10    3.90
  -4   3  -8   26.20    4.40
   4  -3   8   26.40    3.50
  -5   3  -8   63.29    6.30
  -5   3  -8   77.69    7.30
  -5   3  -8   78.49    6.50
   5  -3   8   65.89    5.90
  -6   3  -8   32.60    5.30
  -6   3  -8   43.70    5.50
   6  -3   8   43.00    5.20
  -7   3  -8   10.30    3.50
  -7   3  -8    6.20    2.90
  -8   3  -8    5.00    3.50
  -7  -2   8   60.79    8.60
  -7  -2   8   45.60    7.50
   6   2  -8   -3.30    2.60
  -6  -2   8    3.60    3.40
  -6  -2   8   -2.20    3.00
   5   2  -8  170.48   12.00
  -5  -2   8  162.78   12.20
  -5  -2   8  158.88   12.10
   4   2  -8   -3.20    2.00
  -4  -2   8    0.90    2.60
  -4  -2   8    0.50    2.30
   3   2  -8  310.17   18.70
   3   2  -8  355.76   20.00
  -3  -2   8  325.17   20.00
  -3  -2   8  316.17   20.00
   2   2  -8    2.50    2.00
   2   2  -8    2.50    1.50
  -2  -2   8   -1.00    1.20
  -2  -2   8    2.00    2.10
  -2  -2   8    0.40    1.80
   1   2  -8  302.27   18.00
   1   2  -8  294.97   18.00
   1   2  -8  269.97   18.00
   1   2  -8  305.67   18.30
  -1  -2   8  282.57   18.20
  -1  -2   8  328.07   18.50
  -1  -2   8  316.47   17.90
  -1  -2   8  308.37   18.30
   0   2  -8   20.90    3.30
   0   2  -8   21.20    3.30
   0   2  -8   22.70    3.40
   0   2  -8   17.20    2.90
   0  -2   8   22.40    3.60
   0  -2   8   15.50    3.10
   0  -2   8   18.10    3.00
   0  -2   8   16.60    2.90
  -1   2  -8   -0.90    1.40
  -1   2  -8   -1.80    1.50
  -1   2  -8    0.60    1.80
  -1   2  -8   -1.30    1.90
   1  -2   8    0.10    1.80
   1  -2   8   -2.70    1.50
   1  -2   8    0.10    1.60
   1  -2   8   -2.10    1.40
  -2   2  -8    3.40    1.90
  -2   2  -8    4.20    1.90
  -2   2  -8    3.90    2.00
  -2   2  -8    1.80    2.10
   2  -2   8    4.80    1.80
   2  -2   8    4.80    2.30
   2  -2   8    3.40    1.80
  -3   2  -8  132.89    9.50
  -3   2  -8  124.29    8.90
  -3   2  -8  130.69    8.90
   3  -2   8  125.19    8.60
  -4   2  -8    6.60    2.50
  -4   2  -8    5.80    2.20
  -4   2  -8    5.00    2.50
   4  -2   8    5.10    2.10
  -5   2  -8  187.38   12.80
  -5   2  -8  158.38   12.00
  -5   2  -8  180.78   12.10
   5  -2   8  202.78   12.10
  -6   2  -8    0.70    2.50
  -6   2  -8    0.70    2.40
   6  -2   8    2.20    2.30
  -7   2  -8  117.49    9.80
  -8   2  -8   -5.00    2.80
  -7  -1   8   31.30    6.00
  -7  -1   8   22.90    5.20
   6   1  -8    9.70    3.40
  -6  -1   8    8.60    3.60
  -6  -1   8    9.70    3.90
   5   1  -8   10.50    3.20
   4   1  -8   60.29    6.00
  -4  -1   8   67.69    7.30
  -4  -1   8   67.39    7.30
   3   1  -8   75.59    5.30
   3   1  -8   87.59    6.70
  -3  -1   8   74.79    6.70
  -3  -1   8   85.19    6.90
   2   1  -8  165.88   10.40
   2   1  -8  174.78   11.10
  -2  -1   8  174.98   10.40
  -2  -1   8  165.98   11.20
  -2  -1   8  156.08   11.20
   1   1  -8  634.94   35.60
   1   1  -8  614.74   35.80
   1   1  -8  630.44   35.90
   1   1  -8  641.34   35.90
  -1  -1   8  655.43   35.50
  -1  -1   8  619.34   36.00
  -1  -1   8  580.44   35.90
  -1  -1   8  643.84   36.10
   0   1  -8    5.70    2.10
   0   1  -8    3.40    2.00
   0   1  -8    4.20    1.90
   0   1  -8    1.70    1.70
   0  -1   8    2.00    1.90
   0  -1   8    2.30    2.10
   0  -1   8    1.30    2.00
   0  -1   8    3.50    2.10
  -1   1  -8  808.02   47.90
  -1   1  -8  828.12   47.80
  -1   1  -8  864.31   47.90
  -1   1  -8  891.11   48.00
   1  -1   8  843.62   47.90
   1  -1   8  867.41   48.10
   1  -1   8  834.82   47.80
   1  -1   8  853.81   47.90
  -2   1  -8    9.40    2.40
  -2   1  -8    7.50    2.40
  -2   1  -8   11.80    2.60
  -2   1  -8   10.40    2.30
   2  -1   8   10.10    2.50
   2  -1   8   13.50    2.90
   2  -1   8   12.90    2.40
   2  -1   8    9.60    2.20
  -3   1  -8  482.15   27.80
  -3   1  -8  484.15   27.00
  -3   1  -8  462.55   27.00
   3  -1   8  436.86   26.70
  -4   1  -8   49.50    4.60
  -4   1  -8   40.50    5.20
  -4   1  -8   33.20    4.70
   4  -1   8   48.70    4.90
  -5   1  -8   83.19    6.70
  -5   1  -8   79.59    7.00
  -5   1  -8   69.09    6.30
   5  -1   8   56.99    5.80
  -6   1  -8   36.20    5.20
   6  -1   8   27.10    4.40
  -8   1  -8    6.10    3.70
  -7   0   8   46.20    7.20
  -7   0   8   56.59    8.40
  -6   0   8   18.50    4.80
  -6   0   8   12.70    3.80
   5   0  -8  181.08   12.90
  -5   0   8  190.18   13.70
  -5   0   8  203.08   13.70
   4   0  -8    3.20    2.00
  -4   0   8    4.30    2.30
  -4   0   8    5.70    2.50
   3   0  -8  189.98   11.50
  -3   0   8  173.68   11.50
  -3   0   8  154.48   11.60
  -3   0   8  169.68   11.50
   2   0  -8  226.68   13.00
   2   0  -8  189.58   12.10
  -2   0   8  200.38   12.80
  -2   0   8  204.68   13.10
  -2   0   8  188.88   12.00
  -2   0   8  211.98   13.10
   1   0  -8   58.99    5.20
   1   0  -8   66.39    5.20
   1   0  -8   65.89    5.40
   1   0  -8   60.49    5.00
  -1   0   8   61.49    5.40
  -1   0   8   57.79    5.30
  -1   0   8   61.19    4.90
  -1   0   8   65.89    5.50
   0   0  -8  834.62   48.10
   0   0  -8  882.11   48.40
   0   0  -8  860.81   48.10
   0   0  -8  838.32   48.10
   0   0   8  825.92   48.30
   0   0   8  891.71   48.10
   0   0   8  868.51   48.20
   0   0   8  840.22   48.20
  -1   0  -8    1.60    1.60
  -1   0  -8    4.70    2.10
  -1   0  -8    3.70    2.20
  -1   0  -8    3.40    2.00
   1   0   8    1.30    2.00
   1   0   8    4.00    2.00
   1   0   8    3.90    2.00
   1   0   8    2.20    1.80
  -2   0  -8  151.58    9.50
  -2   0  -8  140.99    9.70
  -2   0  -8  139.49    9.60
  -2   0  -8  145.89    9.90
   2   0   8  129.49    9.80
   2   0   8  144.59    9.40
   2   0   8  138.29    9.30
   2   0   8  155.98    9.90
  -3   0  -8   33.90    3.80
  -3   0  -8   35.90    4.30
  -3   0  -8   21.00    3.70
   3   0   8   24.60    3.30
  -4   0  -8  177.38   12.30
  -4   0  -8  191.58   11.70
  -4   0  -8  160.08   11.70
   4   0   8  184.58   11.60
  -5   0  -8   40.10    4.90
  -5   0  -8   35.80    4.80
   5   0   8   37.00    4.50
  -6   0  -8   31.70    4.80
   6   0   8   25.40    4.20
  -7   0  -8   29.40    5.20
   7   0   8   35.70    7.30
  -8   0  -8   13.90    4.50
  -7   1   8    5.60    4.40
  -7   1   8    5.40    3.60
  -6   1   8   96.59    8.70
  -6   1   8   76.69    9.20
   5  -1  -8    3.50    2.50
  -5   1   8    4.70    3.10
  -5   1   8   10.30    3.20
   4  -1  -8  188.38   11.90
  -4   1   8  177.28   11.90
  -4   1   8  175.28   12.10
  -4   1   8  166.08   12.50
   3  -1  -8   -1.50    1.70
  -3   1   8    0.30    1.80
  -3   1   8    4.00    2.50
  -3   1   8    0.10    1.80
  -3   1   8   -3.50    1.10
   2  -1  -8  507.15   28.00
  -2   1   8  455.55   28.30
  -2   1   8  479.95   27.30
  -2   1   8  486.35   28.20
  -2   1   8  484.65   28.00
   1  -1  -8   85.69    6.40
   1  -1  -8   87.09    6.60
   1  -1  -8   79.89    6.00
   1  -1  -8   86.59    6.50
  -1   1   8   83.59    6.80
  -1   1   8   91.19    6.10
  -1   1   8   86.69    6.50
  -1   1   8   79.89    6.40
   0  -1  -8   81.29    6.30
   0  -1  -8   92.99    6.70
   0  -1  -8   88.89    6.50
   0  -1  -8   87.99    6.60
   0   1   8   88.09    6.80
   0   1   8   75.59    6.40
   0   1   8   83.79    6.20
   0   1   8   84.79    6.50
  -1  -1  -8    3.00    1.90
  -1  -1  -8    4.60    2.10
  -1  -1  -8    1.30    1.80
  -1  -1  -8    6.50    2.30
   1   1   8    2.90    1.80
   1   1   8    3.70    1.90
   1   1   8    2.70    2.10
   1   1   8    3.10    1.90
  -2  -1  -8   78.69    6.10
  -2  -1  -8   79.99    6.30
  -2  -1  -8   85.99    6.50
  -2  -1  -8   83.19    6.00
   2   1   8   71.39    5.80
   2   1   8   66.09    6.00
   2   1   8   73.19    6.20
   2   1   8   78.79    5.80
  -3  -1  -8   61.79    5.60
  -3  -1  -8   59.09    5.20
  -3  -1  -8   60.99    5.40
   3   1   8   66.29    6.30
   3   1   8   58.29    4.90
  -4  -1  -8  129.99    8.90
  -4  -1  -8  120.29    9.00
   4   1   8  125.49    8.70
  -5  -1  -8    0.10    2.10
   5   1   8   -1.90    1.80
  -6  -1  -8  236.08   16.30
   6   1   8  256.17   16.10
  -7  -1  -8    7.40    3.50
   7   1   8   -1.40    2.00
  -8  -1  -8  126.49   11.40
  -7   2   8    8.40    4.40
  -7   2   8   10.40    3.70
  -6   2   8   28.40    5.70
  -6   2   8   25.00    4.70
   5  -2  -8   13.70    3.20
  -5   2   8   11.70    3.30
  -5   2   8   17.60    4.60
   4  -2  -8   13.20    2.90
  -4   2   8   11.20    2.70
  -4   2   8   12.90    2.90
   3  -2  -8   61.39    5.20
  -3   2   8   49.80    4.00
  -3   2   8   61.29    5.40
  -3   2   8   56.09    5.60
   2  -2  -8  398.16   21.30
  -2   2   8  351.36   21.20
  -2   2   8  357.16   21.30
  -2   2   8  346.27   21.70
  -2   2   8  343.07   20.50
   1  -2  -8  221.88   14.80
   1  -2  -8  245.98   14.90
   1  -2  -8  262.77   15.30
  -1   2   8  251.97   15.10
  -1   2   8  241.88   15.30
  -1   2   8  224.08   14.40
  -1   2   8  263.17   15.10
   0  -2  -8 1413.26   78.59
   0  -2  -8 1527.05   79.19
   0  -2  -8 1356.76   78.49
   0   2   8 1384.86   78.99
   0   2   8 1352.36   78.59
   0   2   8 1457.15   78.49
   0   2   8 1441.16   78.59
  -1  -2  -8    0.70    1.50
  -1  -2  -8   -0.10    1.70
  -1  -2  -8    2.10    2.00
   1   2   8    2.30    1.70
   1   2   8    0.40    1.90
   1   2   8    0.00    1.40
   1   2   8    0.90    1.70
  -2  -2  -8  646.84   36.50
  -2  -2  -8  632.64   37.00
  -2  -2  -8  681.33   36.70
   2   2   8  580.34   36.70
   2   2   8  599.34   36.30
   2   2   8  647.14   36.50
   2   2   8  730.73   37.30
  -3  -2  -8    1.50    1.90
  -3  -2  -8    4.10    1.90
   3   2   8    3.80    3.50
   3   2   8   -0.50    1.60
  -4  -2  -8   52.99    5.70
   4   2   8   51.09    5.40
  -5  -2  -8   31.00    4.70
   5   2   8   28.10    4.20
   6   2   8   33.30    4.70
  -7  -2  -8   28.20    5.20
   7   2   8   22.90    4.60
  -8  -2  -8   40.40    6.50
  -7   3   8   31.50    5.70
  -7   3   8   31.10    6.30
  -6   3   8   91.19    8.10
  -6   3   8   85.09   10.00
   5  -3  -8    3.60    2.20
  -5   3   8    5.50    2.50
   4  -3  -8  164.28   10.90
  -4   3   8  160.68   12.00
  -4   3   8  168.18   11.00
  -4   3   8  165.68   11.30
   3  -3  -8   92.19    6.60
  -3   3   8   83.59    6.70
  -3   3   8   81.39    7.20
  -3   3   8   79.59    5.50
   2  -3  -8  249.88   14.90
  -2   3   8  233.48   14.20
  -2   3   8  249.97   15.00
  -2   3   8  256.67   15.70
  -2   3   8  226.78   14.80
   1  -3  -8  364.56   22.50
   1  -3  -8  403.66   22.70
   1  -3  -8  406.46   23.10
  -1   3   8  368.96   22.20
  -1   3   8  395.56   23.20
  -1   3   8  357.46   22.70
  -1   3   8  426.96   22.90
   0  -3  -8   23.20    3.20
   0  -3  -8   22.30    3.20
   0  -3  -8   20.60    3.50
   0   3   8   18.50    3.00
   0   3   8   24.60    3.20
   0   3   8   20.50    2.80
   0   3   8   20.70    3.50
  -1  -3  -8  297.97   16.90
  -1  -3  -8  249.88   17.30
  -1  -3  -8  279.57   16.80
   1   3   8  277.97   16.80
   1   3   8  283.77   17.40
   1   3   8  296.57   17.00
   1   3   8  290.27   16.80
  -2  -3  -8   86.19    6.20
  -2  -3  -8   78.99    6.20
  -2  -3  -8   92.19    6.80
   2   3   8   82.59    6.10
   2   3   8   87.49    6.40
   2   3   8   78.89    5.90
   2   3   8   75.89    6.50
  -3  -3  -8   46.20    4.70
  -3  -3  -8   39.50    4.50
   3   3   8   40.40    4.50
  -4  -3  -8   27.90    4.20
   4   3   8   34.20    4.20
  -5  -3  -8    3.50    2.40
   5   3   8    1.00    2.10
  -6  -3  -8  133.69   10.70
   6   3   8  146.49   10.50
  -7  -3  -8    2.80    3.20
   7   3   8    1.00    2.70
  -8  -3  -8   74.29    9.10
  -7   4   8   65.69    9.40
  -7   4   8   65.49    7.90
  -6   4   8   -3.90    2.80
  -6   4   8    1.10    2.50
  -5   4   8  162.78   11.60
  -5   4   8  166.88   12.90
   4  -4  -8    5.60    2.10
  -4   4   8    2.10    0.90
  -4   4   8    3.90    1.90
  -4   4   8    5.20    2.90
  -4   4   8    4.70    2.10
   3  -4  -8  265.77   15.80
  -3   4   8  248.08   14.90
  -3   4   8  251.37   16.70
  -3   4   8  275.17   16.10
   2  -4  -8   15.30    2.70
  -2   4   8    7.50    1.70
  -2   4   8   10.30    2.20
  -2   4   8   12.80    2.60
  -2   4   8   12.60    3.10
   1  -4  -8  115.09    7.70
   1  -4  -8  106.39    7.60
   1  -4  -8  112.89    8.10
  -1   4   8  112.89    8.30
  -1   4   8  114.49    7.90
  -1   4   8  111.69    7.70
   0  -4  -8   40.40    4.10
   0  -4  -8   38.90    4.60
   0  -4  -8   42.40    4.10
   0   4   8   36.30    3.50
   0   4   8   31.40    3.70
   0   4   8   32.60    4.50
  -1  -4  -8   74.19    5.70
  -1  -4  -8   61.79    6.00
  -1  -4  -8   75.99    5.70
   1   4   8   70.79    6.20
   1   4   8   79.69    5.70
   1   4   8   75.89    5.50
   1   4   8   77.89    5.70
  -2  -4  -8   38.10    4.20
  -2  -4  -8   27.80    4.10
  -2  -4  -8   34.70    4.00
   2   4   8   36.10    4.00
   2   4   8   39.80    4.70
   2   4   8   34.60    3.70
   2   4   8   36.60    3.90
  -3  -4  -8   66.09    5.70
   3   4   8   62.99    5.40
  -4  -4  -8    2.30    2.20
   4   4   8    0.10    1.70
  -5  -4  -8  180.38   12.60
   5   4   8  180.28   12.30
  -6  -4  -8    4.90    2.90
   6   4   8   -1.60    2.20
  -7  -4  -8  155.08   11.90
   7   4   8  130.99   11.00
  -8  -4  -8   12.10    4.40
  -7   5   8   11.10    3.60
  -7   5   8   14.90    5.30
  -6   5   8   -2.40    2.20
  -6   5   8   -3.10    3.10
  -5   5   8   17.60    3.40
  -5   5   8   11.00    4.00
   4  -5  -8    7.50    2.30
  -4   5   8    8.40    3.20
  -4   5   8    8.70    1.50
  -4   5   8   12.50    2.80
  -4   5   8    9.20    2.30
   3  -5  -8   72.89    5.70
  -3   5   8   69.19    5.80
  -3   5   8   68.89    6.60
   2  -5  -8   34.30    3.20
   2  -5  -8   32.70    3.60
  -2   5   8   36.00    3.80
  -2   5   8   27.50    3.60
  -2   5   8   38.90    5.10
   1  -5  -8  455.15   27.30
   1  -5  -8  496.85   27.10
   1  -5  -8  497.25   28.10
  -1   5   8  463.95   27.30
  -1   5   8  474.05   28.10
  -1   5   8  473.45   27.40
   0  -5  -8    4.20    1.80
   0  -5  -8    4.10    1.70
   0  -5  -8    5.90    2.20
   0   5   8    2.60    2.30
   0   5   8    4.00    1.70
   0   5   8    3.40    1.60
  -1  -5  -8  702.03   38.70
  -1  -5  -8  737.63   38.90
  -1  -5  -8  656.93   39.60
   1   5   8  678.13   38.80
   1   5   8  691.13   38.70
   1   5   8  658.03   39.40
  -2  -5  -8   -2.00    1.60
  -2  -5  -8    0.20    1.50
   2   5   8    0.40    1.50
   2   5   8    1.10    1.70
   2   5   8   -0.70    1.30
  -3  -5  -8  270.07   17.60
   3   5   8  300.27   17.90
   3   5   8  296.27   17.50
  -4  -5  -8   -3.40    1.70
   4   5   8    2.50    2.00
  -5  -5  -8   30.00    4.80
   5   5   8   26.60    4.10
  -6  -5  -8    1.30    2.80
   6   5   8    6.20    3.00
  -7  -5  -8   16.30    4.40
   7   5   8    7.40    3.20
  -8  -5  -8   -1.70    3.30
   8   5   8   -3.30    3.00
  -7   6   8   29.50    6.80
  -7   6   8   48.80    6.40
  -6   6   8    8.70    4.10
  -6   6   8    2.60    2.40
  -5   6   8  165.78   11.00
  -5   6   8  140.89   12.10
   4  -6  -8    1.40    1.70
  -4   6   8    0.10    1.50
  -4   6   8    2.90    1.90
  -4   6   8   -0.90    2.50
   3  -6  -8  112.99    7.70
  -3   6   8  113.89    9.20
  -3   6   8  117.69    8.10
   2  -6  -8  133.09    8.50
   2  -6  -8  125.79    8.40
  -2   6   8  134.99    8.90
  -2   6   8  139.79   10.00
  -2   6   8  140.89    8.80
   1  -6  -8   27.70    3.10
   1  -6  -8   22.40    3.00
  -1   6   8   34.20    3.60
  -1   6   8   29.10    3.40
  -1   6   8   24.80    4.00
   0  -6  -8  297.57   20.50
   0  -6  -8  331.17   19.90
   0  -6  -8  348.67   19.80
   0   6   8  342.07   19.90
   0   6   8  377.56   20.00
   0   6   8  355.86   21.00
  -1  -6  -8   59.39    4.80
  -1  -6  -8   54.89    4.70
  -1  -6  -8   62.49    5.70
   1   6   8   53.39    5.50
   1   6   8   51.99    4.50
   1   6   8   59.89    4.70
  -2  -6  -8   84.59    6.70
  -2  -6  -8   75.99    6.10
   2   6   8   79.09    6.00
   2   6   8   74.39    5.90
   2   6   8   82.39    6.60
  -3  -6  -8  106.59    7.60
   3   6   8   89.89    7.40
   3   6   8  104.19    7.30
  -4  -6  -8   64.09    6.60
   4   6   8   58.39    5.60
  -5  -6  -8  177.08   12.70
   5   6   8  177.78   12.20
  -6  -6  -8    1.00    2.90
   6   6   8    4.10    2.70
  -7  -6  -8   98.59   10.50
   7   6   8   97.69    9.00
  -8  -6  -8   18.60    5.70
   8   6   8    4.70    4.00
  -7   7   8    0.10    4.50
  -7   7   8    7.00    3.40
  -6   7   8   74.79    7.20
  -6   7   8   78.89   10.00
  -5   7   8    2.00    2.00
  -5   7   8   -1.10    3.00
  -4   7   8  144.09    9.80
  -4   7   8  158.48   10.20
  -4   7   8  145.09   11.50
   3  -7  -8    0.90    0.80
  -3   7   8   -1.30    2.20
  -3   7   8    0.30    1.50
   2  -7  -8  163.58   10.10
   2  -7  -8  168.78   10.10
  -2   7   8  164.38   11.80
  -2   7   8  170.18   10.60
  -2   7   8  172.28   10.60
   1  -7  -8  176.08   10.00
   1  -7  -8  150.48   10.20
  -1   7   8  169.48   10.40
  -1   7   8  164.48   11.30
  -1   7   8  159.28   10.20
   0  -7  -8   20.30    2.80
   0  -7  -8   18.30    2.50
   0  -7  -8   10.10    2.70
   0   7   8   15.20    2.40
   0   7   8   14.70    3.30
   0   7   8   15.10    2.50
  -1  -7  -8  104.09    6.90
  -1  -7  -8   92.29    7.50
   1   7   8   92.39    7.60
   1   7   8   89.79    6.70
   1   7   8  105.89    6.80
  -2  -7  -8   76.99    5.90
  -2  -7  -8   73.29    6.40
   2   7   8   70.69    6.00
   2   7   8   67.69    5.50
   2   7   8   71.29    5.60
  -3  -7  -8   44.50    5.00
   3   7   8   36.00    4.40
   3   7   8   46.00    5.10
  -4  -7  -8  117.99    9.10
   4   7   8  118.19    8.70
  -5  -7  -8   -1.40    2.30
   5   7   8   -1.00    2.00
  -6  -7  -8  130.99   10.70
   6   7   8  110.69    9.70
  -7  -7  -8    8.00    3.90
   7   7   8    2.50    3.10
  -8  -7  -8   72.99    9.70
   8   7   8   49.20    7.60
  -6   8   8    0.90    2.10
  -6   8   8   -1.10    3.20
  -5   8   8   -2.90    3.20
  -5   8   8   -2.00    1.60
  -4   8   8   37.60    4.20
  -4   8   8   38.20    5.90
   3  -8  -8    3.00    1.20
   3  -8  -8    7.20    1.80
  -3   8   8    3.90    1.50
  -3   8   8    3.00    2.80
  -3   8   8    5.30    1.90
   2  -8  -8  226.58   13.40
  -2   8   8  230.78   13.80
  -2   8   8  229.88   13.80
  -2   8   8  237.08   15.30
   1  -8  -8   16.80    2.30
   1  -8  -8   15.90    2.10
  -1   8   8   14.10    2.20
  -1   8   8   11.90    3.30
  -1   8   8   15.70    2.40
   0  -8  -8  419.46   23.40
   0  -8  -8  455.65   24.70
   0  -8  -8  388.86   24.40
   0   8   8  377.06   23.40
   0   8   8  409.56   24.80
   0   8   8  418.46   23.60
  -1  -8  -8    1.90    1.80
  -1  -8  -8    3.00    1.70
   1   8   8    2.00    2.20
   1   8   8   -2.00    1.30
   1   8   8    0.00    1.40
  -2  -8  -8  369.66   23.50
  -2  -8  -8  415.66   24.60
   2   8   8  401.26   23.60
   2   8   8  434.76   24.20
   2   8   8  400.56   23.50
  -3  -8  -8   14.80    3.30
   3   8   8   15.40    3.10
   3   8   8   12.60    2.70
  -4  -8  -8   71.29    6.90
   4   8   8   73.09    6.50
  -5  -8  -8    0.00    2.80
   5   8   8    0.40    2.40
  -6  -8  -8    0.30    2.60
   6   8   8    0.40    2.50
  -7  -8  -8   -4.30    2.80
   7   8   8    1.10    2.90
  -6   9   8   43.80    5.30
  -6   9   8   65.39    9.00
  -5   9   8    6.50    2.30
  -5   9   8    5.20    3.50
  -4   9   8  162.38   13.00
  -4   9   8  182.28   11.20
   3  -9  -8   37.60    2.60
  -3   9   8   40.80    6.20
  -3   9   8   38.50    3.70
   2  -9  -8  127.59    7.80
  -2   9   8  130.29    8.40
  -2   9   8  142.69   10.30
  -2   9   8  127.49    8.30
   1  -9  -8  181.78   10.60
  -1   9   8  168.88   10.60
  -1   9   8  165.58   10.60
  -1   9   8  171.78   12.00
   0  -9  -8   26.00    2.90
   0   9   8   23.00    3.00
   0   9   8   27.00    4.40
   0   9   8   26.00    3.10
  -1  -9  -8  148.19    9.20
  -1  -9  -8  131.19    9.90
   1   9   8  130.09    9.90
   1   9   8  147.79    9.20
   1   9   8  141.29    9.20
  -2  -9  -8   32.90    4.80
  -2  -9  -8   31.20    4.10
   2   9   8   38.00    4.30
   2   9   8   36.50    4.50
   2   9   8   39.80    4.40
  -3  -9  -8   70.99    6.40
   3   9   8   78.09    6.30
   3   9   8   81.79    6.40
  -4  -9  -8  227.38   15.00
   4   9   8  224.78   14.70
  -5  -9  -8   16.80    4.30
   5   9   8   15.80    3.60
  -6  -9  -8   83.99    9.40
   6   9   8   94.29    9.50
  -7  -9  -8    0.20    3.40
   7   9   8   -1.50    3.10
  -6  10   8    1.50    2.00
  -6  10   8   -0.90    3.90
  -5  10   8   82.39    6.40
  -5  10   8   87.19    9.90
  -4  10   8    4.60    1.70
  -4  10   8    1.70    3.30
  -3  10   8  125.09    7.80
  -3  10   8  114.19    9.90
   2 -10  -8   42.40    2.80
   2 -10  -8   41.30    2.70
  -2  10   8   39.60    3.60
  -2  10   8   36.40    3.60
  -2  10   8   59.89    6.70
   1 -10  -8   19.30    2.60
  -1  10   8   17.40    2.50
  -1  10   8   19.50    2.50
  -1  10   8   22.30    4.10
   0 -10  -8   37.10    3.60
   0  10   8   46.40    3.90
   0  10   8   37.80    3.80
   0  10   8   43.80    5.50
  -1 -10  -8    2.20    1.70
  -1 -10  -8    3.70    2.20
   1  10   8    1.00    1.60
   1  10   8    1.90    1.70
   1  10   8    5.70    2.40
  -2 -10  -8   29.50    4.80
  -2 -10  -8   35.30    4.20
   2  10   8   33.90    4.00
   2  10   8   25.60    3.80
   2  10   8   23.60    3.50
  -3 -10  -8   35.40    4.90
   3  10   8   34.60    4.60
   3  10   8   46.80    4.40
  -4 -10  -8    8.90    3.20
   4  10   8    2.30    2.50
  -5 -10  -8  140.49   10.60
   5  10   8  101.69    9.30
  -6 -10  -8    1.60    3.10
   6  10   8    5.00    3.20
  -7 -10  -8   64.49    8.70
   7  10   8   47.50    7.50
  -6  11   8   -5.40    3.50
  -5  11   8    0.60    1.50
  -5  11   8   -0.10    3.60
  -4  11   8   -2.70    3.00
  -4  11   8    4.70    1.50
  -3  11   8   37.60    3.20
  -3  11   8   31.20    5.30
  -2  11   8    0.70    2.40
  -2  11   8    1.70    1.20
  -2  11   8    0.40    1.30
   1 -11  -8  299.17   18.40
  -1  11   8  330.87   20.70
  -1  11   8  335.07   18.90
  -1  11   8  346.37   18.90
   0 -11  -8    0.40    1.20
   0  11   8    3.50    2.40
   0  11   8    1.60    1.50
   0  11   8    1.20    1.50
  -1 -11  -8  321.67   19.80
   1  11   8  339.47   20.00
   1  11   8  351.56   20.80
   1  11   8  337.77   19.90
  -2 -11  -8    5.20    2.30
   2  11   8    3.90    2.10
   2  11   8    0.20    1.90
   2  11   8    3.50    2.10
  -3 -11  -8  126.49    9.40
   3  11   8  114.99    8.90
  -4 -11  -8   -4.50    2.40
   4  11   8   -5.40    2.00
  -5 -11  -8   -0.30    3.00
   5  11   8    8.60    3.50
  -6 -11  -8   -1.60    3.60
   6  11   8   -1.70    3.00
  -7 -11  -8    9.90    5.00
   7  11   8    4.60    4.00
  -6  12   8    2.70    4.50
  -5  12   8   90.09   10.80
  -4  12   8    1.20    3.30
  -4  12   8    2.70    1.10
  -3  12   8   48.60    3.60
  -3  12   8   45.80    6.60
  -2  12   8   19.70    2.60
  -2  12   8   19.00    2.40
  -2  12   8   24.20    4.80
   1 -12  -8    3.90    1.10
  -1  12   8    6.50    1.70
  -1  12   8    2.20    2.80
  -1  12   8    4.40    1.50
   0 -12  -8   41.40    3.70
   0  12   8   43.00    5.60
   0  12   8   41.50    4.00
   0  12   8   40.90    4.00
  -1 -12  -8    3.20    1.90
   1  12   8    6.30    2.00
   1  12   8    6.30    2.60
   1  12   8    5.20    2.00
  -2 -12  -8   72.39    6.10
   2  12   8   67.09    5.80
   2  12   8   64.29    5.90
  -3 -12  -8   72.19    6.80
   3  12   8   68.39    6.40
  -4 -12  -8   14.00    3.70
   4  12   8    0.70    2.50
  -5 -12  -8   60.99    7.40
   5  12   8   63.39    7.50
  -6 -12  -8    1.80    3.50
   6  12   8   -2.30    2.80
  -5  13   8   -2.10    3.90
  -4  13   8  102.29    9.90
  -3  13   8   27.20    2.40
  -3  13   8   31.20    5.50
  -2  13   8   36.60    5.70
  -2  13   8   26.00    2.80
  -1  13   8   28.10    3.20
  -1  13   8   35.00    5.50
   0 -13  -8    3.40    1.50
   0  13   8    2.40    1.60
   0  13   8    3.80    2.70
   0  13   8    3.00    1.80
  -1 -13  -8   94.89    7.30
   1  13   8   98.39    7.50
   1  13   8  115.69    8.20
  -2 -13  -8   13.80    3.10
   2  13   8    9.60    2.90
   2  13   8   16.40    3.00
   2  13   8   12.90    3.20
  -3 -13  -8   39.70    5.10
   3  13   8   25.80    4.30
  -4 -13  -8   65.29    7.80
   4  13   8   67.69    7.60
  -5 -13  -8    1.00    3.30
   5  13   8   -4.60    2.50
  -6 -13  -8   27.70    6.30
   6  13   8   23.50    5.10
  -5  14   8   11.20    5.40
  -4  14   8   23.30    5.50
  -3  14   8   14.20    4.40
  -2  14   8  154.08   11.70
  -2  14   8  141.09    8.80
  -1  14   8    6.10    1.70
  -1  14   8   -2.50    2.80
   0  14   8  109.39    7.80
   0  14   8  112.59    9.10
   1  14   8    2.60    2.40
   1  14   8    0.80    1.70
  -2 -14  -8  119.19    9.10
   2  14   8  122.39    9.30
   2  14   8  128.89    8.80
  -3 -14  -8   -3.90    2.00
   3  14   8   -3.20    2.00
  -4 -14  -8   58.19    7.40
   4  14   8   62.49    7.30
  -5 -14  -8    1.20    3.60
   5  14   8    5.10    3.30
  -6 -14  -8    5.60    4.40
   6  14   8    0.70    3.50
  -4  15   8   96.79   11.10
  -3  15   8    4.90    3.60
  -2  15   8   42.70    6.40
  -2  15   8   48.10    3.70
  -1  15   8   10.40    2.20
  -1  15   8   10.40    3.80
   0  15   8   10.40    2.40
   0  15   8    9.00    3.10
   1  15   8   41.00    5.00
   1  15   8   32.10    4.30
   2  15   8   27.30    3.80
   2  15   8   36.10    4.90
   3  15   8   -2.50    2.20
  -4 -15  -8  107.59    9.60
   4  15   8   75.79    8.70
  -5 -15  -8    7.50    4.10
   5  15   8    0.20    3.00
  -4  16   8   10.50    4.80
  -3  16   8    9.10    4.10
  -2  16   8   41.50    6.60
  -2  16   8   37.40    3.50
  -1  16   8    1.90    1.50
  -1  16   8   -0.60    3.10
   0  16   8   42.10    4.70
   0  16   8   47.70    5.90
   1  16   8    6.10    2.50
   1  16   8    3.40    2.20
   2  16   8   15.60    3.60
   3  16   8   20.20    4.60
   4  16   8   21.70    4.60
   5  16   8   19.40    5.00
  -3  17   8   47.40    7.40
  -2  17   8    4.70    3.60
  -1  17   8   90.69    6.90
  -1  17   8  101.69    9.20
   0  17   8   -0.30    1.80
   1  17   8   95.99    8.10
   2  17   8    2.00    2.60
   3  17   8   41.80    6.10
   4  17   8    6.20    3.60
  -3  18   8   24.40    5.40
  -1  18   8    2.20    1.80
   0  18   8    6.80    2.60
   1  18   8    7.30    2.90
   2  18   8    2.20    3.00
   3  18   8   30.10    5.60
   0  19   8    1.60    2.30
   1  19   8   30.20    4.90
   2  19   8    4.70    3.40
   1  16  -9   35.90    6.80
   1  16  -9   24.80    5.50
   0  16  -9   15.00    4.70
   0  16  -9   15.90    4.80
  -1  16  -9   11.90    4.20
  -1  16  -9    0.30    3.60
  -2  16  -9   24.70    6.10
  -2  16  -9   14.30    4.20
   2  15  -9    3.20    3.70
   2  15  -9   -3.00    3.70
   1  15  -9   42.70    6.90
   1  15  -9   39.00    6.70
   0  15  -9    2.70    3.50
   0  15  -9    0.20    3.00
  -1  15  -9   72.49    7.90
  -1  15  -9   67.99    8.70
  -2  15  -9    3.60    4.10
  -2  15  -9   -1.60    2.70
  -3  15  -9   74.89   10.00
  -3  15  -9   70.89    6.90
  -4  15  -9   -1.10    3.20
  -4  15  -9   -1.00    2.20
   3  14  -9   60.19    7.70
   3  14  -9   81.29    9.50
   2  14  -9   -0.30    2.90
   2  14  -9    0.30    3.50
   1  14  -9   77.79    9.10
   1  14  -9   72.39    8.70
   0  14  -9   19.40    4.70
   0  14  -9   27.10    5.40
  -1  14  -9   10.50    3.70
  -1  14  -9   16.50    4.70
  -2  14  -9   10.90    3.70
  -2  14  -9   14.10    4.50
  -3  14  -9   -1.10    3.00
  -3  14  -9    2.90    2.60
  -4  14  -9    9.40    5.00
  -4  14  -9    1.50    2.40
   4  13  -9   41.70    7.20
  -4 -13   9   32.90    7.20
   3  13  -9    6.30    3.90
   3  13  -9    1.90    2.90
  -3 -13   9    4.30    4.50
   2  13  -9   22.90    5.20
   2  13  -9   23.40    5.10
  -2 -13   9   25.70    5.90
   1  13  -9    5.40    3.60
   1  13  -9    8.90    3.80
  -1 -13   9    3.60    4.80
   0  13  -9    5.40    3.20
   0  13  -9    9.30    3.60
  -1  13  -9   45.00    6.00
  -1  13  -9   45.00    6.70
  -2  13  -9    3.90    3.60
  -2  13  -9    1.30    2.80
  -3  13  -9   74.59    9.40
  -3  13  -9   96.79    7.70
  -4  13  -9   10.50    3.20
  -4  13  -9    5.60    4.10
  -5  13  -9   17.70    3.50
  -5  13  -9   15.10    5.10
   4  12  -9   -3.20    3.40
  -4 -12   9   -1.60    3.70
   3  12  -9   12.10    4.50
   3  12  -9    8.80    3.70
  -3 -12   9    4.40    4.00
   2  12  -9   14.10    4.10
   2  12  -9   13.10    4.40
  -2 -12   9   18.00    4.90
   1  12  -9   -1.60    3.00
   1  12  -9   -0.30    2.40
  -1 -12   9   -4.10    2.60
   0  12  -9  126.69   10.20
   0  12  -9  115.59   10.50
   0 -12   9  138.79   10.50
  -1  12  -9   -0.10    2.70
  -1  12  -9   12.50    3.70
  -2  12  -9  283.37   19.90
  -2  12  -9  304.37   18.80
  -3  12  -9   11.60    3.20
  -3  12  -9    8.80    3.90
  -4  12  -9   99.49   11.10
  -4  12  -9   87.59    7.40
  -5  12  -9    8.20    4.60
  -5  12  -9    2.50    2.40
   5  11  -9    1.10    3.90
  -5 -11   9   -3.00    3.80
   4  11  -9   94.39   10.40
  -4 -11   9  118.99   12.30
   3  11  -9   -2.50    2.40
   3  11  -9    3.40    3.30
  -3 -11   9   -1.20    3.80
   2  11  -9  117.59    9.60
   2  11  -9  115.59   10.20
  -2 -11   9  126.79   10.90
   1  11  -9   10.30    3.40
   1  11  -9    7.20    3.50
  -1 -11   9   18.00    4.60
   0  11  -9   19.30    4.30
   0  11  -9   16.50    4.20
   0 -11   9   29.30    4.70
  -1  11  -9   11.80    3.40
  -1  11  -9    9.00    3.50
   1 -11   9   12.10    3.50
  -2  11  -9   -1.00    2.60
  -2  11  -9    1.60    2.50
  -3  11  -9   -0.20    2.40
  -3  11  -9    1.30    3.70
  -4  11  -9   12.20    3.10
  -4  11  -9    5.80    3.60
  -5  11  -9    7.30    2.70
  -5  11  -9    4.40    4.00
  -6  11  -9   33.20    6.70
  -6  11  -9   34.20    4.70
   5  10  -9   18.10    5.30
  -5 -10   9   16.00    5.70
   4  10  -9    3.90    3.70
  -4 -10   9   -4.10    3.50
   3  10  -9   66.79    6.60
   3  10  -9   70.39    8.10
  -3 -10   9   62.59    8.30
   2  10  -9    9.00    3.20
   2  10  -9   14.60    3.90
  -2 -10   9   12.60    4.40
   1  10  -9   86.59    8.00
   1  10  -9  108.39    8.80
  -1 -10   9   99.89    8.80
   0  10  -9  142.39   10.40
   0  10  -9  124.39   10.40
   0 -10   9  141.99   10.60
  -1  10  -9    7.80    3.10
  -1  10  -9    0.50    2.30
  -1  10  -9    3.30    2.70
  -1  10  -9    2.80    1.80
   1 -10   9    1.60    2.40
  -2  10  -9  169.98   11.20
  -2  10  -9  143.49   11.60
   2 -10   9  147.49   10.70
  -3  10  -9   16.00    4.40
  -3  10  -9   24.60    4.00
  -4  10  -9  163.38   13.00
  -4  10  -9  163.88   11.30
  -5  10  -9   27.00    4.10
  -5  10  -9   31.20    6.40
  -6  10  -9   21.70    5.70
  -6  10  -9   20.60    3.80
   5   9  -9   12.30    4.40
  -5  -9   9    9.10    4.30
   4   9  -9   25.10    4.20
   4   9  -9   20.00    5.00
  -4  -9   9   17.90    5.20
   3   9  -9   23.20    4.70
   3   9  -9   27.10    4.40
  -3  -9   9   25.60    5.40
   2   9  -9   48.10    6.20
   2   9  -9   54.79    6.10
  -2  -9   9   49.30    4.60
  -2  -9   9   59.29    7.40
   1   9  -9  142.39   11.30
   1   9  -9  176.08   12.00
  -1  -9   9  157.68   10.00
  -1  -9   9  173.58   12.10
   0   9  -9   14.40    3.50
   0   9  -9   11.30    3.30
   0   9  -9   12.20    2.40
   0  -9   9   14.60    3.90
  -1   9  -9  208.78   13.80
  -1   9  -9  214.68   13.80
  -1   9  -9  207.38   14.20
  -1   9  -9  190.68   12.80
   1  -9   9  214.78   13.90
  -2   9  -9   10.10    2.90
  -2   9  -9   13.50    3.40
  -2   9  -9   13.40    3.70
   2  -9   9   13.70    3.00
  -3   9  -9   82.39    8.70
  -3   9  -9  112.19    8.20
   3  -9   9  108.59    7.70
  -4   9  -9    9.60    3.80
  -4   9  -9   -0.20    2.20
  -5   9  -9   53.19    5.90
  -5   9  -9   67.69    8.40
  -6   9  -9   20.10    5.30
  -6   9  -9   16.60    3.40
  -7   9  -9    3.80    2.70
  -7   9  -9   11.10    4.60
   6   8  -9   -0.50    3.80
  -6  -8   9    4.00    4.30
   5   8  -9  107.59   10.20
  -5  -8   9  109.69   10.60
   4   8  -9   14.70    4.30
   4   8  -9   17.30    3.40
  -4  -8   9   12.00    4.20
   3   8  -9  178.08   11.30
   3   8  -9  153.38   11.80
  -3  -8   9  157.58   10.90
  -3  -8   9  144.49   12.10
   2   8  -9    0.00    1.90
   2   8  -9    2.70    2.60
  -2  -8   9   -1.80    2.60
  -2  -8   9   -3.40    1.60
   1   8  -9  160.98   10.30
   1   8  -9  176.28   11.60
   1   8  -9  165.78   11.80
  -1  -8   9  172.08   12.10
  -1  -8   9  156.68   10.40
   0   8  -9   13.00    3.10
   0   8  -9    9.40    3.10
   0   8  -9    9.90    2.20
   0  -8   9    8.00    3.00
  -1   8  -9   42.10    5.70
  -1   8  -9   54.99    5.90
  -1   8  -9   46.50    4.40
  -1   8  -9   45.30    5.40
   1  -8   9   53.99    6.10
  -2   8  -9    5.50    2.40
  -2   8  -9    7.70    3.20
  -2   8  -9    6.10    2.80
   2  -8   9    5.30    2.40
  -3   8  -9   39.60    4.80
  -3   8  -9   30.60    5.60
  -3   8  -9   42.50    5.10
   3  -8   9   38.20    4.40
  -4   8  -9    1.50    2.30
  -4   8  -9    3.30    3.00
  -5   8  -9  113.29   10.10
  -5   8  -9  107.49    8.50
  -6   8  -9    1.60    2.20
  -6   8  -9   -0.40    3.40
  -7   8  -9   95.09   10.60
  -7   8  -9   77.99    7.70
   6   7  -9   16.00    5.20
  -6  -7   9    9.00    4.20
   5   7  -9    7.00    4.10
  -5  -7   9    4.80    3.90
   4   7  -9   53.89    5.50
   4   7  -9   42.50    6.40
  -4  -7   9   69.09    8.20
  -4  -7   9   45.70    5.90
   3   7  -9   40.70    5.70
   3   7  -9   39.20    4.90
  -3  -7   9   47.50    5.50
  -3  -7   9   38.80    6.10
   2   7  -9   57.89    5.60
   2   7  -9   63.79    6.90
  -2  -7   9   53.69    5.10
  -2  -7   9   50.39    6.60
   1   7  -9  201.38   11.90
   1   7  -9  196.18   12.80
   1   7  -9  180.08   12.80
  -1  -7   9  180.98   13.10
  -1  -7   9  187.28   12.10
   0   7  -9    0.70    2.10
   0   7  -9    0.50    1.50
   0   7  -9   -0.50    2.00
   0  -7   9   -1.80    1.40
   0  -7   9    2.80    2.30
  -1   7  -9  313.77   20.00
  -1   7  -9  321.27   19.80
  -1   7  -9  287.27   19.10
  -1   7  -9  345.47   20.00
   1  -7   9  352.96   20.10
  -2   7  -9   10.70    3.40
  -2   7  -9   10.80    3.20
  -2   7  -9   13.30    3.00
   2  -7   9   11.20    2.70
  -3   7  -9  222.98   15.00
  -3   7  -9  245.08   15.00
  -3   7  -9  206.48   15.60
   3  -7   9  258.27   14.80
  -4   7  -9   38.80    5.60
  -4   7  -9   34.30    4.80
  -4   7  -9   25.40    5.10
   4  -7   9   38.20    4.30
  -5   7  -9   50.09    5.70
  -5   7  -9   46.50    6.90
  -6   7  -9   49.30    5.90
  -6   7  -9   62.89    8.10
  -7   7  -9   20.90    5.50
  -7   7  -9   13.40    3.80
   6   6  -9    1.10    3.50
  -6  -6   9    6.60    4.10
   5   6  -9   39.60    6.40
  -5  -6   9   48.70    6.50
  -5  -6   9   37.90    6.40
   4   6  -9    1.00    2.80
   4   6  -9   -1.20    1.70
  -4  -6   9   -0.50    2.90
  -4  -6   9    0.20    2.20
   3   6  -9   82.49    7.70
   3   6  -9   88.89    6.70
  -3  -6   9   78.89    6.90
  -3  -6   9   77.29    8.70
   2   6  -9  112.99    9.00
   2   6  -9  125.09    8.70
  -2  -6   9  107.59    9.20
  -2  -6   9  118.79    8.50
   1   6  -9   32.90    4.50
   1   6  -9   43.40    4.10
   1   6  -9   48.60    5.70
  -1  -6   9   45.70    4.50
  -1  -6   9   51.09    6.20
   0   6  -9  485.55   29.20
   0   6  -9  465.25   29.10
   0   6  -9  529.15   28.80
   0   6  -9  495.15   29.40
   0  -6   9  507.35   28.70
   0  -6   9  493.45   29.50
  -1   6  -9   11.10    2.70
  -1   6  -9   12.60    3.00
  -1   6  -9    9.50    2.30
  -1   6  -9    9.30    3.00
   1  -6   9    4.60    2.60
  -2   6  -9  526.15   29.10
  -2   6  -9  464.85   29.30
  -2   6  -9  497.05   28.90
   2  -6   9  476.05   28.70
  -3   6  -9    2.30    2.10
  -3   6  -9    3.70    2.70
  -3   6  -9    1.80    2.40
   3  -6   9   -0.10    1.70
  -4   6  -9  135.09   11.40
  -4   6  -9  141.59   10.50
  -4   6  -9  173.08   11.00
   4  -6   9  155.88   10.10
  -5   6  -9   49.30    5.70
  -5   6  -9   43.20    6.70
  -6   6  -9   19.10    4.60
  -6   6  -9    8.40    3.10
  -7   6  -9   46.00    7.20
  -7   6  -9   27.70    4.80
   6   5  -9   75.59    9.10
  -6  -5   9  100.59   11.00
  -6  -5   9   94.19    9.10
   5   5  -9   -3.00    2.60
  -5  -5   9    0.70    3.00
  -5  -5   9    4.60    3.30
   4   5  -9  260.37   16.90
   4   5  -9  253.27   15.20
  -4  -5   9  237.28   16.40
  -4  -5   9  255.17   17.20
   3   5  -9    8.50    3.00
   3   5  -9    6.00    2.30
  -3  -5   9    3.80    3.00
  -3  -5   9    6.20    2.70
[truncated: 644,560 more chars]
